# Supplementary material for: Ionizing Radiation Potentiates High-Fat Diet–Induced Insulin Resistance and Reprograms Skeletal Muscle and Adipose Progenitor Cells
Source: Oxford University Press journal article supplement (doi:10.2337/db16-0364), 2016-09-20
Supplement: db160364supplementarydata2.xlsx [file db160364supplementarydata2.xlsx]

## Sheet: Radiation
	seqnames	start	end	width	strand	median.p	median.meth.group1	median.meth.group2	median.meth.diff	annotation	geneChr	geneStart	geneEnd	geneLength	geneStrand	geneId	transcriptId	distanceToTSS	ENSEMBL	SYMBOL	GENENAME
1	chr1	4857550	4857551	2	*	3.47516e-06	0.00164473	3.17694e-05	0.00161296	Promoter (<=1kb)	chr1	4857694	4897909	40216	+	21399	uc007afi.2	-144	ENSMUSG00000033813	Tcea1	transcription elongation factor A (SII) 1
2	chr1	4857764	4857804	41	*	3.31277e-07	0.00195441	3.22356e-05	0.00192218	Promoter (<=1kb)	chr1	4857694	4897909	40216	+	21399	uc007afi.2	110	ENSMUSG00000033813	Tcea1	transcription elongation factor A (SII) 1
3	chr1	9700457	9700499	43	*	3.11656e-08	0.434205	0.00286957	0.431336	Promoter (<=1kb)	chr1	9667411	9700209	32799	-	17864	uc007agq.2	-248	ENSMUSG00000025912	Mybl1	myeloblastosis oncogene-like 1
4	chr1	9700771	9700771	1	*	1.52668e-07	3.50802e-05	0.00304575	-0.00301067	Promoter (<=1kb)	chr1	9667411	9700209	32799	-	17864	uc007agq.2	-562	ENSMUSG00000025912	Mybl1	myeloblastosis oncogene-like 1
5	chr1	10040162	10040196	35	*	2.77384e-06	0.00290952	5.09226e-05	0.00285859	Promoter (<=1kb)	chr1	10039773	10067976	28204	+	211660	uc007ahj.1	423	ENSMUSG00000056763	Cspp1	centrosome and spindle pole associated protein 1
6	chr1	13373666	13373666	1	*	6.30829e-17	0.384185	0.000182295	0.384003	Promoter (<=1kb)	chr1	13139105	13374083	234979	-	17978	uc007aim.2	417	ENSMUSG00000005886	Ncoa2	nuclear receptor coactivator 2
7	chr1	13589195	13589325	131	*	4.9417e-09	0.00313281	3.28282e-05	0.00302981	Promoter (<=1kb)	chr1	13564693	13589910	25218	-	72265	uc007ait.2	585	ENSMUSG00000025935	Tram1	translocating chain-associating membrane protein 1
8	chr1	15806060	15806105	46	*	3.2193e-06	0.00305636	5.17356e-05	0.00300462	Promoter (<=1kb)	chr1	15805646	15822013	16368	+	21749	uc007ajf.2	459	ENSMUSG00000025925	Terf1	telomeric repeat binding factor 1
9	chr1	16518663	16518673	11	*	0.00428103	0.00103597	0.0197945	-0.0187585	Promoter (<=1kb)	chr1	16228810	16519302	290493	-	29819	uc007ajn.2	629	ENSMUSG00000025920	Stau2	staufen (RNA binding protein) homolog 2 (Drosophila)
10	chr1	16518684	16518761	78	*	1.95989e-05	0.296754	0.00728557	0.289469	Promoter (<=1kb)	chr1	16228810	16519302	290493	-	29819	uc007ajn.2	541	ENSMUSG00000025920	Stau2	staufen (RNA binding protein) homolog 2 (Drosophila)
11	chr1	16518983	16519188	206	*	3.43674e-05	5.91556e-05	0.00205565	-0.00201185	Promoter (<=1kb)	chr1	16228810	16519302	290493	-	29819	uc007ajn.2	114	ENSMUSG00000025920	Stau2	staufen (RNA binding protein) homolog 2 (Drosophila)
12	chr1	16519928	16519928	1	*	5.97837e-06	3.01331e-05	0.00192153	-0.0018914	Promoter (<=1kb)	chr1	16228810	16519302	290493	-	29819	uc007ajn.2	-626	ENSMUSG00000025920	Stau2	staufen (RNA binding protein) homolog 2 (Drosophila)
13	chr1	16520008	16520008	1	*	7.97942e-36	0.0380185	6.87893e-05	0.0379497	Promoter (<=1kb)	chr1	16228810	16519302	290493	-	29819	uc007ajn.2	-706	ENSMUSG00000025920	Stau2	staufen (RNA binding protein) homolog 2 (Drosophila)
14	chr1	16688649	16688661	13	*	7.61479e-09	0.384151	0.002948	0.381203	Promoter (<=1kb)	chr1	16688456	16709605	21150	+	17087	uc007ajz.2	205	ENSMUSG00000025779	Ly96	lymphocyte antigen 96
15	chr1	20820133	20820133	1	*	7.43524e-17	0.384965	0.000200148	0.384765	Promoter (<=1kb)	chr1	20803014	20820213	17200	-	17215	uc007alc.1	80	ENSMUSG00000041859	Mcm3	minichromosome maintenance deficient 3 (S. cerevisiae)
16	chr1	24005481	24005607	127	*	1.1485e-10	0.383342	0.00170058	0.381659	Promoter (<=1kb)	chr1	23995939	24005640	9702	-	68002	uc007amj.2	33	ENSMUSG00000026154	Sdhaf4	succinate dehydrogenase complex assembly factor 4
17	chr1	30949359	30949443	85	*	2.70561e-13	3.04525e-05	0.00451912	-0.00448393	Promoter (<=1kb)	chr1	30940303	30949755	9453	-	19243	uc007anh.1	312	ENSMUSG00000026064	Ptp4a1	protein tyrosine phosphatase 4a1
18	chr1	34012082	34012082	1	*	0.0021421	0.13791	0.00739526	0.130514	Promoter (<=1kb)	chr1	34011825	34308662	296838	+	13518	uc007aoi.2	257	ENSMUSG00000026131	Dst	dystonin
19	chr1	34678498	34678544	47	*	9.92392e-06	9.53233e-05	0.00576872	-0.0056734	Intron (uc007ape.1/uc007ape.1, intron 1 of 1)	chr1	34633535	34636210	2676	-	241051	uc011wjd.1	-42288	#N/A	AA619741	PHD finger protein 19 pseudogene
20	chr1	36308119	36308160	42	*	1.69654e-06	0.00400206	4.23568e-05	0.0039597	Promoter (<=1kb)	chr1	36307733	36324029	16297	+	214855	uc007apu.2	427	ENSMUSG00000037447	Arid5a	AT rich interactive domain 5A (MRF1-like)
21	chr1	36471391	36471401	11	*	2.63521e-14	0.384466	0.000412067	0.384054	Promoter (<=1kb)	chr1	36471597	36508776	37180	+	94220	uc007aqg.2	-206	ENSMUSG00000037408	Cnnm4	cyclin M4
22	chr1	36471657	36471685	29	*	2.14726e-08	0.00624581	3.48678e-05	0.00621095	Promoter (<=1kb)	chr1	36471597	36508776	37180	+	94220	uc007aqg.2	88	ENSMUSG00000037408	Cnnm4	cyclin M4
23	chr1	36512067	36512070	4	*	0.00342988	0.000925893	0.0186477	-0.0177218	Promoter (<=1kb)	chr1	36511876	36528237	16362	+	94218	uc007aqi.1	194	ENSMUSG00000001138	Cnnm3	cyclin M3
24	chr1	36512245	36512336	92	*	1.50086e-06	8.50274e-05	0.0114869	-0.0114019	Promoter (<=1kb)	chr1	36511876	36528237	16362	+	94218	uc007aqi.1	460	ENSMUSG00000001138	Cnnm3	cyclin M3
25	chr1	36512857	36512916	60	*	2.78484e-11	3.6158e-05	0.00411744	-0.00408276	Promoter (1-2kb)	chr1	36511876	36528237	16362	+	94218	uc007aqi.1	1040	ENSMUSG00000001138	Cnnm3	cyclin M3
26	chr1	36557881	36557928	48	*	1.52661e-05	0.00149248	0.0216503	-0.020081	Promoter (<=1kb)	chr1	36548639	36557557	8919	-	20353	uc007aqq.4	-324	ENSMUSG00000026121	Sema4c	sema domain, immunoglobulin domain (Ig), transmembrane domain (TM) and short cytoplasmic domain, (semaphorin) 4C
27	chr1	36558286	36558489	204	*	4.80968e-05	0.00153917	3.65367e-05	0.00150264	Promoter (<=1kb)	chr1	36548639	36558381	9743	-	20353	uc007aqr.4	0	ENSMUSG00000026121	Sema4c	sema domain, immunoglobulin domain (Ig), transmembrane domain (TM) and short cytoplasmic domain, (semaphorin) 4C
28	chr1	37996947	37996995	49	*	1.54822e-07	0.00527234	4.27912e-05	0.00522955	Promoter (<=1kb)	chr1	37983867	37997208	13342	-	98258	uc007asm.1	213	ENSMUSG00000058407	Txndc9	thioredoxin domain containing 9
29	chr1	38129370	38129423	54	*	1.52999e-06	0.369777	0.00525835	0.364609	Promoter (<=1kb)	chr1	38052786	38129662	76877	-	56210	uc007asr.1	239	ENSMUSG00000026082	Rev1	REV1 homolog (S. cerevisiae)
30	chr1	38129650	38129700	51	*	2.6296e-05	0.000718163	3.0043e-05	0.00068812	Promoter (<=1kb)	chr1	38052786	38129662	76877	-	56210	uc007asr.1	0	ENSMUSG00000026082	Rev1	REV1 homolog (S. cerevisiae)
31	chr1	39193431	39193522	92	*	4.46982e-09	0.103108	0.000710681	0.0996639	Promoter (<=1kb)	chr1	39194272	39363240	168969	+	18143	uc007atd.2	-841	ENSMUSG00000026077	Npas2	neuronal PAS domain protein 2
32	chr1	39193632	39193643	12	*	1.07995e-06	0.00108307	3.03857e-05	0.00105268	Promoter (<=1kb)	chr1	39194272	39363240	168969	+	18143	uc007atd.2	-640	ENSMUSG00000026077	Npas2	neuronal PAS domain protein 2
33	chr1	39367827	39367861	35	*	1.09221e-11	0.382787	0.000880199	0.381907	Promoter (<=1kb)	chr1	39367851	39371366	3516	+	114641	uc007ate.2	0	ENSMUSG00000073702	Rpl31	ribosomal protein L31
34	chr1	39367990	39368091	102	*	1.72792e-06	0.00274877	3.48027e-05	0.00271397	Promoter (<=1kb)	chr1	39367851	39371366	3516	+	114641	uc007ate.2	240	ENSMUSG00000073702	Rpl31	ribosomal protein L31
35	chr1	39368766	39368830	65	*	2.42567e-05	0.00581265	0.361189	-0.355382	Promoter (<=1kb)	chr1	39367851	39371366	3516	+	114641	uc007ate.2	979	ENSMUSG00000073702	Rpl31	ribosomal protein L31
36	chr1	39900474	39900494	21	*	2.34612e-05	3.3818e-05	0.00149042	-0.00145661	Promoter (<=1kb)	chr1	39900913	40026310	125398	+	26921	uc007atr.1	-439	ENSMUSG00000026074	Map4k4	mitogen-activated protein kinase kinase kinase kinase 4
37	chr1	39900591	39900783	193	*	3.77708e-11	0.383791	0.00131769	0.382168	Promoter (<=1kb)	chr1	39900913	40026310	125398	+	26921	uc007atr.1	-322	ENSMUSG00000026074	Map4k4	mitogen-activated protein kinase kinase kinase kinase 4
38	chr1	39901024	39901099	76	*	1.36578e-06	2.96197e-05	0.000825754	-0.000796134	Promoter (<=1kb)	chr1	39900913	40026310	125398	+	26921	uc007atr.1	186	ENSMUSG00000026074	Map4k4	mitogen-activated protein kinase kinase kinase kinase 4
39	chr1	39901310	39901359	50	*	7.88821e-15	0.385	0.000364413	0.384636	Promoter (<=1kb)	chr1	39900913	40026310	125398	+	26921	uc007atr.1	446	ENSMUSG00000026074	Map4k4	mitogen-activated protein kinase kinase kinase kinase 4
40	chr1	43934152	43934381	230	*	1.52209e-07	3.61263e-05	0.00358733	-0.00354421	Promoter (<=1kb)	chr1	43934007	43957003	22997	+	22019	uc007avr.1	374	ENSMUSG00000041763	Tpp2	tripeptidyl peptidase II
41	chr1	44148039	44148040	2	*	0.000194601	0.00211866	0.171423	-0.169305	Promoter (<=1kb)	chr1	44147932	44178374	30443	+	22592	uc007awj.1	108	ENSMUSG00000026048	Ercc5	excision repair cross-complementing rodent repair deficiency, complementation group 5
42	chr1	46066855	46066855	1	*	0.00411419	0.0104258	0.11573	-0.105304	Promoter (<=1kb)	chr1	46066738	46373550	306813	+	227058	uc007awx.2	117	ENSMUSG00000041144	Dnah7b	dynein, axonemal, heavy chain 7B
43	chr1	46067065	46067101	37	*	2.25449e-08	0.362398	0.00247361	0.359924	Promoter (<=1kb)	chr1	46066738	46373550	306813	+	227058	uc007awx.2	363	ENSMUSG00000041144	Dnah7b	dynein, axonemal, heavy chain 7B
44	chr1	51598583	51598632	50	*	5.16092e-06	0.99373	0.760302	0.232957	Distal Intergenic	chr1	51469488	51478419	8932	-	109019	uc007axo.1	-120164	ENSMUSG00000026107	Nabp1	nucleic acid binding protein 1
45	chr1	51915313	51915338	26	*	0.000536386	0.00230217	0.0473616	-0.0450594	Promoter (<=1kb)	chr1	51749758	51915978	166221	-	17912	uc007axr.3	640	ENSMUSG00000018417	Myo1b	myosin IB
46	chr1	53784827	53784865	39	*	6.45942e-05	4.16078e-05	0.00156359	-0.00152198	Promoter (<=1kb)	chr1	53755512	53785215	29704	-	98267	uc007azj.2	350	ENSMUSG00000026094	Stk17b	serine/threonine kinase 17b (apoptosis-inducing)
47	chr1	53785133	53785161	29	*	4.98628e-07	0.00202451	3.46198e-05	0.00198989	Promoter (<=1kb)	chr1	53755512	53785215	29704	-	98267	uc007azj.2	54	ENSMUSG00000026094	Stk17b	serine/threonine kinase 17b (apoptosis-inducing)
48	chr1	53785421	53785531	111	*	5.83646e-05	0.00010505	0.00702178	-0.00694403	Promoter (<=1kb)	chr1	53755512	53785215	29704	-	98267	uc007azj.2	-206	ENSMUSG00000026094	Stk17b	serine/threonine kinase 17b (apoptosis-inducing)
49	chr1	54194546	54194553	8	*	1.35909e-09	0.00398368	3.50224e-05	0.00394866	Promoter (<=1kb)	chr1	53806874	54195034	388161	-	329152	uc007azk.2	481	ENSMUSG00000042807	Hecw2	HECT, C2 and WW domain containing E3 ubiquitin protein ligase 2
50	chr1	55406610	55406637	28	*	2.37997e-06	0.000110348	0.0168995	-0.0167891	Promoter (<=1kb)	chr1	55405946	55754285	348340	+	227120	uc007ban.2	691	ENSMUSG00000038349	Plcl1	phospholipase C-like 1
51	chr1	56977273	56977273	1	*	1.12021e-07	0.00266876	4.40668e-05	0.00262469	Intron (uc007bat.2/329160, intron 1 of 4)	chr1	56971469	56975196	3728	+	329160	uc011wld.1	5804	ENSMUSG00000087022	9130024F11Rik	RIKEN cDNA 9130024F11 gene
52	chr1	57377572	57377602	31	*	5.57789e-05	0.000602674	3.05205e-05	0.000572154	Promoter (<=1kb)	chr1	57359222	57377544	18323	-	75323	uc007bax.1	-28	ENSMUSG00000097519	4930558J18Rik	RIKEN cDNA 4930558J18 gene
53	chr1	57377995	57378040	46	*	0.000321622	2.99333e-05	0.000470703	-0.00044077	Promoter (<=1kb)	chr1	57377620	57385422	7803	+	73467	uc007bay.2	420	ENSMUSG00000038323	1700066M21Rik	RIKEN cDNA 1700066M21 gene
54	chr1	57969691	57969691	1	*	3.08807e-05	3.53049e-05	0.00149241	-0.00145711	Promoter (<=1kb)	chr1	57955101	57969524	14424	-	51960	uc011wlh.1	-167	ENSMUSG00000054770	Kctd18	potassium channel tetramerisation domain containing 18
55	chr1	57969896	57969900	5	*	1.12555e-10	0.385348	0.00127862	0.38407	Promoter (<=1kb)	chr1	57955101	57970084	14984	-	51960	uc007bbf.2	184	ENSMUSG00000054770	Kctd18	potassium channel tetramerisation domain containing 18
56	chr1	57970153	57970245	93	*	8.19125e-05	2.99102e-05	0.000768979	-0.000739068	Promoter (<=1kb)	chr1	57955101	57970084	14984	-	51960	uc007bbf.2	-69	ENSMUSG00000054770	Kctd18	potassium channel tetramerisation domain containing 18
57	chr1	58652812	58652855	44	*	8.89543e-05	0.00118703	4.20138e-05	0.00114502	Promoter (<=1kb)	chr1	58652641	58655831	3191	+	100504501	uc007bcl.1	214	ENSMUSG00000102059	Gm20257	caspase 8 pseudogene
58	chr1	59237045	59237045	1	*	3.50444e-07	0.00227893	3.48036e-05	0.00224413	Promoter (<=1kb)	chr1	59162756	59237093	74338	-	74018	uc011wlp.1	48	ENSMUSG00000026024	Als2	amyotrophic lateral sclerosis 2 (juvenile)
59	chr1	59237166	59237187	22	*	6.67866e-13	0.384803	0.000839527	0.383959	Promoter (<=1kb)	chr1	59162756	59237231	74476	-	74018	uc007bdm.2	44	ENSMUSG00000026024	Als2	amyotrophic lateral sclerosis 2 (juvenile)
60	chr1	59670090	59670090	1	*	2.77165e-06	4.65324e-05	0.00607554	-0.00602901	Promoter (<=1kb)	chr1	59639434	59670834	31401	-	22218	uc007bdx.1	744	ENSMUSG00000026021	Sumo1	small ubiquitin-like modifier 1
61	chr1	59670199	59670249	51	*	3.40941e-05	0.00151022	4.18242e-05	0.00146839	Promoter (<=1kb)	chr1	59639434	59670834	31401	-	22218	uc007bdx.1	585	ENSMUSG00000026021	Sumo1	small ubiquitin-like modifier 1
62	chr1	59684910	59684954	45	*	0.000134817	3.12151e-05	0.000797179	-0.000765964	Promoter (<=1kb)	chr1	59685006	59711510	26505	+	55989	uc007bdy.1	-96	ENSMUSG00000026020	Nop58	NOP58 ribonucleoprotein
63	chr1	59762848	59762913	66	*	3.97929e-05	0.000356517	0.0131973	-0.0128407	Promoter (1-2kb)	chr1	59764279	59878081	113803	+	12168	uc007bdz.2	-1431	ENSMUSG00000067336	Bmpr2	bone morphogenetic protein receptor, type II (serine/threonine kinase)
64	chr1	59763029	59763054	26	*	2.57911e-08	0.00378073	5.44477e-05	0.00372629	Promoter (1-2kb)	chr1	59764279	59878081	113803	+	12168	uc007bdz.2	-1250	ENSMUSG00000067336	Bmpr2	bone morphogenetic protein receptor, type II (serine/threonine kinase)
65	chr1	60343407	60343560	154	*	3.93569e-12	0.38378	0.000631853	0.382949	Promoter (<=1kb)	chr1	60343372	60372707	29336	+	77951	uc007bem.1	188	ENSMUSG00000049439	Cyp20a1	cytochrome P450, family 20, subfamily a, polypeptide 1
66	chr1	60566774	60566820	47	*	3.31087e-08	0.00233052	3.61044e-05	0.00229441	Promoter (<=1kb)	chr1	60483185	60566765	83581	-	77300	uc007bet.2	-9	ENSMUSG00000026014	Raph1	Ras association (RalGDS/AF-6) and pleckstrin homology domains 1
67	chr1	62703065	62703118	54	*	3.97194e-05	0.00129585	3.7326e-05	0.00125853	Promoter (<=1kb)	chr1	62703317	62739932	36616	+	18187	uc007bfi.1	-252	ENSMUSG00000025969	Nrp2	neuropilin 2
68	chr1	62703431	62703551	121	*	1.94189e-05	0.000878622	3.11335e-05	0.000847488	Promoter (<=1kb)	chr1	62703317	62739932	36616	+	18187	uc007bfi.1	234	ENSMUSG00000025969	Nrp2	neuropilin 2
69	chr1	62703675	62703675	1	*	0.00248892	0.00704447	0.166138	-0.159094	Promoter (<=1kb)	chr1	62703317	62739932	36616	+	18187	uc007bfi.1	358	ENSMUSG00000025969	Nrp2	neuropilin 2
70	chr1	64121900	64121972	73	*	6.60493e-05	3.0397e-05	0.000850925	-0.000820528	Promoter (<=1kb)	chr1	64035671	64121426	85756	-	93691	uc007bgp.2	-474	ENSMUSG00000025959	Klf7	Kruppel-like factor 7 (ubiquitous)
71	chr1	64122007	64122133	127	*	3.44005e-05	0.00171251	4.4555e-05	0.00166796	Promoter (<=1kb)	chr1	64035671	64121426	85756	-	93691	uc007bgp.2	-581	ENSMUSG00000025959	Klf7	Kruppel-like factor 7 (ubiquitous)
72	chr1	64533413	64533413	1	*	6.00567e-10	0.434465	0.00137267	0.433092	Promoter (<=1kb)	chr1	64532804	64604548	71745	+	12912	uc007bgr.1	609	ENSMUSG00000025958	Creb1	cAMP responsive element binding protein 1
73	chr1	64533423	64533473	51	*	0.000144231	3.01157e-05	0.000604761	-0.000574645	Promoter (<=1kb)	chr1	64532804	64604548	71745	+	12912	uc007bgr.1	669	ENSMUSG00000025958	Creb1	cAMP responsive element binding protein 1
74	chr1	64691183	64691183	1	*	1.28028e-06	0.00360618	4.78769e-05	0.00355831	Promoter (<=1kb)	chr1	64691213	64725642	34430	+	227210	uc007bgx.1	-30	ENSMUSG00000070871	Ccnyl1	cyclin Y-like 1
75	chr1	64691318	64691533	216	*	1.85946e-05	0.00226703	5.71259e-05	0.0022099	Promoter (<=1kb)	chr1	64691213	64725642	34430	+	227210	uc007bgx.1	320	ENSMUSG00000070871	Ccnyl1	cyclin Y-like 1
76	chr1	65186817	65186910	94	*	5.77426e-08	3.2108e-05	0.00357012	-0.00353812	Promoter (<=1kb)	chr1	65186685	65226117	39433	+	18711	uc007bhq.1	225	ENSMUSG00000025949	Pikfyve	phosphoinositide kinase, FYVE finger containing
77	chr1	65979705	65979705	1	*	0.000302159	0.962087	0.721026	0.24106	Distal Intergenic	chr1	65926522	65928304	1783	+	12969	uc007bhv.1	53183	ENSMUSG00000025945	Crygf	crystallin, gamma F
78	chr1	66816438	66816447	10	*	2.08596e-15	0.00642512	4.09953e-05	0.00638412	Promoter (1-2kb)	chr1	66719243	66817461	98219	-	68691	uc011wml.1	1014	ENSMUSG00000026004	Kansl1l	KAT8 regulatory NSL complex subunit 1-like
79	chr1	66862715	66862732	18	*	5.41962e-08	0.324283	0.00223417	0.322049	Promoter (<=1kb)	chr1	66830839	66863309	32471	-	11363	uc007bir.2	577	ENSMUSG00000026003	Acadl	acyl-Coenzyme A dehydrogenase, long-chain
80	chr1	72264812	72264812	1	*	0.000198799	0.831078	0.978958	-0.14788	Exon (uc007bkh.1/uc007bkh.1, exon 2 of 4)	chr1	72259173	72284314	25142	-	111175	uc007bki.2	19502	ENSMUSG00000026189	Pecr	peroxisomal trans-2-enoyl-CoA reductase
81	chr1	72824472	72824521	50	*	0.000198976	0.00129136	5.29956e-05	0.00123837	Promoter (<=1kb)	chr1	72824480	72852471	27992	+	16008	uc007bkw.2	0	ENSMUSG00000039323	Igfbp2	insulin-like growth factor binding protein 2
82	chr1	73015715	73015737	23	*	1.30211e-05	0.992591	0.921228	0.0664146	Promoter (<=1kb)	chr1	73015075	73015899	825	-	21958	uc007bkz.2	162	ENSMUSG00000026182	Tnp1	transition protein 1
83	chr1	74391451	74391493	43	*	1.25701e-11	0.00421627	3.46696e-05	0.0041816	Promoter (<=1kb)	chr1	74391609	74397285	5677	+	227292	uc007blz.2	-158	ENSMUSG00000026176	Ctdsp1	CTD (carboxy-terminal domain, RNA polymerase II, polypeptide A) small phosphatase 1
84	chr1	74661856	74661902	47	*	7.97131e-13	0.384166	0.000642123	0.383524	Promoter (<=1kb)	chr1	74661754	74697973	36220	+	67534	uc007bmy.1	148	ENSMUSG00000033257	Ttll4	tubulin tyrosine ligase-like family, member 4
85	chr1	74771963	74772042	80	*	1.56481e-07	0.00279153	5.32221e-05	0.00274909	Promoter (<=1kb)	chr1	74771892	74785319	13428	+	22420	uc007bne.1	150	ENSMUSG00000033227	Wnt6	wingless-type MMTV integration site family, member 6
86	chr1	74772061	74772076	16	*	1.83063e-06	0.00479457	0.45644	-0.451645	Promoter (<=1kb)	chr1	74771892	74785319	13428	+	22420	uc007bne.1	184	ENSMUSG00000033227	Wnt6	wingless-type MMTV integration site family, member 6
87	chr1	74949831	74949860	30	*	6.41939e-05	3.33052e-05	0.00130515	-0.00127185	Promoter (1-2kb)	chr1	74945318	74951651	6334	-	16147	uc007bnl.1	1791	ENSMUSG00000006538	Ihh	Indian hedgehog
88	chr1	75141627	75141704	78	*	7.92239e-09	0.00397281	3.89028e-05	0.00393234	Promoter (<=1kb)	chr1	75135215	75141587	6373	-	69171	uc007bnp.1	-40	ENSMUSG00000033159	Cnppd1	cyclin Pas1/PHO80 domain containing 1
89	chr1	75143118	75143189	72	*	1.98561e-06	0.377309	0.00757617	0.370091	Promoter (<=1kb)	chr1	75143158	75147909	4752	+	227298	uc007bnv.2	0	ENSMUSG00000049339	Fam134a	family with sequence similarity 134, member A
90	chr1	75143219	75143228	10	*	3.25047e-09	3.20607e-05	0.00947985	-0.00944779	Promoter (<=1kb)	chr1	75143158	75147909	4752	+	227298	uc007bnv.2	70	ENSMUSG00000049339	Fam134a	family with sequence similarity 134, member A
91	chr1	75505566	75505682	117	*	3.49689e-54	3.20496e-05	0.011946	-0.0119112	Promoter (<=1kb)	chr1	75485825	75506452	20628	-	98733	uc007bpn.2	770	ENSMUSG00000026211	Obsl1	obscurin-like 1
92	chr1	75505925	75505955	31	*	0.000108981	3.01435e-05	0.00125198	-0.00122183	Promoter (<=1kb)	chr1	75485825	75506452	20628	-	98733	uc007bpn.2	497	ENSMUSG00000026211	Obsl1	obscurin-like 1
93	chr1	75506383	75506383	1	*	4.33189e-11	0.0125234	3.04987e-05	0.0124929	Promoter (<=1kb)	chr1	75485825	75506452	20628	-	98733	uc007bpn.2	69	ENSMUSG00000026211	Obsl1	obscurin-like 1
94	chr1	75546427	75546578	152	*	1.1138e-05	7.37298e-05	0.00729741	-0.00724987	Promoter (<=1kb)	chr1	75546644	75559431	12788	+	20536	uc007bpw.2	-217	ENSMUSG00000006576	Slc4a3	solute carrier family 4 (anion exchanger), member 3
95	chr1	78817992	78818017	26	*	0.000263816	0.623487	0.958893	-0.335406	Promoter (1-2kb)	chr1	78816949	78820025	3077	+	57814	uc007bqq.1	1068	ENSMUSG00000047330	Kcne4	potassium voltage-gated channel, Isk-related subfamily, gene 4
96	chr1	79761617	79761810	194	*	1.90225e-08	0.0102566	0.00053567	0.00972092	Promoter (<=1kb)	chr1	79702262	79761769	59508	-	69368	uc007bqu.2	0	ENSMUSG00000073643	Wdfy1	WD repeat and FYVE domain containing 1
97	chr1	82291816	82291878	63	*	7.21897e-08	0.380699	0.00508087	0.375618	Promoter (<=1kb)	chr1	82233105	82291439	58335	-	16367	uc007brp.2	-377	ENSMUSG00000055980	Irs1	insulin receptor substrate 1
98	chr1	82316577	82316620	44	*	3.40601e-09	0.00361847	3.17887e-05	0.00358668	Promoter (<=1kb)	chr1	82316579	82445367	128789	+	76867	uc007brq.3	0	ENSMUSG00000026142	Rhbdd1	rhomboid domain containing 1
99	chr1	82680696	82680748	53	*	0.000589609	0.775017	0.978334	-0.204676	Exon (uc007brv.1/12828, exon 32 of 52)	chr1	82724918	82752389	27472	+	75734	uc007brx.1	-44222	ENSMUSG00000026150	Mff	mitochondrial fission factor
100	chr1	82724978	82725034	57	*	1.87582e-06	4.029e-05	0.00639459	-0.00635446	Promoter (<=1kb)	chr1	82724918	82752389	27472	+	75734	uc007brx.1	116	ENSMUSG00000026150	Mff	mitochondrial fission factor
101	chr1	82725227	82725265	39	*	0.00248421	0.00175632	0.0708158	-0.0690595	Promoter (<=1kb)	chr1	82724918	82752389	27472	+	75734	uc007brx.1	347	ENSMUSG00000026150	Mff	mitochondrial fission factor
102	chr1	85793363	85793488	126	*	2.00675e-05	0.000452831	2.99695e-05	0.000423052	Promoter (<=1kb)	chr1	85793447	85851577	58131	+	12283	uc007bum.2	0	ENSMUSG00000036707	Cab39	calcium binding protein 39
103	chr1	86064761	86064805	45	*	5.76665e-13	0.377146	0.000616119	0.37653	Promoter (<=1kb)	chr1	86064619	86139295	74677	+	70247	uc007buy.1	186	ENSMUSG00000026229	Psmd1	proteasome (prosome, macropain) 26S subunit, non-ATPase, 1
104	chr1	86065159	86065159	1	*	0.000115496	3.47541e-05	0.000719193	-0.000684439	Promoter (<=1kb)	chr1	86064619	86139295	74677	+	70247	uc007buy.1	540	ENSMUSG00000026229	Psmd1	proteasome (prosome, macropain) 26S subunit, non-ATPase, 1
105	chr1	86487461	86487517	57	*	2.78873e-11	0.00704893	5.88477e-05	0.00699008	Distal Intergenic	chr1	86526736	86530698	3963	+	19231	uc007bvp.1	-39275	ENSMUSG00000026238	Ptma	prothymosin alpha
106	chr1	86487657	86487667	11	*	4.03212e-07	3.68299e-05	0.00284619	-0.00280936	Distal Intergenic	chr1	86526736	86530698	3963	+	19231	uc007bvp.1	-39079	ENSMUSG00000026238	Ptma	prothymosin alpha
107	chr1	86504177	86504259	83	*	2.51443e-12	0.383629	0.000863034	0.382602	Distal Intergenic	chr1	86526736	86530698	3963	+	19231	uc007bvp.1	-22559	ENSMUSG00000026238	Ptma	prothymosin alpha
108	chr1	86504373	86504373	1	*	2.18049e-06	0.00145149	3.36914e-05	0.0014178	Distal Intergenic	chr1	86526736	86530698	3963	+	19231	uc007bvp.1	-22363	ENSMUSG00000026238	Ptma	prothymosin alpha
109	chr1	86581993	86581993	1	*	0.000119797	0.00938344	0.000163026	0.00922041	Promoter (<=1kb)	chr1	86543015	86582501	39487	-	18582	uc007bvq.1	508	ENSMUSG00000026239	Pde6d	phosphodiesterase 6D, cGMP-specific, rod, delta
110	chr1	86582391	86582401	11	*	1.48398e-08	0.00189628	3.29674e-05	0.00186332	Promoter (<=1kb)	chr1	86543015	86582501	39487	-	18582	uc007bvq.1	100	ENSMUSG00000026239	Pde6d	phosphodiesterase 6D, cGMP-specific, rod, delta
111	chr1	86703949	86704043	95	*	6.00439e-13	0.384495	0.000670525	0.383824	Promoter (<=1kb)	chr1	86703804	87049195	345392	+	208718	uc007bvu.2	239	ENSMUSG00000053333	Dis3l2	DIS3 mitotic control homolog (S. cerevisiae)-like 2
112	chr1	88008384	88008463	80	*	1.85381e-05	3.07802e-05	0.00151357	-0.00147857	Promoter (<=1kb)	chr1	87945121	88008551	63431	-	227334	uc007bxw.1	88	ENSMUSG00000005501	Usp40	ubiquitin specific peptidase 40
113	chr1	88701783	88701806	24	*	5.07991e-05	3.21025e-05	0.0012485	-0.00121639	Promoter (<=1kb)	chr1	88698226	88702191	3966	-	320982	uc007byt.1	385	ENSMUSG00000049866	Arl4c	ADP-ribosylation factor-like 4C
114	chr1	88702041	88702094	54	*	7.83491e-07	4.50121e-05	0.0031648	-0.00311979	Promoter (<=1kb)	chr1	88698226	88702191	3966	-	320982	uc007byt.1	97	ENSMUSG00000049866	Arl4c	ADP-ribosylation factor-like 4C
115	chr1	88702331	88702383	53	*	2.62472e-08	0.382986	0.00391663	0.379086	Promoter (<=1kb)	chr1	88698226	88702191	3966	-	320982	uc007byt.1	-140	ENSMUSG00000049866	Arl4c	ADP-ribosylation factor-like 4C
116	chr1	89454748	89454886	139	*	3.79948e-06	3.06844e-05	0.00137665	-0.00134597	Promoter (<=1kb)	chr1	89454811	89895282	440472	+	347722	uc007byw.1	0	ENSMUSG00000055013	Agap1	ArfGAP with GTPase domain, ankyrin repeat and PH domain 1
117	chr1	89454920	89454925	6	*	4.9882e-09	0.384721	0.00335581	0.381365	Promoter (<=1kb)	chr1	89454811	89895282	440472	+	347722	uc007byw.1	114	ENSMUSG00000055013	Agap1	ArfGAP with GTPase domain, ankyrin repeat and PH domain 1
118	chr1	89454927	89454951	25	*	1.10726e-08	3.1085e-05	0.00295813	-0.00292699	Promoter (<=1kb)	chr1	89454811	89895282	440472	+	347722	uc007byw.1	140	ENSMUSG00000055013	Agap1	ArfGAP with GTPase domain, ankyrin repeat and PH domain 1
119	chr1	89454952	89454964	13	*	1.29259e-10	0.384823	0.00184278	0.382981	Promoter (<=1kb)	chr1	89454811	89895282	440472	+	347722	uc007byw.1	153	ENSMUSG00000055013	Agap1	ArfGAP with GTPase domain, ankyrin repeat and PH domain 1
120	chr1	89454965	89454979	15	*	0.000259645	3.08649e-05	0.000853454	-0.000822588	Promoter (<=1kb)	chr1	89454811	89895282	440472	+	347722	uc007byw.1	168	ENSMUSG00000055013	Agap1	ArfGAP with GTPase domain, ankyrin repeat and PH domain 1
121	chr1	89455064	89455094	31	*	9.76561e-05	0.000785884	3.15955e-05	0.000754289	Promoter (<=1kb)	chr1	89454811	89895282	440472	+	347722	uc007byw.1	283	ENSMUSG00000055013	Agap1	ArfGAP with GTPase domain, ankyrin repeat and PH domain 1
122	chr1	91398164	91398206	43	*	7.58788e-09	0.383861	0.00331524	0.380693	Promoter (<=1kb)	chr1	91373861	91398783	24923	-	67444	uc007cak.1	577	ENSMUSG00000026309	Ilkap	integrin-linked kinase-associated serine/threonine phosphatase 2C
123	chr1	92641728	92641819	92	*	3.12667e-05	4.14938e-05	0.0024698	-0.00242831	Promoter (<=1kb)	chr1	92637145	92641948	4804	-	66915	uc011wpj.1	129	ENSMUSG00000073616	Myeov2	myeloma overexpressed 2
124	chr1	92934421	92934424	4	*	7.83734e-08	0.00326571	4.82117e-05	0.0032175	Promoter (<=1kb)	chr1	92934408	92940972	6565	+	23830	uc007cbx.1	16	ENSMUSG00000026270	Capn10	calpain 10
125	chr1	93686205	93686301	97	*	2.5696e-05	0.00402153	8.03093e-05	0.00392723	Promoter (<=1kb)	chr1	93685694	93695762	10069	+	51800	uc007cee.1	607	ENSMUSG00000026278	Bok	BCL2-related ovarian killer
126	chr1	96334286	96334308	23	*	0.000131316	0.863967	0.991123	-0.125623	Distal Intergenic	chr1	95990659	96021758	31100	-	73454	uc029qsg.1	-312528	ENSMUSG00000100062	1700063A18Rik	RIKEN cDNA 1700063A18 gene
127	chr1	98095428	98095467	40	*	8.15533e-07	0.00202974	3.82943e-05	0.0019928	Promoter (<=1kb)	chr1	97821094	98095632	274539	-	18484	uc007cfo.1	165	ENSMUSG00000026335	Pam	peptidylglycine alpha-amidating monooxygenase
128	chr1	98095558	98095622	65	*	0.000126964	3.30423e-05	0.000809544	-0.000776575	Promoter (<=1kb)	chr1	97821094	98095632	274539	-	18484	uc007cfo.1	10	ENSMUSG00000026335	Pam	peptidylglycine alpha-amidating monooxygenase
129	chr1	98095679	98095679	1	*	0.00813779	0.0744233	0.00519561	0.0692277	Promoter (<=1kb)	chr1	97821094	98095632	274539	-	18484	uc007cfo.1	-47	ENSMUSG00000026335	Pam	peptidylglycine alpha-amidating monooxygenase
130	chr1	98452169	98452201	33	*	2.00876e-05	0.833757	0.557864	0.275893	Intron (uc007cfu.2/70866, intron 6 of 13)	chr1	98421124	98509380	88257	+	70866	uc007cfu.2	31077	ENSMUSG00000026336	Slco6d1	solute carrier organic anion transporter family, member 6d1
131	chr1	105664306	105664314	9	*	6.89638e-06	0.00302344	4.49032e-05	0.00297854	Promoter (<=1kb)	chr1	105663861	105665150	1290	+	227446	uc007cgi.2	453	ENSMUSG00000026319	2310035C23Rik	RIKEN cDNA 2310035C23 gene
132	chr1	105993908	105994038	131	*	2.58455e-11	0.383134	0.00137892	0.381774	Intron (uc007cgq.3/227449, intron 1 of 12)	chr1	105990406	106034079	43674	+	227449	uc007cgq.3	3632	ENSMUSG00000038866	Zcchc2	zinc finger, CCHC domain containing 2
133	chr1	106714368	106714554	187	*	1.30079e-06	0.00162977	3.41835e-05	0.00159482	Promoter (<=1kb)	chr1	106538178	106714290	176113	-	12043	uc007cgw.2	-78	ENSMUSG00000057329	Bcl2	B cell leukemia/lymphoma 2
134	chr1	106796244	106796244	1	*	4.8315e-11	0.384781	0.00130147	0.383479	Promoter (<=1kb)	chr1	106770788	106796725	25938	-	20479	uc007cgz.2	481	ENSMUSG00000009907	Vps4b	vacuolar protein sorting 4b (yeast)
135	chr1	106796350	106796578	229	*	1.03122e-06	0.00476395	7.59776e-05	0.00468428	Promoter (<=1kb)	chr1	106770788	106796725	25938	-	20479	uc007cgz.2	147	ENSMUSG00000009907	Vps4b	vacuolar protein sorting 4b (yeast)
136	chr1	119648497	119648614	118	*	4.67953e-11	0.00309383	3.37064e-05	0.00306106	Promoter (<=1kb)	chr1	119594824	119648617	53794	-	226352	uc007cix.2	3	ENSMUSG00000026383	Epb41l5	erythrocyte membrane protein band 4.1 like 5
137	chr1	119837203	119837250	48	*	2.98141e-09	0.3373	0.00162986	0.335618	Promoter (<=1kb)	chr1	119658093	119837071	178979	-	19258	uc007ciz.1	-132	ENSMUSG00000026384	Ptpn4	protein tyrosine phosphatase, non-receptor type 4
138	chr1	120265325	120265379	55	*	2.11782e-09	5.09529e-05	0.00818535	-0.00812461	Promoter (<=1kb)	chr1	120226416	120265280	38865	-	68428	uc007cji.1	-45	ENSMUSG00000026389	Steap3	STEAP family member 3
139	chr1	121327494	121327569	76	*	3.80012e-06	0.00313899	4.18199e-05	0.00309717	Promoter (<=1kb)	chr1	121304353	121327678	23326	-	72999	uc007cjo.1	109	ENSMUSG00000003721	Insig2	insulin induced gene 2
140	chr1	121327777	121327824	48	*	1.81287e-13	0.38233	0.000409723	0.381791	Promoter (<=1kb)	chr1	121304353	121327678	23326	-	72999	uc007cjo.1	-99	ENSMUSG00000003721	Insig2	insulin induced gene 2
141	chr1	121567633	121567706	74	*	7.85227e-09	0.380519	0.00309449	0.377614	Promoter (<=1kb)	chr1	121553835	121567980	14146	-	66942	uc007cjw.2	274	ENSMUSG00000001674	Ddx18	DEAD (Asp-Glu-Ala-Asp) box polypeptide 18
142	chr1	125435646	125435695	50	*	2.14862e-05	0.00119717	3.48399e-05	0.00116233	Promoter (<=1kb)	chr1	125392905	125435727	42823	-	74117	uc007cke.2	32	ENSMUSG00000026341	Actr3	ARP3 actin-related protein 3
143	chr1	128417054	128417091	38	*	1.34755e-05	0.0321513	0.000303167	0.0317944	Promoter (<=1kb)	chr1	128363707	128417416	53710	-	226414	uc007clp.2	325	ENSMUSG00000026356	Dars	aspartyl-tRNA synthetase
144	chr1	128417166	128417166	1	*	0.000142364	0.00397198	0.216807	-0.212835	Promoter (<=1kb)	chr1	128363707	128417416	53710	-	226414	uc007clp.2	250	ENSMUSG00000026356	Dars	aspartyl-tRNA synthetase
145	chr1	128592342	128592392	51	*	0.000215146	0.000523316	3.38636e-05	0.000489452	Promoter (<=1kb)	chr1	128588199	128592299	4101	-	12767	uc007clt.1	-43	ENSMUSG00000045382	Cxcr4	chemokine (C-X-C motif) receptor 4
146	chr1	131138058	131138058	1	*	1.53369e-07	2.97326e-05	0.00160913	-0.0015794	Promoter (<=1kb)	chr1	131128441	131138234	9794	-	226419	uc007cmw.1	176	ENSMUSG00000016526	Dyrk3	dual-specificity tyrosine-(Y)-phosphorylation regulated kinase 3
147	chr1	131138147	131138188	42	*	8.13731e-12	0.384456	0.00119033	0.383266	Promoter (<=1kb)	chr1	131128441	131138234	9794	-	226419	uc007cmw.1	46	ENSMUSG00000016526	Dyrk3	dual-specificity tyrosine-(Y)-phosphorylation regulated kinase 3
148	chr1	131528108	131528182	75	*	6.32627e-09	0.00593574	6.28027e-05	0.00587293	Promoter (<=1kb)	chr1	131527989	131539872	11884	+	108900	uc007cnk.1	193	ENSMUSG00000055184	Fam72a	family with sequence similarity 72, member A
149	chr1	131963086	131963175	90	*	7.10659e-05	3.21259e-05	0.000928628	-0.000898543	Promoter (<=1kb)	chr1	131962915	131982972	20058	+	212980	uc007cnz.2	260	ENSMUSG00000026435	Slc45a3	solute carrier family 45, member 3
150	chr1	132007577	132007870	294	*	6.84704e-06	0.0142186	0.000622133	0.0136171	Promoter (<=1kb)	chr1	132007605	132023838	16234	+	13714	uc007cob.1	0	ENSMUSG00000026436	Elk4	ELK4, member of ETS oncogene family
151	chr1	132417519	132417571	53	*	0.000438094	0.0376804	0.00256458	0.0351206	Promoter (<=1kb)	chr1	132417453	132449975	32523	+	213452	uc011wrw.1	118	ENSMUSG00000042046	Dstyk	dual serine/threonine and tyrosine protein kinase
152	chr1	132417723	132417729	7	*	1.45994e-06	0.00117771	3.1639e-05	0.00114607	Promoter (<=1kb)	chr1	132417453	132449975	32523	+	213452	uc011wrw.1	276	ENSMUSG00000042046	Dstyk	dual serine/threonine and tyrosine protein kinase
153	chr1	132417825	132417825	1	*	0.00750467	0.00446829	0.0796372	-0.0751689	Promoter (<=1kb)	chr1	132417453	132449975	32523	+	213452	uc011wrw.1	372	ENSMUSG00000042046	Dstyk	dual serine/threonine and tyrosine protein kinase
154	chr1	132881284	132881284	1	*	2.39329e-06	0.000615445	3.93265e-05	0.000576118	Promoter (<=1kb)	chr1	132880355	132940005	59651	+	16980	uc007cpi.2	929	ENSMUSG00000026443	Lrrn2	leucine rich repeat protein 2, neuronal
155	chr1	133045852	133045933	82	*	0.000122645	4.24652e-05	0.00133661	-0.00129415	Promoter (<=1kb)	chr1	133046012	133068033	22022	+	240752	uc007cpq.1	-160	ENSMUSG00000026447	Pik3c2b	phosphoinositide-3-kinase, class 2, beta polypeptide
156	chr1	133305053	133305054	2	*	0.000262928	0.785353	0.86707	-0.0817174	Downstream (1-2kb)	chr1	133309823	133329722	19900	+	280287	uc007cqb.1	-4770	ENSMUSG00000102367	Kiss1	KiSS-1 metastasis-suppressor
157	chr1	133423586	133423653	68	*	2.24549e-07	0.0116394	0.00010805	0.0115725	Promoter (<=1kb)	chr1	133382300	133424212	41913	-	20668	uc007cqk.1	559	ENSMUSG00000070643	Sox13	SRY (sex determining region Y)-box 13
158	chr1	134361593	134361598	6	*	0.00146601	3.06089e-05	0.000314929	-0.00028432	Promoter (<=1kb)	chr1	134346097	134361999	15903	-	57439	uc007crq.1	401	ENSMUSG00000042305	Tmem183a	transmembrane protein 183A
159	chr1	134361967	134362027	61	*	4.7877e-05	0.000587906	3.10153e-05	0.000556891	Promoter (<=1kb)	chr1	134346097	134361999	15903	-	57439	uc007crq.1	0	ENSMUSG00000042305	Tmem183a	transmembrane protein 183A
160	chr1	134405698	134405738	41	*	9.87916e-05	4.85285e-05	0.00162939	-0.00158086	Promoter (<=1kb)	chr1	134405990	134411738	5749	+	72017	uc007cru.1	-292	ENSMUSG00000026456	Cyb5r1	cytochrome b5 reductase 1
161	chr1	135147086	135147245	160	*	1.20302e-05	0.00190001	3.93398e-05	0.00186068	Promoter (<=1kb)	chr1	135146834	135156268	9435	+	68724	uc007csu.1	411	ENSMUSG00000026426	Arl8a	ADP-ribosylation factor-like 8A
162	chr1	135147415	135147478	64	*	2.28814e-08	0.378393	0.00528323	0.372474	Promoter (<=1kb)	chr1	135146834	135156268	9435	+	68724	uc007csu.1	644	ENSMUSG00000026426	Arl8a	ADP-ribosylation factor-like 8A
163	chr1	135374982	135375063	82	*	0.000371425	0.00970127	0.000255326	0.00944594	Promoter (<=1kb)	chr1	135371456	135375063	3608	-	77552	uc007ctc.1	0	ENSMUSG00000041889	Shisa4	shisa family member 4
164	chr1	135430245	135430245	1	*	0.00265499	3.65833e-05	0.000353703	-0.00031712	Promoter (<=1kb)	chr1	135382315	135430491	48177	-	226432	uc007cte.1	246	ENSMUSG00000041879	Ipo9	importin 9
165	chr1	135430309	135430359	51	*	8.59812e-12	0.380397	0.000966832	0.379416	Promoter (<=1kb)	chr1	135382315	135430491	48177	-	226432	uc007cte.1	132	ENSMUSG00000041879	Ipo9	importin 9
166	chr1	135430470	135430496	27	*	0.000703797	2.97552e-05	0.000343989	-0.000314233	Promoter (<=1kb)	chr1	135382315	135430491	48177	-	226432	uc007cte.1	0	ENSMUSG00000041879	Ipo9	importin 9
167	chr1	135729115	135729229	115	*	6.69033e-06	3.66333e-05	0.0025275	-0.0024973	Promoter (<=1kb)	chr1	135729197	135752229	23033	+	13007	uc007cto.1	0	ENSMUSG00000026421	Csrp1	cysteine and glycine-rich protein 1
168	chr1	135729378	135729378	1	*	6.96222e-12	0.384338	0.00088841	0.38345	Promoter (<=1kb)	chr1	135729197	135752229	23033	+	13007	uc007cto.1	181	ENSMUSG00000026421	Csrp1	cysteine and glycine-rich protein 1
169	chr1	136131418	136131465	48	*	9.23357e-05	0.000260717	0.0187712	-0.0185105	Promoter (<=1kb)	chr1	136131401	136178014	46614	+	16565	uc007cul.1	64	ENSMUSG00000041642	Kif21b	kinesin family member 21B
170	chr1	136131504	136131579	76	*	2.18162e-12	0.384946	0.000770106	0.384156	Promoter (<=1kb)	chr1	136131401	136178014	46614	+	16565	uc007cul.1	178	ENSMUSG00000041642	Kif21b	kinesin family member 21B
171	chr1	136586154	136586155	2	*	4.37228e-05	0.999092	0.975567	0.0235246	Distal Intergenic	chr1	136624901	136630391	5491	+	226442	uc007cuw.2	-38747	ENSMUSG00000041483	Zfp281	zinc finger protein 281
172	chr1	136625264	136625449	186	*	1.71843e-08	0.381045	0.00327069	0.377706	Promoter (<=1kb)	chr1	136624901	136630391	5491	+	226442	uc007cuw.2	548	ENSMUSG00000041483	Zfp281	zinc finger protein 281
173	chr1	138227672	138227788	117	*	0.000288247	0.914734	0.991349	-0.0750268	Distal Intergenic	chr1	138273738	138289462	15725	+	338375	uc007cvm.1	-46066	ENSMUSG00000026394	Atp6v1g3	ATPase, H+ transporting, lysosomal V1 subunit G3
174	chr1	138619773	138619856	84	*	3.23444e-10	0.00749315	4.68082e-05	0.00744935	Promoter (<=1kb)	chr1	138484714	138619696	134983	-	59125	uc007cvn.1	-77	ENSMUSG00000026393	Nek7	NIMA (never in mitosis gene a)-related expressed kinase 7
175	chr1	138856780	138856824	45	*	3.35072e-10	0.381902	0.00147434	0.380428	Promoter (<=1kb)	chr1	138851979	138856854	4876	-	69549	uc007cvw.1	30	ENSMUSG00000079283	2310009B15Rik	RIKEN cDNA 2310009B15 gene
176	chr1	138963766	138963920	155	*	1.01758e-05	0.000958031	3.13945e-05	0.000926424	Promoter (<=1kb)	chr1	138963709	139063715	100007	+	329260	uc007cvy.2	211	ENSMUSG00000056268	Dennd1b	DENN/MADD domain containing 1B
177	chr1	138964058	138964066	9	*	0.000240021	0.00650004	0.336432	-0.329932	Promoter (<=1kb)	chr1	138963709	139063715	100007	+	329260	uc007cvy.2	357	ENSMUSG00000056268	Dennd1b	DENN/MADD domain containing 1B
178	chr1	138964070	138964070	1	*	8.18772e-05	0.00861043	0.000127351	0.00848308	Promoter (<=1kb)	chr1	138963709	139063715	100007	+	329260	uc007cvy.2	361	ENSMUSG00000056268	Dennd1b	DENN/MADD domain containing 1B
179	chr1	138964085	138964093	9	*	0.000369519	0.0105995	0.361753	-0.351153	Promoter (<=1kb)	chr1	138963709	139063715	100007	+	329260	uc007cvy.2	384	ENSMUSG00000056268	Dennd1b	DENN/MADD domain containing 1B
180	chr1	139422337	139422401	65	*	0.000112796	2.98595e-05	0.000649387	-0.000619527	Promoter (<=1kb)	chr1	139422383	139453007	30625	+	226470	uc007cwg.2	0	ENSMUSG00000033964	Zbtb41	zinc finger and BTB domain containing 41 homolog
181	chr1	139942629	139942629	1	*	0.00159673	0.885378	0.987053	-0.101675	Intron (uc007cwq.1/545366, intron 9 of 9)	chr1	139810292	140018921	208630	-	545366	uc007cwq.1	76292	ENSMUSG00000033898	Cfhr2	complement factor H-related 2
182	chr1	143777264	143777566	303	*	3.07752e-05	3.10042e-05	0.00158061	-0.00154806	Promoter (<=1kb)	chr1	143777278	143807466	30189	+	56207	uc007cxe.2	0	ENSMUSG00000018189	Uchl5	ubiquitin carboxyl-terminal esterase L5
183	chr1	146822495	146822527	33	*	0.000420781	0.829801	0.979782	-0.150313	Intron (uc007cxo.2/215378, intron 6 of 7)	chr1	146497738	146517554	19817	+	215378	uc007cxr.1	324789	ENSMUSG00000035131	Brinp3	bone morphogenetic protein/retinoic acid inducible neural specific 3
184	chr1	151499980	151499980	1	*	0.000543504	0.00266128	0.000104015	0.00255726	Promoter (<=1kb)	chr1	151469406	151500823	31418	-	19821	uc007cyx.1	843	ENSMUSG00000026484	Rnf2	ring finger protein 2
185	chr1	151500331	151500474	144	*	3.99823e-05	3.62069e-05	0.00215702	-0.00212082	Promoter (<=1kb)	chr1	151469406	151500823	31418	-	19821	uc007cyx.1	349	ENSMUSG00000026484	Rnf2	ring finger protein 2
186	chr1	151500628	151500693	66	*	1.17499e-05	3.3105e-05	0.00176979	-0.00173669	Promoter (<=1kb)	chr1	151469406	151500823	31418	-	19821	uc007cyx.1	130	ENSMUSG00000026484	Rnf2	ring finger protein 2
187	chr1	151501094	151501105	12	*	1.61265e-05	0.0200129	0.000226279	0.0197866	Promoter (<=1kb)	chr1	151469406	151500823	31418	-	19821	uc007cyx.1	-271	ENSMUSG00000026484	Rnf2	ring finger protein 2
188	chr1	152386649	152386697	49	*	0.000260569	3.00237e-05	0.000537339	-0.000507147	Promoter (<=1kb)	chr1	152370736	152386682	15947	-	66637	uc007czf.2	0	ENSMUSG00000014980	Tsen15	tRNA splicing endonuclease 15 homolog (S. cerevisiae)
189	chr1	152766172	152766249	78	*	1.03771e-14	0.384422	0.000362111	0.38406	Promoter (<=1kb)	chr1	152766542	152775580	9039	+	67771	uc007czj.2	-370	ENSMUSG00000008475	Arpc5	actin related protein 2/3 complex, subunit 5
190	chr1	152766471	152766519	49	*	0.00026454	0.000577052	0.00675064	-0.00617359	Promoter (<=1kb)	chr1	152766542	152775580	9039	+	67771	uc007czj.2	-71	ENSMUSG00000008475	Arpc5	actin related protein 2/3 complex, subunit 5
191	chr1	152766613	152766672	60	*	4.94381e-14	0.384245	0.000326157	0.383785	Promoter (<=1kb)	chr1	152766542	152775580	9039	+	67771	uc007czj.2	130	ENSMUSG00000008475	Arpc5	actin related protein 2/3 complex, subunit 5
192	chr1	152902874	152902950	77	*	6.54101e-05	0.000697133	3.19965e-05	0.000665137	Promoter (<=1kb)	chr1	152836995	152902646	65652	-	226517	uc007czo.2	-228	ENSMUSG00000042772	Smg7	Smg-7 homolog, nonsense mediated mRNA decay factor (C. elegans)
193	chr1	152903190	152903211	22	*	2.77974e-06	8.68324e-05	0.00816141	-0.00807042	Promoter (<=1kb)	chr1	152836995	152902646	65652	-	226517	uc007czo.2	-544	ENSMUSG00000042772	Smg7	Smg-7 homolog, nonsense mediated mRNA decay factor (C. elegans)
194	chr1	153487377	153487431	55	*	5.56934e-11	0.00317283	3.76783e-05	0.00313587	Promoter (<=1kb)	chr1	153455758	153487660	31903	-	13211	uc007czy.1	229	ENSMUSG00000042699	Dhx9	DEAH (Asp-Glu-Ala-His) box polypeptide 9
195	chr1	155098785	155098785	1	*	0.000100604	0.00107071	4.25626e-05	0.00102815	Promoter (<=1kb)	chr1	155096367	155099636	3270	-	15939	uc007dax.2	851	ENSMUSG00000056708	Ier5	immediate early response 5
196	chr1	155098978	155099101	124	*	2.42534e-11	0.00486503	4.09549e-05	0.00480434	Promoter (<=1kb)	chr1	155096367	155099636	3270	-	15939	uc007dax.2	535	ENSMUSG00000056708	Ier5	immediate early response 5
197	chr1	155417039	155417107	69	*	3.92997e-06	0.362954	0.00623499	0.356167	Promoter (<=1kb)	chr1	155275657	155417444	141788	-	19775	uc007dbf.1	337	ENSMUSG00000026469	Xpr1	xenotropic and polytropic retrovirus receptor 1
198	chr1	156674209	156674268	60	*	4.62338e-07	3.22137e-05	0.00182394	-0.00179172	Promoter (<=1kb)	chr1	156653617	156674339	20723	-	30935	uc007dcn.2	71	ENSMUSG00000060519	Tor3a	torsin family 3, member A
199	chr1	156674459	156674481	23	*	2.14299e-06	0.00310592	4.85536e-05	0.00305737	Promoter (<=1kb)	chr1	156653617	156674339	20723	-	30935	uc007dcn.2	-120	ENSMUSG00000060519	Tor3a	torsin family 3, member A
200	chr1	156939257	156939304	48	*	1.84539e-08	0.00243193	3.57566e-05	0.00239617	Promoter (<=1kb)	chr1	156804166	156939387	135222	-	78255	uc011wui.1	83	ENSMUSG00000026594	Ralgps2	Ral GEF with PH domain and SH3 binding motif 2
201	chr1	156939387	156939421	35	*	0.000203783	3.42093e-05	0.00129741	-0.00126322	Promoter (<=1kb)	chr1	156804166	156939387	135222	-	78255	uc011wui.1	0	ENSMUSG00000026594	Ralgps2	Ral GEF with PH domain and SH3 binding motif 2
202	chr1	157412202	157412330	129	*	7.54005e-07	3.13864e-05	0.00121098	-0.00118003	Promoter (<=1kb)	chr1	157412352	157420236	7885	+	69953	uc007ddi.1	-150	ENSMUSG00000049881	2810025M15Rik	RIKEN cDNA 2810025M15 gene
203	chr1	160792690	160792723	34	*	1.83339e-06	3.01753e-05	0.000731163	-0.000700987	Promoter (<=1kb)	chr1	160256572	160792938	536367	-	29809	uc007dej.2	215	ENSMUSG00000026721	Rabgap1l	RAB GTPase activating protein 1-like
204	chr1	160792859	160792859	1	*	9.47999e-05	0.00195488	0.158781	-0.156826	Promoter (<=1kb)	chr1	160256572	160792938	536367	-	29809	uc007dej.2	79	ENSMUSG00000026721	Rabgap1l	RAB GTPase activating protein 1-like
205	chr1	160792934	160792969	36	*	1.81492e-07	0.00659166	6.74021e-05	0.00652426	Promoter (<=1kb)	chr1	160256572	160792938	536367	-	29809	uc007dej.2	0	ENSMUSG00000026721	Rabgap1l	RAB GTPase activating protein 1-like
206	chr1	162570821	162570851	31	*	6.79536e-06	0.00107746	3.65825e-05	0.00104088	Promoter (<=1kb)	chr1	162570828	162599078	28251	+	53330	uc007dgl.1	0	ENSMUSG00000026696	Vamp4	vesicle-associated membrane protein 4
207	chr1	162570957	162570961	5	*	0.000190792	0.0022802	7.46807e-05	0.00220552	Promoter (<=1kb)	chr1	162570828	162599078	28251	+	53330	uc007dgl.1	133	ENSMUSG00000026696	Vamp4	vesicle-associated membrane protein 4
208	chr1	162740553	162740598	46	*	1.54353e-11	0.383404	0.000970831	0.382433	Promoter (<=1kb)	chr1	162671785	162740556	68772	-	226562	uc007dgr.1	0	ENSMUSG00000040225	Prrc2c	proline-rich coiled-coil 2C
209	chr1	163403763	163403783	21	*	0.00202369	0.0354899	0.00394844	0.0315415	Promoter (<=1kb)	chr1	163384909	163403641	18733	-	98376	uc007dhl.1	-122	ENSMUSG00000040124	Gorab	golgin, RAB6-interacting
210	chr1	163930200	163930233	34	*	2.63157e-05	0.00189388	4.27896e-05	0.00185001	Promoter (<=1kb)	chr1	163929765	163955126	25362	+	240880	uc007dhq.2	468	ENSMUSG00000026584	Scyl3	SCY1-like 3 (S. cerevisiae)
211	chr1	163930334	163930385	52	*	1.53256e-05	0.00151877	3.55075e-05	0.00148326	Promoter (<=1kb)	chr1	163929765	163955126	25362	+	240880	uc007dhq.2	620	ENSMUSG00000026584	Scyl3	SCY1-like 3 (S. cerevisiae)
212	chr1	164249074	164249106	33	*	5.75909e-06	0.00135688	3.18055e-05	0.00132536	Promoter (<=1kb)	chr1	164249046	164265385	16340	+	116914	uc007did.2	60	ENSMUSG00000040918	Slc19a2	solute carrier family 19 (thiamine transporter), member 2
213	chr1	164249351	164249432	82	*	1.80581e-06	0.00174466	3.7398e-05	0.00170791	Promoter (<=1kb)	chr1	164249046	164265385	16340	+	116914	uc007did.2	386	ENSMUSG00000040918	Slc19a2	solute carrier family 19 (thiamine transporter), member 2
214	chr1	165281806	165281887	82	*	6.39589e-05	0.00350907	0.222065	-0.218556	Distal Intergenic	chr1	165295766	165321851	26086	+	240888	uc007dja.1	-13960	ENSMUSG00000040836	Gpr161	G protein-coupled receptor 161
215	chr1	165281920	165281953	34	*	7.15924e-05	0.000718728	3.26022e-05	0.000686125	Distal Intergenic	chr1	165295766	165321851	26086	+	240888	uc007dja.1	-13846	ENSMUSG00000040836	Gpr161	G protein-coupled receptor 161
216	chr1	167269670	167269676	7	*	0.000421318	4.67226e-05	0.00162188	-0.00157516	Intron (uc007dku.2/80914, intron 6 of 6)	chr1	167226084	167285127	59044	-	80914	uc007dku.2	15451	ENSMUSG00000026558	Uck2	uridine-cytidine kinase 2
217	chr1	167308784	167308846	63	*	1.73449e-08	0.00448731	4.04707e-05	0.0044466	Promoter (<=1kb)	chr1	167308670	167333978	25309	+	68944	uc007dkv.1	176	ENSMUSG00000052428	Tmco1	transmembrane and coiled-coil domains 1
218	chr1	171065944	171065954	11	*	0.000235932	0.681113	0.0476141	0.634021	Promoter (1-2kb)	chr1	171064591	171064652	62	-	102466998	uc033fnc.1	-1292	ENSMUSG00000099119	Mir6546	microRNA 6546
219	chr1	171102558	171102621	64	*	0.000185912	0.00146552	5.77974e-05	0.00140772	Distal Intergenic	chr1	171121661	171126967	5307	+	75472	uc007dna.1	-19103	ENSMUSG00000026649	Cfap126	cilia and flagella associated protein 126
220	chr1	171270199	171270245	47	*	6.10911e-05	0.0014843	4.4186e-05	0.00144011	Promoter (<=1kb)	chr1	171270328	171276895	6568	+	57370	uc007dnp.2	-129	ENSMUSG00000052423	B4galt3	UDP-Gal:betaGlcNAc beta 1,4-galactosyltransferase, polypeptide 3
221	chr1	171294471	171294471	1	*	0.00254081	2.96985e-05	0.000220905	-0.000191207	Promoter (<=1kb)	chr1	171288564	171294982	6419	-	66155	uc007dnw.1	511	ENSMUSG00000062963	Ufc1	ubiquitin-fold modifier conjugating enzyme 1
222	chr1	171294572	171294697	126	*	5.1181e-05	0.00195153	4.8333e-05	0.00191942	Promoter (<=1kb)	chr1	171288564	171294982	6419	-	66155	uc007dnw.1	285	ENSMUSG00000062963	Ufc1	ubiquitin-fold modifier conjugating enzyme 1
223	chr1	171294953	171294954	2	*	1.93577e-09	0.368755	0.00175005	0.367005	Promoter (<=1kb)	chr1	171288564	171294982	6419	-	66155	uc007dnw.1	28	ENSMUSG00000062963	Ufc1	ubiquitin-fold modifier conjugating enzyme 1
224	chr1	171294986	171294986	1	*	0.000453239	0.00014041	0.00558729	-0.00544688	Promoter (<=1kb)	chr1	171288564	171294982	6419	-	66155	uc007dnw.1	-4	ENSMUSG00000062963	Ufc1	ubiquitin-fold modifier conjugating enzyme 1
225	chr1	172023579	172023600	22	*	1.83511e-08	0.85036	0.656343	0.19613	Intron (uc007dpi.1/93840, intron 7 of 7)	chr1	172004371	172028045	23675	-	93840	uc007dpi.1	4445	ENSMUSG00000026556	Vangl2	vang-like 2 (van gogh, Drosophila)
226	chr1	172148063	172148064	2	*	8.17188e-05	6.66432e-05	0.00246647	-0.00239982	Promoter (<=1kb)	chr1	172148015	172173430	25416	+	98193	uc007dpr.2	49	ENSMUSG00000026554	Dcaf8	DDB1 and CUL4 associated factor 8
227	chr1	172148353	172148405	53	*	8.75867e-06	0.00295342	6.16874e-05	0.00289173	Promoter (<=1kb)	chr1	172148178	172196393	48216	+	98193	uc007dpx.2	227	ENSMUSG00000026554	Dcaf8	DDB1 and CUL4 associated factor 8
228	chr1	172148598	172148599	2	*	0.00104328	0.334659	0.0198753	0.314784	Promoter (<=1kb)	chr1	172148178	172196393	48216	+	98193	uc007dpx.2	421	ENSMUSG00000026554	Dcaf8	DDB1 and CUL4 associated factor 8
229	chr1	172376514	172376674	161	*	1.66029e-06	3.83382e-05	0.00301486	-0.00297441	Promoter (<=1kb)	chr1	172376531	172384099	7569	+	67556	uc007dqk.2	0	ENSMUSG00000050229	Pigm	phosphatidylinositol glycan anchor biosynthesis, class M
230	chr1	172376687	172376693	7	*	1.51421e-06	0.00266179	4.31755e-05	0.00261862	Promoter (<=1kb)	chr1	172376531	172384099	7569	+	67556	uc007dqk.2	162	ENSMUSG00000050229	Pigm	phosphatidylinositol glycan anchor biosynthesis, class M
231	chr1	175692158	175692200	43	*	6.79072e-05	0.350821	0.0113156	0.339506	Promoter (<=1kb)	chr1	175662421	175692632	30212	-	13603	uc007dtq.2	432	ENSMUSG00000026525	Opn3	opsin 3
232	chr1	175880837	175881066	230	*	2.33312e-11	0.38224	0.00103259	0.381177	Promoter (<=1kb)	chr1	175880778	175911396	30619	+	26909	uc007dtu.2	288	ENSMUSG00000039748	Exo1	exonuclease 1
233	chr1	176814813	176814890	78	*	1.95732e-07	0.367882	0.0038835	0.363998	Promoter (<=1kb)	chr1	176814660	176845497	30838	+	76816	uc007duh.2	230	ENSMUSG00000026504	Sdccag8	serologically defined colon cancer antigen 8
234	chr1	177442919	177443021	103	*	3.83244e-06	0.00127768	3.5851e-05	0.00124178	Promoter (<=1kb)	chr1	177442407	177450764	8358	+	30928	uc007dul.2	614	ENSMUSG00000063659	Zbtb18	zinc finger and BTB domain containing 18
235	chr1	177795897	177795986	90	*	2.19355e-156	3.12975e-05	0.0110412	-0.0110099	Promoter (<=1kb)	chr1	177763178	177796509	33332	-	11566	uc007dut.1	523	ENSMUSG00000015961	Adss	adenylosuccinate synthetase, non muscle
236	chr1	177796175	177796226	52	*	4.87261e-06	0.00149566	3.76125e-05	0.00145748	Promoter (<=1kb)	chr1	177763178	177796509	33332	-	11566	uc007dut.1	283	ENSMUSG00000015961	Adss	adenylosuccinate synthetase, non muscle
237	chr1	177796483	177796555	73	*	6.50495e-05	3.22522e-05	0.00113511	-0.00110254	Promoter (<=1kb)	chr1	177763178	177796509	33332	-	11566	uc007dut.1	0	ENSMUSG00000015961	Adss	adenylosuccinate synthetase, non muscle
238	chr1	178337003	178337115	113	*	0.00102821	0.0702704	0.00513116	0.064896	Promoter (<=1kb)	chr1	178322166	178337784	15619	-	51810	uc007dvb.2	669	ENSMUSG00000039630	Hnrnpu	heterogeneous nuclear ribonucleoprotein U
239	chr1	179546050	179546103	54	*	0.00071733	2.98434e-05	0.000370239	-0.000340396	Promoter (<=1kb)	chr1	179528056	179546267	18212	-	15278	uc007dvl.1	164	ENSMUSG00000026492	Tfb2m	transcription factor B2, mitochondrial
240	chr1	179546523	179546523	1	*	0.00405947	0.000152188	3.01077e-05	0.00012208	Promoter (<=1kb)	chr1	179546529	179582936	36408	+	226744	uc007dvm.1	-6	ENSMUSG00000038949	Cnst	consortin, connexin sorting protein
241	chr1	179546650	179546833	184	*	1.34818e-05	0.000566121	2.99922e-05	0.000536177	Promoter (<=1kb)	chr1	179546529	179582936	36408	+	226744	uc007dvm.1	304	ENSMUSG00000038949	Cnst	consortin, connexin sorting protein
242	chr1	179960398	179960446	49	*	0.000190801	0.0165572	0.000705019	0.0158522	Promoter (<=1kb)	chr1	179961089	180101272	140184	+	226751	uc007dvs.2	-691	ENSMUSG00000026490	Cdc42bpa	CDC42 binding protein kinase alpha
243	chr1	180003338	180003338	1	*	1.91915e-05	0.490165	0.970342	-0.480177	Intron (uc007dvs.2/226751, intron 2 of 14)	chr1	179961089	180101272	140184	+	226751	uc007dvs.2	42249	ENSMUSG00000026490	Cdc42bpa	CDC42 binding protein kinase alpha
244	chr1	180330606	180330640	35	*	2.58319e-11	0.381816	0.00107395	0.380742	Promoter (<=1kb)	chr1	180326969	180330549	3581	-	277333	uc007dwf.1	-57	#N/A	Gm5069	glyceraldehyde-3-phosphate dehydrogenase pseudogene
245	chr1	180330936	180330983	48	*	1.17732e-07	0.00549171	5.07315e-05	0.00544863	Promoter (<=1kb)	chr1	180326969	180330549	3581	-	277333	uc007dwf.1	-387	#N/A	Gm5069	glyceraldehyde-3-phosphate dehydrogenase pseudogene
246	chr1	180331116	180331218	103	*	3.3229e-05	5.99622e-05	0.00358916	-0.0035292	Promoter (<=1kb)	chr1	180326969	180330549	3581	-	277333	uc007dwf.1	-567	#N/A	Gm5069	glyceraldehyde-3-phosphate dehydrogenase pseudogene
247	chr1	180569249	180569279	31	*	2.49907e-07	0.261973	0.00204111	0.259931	Promoter (<=1kb)	chr1	180568975	180601254	32280	+	11545	uc007dwi.1	304	ENSMUSG00000026496	Parp1	poly (ADP-ribose) polymerase family, member 1
248	chr1	180778085	180778129	45	*	1.0254e-08	0.00973003	5.54192e-05	0.00967315	Distal Intergenic	chr1	180802568	180813603	11036	-	15078	uc007dwr.1	35474	ENSMUSG00000060743	H3f3a	H3 histone, family 3A
249	chr1	180813072	180813140	69	*	0.000117063	0.000871233	3.77457e-05	0.00083339	Promoter (<=1kb)	chr1	180802568	180813603	11036	-	15078	uc007dwr.1	463	ENSMUSG00000060743	H3f3a	H3 histone, family 3A
250	chr1	180813160	180813213	54	*	7.92182e-06	3.81993e-05	0.00172214	-0.00168434	Promoter (<=1kb)	chr1	180802568	180813603	11036	-	15078	uc007dwr.1	390	ENSMUSG00000060743	H3f3a	H3 histone, family 3A
251	chr1	180850805	180850820	16	*	1.22161e-09	0.00748176	3.88136e-05	0.00744294	Promoter (<=1kb)	chr1	180851151	180868114	16964	+	208768	uc007dwt.1	-346	ENSMUSG00000038806	Sde2	SDE2 telomere maintenance homolog (S. pombe)
252	chr1	181143974	181144013	40	*	2.73662e-07	3.06923e-05	0.00174121	-0.00171052	Promoter (<=1kb)	chr1	181093423	181144157	50735	-	67459	uc007dxb.1	144	ENSMUSG00000026516	Nvl	nuclear VCP-like
253	chr1	181151195	181151253	59	*	1.4782e-11	0.00871157	3.91322e-05	0.00867244	Promoter (<=1kb)	chr1	181150931	181168994	18064	+	98417	uc007dxe.2	322	ENSMUSG00000062169	Cnih4	cornichon homolog 4 (Drosophila)
254	chr1	181210984	181210984	1	*	0.000210566	0.0071614	0.00015343	0.00700797	Promoter (<=1kb)	chr1	181173226	181211978	38753	-	226757	uc007dxf.2	994	ENSMUSG00000038733	Wdr26	WD repeat domain 26
255	chr1	181212150	181212173	24	*	1.38174e-09	0.378758	0.0018207	0.376904	Promoter (<=1kb)	chr1	181173226	181211978	38753	-	226757	uc007dxf.2	-172	ENSMUSG00000038733	Wdr26	WD repeat domain 26
256	chr1	181212174	181212253	80	*	1.74512e-05	0.00112024	0.14612	-0.145	Promoter (<=1kb)	chr1	181173226	181211978	38753	-	226757	uc007dxf.2	-196	ENSMUSG00000038733	Wdr26	WD repeat domain 26
257	chr1	181212295	181212296	2	*	3.54358e-05	0.00312759	8.29549e-05	0.00304463	Promoter (<=1kb)	chr1	181173226	181211978	38753	-	226757	uc007dxf.2	-317	ENSMUSG00000038733	Wdr26	WD repeat domain 26
258	chr1	182124937	182125007	71	*	4.59954e-05	3.39798e-05	0.00130088	-0.0012666	Promoter (<=1kb)	chr1	182124737	182132415	7679	+	27058	uc007dxu.2	270	ENSMUSG00000026511	Srp9	signal recognition particle 9
259	chr1	182125026	182125163	138	*	4.63997e-09	0.375597	0.000860195	0.373311	Promoter (<=1kb)	chr1	182124737	182132415	7679	+	27058	uc007dxu.2	426	ENSMUSG00000026511	Srp9	signal recognition particle 9
260	chr1	182517191	182517258	68	*	1.54366e-09	0.00388831	4.73161e-05	0.00384099	Promoter (<=1kb)	chr1	182467259	182517483	50225	-	12334	uc007dye.2	225	ENSMUSG00000026509	Capn2	calpain 2
261	chr1	183357372	183357406	35	*	0.000156528	0.878956	0.938715	-0.059913	Exon (uc008icw.1/338366, exon 4 of 27)	chr1	183343761	183354042	10282	-	338366	uc008icy.1	-3330	#N/A	Mia3	melanoma inhibitory activity 3
262	chr1	183369253	183369301	49	*	1.15047e-09	0.383763	0.00196175	0.381802	Promoter (<=1kb)	chr1	183326236	183369565	43330	-	338366	uc008icw.1	264	#N/A	Mia3	melanoma inhibitory activity 3
263	chr1	183369467	183369493	27	*	5.05559e-08	0.375094	0.00316918	0.371925	Promoter (<=1kb)	chr1	183326236	183369565	43330	-	338366	uc008icw.1	72	#N/A	Mia3	melanoma inhibitory activity 3
264	chr1	184727393	184727437	45	*	7.9701e-05	0.759242	0.841742	-0.0827774	3' UTR	chr1	184727145	184732493	5349	-	15284	uc007dyn.2	5056	ENSMUSG00000039377	Hlx	H2.0-like homeobox
265	chr1	185204116	185204226	111	*	1.82231e-12	0.384371	0.000731711	0.383562	Promoter (<=1kb)	chr1	185204168	185286746	82579	+	98732	uc007dyu.2	0	ENSMUSG00000039318	Rab3gap2	RAB3 GTPase activating protein subunit 2
266	chr1	185328945	185328987	43	*	7.01614e-05	0.00259671	7.74144e-05	0.0025193	Promoter (<=1kb)	chr1	185286662	185329401	42740	-	381314	uc007dyz.1	414	ENSMUSG00000026618	Iars2	isoleucine-tRNA synthetase 2, mitochondrial
267	chr1	185329044	185329044	1	*	0.00496795	0.00914943	0.178409	-0.169259	Promoter (<=1kb)	chr1	185286662	185329401	42740	-	381314	uc007dyz.1	357	ENSMUSG00000026618	Iars2	isoleucine-tRNA synthetase 2, mitochondrial
268	chr1	185329294	185329438	145	*	1.33643e-07	4.72578e-05	0.0110788	-0.0110316	Promoter (<=1kb)	chr1	185286662	185329401	42740	-	381314	uc007dyz.1	0	ENSMUSG00000026618	Iars2	isoleucine-tRNA synthetase 2, mitochondrial
269	chr1	185332109	185332207	99	*	3.91879e-14	0.384934	0.000434267	0.384481	Promoter (<=1kb)	chr1	185332159	185357769	25611	+	23827	uc007dzc.1	0	ENSMUSG00000026617	Bpnt1	bisphosphate 3'-nucleotidase 1
270	chr1	187600938	187600938	1	*	0.000373875	0.948505	0.919821	0.0286839	Distal Intergenic	chr1	187609006	188214884	605879	+	26381	uc007eaa.2	-8068	ENSMUSG00000026610	Esrrg	estrogen-related receptor gamma
271	chr1	190169421	190169488	68	*	1.07748e-05	0.332744	0.0083166	0.324427	Promoter (<=1kb)	chr1	190160522	190169399	8878	-	19130	uc007ebc.2	-22	ENSMUSG00000010175	Prox1	prospero homeobox 1
272	chr1	190169730	190169730	1	*	0.0012985	0.0165789	0.00126773	0.0153111	Promoter (<=1kb)	chr1	190160522	190169399	8878	-	19130	uc007ebc.2	-331	ENSMUSG00000010175	Prox1	prospero homeobox 1
273	chr1	190169965	190170032	68	*	1.72092e-09	0.393525	0.00128752	0.392238	Promoter (<=1kb)	chr1	190160522	190169399	8878	-	19130	uc007ebc.2	-566	ENSMUSG00000010175	Prox1	prospero homeobox 1
274	chr1	190170936	190171030	95	*	0.000261576	5.19896e-05	0.00162724	-0.00156936	Promoter (<=1kb)	chr1	190121777	190170680	48904	-	19130	uc033fol.1	-256	ENSMUSG00000010175	Prox1	prospero homeobox 1
275	chr1	191063032	191063076	45	*	2.49134e-07	6.67042e-05	0.0157818	-0.0157151	Promoter (<=1kb)	chr1	191063021	191076939	13919	+	381318	uc007eca.2	55	ENSMUSG00000062510	Nsl1	NSL1, MIND kinetochore complex component, homolog (S. cerevisiae)
276	chr1	191063198	191063292	95	*	0.000181248	0.000722319	3.87633e-05	0.000683556	Promoter (<=1kb)	chr1	191063021	191076939	13919	+	381318	uc007eca.2	271	ENSMUSG00000062510	Nsl1	NSL1, MIND kinetochore complex component, homolog (S. cerevisiae)
277	chr1	191326048	191326064	17	*	1.9095e-07	0.00214877	3.14395e-05	0.00211733	Promoter (<=1kb)	chr1	191325965	191352925	26961	+	66950	uc007ech.1	99	ENSMUSG00000026627	Tmem206	transmembrane protein 206
278	chr1	191326191	191326239	49	*	5.94336e-05	0.000232228	0.0104069	-0.0101747	Promoter (<=1kb)	chr1	191325965	191352925	26961	+	66950	uc007ech.1	274	ENSMUSG00000026627	Tmem206	transmembrane protein 206
279	chr1	191575490	191575531	42	*	3.32119e-07	0.372718	0.00447597	0.368306	Promoter (<=1kb)	chr1	191537356	191575544	38189	-	76843	uc007eck.2	13	ENSMUSG00000037474	Dtl	denticleless homolog (Drosophila)
280	chr1	191575534	191575534	1	*	5.44594e-05	6.7832e-05	0.00424347	-0.00417564	Promoter (<=1kb)	chr1	191537356	191575544	38189	-	76843	uc007eck.2	10	ENSMUSG00000037474	Dtl	denticleless homolog (Drosophila)
281	chr1	191575544	191575557	14	*	3.16622e-08	0.372965	0.00290657	0.370058	Promoter (<=1kb)	chr1	191537356	191575544	38189	-	76843	uc007eck.2	0	ENSMUSG00000037474	Dtl	denticleless homolog (Drosophila)
282	chr1	191575562	191575562	1	*	0.000104474	5.98325e-05	0.00278458	-0.00272474	Promoter (<=1kb)	chr1	191537356	191575544	38189	-	76843	uc007eck.2	-18	ENSMUSG00000037474	Dtl	denticleless homolog (Drosophila)
283	chr1	191575580	191575580	1	*	1.71985e-10	0.379493	0.0012991	0.378194	Promoter (<=1kb)	chr1	191537356	191575544	38189	-	76843	uc007eck.2	-36	ENSMUSG00000037474	Dtl	denticleless homolog (Drosophila)
284	chr1	191718270	191718302	33	*	0.000820512	0.000305526	3.2757e-05	0.000272769	Promoter (<=1kb)	chr1	191718395	191784257	65863	+	226856	uc007ect.3	-125	ENSMUSG00000026623	Lpgat1	lysophosphatidylglycerol acyltransferase 1
285	chr1	191718325	191718362	38	*	0.000176917	3.47998e-05	0.000831982	-0.000797182	Promoter (<=1kb)	chr1	191718395	191784257	65863	+	226856	uc007ect.3	-70	ENSMUSG00000026623	Lpgat1	lysophosphatidylglycerol acyltransferase 1
286	chr1	191718778	191718826	49	*	5.32011e-06	0.35505	0.0057276	0.348756	Promoter (<=1kb)	chr1	191718395	191784257	65863	+	226856	uc007ect.3	431	ENSMUSG00000026623	Lpgat1	lysophosphatidylglycerol acyltransferase 1
287	chr10	5805788	5805788	1	*	2.95743e-13	0.384585	0.000549388	0.384036	Promoter (<=1kb)	chr10	5799158	5805465	6308	-	67141	uc007egj.1	-323	ENSMUSG00000019773	Fbxo5	F-box protein 5
288	chr10	7681786	7681786	1	*	3.26445e-08	0.367588	0.00278736	0.364801	Promoter (<=1kb)	chr10	7681209	7716461	35253	+	16798	uc007eig.2	577	ENSMUSG00000040021	Lats1	large tumor suppressor
289	chr10	7681805	7681805	1	*	0.000756964	0.000181625	0.00671546	-0.00653384	Promoter (<=1kb)	chr10	7681209	7716461	35253	+	16798	uc007eig.2	596	ENSMUSG00000040021	Lats1	large tumor suppressor
290	chr10	7681823	7681823	1	*	4.59098e-06	0.344001	0.00570259	0.338299	Promoter (<=1kb)	chr10	7681209	7716461	35253	+	16798	uc007eig.2	614	ENSMUSG00000040021	Lats1	large tumor suppressor
291	chr10	8729831	8729855	25	*	0.000270315	0.98368	0.830967	0.152712	Exon (uc007eiu.1/70097, exon 18 of 20)	chr10	8722219	8886070	163852	-	70097	uc007eiu.1	156215	ENSMUSG00000015305	Sash1	SAM and SH3 domain containing 1
292	chr10	9770574	9770584	11	*	3.91755e-05	0.865087	0.734724	0.130362	Promoter (<=1kb)	chr10	9767099	9770521	3423	-	78808	uc007ejc.1	-53	ENSMUSG00000019790	Stxbp5	syntaxin binding protein 5 (tomosyn)
293	chr10	10557990	10558083	94	*	2.33168e-05	3.06858e-05	0.00132464	-0.00129395	Promoter (<=1kb)	chr10	10545039	10558207	13169	-	67844	uc007ejg.1	124	ENSMUSG00000019832	Rab32	RAB32, member RAS oncogene family
294	chr10	10558228	10558240	13	*	0.00276856	0.006633	0.00031263	0.00632037	Promoter (<=1kb)	chr10	10545039	10558207	13169	-	67844	uc007ejg.1	-21	ENSMUSG00000019832	Rab32	RAB32, member RAS oncogene family
295	chr10	11281721	11281810	90	*	2.43757e-09	0.382427	0.0020427	0.380323	Promoter (<=1kb)	chr10	11281587	11297969	16383	+	71865	uc011xad.1	223	ENSMUSG00000047648	Fbxo30	F-box protein 30
296	chr10	11449956	11449983	28	*	1.66598e-05	0.148246	0.00706482	0.140101	Intron (uc007ejv.1/13853, intron 3 of 3)	chr10	11343445	11457477	114033	+	13853	uc007ejv.1	106538	ENSMUSG00000055493	Epm2a	epilepsy, progressive myoclonic epilepsy, type 2 gene alpha
297	chr10	13501082	13501083	2	*	0.000105595	0.000238823	0.0123689	-0.0121301	Promoter (<=1kb)	chr10	13501028	13513098	12071	+	66848	uc007eku.1	55	ENSMUSG00000019810	Fuca2	fucosidase, alpha-L- 2, plasma
298	chr10	13501119	13501119	1	*	5.46515e-07	0.374679	0.00459236	0.370087	Promoter (<=1kb)	chr10	13501028	13513098	12071	+	66848	uc007eku.1	91	ENSMUSG00000019810	Fuca2	fucosidase, alpha-L- 2, plasma
299	chr10	13868887	13868935	49	*	4.94245e-08	0.00251163	3.91646e-05	0.00247246	Promoter (<=1kb)	chr10	13647055	13868830	221776	-	66253	uc007elb.1	-57	ENSMUSG00000019806	Aig1	androgen-induced 1
300	chr10	13869104	13869135	32	*	8.50317e-11	0.38272	0.00128329	0.381436	Promoter (<=1kb)	chr10	13647055	13868830	221776	-	66253	uc007elb.1	-274	ENSMUSG00000019806	Aig1	androgen-induced 1
301	chr10	13964533	13964533	1	*	0.00799851	0.0163964	0.000868068	0.0155283	Promoter (1-2kb)	chr10	13966077	14151378	185302	+	15273	uc007elg.1	-1544	ENSMUSG00000015501	Hivep2	human immunodeficiency virus type I enhancer binding protein 2
302	chr10	13964660	13964817	158	*	1.76629e-06	3.30298e-05	0.00119918	-0.00116615	Promoter (1-2kb)	chr10	13966077	14151378	185302	+	15273	uc007elg.1	-1417	ENSMUSG00000015501	Hivep2	human immunodeficiency virus type I enhancer binding protein 2
303	chr10	13964876	13964876	1	*	2.02322e-08	0.00395321	4.21283e-05	0.00391108	Promoter (1-2kb)	chr10	13966077	14151378	185302	+	15273	uc007elg.1	-1201	ENSMUSG00000015501	Hivep2	human immunodeficiency virus type I enhancer binding protein 2
304	chr10	13965256	13965257	2	*	0.000677423	0.0491853	0.00111601	0.0480693	Promoter (<=1kb)	chr10	13966077	14151378	185302	+	15273	uc007elg.1	-821	ENSMUSG00000015501	Hivep2	human immunodeficiency virus type I enhancer binding protein 2
305	chr10	13966109	13966122	14	*	0.000379223	6.65e-05	0.00289184	-0.00282534	Promoter (<=1kb)	chr10	13966077	14151378	185302	+	15273	uc007elg.1	45	ENSMUSG00000015501	Hivep2	human immunodeficiency virus type I enhancer binding protein 2
306	chr10	13966770	13966807	38	*	3.69437e-05	0.013386	0.000238868	0.0131471	Promoter (<=1kb)	chr10	13966379	14132798	166420	+	15273	uc007elh.1	428	ENSMUSG00000015501	Hivep2	human immunodeficiency virus type I enhancer binding protein 2
307	chr10	14705282	14705365	84	*	3.11294e-07	3.11958e-05	0.00167201	-0.00164082	Promoter (<=1kb)	chr10	14655333	14705489	50157	-	66201	uc007ell.1	124	ENSMUSG00000019868	Vta1	Vps20-associated 1 homolog (S. cerevisiae)
308	chr10	17724450	17724474	25	*	7.48765e-08	0.375605	0.00327955	0.372326	Promoter (1-2kb)	chr10	17723421	17725674	2254	+	17684	uc007elu.2	1053	ENSMUSG00000039910	Cited2	Cbp/p300-interacting transactivator, with Glu/Asp-rich carboxy-terminal domain, 2
309	chr10	17947270	17947302	33	*	2.48176e-06	0.00380957	4.28408e-05	0.003766	Promoter (<=1kb)	chr10	17900084	17948067	47984	-	380629	uc007elw.1	765	ENSMUSG00000039879	Heca	headcase homolog (Drosophila)
310	chr10	17947876	17947899	24	*	2.67319e-13	0.384202	0.000561261	0.383641	Promoter (<=1kb)	chr10	17900084	17948067	47984	-	380629	uc007elw.1	168	ENSMUSG00000039879	Heca	headcase homolog (Drosophila)
311	chr10	17948087	17948180	94	*	3.90927e-07	0.00626287	7.33657e-05	0.00618218	Promoter (<=1kb)	chr10	17900084	17948067	47984	-	380629	uc007elw.1	-20	ENSMUSG00000039879	Heca	headcase homolog (Drosophila)
312	chr10	18055598	18055628	31	*	9.43191e-05	0.000719181	3.33593e-05	0.000685822	Promoter (<=1kb)	chr10	18055940	18125155	69216	+	19707	uc007ema.2	-342	ENSMUSG00000019854	Reps1	RalBP1 associated Eps domain containing protein
313	chr10	18056071	18056088	18	*	1.24282e-05	0.00258536	5.76027e-05	0.00252776	Promoter (<=1kb)	chr10	18055940	18125155	69216	+	19707	uc007ema.2	148	ENSMUSG00000019854	Reps1	RalBP1 associated Eps domain containing protein
314	chr10	18056175	18056181	7	*	4.91991e-05	3.65704e-05	0.00152027	-0.0014837	Promoter (<=1kb)	chr10	18055940	18125155	69216	+	19707	uc007ema.2	241	ENSMUSG00000019854	Reps1	RalBP1 associated Eps domain containing protein
315	chr10	18056200	18056248	49	*	1.324e-12	0.384986	0.000688046	0.384298	Promoter (<=1kb)	chr10	18055940	18125155	69216	+	19707	uc007ema.2	308	ENSMUSG00000019854	Reps1	RalBP1 associated Eps domain containing protein
316	chr10	18319217	18319262	46	*	3.21226e-06	0.00218567	3.48014e-05	0.00215076	Distal Intergenic	chr10	18213685	18234981	21297	-	215814	uc007eme.1	-84236	ENSMUSG00000059554	Ccdc28a	coiled-coil domain containing 28A
317	chr10	19907543	19907588	46	*	1.61163e-11	0.381672	0.00132626	0.380346	Promoter (<=1kb)	chr10	19860090	19907674	47585	-	18634	uc007enl.2	86	ENSMUSG00000020003	Pex7	peroxisomal biogenesis factor 7
318	chr10	20312302	20312395	94	*	4.84812e-05	0.00100157	3.8266e-05	0.000963307	Promoter (<=1kb)	chr10	20312469	20342501	30033	+	72567	uc007ent.1	-167	ENSMUSG00000037608	Bclaf1	BCL2-associated transcription factor 1
319	chr10	20952584	20952593	10	*	1.90231e-06	0.00207738	4.0375e-05	0.002037	Promoter (<=1kb)	chr10	20952547	20966021	13475	+	52906	uc011xbc.1	46	ENSMUSG00000019986	Ahi1	Abelson helper integration site 1
320	chr10	20952724	20952877	154	*	0.00033513	3.39794e-05	0.00088479	-0.000850811	Promoter (<=1kb)	chr10	20952547	20966021	13475	+	52906	uc011xbc.1	330	ENSMUSG00000019986	Ahi1	Abelson helper integration site 1
321	chr10	21295916	21295978	63	*	1.69528e-05	0.000949523	3.19535e-05	0.00091769	Promoter (<=1kb)	chr10	21295979	21311198	15220	+	56422	uc007eol.2	-63	ENSMUSG00000019977	Hbs1l	Hbs1-like (S. cerevisiae)
322	chr10	21296554	21296600	47	*	3.3988e-08	0.383122	0.00273727	0.380385	Promoter (<=1kb)	chr10	21295979	21311198	15220	+	56422	uc007eol.2	621	ENSMUSG00000019977	Hbs1l	Hbs1-like (S. cerevisiae)
323	chr10	24712352	24712422	71	*	9.18756e-07	0.00993335	0.000102451	0.0098309	Promoter (<=1kb)	chr10	24641411	24712102	70692	-	18605	uc007eqx.1	-250	ENSMUSG00000037370	Enpp1	ectonucleotide pyrophosphatase/phosphodiesterase 1
324	chr10	24912691	24912722	32	*	0.000268519	0.872704	0.990051	-0.117348	Promoter (2-3kb)	chr10	24910664	24910733	70	+	102465545	uc033foy.1	2058	#N/A	Mir6905	microRNA 6905
325	chr10	26374657	26374701	45	*	3.45271e-05	0.00338016	6.57954e-05	0.00331437	Promoter (<=1kb)	chr10	26275452	26375185	99734	-	237339	uc007esb.1	484	ENSMUSG00000039089	L3mbtl3	l(3)mbt-like 3 (Drosophila)
326	chr10	30600468	30600540	73	*	1.45089e-06	0.00294483	5.22627e-05	0.00289257	Promoter (<=1kb)	chr10	30534225	30600749	66525	-	73681	uc007ete.1	209	ENSMUSG00000019792	Trmt11	tRNA methyltransferase 11
327	chr10	30600541	30600546	6	*	0.000153683	3.06421e-05	0.000719672	-0.000689029	Promoter (<=1kb)	chr10	30534225	30600749	66525	-	73681	uc007ete.1	203	ENSMUSG00000019792	Trmt11	tRNA methyltransferase 11
328	chr10	30600556	30600637	82	*	9.76402e-10	0.382252	0.00183165	0.380835	Promoter (<=1kb)	chr10	30534225	30600749	66525	-	73681	uc007ete.1	112	ENSMUSG00000019792	Trmt11	tRNA methyltransferase 11
329	chr10	30600650	30600656	7	*	7.72148e-06	3.06536e-05	0.00199269	-0.00196204	Promoter (<=1kb)	chr10	30534225	30600749	66525	-	73681	uc007ete.1	93	ENSMUSG00000019792	Trmt11	tRNA methyltransferase 11
330	chr10	30802638	30802762	125	*	1.8446e-08	0.37179	0.00251776	0.369291	Promoter (<=1kb)	chr10	30645582	30803107	157526	-	211329	uc007etl.2	345	ENSMUSG00000039697	Ncoa7	nuclear receptor coactivator 7
331	chr10	30843039	30843078	40	*	2.28879e-06	0.00766785	7.02936e-05	0.00759755	Promoter (<=1kb)	chr10	30832359	30842783	10425	-	15214	uc007etp.1	-256	ENSMUSG00000019789	Hey2	hairy/enhancer-of-split related with YRPW motif 2
332	chr10	31639233	31639233	1	*	0.00287295	0.970893	0.848589	0.122304	Distal Intergenic	chr10	31501887	31609725	107839	-	268291	uc007etu.2	-29508	ENSMUSG00000063760	Rnf217	ring finger protein 217
333	chr10	34282622	34282657	36	*	7.86171e-08	0.00336816	4.59467e-05	0.00332222	Promoter (<=1kb)	chr10	34282190	34284885	2696	+	22110	uc007eut.2	467	ENSMUSG00000047514	Tspyl1	testis-specific protein, Y-encoded-like 1
334	chr10	39731839	39731852	14	*	5.95736e-09	3.57437e-05	0.00634595	-0.0063102	Promoter (<=1kb)	chr10	39621411	39732007	110597	-	327744	uc007ewb.2	155	ENSMUSG00000087177	E130307A14Rik	RIKEN cDNA E130307A14 gene
335	chr10	39732158	39732234	77	*	3.20694e-08	0.380278	0.00500033	0.374916	Promoter (<=1kb)	chr10	39732160	39825258	93099	+	19714	uc007ewc.1	0	ENSMUSG00000019841	Rev3l	REV3-like, catalytic subunit of DNA polymerase zeta RAD54 like (S. cerevisiae)
336	chr10	40264219	40264219	1	*	0.00265967	0.972805	0.805429	0.167376	Distal Intergenic	chr10	40249203	40257665	8463	-	67371	uc007ewr.1	-6554	ENSMUSG00000019837	Gtf3c6	general transcription factor IIIC, polypeptide 6, alpha
337	chr10	40551023	40551024	2	*	0.000261949	0.791862	0.656348	0.135514	Distal Intergenic	chr10	40570362	40604132	33771	+	70840	uc007ewz.1	-19339	ENSMUSG00000019834	Slc22a16	solute carrier family 22 (organic cation transporter), member 16
338	chr10	41450395	41450395	1	*	0.00119262	0.00406563	0.19321	-0.189145	Promoter (<=1kb)	chr10	41450358	41453468	3111	+	268294	uc007exl.2	37	ENSMUSG00000019826	Zbtb24	zinc finger and BTB domain containing 24
339	chr10	41450486	41450666	181	*	3.20652e-12	0.38355	0.000744774	0.382777	Promoter (<=1kb)	chr10	41450358	41453468	3111	+	268294	uc007exl.2	308	ENSMUSG00000019826	Zbtb24	zinc finger and BTB domain containing 24
340	chr10	41476581	41476665	85	*	3.47846e-06	0.358043	0.00532428	0.351563	Promoter (<=1kb)	chr10	41476314	41487030	10717	+	171580	uc007exn.2	351	ENSMUSG00000019823	Mical1	microtubule associated monooxygenase, calponin and LIM domain containing 1
341	chr10	41519348	41519362	15	*	7.19803e-07	0.293309	0.000948666	0.292361	Promoter (<=1kb)	chr10	41519500	41531042	11543	+	53599	uc007exv.1	-152	ENSMUSG00000019818	Cd164	CD164 antigen
342	chr10	41519539	41519553	15	*	0.000190888	6.36778e-05	0.00205878	-0.00199511	Promoter (<=1kb)	chr10	41519500	41531042	11543	+	53599	uc007exv.1	53	ENSMUSG00000019818	Cd164	CD164 antigen
343	chr10	41519678	41519678	1	*	1.20649e-08	3.07767e-05	0.00528402	-0.00525325	Promoter (<=1kb)	chr10	41519500	41531042	11543	+	53599	uc007exv.1	178	ENSMUSG00000019818	Cd164	CD164 antigen
344	chr10	41887425	41887482	58	*	7.95263e-07	0.00480111	5.33977e-05	0.00474771	Promoter (<=1kb)	chr10	41887439	41908436	20998	+	140742	uc007eyf.2	0	ENSMUSG00000038332	Sesn1	sestrin 1
345	chr10	42192154	42192174	21	*	9.08094e-21	0.698981	0.932684	-0.233703	Intron (uc007eyl.1/56484, intron 1 of 3)	chr10	42196466	42275598	79133	-	56484	uc007eyo.1	83424	ENSMUSG00000048756	Foxo3	forkhead box O3
346	chr10	42275651	42275699	49	*	1.20818e-05	0.00159019	4.76781e-05	0.00154248	Promoter (<=1kb)	chr10	42196466	42275598	79133	-	56484	uc007eyo.1	-53	ENSMUSG00000048756	Foxo3	forkhead box O3
347	chr10	42275871	42275903	33	*	8.26901e-07	0.393378	0.00422236	0.389224	Promoter (<=1kb)	chr10	42196466	42275598	79133	-	56484	uc007eyo.1	-273	ENSMUSG00000048756	Foxo3	forkhead box O3
348	chr10	42277438	42277508	71	*	7.29769e-05	3.55682e-05	0.00132207	-0.00128651	Promoter (<=1kb)	chr10	42185786	42276742	90957	-	56484	uc007eyl.1	-696	ENSMUSG00000048756	Foxo3	forkhead box O3
349	chr10	42762312	42762321	10	*	4.04824e-06	0.00336008	5.67908e-05	0.00330329	Promoter (<=1kb)	chr10	42761496	42832514	71019	+	140740	uc007eyx.2	825	ENSMUSG00000019802	Sec63	SEC63-like (S. cerevisiae)
350	chr10	43540703	43540758	56	*	7.54799e-05	0.000789532	3.52539e-05	0.000754278	Promoter (<=1kb)	chr10	43525121	43540994	15874	-	67851	uc007ezk.1	236	ENSMUSG00000019797	1700021F05Rik	RIKEN cDNA 1700021F05 gene
351	chr10	43540829	43540830	2	*	0.000469694	0.000208249	0.0147633	-0.014555	Promoter (<=1kb)	chr10	43525121	43540994	15874	-	67851	uc007ezk.1	164	ENSMUSG00000019797	1700021F05Rik	RIKEN cDNA 1700021F05 gene
352	chr10	43901628	43901628	1	*	0.00380814	3.157e-05	0.000228718	-0.000197148	Promoter (<=1kb)	chr10	43874190	43901736	27547	-	76563	uc007ezn.1	108	ENSMUSG00000019863	Qrsl1	glutaminyl-tRNA synthase (glutamine-hydrolyzing)-like 1
353	chr10	43901715	43901768	54	*	7.95896e-09	0.384189	0.00323214	0.380957	Promoter (<=1kb)	chr10	43874190	43901736	27547	-	76563	uc007ezn.1	0	ENSMUSG00000019863	Qrsl1	glutaminyl-tRNA synthase (glutamine-hydrolyzing)-like 1
354	chr10	44265532	44265532	1	*	0.000692038	0.971797	0.545035	0.426762	Promoter (2-3kb)	chr10	44268358	44364291	95934	+	11793	uc007ezt.1	-2826	ENSMUSG00000038160	Atg5	autophagy related 5
355	chr10	50592612	50592667	56	*	5.77102e-11	0.00732245	4.56921e-05	0.00727676	Promoter (<=1kb)	chr10	50592669	50851202	258534	+	77987	uc007fak.2	-57	ENSMUSG00000038774	Ascc3	activating signal cointegrator 1 complex subunit 3
356	chr10	52233809	52233905	97	*	0.000334535	0.00129206	4.15141e-05	0.00123132	Promoter (<=1kb)	chr10	52233619	52288545	54927	+	66686	uc007fbc.1	286	ENSMUSG00000019891	Dcbld1	discoidin, CUB and LCCL domain containing 1
357	chr10	53597274	53597274	1	*	0.000733151	0.000225536	0.00789556	-0.00767003	Promoter (<=1kb)	chr10	53596961	53609215	12255	+	66403	uc007fbr.1	313	ENSMUSG00000019857	Asf1a	anti-silencing function 1A histone chaperone
358	chr10	53597711	53597785	75	*	0.000158301	2.97703e-05	0.000587343	-0.000557757	Promoter (<=1kb)	chr10	53537324	53597648	60325	-	71567	uc011xdv.1	-63	ENSMUSG00000058298	Mcm9	minichromosome maintenance complex component 9
359	chr10	53629695	53629764	70	*	2.18737e-05	0.00088025	3.10404e-05	0.000849209	Promoter (<=1kb)	chr10	53608069	53630131	22063	-	71567	uc011xdw.1	367	ENSMUSG00000058298	Mcm9	minichromosome maintenance complex component 9
360	chr10	54075552	54075600	49	*	1.78794e-05	4.79134e-05	0.00357506	-0.00352715	Promoter (<=1kb)	chr10	53906033	54075709	169677	-	17155	uc011xdx.1	109	ENSMUSG00000003746	Man1a	mannosidase 1, alpha
361	chr10	54075888	54075895	8	*	2.28347e-05	0.274428	0.00193197	0.272496	Promoter (<=1kb)	chr10	54075922	54081081	5160	+	100502920	uc007fbz.1	-34	ENSMUSG00000097069	Gm16998	predicted gene, 16998
362	chr10	54076005	54076047	43	*	2.06929e-07	0.0058049	3.64443e-05	0.00576846	Promoter (<=1kb)	chr10	54075922	54081081	5160	+	100502920	uc007fbz.1	125	ENSMUSG00000097069	Gm16998	predicted gene, 16998
363	chr10	57486888	57486896	9	*	8.26239e-08	3.44794e-05	0.00245877	-0.00242429	Promoter (<=1kb)	chr10	57486385	57513143	26759	+	15500	uc007fck.2	511	ENSMUSG00000019878	Hsf2	heat shock factor 2
364	chr10	58255657	58255739	83	*	1.79663e-05	0.00111045	3.25655e-05	0.00107767	Promoter (<=1kb)	chr10	58255526	58305592	50067	+	70297	uc007fcx.1	213	ENSMUSG00000038039	Gcc2	GRIP and coiled-coil domain containing 2
365	chr10	58446582	58446597	16	*	3.3559e-05	0.00200863	5.0656e-05	0.00195794	Promoter (<=1kb)	chr10	58446852	58494154	47303	+	19386	uc007fdd.1	-270	ENSMUSG00000003226	Ranbp2	RAN binding protein 2
366	chr10	58447021	58447177	157	*	9.63239e-09	0.0021806	3.16145e-05	0.00211243	Promoter (<=1kb)	chr10	58447195	58460973	13779	+	19386	uc007fde.1	-174	ENSMUSG00000003226	Ranbp2	RAN binding protein 2
367	chr10	58497944	58497996	53	*	1.16914e-07	0.360262	0.00331649	0.356945	Promoter (<=1kb)	chr10	58497937	58576244	78308	+	76138	uc007fdf.2	59	ENSMUSG00000038010	Ccdc138	coiled-coil domain containing 138
368	chr10	58675596	58675606	11	*	0.000181169	0.0314262	0.00110392	0.0303223	Promoter (<=1kb)	chr10	58600788	58675696	74909	-	13608	uc007fdh.2	90	ENSMUSG00000003227	Edar	ectodysplasin-A receptor
369	chr10	59880177	59880177	1	*	0.000586624	0.000296785	0.00620722	-0.00591043	Promoter (<=1kb)	chr10	59879591	59896775	17185	+	56709	uc007fdz.1	586	ENSMUSG00000020109	Dnajb12	DnaJ (Hsp40) homolog, subfamily B, member 12
370	chr10	59952293	59952339	47	*	7.88716e-07	0.379873	0.00552827	0.374344	Promoter (<=1kb)	chr10	59949675	59951770	2096	-	74747	uc007fee.1	-523	ENSMUSG00000020108	Ddit4	DNA-damage-inducible transcript 4
371	chr10	60277821	60277899	79	*	2.03094e-09	0.383531	0.00193701	0.381116	Promoter (<=1kb)	chr10	60277628	60302600	24973	+	19156	uc007feo.2	271	ENSMUSG00000004207	Psap	prosaposin
372	chr10	60780348	60780359	12	*	8.32438e-05	0.776702	0.881076	-0.104937	Intron (uc007ffd.1/107449, intron 14 of 15)	chr10	60712072	60752782	40711	-	71279	uc007ffb.1	-27566	ENSMUSG00000020100	Slc29a3	solute carrier family 29 (nucleoside transporters), member 3
373	chr10	61273450	61273494	45	*	1.14577e-09	0.383024	0.00345535	0.379752	Promoter (<=1kb)	chr10	61197112	61273438	76327	-	237360	uc007ffu.1	-12	ENSMUSG00000059901	Adamts14	a disintegrin-like and metallopeptidase (reprolysin type) with thrombospondin type 1 motif, 14
374	chr10	61649075	61649082	8	*	0.000202014	0.0197646	0.000398228	0.0193664	Promoter (<=1kb)	chr10	61648621	61674165	25545	+	67895	uc007fge.1	461	ENSMUSG00000020089	Ppa1	pyrophosphatase (inorganic) 1
375	chr10	61662670	61662709	40	*	0.000123705	0.339397	0.107449	0.231949	Intron (uc007fge.1/67895, intron 4 of 10)	chr10	61648621	61674165	25545	+	67895	uc007fge.1	14088	ENSMUSG00000020089	Ppa1	pyrophosphatase (inorganic) 1
376	chr10	61680204	61680315	112	*	2.35928e-10	0.382333	0.001432	0.380923	Promoter (<=1kb)	chr10	61674527	61680290	5764	-	75539	uc007fgf.2	0	#N/A	1700022H01Rik	RIKEN cDNA 1700022H01 gene
377	chr10	61680482	61680549	68	*	5.11251e-11	0.383656	0.00116005	0.382601	Promoter (<=1kb)	chr10	61680321	61693297	12977	+	20224	uc007fgg.1	228	ENSMUSG00000020088	Sar1a	SAR1 gene homolog A (S. cerevisiae)
378	chr10	61783146	61783301	156	*	6.11134e-05	3.09724e-05	0.000946664	-0.000915727	Promoter (<=1kb)	chr10	61738647	61783864	45218	-	404634	uc007fgm.1	563	ENSMUSG00000020086	H2afy2	H2A histone family, member Y2
379	chr10	61783324	61783381	58	*	9.46559e-05	0.00176364	5.46103e-05	0.00170903	Promoter (<=1kb)	chr10	61738647	61783864	45218	-	404634	uc007fgm.1	483	ENSMUSG00000020086	H2afy2	H2A histone family, member Y2
380	chr10	61783535	61783564	30	*	5.43624e-08	3.2564e-05	0.00236612	-0.00233356	Promoter (<=1kb)	chr10	61738647	61783864	45218	-	404634	uc007fgm.1	300	ENSMUSG00000020086	H2afy2	H2A histone family, member Y2
381	chr10	62449672	62449800	129	*	1.03484e-05	0.0024904	4.48135e-05	0.00244004	Promoter (<=1kb)	chr10	62429378	62449693	20316	-	338359	uc007fhd.1	0	ENSMUSG00000020079	Supv3l1	suppressor of var1, 3-like 1 (S. cerevisiae)
382	chr10	62486518	62486552	35	*	1.35727e-05	0.00193817	3.8613e-05	0.00189985	Promoter (<=1kb)	chr10	62454843	62486598	31756	-	30930	uc007fhf.2	46	ENSMUSG00000020078	Vps26a	vacuolar protein sorting 26 homolog A (yeast)
383	chr10	62651533	62651545	13	*	5.83581e-11	2.97132e-05	0.000865734	-0.00083602	Promoter (<=1kb)	chr10	62616023	62651198	35176	-	94213	uc007fhp.1	-335	ENSMUSG00000020076	Ddx50	DEAD (Asp-Glu-Ala-Asp) box polypeptide 50
384	chr10	62791621	62791621	1	*	1.44625e-08	0.382139	0.00273966	0.3794	Promoter (<=1kb)	chr10	62753174	62792231	39058	-	67500	uc007fjb.1	610	ENSMUSG00000020074	Ccar1	cell division cycle and apoptosis regulator 1
385	chr10	62791649	62791794	146	*	4.24675e-05	3.09811e-05	0.000932514	-0.000900722	Promoter (<=1kb)	chr10	62753174	62792231	39058	-	67500	uc007fjb.1	437	ENSMUSG00000020074	Ccar1	cell division cycle and apoptosis regulator 1
386	chr10	62980246	62980269	24	*	8.35705e-12	0.00299905	3.29381e-05	0.00295651	Promoter (<=1kb)	chr10	62980223	62990293	10071	+	70432	uc007fjl.1	46	ENSMUSG00000020070	Rufy2	RUN and FYVE domain-containing 2
387	chr10	62980326	62980348	23	*	0.000114359	3.0633e-05	0.00081975	-0.000789117	Promoter (<=1kb)	chr10	62980223	62990293	10071	+	70432	uc007fjl.1	125	ENSMUSG00000020070	Rufy2	RUN and FYVE domain-containing 2
388	chr10	63023172	63023206	35	*	2.55343e-06	3.71151e-05	0.0054438	-0.00540668	Promoter (<=1kb)	chr10	63014664	63023748	9085	-	432467	uc011xfk.1	542	ENSMUSG00000020069	Hnrnph3	heterogeneous nuclear ribonucleoprotein H3
389	chr10	63023569	63023646	78	*	8.65656e-12	0.384587	0.000977412	0.383546	Promoter (<=1kb)	chr10	63014664	63023748	9085	-	432467	uc011xfk.1	102	ENSMUSG00000020069	Hnrnph3	heterogeneous nuclear ribonucleoprotein H3
390	chr10	67097030	67097084	55	*	1.92228e-08	0.383191	0.00296995	0.380221	Promoter (<=1kb)	chr10	67009189	67096988	87800	-	28193	uc007flq.2	-42	ENSMUSG00000019873	Reep3	receptor accessory protein 3
391	chr10	67535335	67535429	95	*	4.96728e-08	3.81085e-05	0.00592975	-0.00589164	Promoter (2-3kb)	chr10	67537869	67542188	4320	+	13654	uc007flx.1	-2534	ENSMUSG00000037868	Egr2	early growth response 2
392	chr10	67536973	67537045	73	*	4.07289e-11	0.383433	0.00111879	0.382315	Promoter (<=1kb)	chr10	67537869	67542188	4320	+	13654	uc007flx.1	-896	ENSMUSG00000037868	Egr2	early growth response 2
393	chr10	68277172	68277273	102	*	4.78668e-07	5.44188e-05	0.00642691	-0.00636871	Promoter (1-2kb)	chr10	68095593	68278726	183134	-	71371	uc007fmh.1	1453	ENSMUSG00000019947	Arid5b	AT rich interactive domain 5B (MRF1-like)
394	chr10	69212834	69212969	136	*	2.61727e-05	0.377775	0.0130547	0.359942	Promoter (<=1kb)	chr10	69212657	69273527	60871	+	69288	uc007fmo.1	312	ENSMUSG00000019944	Rhobtb1	Rho-related BTB domain containing 1
395	chr10	69213216	69213219	4	*	0.000288243	3.92416e-05	0.00100768	-0.000968436	Promoter (<=1kb)	chr10	69213194	69291784	78591	+	69288	uc011xft.2	25	ENSMUSG00000019944	Rhobtb1	Rho-related BTB domain containing 1
396	chr10	69213495	69213616	122	*	1.32065e-06	0.016929	0.000206784	0.0167222	Promoter (<=1kb)	chr10	69213194	69291784	78591	+	69288	uc011xft.2	422	ENSMUSG00000019944	Rhobtb1	Rho-related BTB domain containing 1
397	chr10	71237884	71237895	12	*	1.95066e-05	0.000777012	3.56539e-05	0.000741358	Promoter (<=1kb)	chr10	71225477	71238044	12568	-	21780	uc007fom.1	149	ENSMUSG00000003923	Tfam	transcription factor A, mitochondrial
398	chr10	71238022	71238096	75	*	0.000750362	0.310351	0.0173	0.292847	Promoter (<=1kb)	chr10	71225477	71238044	12568	-	21780	uc007fom.1	0	ENSMUSG00000003923	Tfam	transcription factor A, mitochondrial
399	chr10	71284787	71284895	109	*	0.000161233	3.17388e-05	0.000584169	-0.000552558	Promoter (<=1kb)	chr10	71254980	71285262	30283	-	216080	uc007foo.2	367	ENSMUSG00000019927	Ube2d1	ubiquitin-conjugating enzyme E2D 1
400	chr10	71284938	71284943	6	*	6.62435e-06	0.00111823	3.852e-05	0.00107971	Promoter (<=1kb)	chr10	71254980	71285262	30283	-	216080	uc007foo.2	319	ENSMUSG00000019927	Ube2d1	ubiquitin-conjugating enzyme E2D 1
401	chr10	75061046	75061118	73	*	4.75998e-06	3.43535e-05	0.00319922	-0.00316487	Promoter (<=1kb)	chr10	75060896	75184923	124028	+	110279	uc007fqb.2	222	ENSMUSG00000009681	Bcr	breakpoint cluster region
402	chr10	75316920	75316999	80	*	1.39156e-11	0.383795	0.000671846	0.382847	Promoter (<=1kb)	chr10	75316877	75334792	17916	+	11540	uc007fqh.2	122	ENSMUSG00000020178	Adora2a	adenosine A2a receptor
403	chr10	75317204	75317217	14	*	9.14714e-08	3.61638e-05	0.00455265	-0.00451649	Promoter (<=1kb)	chr10	75316877	75334792	17916	+	11540	uc007fqh.2	340	ENSMUSG00000020178	Adora2a	adenosine A2a receptor
404	chr10	75667548	75667572	25	*	7.3347e-12	0.38774	0.000901903	0.386838	Promoter (<=1kb)	chr10	75646110	75667918	21809	-	104248	uc007fqu.1	346	ENSMUSG00000020196	Cabin1	calcineurin binding protein 1
405	chr10	75667724	75667910	187	*	2.76911e-08	0.00247135	3.87033e-05	0.00243475	Promoter (<=1kb)	chr10	75646110	75667918	21809	-	104248	uc007fqu.1	8	ENSMUSG00000020196	Cabin1	calcineurin binding protein 1
406	chr10	76032783	76032794	12	*	2.09445e-06	0.00349359	4.0232e-05	0.00345336	Promoter (<=1kb)	chr10	76032612	76042969	10358	+	64453	uc007ftw.2	182	ENSMUSG00000049764	Zfp280b	zinc finger protein 280B
407	chr10	76576666	76576666	1	*	0.000750928	0.779944	0.964845	-0.184901	Promoter (1-2kb)	chr10	76575648	76590338	14691	+	14317	uc007fut.2	1018	ENSMUSG00000001155	Ftcd	formiminotransferase cyclodeaminase
408	chr10	76770789	76770818	30	*	0.000145456	0.904768	0.784083	0.120685	Intron (uc007fuy.2/59093, intron 3 of 11)	chr10	76708792	76726044	17253	-	12833	uc007fux.1	-44745	ENSMUSG00000001119	Col6a1	collagen, type VI, alpha 1
409	chr10	77259316	77259361	46	*	0.000182834	3.39884e-05	0.000765695	-0.000731371	Promoter (<=1kb)	chr10	77259300	77269586	10287	+	80294	uc007fvj.1	61	ENSMUSG00000020260	Pofut2	protein O-fucosyltransferase 2
410	chr10	77259372	77259417	46	*	2.45188e-11	0.384628	0.00107451	0.383544	Promoter (<=1kb)	chr10	77259300	77269586	10287	+	80294	uc007fvj.1	117	ENSMUSG00000020260	Pofut2	protein O-fucosyltransferase 2
411	chr10	77259636	77259689	54	*	3.21368e-05	3.00017e-05	0.00106646	-0.00103646	Promoter (<=1kb)	chr10	77259300	77269586	10287	+	80294	uc007fvj.1	389	ENSMUSG00000020260	Pofut2	protein O-fucosyltransferase 2
412	chr10	77417569	77417569	1	*	0.000152292	0.336511	0.0142052	0.322306	Promoter (<=1kb)	chr10	77290727	77418273	127547	-	110532	uc007fvl.2	704	ENSMUSG00000020262	Adarb1	adenosine deaminase, RNA-specific, B1
413	chr10	78009343	78009464	122	*	2.56082e-07	0.00370396	4.78237e-05	0.0036509	Promoter (<=1kb)	chr10	77986949	78009796	22848	-	18641	uc007fwo.2	332	ENSMUSG00000020277	Pfkl	phosphofructokinase, liver, B-type
414	chr10	78177119	78177119	1	*	5.57793e-05	0.801847	0.95335	-0.151503	Exon (uc007fxk.1/110816, exon 14 of 21)	chr10	78162067	78169768	7702	-	28295	uc007fxj.1	-7351	ENSMUSG00000053329	D10Jhu81e	DNA segment, Chr 10, Johns Hopkins University 81 expressed
415	chr10	78244995	78245045	51	*	2.20843e-05	3.12159e-05	0.0012437	-0.00121152	Promoter (<=1kb)	chr10	78186726	78244642	57917	-	216131	uc007fxm.1	-353	ENSMUSG00000000374	Trappc10	trafficking protein particle complex 10
416	chr10	78351881	78351919	39	*	9.17615e-08	4.466e-05	0.00536202	-0.00531736	Promoter (<=1kb)	chr10	78271563	78351700	80138	-	28169	uc007fxq.1	-181	ENSMUSG00000001211	Agpat3	1-acylglycerol-3-phosphate O-acyltransferase 3
417	chr10	78352084	78352119	36	*	8.78951e-06	0.0019289	4.39877e-05	0.00189413	Promoter (<=1kb)	chr10	78274072	78352442	78371	-	28169	uc007fxr.1	323	ENSMUSG00000001211	Agpat3	1-acylglycerol-3-phosphate O-acyltransferase 3
418	chr10	78352315	78352326	12	*	0.00133913	0.000270208	0.00465779	-0.00438759	Promoter (<=1kb)	chr10	78274072	78352442	78371	-	28169	uc007fxr.1	116	ENSMUSG00000001211	Agpat3	1-acylglycerol-3-phosphate O-acyltransferase 3
419	chr10	79682920	79682973	54	*	1.41948e-09	0.373526	0.00183067	0.371695	Promoter (<=1kb)	chr10	79682195	79688398	6204	+	216150	uc007fzi.1	778	ENSMUSG00000020307	Cdc34	cell division cycle 34
420	chr10	79767521	79767579	59	*	9.70174e-12	0.382303	0.00123733	0.381066	Promoter (<=1kb)	chr10	79758515	79766952	8438	-	70294	uc007fzr.3	-569	ENSMUSG00000035890	Rnf126	ring finger protein 126
421	chr10	79854836	79854878	43	*	8.90188e-06	0.00182814	3.91534e-05	0.00178832	Promoter (<=1kb)	chr10	79851377	79854971	3595	-	414101	uc011xib.1	93	#N/A	E130317F20Rik	RIKEN cDNA E130317F20 gene
422	chr10	79855013	79855078	66	*	2.87475e-06	0.00154193	3.87869e-05	0.00150314	Promoter (<=1kb)	chr10	79851377	79854971	3595	-	414101	uc011xib.1	-42	#N/A	E130317F20Rik	RIKEN cDNA E130317F20 gene
423	chr10	79908911	79908911	1	*	9.88131e-324	2.95377e-05	0.5	-0.49997	Promoter (<=1kb)	chr10	79894707	79908938	14232	-	216154	uc007gak.2	27	ENSMUSG00000013833	Med16	mediator complex subunit 16
424	chr10	80102560	80102603	44	*	2.34365e-10	0.00284697	3.60748e-05	0.00281089	Promoter (<=1kb)	chr10	80057014	80102702	45689	-	216161	uc007gbn.1	99	ENSMUSG00000035673	Sbno2	strawberry notch homolog 2 (Drosophila)
425	chr10	80102717	80102726	10	*	0.000319686	0.000758712	4.18011e-05	0.000716911	Promoter (<=1kb)	chr10	80057014	80102702	45689	-	216161	uc007gbn.1	-15	ENSMUSG00000035673	Sbno2	strawberry notch homolog 2 (Drosophila)
426	chr10	80148806	80148886	81	*	2.59624e-05	3.07901e-05	0.00133759	-0.0013068	Promoter (<=1kb)	chr10	80148272	80158368	10097	+	59090	uc007gca.2	614	ENSMUSG00000035621	Midn	midnolin
427	chr10	80161178	80161306	129	*	1.27652e-06	3.59611e-05	0.00269854	-0.00266188	Intron (uc029qzy.1/100568459, intron 1 of 1)	chr10	80167841	80171653	3813	+	12696	uc007gce.1	-6663	ENSMUSG00000045193	Cirbp	cold inducible RNA binding protein
428	chr10	80161324	80161324	1	*	3.83934e-08	0.383696	0.00298217	0.380714	Intron (uc029qzy.1/100568459, intron 1 of 1)	chr10	80167841	80171653	3813	+	12696	uc007gce.1	-6517	ENSMUSG00000045193	Cirbp	cold inducible RNA binding protein
429	chr10	80173137	80173186	50	*	0.000111494	0.00180338	0.0273631	-0.0257823	Promoter (<=1kb)	chr10	80172944	80175119	2176	+	69770	uc007gcf.1	242	ENSMUSG00000035595	1600002K03Rik	RIKEN cDNA 1600002K03 gene
430	chr10	80179707	80179771	65	*	5.30234e-05	3.81849e-05	0.00166801	-0.00162983	Promoter (<=1kb)	chr10	80179482	80190010	10529	+	13637	uc007gcg.2	289	ENSMUSG00000003070	Efna2	ephrin A2
431	chr10	80179818	80179829	12	*	3.54729e-06	0.342985	0.0062683	0.336783	Promoter (<=1kb)	chr10	80179482	80190010	10529	+	13637	uc007gcg.2	347	ENSMUSG00000003070	Efna2	ephrin A2
432	chr10	80243630	80243648	19	*	4.3179e-05	0.896092	0.713549	0.182543	3' UTR	chr10	80249452	80256792	7341	+	75406	uc007gci.1	-5822	ENSMUSG00000020153	Ndufs7	NADH dehydrogenase (ubiquinone) Fe-S protein 7
433	chr10	80292350	80292409	60	*	3.35519e-07	0.0019992	3.18055e-05	0.0019674	Promoter (<=1kb)	chr10	80292431	80294114	1684	+	20054	uc007gcn.2	-81	ENSMUSG00000063457	Rps15	ribosomal protein S15
434	chr10	80292992	80293015	24	*	7.22804e-06	5.9655e-05	0.00750456	-0.00744256	Promoter (<=1kb)	chr10	80292431	80294114	1684	+	20054	uc007gcn.2	584	ENSMUSG00000063457	Rps15	ribosomal protein S15
435	chr10	80320146	80320234	89	*	1.90907e-05	0.00167096	3.82552e-05	0.0016328	Promoter (<=1kb)	chr10	80318255	80320548	2294	-	66374	uc007gcq.1	314	ENSMUSG00000020133	2310011J03Rik	RIKEN cDNA 2310011J03 gene
436	chr10	80387869	80387965	97	*	4.4029e-09	0.382258	0.0022244	0.380827	Promoter (<=1kb)	chr10	80380355	80387651	7297	-	237400	uc007gcz.1	-218	ENSMUSG00000048696	Mex3d	mex3 homolog D (C. elegans)
437	chr10	80398927	80399025	99	*	8.99927e-11	0.00412773	3.80901e-05	0.00408964	Promoter (<=1kb)	chr10	80392541	80399366	6826	-	17192	uc007gda.1	341	ENSMUSG00000035478	Mbd3	methyl-CpG binding domain protein 3
438	chr10	80399103	80399206	104	*	0.000525991	7.52558e-05	0.00215326	-0.002078	Promoter (<=1kb)	chr10	80392541	80399366	6826	-	17192	uc007gda.1	160	ENSMUSG00000035478	Mbd3	methyl-CpG binding domain protein 3
439	chr10	80399388	80399388	1	*	0.000118287	0.000970906	4.00194e-05	0.000930887	Promoter (<=1kb)	chr10	80392541	80399366	6826	-	17192	uc007gda.1	-22	ENSMUSG00000035478	Mbd3	methyl-CpG binding domain protein 3
440	chr10	80433262	80433342	81	*	8.82314e-05	3.02492e-05	0.00080527	-0.000775021	Promoter (<=1kb)	chr10	80409165	80433653	24489	-	21423	uc007gdf.2	311	ENSMUSG00000020167	Tcf3	transcription factor 3
441	chr10	80433554	80433640	87	*	2.22876e-14	0.385069	0.000418262	0.384665	Promoter (<=1kb)	chr10	80409165	80433653	24489	-	21423	uc007gdf.2	13	ENSMUSG00000020167	Tcf3	transcription factor 3
442	chr10	80433705	80433705	1	*	9.06542e-06	0.000211399	0.0264771	-0.0262657	Promoter (<=1kb)	chr10	80409165	80433653	24489	-	21423	uc007gdf.2	-52	ENSMUSG00000020167	Tcf3	transcription factor 3
443	chr10	80622060	80622089	30	*	0.000840378	3.02203e-05	0.000369061	-0.000338841	Promoter (<=1kb)	chr10	80622780	80640771	17992	+	103236	uc007gea.2	-720	ENSMUSG00000003345	Csnk1g2	casein kinase 1, gamma 2
444	chr10	80622885	80622930	46	*	1.81978e-05	3.17222e-05	0.000899859	-0.000867489	Promoter (<=1kb)	chr10	80622780	80640771	17992	+	103236	uc007gea.2	150	ENSMUSG00000003345	Csnk1g2	casein kinase 1, gamma 2
445	chr10	80656294	80656312	19	*	0.00039866	0.000319225	3.01719e-05	0.000289053	Promoter (<=1kb)	chr10	80642617	80657071	14455	-	208198	uc011xit.1	759	ENSMUSG00000003344	Btbd2	BTB (POZ) domain containing 2
446	chr10	80656447	80656496	50	*	6.81002e-07	3.69125e-05	0.0077218	-0.00768489	Promoter (<=1kb)	chr10	80642617	80657071	14455	-	208198	uc011xit.1	575	ENSMUSG00000003344	Btbd2	BTB (POZ) domain containing 2
447	chr10	80742238	80742238	1	*	1.37939e-07	3.16611e-05	0.00230287	-0.0022712	Promoter (<=1kb)	chr10	80706978	80742211	35234	-	11776	uc007gek.1	-27	ENSMUSG00000020198	Ap3d1	adaptor-related protein complex 3, delta 1 subunit
448	chr10	80742250	80742283	34	*	8.73465e-09	0.381917	0.00332732	0.37859	Promoter (<=1kb)	chr10	80706978	80742211	35234	-	11776	uc007gek.1	-39	ENSMUSG00000020198	Ap3d1	adaptor-related protein complex 3, delta 1 subunit
449	chr10	80798814	80798850	37	*	1.47301e-85	3.05205e-05	0.00745623	-0.00716845	Promoter (<=1kb)	chr10	80798735	80804922	6188	+	20222	uc011xiv.1	115	ENSMUSG00000020211	Sf3a2	splicing factor 3a, subunit 2
450	chr10	80799019	80799069	51	*	1.01135e-07	0.383058	0.00403116	0.379027	Promoter (<=1kb)	chr10	80798735	80804922	6188	+	20222	uc011xiv.1	334	ENSMUSG00000020211	Sf3a2	splicing factor 3a, subunit 2
451	chr10	80826632	80826724	93	*	1.08665e-05	7.14281e-05	0.00462778	-0.00456233	Promoter (<=1kb)	chr10	80826656	80829290	2635	+	18245	uc033frg.1	0	ENSMUSG00000035242	Oaz1	ornithine decarboxylase antizyme 1
452	chr10	80917938	80917941	4	*	1.16753e-07	3.5514e-05	0.00352941	-0.00349389	Promoter (<=1kb)	chr10	80901363	80918245	16883	-	16907	uc007gfk.1	304	ENSMUSG00000062075	Lmnb2	lamin B2
453	chr10	80917946	80917960	15	*	9.17963e-08	0.377446	0.00461431	0.372832	Promoter (<=1kb)	chr10	80901363	80918245	16883	-	16907	uc007gfk.1	285	ENSMUSG00000062075	Lmnb2	lamin B2
454	chr10	80917966	80917967	2	*	1.29427e-06	7.75032e-05	0.00855239	-0.00847489	Promoter (<=1kb)	chr10	80901363	80918245	16883	-	16907	uc007gfk.1	278	ENSMUSG00000062075	Lmnb2	lamin B2
455	chr10	80917968	80918044	77	*	1.2767e-05	0.365874	0.0102541	0.355496	Promoter (<=1kb)	chr10	80901363	80918245	16883	-	16907	uc007gfk.1	201	ENSMUSG00000062075	Lmnb2	lamin B2
456	chr10	80929177	80929274	98	*	1.77219e-05	0.0379287	0.00318968	0.0346973	Promoter (<=1kb)	chr10	80930091	80932204	2114	+	17873	uc007gfl.1	-914	ENSMUSG00000015312	Gadd45b	growth arrest and DNA-damage-inducible 45 beta
457	chr10	80929675	80929763	89	*	4.07017e-07	3.0462e-05	0.00128545	-0.00125499	Promoter (<=1kb)	chr10	80930091	80932204	2114	+	17873	uc007gfl.1	-416	ENSMUSG00000015312	Gadd45b	growth arrest and DNA-damage-inducible 45 beta
458	chr10	81037295	81037303	9	*	1.72438e-11	0.382572	0.000921693	0.38165	Promoter (<=1kb)	chr10	81028540	81037250	8711	-	106947	uc007gfr.1	-45	ENSMUSG00000046822	Slc39a3	solute carrier family 39 (zinc transporter), member 3
459	chr10	81037334	81037334	1	*	0.000162896	3.55224e-05	0.0010241	-0.000988578	Promoter (<=1kb)	chr10	81028540	81037250	8711	-	106947	uc007gfr.1	-84	ENSMUSG00000046822	Slc39a3	solute carrier family 39 (zinc transporter), member 3
460	chr10	81070038	81070075	38	*	1.1191e-06	0.00284631	4.2161e-05	0.00280415	Promoter (<=1kb)	chr10	81070083	81082360	12278	+	50492	uc007gfv.2	-45	ENSMUSG00000004929	Thop1	thimet oligopeptidase 1
461	chr10	81136092	81136138	47	*	4.11989e-05	6.70903e-05	0.00308028	-0.00301319	Promoter (<=1kb)	chr10	81136271	81151657	15387	+	16969	uc007gfz.1	-179	ENSMUSG00000035011	Zbtb7a	zinc finger and BTB domain containing 7a
462	chr10	81136464	81136486	23	*	1.73478e-06	0.00260262	4.32815e-05	0.00255934	Promoter (<=1kb)	chr10	81136472	81151657	15186	+	16969	uc007gga.2	0	ENSMUSG00000035011	Zbtb7a	zinc finger and BTB domain containing 7a
463	chr10	81136626	81136641	16	*	0.000444912	0.000351295	3.16578e-05	0.000319637	Promoter (<=1kb)	chr10	81136472	81151657	15186	+	16969	uc007gga.2	169	ENSMUSG00000035011	Zbtb7a	zinc finger and BTB domain containing 7a
464	chr10	81136797	81136947	151	*	3.76995e-07	3.02771e-05	0.0018232	-0.00179121	Promoter (<=1kb)	chr10	81136472	81151657	15186	+	16969	uc007gga.2	475	ENSMUSG00000035011	Zbtb7a	zinc finger and BTB domain containing 7a
465	chr10	81137160	81137197	38	*	1.33458e-06	0.00284668	4.48782e-05	0.00280346	Promoter (<=1kb)	chr10	81136472	81151657	15186	+	16969	uc007gga.2	725	ENSMUSG00000035011	Zbtb7a	zinc finger and BTB domain containing 7a
466	chr10	81137523	81137581	59	*	2.12429e-05	0.00119008	3.49407e-05	0.00115514	Promoter (<=1kb)	chr10	81138034	81151657	13624	+	16969	uc007ggb.1	-511	ENSMUSG00000035011	Zbtb7a	zinc finger and BTB domain containing 7a
467	chr10	81137998	81138058	61	*	8.66495e-05	0.340109	0.00980852	0.330301	Promoter (<=1kb)	chr10	81138034	81151657	13624	+	16969	uc007ggb.1	0	ENSMUSG00000035011	Zbtb7a	zinc finger and BTB domain containing 7a
468	chr10	81167520	81167551	32	*	4.43052e-13	0.384484	0.000614605	0.383879	Promoter (<=1kb)	chr10	81153966	81167720	13755	-	59004	uc007ggc.3	169	ENSMUSG00000004934	Pias4	protein inhibitor of activated STAT 4
469	chr10	81167624	81167737	114	*	7.63648e-05	0.000173792	0.00834851	-0.00814139	Promoter (<=1kb)	chr10	81153966	81167720	13755	-	59004	uc007ggc.3	0	ENSMUSG00000004934	Pias4	protein inhibitor of activated STAT 4
470	chr10	81176317	81176322	6	*	3.08993e-08	0.000128524	0.0156082	-0.0154796	Promoter (<=1kb)	chr10	81176631	81182509	5879	+	13629	uc007gge.2	-314	ENSMUSG00000034994	Eef2	eukaryotic translation elongation factor 2
471	chr10	81176626	81176676	51	*	3.44066e-07	0.00145002	3.0231e-05	0.00141978	Promoter (<=1kb)	chr10	81176631	81182509	5879	+	13629	uc007gge.2	0	ENSMUSG00000034994	Eef2	eukaryotic translation elongation factor 2
472	chr10	81266735	81266760	26	*	6.35754e-06	0.00353566	4.827e-05	0.00348739	Promoter (<=1kb)	chr10	81264722	81266926	2205	-	66047	uc007ggy.1	166	ENSMUSG00000034932	Mrpl54	mitochondrial ribosomal protein L54
473	chr10	81273872	81273886	15	*	8.91444e-05	0.989293	0.90169	0.0876032	Promoter (2-3kb)	chr10	81271597	81271687	91	+	100526465	uc011xje.1	2289	#N/A	Mir3057	microRNA 3057
474	chr10	81290982	81290983	2	*	0.00638377	0.386161	0.198206	0.187955	Promoter (<=1kb)	chr10	81273188	81291267	18080	-	27375	uc007gha.2	284	ENSMUSG00000034917	Tjp3	tight junction protein 3
475	chr10	81292850	81292927	78	*	1.10641e-11	0.384306	0.000781581	0.383525	Promoter (<=1kb)	chr10	81292963	81319974	27012	+	18717	uc007ghc.3	-113	ENSMUSG00000034902	Pip5k1c	phosphatidylinositol-4-phosphate 5-kinase, type 1 gamma
476	chr10	81320630	81320750	121	*	3.99513e-44	4.3066e-05	0.0306049	-0.0305535	Promoter (<=1kb)	chr10	81321103	81326251	5149	+	70312	uc007ghf.2	-473	ENSMUSG00000034889	Cactin	cactin, spliceosome C complex subunit
477	chr10	81350045	81350045	1	*	1.92566e-06	0.00335231	3.91416e-05	0.00331317	Promoter (<=1kb)	chr10	81346046	81350369	4324	-	15353	uc007ghj.2	324	ENSMUSG00000020232	Hmg20b	high mobility group 20B
478	chr10	81350107	81350341	235	*	0.000102296	4.74172e-05	0.00184215	-0.00179083	Promoter (<=1kb)	chr10	81346046	81350369	4324	-	15353	uc007ghj.2	28	ENSMUSG00000020232	Hmg20b	high mobility group 20B
479	chr10	81384252	81384252	1	*	1.02972e-06	0.0087269	0.000106152	0.00862075	Promoter (<=1kb)	chr10	81384428	81388352	3925	+	102115	uc007ghu.2	-176	ENSMUSG00000078440	Dohh	deoxyhypusine hydroxylase/monooxygenase
480	chr10	81384370	81384390	21	*	9.94723e-06	0.00125644	3.27207e-05	0.00122372	Promoter (<=1kb)	chr10	81384428	81388352	3925	+	102115	uc007ghu.2	-58	ENSMUSG00000078440	Dohh	deoxyhypusine hydroxylase/monooxygenase
481	chr10	81544667	81544839	173	*	0.000103125	3.0814e-05	0.000827544	-0.00079673	Promoter (<=1kb)	chr10	81528732	81545046	16315	-	14672	uc007gil.1	207	ENSMUSG00000034781	Gna11	guanine nucleotide binding protein, alpha 11
482	chr10	81559396	81559554	159	*	7.24341e-06	0.000630226	3.0551e-05	0.000600161	Promoter (<=1kb)	chr10	81559444	81566371	6928	+	14797	uc007gim.2	0	ENSMUSG00000054452	Aes	amino-terminal enhancer of split
483	chr10	81559633	81559738	106	*	0.000114369	3.47382e-05	0.00384537	-0.00381063	Promoter (<=1kb)	chr10	81559444	81566371	6928	+	14797	uc007gim.2	294	ENSMUSG00000054452	Aes	amino-terminal enhancer of split
484	chr10	81570860	81570993	134	*	0.000126196	3.58131e-05	0.00159333	-0.00155833	Distal Intergenic	chr10	81575287	81590473	15187	+	21886	uc007gio.2	-4427	ENSMUSG00000034771	Tle2	transducin-like enhancer of split 2, homolog of Drosophila E(spl)
485	chr10	81571068	81571075	8	*	6.32521e-05	0.000949654	3.58006e-05	0.000913853	Distal Intergenic	chr10	81575287	81590473	15187	+	21886	uc007gio.2	-4219	ENSMUSG00000034771	Tle2	transducin-like enhancer of split 2, homolog of Drosophila E(spl)
486	chr10	81643408	81643413	6	*	0.000252568	0.0150749	0.000870116	0.0142048	Promoter (2-3kb)	chr10	81640892	81645967	5076	+	70615	uc007gjd.1	2521	ENSMUSG00000054708	Ankrd24	ankyrin repeat domain 24
487	chr10	81643611	81643685	75	*	1.37829e-07	0.00198201	4.16194e-05	0.00194114	Promoter (2-3kb)	chr10	81640892	81645967	5076	+	70615	uc007gjd.1	2793	ENSMUSG00000054708	Ankrd24	ankyrin repeat domain 24
488	chr10	82699067	82699090	24	*	7.01212e-05	0.00408747	9.5896e-05	0.00399158	Promoter (<=1kb)	chr10	82699007	82741392	42386	+	67933	uc007gjt.1	83	ENSMUSG00000020246	Hcfc2	host cell factor C2
489	chr10	82699269	82699315	47	*	1.39453e-05	3.06689e-05	0.000944387	-0.000913718	Promoter (<=1kb)	chr10	82699007	82741392	42386	+	67933	uc007gjt.1	308	ENSMUSG00000020246	Hcfc2	host cell factor C2
490	chr10	82763473	82763596	124	*	9.08331e-05	3.12764e-05	0.000840969	-0.000809693	Promoter (<=1kb)	chr10	82748700	82764141	15442	-	18045	uc007gjv.1	545	ENSMUSG00000020248	Nfyb	nuclear transcription factor-Y beta
491	chr10	82763858	82763976	119	*	4.26983e-07	0.00294348	3.95997e-05	0.0029043	Promoter (<=1kb)	chr10	82748700	82764141	15442	-	18045	uc007gjv.1	165	ENSMUSG00000020248	Nfyb	nuclear transcription factor-Y beta
492	chr10	83533424	83533464	41	*	2.40568e-06	0.00511073	6.29572e-05	0.00504777	Promoter (<=1kb)	chr10	83487447	83534140	46694	-	216188	uc007gkh.2	676	ENSMUSG00000020256	Aldh1l2	aldehyde dehydrogenase 1 family, member L2
493	chr10	84533613	84533780	168	*	5.83067e-05	0.00167159	4.04198e-05	0.00160962	Promoter (<=1kb)	chr10	84526305	84533888	7584	-	216197	uc007gkq.1	108	ENSMUSG00000046841	Ckap4	cytoskeleton-associated protein 4
494	chr10	84576566	84576576	11	*	0.000301618	4.58321e-05	0.00121799	-0.00117216	Promoter (<=1kb)	chr10	84576947	84595300	18354	+	216198	uc007gkr.1	-381	ENSMUSG00000020034	Tcp11l2	t-complex 11 (mouse) like 2
495	chr10	85184926	85184985	60	*	2.55132e-11	0.00310933	3.38933e-05	0.00307544	Promoter (<=1kb)	chr10	85131700	85185054	53355	-	12952	uc007gle.1	69	ENSMUSG00000020038	Cry1	cryptochrome 1 (photolyase-like)
496	chr10	85185339	85185381	43	*	0.00149266	3.56058e-05	0.000791427	-0.000755821	Promoter (<=1kb)	chr10	85131700	85185054	53355	-	12952	uc007gle.1	-285	ENSMUSG00000020038	Cry1	cryptochrome 1 (photolyase-like)
497	chr10	85388019	85388028	10	*	8.49732e-08	3.47074e-05	0.0043311	-0.00429639	Promoter (1-2kb)	chr10	85386814	85660292	273479	+	74007	uc007glg.2	1214	ENSMUSG00000020042	Btbd11	BTB (POZ) domain containing 11
498	chr10	85871949	85871969	21	*	2.05319e-06	0.00476184	8.80077e-05	0.00467383	Promoter (<=1kb)	chr10	85871831	85884688	12858	+	103136	uc007gnc.2	138	ENSMUSG00000001785	Pwp1	PWP1 homolog (S. cerevisiae)
499	chr10	88731377	88731518	142	*	4.27992e-09	0.380739	0.00276013	0.377506	Promoter (<=1kb)	chr10	88731414	88743202	11789	+	104303	uc007grw.1	0	ENSMUSG00000060904	Arl1	ADP-ribosylation factor-like 1
500	chr10	89257828	89257828	1	*	6.58504e-07	0.0378707	0.000477175	0.0373935	Promoter (<=1kb)	chr10	88948994	89257790	308797	-	320091	uc007gsa.1	-38	ENSMUSG00000035189	Ano4	anoctamin 4
501	chr10	90135455	90135469	15	*	8.78837e-14	0.944531	0.999333	-0.0548024	Intron (uc033frv.1/77531, intron 8 of 24)	chr10	89873509	90972984	1099476	+	77531	uc033frv.1	261960	ENSMUSG00000058589	Anks1b	ankyrin repeat and sterile alpha motif domain containing 1B
502	chr10	90829384	90829408	25	*	8.11469e-05	0.00539831	0.438289	-0.432891	Promoter (<=1kb)	chr10	90829843	90923602	93760	+	77531	uc007gtd.1	-459	ENSMUSG00000058589	Anks1b	ankyrin repeat and sterile alpha motif domain containing 1B
503	chr10	91170740	91170816	77	*	0.00177328	0.00189439	7.97271e-05	0.0017914	Promoter (<=1kb)	chr10	91147571	91170550	22980	-	21917	uc007gtp.2	-190	ENSMUSG00000019961	Tmpo	thymopoietin
504	chr10	91171058	91171077	20	*	2.40038e-07	3.21709e-05	0.00144424	-0.00141206	Promoter (<=1kb)	chr10	91147571	91170550	22980	-	21917	uc007gtp.2	-508	ENSMUSG00000019961	Tmpo	thymopoietin
505	chr10	91171259	91171309	51	*	1.16983e-06	5.11558e-05	0.00513073	-0.00507828	Promoter (<=1kb)	chr10	91147571	91171619	24049	-	21917	uc007gtq.2	310	ENSMUSG00000019961	Tmpo	thymopoietin
506	chr10	91171626	91171698	73	*	1.8976e-08	0.00455869	4.1513e-05	0.00451789	Promoter (<=1kb)	chr10	91147571	91171619	24049	-	21917	uc007gtq.2	-7	ENSMUSG00000019961	Tmpo	thymopoietin
507	chr10	93160670	93160726	57	*	0.000228661	0.00134771	5.55255e-05	0.00129106	Promoter (<=1kb)	chr10	93160876	93225368	64493	+	237459	uc007guk.2	-206	ENSMUSG00000020015	Cdk17	cyclin-dependent kinase 17
508	chr10	93160901	93160917	17	*	7.86762e-06	0.00161383	4.05927e-05	0.001572	Promoter (<=1kb)	chr10	93160876	93225368	64493	+	237459	uc007guk.2	41	ENSMUSG00000020015	Cdk17	cyclin-dependent kinase 17
509	chr10	93310307	93310424	118	*	0.00010641	0.0010772	4.40168e-05	0.00104481	Promoter (<=1kb)	chr10	93247416	93311159	63744	-	13713	uc011xlt.1	735	ENSMUSG00000008398	Elk3	ELK3, member of ETS oncogene family
510	chr10	93311023	93311023	1	*	2.14068e-11	0.381118	0.00101872	0.380099	Promoter (<=1kb)	chr10	93247416	93311159	63744	-	13713	uc011xlt.1	136	ENSMUSG00000008398	Elk3	ELK3, member of ETS oncogene family
511	chr10	93311152	93311261	110	*	1.76824e-06	0.00105609	3.07459e-05	0.00102539	Promoter (<=1kb)	chr10	93247416	93311159	63744	-	13713	uc011xlt.1	0	ENSMUSG00000008398	Elk3	ELK3, member of ETS oncogene family
512	chr10	93453562	93453604	43	*	1.80448e-09	0.0032992	4.16979e-05	0.00325751	Promoter (<=1kb)	chr10	93453396	93464185	10790	+	16993	uc007guq.1	208	ENSMUSG00000015889	Lta4h	leukotriene A4 hydrolase
513	chr10	93640883	93640905	23	*	7.11003e-05	0.000721204	3.31916e-05	0.000688012	Promoter (<=1kb)	chr10	93641049	93745972	104924	+	57764	uc007gux.2	-166	ENSMUSG00000020019	Ntn4	netrin 4
514	chr10	93641208	93641216	9	*	1.21266e-06	0.00147952	3.45129e-05	0.001445	Promoter (<=1kb)	chr10	93641049	93745972	104924	+	57764	uc007gux.2	167	ENSMUSG00000020019	Ntn4	netrin 4
515	chr10	94035654	94035735	82	*	9.64668e-08	3.18299e-05	0.00192441	-0.00189258	Promoter (<=1kb)	chr10	93961522	94035799	74278	-	215008	uc007gvh.2	64	ENSMUSG00000036099	Vezt	vezatin, adherens junctions transmembrane protein
516	chr10	94148130	94148179	50	*	1.28788e-07	3.53199e-05	0.0030463	-0.00301084	Promoter (<=1kb)	chr10	94147931	94197214	49284	+	22025	uc007gvo.2	248	ENSMUSG00000005897	Nr2c1	nuclear receptor subfamily 2, group C, member 1
517	chr10	94148331	94148424	94	*	5.82652e-05	0.32761	0.00660121	0.321009	Promoter (<=1kb)	chr10	94147931	94197214	49284	+	22025	uc007gvo.2	493	ENSMUSG00000005897	Nr2c1	nuclear receptor subfamily 2, group C, member 1
518	chr10	95323997	95324043	47	*	1.4311e-07	0.372957	0.0068331	0.366625	Promoter (<=1kb)	chr10	95174746	95324097	149352	-	12905	uc007gwc.1	54	ENSMUSG00000045867	Cradd	CASP2 and RIPK1 domain containing adaptor with death domain
519	chr10	95416469	95416487	19	*	2.09911e-09	0.383673	0.00265259	0.381016	Promoter (<=1kb)	chr10	95411490	95416212	4723	-	216233	uc011xmd.1	-257	ENSMUSG00000020027	Socs2	suppressor of cytokine signaling 2
520	chr10	95416677	95416718	42	*	3.48444e-08	0.00304278	3.79737e-05	0.0030048	Promoter (<=1kb)	chr10	95411490	95416857	5368	-	216233	uc007gwg.2	139	ENSMUSG00000020027	Socs2	suppressor of cytokine signaling 2
521	chr10	95416971	95416971	1	*	2.12768e-10	0.382821	0.00141081	0.38141	Promoter (<=1kb)	chr10	95411490	95416857	5368	-	216233	uc007gwg.2	-114	ENSMUSG00000020027	Socs2	suppressor of cytokine signaling 2
522	chr10	95941155	95941155	1	*	1.43541e-16	0.38513	0.000211252	0.384919	Promoter (<=1kb)	chr10	95940663	96003003	62341	+	216238	uc011xmf.1	492	ENSMUSG00000036499	Eea1	early endosome antigen 1
523	chr10	95941237	95941287	51	*	2.96525e-13	3.38066e-05	0.00522271	-0.0051891	Promoter (<=1kb)	chr10	95940663	96003003	62341	+	216238	uc011xmf.1	624	ENSMUSG00000036499	Eea1	early endosome antigen 1
524	chr10	96617343	96617348	6	*	1.19204e-07	3.03833e-05	0.00221215	-0.00218176	Promoter (<=1kb)	chr10	96617001	96622811	5811	+	12226	uc007gww.2	347	ENSMUSG00000036478	Btg1	B cell translocation gene 1, anti-proliferative
525	chr10	96617363	96617377	15	*	1.01887e-11	0.385344	0.00124367	0.3841	Promoter (<=1kb)	chr10	96617001	96622811	5811	+	12226	uc007gww.2	376	ENSMUSG00000036478	Btg1	B cell translocation gene 1, anti-proliferative
526	chr10	98914089	98914283	195	*	3.5811e-08	0.194035	0.000131044	0.193678	Promoter (1-2kb)	chr10	98915152	99026143	110992	+	67972	uc007gxf.2	-1063	ENSMUSG00000019943	Atp2b1	ATPase, Ca++ transporting, plasma membrane 1
527	chr10	98914456	98914482	27	*	2.7364e-07	2.9706e-05	0.00134229	-0.00131259	Promoter (<=1kb)	chr10	98915152	99026143	110992	+	67972	uc007gxf.2	-696	ENSMUSG00000019943	Atp2b1	ATPase, Ca++ transporting, plasma membrane 1
528	chr10	98915444	98915449	6	*	0.00322981	2.9614e-05	0.000191252	-0.000161638	Promoter (<=1kb)	chr10	98915152	99026143	110992	+	67972	uc007gxf.2	297	ENSMUSG00000019943	Atp2b1	ATPase, Ca++ transporting, plasma membrane 1
529	chr10	98915469	98915521	53	*	1.37882e-13	0.385165	0.000506846	0.384659	Promoter (<=1kb)	chr10	98915152	99026143	110992	+	67972	uc007gxf.2	369	ENSMUSG00000019943	Atp2b1	ATPase, Ca++ transporting, plasma membrane 1
530	chr10	99107563	99107563	1	*	9.38367e-07	6.24246e-05	0.00588898	-0.00582655	Promoter (<=1kb)	chr10	99107741	99197988	90248	+	382406	uc007gxi.1	-178	ENSMUSG00000019952	Poc1b	POC1 centriolar protein homolog B (Chlamydomonas)
531	chr10	99107710	99107724	15	*	1.40626e-09	0.0154068	5.26208e-05	0.0153542	Promoter (<=1kb)	chr10	99107741	99197988	90248	+	382406	uc007gxi.1	-31	ENSMUSG00000019952	Poc1b	POC1 centriolar protein homolog B (Chlamydomonas)
532	chr10	99204133	99204139	7	*	0.000117886	0.018959	0.000320273	0.0186388	Distal Intergenic	chr10	99263231	99267489	4259	+	67603	uc007gxk.2	-59098	ENSMUSG00000019960	Dusp6	dual specificity phosphatase 6
533	chr10	99261460	99261776	317	*	3.56818e-07	3.06413e-05	0.00159789	-0.00156705	Promoter (1-2kb)	chr10	99263231	99267489	4259	+	67603	uc007gxk.2	-1771	ENSMUSG00000019960	Dusp6	dual specificity phosphatase 6
534	chr10	99262731	99262782	52	*	1.21559e-07	0.375993	0.00351197	0.372481	Promoter (<=1kb)	chr10	99263231	99267489	4259	+	67603	uc007gxk.2	-500	ENSMUSG00000019960	Dusp6	dual specificity phosphatase 6
535	chr10	100589020	100589037	18	*	2.31182e-06	0.377955	0.00785007	0.370105	Promoter (<=1kb)	chr10	100572274	100589259	16986	-	68281	uc007gxx.2	222	ENSMUSG00000046567	4930430F08Rik	RIKEN cDNA 4930430F08 gene
536	chr10	100589066	100589066	1	*	3.15465e-08	3.13772e-05	0.00428479	-0.00425342	Promoter (<=1kb)	chr10	100572274	100589259	16986	-	68281	uc007gxx.2	193	ENSMUSG00000046567	4930430F08Rik	RIKEN cDNA 4930430F08 gene
537	chr10	100589236	100589236	1	*	0.00336372	3.55208e-05	0.000298646	-0.000263125	Promoter (<=1kb)	chr10	100572274	100589259	16986	-	68281	uc007gxx.2	23	ENSMUSG00000046567	4930430F08Rik	RIKEN cDNA 4930430F08 gene
538	chr10	105573997	105574077	81	*	7.71682e-09	3.93917e-05	0.00370963	-0.00367058	Promoter (<=1kb)	chr10	105187664	105574479	386816	-	278279	uc007gym.1	402	ENSMUSG00000036019	Tmtc2	transmembrane and tetratricopeptide repeat containing 2
539	chr10	108162649	108162649	1	*	0.000108691	3.79008e-05	0.00133373	-0.00129583	Promoter (<=1kb)	chr10	108162400	108277575	115176	+	17931	uc007gzc.1	249	ENSMUSG00000019907	Ppp1r12a	protein phosphatase 1, regulatory (inhibitor) subunit 12A
540	chr10	108162731	108162773	43	*	5.2393e-15	0.384847	0.000342739	0.384504	Promoter (<=1kb)	chr10	108162400	108277575	115176	+	17931	uc007gzc.1	373	ENSMUSG00000019907	Ppp1r12a	protein phosphatase 1, regulatory (inhibitor) subunit 12A
541	chr10	108163005	108163012	8	*	0.00420634	0.0792078	0.00668504	0.0725228	Promoter (<=1kb)	chr10	108162400	108277575	115176	+	17931	uc007gzc.1	612	ENSMUSG00000019907	Ppp1r12a	protein phosphatase 1, regulatory (inhibitor) subunit 12A
542	chr10	108331901	108331980	80	*	1.83661e-07	5.38344e-05	0.00686683	-0.00681299	Promoter (<=1kb)	chr10	108332189	108414391	82203	+	114774	uc007gzf.1	-288	ENSMUSG00000035873	Pawr	PRKC, apoptosis, WT1, regulator
543	chr10	111009995	111009995	1	*	0.000536072	0.00400274	0.150558	-0.146556	Promoter (<=1kb)	chr10	110941780	111010066	68287	-	320150	uc033fsq.1	71	ENSMUSG00000035798	Zdhhc17	zinc finger, DHHC domain containing 17
544	chr10	111010072	111010167	96	*	0.000113901	0.000646413	3.36013e-05	0.00061232	Promoter (<=1kb)	chr10	110941780	111010066	68287	-	320150	uc033fsq.1	-6	ENSMUSG00000035798	Zdhhc17	zinc finger, DHHC domain containing 17
545	chr10	111506579	111506750	172	*	1.1295e-05	0.000849036	3.27607e-05	0.00081808	Promoter (<=1kb)	chr10	111506286	111508649	2364	+	21664	uc007haf.2	464	ENSMUSG00000020205	Phlda1	pleckstrin homology-like domain, family A, member 1
546	chr10	111972777	111972777	1	*	2.63743e-09	0.00711439	4.08337e-05	0.00707355	Promoter (<=1kb)	chr10	111972784	111988430	15647	+	52705	uc007hag.2	-7	ENSMUSG00000063334	Krr1	KRR1, small subunit (SSU) processome component, homolog (yeast)
547	chr10	111973035	111973141	107	*	0.000120024	3.29015e-05	0.00100293	-0.000970027	Promoter (<=1kb)	chr10	111972784	111988430	15647	+	52705	uc007hag.2	357	ENSMUSG00000063334	Krr1	KRR1, small subunit (SSU) processome component, homolog (yeast)
548	chr10	116474147	116474162	16	*	9.79702e-05	0.316961	0.00613649	0.310824	Promoter (<=1kb)	chr10	116417868	116473523	55656	-	58802	uc007hbw.1	-624	ENSMUSG00000054934	Kcnmb4	potassium large conductance calcium-activated channel, subfamily M, beta member 4
549	chr10	116581281	116581396	116	*	1.05137e-07	0.336732	0.00271762	0.333869	Promoter (<=1kb)	chr10	116485161	116581511	96351	-	72068	uc007hca.2	115	ENSMUSG00000020166	Cnot2	CCR4-NOT transcription complex, subunit 2
550	chr10	117147888	117147919	32	*	9.43808e-06	0.00171993	3.67956e-05	0.00168189	Promoter (<=1kb)	chr10	117070127	117148474	78348	-	327826	uc007hct.1	555	ENSMUSG00000020170	Frs2	fibroblast growth factor receptor substrate 2
551	chr10	117148071	117148071	1	*	1.08616e-06	0.0061361	6.47131e-05	0.00607139	Promoter (<=1kb)	chr10	117070127	117148474	78348	-	327826	uc007hct.1	403	ENSMUSG00000020170	Frs2	fibroblast growth factor receptor substrate 2
552	chr10	118868274	118868281	8	*	1.88614e-05	0.00208868	5.29123e-05	0.00203577	Promoter (<=1kb)	chr10	118859349	118868903	9555	-	69181	uc007hea.1	622	ENSMUSG00000028630	Dyrk2	dual-specificity tyrosine-(Y)-phosphorylation regulated kinase 2
553	chr10	118868661	118868661	1	*	1.01167e-08	0.384359	0.00343838	0.38092	Promoter (<=1kb)	chr10	118859349	118868903	9555	-	69181	uc007hea.1	242	ENSMUSG00000028630	Dyrk2	dual-specificity tyrosine-(Y)-phosphorylation regulated kinase 2
554	chr10	118868672	118868672	1	*	4.85267e-08	3.232e-05	0.00383357	-0.00380125	Promoter (<=1kb)	chr10	118859349	118868903	9555	-	69181	uc007hea.1	231	ENSMUSG00000028630	Dyrk2	dual-specificity tyrosine-(Y)-phosphorylation regulated kinase 2
555	chr10	118868673	118868725	53	*	1.12447e-08	0.383591	0.00340903	0.380151	Promoter (<=1kb)	chr10	118859349	118868903	9555	-	69181	uc007hea.1	178	ENSMUSG00000028630	Dyrk2	dual-specificity tyrosine-(Y)-phosphorylation regulated kinase 2
556	chr10	118868733	118868733	1	*	1.58374e-07	3.43747e-05	0.00327925	-0.00324488	Promoter (<=1kb)	chr10	118859349	118868903	9555	-	69181	uc007hea.1	170	ENSMUSG00000028630	Dyrk2	dual-specificity tyrosine-(Y)-phosphorylation regulated kinase 2
557	chr10	118869023	118869028	6	*	2.09421e-06	9.76945e-05	0.0147997	-0.014702	Promoter (<=1kb)	chr10	118859349	118868903	9555	-	69181	uc007hea.1	-120	ENSMUSG00000028630	Dyrk2	dual-specificity tyrosine-(Y)-phosphorylation regulated kinase 2
558	chr10	118869222	118869238	17	*	0.000153706	3.15108e-05	0.000791585	-0.000760075	Promoter (<=1kb)	chr10	118859349	118868903	9555	-	69181	uc007hea.1	-319	ENSMUSG00000028630	Dyrk2	dual-specificity tyrosine-(Y)-phosphorylation regulated kinase 2
559	chr10	119239495	119239496	2	*	0.00171475	0.00516494	0.173214	-0.168049	Promoter (<=1kb)	chr10	119198812	119240055	41244	-	71902	uc007hec.2	559	ENSMUSG00000020114	Cand1	cullin associated and neddylation disassociated 1
560	chr10	119239715	119239910	196	*	7.47889e-12	3.73537e-05	0.00997853	-0.009942	Promoter (<=1kb)	chr10	119198812	119240055	41244	-	71902	uc007hec.2	145	ENSMUSG00000020114	Cand1	cullin associated and neddylation disassociated 1
561	chr10	120744515	120744593	79	*	5.59855e-05	0.164861	0.416659	-0.251798	Distal Intergenic	chr10	120765732	120774485	8754	+	70874	uc007hff.2	-21217	ENSMUSG00000044544	4921513I03Rik	RIKEN cDNA 4921513I03 gene
562	chr10	121586412	121586466	55	*	2.53218e-05	3.95444e-05	0.00198484	-0.0019453	Promoter (<=1kb)	chr10	121546456	121586794	40339	-	56480	uc007hft.3	328	ENSMUSG00000020115	Tbk1	TANK-binding kinase 1
563	chr10	121625941	121626007	67	*	7.85455e-09	0.00732997	4.69403e-05	0.00728303	Promoter (<=1kb)	chr10	121587380	121626316	38937	-	73192	uc007hfv.1	309	ENSMUSG00000034667	Xpot	exportin, tRNA (nuclear export receptor for tRNAs)
564	chr10	121626198	121626207	10	*	0.000336504	5.87322e-05	0.0019419	-0.00188317	Promoter (<=1kb)	chr10	121587380	121626316	38937	-	73192	uc007hfv.1	109	ENSMUSG00000034667	Xpot	exportin, tRNA (nuclear export receptor for tRNAs)
565	chr10	121626557	121626676	120	*	7.8627e-07	0.00196149	3.62098e-05	0.00192602	Promoter (<=1kb)	chr10	121587380	121626316	38937	-	73192	uc007hfv.1	-241	ENSMUSG00000034667	Xpot	exportin, tRNA (nuclear export receptor for tRNAs)
566	chr10	121972913	121972950	38	*	0.000116201	0.979054	0.703856	0.273908	Intron (uc007hgb.2/117600, intron 21 of 21)	chr10	121780991	122047315	266325	-	117600	uc007hgb.2	74365	ENSMUSG00000020121	Srgap1	SLIT-ROBO Rho GTPase activating protein 1
567	chr10	126169163	126169212	50	*	4.4002e-05	0.772901	0.624345	0.148556	Distal Intergenic	chr10	125966219	125998013	31795	+	320398	uc007hhb.2	202993	ENSMUSG00000020105	Lrig3	leucine-rich repeats and immunoglobulin-like domains 3
568	chr10	126978639	126978644	6	*	0.000446056	0.00469685	0.176007	-0.17131	Promoter (<=1kb)	chr10	126978717	126999975	21259	+	52468	uc007hhj.2	-78	ENSMUSG00000078429	Ctdsp2	CTD (carboxy-terminal domain, RNA polymerase II, polypeptide A) small phosphatase 2
569	chr10	126978742	126978871	130	*	9.6792e-08	0.00183205	3.50017e-05	0.00179705	Promoter (<=1kb)	chr10	126978717	126999975	21259	+	52468	uc007hhj.2	154	ENSMUSG00000078429	Ctdsp2	CTD (carboxy-terminal domain, RNA polymerase II, polypeptide A) small phosphatase 2
570	chr10	126978918	126978954	37	*	4.99082e-07	4.34164e-05	0.00325073	-0.00320731	Promoter (<=1kb)	chr10	126978717	126999975	21259	+	52468	uc007hhj.2	237	ENSMUSG00000078429	Ctdsp2	CTD (carboxy-terminal domain, RNA polymerase II, polypeptide A) small phosphatase 2
571	chr10	126979178	126979219	42	*	7.97344e-07	0.00135039	3.13608e-05	0.00131903	Promoter (<=1kb)	chr10	126978717	126999975	21259	+	52468	uc007hhj.2	502	ENSMUSG00000078429	Ctdsp2	CTD (carboxy-terminal domain, RNA polymerase II, polypeptide A) small phosphatase 2
572	chr10	126979333	126979408	76	*	1.11713e-08	0.376025	0.00320491	0.372821	Promoter (<=1kb)	chr10	126978717	126999975	21259	+	52468	uc007hhj.2	691	ENSMUSG00000078429	Ctdsp2	CTD (carboxy-terminal domain, RNA polymerase II, polypeptide A) small phosphatase 2
573	chr10	127041252	127041301	50	*	0.000107573	0.00100679	0.0191231	-0.0181163	Promoter (<=1kb)	chr10	127032905	127041394	8490	-	100504608	uc029rjq.1	93	ENSMUSG00000080115	Mettl21b	methyltransferase like 21B
574	chr10	127041421	127041428	8	*	0.00115182	0.00180973	0.00012342	0.00168631	Promoter (<=1kb)	chr10	127032905	127041394	8490	-	100504608	uc029rjq.1	-27	ENSMUSG00000080115	Mettl21b	methyltransferase like 21B
575	chr10	127041761	127041826	66	*	0.00016143	0.00147309	4.89345e-05	0.00142752	Promoter (<=1kb)	chr10	127041932	127044002	2071	+	17299	uc007hhp.1	-171	ENSMUSG00000006732	Mettl1	methyltransferase like 1
576	chr10	127041987	127042016	30	*	7.02344e-12	0.00674325	3.67279e-05	0.00670652	Promoter (<=1kb)	chr10	127041932	127044002	2071	+	17299	uc007hhp.1	84	ENSMUSG00000006732	Mettl1	methyltransferase like 1
577	chr10	127042207	127042233	27	*	6.20982e-10	0.00550491	3.38821e-05	0.00547102	Promoter (<=1kb)	chr10	127041932	127044002	2071	+	17299	uc007hhp.1	301	ENSMUSG00000006732	Mettl1	methyltransferase like 1
578	chr10	127056755	127056755	1	*	0.00125387	0.769523	0.968971	-0.199448	Exon (uc007hhu.1/216438, exon 4 of 4)	chr10	127056050	127060184	4135	-	216438	uc007hhu.1	3429	ENSMUSG00000040502	March9	membrane-associated ring finger (C3HC4) 9
579	chr10	127063457	127063457	1	*	0.000184462	0.0121968	0.000247684	0.0119491	Promoter (<=1kb)	chr10	127063603	127067282	3680	+	12567	uc007hhv.2	-146	ENSMUSG00000006728	Cdk4	cyclin-dependent kinase 4
580	chr10	127063660	127063750	91	*	2.70778e-06	5.93675e-05	0.0060742	-0.00601483	Promoter (<=1kb)	chr10	127063603	127067282	3680	+	12567	uc007hhv.2	147	ENSMUSG00000006728	Cdk4	cyclin-dependent kinase 4
581	chr10	127064080	127064080	1	*	4.15792e-05	0.00521862	0.292851	-0.287632	Promoter (<=1kb)	chr10	127063603	127067282	3680	+	12567	uc007hhv.2	477	ENSMUSG00000006728	Cdk4	cyclin-dependent kinase 4
582	chr10	127070046	127070050	5	*	5.24416e-06	0.364038	0.00687987	0.357159	Promoter (<=1kb)	chr10	127067290	127070261	2972	-	67125	uc007hhw.1	211	ENSMUSG00000006736	Tspan31	tetraspanin 31
583	chr10	127120438	127120457	20	*	0.000415643	0.169367	0.0179063	0.151461	Promoter (<=1kb)	chr10	127094259	127121160	26902	-	216440	uc007hhz.2	703	ENSMUSG00000040462	Os9	amplified in osteosarcoma
584	chr10	127266383	127266387	5	*	0.000106404	0.00434968	0.231604	-0.227255	Promoter (<=1kb)	chr10	127266262	127281959	15698	+	69654	uc007hiu.2	125	ENSMUSG00000025410	Dctn2	dynactin 2
585	chr10	127266470	127266470	1	*	2.81115e-07	0.00175435	3.30011e-05	0.00172135	Promoter (<=1kb)	chr10	127266262	127281959	15698	+	69654	uc007hiu.2	208	ENSMUSG00000025410	Dctn2	dynactin 2
586	chr10	127266665	127266672	8	*	3.65312e-05	0.00108958	3.71393e-05	0.00105244	Promoter (<=1kb)	chr10	127266262	127281959	15698	+	69654	uc007hiu.2	410	ENSMUSG00000025410	Dctn2	dynactin 2
587	chr10	127339996	127339996	1	*	3.44235e-06	0.015184	0.000106348	0.0150776	Promoter (1-2kb)	chr10	127337840	127341318	3479	-	14632	uc007hjg.1	1322	ENSMUSG00000025407	Gli1	GLI-Kruppel family member GLI1
588	chr10	127357757	127357806	50	*	4.47988e-05	0.988482	0.767268	0.22226	Exon (uc007hjj.2/16325, exon 2 of 2)	chr10	127349402	127351772	2371	-	16326	uc011xps.1	-5985	ENSMUSG00000047492	Inhbe	inhibin beta E
589	chr10	127621707	127621727	21	*	2.99952e-05	4.97456e-05	0.00358	-0.00353025	Promoter (<=1kb)	chr10	127538158	127621148	82991	-	16971	uc007hjx.1	-559	ENSMUSG00000040249	Lrp1	low density lipoprotein receptor-related protein 1
590	chr10	127668243	127668266	24	*	0.000199661	3.30277e-05	0.000743179	-0.000710151	Promoter (1-2kb)	chr10	127667123	127701047	33925	+	210035	uc007hke.2	1143	ENSMUSG00000040195	Tmem194	transmembrane protein 194
591	chr10	127677072	127677150	79	*	1.03245e-12	0.384474	0.000668521	0.383824	Promoter (<=1kb)	chr10	127677065	127695166	18102	+	210035	uc007hkf.2	85	ENSMUSG00000040195	Tmem194	transmembrane protein 194
592	chr10	127739362	127739402	41	*	6.35784e-05	0.000550725	0.0570633	-0.0565126	Promoter (<=1kb)	chr10	127739538	127747339	7802	+	320080	uc007hkl.1	-176	ENSMUSG00000044617	Zbtb39	zinc finger and BTB domain containing 39
593	chr10	128035358	128035406	49	*	1.38355e-05	0.0017739	4.25374e-05	0.00173301	Promoter (<=1kb)	chr10	128035346	128048637	13292	+	17938	uc007hlb.2	60	ENSMUSG00000061315	Naca	nascent polypeptide-associated complex alpha polypeptide
594	chr10	128058765	128058886	122	*	2.38204e-10	0.0111945	4.19426e-05	0.0111355	Promoter (<=1kb)	chr10	128058982	128077254	18273	+	56351	uc007hld.1	-217	ENSMUSG00000071072	Ptges3	prostaglandin E synthase 3 (cytosolic)
595	chr10	128059016	128059101	86	*	5.59511e-05	0.000611764	3.07445e-05	0.000581019	Promoter (<=1kb)	chr10	128058982	128077254	18273	+	56351	uc007hld.1	119	ENSMUSG00000071072	Ptges3	prostaglandin E synthase 3 (cytosolic)
596	chr10	128059278	128059278	1	*	7.73957e-15	0.385098	0.000371705	0.384726	Promoter (<=1kb)	chr10	128058982	128077254	18273	+	56351	uc007hld.1	296	ENSMUSG00000071072	Ptges3	prostaglandin E synthase 3 (cytosolic)
597	chr10	128083641	128083685	45	*	9.45164e-06	9.60699e-05	0.00921309	-0.00911702	Promoter (<=1kb)	chr10	128083307	128090388	7082	+	11947	uc007hle.1	378	ENSMUSG00000025393	Atp5b	ATP synthase, H+ transporting mitochondrial F1 complex, beta subunit
598	chr10	128092527	128092576	50	*	5.02893e-05	0.00127731	4.30347e-05	0.00123595	Promoter (<=1kb)	chr10	128092460	128118655	26196	+	116848	uc007hli.1	116	ENSMUSG00000040054	Baz2a	bromodomain adjacent to zinc finger domain, 2A
599	chr10	128194514	128194531	18	*	4.77369e-11	0.378528	0.00115799	0.37737	Promoter (<=1kb)	chr10	128194635	128210004	15370	+	216456	uc007hlo.2	-121	ENSMUSG00000044005	Gls2	glutaminase 2 (liver, mitochondrial)
600	chr10	128194719	128194767	49	*	1.48617e-12	0.00234747	3.02471e-05	0.00231725	Promoter (<=1kb)	chr10	128194635	128210004	15370	+	216456	uc007hlo.2	132	ENSMUSG00000044005	Gls2	glutaminase 2 (liver, mitochondrial)
601	chr10	128232187	128232262	76	*	2.94196e-12	3.79442e-05	0.0100751	-0.0100426	Promoter (<=1kb)	chr10	128232063	128244829	12767	+	21853	uc007hlt.2	199	ENSMUSG00000039994	Timeless	timeless circadian clock 1
602	chr10	128578336	128578337	2	*	7.87774e-06	0.603064	0.758472	-0.155408	Intron (uc007hnm.1/13867, intron 16 of 27)	chr10	128584437	128584497	61	-	102465553	uc033ftj.1	6160	#N/A	Mir6917	microRNA 6917
603	chr10	128626462	128626553	92	*	1.77878e-13	0.384647	0.000550513	0.384097	Promoter (<=1kb)	chr10	128624529	128626506	1978	-	27370	uc007hno.2	0	ENSMUSG00000025362	Rps26	ribosomal protein S26
604	chr10	128805071	128805085	15	*	2.13675e-07	3.01735e-05	0.00161154	-0.00158137	Promoter (<=1kb)	chr10	128805580	128816107	10528	+	74330	uc007hok.1	-509	ENSMUSG00000025354	Dnajc14	DnaJ (Hsp40) homolog, subfamily C, member 14
605	chr10	128891490	128891516	27	*	1.74617e-06	0.00180114	3.9311e-05	0.00176183	Promoter (<=1kb)	chr10	128884546	128891718	7173	-	14561	uc007hot.1	202	ENSMUSG00000025352	Gdf11	growth differentiation factor 11
606	chr11	3202637	3202696	60	*	0.000142059	0.000957029	4.14553e-05	0.000915573	Promoter (<=1kb)	chr11	3202583	3220678	18096	+	74203	uc007hsd.2	113	ENSMUSG00000020454	Eif4enif1	eukaryotic translation initiation factor 4E nuclear import factor 1
607	chr11	3202848	3202902	55	*	1.16325e-07	4.20071e-05	0.00512347	-0.00508146	Promoter (<=1kb)	chr11	3202995	3244588	41594	+	74203	uc011xqo.1	-147	ENSMUSG00000020454	Eif4enif1	eukaryotic translation initiation factor 4E nuclear import factor 1
608	chr11	3266200	3266259	60	*	7.43013e-08	0.365756	0.00309691	0.362659	Promoter (<=1kb)	chr11	3249922	3266386	16465	-	13494	uc007hsh.1	127	ENSMUSG00000020457	Drg1	developmentally regulated GTP binding protein 1
609	chr11	3266271	3266286	16	*	0.000557243	3.03918e-05	0.000464761	-0.00043437	Promoter (<=1kb)	chr11	3249922	3266386	16465	-	13494	uc007hsh.1	100	ENSMUSG00000020457	Drg1	developmentally regulated GTP binding protein 1
610	chr11	3288884	3288976	93	*	4.71656e-08	0.000171122	0.0208548	-0.0206777	Promoter (<=1kb)	chr11	3289131	3295429	6299	+	56218	uc007hsj.2	-247	ENSMUSG00000020453	Patz1	POZ (BTB) and AT hook containing zinc finger 1
611	chr11	3408778	3408889	112	*	3.27101e-05	3.31608e-05	0.00120161	-0.00116801	Promoter (<=1kb)	chr11	3343297	3409238	65942	-	16886	uc007hsu.2	349	ENSMUSG00000020451	Limk2	LIM motif-containing protein kinase 2
612	chr11	3408966	3408966	1	*	9.98819e-05	0.181974	0.00573879	0.176235	Promoter (<=1kb)	chr11	3343297	3409238	65942	-	16886	uc007hsu.2	272	ENSMUSG00000020451	Limk2	LIM motif-containing protein kinase 2
613	chr11	4135507	4135577	71	*	4.37474e-06	0.00421194	5.94228e-05	0.00414872	Promoter (<=1kb)	chr11	4135814	4140078	4265	+	71673	uc011xqt.1	-307	ENSMUSG00000003581	Rnf215	ring finger protein 215
614	chr11	4160435	4160456	22	*	9.8918e-11	0.0058934	4.04663e-05	0.00585164	Promoter (<=1kb)	chr11	4160354	4171913	11560	+	67465	uc007huo.2	102	ENSMUSG00000002129	Sf3a1	splicing factor 3a, subunit 1
615	chr11	4160522	4160522	1	*	1.98651e-05	0.00295024	0.234283	-0.231332	Promoter (<=1kb)	chr11	4160354	4171913	11560	+	67465	uc007huo.2	168	ENSMUSG00000002129	Sf3a1	splicing factor 3a, subunit 1
616	chr11	4594399	4594417	19	*	0.000530158	3.63416e-05	0.000663117	-0.000626327	Promoter (<=1kb)	chr11	4480868	4594815	113948	-	74302	uc007hux.1	398	ENSMUSG00000034354	Mtmr3	myotubularin related protein 3
617	chr11	4594677	4594751	75	*	0.000172424	0.000407959	3.065e-05	0.000377244	Promoter (<=1kb)	chr11	4480868	4594815	113948	-	74302	uc007hux.1	64	ENSMUSG00000034354	Mtmr3	myotubularin related protein 3
618	chr11	5100242	5100246	5	*	8.33948e-09	0.37905	0.00301259	0.376037	Promoter (<=1kb)	chr11	5100165	5106100	5936	+	279766	uc007hwe.2	81	ENSMUSG00000034175	Rhbdd3	rhomboid domain containing 3
619	chr11	5261292	5261299	8	*	1.98065e-05	4.34146e-05	0.00183534	-0.00179193	Promoter (<=1kb)	chr11	5191553	5261610	70058	-	84035	uc007hwh.1	311	ENSMUSG00000020393	Kremen1	kringle containing transmembrane protein 1
620	chr11	5261464	5261548	85	*	4.06415e-05	0.000804414	3.28628e-05	0.000771774	Promoter (<=1kb)	chr11	5191553	5261610	70058	-	84035	uc007hwh.1	62	ENSMUSG00000020393	Kremen1	kringle containing transmembrane protein 1
621	chr11	5520542	5520542	1	*	2.87961e-05	0.000843461	3.38539e-05	0.000809607	Promoter (<=1kb)	chr11	5520641	5525993	5353	+	22433	uc007hwm.2	-99	ENSMUSG00000020484	Xbp1	X-box binding protein 1
622	chr11	5520756	5520756	1	*	0.00352949	0.00382517	0.113978	-0.110152	Promoter (<=1kb)	chr11	5520641	5525993	5353	+	22433	uc007hwm.2	115	ENSMUSG00000020484	Xbp1	X-box binding protein 1
623	chr11	5520911	5520944	34	*	2.44583e-10	0.37814	0.00142657	0.376713	Promoter (<=1kb)	chr11	5520641	5525993	5353	+	22433	uc007hwm.2	303	ENSMUSG00000020484	Xbp1	X-box binding protein 1
624	chr11	5521067	5521233	167	*	1.30422e-05	0.00090361	3.10865e-05	0.00087294	Promoter (<=1kb)	chr11	5520641	5525993	5353	+	22433	uc007hwm.2	592	ENSMUSG00000020484	Xbp1	X-box binding protein 1
625	chr11	5707202	5707244	43	*	7.18214e-07	0.00430937	4.82849e-05	0.00426109	Promoter (<=1kb)	chr11	5703983	5707699	3717	-	64660	uc007hwt.1	455	ENSMUSG00000020477	Mrps24	mitochondrial ribosomal protein S24
626	chr11	5707560	5707658	99	*	2.62807e-09	0.382846	0.00285685	0.37999	Promoter (<=1kb)	chr11	5703983	5707699	3717	-	64660	uc007hwt.1	41	ENSMUSG00000020477	Mrps24	mitochondrial ribosomal protein S24
627	chr11	5762402	5762433	32	*	9.62264e-06	4.10538e-05	0.00330264	-0.00326158	Promoter (<=1kb)	chr11	5713417	5762376	48960	-	72046	uc007hwv.1	-26	ENSMUSG00000049680	Urgcp	upregulator of cell proliferation
628	chr11	5887224	5887224	1	*	0.000330845	0.834824	0.692715	0.142109	Distal Intergenic	chr11	5872180	5878256	6077	-	18972	uc007hxk.2	-8968	ENSMUSG00000020471	Pold2	polymerase (DNA directed), delta 2, regulatory subunit
629	chr11	6389087	6389087	1	*	2.51334e-12	0.383178	0.000764004	0.382414	Distal Intergenic	chr11	6395125	6406162	11038	+	52915	uc007hym.1	-6038	ENSMUSG00000041164	Zmiz2	zinc finger, MIZ-type containing 2
630	chr11	6389408	6389412	5	*	0.00044009	0.258121	0.00372663	0.254394	Distal Intergenic	chr11	6395125	6406162	11038	+	52915	uc007hym.1	-5717	ENSMUSG00000041164	Zmiz2	zinc finger, MIZ-type containing 2
631	chr11	6389415	6389553	139	*	4.24483e-11	3.61487e-05	0.004648	-0.00461488	Distal Intergenic	chr11	6395125	6406162	11038	+	52915	uc007hym.1	-5710	ENSMUSG00000041164	Zmiz2	zinc finger, MIZ-type containing 2
632	chr11	6389642	6389682	41	*	1.70326e-10	0.435234	0.00114376	0.43409	Distal Intergenic	chr11	6395125	6406162	11038	+	52915	uc007hym.1	-5483	ENSMUSG00000041164	Zmiz2	zinc finger, MIZ-type containing 2
633	chr11	6415834	6415878	45	*	0.000167976	3.00265e-05	0.000585876	-0.00055585	Promoter (<=1kb)	chr11	6415870	6419810	3941	+	268373	uc007hyn.1	0	ENSMUSG00000071866	Ppia	peptidylprolyl isomerase A
634	chr11	6416097	6416173	77	*	2.18072e-07	0.0021794	3.24109e-05	0.00214699	Promoter (<=1kb)	chr11	6415871	6419810	3940	+	268373	uc007hyo.1	302	ENSMUSG00000071866	Ppia	peptidylprolyl isomerase A
635	chr11	6475326	6475417	92	*	2.41298e-05	3.13214e-05	0.00147949	-0.00144793	Promoter (<=1kb)	chr11	6467599	6476076	8478	-	19291	uc007hyr.3	659	ENSMUSG00000094483	Purb	purine rich element binding protein B
636	chr11	6528325	6528325	1	*	4.83794e-05	0.00799939	0.00018959	0.0078098	Promoter (<=1kb)	chr11	6525591	6528760	3170	-	100041286	uc007hyu.2	435	ENSMUSG00000085156	Gm11974	predicted gene 11974
637	chr11	6546784	6546793	10	*	0.000132962	0.000451328	3.01452e-05	0.000421183	Promoter (<=1kb)	chr11	6546887	6596761	49875	+	216527	uc007hyv.2	-103	ENSMUSG00000000378	Ccm2	cerebral cavernous malformation 2
638	chr11	6547333	6547339	7	*	1.55791e-06	0.423507	0.00546648	0.41804	Promoter (<=1kb)	chr11	6546887	6596761	49875	+	216527	uc007hyv.2	452	ENSMUSG00000000378	Ccm2	cerebral cavernous malformation 2
639	chr11	7212616	7212623	8	*	5.67267e-06	0.0455783	0.00114384	0.0444344	Promoter (1-2kb)	chr11	7206091	7213923	7833	-	16009	uc007hzi.2	1300	ENSMUSG00000020427	Igfbp3	insulin-like growth factor binding protein 3
640	chr11	11287658	11287658	1	*	0.000176098	0.751605	0.52395	0.227655	Intron (uc007iae.2/53604, intron 1 of 7)	chr11	11114744	11267721	152978	+	319922	uc007iad.2	172914	ENSMUSG00000050830	Vwc2	von Willebrand factor C domain containing 2
641	chr11	11685517	11685587	71	*	1.51556e-09	5.28868e-05	0.00675586	-0.00670282	Promoter (<=1kb)	chr11	11685925	11761424	75500	+	22778	uc007iaj.2	-408	ENSMUSG00000018654	Ikzf1	IKAROS family zinc finger 1
642	chr11	12025820	12025882	63	*	1.99733e-06	0.258919	0.544392	-0.285472	Promoter (<=1kb)	chr11	11970423	12026324	55902	-	14783	uc007ibc.1	442	ENSMUSG00000020176	Grb10	growth factor receptor bound protein 10
643	chr11	17211460	17211566	107	*	1.06189e-13	3.65202e-05	0.024194	-0.0241584	Promoter (<=1kb)	chr11	17203200	17211589	8390	-	66249	uc007icc.1	23	ENSMUSG00000020116	Pno1	partner of NOB1 homolog (S. cerevisiae)
644	chr11	17953337	17953337	1	*	4.48796e-05	3.21227e-05	0.00117107	-0.00113894	Promoter (<=1kb)	chr11	17938749	17953875	15127	-	68145	uc007icf.2	538	ENSMUSG00000016984	Etaa1	Ewing tumor-associated antigen 1
645	chr11	17953565	17953599	35	*	1.44114e-10	0.384744	0.00143879	0.383306	Promoter (<=1kb)	chr11	17938749	17953875	15127	-	68145	uc007icf.2	276	ENSMUSG00000016984	Etaa1	Ewing tumor-associated antigen 1
646	chr11	19020388	19020388	1	*	0.00137542	8.37713e-05	0.0016113	-0.00152753	Promoter (1-2kb)	chr11	18880428	19018969	138542	-	17268	uc007icl.2	-1419	ENSMUSG00000020160	Meis1	Meis homeobox 1
647	chr11	20332829	20332928	100	*	0.000745855	0.000439624	0.0149842	-0.0145446	Promoter (<=1kb)	chr11	20302180	20332713	30534	-	55963	uc007idb.2	-116	ENSMUSG00000020142	Slc1a4	solute carrier family 1 (glutamate/neutral amino acid transporter), member 4
648	chr11	20631631	20631644	14	*	2.38278e-06	0.000114052	0.0120215	-0.0119075	Promoter (<=1kb)	chr11	20631977	20653023	21047	+	58172	uc007ide.1	-346	ENSMUSG00000049800	Sertad2	SERTA domain containing 2
649	chr11	20741070	20741162	93	*	4.07243e-12	0.383961	0.000527538	0.383186	Promoter (<=1kb)	chr11	20685085	20741556	56472	-	216549	uc007idh.3	394	ENSMUSG00000049659	Aftph	aftiphilin
650	chr11	21091655	21091677	23	*	2.46441e-06	0.00278937	4.88049e-05	0.00274057	Promoter (<=1kb)	chr11	21091324	21143005	51682	+	67245	uc007idk.1	353	ENSMUSG00000020134	Peli1	pellino 1
651	chr11	21091813	21091879	67	*	5.67608e-05	0.00052493	2.96813e-05	0.000495354	Promoter (<=1kb)	chr11	21092118	21149402	57285	+	67245	uc007idm.1	-305	ENSMUSG00000020134	Peli1	pellino 1
652	chr11	21091956	21091959	4	*	2.94635e-05	2.99261e-05	0.00109008	-0.00106015	Promoter (<=1kb)	chr11	21092118	21149402	57285	+	67245	uc007idm.1	-162	ENSMUSG00000020134	Peli1	pellino 1
653	chr11	21572418	21572450	33	*	4.43254e-05	0.000804871	3.22525e-05	0.000772619	Promoter (<=1kb)	chr11	21572281	21697568	125288	+	216560	uc007idw.1	169	ENSMUSG00000020319	Wdpcp	WD repeat containing planar cell polarity effector
654	chr11	22286777	22286796	20	*	1.81703e-11	4.24121e-05	0.00502652	-0.00498411	Promoter (<=1kb)	chr11	22005826	22286795	280970	-	216565	uc007iea.2	0	ENSMUSG00000042302	Ehbp1	EH domain binding protein 1
655	chr11	22287104	22287209	106	*	9.18105e-09	0.381916	0.00233099	0.379585	Promoter (<=1kb)	chr11	22005826	22286795	280970	-	216565	uc007iea.2	-309	ENSMUSG00000042302	Ehbp1	EH domain binding protein 1
656	chr11	22512765	22512832	68	*	6.01889e-14	0.383629	0.000461268	0.383126	Promoter (<=1kb)	chr11	22512283	22519231	6949	+	103765	uc007iee.1	549	ENSMUSG00000049904	Tmem17	transmembrane protein 17
657	chr11	22990699	22990890	192	*	0.000155373	3.24175e-05	0.000981394	-0.000950056	Promoter (<=1kb)	chr11	22990593	22999876	9284	+	12464	uc007ien.1	297	ENSMUSG00000007739	Cct4	chaperonin containing Tcp1, subunit 4 (delta)
658	chr11	23067818	23067934	117	*	2.64604e-12	0.383911	0.000767718	0.383201	Distal Intergenic	chr11	23020000	23030788	10789	+	73873	uc007ies.1	47934	ENSMUSG00000049811	Fam161a	family with sequence similarity 161, member A
659	chr11	23665761	23665907	147	*	3.61418e-05	3.07451e-05	0.000884144	-0.000853374	Promoter (<=1kb)	chr11	23646479	23665935	19457	-	72129	uc007ifj.1	28	ENSMUSG00000020283	Pex13	peroxisomal biogenesis factor 13
660	chr11	28583531	28583531	1	*	0.000696439	0.020863	0.000388728	0.0204743	Promoter (<=1kb)	chr11	28385684	28584324	198641	-	216613	uc007igk.3	793	ENSMUSG00000032878	Ccdc85a	coiled-coil domain containing 85A
661	chr11	29526390	29526462	73	*	7.45317e-09	0.377258	0.00249217	0.374921	Promoter (<=1kb)	chr11	29526397	29545447	19051	+	76784	uc007ihc.2	0	ENSMUSG00000020459	Mtif2	mitochondrial translational initiation factor 2
662	chr11	29548316	29548346	31	*	7.89307e-11	6.51678e-05	0.0181771	-0.0181119	Promoter (<=1kb)	chr11	29545842	29548040	2199	-	78294	uc007ihg.1	-276	ENSMUSG00000020460	Rps27a	ribosomal protein S27A
663	chr11	30267669	30267763	95	*	0.0001378	0.0013496	5.06179e-05	0.00129899	Intron (uc007ihu.1/uc007ihu.1, intron 1 of 1)	chr11	30099395	30219772	120378	-	20742	uc007ihs.1	-47897	ENSMUSG00000020315	Sptbn1	spectrin beta, non-erythrocytic 1
664	chr11	30268060	30268060	1	*	0.000311604	0.00117177	5.09072e-05	0.00112086	5' UTR	chr11	30099395	30219772	120378	-	20742	uc007ihs.1	-48288	ENSMUSG00000020315	Sptbn1	spectrin beta, non-erythrocytic 1
665	chr11	30268168	30268169	2	*	0.00124031	0.00140929	7.44249e-05	0.00133487	5' UTR	chr11	30099395	30219772	120378	-	20742	uc007ihs.1	-48396	ENSMUSG00000020315	Sptbn1	spectrin beta, non-erythrocytic 1
666	chr11	30268343	30268343	1	*	0.00117867	3.0456e-05	0.000321656	-0.0002912	Distal Intergenic	chr11	30099395	30219772	120378	-	20742	uc007ihs.1	-48571	ENSMUSG00000020315	Sptbn1	spectrin beta, non-erythrocytic 1
667	chr11	30268357	30268361	5	*	4.06079e-13	0.384252	0.000576996	0.383675	Distal Intergenic	chr11	30099395	30219772	120378	-	20742	uc007ihs.1	-48585	ENSMUSG00000020315	Sptbn1	spectrin beta, non-erythrocytic 1
668	chr11	30268368	30268398	31	*	0.000129921	3.251e-05	0.000799841	-0.000767331	Distal Intergenic	chr11	30099395	30219772	120378	-	20742	uc007ihs.1	-48596	ENSMUSG00000020315	Sptbn1	spectrin beta, non-erythrocytic 1
669	chr11	30954487	30954564	78	*	2.81056e-11	0.375738	0.00105887	0.374763	Promoter (<=1kb)	chr11	30954398	31029760	75363	+	65257	uc007iid.1	166	ENSMUSG00000020305	Asb3	ankyrin repeat and SOCS box-containing 3
670	chr11	31370158	31370218	61	*	7.9526e-09	0.379356	0.00239332	0.376963	Promoter (<=1kb)	chr11	31359441	31370061	10621	-	20856	uc007iik.1	-97	ENSMUSG00000020303	Stc2	stanniocalcin 2
671	chr11	31370230	31370230	1	*	5.5057e-05	3.16891e-05	0.00106267	-0.00103098	Promoter (<=1kb)	chr11	31359441	31370061	10621	-	20856	uc007iik.1	-169	ENSMUSG00000020303	Stc2	stanniocalcin 2
672	chr11	31671826	31671888	63	*	4.44626e-05	0.000592294	2.98581e-05	0.000562387	Promoter (<=1kb)	chr11	31665150	31671862	6713	-	69556	uc007iim.1	0	ENSMUSG00000044502	Bod1	biorientation of chromosomes in cell division 1
673	chr11	31870664	31870724	61	*	1.08105e-10	0.00258154	3.46011e-05	0.00254738	Promoter (<=1kb)	chr11	31870940	31935635	64696	+	67579	uc007iir.2	-276	ENSMUSG00000020300	Cpeb4	cytoplasmic polyadenylation element binding protein 4
674	chr11	33147337	33147337	1	*	0.00480686	0.00492069	0.112535	-0.107614	Promoter (<=1kb)	chr11	33116978	33147400	30423	-	14172	uc007ikc.2	63	ENSMUSG00000057967	Fgf18	fibroblast growth factor 18
675	chr11	33147743	33147767	25	*	2.69286e-13	0.383885	0.000558065	0.383374	Promoter (<=1kb)	chr11	33116978	33147400	30423	-	14172	uc007ikc.2	-343	ENSMUSG00000057967	Fgf18	fibroblast growth factor 18
676	chr11	40734073	40734118	46	*	1.07081e-05	3.77461e-05	0.00300279	-0.00296507	Promoter (<=1kb)	chr11	40733661	40740046	6386	+	52653	uc007ily.3	457	ENSMUSG00000020328	Nudcd2	NudC domain containing 2
677	chr11	43474499	43474500	2	*	0.00118741	0.106185	0.0146264	0.0915586	Promoter (<=1kb)	chr11	43474306	43491525	17220	+	69183	uc007imr.2	194	ENSMUSG00000046491	C1qtnf2	C1q and tumor necrosis factor related protein 2
678	chr11	43747342	43747369	28	*	0.00026423	0.131051	0.21617	-0.0855413	Promoter (<=1kb)	chr11	43730006	43747973	17968	-	66827	uc007imx.1	604	ENSMUSG00000041278	Ttc1	tetratricopeptide repeat domain 1
679	chr11	43767050	43767135	86	*	5.03178e-06	0.00268322	5.08788e-05	0.00262345	Distal Intergenic	chr11	43730006	43747973	17968	-	66827	uc007imx.1	-19077	ENSMUSG00000041278	Ttc1	tetratricopeptide repeat domain 1
680	chr11	44470203	44470234	32	*	1.4577e-05	0.00450714	6.2989e-05	0.00444415	Promoter (<=1kb)	chr11	44454571	44470548	15978	-	79560	uc007ing.2	314	ENSMUSG00000041231	Ublcp1	ubiquitin-like domain containing CTD phosphatase 1
681	chr11	44470405	44470455	51	*	6.99614e-09	0.00277378	3.32849e-05	0.00274049	Promoter (<=1kb)	chr11	44454571	44470548	15978	-	79560	uc007ing.2	93	ENSMUSG00000041231	Ublcp1	ubiquitin-like domain containing CTD phosphatase 1
682	chr11	44519110	44519167	58	*	3.87917e-06	0.0157606	0.000273378	0.0150069	Promoter (<=1kb)	chr11	44518964	44565520	46557	+	74315	uc007inh.2	203	ENSMUSG00000019189	Rnf145	ring finger protein 145
683	chr11	44519212	44519212	1	*	0.000113276	0.00690168	0.304271	-0.297369	Promoter (<=1kb)	chr11	44519377	44554977	35601	+	74315	uc007ini.2	-165	ENSMUSG00000019189	Rnf145	ring finger protein 145
684	chr11	44519405	44519405	1	*	0.00231926	0.00195138	0.0493559	-0.0474045	Promoter (<=1kb)	chr11	44519377	44554977	35601	+	74315	uc007ini.2	28	ENSMUSG00000019189	Rnf145	ring finger protein 145
685	chr11	44520043	44520114	72	*	2.18924e-05	3.57529e-05	0.00212079	-0.00208504	Promoter (<=1kb)	chr11	44519377	44554977	35601	+	74315	uc007ini.2	737	ENSMUSG00000019189	Rnf145	ring finger protein 145
686	chr11	45944838	45944874	37	*	7.96535e-05	3.11174e-05	0.000884948	-0.000853831	Promoter (<=1kb)	chr11	45928269	45944935	16667	-	72290	uc007ins.1	61	ENSMUSG00000044847	Lsm11	U7 snRNP-specific Sm-like protein LSM11
687	chr11	48799801	48799853	53	*	3.60428e-05	0.00285056	6.03709e-05	0.00279019	Promoter (<=1kb)	chr11	48800360	48806241	5882	+	14694	uc007ipa.1	-559	ENSMUSG00000020372	Gnb2l1	guanine nucleotide binding protein (G protein), beta polypeptide 2 like 1
688	chr11	49244171	49244241	71	*	1.53668e-05	0.00356569	5.64169e-05	0.00350927	Promoter (<=1kb)	chr11	49244191	49263024	18834	+	17308	uc007iqb.2	0	ENSMUSG00000020346	Mgat1	mannoside acetylglucosaminyltransferase 1
689	chr11	49712494	49712601	108	*	7.56813e-05	3.08286e-05	0.000864912	-0.000834317	Promoter (<=1kb)	chr11	49671497	49712722	41226	-	104625	uc007irb.3	121	ENSMUSG00000020362	Cnot6	CCR4-NOT transcription complex, subunit 6
690	chr11	50224714	50224714	1	*	9.30377e-05	0.026957	0.000576466	0.0263806	Promoter (<=1kb)	chr11	50225335	50235103	9769	+	103534	uc007iry.2	-621	ENSMUSG00000036620	Mgat4b	mannoside acetylglucosaminyltransferase 4, isoenzyme B
691	chr11	50292183	50292253	71	*	0.000430304	0.000399418	0.0132677	-0.0128683	Promoter (<=1kb)	chr11	50255635	50292336	36702	-	103806	uc007isd.2	83	ENSMUSG00000050567	Maml1	mastermind like 1 (Drosophila)
692	chr11	50292335	50292394	60	*	8.62995e-14	0.385207	0.000491053	0.384725	Promoter (<=1kb)	chr11	50255635	50292336	36702	-	103806	uc007isd.2	0	ENSMUSG00000050567	Maml1	mastermind like 1 (Drosophila)
693	chr11	50359706	50359749	44	*	7.14002e-11	0.00385618	4.20103e-05	0.00381417	Promoter (1-2kb)	chr11	50357785	50357879	95	-	100049547	uc011xuh.1	-1827	ENSMUSG00000076450	Mir804	microRNA 804
694	chr11	50827692	50827786	95	*	8.11986e-10	0.382844	0.00167669	0.381167	Promoter (<=1kb)	chr11	50811085	50827731	16647	-	30944	uc007isq.1	0	ENSMUSG00000044807	Zfp354c	zinc finger protein 354C
695	chr11	51605956	51606022	67	*	1.21907e-05	0.00121205	3.87711e-05	0.00117328	Promoter (<=1kb)	chr11	51600100	51606881	6782	-	15384	uc007itz.1	859	ENSMUSG00000020358	Hnrnpab	heterogeneous nuclear ribonucleoprotein A/B
696	chr11	51606088	51606110	23	*	0.000455166	0.000144616	0.00549516	-0.00533732	Promoter (<=1kb)	chr11	51600100	51606881	6782	-	15384	uc007itz.1	771	ENSMUSG00000020358	Hnrnpab	heterogeneous nuclear ribonucleoprotein A/B
697	chr11	51606976	51607045	70	*	2.85884e-05	0.0010001	3.55427e-05	0.000964553	Promoter (<=1kb)	chr11	51600100	51606881	6782	-	15384	uc007itz.1	-95	ENSMUSG00000020358	Hnrnpab	heterogeneous nuclear ribonucleoprotein A/B
698	chr11	51756274	51756343	70	*	3.09487e-07	3.39127e-05	0.00194757	-0.00191366	Promoter (<=1kb)	chr11	51692263	51756834	64572	-	77371	uc007iui.1	491	ENSMUSG00000036391	Sec24a	Sec24 related gene family, member A (S. cerevisiae)
699	chr11	51856661	51856860	200	*	7.53482e-11	0.383646	0.000535748	0.382618	Promoter (<=1kb)	chr11	51813456	51857481	44026	-	76901	uc007iuq.1	621	ENSMUSG00000020387	Jade2	jade family PHD finger 2
700	chr11	51856952	51857020	69	*	7.09563e-05	3.99962e-05	0.0026237	-0.00258371	Promoter (<=1kb)	chr11	51813456	51857481	44026	-	76901	uc007iuq.1	461	ENSMUSG00000020387	Jade2	jade family PHD finger 2
701	chr11	52004235	52004370	136	*	2.55333e-11	0.00376828	3.40835e-05	0.00373413	Promoter (<=1kb)	chr11	52004254	52027559	23306	+	213084	uc007iuv.2	0	ENSMUSG00000020389	Cdkl3	cyclin-dependent kinase-like 3
702	chr11	52099512	52099647	136	*	3.24924e-07	0.00286989	3.7382e-05	0.00282792	Promoter (<=1kb)	chr11	52098824	52122749	23926	+	19052	uc007ivb.1	823	ENSMUSG00000020349	Ppp2ca	protein phosphatase 2 (formerly 2A), catalytic subunit, alpha isoform
703	chr11	53300339	53300399	61	*	6.89989e-08	4.00482e-05	0.00515162	-0.00511635	Promoter (<=1kb)	chr11	53259814	53300479	40666	-	15525	uc007ivq.1	80	ENSMUSG00000020361	Hspa4	heat shock protein 4
704	chr11	53567612	53567675	64	*	4.6769e-07	3.00887e-05	0.0014561	-0.00142601	Promoter (<=1kb)	chr11	53567369	53604246	36878	+	16568	uc007iwl.2	306	ENSMUSG00000018395	Kif3a	kinesin family member 3A
705	chr11	53706842	53706846	5	*	0.000107734	0.0029265	7.34054e-05	0.0028531	Promoter (<=1kb)	chr11	53649519	53707319	57801	-	19360	uc007iwt.1	473	ENSMUSG00000020380	Rad50	RAD50 homolog (S. cerevisiae)
706	chr11	53980062	53980201	140	*	9.79337e-08	0.00226216	4.0392e-05	0.00221968	Promoter (<=1kb)	chr11	53950824	53980027	29204	-	56517	uc007ixd.1	-35	ENSMUSG00000063652	Slc22a21	solute carrier family 22 (organic cation transporter), member 21
707	chr11	54028312	54028393	82	*	4.82571e-06	0.000854943	3.31396e-05	0.000818794	Promoter (<=1kb)	chr11	53983126	54028090	44965	-	30805	uc007ixe.1	-222	ENSMUSG00000020334	Slc22a4	solute carrier family 22 (organic cation transporter), member 4
708	chr11	54787891	54787893	3	*	3.14779e-05	0.00784135	0.000105951	0.0077354	Promoter (<=1kb)	chr11	54717415	54787703	70289	-	72729	uc007iyf.2	-188	ENSMUSG00000052298	Cdc42se2	CDC42 small effector 2
709	chr11	54955895	54955895	1	*	7.65193e-08	0.3853	0.00524433	0.380056	Promoter (<=1kb)	chr11	54916796	54956178	39383	-	57783	uc007iyq.3	283	ENSMUSG00000020400	Tnip1	TNFAIP3 interacting protein 1
710	chr11	54955915	54956038	124	*	2.21146e-05	3.45155e-05	0.00215441	-0.00211768	Promoter (<=1kb)	chr11	54916796	54956178	39383	-	57783	uc007iyq.3	140	ENSMUSG00000020400	Tnip1	TNFAIP3 interacting protein 1
711	chr11	54956099	54956100	2	*	5.90053e-08	0.00588546	3.88996e-05	0.00584656	Promoter (<=1kb)	chr11	54916796	54956178	39383	-	57783	uc007iyq.3	78	ENSMUSG00000020400	Tnip1	TNFAIP3 interacting protein 1
712	chr11	54956168	54956169	2	*	0.000848926	0.00749766	0.25902	-0.251522	Promoter (<=1kb)	chr11	54916796	54956178	39383	-	57783	uc007iyq.3	9	ENSMUSG00000020400	Tnip1	TNFAIP3 interacting protein 1
713	chr11	54956218	54956289	72	*	8.51318e-07	0.00261159	4.49793e-05	0.00256661	Promoter (<=1kb)	chr11	54916796	54956178	39383	-	57783	uc007iyq.3	-40	ENSMUSG00000020400	Tnip1	TNFAIP3 interacting protein 1
714	chr11	55078068	55078102	35	*	3.17659e-06	4.36924e-05	0.00196731	-0.00192361	Promoter (<=1kb)	chr11	55049738	55078131	28394	-	52570	uc007iyu.1	29	ENSMUSG00000049588	Ccdc69	coiled-coil domain containing 69
715	chr11	55098023	55098071	49	*	2.86603e-08	0.382845	0.00538735	0.377458	Promoter (<=1kb)	chr11	55097985	55113028	15044	+	14667	uc007iyw.2	86	ENSMUSG00000000594	Gm2a	GM2 ganglioside activator protein
716	chr11	57518355	57518358	4	*	0.000137104	2.97341e-05	0.000620359	-0.000590624	Promoter (<=1kb)	chr11	57482990	57518644	35655	-	67726	uc007izt.2	286	ENSMUSG00000020523	Fam114a2	family with sequence similarity 114, member A2
717	chr11	57518484	57518589	106	*	1.04228e-07	0.0266785	0.00865255	0.0201088	Promoter (<=1kb)	chr11	57482990	57518644	35655	-	67726	uc007izt.2	55	ENSMUSG00000020523	Fam114a2	family with sequence similarity 114, member A2
718	chr11	57518830	57518873	44	*	0.00011901	3.14216e-05	0.00078318	-0.000751758	Promoter (<=1kb)	chr11	57518665	57529089	10425	+	216760	uc007izw.1	208	ENSMUSG00000020522	Mfap3	microfibrillar-associated protein 3
719	chr11	57801493	57801735	243	*	3.86415e-07	0.00368117	4.03453e-05	0.00364684	Promoter (<=1kb)	chr11	57801637	57810615	8979	+	50724	uc007jae.1	0	ENSMUSG00000020519	Sap30l	SAP30-like
720	chr11	58104092	58104183	92	*	0.000115284	3.28717e-05	0.000825881	-0.000793152	Promoter (<=1kb)	chr11	58104153	58118594	14442	+	69125	uc007jaj.1	0	ENSMUSG00000020515	Cnot8	CCR4-NOT transcription complex, subunit 8
721	chr11	58959994	58960084	91	*	1.94651e-05	3.25296e-05	0.00161763	-0.00158595	Intron (uc007jcu.1/56631, intron 1 of 6)	chr11	58963781	58971729	7949	+	56631	uc007jcv.1	-3787	ENSMUSG00000036964	Trim17	tripartite motif-containing 17
722	chr11	59006812	59006812	1	*	0.00011868	0.771451	0.848065	-0.076614	Exon (uc029rlw.1/380698, exon 86 of 104)	chr11	59012141	59029586	17446	-	380698	uc011xvk.1	22774	ENSMUSG00000061462	Obscn	obscurin, cytoskeletal calmodulin and titin-interacting RhoGEF
723	chr11	59163684	59163736	53	*	1.61044e-06	3.07576e-05	0.000954698	-0.000923941	Promoter (<=1kb)	chr11	59155369	59163745	8377	-	216792	uc007jdd.2	9	ENSMUSG00000049287	Iba57	IBA57, iron-sulfur cluster assembly homolog (S. cerevisiae)
724	chr11	59177305	59177305	1	*	0.000935716	0.352848	0.237132	0.115716	Exon (uc007jde.2/118454, exon 2 of 2)	chr11	59175564	59182826	7263	-	118454	uc007jde.2	5521	ENSMUSG00000043448	Gjc2	gap junction protein, gamma 2
725	chr11	59208582	59208651	70	*	2.71255e-07	0.00275052	3.59665e-05	0.00271455	Promoter (<=1kb)	chr11	59208361	59210734	2374	+	67862	uc007jdl.1	290	ENSMUSG00000020441	2310033P09Rik	RIKEN cDNA 2310033P09 gene
726	chr11	59306699	59306727	29	*	3.01241e-06	0.00166668	3.32357e-05	0.00163344	Promoter (<=1kb)	chr11	59306930	59333552	26623	+	216795	uc007jdq.1	-231	ENSMUSG00000000126	Wnt9a	wingless-type MMTV integration site family, member 9A
727	chr11	59306767	59306812	46	*	4.31487e-05	3.11951e-05	0.0010037	-0.000972505	Promoter (<=1kb)	chr11	59306930	59333552	26623	+	216795	uc007jdq.1	-163	ENSMUSG00000000126	Wnt9a	wingless-type MMTV integration site family, member 9A
728	chr11	59506311	59506322	12	*	0.000159059	0.00101113	4.11854e-05	0.000969949	Promoter (<=1kb)	chr11	59485521	59506640	21120	-	268417	uc007jea.2	318	ENSMUSG00000020472	Zkscan17	zinc finger with KRAB and SCAN domains 17
729	chr11	59506446	59506526	81	*	0.000431238	4.8646e-05	0.00118594	-0.00113729	Promoter (<=1kb)	chr11	59485521	59506640	21120	-	268417	uc007jea.2	114	ENSMUSG00000020472	Zkscan17	zinc finger with KRAB and SCAN domains 17
730	chr11	59787417	59787445	29	*	5.56038e-07	0.0114369	0.000102049	0.0113348	Promoter (<=1kb)	chr11	59783893	59787222	3330	-	194908	uc056yla.1	-195	ENSMUSG00000043648	Pld6	phospholipase D family, member 6
731	chr11	60115342	60115366	25	*	4.55436e-14	0.383647	0.000416749	0.38323	Intron (uc007jfk.1/19377, intron 1 of 5)	chr11	60105013	60199195	94183	+	19377	uc007jfk.1	10353	ENSMUSG00000062115	Rai1	retinoic acid induced 1
732	chr11	60417504	60417509	6	*	3.87008e-06	3.05434e-05	0.00243723	-0.00240669	Promoter (<=1kb)	chr11	60417145	60445277	28133	+	66771	uc007jfw.2	364	ENSMUSG00000018415	Gid4	GID complex subunit 4, VID24 homolog (S. cerevisiae)
733	chr11	60417526	60417603	78	*	1.48632e-06	0.384364	0.0110571	0.373199	Promoter (<=1kb)	chr11	60417145	60445277	28133	+	66771	uc007jfw.2	458	ENSMUSG00000018415	Gid4	GID complex subunit 4, VID24 homolog (S. cerevisiae)
734	chr11	60726905	60726975	71	*	6.28455e-12	0.384436	0.000883488	0.383552	Promoter (<=1kb)	chr11	60714146	60727263	13118	-	14248	uc007jgh.2	288	ENSMUSG00000002812	Flii	flightless I homolog (Drosophila)
735	chr11	61266916	61267178	263	*	5.19227e-05	4.83127e-05	0.00289031	-0.00284268	Promoter (<=1kb)	chr11	61244752	61267186	22435	-	11671	uc007jhf.2	8	ENSMUSG00000010025	Aldh3a2	aldehyde dehydrogenase family 3, subfamily A2
736	chr11	62249424	62249486	63	*	8.08521e-06	0.000114834	0.00483898	-0.00473471	Promoter (<=1kb)	chr11	62248984	62266452	17469	+	11541	uc007jio.1	502	ENSMUSG00000018500	Adora2b	adenosine A2b receptor
737	chr11	62457226	62457257	32	*	2.19664e-06	0.00197349	3.92676e-05	0.00193423	Promoter (<=1kb)	chr11	62384718	62457332	72615	-	20185	uc029rmb.1	75	ENSMUSG00000018501	Ncor1	nuclear receptor co-repressor 1
738	chr11	62457643	62457676	34	*	7.44777e-07	0.328939	0.00463448	0.324305	Promoter (<=1kb)	chr11	62384783	62457806	73024	-	20185	uc007jjb.1	130	ENSMUSG00000018501	Ncor1	nuclear receptor co-repressor 1
739	chr11	62457693	62457693	1	*	0.0045607	0.000145034	0.00300132	-0.00285628	Promoter (<=1kb)	chr11	62384783	62457806	73024	-	20185	uc007jjb.1	113	ENSMUSG00000018501	Ncor1	nuclear receptor co-repressor 1
740	chr11	62602719	62602768	50	*	0.000466495	0.000173309	0.00668275	-0.00651125	Promoter (<=1kb)	chr11	62602877	62604806	1930	+	69221	uc007jjk.1	-158	ENSMUSG00000086841	2410006H16Rik	RIKEN cDNA 2410006H16 gene
741	chr11	62602930	62602971	42	*	2.33231e-07	0.381707	0.00450233	0.377204	Promoter (<=1kb)	chr11	62602877	62604806	1930	+	69221	uc007jjk.1	94	ENSMUSG00000086841	2410006H16Rik	RIKEN cDNA 2410006H16 gene
742	chr11	62879451	62879660	210	*	1.58858e-05	0.00245727	5.19866e-05	0.00240356	Promoter (<=1kb)	chr11	62879490	62895184	15695	+	67510	uc007jkh.1	0	ENSMUSG00000014177	Tvp23b	trans-golgi network vesicle protein 23B
743	chr11	62879880	62879899	20	*	4.96208e-05	3.43128e-05	0.00142491	-0.0013906	Promoter (<=1kb)	chr11	62879490	62895184	15695	+	67510	uc007jkh.1	409	ENSMUSG00000014177	Tvp23b	trans-golgi network vesicle protein 23B
744	chr11	63132681	63132681	1	*	1.63445e-05	0.00170176	3.96999e-05	0.00166206	Promoter (<=1kb)	chr11	63132569	63159547	26979	+	18858	uc056ylm.1	112	ENSMUSG00000018217	Pmp22	peripheral myelin protein 22
745	chr11	65787765	65787765	1	*	3.61251e-05	0.206567	0.00361236	0.202955	Promoter (<=1kb)	chr11	65688244	65788297	100054	-	26398	uc007jlb.1	532	ENSMUSG00000033352	Map2k4	mitogen-activated protein kinase kinase 4
746	chr11	65787768	65787768	1	*	6.88711e-05	4.4122e-05	0.00212531	-0.00208118	Promoter (<=1kb)	chr11	65688244	65788297	100054	-	26398	uc007jlb.1	529	ENSMUSG00000033352	Map2k4	mitogen-activated protein kinase kinase 4
747	chr11	65787773	65787798	26	*	5.61182e-09	0.377779	0.00217527	0.375604	Promoter (<=1kb)	chr11	65688244	65788297	100054	-	26398	uc007jlb.1	499	ENSMUSG00000033352	Map2k4	mitogen-activated protein kinase kinase 4
748	chr11	65788018	65788121	104	*	3.13342e-05	0.00112189	3.38389e-05	0.00108805	Promoter (<=1kb)	chr11	65688244	65788297	100054	-	26398	uc007jlb.1	176	ENSMUSG00000033352	Map2k4	mitogen-activated protein kinase kinase 4
749	chr11	67053122	67053150	29	*	9.08824e-09	0.380428	0.00333168	0.37708	Promoter (<=1kb)	chr11	67052670	67067440	14771	+	52892	uc007jlu.1	480	ENSMUSG00000069844	Sco1	SCO cytochrome oxidase deficient homolog 1 (yeast)
750	chr11	67113266	67113291	26	*	3.68266e-05	0.470592	0.275884	0.195184	Exon (uc007jlz.1/74184, exon 4 of 4)	chr11	67112461	67116841	4381	-	74184	uc007jlz.1	3550	ENSMUSG00000087410	2310065F04Rik	RIKEN cDNA 2310065F04 gene
751	chr11	68348126	68348126	1	*	0.00360285	0.723505	0.872434	-0.148929	Intron (uc007jnm.1/18208, intron 5 of 6)	chr11	68209364	68386826	177463	-	18208	uc007jnm.1	38700	ENSMUSG00000020902	Ntn1	netrin 1
752	chr11	68853042	68853114	73	*	7.55852e-13	0.382669	0.00066714	0.382059	Promoter (<=1kb)	chr11	68821446	68853131	31686	-	83431	uc007joc.3	17	ENSMUSG00000018736	Ndel1	nuclear distribution gene E-like homolog 1 (A. nidulans)
753	chr11	69045677	69045722	46	*	4.26123e-06	0.00358744	5.84862e-05	0.00352895	Promoter (<=1kb)	chr11	69045643	69051662	6020	+	20877	uc007jpa.1	79	ENSMUSG00000020897	Aurkb	aurora kinase B
754	chr11	69059329	69059329	1	*	0.00290833	0.000333521	0.00910753	-0.00877401	Promoter (<=1kb)	chr11	69059775	69061576	1802	+	71923	uc007jpb.1	-446	ENSMUSG00000045176	Borcs6	BLOC-1 related complex subunit 6
755	chr11	69059832	69059845	14	*	6.74836e-08	0.000838807	0.0189746	-0.0181358	Promoter (<=1kb)	chr11	69059775	69061576	1802	+	71923	uc007jpb.1	70	ENSMUSG00000045176	Borcs6	BLOC-1 related complex subunit 6
756	chr11	69059996	69060016	21	*	6.13601e-08	0.00970245	4.87019e-05	0.00964496	Promoter (<=1kb)	chr11	69059775	69061576	1802	+	71923	uc007jpb.1	241	ENSMUSG00000045176	Borcs6	BLOC-1 related complex subunit 6
757	chr11	69089050	69089054	5	*	4.37715e-06	4.83107e-05	0.00391354	-0.00386523	Promoter (<=1kb)	chr11	69088528	69092381	3854	+	22318	uc007jpe.1	526	ENSMUSG00000020894	Vamp2	vesicle-associated membrane protein 2
758	chr11	69089130	69089142	13	*	1.56795e-06	0.341588	0.00586723	0.335721	Promoter (<=1kb)	chr11	69088528	69092381	3854	+	22318	uc007jpe.1	614	ENSMUSG00000020894	Vamp2	vesicle-associated membrane protein 2
759	chr11	69095026	69095070	45	*	1.37654e-06	6.29629e-05	0.00502706	-0.0049641	Promoter (<=1kb)	chr11	69095254	69106458	11205	+	18626	uc007jpf.1	-228	ENSMUSG00000020893	Per1	period circadian clock 1
760	chr11	69122426	69122452	27	*	0.00133212	2.97422e-05	0.000487959	-0.000458217	Promoter (1-2kb)	chr11	69120453	69123259	2807	+	84653	uc007jpi.1	1999	ENSMUSG00000023781	Hes7	hairy and enhancer of split 7 (Drosophila)
761	chr11	69122636	69122753	118	*	5.14321e-07	0.00311004	3.65489e-05	0.00307349	Promoter (2-3kb)	chr11	69120453	69123259	2807	+	84653	uc007jpi.1	2300	ENSMUSG00000023781	Hes7	hairy and enhancer of split 7 (Drosophila)
762	chr11	69123228	69123228	1	*	0.000782725	0.305566	0.0169408	0.288625	Promoter (2-3kb)	chr11	69120453	69123259	2807	+	84653	uc007jpi.1	2775	ENSMUSG00000023781	Hes7	hairy and enhancer of split 7 (Drosophila)
763	chr11	69409149	69409219	71	*	0.000114135	0.00532459	0.000153967	0.00516675	Promoter (2-3kb)	chr11	69398518	69406173	7656	-	216850	uc007jqd.1	-2976	ENSMUSG00000018476	Kdm6b	KDM1 lysine (K)-specific demethylase 6B
764	chr11	69513619	69513666	48	*	0.000158576	0.882162	0.812736	0.0694265	Intron (uc007jqg.1/327954, intron 74 of 85)	chr11	69420809	69549108	128300	-	327954	uc007jqg.1	35442	ENSMUSG00000005237	Dnah2	dynein, axonemal, heavy chain 2
765	chr11	69579033	69579071	39	*	1.69345e-05	3.76345e-05	0.00246712	-0.0024295	Promoter (<=1kb)	chr11	69561754	69579324	17571	-	216853	uc007jqj.1	253	ENSMUSG00000041346	Wrap53	WD repeat containing, antisense to Trp53
766	chr11	69581456	69581488	33	*	1.45836e-11	0.00271115	3.23288e-05	0.00267882	Promoter (1-2kb)	chr11	69580359	69589821	9463	+	22059	uc007jql.2	1129	ENSMUSG00000059552	Trp53	transformation related protein 53
767	chr11	69632930	69632930	1	*	2.96954e-06	0.00181951	0.241487	-0.239667	Promoter (<=1kb)	chr11	69632971	69653297	20327	+	23879	uc007jqt.1	-41	ENSMUSG00000018765	Fxr2	fragile X mental retardation, autosomal homolog 2
768	chr11	69633113	69633122	10	*	0.000124483	3.10115e-05	0.000809162	-0.00077815	Promoter (<=1kb)	chr11	69632971	69653297	20327	+	23879	uc007jqt.1	151	ENSMUSG00000018765	Fxr2	fragile X mental retardation, autosomal homolog 2
769	chr11	69633125	69633136	12	*	1.64099e-11	0.383837	0.000944593	0.382892	Promoter (<=1kb)	chr11	69632971	69653297	20327	+	23879	uc007jqt.1	165	ENSMUSG00000018765	Fxr2	fragile X mental retardation, autosomal homolog 2
770	chr11	69633141	69633141	1	*	8.2322e-05	3.89112e-05	0.00157986	-0.00154095	Promoter (<=1kb)	chr11	69632971	69653297	20327	+	23879	uc007jqt.1	170	ENSMUSG00000018765	Fxr2	fragile X mental retardation, autosomal homolog 2
771	chr11	69671623	69671647	25	*	3.91456e-07	0.380896	0.00583981	0.375056	Promoter (<=1kb)	chr11	69666936	69672423	5488	-	13681	uc007jqz.2	776	ENSMUSG00000059796	Eif4a1	eukaryotic translation initiation factor 4A1
772	chr11	69671737	69671738	2	*	0.00516766	0.00735113	0.142426	-0.135075	Promoter (<=1kb)	chr11	69666936	69672423	5488	-	13681	uc007jqz.2	685	ENSMUSG00000059796	Eif4a1	eukaryotic translation initiation factor 4A1
773	chr11	69671861	69671863	3	*	0.00109168	0.0151231	0.308999	-0.293876	Promoter (<=1kb)	chr11	69666936	69672423	5488	-	13681	uc007jqz.2	560	ENSMUSG00000059796	Eif4a1	eukaryotic translation initiation factor 4A1
774	chr11	69671969	69671979	11	*	9.13515e-06	4.83863e-05	0.00495882	-0.00491043	Promoter (<=1kb)	chr11	69666936	69672423	5488	-	13681	uc007jqz.2	444	ENSMUSG00000059796	Eif4a1	eukaryotic translation initiation factor 4A1
775	chr11	69881049	69881126	78	*	0.000150023	0.000935857	2.99231e-05	0.000905934	Promoter (<=1kb)	chr11	69878264	69880985	2722	-	216858	uc007jsd.2	-64	ENSMUSG00000046731	Kctd11	potassium channel tetramerisation domain containing 11
776	chr11	69980920	69980942	23	*	3.24025e-05	0.285289	0.00599448	0.279294	Promoter (<=1kb)	chr11	69981168	69990600	9433	+	67181	uc007jtf.1	-248	ENSMUSG00000018559	Ctdnep1	CTD nuclear envelope phosphatase 1
777	chr11	69996634	69996637	4	*	0.00672572	0.00638987	0.00037999	0.00600988	Promoter (<=1kb)	chr11	69996941	70000011	3071	+	78246	uc007jtj.3	-307	ENSMUSG00000018572	Phf23	PHD finger protein 23
778	chr11	69996935	69997004	70	*	0.000114443	2.98686e-05	0.000690558	-0.00066069	Promoter (<=1kb)	chr11	69996941	70000011	3071	+	78246	uc007jtj.3	0	ENSMUSG00000018572	Phf23	PHD finger protein 23
779	chr11	69997451	69997499	49	*	1.25914e-07	0.378636	0.00481517	0.373821	Promoter (<=1kb)	chr11	69997462	70000011	2550	+	78246	uc007jtk.2	0	ENSMUSG00000018572	Phf23	PHD finger protein 23
780	chr11	70021565	70021598	34	*	1.17603e-05	3.36201e-05	0.00204924	-0.00201562	Promoter (2-3kb)	chr11	70018605	70045531	26927	+	13385	uc007jtp.2	2993	ENSMUSG00000020886	Dlg4	discs, large homolog 4 (Drosophila)
781	chr11	70229883	70229926	44	*	0.000729017	0.000108816	0.00291316	-0.00280372	Promoter (<=1kb)	chr11	70224127	70229798	5672	-	12029	uc007juc.2	-85	ENSMUSG00000000317	Bcl6b	B cell CLL/lymphoma 6, member B
782	chr11	70452212	70452296	85	*	3.08934e-09	0.379042	0.00280111	0.376241	Promoter (<=1kb)	chr11	70451931	70453726	1796	+	66172	uc007juv.1	365	ENSMUSG00000018923	Med11	mediator complex subunit 11
783	chr11	70647007	70647036	30	*	2.25456e-05	3.77476e-05	0.00191276	-0.00187502	Promoter (<=1kb)	chr11	70644027	70647039	3013	-	67863	uc007jvr.2	3	ENSMUSG00000014606	Slc25a11	solute carrier family 25 (mitochondrial carrier oxoglutarate carrier), member 11
784	chr11	70647125	70647127	3	*	4.8353e-10	0.381767	0.00168246	0.380085	Promoter (<=1kb)	chr11	70644027	70647039	3013	-	67863	uc007jvr.2	-86	ENSMUSG00000014606	Slc25a11	solute carrier family 25 (mitochondrial carrier oxoglutarate carrier), member 11
785	chr11	70982899	70982965	67	*	3.82145e-07	0.00165144	3.16616e-05	0.00161978	Promoter (<=1kb)	chr11	70977846	70983026	5181	-	12261	uc007jxf.1	61	ENSMUSG00000018446	C1qbp	complement component 1, q subcomponent binding protein
786	chr11	71003763	71003812	50	*	1.54809e-06	6.82542e-05	0.00629826	-0.00623	Promoter (<=1kb)	chr11	70984091	71004432	20342	-	216877	uc007jxg.1	620	ENSMUSG00000040620	Dhx33	DEAH (Asp-Glu-Ala-His) box polypeptide 33
787	chr11	72215006	72215075	70	*	7.92646e-05	0.000983515	3.76621e-05	0.000945853	Promoter (<=1kb)	chr11	72215138	72218450	3313	+	75304	uc011xyh.1	-132	#N/A	4930563E22Rik	RIKEN cDNA 4930563E22 gene
788	chr11	72489669	72489714	46	*	3.95303e-11	0.383347	0.00139747	0.381946	Promoter (<=1kb)	chr11	72451638	72489920	38283	-	216892	uc007jyz.3	206	ENSMUSG00000040447	Spns2	spinster homolog 2
789	chr11	72489861	72489910	50	*	4.75921e-08	9.6146e-05	0.0201334	-0.0200521	Promoter (<=1kb)	chr11	72451638	72489920	38283	-	216892	uc007jyz.3	10	ENSMUSG00000040447	Spns2	spinster homolog 2
790	chr11	72608238	72608311	74	*	2.35706e-07	0.00252277	3.36403e-05	0.00248938	Promoter (1-2kb)	chr11	72607261	72680140	72880	+	67128	uc007jzc.1	1050	ENSMUSG00000020794	Ube2g1	ubiquitin-conjugating enzyme E2G 1
791	chr11	72690057	72690092	36	*	3.68913e-07	0.376345	0.00477779	0.371568	Promoter (<=1kb)	chr11	72690002	72725180	35179	+	11736	uc007jzg.1	90	ENSMUSG00000020790	Ankfy1	ankyrin repeat and FYVE domain containing 1
792	chr11	72690144	72690190	47	*	9.31707e-07	5.88912e-05	0.0165955	-0.0165366	Promoter (<=1kb)	chr11	72690002	72725180	35179	+	11736	uc007jzg.1	188	ENSMUSG00000020790	Ankfy1	ankyrin repeat and FYVE domain containing 1
793	chr11	73680779	73680841	63	*	0.000324825	0.865976	0.98687	-0.120893	Distal Intergenic	chr11	73688778	73713808	25031	+	76390	uc007kaz.2	-7999	ENSMUSG00000060630	Zfp735	zinc finger protein 735
794	chr11	74638644	74638681	38	*	2.86476e-48	0.0074159	3.20333e-05	0.00738438	3' UTR	chr11	74649495	74670847	21353	+	74148	uc007kca.1	-10851	ENSMUSG00000020741	Cluh	clustered mitochondria (cluA/CLU1) homolog
795	chr11	74770963	74771017	55	*	0.000257244	0.318896	0.0107578	0.307008	Promoter (<=1kb)	chr11	74770863	74818692	47830	+	67493	uc007kch.1	154	ENSMUSG00000010554	Mettl16	methyltransferase like 16
796	chr11	74830518	74830574	57	*	9.11012e-09	0.371627	0.00254905	0.369078	Promoter (<=1kb)	chr11	74830924	74845725	14802	+	17428	uc011xzb.1	-406	ENSMUSG00000000282	Mnt	max binding protein
797	chr11	74831503	74831518	16	*	0.00126445	0.0165947	0.0340833	-0.0174887	Promoter (<=1kb)	chr11	74830924	74845725	14802	+	17428	uc011xzb.1	594	ENSMUSG00000000282	Mnt	max binding protein
798	chr11	75454214	75454261	48	*	0.000210934	0.00294523	8.22556e-05	0.00286077	Promoter (<=1kb)	chr11	75440943	75454717	13775	-	192652	uc007kdt.2	456	ENSMUSG00000045374	Wdr81	WD repeat domain 81
799	chr11	75454725	75454755	31	*	4.53099e-05	0.000807865	3.32868e-05	0.000774578	Promoter (<=1kb)	chr11	75440943	75454717	13775	-	192652	uc007kdt.2	-8	ENSMUSG00000045374	Wdr81	WD repeat domain 81
800	chr11	75462485	75462560	76	*	0.000109448	9.48614e-05	0.0045255	-0.00443064	Promoter (1-2kb)	chr11	75461539	75466690	5152	+	100042498	uc007kdv.1	1021	ENSMUSG00000085148	Mir22hg	Mir22 host gene (non-protein coding)
801	chr11	76179794	76179821	28	*	0.000237305	0.125091	0.00249231	0.122598	Promoter (<=1kb)	chr11	76179671	76214827	35157	+	116972	uc007kff.1	150	ENSMUSG00000069808	Fam57a	family with sequence similarity 57, member A
802	chr11	76202096	76202103	8	*	0.00139068	0.000369265	0.0210153	-0.0206461	Promoter (<=1kb)	chr11	76202056	76208257	6202	+	116972	uc007kfg.2	47	ENSMUSG00000069808	Fam57a	family with sequence similarity 57, member A
803	chr11	76202267	76202324	58	*	5.14922e-05	3.19664e-05	0.000943401	-0.000911434	Promoter (<=1kb)	chr11	76202056	76208257	6202	+	116972	uc007kfg.2	268	ENSMUSG00000069808	Fam57a	family with sequence similarity 57, member A
804	chr11	76243425	76243428	4	*	1.46679e-05	0.266708	0.001623	0.265085	Promoter (<=1kb)	chr11	76210571	76243699	33129	-	276919	uc007kfj.2	271	ENSMUSG00000049396	Gemin4	gem (nuclear organelle) associated protein 4
805	chr11	76243455	76243456	2	*	0.000175339	2.9674e-05	0.000557015	-0.000527341	Promoter (<=1kb)	chr11	76210571	76243699	33129	-	276919	uc007kfj.2	243	ENSMUSG00000049396	Gemin4	gem (nuclear organelle) associated protein 4
806	chr11	76243821	76243928	108	*	3.57215e-07	0.373356	0.00610308	0.367253	Promoter (<=1kb)	chr11	76243736	76244884	1149	+	67390	uc007kfm.2	192	ENSMUSG00000038046	Rnmtl1	RNA methyltransferase like 1
807	chr11	76622835	76622835	1	*	0.000231377	3.25419e-05	0.000610816	-0.000578274	Distal Intergenic	chr11	76416732	76577739	161008	-	109934	uc007kfu.2	-45096	ENSMUSG00000017631	Abr	active BCR-related gene
808	chr11	76622864	76622902	39	*	2.36771e-11	0.383291	0.00129705	0.382106	Distal Intergenic	chr11	76416732	76577739	161008	-	109934	uc007kfu.2	-45125	ENSMUSG00000017631	Abr	active BCR-related gene
809	chr11	76623308	76623314	7	*	5.72398e-07	0.00357627	3.42681e-05	0.003542	Distal Intergenic	chr11	76416732	76577739	161008	-	109934	uc007kfu.2	-45569	ENSMUSG00000017631	Abr	active BCR-related gene
810	chr11	76623433	76623525	93	*	5.55212e-05	3.15455e-05	0.00112052	-0.00108884	Distal Intergenic	chr11	76416732	76577739	161008	-	109934	uc007kfu.2	-45694	ENSMUSG00000017631	Abr	active BCR-related gene
811	chr11	76623604	76623604	1	*	9.95414e-08	0.00566859	3.00004e-05	0.00563859	Distal Intergenic	chr11	76416732	76577739	161008	-	109934	uc007kfu.2	-45865	ENSMUSG00000017631	Abr	active BCR-related gene
812	chr11	76846918	76847016	99	*	2.20557e-06	7.69452e-05	0.00450191	-0.00442581	Promoter (<=1kb)	chr11	76777208	76847008	69801	-	12874	uc007kga.1	0	ENSMUSG00000020841	Cpd	carboxypeptidase D
813	chr11	76945576	76945656	81	*	5.57807e-05	3.22825e-05	0.00085868	-0.000826397	Promoter (<=1kb)	chr11	76945656	76987389	41734	+	104184	uc007kge.2	0	ENSMUSG00000020840	Blmh	bleomycin hydrolase
814	chr11	77491711	77491754	44	*	4.02001e-05	0.000946233	3.40129e-05	0.000912411	Promoter (1-2kb)	chr11	77493412	77507774	14363	+	216963	uc007kgy.1	-1701	ENSMUSG00000011877	Git1	G protein-coupled receptor kinase-interactor 1
815	chr11	77493601	77493669	69	*	5.56349e-05	0.00754203	7.97106e-05	0.00747308	Promoter (<=1kb)	chr11	77493412	77507774	14363	+	216963	uc007kgy.1	257	ENSMUSG00000011877	Git1	G protein-coupled receptor kinase-interactor 1
816	chr11	77607217	77607264	48	*	0.000163345	0.00235604	7.12702e-05	0.00228477	Promoter (<=1kb)	chr11	77529162	77607815	78654	-	216965	uc007khc.1	551	ENSMUSG00000017291	Taok1	TAO kinase 1
817	chr11	77687207	77687286	80	*	1.26469e-09	0.383155	0.00184484	0.381202	Promoter (1-2kb)	chr11	77686139	77717966	31828	+	68564	uc007khd.2	1147	ENSMUSG00000037857	Nufip2	nuclear fragile X mental retardation protein interacting protein 2
818	chr11	77687497	77687574	78	*	3.46901e-06	3.24162e-05	0.00309864	-0.00306635	Promoter (1-2kb)	chr11	77686139	77717966	31828	+	68564	uc007khd.2	1435	ENSMUSG00000037857	Nufip2	nuclear fragile X mental retardation protein interacting protein 2
819	chr11	77777988	77777988	1	*	0.000777168	0.973834	0.950157	0.0236766	Promoter (<=1kb)	chr11	77777235	77865988	88754	+	360013	uc007khg.2	753	ENSMUSG00000000631	Myo18a	myosin XVIIIA
820	chr11	77974385	77974394	10	*	0.000376538	0.0931633	0.0540674	0.0390959	Intron (uc007kho.2/20370, intron 9 of 15)	chr11	77982816	78009923	27108	+	268448	uc007khr.2	-8431	ENSMUSG00000037791	Phf12	PHD finger protein 12
821	chr11	78115570	78115679	110	*	0.000152014	8.24488e-05	0.0043641	-0.00428659	Promoter (<=1kb)	chr11	78115626	78157339	41714	+	216971	uc007kie.2	0	ENSMUSG00000037750	Fam222b	family with sequence similarity 222, member B
822	chr11	78115770	78115770	1	*	0.0041696	0.0427945	0.00534089	0.0374536	Promoter (<=1kb)	chr11	78115626	78157339	41714	+	216971	uc007kie.2	144	ENSMUSG00000037750	Fam222b	family with sequence similarity 222, member B
823	chr11	78165398	78165501	104	*	1.51422e-05	3.951e-05	0.001946	-0.00190539	Promoter (<=1kb)	chr11	78158423	78165550	7128	-	22032	uc007kif.2	49	ENSMUSG00000017386	Traf4	TNF receptor associated factor 4
824	chr11	78165515	78165524	10	*	8.03379e-05	0.00220531	6.51059e-05	0.0021402	Promoter (<=1kb)	chr11	78158423	78165550	7128	-	22032	uc007kif.2	26	ENSMUSG00000017386	Traf4	TNF receptor associated factor 4
825	chr11	78176475	78176475	1	*	0.00210704	0.0374778	0.00136249	0.0361153	Promoter (<=1kb)	chr11	78166106	78176666	10561	-	140859	uc007kih.2	191	ENSMUSG00000017405	Nek8	NIMA (never in mitosis gene a)-related expressed kinase 8
826	chr11	78343558	78343597	40	*	1.6278e-05	2.99036e-05	0.00078326	-0.000753357	Promoter (<=1kb)	chr11	78343522	78349156	5635	+	22248	uc007kjb.1	75	ENSMUSG00000002058	Unc119	unc-119 homolog (C. elegans)
827	chr11	78697067	78697171	105	*	0.000397672	0.000993109	5.1927e-05	0.000954582	Promoter (<=1kb)	chr11	78567168	78697425	130258	-	18099	uc007kjw.1	254	ENSMUSG00000017376	Nlk	nemo like kinase
828	chr11	78697462	78697572	111	*	1.54131e-06	0.00202818	3.84836e-05	0.00198897	Promoter (<=1kb)	chr11	78567168	78697425	130258	-	18099	uc007kjw.1	-37	ENSMUSG00000017376	Nlk	nemo like kinase
829	chr11	78697618	78697618	1	*	0.00244742	0.00698857	0.181241	-0.174252	Promoter (<=1kb)	chr11	78567168	78697425	130258	-	18099	uc007kjw.1	-193	ENSMUSG00000017376	Nlk	nemo like kinase
830	chr11	78751624	78751683	60	*	7.36757e-06	0.419478	0.0077162	0.411737	Promoter (<=1kb)	chr11	78750506	78751729	1224	-	69109	uc007kjz.1	46	ENSMUSG00000049489	Fam58b	family with sequence similarity 58, member B
831	chr11	79146478	79146520	43	*	8.65515e-09	0.383458	0.00259157	0.380867	Promoter (<=1kb)	chr11	79014801	79146354	131554	-	16706	uc033fyo.1	-124	ENSMUSG00000018334	Ksr1	kinase suppressor of ras 1
832	chr11	79254827	79254859	33	*	0.000200749	0.00033321	0.0180374	-0.0177042	Promoter (<=1kb)	chr11	79239382	79254695	15314	-	78889	uc007kki.1	-132	ENSMUSG00000017677	Wsb1	WD repeat and SOCS box-containing 1
833	chr11	79339404	79339409	6	*	1.23367e-05	0.00177445	4.02842e-05	0.00173417	Promoter (<=1kb)	chr11	79339892	79430788	90897	+	18015	uc007kkk.1	-488	ENSMUSG00000020716	Nf1	neurofibromatosis 1
834	chr11	79339570	79339570	1	*	0.00211063	3.83634e-05	0.000442739	-0.000404375	Promoter (<=1kb)	chr11	79339892	79430788	90897	+	18015	uc007kkk.1	-322	ENSMUSG00000020716	Nf1	neurofibromatosis 1
835	chr11	79339636	79339680	45	*	2.33321e-13	0.384209	0.000563883	0.383698	Promoter (<=1kb)	chr11	79339892	79430788	90897	+	18015	uc007kkk.1	-256	ENSMUSG00000020716	Nf1	neurofibromatosis 1
836	chr11	79340016	79340064	49	*	1.00176e-05	0.0014162	3.34737e-05	0.00138273	Promoter (<=1kb)	chr11	79339892	79430788	90897	+	18015	uc007kkk.1	172	ENSMUSG00000020716	Nf1	neurofibromatosis 1
837	chr11	79704808	79704809	2	*	2.48629e-07	0.381183	0.00577425	0.375408	Distal Intergenic	chr11	79711969	79712034	66	+	387188	uc011yan.1	-7161	ENSMUSG00000065395	Mir193a	microRNA 193a
838	chr11	79704891	79704891	1	*	4.73377e-08	3.81411e-05	0.00557812	-0.00553998	Distal Intergenic	chr11	79711969	79712034	66	+	387188	uc011yan.1	-7078	ENSMUSG00000065395	Mir193a	microRNA 193a
839	chr11	80089369	80089561	193	*	4.90561e-05	0.000718534	3.17497e-05	0.000686785	Promoter (<=1kb)	chr11	80089400	80102994	13595	+	237877	uc007klf.2	0	ENSMUSG00000017550	Atad5	ATPase family, AAA domain containing 5
840	chr11	80089598	80089598	1	*	2.57743e-05	8.50329e-05	0.00862876	-0.00854372	Promoter (<=1kb)	chr11	80089400	80102994	13595	+	237877	uc007klf.2	198	ENSMUSG00000017550	Atad5	ATPase family, AAA domain containing 5
841	chr11	80142024	80142024	1	*	6.7453e-05	0.000950535	3.6223e-05	0.000914312	Promoter (<=1kb)	chr11	80136678	80142124	5447	-	68550	uc007kli.1	100	ENSMUSG00000046909	Tefm	transcription elongation factor, mitochondrial
842	chr11	80142059	80142223	165	*	5.87758e-06	3.38128e-05	0.00138919	-0.00134831	Promoter (<=1kb)	chr11	80136678	80142124	5447	-	68550	uc007kli.1	0	ENSMUSG00000046909	Tefm	transcription elongation factor, mitochondrial
843	chr11	80209020	80209142	123	*	3.45257e-05	0.000443771	2.98892e-05	0.000414025	Promoter (<=1kb)	chr11	80209055	80267907	58853	+	59040	uc007klo.2	0	ENSMUSG00000017686	Rhot1	ras homolog gene family, member T1
844	chr11	80477185	80477188	4	*	1.05637e-06	0.00179143	3.64198e-05	0.00175501	Promoter (<=1kb)	chr11	80477046	80481179	4134	+	12569	uc011yat.1	142	ENSMUSG00000048895	Cdk5r1	cyclin-dependent kinase 5, regulatory subunit 1 (p35)
845	chr11	80477267	80477273	7	*	8.88233e-06	7.55848e-05	0.0049413	-0.00486572	Promoter (<=1kb)	chr11	80477046	80481179	4134	+	12569	uc011yat.1	227	ENSMUSG00000048895	Cdk5r1	cyclin-dependent kinase 5, regulatory subunit 1 (p35)
846	chr11	80477303	80477308	6	*	1.689e-07	0.372329	0.00489373	0.367435	Promoter (<=1kb)	chr11	80477046	80481179	4134	+	12569	uc011yat.1	262	ENSMUSG00000048895	Cdk5r1	cyclin-dependent kinase 5, regulatory subunit 1 (p35)
847	chr11	80477315	80477383	69	*	0.000703975	0.00187328	0.131369	-0.128267	Promoter (<=1kb)	chr11	80477046	80481179	4134	+	12569	uc011yat.1	337	ENSMUSG00000048895	Cdk5r1	cyclin-dependent kinase 5, regulatory subunit 1 (p35)
848	chr11	80863037	80863037	1	*	0.00012244	0.870774	0.922452	-0.0516779	5' UTR	chr11	80858389	80867814	9426	+	75622	uc007kmk.1	4648	ENSMUSG00000053184	Spaca3	sperm acrosome associated 3
849	chr11	82764146	82764175	30	*	8.3648e-06	0.0021036	5.16956e-05	0.0020519	Promoter (<=1kb)	chr11	82719248	82764321	45074	-	12467	uc007kmx.3	146	ENSMUSG00000020698	Cct6b	chaperonin containing Tcp1, subunit 6b (zeta)
850	chr11	82764610	82764688	79	*	0.000541216	0.0318318	0.0014435	0.0301533	Promoter (<=1kb)	chr11	82764345	82767622	3278	+	66983	uc007kmy.1	343	ENSMUSG00000046010	Zfp830	zinc finger protein 830
851	chr11	82870394	82870471	78	*	1.03963e-09	0.378338	0.00227802	0.37606	Promoter (<=1kb)	chr11	82803819	82870744	66926	-	67338	uc007kni.2	273	ENSMUSG00000020696	Rffl	ring finger and FYVE like domain containing protein
852	chr11	82930157	82930191	35	*	5.15313e-11	0.162678	0.495191	-0.332513	Intron (uc007knv.2/217012, intron 13 of 19)	chr11	82911680	82943406	31727	+	217012	uc007knw.1	18511	ENSMUSG00000018845	Unc45b	unc-45 homolog B (C. elegans)
853	chr11	83270997	83271080	84	*	0.000189813	0.00027994	0.0121867	-0.0118774	Distal Intergenic	chr11	83275112	83286726	11615	-	237890	uc011ybg.1	15646	ENSMUSG00000082101	Slfn14	schlafen 14
854	chr11	83302524	83302541	18	*	0.000820398	0.00253324	0.000108584	0.00242466	Promoter (<=1kb)	chr11	83302697	83344580	41884	+	71770	uc007kor.1	-173	ENSMUSG00000035152	Ap2b1	adaptor-related protein complex 2, beta 1 subunit
855	chr11	83303034	83303109	76	*	1.04905e-11	0.382414	0.000897333	0.381517	Promoter (<=1kb)	chr11	83302697	83344580	41884	+	71770	uc007kor.1	412	ENSMUSG00000035152	Ap2b1	adaptor-related protein complex 2, beta 1 subunit
856	chr11	83409476	83409515	40	*	0.000289586	0.00209917	7.61983e-05	0.00202297	Promoter (<=1kb)	chr11	83409317	83421038	11722	+	276952	uc007kov.1	198	ENSMUSG00000020684	Rasl10b	RAS-like, family 10, member B
857	chr11	83473343	83473419	77	*	1.91757e-07	3.53197e-05	0.00439464	-0.00436109	Promoter (<=1kb)	chr11	83473108	83489213	16106	+	70439	uc007kpe.1	311	ENSMUSG00000020680	Taf15	TAF15 RNA polymerase II, TATA box binding protein (TBP)-associated factor
858	chr11	83753767	83753816	50	*	5.36716e-08	0.00208196	3.6126e-05	0.00204584	Promoter (<=1kb)	chr11	83753712	83783754	30043	+	217026	uc007kpv.1	104	ENSMUSG00000000976	Heatr6	HEAT repeat containing 6
859	chr11	83964270	83964490	221	*	0.000325394	0.000998115	4.77311e-05	0.000950383	Promoter (<=1kb)	chr11	83964431	84044576	80146	+	217030	uc007kqa.3	0	ENSMUSG00000034940	Synrg	synergin, gamma
860	chr11	84818956	84819024	69	*	5.47966e-12	0.00705693	5.57952e-05	0.00699739	Promoter (<=1kb)	chr11	84813061	84819515	6455	-	217038	uc007kqr.1	491	ENSMUSG00000018405	Mrm1	mitochondrial rRNA methyltransferase 1 homolog (S. cerevisiae)
861	chr11	84869787	84869888	102	*	6.49981e-06	0.344755	0.00623384	0.338353	Promoter (<=1kb)	chr11	84870005	84871631	1627	+	102635561	uc033fyy.2	-218	#N/A	Ggnbp2os	gametogenetin binding protein 2, opposite strand
862	chr11	84870691	84871034	344	*	4.61783e-05	0.0023636	5.75911e-05	0.00229944	Promoter (<=1kb)	chr11	84870923	84871631	709	+	102635561	uc056yno.1	0	#N/A	Ggnbp2os	gametogenetin binding protein 2, opposite strand
863	chr11	84879858	84880001	144	*	8.93196e-05	3.11319e-05	0.000787255	-0.000756189	Promoter (<=1kb)	chr11	84876313	84880178	3866	-	70325	uc011ybm.1	177	ENSMUSG00000045140	Pigw	phosphatidylinositol glycan anchor biosynthesis, class W
864	chr11	84880021	84880118	98	*	1.86359e-05	0.001323	4.04711e-05	0.00128253	Promoter (<=1kb)	chr11	84876313	84880178	3866	-	70325	uc011ybm.1	60	ENSMUSG00000045140	Pigw	phosphatidylinositol glycan anchor biosynthesis, class W
865	chr11	84880380	84880397	18	*	0.000301433	3.05612e-05	0.000643051	-0.00061249	Promoter (<=1kb)	chr11	84876313	84880285	3973	-	70325	uc007kqz.1	-95	ENSMUSG00000045140	Pigw	phosphatidylinositol glycan anchor biosynthesis, class W
866	chr11	85140069	85140348	280	*	1.46324e-05	0.0018928	4.3021e-05	0.00185233	Promoter (<=1kb)	chr11	84984488	85139955	155468	-	237898	uc007krh.1	-114	ENSMUSG00000000804	Usp32	ubiquitin specific peptidase 32
867	chr11	85832961	85832976	16	*	7.29318e-07	0.00359114	5.60342e-05	0.00353511	Promoter (<=1kb)	chr11	85832615	85841948	9334	+	21385	uc007ksb.1	361	ENSMUSG00000000093	Tbx2	T-box 2
868	chr11	86484885	86484903	19	*	4.04597e-06	0.00232331	4.58294e-05	0.00227521	Promoter (<=1kb)	chr11	86484670	86499007	14338	+	76892	uc007ksm.1	233	ENSMUSG00000020521	Rnft1	ring finger protein, transmembrane 1
869	chr11	86544683	86544777	95	*	5.39029e-77	0.00870363	3.24501e-05	0.00843299	Promoter (<=1kb)	chr11	86499011	86544807	45797	-	72508	uc007ksn.2	30	ENSMUSG00000020516	Rps6kb1	ribosomal protein S6 kinase, polypeptide 1
870	chr11	86807447	86807543	97	*	1.56231e-05	0.00209125	5.24918e-05	0.00203991	Promoter (<=1kb)	chr11	86768849	86807660	38812	-	67487	uc007ktc.1	117	ENSMUSG00000018425	Dhx40	DEAH (Asp-Glu-Ala-His) box polypeptide 40
871	chr11	87086710	87086732	23	*	3.38007e-05	0.0031207	6.08464e-05	0.00305985	Promoter (<=1kb)	chr11	87077732	87086777	9046	-	74133	uc007ktg.1	45	ENSMUSG00000020495	Smg8	smg-8 homolog, nonsense mediated mRNA decay factor (C. elegans)
872	chr11	87591599	87591667	69	*	3.65068e-08	0.000116144	0.0147739	-0.0146578	Promoter (<=1kb)	chr11	87592217	87616296	24080	+	170749	uc007ktz.1	-618	ENSMUSG00000018401	Mtmr4	myotubularin related protein 4
873	chr11	88047191	88047311	121	*	1.6793e-08	0.373075	0.00255874	0.370751	Promoter (<=1kb)	chr11	88047373	88053757	6385	+	110809	uc007kvc.2	-182	ENSMUSG00000018379	Srsf1	serine/arginine-rich splicing factor 1
874	chr11	88139332	88139332	1	*	0.000812782	0.751631	0.610067	0.141564	Intron (uc007kvg.2/103841, intron 1 of 5)	chr11	88162261	88194140	31880	+	103841	uc011ycf.1	-22929	ENSMUSG00000018378	Cuedc1	CUE domain containing 1
875	chr11	88718692	88718707	16	*	1.49622e-08	0.377686	0.00280555	0.374881	Promoter (<=1kb)	chr11	88718643	88722600	3958	+	193280	uc007kvs.2	64	#N/A	C030037D09Rik	RIKEN cDNA C030037D09 gene
876	chr11	88718738	88718802	65	*	0.000126592	2.9645e-05	0.000597844	-0.000568199	Promoter (<=1kb)	chr11	88718643	88722600	3958	+	193280	uc007kvs.2	159	#N/A	C030037D09Rik	RIKEN cDNA C030037D09 gene
877	chr11	89302513	89302551	39	*	0.000285537	0.00861621	0.000200611	0.00841058	Promoter (<=1kb)	chr11	89300638	89302559	1922	-	18121	uc007kwh.2	8	ENSMUSG00000048616	Nog	noggin
878	chr11	94473799	94473930	132	*	2.0679e-07	3.64282e-05	0.00378326	-0.00374683	Promoter (<=1kb)	chr11	94408391	94474198	65808	-	12291	uc007kyr.2	268	ENSMUSG00000020866	Cacna1g	calcium channel, voltage-dependent, T type, alpha 1G subunit
879	chr11	94474215	94474367	153	*	3.02589e-05	0.00135433	3.71097e-05	0.00131544	Promoter (<=1kb)	chr11	94408391	94474198	65808	-	12291	uc007kyr.2	-17	ENSMUSG00000020866	Cacna1g	calcium channel, voltage-dependent, T type, alpha 1G subunit
880	chr11	94548859	94548872	14	*	2.49421e-07	0.380491	0.00444554	0.376045	Promoter (<=1kb)	chr11	94539798	94549207	9410	-	237926	uc007kza.2	335	ENSMUSG00000039096	Rsad1	radical S-adenosyl methionine domain containing 1
881	chr11	94548874	94548874	1	*	3.02417e-06	3.72135e-05	0.00467347	-0.00463626	Promoter (<=1kb)	chr11	94539798	94549207	9410	-	237926	uc007kza.2	333	ENSMUSG00000039096	Rsad1	radical S-adenosyl methionine domain containing 1
882	chr11	94548908	94548908	1	*	2.43289e-08	0.383606	0.00312594	0.38048	Promoter (<=1kb)	chr11	94539798	94549207	9410	-	237926	uc007kza.2	299	ENSMUSG00000039096	Rsad1	radical S-adenosyl methionine domain containing 1
883	chr11	94549182	94549251	70	*	4.61567e-09	0.376966	0.00234731	0.374619	Promoter (<=1kb)	chr11	94539798	94549207	9410	-	237926	uc007kza.2	0	ENSMUSG00000039096	Rsad1	radical S-adenosyl methionine domain containing 1
884	chr11	94991061	94991069	9	*	0.00273864	0.0017156	0.127087	-0.125371	Promoter (<=1kb)	chr11	94991212	95006898	15687	+	217124	uc007kzr.2	-151	ENSMUSG00000038976	Ppp1r9b	protein phosphatase 1, regulatory subunit 9B
885	chr11	94991136	94991214	79	*	3.64412e-05	0.00403174	7.16763e-05	0.00396006	Promoter (<=1kb)	chr11	94991212	95006898	15687	+	217124	uc007kzr.2	0	ENSMUSG00000038976	Ppp1r9b	protein phosphatase 1, regulatory subunit 9B
886	chr11	94991600	94991664	65	*	2.68693e-05	0.00221058	4.90952e-05	0.00216158	Promoter (<=1kb)	chr11	94991212	95006898	15687	+	217124	uc007kzr.2	452	ENSMUSG00000038976	Ppp1r9b	protein phosphatase 1, regulatory subunit 9B
887	chr11	95258889	95258929	41	*	7.37395e-06	0.00229091	3.80055e-05	0.00225291	Promoter (2-3kb)	chr11	95261529	95269261	7733	+	93670	uc007lac.1	-2640	ENSMUSG00000020872	Tac4	tachykinin 4
888	chr11	95309669	95309692	24	*	1.99401e-12	0.384884	0.000745819	0.384139	Promoter (<=1kb)	chr11	95271853	95310246	38394	-	217127	uc007lad.2	554	ENSMUSG00000038909	Kat7	K(lysine) acetyltransferase 7
889	chr11	95309710	95309734	25	*	3.42444e-07	3.06313e-05	0.00139957	-0.00136894	Promoter (<=1kb)	chr11	95271853	95310246	38394	-	217127	uc007lad.2	512	ENSMUSG00000038909	Kat7	K(lysine) acetyltransferase 7
890	chr11	95514572	95514632	61	*	1.54286e-16	0.00330211	3.37078e-05	0.00326883	Promoter (<=1kb)	chr11	95509846	95514565	4720	-	104079	uc007lal.1	-7	ENSMUSG00000046719	Nxph3	neurexophilin 3
891	chr11	96284529	96284618	90	*	1.26261e-05	0.00232219	4.17278e-05	0.00227868	Promoter (2-3kb)	chr11	96286646	96290163	3518	+	15415	uc007lbr.1	-2117	ENSMUSG00000038721	Hoxb7	homeobox B7
892	chr11	96829634	96829744	111	*	7.64616e-08	0.00454563	4.96668e-05	0.00449567	Promoter (<=1kb)	chr11	96817414	96829502	12089	-	18023	uc007lcq.2	-132	ENSMUSG00000038615	Nfe2l1	nuclear factor, erythroid derived 2,-like 1
893	chr11	96977539	96977574	36	*	1.15623e-07	0.382307	0.00398468	0.378323	Promoter (<=1kb)	chr11	96953338	96977688	24351	-	78912	uc007ldf.1	114	ENSMUSG00000018678	Sp2	Sp2 transcription factor
894	chr11	96977601	96977621	21	*	2.5286e-06	3.2611e-05	0.00323738	-0.00320477	Promoter (<=1kb)	chr11	96953338	96977688	24351	-	78912	uc007ldf.1	67	ENSMUSG00000018678	Sp2	Sp2 transcription factor
895	chr11	96977855	96977916	62	*	3.82563e-11	0.382979	0.00105773	0.381921	Promoter (<=1kb)	chr11	96953338	96977688	24351	-	78912	uc007ldf.1	-167	ENSMUSG00000018678	Sp2	Sp2 transcription factor
896	chr11	97041571	97041780	210	*	2.87541e-06	0.00260982	3.2998e-05	0.00257179	Promoter (<=1kb)	chr11	97041586	97049213	7628	+	107732	uc007ldm.1	0	ENSMUSG00000001445	Mrpl10	mitochondrial ribosomal protein L10
897	chr11	97086246	97086247	2	*	4.27296e-05	0.914756	0.75639	0.158367	Distal Intergenic	chr11	97066881	97068904	2024	+	71240	uc007ldq.1	19366	ENSMUSG00000038534	Osbpl7	oxysterol binding protein-like 7
898	chr11	97150678	97150709	32	*	2.15947e-05	0.030799	0.000554189	0.0302448	Promoter (<=1kb)	chr11	97136171	97149712	13542	-	73174	uc011ydr.1	-966	ENSMUSG00000038517	Tbkbp1	TBK1 binding protein 1
899	chr11	97186991	97187015	25	*	3.09295e-08	0.374881	0.00386975	0.371011	Promoter (<=1kb)	chr11	97159710	97187892	28183	-	16211	uc007ldu.1	877	ENSMUSG00000001440	Kpnb1	karyopherin (importin) beta 1
900	chr11	97187016	97187016	1	*	7.19209e-06	0.000118746	0.00909732	-0.00897857	Promoter (<=1kb)	chr11	97159710	97187892	28183	-	16211	uc007ldu.1	876	ENSMUSG00000001440	Kpnb1	karyopherin (importin) beta 1
901	chr11	97187023	97187024	2	*	8.58967e-06	0.346996	0.0087359	0.338261	Promoter (<=1kb)	chr11	97159710	97187892	28183	-	16211	uc007ldu.1	868	ENSMUSG00000001440	Kpnb1	karyopherin (importin) beta 1
902	chr11	97187051	97187052	2	*	0.00187688	0.00103945	0.0281768	-0.0271373	Promoter (<=1kb)	chr11	97159710	97187892	28183	-	16211	uc007ldu.1	840	ENSMUSG00000001440	Kpnb1	karyopherin (importin) beta 1
903	chr11	97187081	97187086	6	*	3.32295e-07	0.379209	0.00560822	0.3736	Promoter (<=1kb)	chr11	97159710	97187892	28183	-	16211	uc007ldu.1	806	ENSMUSG00000001440	Kpnb1	karyopherin (importin) beta 1
904	chr11	97187130	97187182	53	*	0.00045158	0.00428147	0.183588	-0.178202	Promoter (<=1kb)	chr11	97159710	97187892	28183	-	16211	uc007ldu.1	710	ENSMUSG00000001440	Kpnb1	karyopherin (importin) beta 1
905	chr11	97575283	97575322	40	*	6.05392e-05	4.0941e-05	0.00192851	-0.00188757	Promoter (<=1kb)	chr11	97509340	97575126	65787	-	56013	uc007lee.1	-157	ENSMUSG00000038453	Srcin1	SRC kinase signaling inhibitor 1
906	chr11	97663092	97663092	1	*	0.000140706	7.50524e-05	0.00342567	-0.00335062	Promoter (<=1kb)	chr11	97663412	97685458	22047	+	246198	uc007lei.1	-320	ENSMUSG00000038437	Mllt6	myeloid/lymphoid or mixed-lineage leukemia (trithorax homolog, Drosophila); translocated to, 6
907	chr11	97663203	97663241	39	*	7.16898e-06	0.00123967	3.09536e-05	0.00120871	Promoter (<=1kb)	chr11	97663412	97685458	22047	+	246198	uc007lei.1	-209	ENSMUSG00000038437	Mllt6	myeloid/lymphoid or mixed-lineage leukemia (trithorax homolog, Drosophila); translocated to, 6
908	chr11	97663864	97663978	115	*	1.94303e-06	0.00592438	8.61988e-05	0.00586791	Promoter (<=1kb)	chr11	97663412	97685458	22047	+	246198	uc007lei.1	566	ENSMUSG00000038437	Mllt6	myeloid/lymphoid or mixed-lineage leukemia (trithorax homolog, Drosophila); translocated to, 6
909	chr11	97781872	97781979	108	*	0.000115267	0.00455249	0.000102185	0.0044503	Promoter (<=1kb)	chr11	97781639	97781766	128	-	100302498	uc011ydw.1	-106	#N/A	Snora21	small nucleolar RNA, H/ACA box 21
910	chr11	97799435	97799553	119	*	4.95534e-06	0.0765144	0.0010422	0.0739442	Promoter (<=1kb)	chr11	97799672	97838764	39093	+	16796	uc007lew.1	-237	ENSMUSG00000038366	Lasp1	LIM and SH3 protein 1
911	chr11	97799750	97799817	68	*	9.48764e-08	0.382161	0.00658817	0.375572	Promoter (<=1kb)	chr11	97799672	97838764	39093	+	16796	uc007lew.1	145	ENSMUSG00000038366	Lasp1	LIM and SH3 protein 1
912	chr11	97884227	97884318	92	*	0.000155596	0.00586267	0.000161053	0.00570824	Promoter (<=1kb)	chr11	97854307	97884154	29848	-	72973	uc007lfb.1	-73	ENSMUSG00000070336	Fbxo47	F-box protein 47
913	chr11	98149175	98149251	77	*	9.37023e-05	4.04548e-05	0.00135417	-0.00131445	Promoter (<=1kb)	chr11	98082554	98149616	67063	-	72194	uc007lfm.1	365	ENSMUSG00000020883	Fbxl20	F-box and leucine-rich repeat protein 20
914	chr11	98150450	98150521	72	*	1.1037e-07	3.35627e-05	0.00349345	-0.00345988	Promoter (<=1kb)	chr11	98082554	98150163	67610	-	72194	uc009vah.1	-287	ENSMUSG00000020883	Fbxl20	F-box and leucine-rich repeat protein 20
915	chr11	98193093	98193170	78	*	4.39108e-05	0.00177006	4.75252e-05	0.00172202	Promoter (<=1kb)	chr11	98152155	98193293	41139	-	19014	uc007lfo.1	123	ENSMUSG00000018160	Med1	mediator complex subunit 1
916	chr11	98202991	98203033	43	*	4.39294e-07	3.83269e-05	0.00330655	-0.00326822	Promoter (<=1kb)	chr11	98203305	98225325	22021	+	69131	uc007lfr.2	-314	ENSMUSG00000003119	Cdk12	cyclin-dependent kinase 12
917	chr11	98203110	98203127	18	*	0.000123794	0.000764361	3.69351e-05	0.000727425	Promoter (<=1kb)	chr11	98203305	98225325	22021	+	69131	uc007lfr.2	-195	ENSMUSG00000003119	Cdk12	cyclin-dependent kinase 12
918	chr11	98338578	98338594	17	*	1.34652e-183	3.18732e-05	0.0127912	-0.0127593	Distal Intergenic	chr11	98325417	98329645	4229	-	18013	uc009vai.1	-8933	ENSMUSG00000038255	Neurod2	neurogenic differentiation 2
919	chr11	98339078	98339085	8	*	2.54302e-139	2.95865e-05	0.00589429	-0.0058647	Distal Intergenic	chr11	98325417	98329645	4229	-	18013	uc009vai.1	-9433	ENSMUSG00000038255	Neurod2	neurogenic differentiation 2
920	chr11	98342672	98342715	44	*	1.49743e-07	0.366924	0.0032403	0.363684	Distal Intergenic	chr11	98348738	98357795	9058	+	19049	uc007lfz.1	-6066	ENSMUSG00000061718	Ppp1r1b	protein phosphatase 1, regulatory (inhibitor) subunit 1B
921	chr11	98438872	98438977	106	*	4.43511e-05	0.00632958	8.14968e-05	0.00622649	Promoter (<=1kb)	chr11	98437708	98438988	1281	-	103742	uc007lgj.1	11	ENSMUSG00000002580	Mien1	migration and invasion enhancer 1
922	chr11	98682697	98682858	162	*	0.000136775	0.000206714	0.018295	-0.0180312	Promoter (<=1kb)	chr11	98682554	98692517	9964	+	22123	uc007lgw.1	304	ENSMUSG00000017221	Psmd3	proteasome (prosome, macropain) 26S subunit, non-ATPase, 3
923	chr11	98741831	98741865	35	*	0.000470124	3.11146e-05	0.000479497	-0.000448383	Promoter (<=1kb)	chr11	98741873	98757695	15823	+	21833	uc007lhd.1	-42	ENSMUSG00000058756	Thra	thyroid hormone receptor alpha
924	chr11	98742228	98742275	48	*	9.73518e-08	0.375956	0.00460117	0.371224	Promoter (<=1kb)	chr11	98741873	98757695	15823	+	21833	uc007lhd.1	402	ENSMUSG00000058756	Thra	thyroid hormone receptor alpha
925	chr11	98742276	98742276	1	*	2.36591e-05	6.1195e-05	0.00481402	-0.00475282	Promoter (<=1kb)	chr11	98741873	98757695	15823	+	21833	uc007lhd.1	403	ENSMUSG00000058756	Thra	thyroid hormone receptor alpha
926	chr11	98742281	98742281	1	*	2.33185e-07	0.372909	0.00419484	0.368714	Promoter (<=1kb)	chr11	98741873	98757695	15823	+	21833	uc007lhd.1	408	ENSMUSG00000058756	Thra	thyroid hormone receptor alpha
927	chr11	98775055	98775055	1	*	3.7365e-07	0.373	0.00458702	0.368413	Promoter (<=1kb)	chr11	98767932	98775377	7446	-	217166	uc007lhh.2	322	ENSMUSG00000020889	Nr1d1	nuclear receptor subfamily 1, group D, member 1
928	chr11	98775077	98775077	1	*	0.000100642	0.000112427	0.00723407	-0.00712165	Promoter (<=1kb)	chr11	98767932	98775377	7446	-	217166	uc007lhh.2	300	ENSMUSG00000020889	Nr1d1	nuclear receptor subfamily 1, group D, member 1
929	chr11	98775078	98775110	33	*	3.00517e-07	0.354045	0.00376124	0.350283	Promoter (<=1kb)	chr11	98767932	98775377	7446	-	217166	uc007lhh.2	267	ENSMUSG00000020889	Nr1d1	nuclear receptor subfamily 1, group D, member 1
930	chr11	98795253	98795336	84	*	0.00098287	0.0091753	0.00201363	0.00716167	Promoter (<=1kb)	chr11	98795769	98801038	5270	+	74026	uc007lhi.2	-516	ENSMUSG00000052915	Msl1	male-specific lethal 1 homolog (Drosophila)
931	chr11	98795566	98795566	1	*	0.00822847	0.0091321	0.151928	-0.142796	Promoter (<=1kb)	chr11	98795769	98801038	5270	+	74026	uc007lhi.2	-203	ENSMUSG00000052915	Msl1	male-specific lethal 1 homolog (Drosophila)
932	chr11	98795619	98795708	90	*	7.89486e-12	0.385011	0.000937315	0.384055	Promoter (<=1kb)	chr11	98795769	98801038	5270	+	74026	uc007lhi.2	-150	ENSMUSG00000052915	Msl1	male-specific lethal 1 homolog (Drosophila)
933	chr11	98796022	98796170	149	*	7.68441e-08	3.44568e-05	0.00512333	-0.00509128	Promoter (<=1kb)	chr11	98795769	98801038	5270	+	74026	uc007lhi.2	401	ENSMUSG00000052915	Msl1	male-specific lethal 1 homolog (Drosophila)
934	chr11	98809869	98809876	8	*	7.47177e-06	2.95605e-05	0.00045395	-0.000424389	Promoter (<=1kb)	chr11	98809808	98833807	24000	+	192160	uc011yeh.1	68	ENSMUSG00000078676	Casc3	cancer susceptibility candidate 3
935	chr11	98810077	98810119	43	*	4.97512e-05	3.50558e-05	0.00138553	-0.00135047	Promoter (<=1kb)	chr11	98798309	98810089	11781	-	100037262	uc007lhl.1	0	ENSMUSG00000075576	Gm12359	predicted gene 12359
936	chr11	98836799	98836805	7	*	2.74921e-10	0.383955	0.00188567	0.382069	Promoter (<=1kb)	chr11	98836785	98853005	16221	+	268480	uc007lhr.1	20	ENSMUSG00000038020	Rapgefl1	Rap guanine nucleotide exchange factor (GEF)-like 1
937	chr11	98836808	98836808	1	*	3.5473e-07	3.25097e-05	0.00221647	-0.00218396	Promoter (<=1kb)	chr11	98836785	98853005	16221	+	268480	uc007lhr.1	23	ENSMUSG00000038020	Rapgefl1	Rap guanine nucleotide exchange factor (GEF)-like 1
938	chr11	98836811	98837141	331	*	1.05179e-08	0.00483127	5.52398e-05	0.00479975	Promoter (<=1kb)	chr11	98836785	98853005	16221	+	268480	uc007lhr.1	356	ENSMUSG00000038020	Rapgefl1	Rap guanine nucleotide exchange factor (GEF)-like 1
939	chr11	98982512	98982552	41	*	2.29978e-06	0.00131411	3.48514e-05	0.00127925	Promoter (<=1kb)	chr11	98982180	98983016	837	-	353155	uc007lib.1	464	ENSMUSG00000047197	Gjd3	gap junction protein, delta 3
940	chr11	99041281	99041351	71	*	2.26408e-10	0.435526	0.00127352	0.433787	Promoter (<=1kb)	chr11	99041260	99052643	11384	+	16010	uc007lie.1	91	ENSMUSG00000017493	Igfbp4	insulin-like growth factor binding protein 4
941	chr11	99385981	99386089	109	*	4.18238e-09	0.376603	0.00158088	0.374598	Exon (uc007lir.2/16661, exon 7 of 8)	chr11	99385256	99389364	4109	-	16661	uc007lir.2	3275	ENSMUSG00000019761	Krt10	keratin 10
942	chr11	100319917	100319935	19	*	9.88131e-324	2.95377e-05	0.438903	-0.438873	Promoter (<=1kb)	chr11	100319996	100322096	2101	+	20918	uc007lkv.1	-79	ENSMUSG00000035530	Eif1	eukaryotic translation initiation factor 1
943	chr11	100320283	100320400	118	*	8.90383e-06	0.00163731	3.47325e-05	0.00160133	Promoter (<=1kb)	chr11	100319996	100322096	2101	+	20918	uc007lkv.1	404	ENSMUSG00000035530	Eif1	eukaryotic translation initiation factor 1
944	chr11	100619481	100619481	1	*	1.44207e-08	0.000142289	0.015819	-0.0156767	Promoter (<=1kb)	chr11	100582836	100620168	37333	-	56354	uc007lls.1	687	ENSMUSG00000014195	Dnajc7	DnaJ (Hsp40) homolog, subfamily C, member 7
945	chr11	100619600	100619690	91	*	9.78204e-13	0.384262	0.000640631	0.383622	Promoter (<=1kb)	chr11	100582836	100620168	37333	-	56354	uc007lls.1	478	ENSMUSG00000014195	Dnajc7	DnaJ (Hsp40) homolog, subfamily C, member 7
946	chr11	100712136	100712136	1	*	1.33343e-09	0.383165	0.00189359	0.381271	Promoter (<=1kb)	chr11	100704746	100712467	7722	-	14534	uc007lma.2	331	ENSMUSG00000020918	Kat2a	K(lysine) acetyltransferase 2A
947	chr11	100712144	100712145	2	*	1.58919e-05	3.2359e-05	0.00174606	-0.0017137	Promoter (<=1kb)	chr11	100704746	100712467	7722	-	14534	uc007lma.2	322	ENSMUSG00000020918	Kat2a	K(lysine) acetyltransferase 2A
948	chr11	100712161	100712193	33	*	1.85276e-11	0.384743	0.00103966	0.383703	Promoter (<=1kb)	chr11	100704746	100712467	7722	-	14534	uc007lma.2	274	ENSMUSG00000020918	Kat2a	K(lysine) acetyltransferase 2A
949	chr11	100860305	100860359	55	*	1.57433e-05	0.00298399	5.22528e-05	0.00293174	Promoter (<=1kb)	chr11	100860484	100877308	16825	+	20850	uc007lmn.1	-179	ENSMUSG00000004043	Stat5a	signal transducer and activator of transcription 5A
950	chr11	101315830	101315903	74	*	5.27927e-11	0.382369	0.0016264	0.380729	Promoter (<=1kb)	chr11	101316251	101317213	963	+	19192	uc007lom.1	-421	ENSMUSG00000078652	Psme3	proteaseome (prosome, macropain) activator subunit 3 (PA28 gamma, Ki)
951	chr11	101417307	101417405	99	*	2.03148e-05	3.29504e-05	0.00166785	-0.0016349	Promoter (<=1kb)	chr11	101406840	101417433	10594	-	69684	uc007los.1	28	ENSMUSG00000075528	Aarsd1	alanyl-tRNA synthetase domain containing 1
952	chr11	101468226	101468356	131	*	3.0825e-06	0.0124744	0.000220382	0.0122541	Promoter (<=1kb)	chr11	101468338	101471306	2969	+	11858	uc007lpb.1	0	ENSMUSG00000001313	Rnd2	Rho family GTPase 2
953	chr11	101468519	101468519	1	*	2.94406e-09	0.369719	0.00211638	0.367602	Promoter (<=1kb)	chr11	101468338	101471306	2969	+	11858	uc007lpb.1	181	ENSMUSG00000001313	Rnd2	Rho family GTPase 2
954	chr11	101551970	101551970	1	*	0.000572518	0.174486	0.00980663	0.164679	Promoter (<=1kb)	chr11	101488764	101551955	63192	-	12189	uc007lpd.2	-15	ENSMUSG00000017146	Brca1	breast cancer 1
955	chr11	101582223	101582299	77	*	1.13149e-06	0.00896609	6.06549e-05	0.00890543	Promoter (<=1kb)	chr11	101582242	101591785	9544	+	217203	uc007lpl.1	0	ENSMUSG00000034947	Tmem106a	transmembrane protein 106A
956	chr11	101733065	101733065	1	*	0.000237051	0.000575661	3.50016e-05	0.00054066	Promoter (<=1kb)	chr11	101732956	101767357	34402	+	217207	uc007lpr.1	109	ENSMUSG00000034931	Dhx8	DEAH (Asp-Glu-Ala-His) box polypeptide 8
957	chr11	101785316	101785411	96	*	0.000609332	6.77921e-05	0.00196293	-0.00188682	Promoter (<=1kb)	chr11	101769742	101785310	15569	-	18612	uc007lpt.1	-6	ENSMUSG00000017724	Etv4	ets variant 4
958	chr11	101984913	101984926	14	*	0.000544255	0.000408493	0.00708545	-0.00667696	Promoter (<=1kb)	chr11	101971144	101984791	13648	-	72349	uc007lqa.2	-122	ENSMUSG00000003518	Dusp3	dual specificity phosphatase 3 (vaccinia virus phosphatase VH1-related)
959	chr11	102156337	102156337	1	*	1.0726e-05	3.13046e-05	0.00193469	-0.00190339	Promoter (<=1kb)	chr11	102152547	102156407	3861	-	76547	uc007lqr.2	70	ENSMUSG00000020921	Tmem101	transmembrane protein 101
960	chr11	102156363	102156383	21	*	9.53005e-10	0.383994	0.001803	0.382191	Promoter (<=1kb)	chr11	102152547	102156407	3861	-	76547	uc007lqr.2	24	ENSMUSG00000020921	Tmem101	transmembrane protein 101
961	chr11	102185259	102185279	21	*	1.11179e-09	0.00534257	3.52255e-05	0.00530734	Promoter (<=1kb)	chr11	102163489	102185256	21768	-	268490	uc007lqs.1	-3	ENSMUSG00000020922	Lsm12	LSM12 homolog (S. cerevisiae)
962	chr11	102189689	102189735	47	*	2.77495e-05	4.99387e-05	0.00345868	-0.00341368	Promoter (<=1kb)	chr11	102189699	102194081	4383	+	68401	uc007lqt.2	0	ENSMUSG00000034793	G6pc3	glucose 6 phosphatase, catalytic, 3
963	chr11	102249053	102249194	142	*	3.04433e-07	0.00393812	4.32262e-05	0.00389689	Promoter (<=1kb)	chr11	102248882	102265183	16302	+	217216	uc007lqz.1	312	ENSMUSG00000034773	BC030867	cDNA sequence BC030867
964	chr11	102297078	102297086	9	*	2.26821e-18	0.00424451	3.06437e-05	0.00421386	Promoter (<=1kb)	chr11	102289300	102296629	7330	-	217218	uc007lrg.1	-449	ENSMUSG00000059995	Atxn7l3	ataxin 7-like 3
965	chr11	102317618	102317618	1	*	0.0109554	0.0597467	0.00384633	0.0559004	Promoter (<=1kb)	chr11	102308894	102317654	8761	-	21429	uc007lrn.1	36	ENSMUSG00000020923	Ubtf	upstream binding transcription factor, RNA polymerase I
966	chr11	102317720	102317734	15	*	3.13972e-06	0.00790511	9.43223e-05	0.00781079	Promoter (<=1kb)	chr11	102308894	102317654	8761	-	21429	uc007lrn.1	-66	ENSMUSG00000020923	Ubtf	upstream binding transcription factor, RNA polymerase I
967	chr11	102317901	102318003	103	*	1.1568e-07	9.97599e-05	0.0481829	-0.0480832	Promoter (<=1kb)	chr11	102308894	102317654	8761	-	21429	uc007lrn.1	-247	ENSMUSG00000020923	Ubtf	upstream binding transcription factor, RNA polymerase I
968	chr11	102318235	102318306	72	*	4.15918e-11	0.00172585	3.02054e-05	0.00169564	Promoter (<=1kb)	chr11	102308894	102317654	8761	-	21429	uc007lrn.1	-581	ENSMUSG00000020923	Ubtf	upstream binding transcription factor, RNA polymerase I
969	chr11	102320139	102320208	70	*	0.000441852	5.66422e-05	0.00227153	-0.00221489	Promoter (1-2kb)	chr11	102304563	102319096	14534	-	21429	uc007lrl.2	-1043	ENSMUSG00000020923	Ubtf	upstream binding transcription factor, RNA polymerase I
970	chr11	102467245	102467300	56	*	2.29946e-08	0.0052501	6.07136e-05	0.00518938	Promoter (<=1kb)	chr11	102456472	102467199	10728	-	16399	uc007lsa.1	-46	ENSMUSG00000034664	Itga2b	integrin alpha 2b
971	chr11	102924669	102924669	1	*	2.27952e-10	0.00632298	2.97366e-05	0.00629324	Promoter (<=1kb)	chr11	102905519	102925124	19606	-	70218	uc007lsy.2	455	ENSMUSG00000051378	Kif18b	kinesin family member 18B
972	chr11	102924800	102924823	24	*	1.40288e-05	0.000781121	3.35466e-05	0.000747574	Promoter (<=1kb)	chr11	102905519	102925124	19606	-	70218	uc007lsy.2	301	ENSMUSG00000051378	Kif18b	kinesin family member 18B
973	chr11	102925217	102925265	49	*	0.000189298	0.0341132	0.00074295	0.0333702	Promoter (<=1kb)	chr11	102905519	102925124	19606	-	70218	uc007lsy.2	-93	ENSMUSG00000051378	Kif18b	kinesin family member 18B
974	chr11	103102827	103102897	71	*	1.53386e-07	0.00493032	6.76097e-05	0.00486271	Promoter (<=1kb)	chr11	103103106	103104553	1448	+	67131	uc007ltj.1	-279	ENSMUSG00000056938	Acbd4	acyl-Coenzyme A binding domain containing 4
975	chr11	103117037	103117087	51	*	1.41629e-05	0.310899	0.00774062	0.303159	Promoter (<=1kb)	chr11	103116325	103119724	3400	+	192231	uc007lto.1	762	ENSMUSG00000048878	Hexim1	hexamethylene bis-acetamide inducible 1
976	chr11	103731093	103731103	11	*	0.00101653	0.90711	0.984768	-0.0776576	Exon (uc007lvr.1/22412, exon 4 of 4)	chr11	103727363	103749821	22459	-	22412	uc007lvr.1	18718	ENSMUSG00000018486	Wnt9b	wingless-type MMTV integration site family, member 9B
977	chr11	103995486	103995545	60	*	6.32685e-06	0.765071	0.487338	0.277542	Distal Intergenic	chr11	103966871	103985350	18480	+	11841	uc007lvy.2	28674	ENSMUSG00000062421	Arf2	ADP-ribosylation factor 2
978	chr11	105181855	105181899	45	*	9.54655e-05	3.04884e-05	0.000822402	-0.000791913	Promoter (<=1kb)	chr11	105181527	105276873	95347	+	24086	uc007lxd.3	372	ENSMUSG00000020694	Tlk2	tousled-like kinase 2 (Arabidopsis)
979	chr11	105589531	105589616	86	*	1.3824e-06	4.08583e-05	0.00825246	-0.00821252	Promoter (<=1kb)	chr11	105589986	105929303	339318	+	77097	uc007lxm.1	-455	ENSMUSG00000053580	Tanc2	tetratricopeptide repeat, ankyrin repeat and coiled-coil containing 2
980	chr11	105589660	105589754	95	*	5.64691e-05	0.00135132	4.58589e-05	0.00130546	Promoter (<=1kb)	chr11	105589986	105929303	339318	+	77097	uc007lxm.1	-326	ENSMUSG00000053580	Tanc2	tetratricopeptide repeat, ankyrin repeat and coiled-coil containing 2
981	chr11	106084943	106085121	179	*	1.66224e-08	0.00396019	3.94303e-05	0.00392134	Promoter (<=1kb)	chr11	106084902	106155434	70533	+	26406	uc007lyc.1	219	ENSMUSG00000020700	Map3k3	mitogen-activated protein kinase kinase kinase 3
982	chr11	106193723	106193778	56	*	0.000488381	0.000271808	0.00827045	-0.00799864	Promoter (<=1kb)	chr11	106162974	106193603	30630	-	72149	uc007lyf.2	-120	ENSMUSG00000069631	Strada	STE20-related kinase adaptor alpha
983	chr11	106272503	106272531	29	*	1.75987e-10	0.384281	0.00150576	0.382775	Promoter (<=1kb)	chr11	106263171	106272972	9802	-	83796	uc007lyp.2	441	ENSMUSG00000078619	Smarcd2	SWI/SNF related, matrix associated, actin dependent regulator of chromatin, subfamily d, member 2
984	chr11	106272538	106272538	1	*	3.09057e-05	3.14187e-05	0.00116009	-0.00112867	Promoter (<=1kb)	chr11	106263171	106272972	9802	-	83796	uc007lyp.2	434	ENSMUSG00000078619	Smarcd2	SWI/SNF related, matrix associated, actin dependent regulator of chromatin, subfamily d, member 2
985	chr11	106272541	106272541	1	*	1.14075e-11	0.384487	0.000988372	0.383498	Promoter (<=1kb)	chr11	106263171	106272972	9802	-	83796	uc007lyp.2	431	ENSMUSG00000078619	Smarcd2	SWI/SNF related, matrix associated, actin dependent regulator of chromatin, subfamily d, member 2
986	chr11	106272548	106272548	1	*	4.29312e-05	3.15843e-05	0.00105942	-0.00102783	Promoter (<=1kb)	chr11	106263171	106272972	9802	-	83796	uc007lyp.2	424	ENSMUSG00000078619	Smarcd2	SWI/SNF related, matrix associated, actin dependent regulator of chromatin, subfamily d, member 2
987	chr11	106272995	106273035	41	*	5.98355e-06	0.00253115	5.19364e-05	0.00247922	Promoter (<=1kb)	chr11	106263171	106272972	9802	-	83796	uc007lyp.2	-23	ENSMUSG00000078619	Smarcd2	SWI/SNF related, matrix associated, actin dependent regulator of chromatin, subfamily d, member 2
988	chr11	106487793	106487814	22	*	3.10204e-15	0.384619	0.00032598	0.384235	Promoter (<=1kb)	chr11	106397620	106487796	90177	-	78943	uc007lyy.1	0	ENSMUSG00000020715	Ern1	endoplasmic reticulum (ER) to nucleus signalling 1
989	chr11	106501072	106501334	263	*	7.60135e-05	0.00488262	8.48949e-05	0.00479772	Promoter (<=1kb)	chr11	106500991	106501063	73	+	100216537	uc011ygj.1	343	ENSMUSG00000065126	Snord104	small nucleolar RNA, C/D box 104
990	chr11	106919727	106919731	5	*	1.88962e-07	0.00533944	5.09292e-05	0.00528851	Promoter (<=1kb)	chr11	106820064	106920715	100652	-	66313	uc007lzx.2	984	ENSMUSG00000018363	Smurf2	SMAD specific E3 ubiquitin protein ligase 2
991	chr11	106920095	106920134	40	*	1.64499e-07	4.02371e-05	0.00494177	-0.0049015	Promoter (<=1kb)	chr11	106820064	106920715	100652	-	66313	uc007lzx.2	581	ENSMUSG00000018363	Smurf2	SMAD specific E3 ubiquitin protein ligase 2
992	chr11	106920190	106920214	25	*	7.39439e-13	0.378277	0.000674596	0.377603	Promoter (<=1kb)	chr11	106820064	106920715	100652	-	66313	uc007lzx.2	501	ENSMUSG00000018363	Smurf2	SMAD specific E3 ubiquitin protein ligase 2
993	chr11	106920422	106920432	11	*	0.000521064	0.013197	0.000327341	0.0128426	Promoter (<=1kb)	chr11	106820064	106920715	100652	-	66313	uc007lzx.2	283	ENSMUSG00000018363	Smurf2	SMAD specific E3 ubiquitin protein ligase 2
994	chr11	106920648	106920736	89	*	9.16714e-06	3.10399e-05	0.00185718	-0.00182581	Promoter (<=1kb)	chr11	106820064	106920715	100652	-	66313	uc007lzx.2	0	ENSMUSG00000018363	Smurf2	SMAD specific E3 ubiquitin protein ligase 2
995	chr11	106920859	106920954	96	*	0.0025803	0.0594522	0.00221539	0.0572369	Promoter (<=1kb)	chr11	106820064	106920715	100652	-	66313	uc007lzx.2	-144	ENSMUSG00000018363	Smurf2	SMAD specific E3 ubiquitin protein ligase 2
996	chr11	106998866	106998866	1	*	0.00361511	0.0707745	0.00443394	0.0663406	Promoter (<=1kb)	chr11	106988629	106999525	10897	-	16647	uc007lzz.1	659	ENSMUSG00000018362	Kpna2	karyopherin (importin) alpha 2
997	chr11	106999153	106999199	47	*	3.904e-11	0.382472	0.00104817	0.381424	Promoter (<=1kb)	chr11	106988629	106999525	10897	-	16647	uc007lzz.1	326	ENSMUSG00000018362	Kpna2	karyopherin (importin) alpha 2
998	chr11	107027913	107027933	21	*	9.67327e-06	0.0965601	0.00112184	0.0954299	Promoter (<=1kb)	chr11	107028223	107030442	2220	+	69066	uc007mab.2	-310	#N/A	1810010H24Rik	RIKEN cDNA 1810010H24 gene
999	chr11	107028089	107028096	8	*	0.00026904	2.97993e-05	0.000480659	-0.000450859	Promoter (<=1kb)	chr11	107028223	107030442	2220	+	69066	uc007mab.2	-134	#N/A	1810010H24Rik	RIKEN cDNA 1810010H24 gene
1000	chr11	107028366	107028366	1	*	0.00743339	0.0741185	0.00514243	0.0689761	Promoter (<=1kb)	chr11	107028223	107030442	2220	+	69066	uc007mab.2	143	#N/A	1810010H24Rik	RIKEN cDNA 1810010H24 gene
1001	chr11	107132099	107132203	105	*	8.73149e-07	0.00116273	3.17326e-05	0.00113184	Promoter (<=1kb)	chr11	107033081	107131922	98842	-	207165	uc007mac.1	-177	ENSMUSG00000040481	Bptf	bromodomain PHD finger transcription factor
1002	chr11	107546893	107546929	37	*	1.39603e-05	0.00147644	3.55825e-05	0.00144086	Promoter (1-2kb)	chr11	107547960	107672287	124328	+	78455	uc007mau.1	-1067	ENSMUSG00000020721	Helz	helicase with zinc finger domain
1003	chr11	107547415	107547439	25	*	9.81739e-13	3.37011e-05	0.00395141	-0.00391771	Promoter (<=1kb)	chr11	107547960	107672287	124328	+	78455	uc007mau.1	-545	ENSMUSG00000020721	Helz	helicase with zinc finger domain
1004	chr11	108425181	108425303	123	*	6.631e-08	0.00363196	3.3937e-05	0.00359802	Promoter (<=1kb)	chr11	108425266	108472793	47528	+	76380	uc007mbq.1	0	ENSMUSG00000020728	Cep112	centrosomal protein 112
1005	chr11	108921657	108921737	81	*	1.11292e-07	5.27772e-05	0.00834083	-0.00828805	Promoter (1-2kb)	chr11	108920349	108950781	30433	+	12006	uc007mbu.2	1388	ENSMUSG00000000142	Axin2	axin2
1006	chr11	108922024	108922080	57	*	5.60564e-07	0.399008	0.00793729	0.391071	Promoter (1-2kb)	chr11	108920349	108950781	30433	+	12006	uc007mbu.2	1731	ENSMUSG00000000142	Axin2	axin2
1007	chr11	109362639	109362673	35	*	2.82467e-06	0.00125103	3.58781e-05	0.00121677	Promoter (<=1kb)	chr11	109362794	109380474	17681	+	14674	uc007mcd.1	-155	ENSMUSG00000020611	Gna13	guanine nucleotide binding protein, alpha 13
1008	chr11	109362854	109362940	87	*	5.10218e-07	5.33553e-05	0.00591389	-0.00586053	Promoter (<=1kb)	chr11	109362794	109380474	17681	+	14674	uc007mcd.1	146	ENSMUSG00000020611	Gna13	guanine nucleotide binding protein, alpha 13
1009	chr11	109440084	109440133	50	*	4.43381e-05	3.10746e-05	0.00122374	-0.00119267	Promoter (<=1kb)	chr11	109440078	109453359	13282	+	100503496	uc007mck.2	55	#N/A	LOC100503496	uncharacterized LOC100503496
1010	chr11	109472497	109472554	58	*	5.7331e-05	3.75275e-05	0.00139959	-0.00136102	Promoter (<=1kb)	chr11	109450856	109473229	22374	-	104681	uc007mcl.1	675	ENSMUSG00000041920	Slc16a6	solute carrier family 16 (monocarboxylic acid transporters), member 6
1011	chr11	109472591	109472632	42	*	2.89254e-08	0.365932	0.00250386	0.363428	Promoter (<=1kb)	chr11	109450856	109473229	22374	-	104681	uc007mcl.1	597	ENSMUSG00000041920	Slc16a6	solute carrier family 16 (monocarboxylic acid transporters), member 6
1012	chr11	109473330	109473445	116	*	5.91377e-05	3.25598e-05	0.00102097	-0.000988257	Promoter (<=1kb)	chr11	109473374	109573329	99956	+	74008	uc007mcn.1	0	ENSMUSG00000020604	Arsg	arylsulfatase G
1013	chr11	109611266	109611380	115	*	6.54867e-05	2.97575e-05	0.000624616	-0.000594969	Promoter (<=1kb)	chr11	109573521	109611389	37869	-	52639	uc007mcq.1	9	ENSMUSG00000041895	Wipi1	WD repeat domain, phosphoinositide interacting 1
1014	chr11	109650945	109650945	1	*	0.00562273	0.00024146	0.00429315	-0.00405169	Promoter (<=1kb)	chr11	109650949	109669648	18700	+	19084	uc007mcu.1	-4	ENSMUSG00000020612	Prkar1a	protein kinase, cAMP dependent regulatory, type I, alpha
1015	chr11	109651032	109651216	185	*	9.1933e-07	0.00208175	3.82532e-05	0.00204545	Promoter (<=1kb)	chr11	109650949	109669648	18700	+	19084	uc007mcu.1	267	ENSMUSG00000020612	Prkar1a	protein kinase, cAMP dependent regulatory, type I, alpha
1016	chr11	113649538	113649586	49	*	4.17375e-06	0.00256754	4.74515e-05	0.00252008	Promoter (<=1kb)	chr11	113649529	113662401	12873	+	16834	uc007mer.2	57	ENSMUSG00000018661	Cog1	component of oligomeric golgi complex 1
1017	chr11	113683736	113683830	95	*	6.7145e-05	3.15394e-05	0.00110716	-0.00107562	Promoter (<=1kb)	chr11	113661319	113683922	22604	-	28081	uc007met.1	92	ENSMUSG00000041629	Fam104a	family with sequence similarity 104, member A
1018	chr11	113683996	113684004	9	*	0.00123013	0.0927117	0.00448605	0.0879845	Promoter (<=1kb)	chr11	113661319	113683922	22604	-	28081	uc007met.1	-74	ENSMUSG00000041629	Fam104a	family with sequence similarity 104, member A
1019	chr11	113684164	113684176	13	*	6.81093e-06	0.0028671	0.279087	-0.27622	Promoter (<=1kb)	chr11	113661319	113684151	22833	-	28081	uc007meu.1	-13	ENSMUSG00000041629	Fam104a	family with sequence similarity 104, member A
1020	chr11	113751740	113751785	46	*	2.62164e-07	0.00286497	3.63474e-05	0.00282689	Promoter (<=1kb)	chr11	113726850	113751815	24966	-	56699	uc007mfc.2	30	ENSMUSG00000041598	Cdc42ep4	CDC42 effector protein (Rho GTPase binding) 4
1021	chr11	114765121	114765121	1	*	0.000718549	0.0164025	0.0536143	-0.0372118	Promoter (<=1kb)	chr11	114765389	114790575	25187	+	286942	uc007mfq.1	-268	ENSMUSG00000010021	Kif19a	kinesin family member 19A
1022	chr11	114765243	114765243	1	*	0.000137044	3.45228e-05	0.000877939	-0.000843416	Promoter (<=1kb)	chr11	114765389	114790575	25187	+	286942	uc007mfq.1	-146	ENSMUSG00000010021	Kif19a	kinesin family member 19A
1023	chr11	114765310	114765338	29	*	3.53108e-07	0.298162	0.00152987	0.296632	Promoter (<=1kb)	chr11	114765389	114790575	25187	+	286942	uc007mfq.1	-79	ENSMUSG00000010021	Kif19a	kinesin family member 19A
1024	chr11	115187494	115187562	69	*	2.50341e-06	0.00128735	3.68181e-05	0.00125053	Promoter (<=1kb)	chr11	115187487	115231128	43642	+	320534	uc007mgt.2	75	ENSMUSG00000045980	Tmem104	transmembrane protein 104
1025	chr11	115491656	115491797	142	*	1.05691e-05	3.20185e-05	0.00155219	-0.00152062	Promoter (<=1kb)	chr11	115490426	115491814	1389	-	50773	uc007mhu.1	17	ENSMUSG00000020736	Nt5c	5',3'-nucleotidase, cytosolic
1026	chr11	115536251	115536299	49	*	1.28928e-06	0.000995753	3.02639e-05	0.000965489	Promoter (<=1kb)	chr11	115523109	115536230	13122	-	170930	uc007mhw.1	-21	ENSMUSG00000020738	Sumo2	small ubiquitin-like modifier 2
1027	chr11	115604980	115604991	12	*	0.00124026	0.617857	0.373752	0.244105	Promoter (<=1kb)	chr11	115604151	115607624	3474	+	50529	uc007mia.1	840	ENSMUSG00000046756	Mrps7	mitchondrial ribosomal protein S7
1028	chr11	115765252	115765280	29	*	0.000222667	0.000427787	0.0256442	-0.0252164	Promoter (<=1kb)	chr11	115765433	115799033	33601	+	71947	uc007mil.1	-181	ENSMUSG00000020747	2310067B10Rik	RIKEN cDNA 2310067B10 gene
1029	chr11	115881736	115881768	33	*	0.00039094	0.917722	0.990806	-0.0729269	5' UTR	chr11	115900139	115906269	6131	+	66528	uc007mja.2	-18403	ENSMUSG00000048442	Smim5	small integral membrane protein 5
1030	chr11	116167889	116167968	80	*	1.74464e-07	3.38625e-05	0.00287312	-0.00283926	Promoter (<=1kb)	chr11	116142285	116168148	25864	-	217335	uc007mkg.2	180	ENSMUSG00000020776	Fbf1	Fas (TNFRSF6) binding factor 1
1031	chr11	116199002	116199102	101	*	4.36922e-07	3.785e-05	0.00223384	-0.00219586	Promoter (<=1kb)	chr11	116171883	116199045	27163	-	11430	uc007mkl.2	0	ENSMUSG00000020777	Acox1	acyl-Coenzyme A oxidase 1, palmitoyl
1032	chr11	116224163	116224166	4	*	0.000280691	0.904072	0.944853	-0.0407805	Exon (uc007mkp.1/14027, exon 22 of 22)	chr11	116216540	116220287	3748	+	69681	uc007mko.2	7626	ENSMUSG00000092300	Cdk3-ps	cyclin-dependent kinase 3, pseudogene
1033	chr11	116306570	116306828	259	*	2.88579e-13	0.383987	0.000565754	0.383488	Promoter (<=1kb)	chr11	116287998	116306738	18741	-	53413	uc007mkt.2	0	ENSMUSG00000020792	Exoc7	exocyst complex component 7
1034	chr11	116490150	116490189	40	*	1.71814e-10	0.00116662	3.03935e-05	0.00113645	Promoter (<=1kb)	chr11	116470816	116490346	19531	-	67763	uc007mld.2	157	ENSMUSG00000015869	Prpsap1	phosphoribosyl pyrophosphate synthetase-associated protein 1
1035	chr11	116490631	116490708	78	*	1.62574e-05	0.000158568	0.012104	-0.0119532	Promoter (<=1kb)	chr11	116470816	116490346	19531	-	67763	uc007mld.2	-285	ENSMUSG00000015869	Prpsap1	phosphoribosyl pyrophosphate synthetase-associated protein 1
1036	chr11	116803376	116803397	22	*	0.000210609	0.905965	0.993253	-0.0872303	Distal Intergenic	chr11	116803400	116828046	24647	-	67622	uc007mmf.2	24649	ENSMUSG00000020814	Mxra7	matrix-remodelling associated 7
1037	chr11	117265836	117265917	82	*	1.68671e-05	4.38306e-05	0.00285064	-0.00280681	Promoter (<=1kb)	chr11	117266246	117362325	96080	+	53860	uc007mne.2	-410	ENSMUSG00000059248	Sept9	septin 9
1038	chr11	117400621	117400636	16	*	0.000714128	0.477884	0.682277	-0.204393	Distal Intergenic	chr11	117332313	117362325	30013	+	53860	uc007mng.2	68323	ENSMUSG00000059248	Sept9	septin 9
1039	chr11	117824845	117824856	12	*	5.84865e-07	3.4695e-05	0.00192061	-0.00188591	Promoter (1-2kb)	chr11	117825919	117837234	11316	+	71562	uc007moa.2	-1074	ENSMUSG00000017718	Afmid	arylformamidase
1040	chr11	117963367	117963414	48	*	3.59082e-06	0.111832	0.00355455	0.10929	Distal Intergenic	chr11	117966087	117969366	3280	-	12702	uc007moi.2	5952	ENSMUSG00000053113	Socs3	suppressor of cytokine signaling 3
1041	chr11	117963653	117963653	1	*	0.000478833	0.00166357	0.0555637	-0.0539001	Distal Intergenic	chr11	117966087	117969366	3280	-	12702	uc007moi.2	5713	ENSMUSG00000053113	Socs3	suppressor of cytokine signaling 3
1042	chr11	118249028	118249029	2	*	1.97917e-11	0.382885	0.000843658	0.382042	Promoter (<=1kb)	chr11	118164166	118248592	84427	-	19157	uc011yil.1	-436	ENSMUSG00000017132	Cyth1	cytohesin 1
1043	chr11	118354989	118354999	11	*	1.74659e-10	0.37867	0.0013035	0.377366	Promoter (<=1kb)	chr11	118301061	118355411	54351	-	21858	uc007mow.1	412	ENSMUSG00000017466	Timp2	tissue inhibitor of metalloproteinase 2
1044	chr11	118355143	118355143	1	*	6.23994e-05	0.00308573	0.222593	-0.219507	Promoter (<=1kb)	chr11	118301061	118355411	54351	-	21858	uc007mow.1	268	ENSMUSG00000017466	Timp2	tissue inhibitor of metalloproteinase 2
1045	chr11	118418996	118419018	23	*	1.25324e-06	3.98763e-05	0.00728936	-0.00724949	Promoter (<=1kb)	chr11	118406289	118419086	12798	-	76025	uc007mpe.1	68	ENSMUSG00000025575	Cant1	calcium activated nucleotidase 1
1046	chr11	118419206	118419256	51	*	0.000179745	0.00865946	0.000283228	0.00837624	Promoter (<=1kb)	chr11	118406289	118419118	12830	-	76025	uc007mpb.2	-88	ENSMUSG00000025575	Cant1	calcium activated nucleotidase 1
1047	chr11	119085477	119085477	1	*	3.80188e-06	4.09243e-05	0.00501714	-0.00497621	Promoter (<=1kb)	chr11	119077571	119086237	8667	-	12418	uc007mpw.2	760	ENSMUSG00000039989	Cbx4	chromobox 4
1048	chr11	119085701	119085747	47	*	3.50436e-05	9.85895e-05	0.00460731	-0.00450701	Promoter (<=1kb)	chr11	119077571	119086237	8667	-	12418	uc007mpw.2	490	ENSMUSG00000039989	Cbx4	chromobox 4
1049	chr11	119090404	119090439	36	*	0.000128382	3.28847e-05	0.00136365	-0.00133076	Distal Intergenic	chr11	119077571	119086237	8667	-	12418	uc007mpw.2	-4167	ENSMUSG00000039989	Cbx4	chromobox 4
1050	chr11	119300084	119300287	204	*	6.87295e-05	0.00243689	5.73171e-05	0.00233713	Promoter (<=1kb)	chr11	119288363	119300043	11681	-	192170	uc007mqj.1	-41	ENSMUSG00000025580	Eif4a3	eukaryotic translation initiation factor 4A3
1051	chr11	119344551	119344564	14	*	7.31815e-05	0.356791	0.498376	-0.141585	3' UTR	chr11	119343489	119355510	12022	-	27029	uc007mql.1	10946	ENSMUSG00000005043	Sgsh	N-sulfoglucosamine sulfohydrolase (sulfamidase)
1052	chr11	119390075	119390111	37	*	3.30622e-08	0.00318243	4.15676e-05	0.00314086	Promoter (<=1kb)	chr11	119390472	119390561	90	+	100316690	uc011yis.1	-397	ENSMUSG00000088015	Mir1932	microRNA 1932
1053	chr11	119390202	119390277	76	*	6.63175e-13	3.24775e-05	0.00364366	-0.00361109	Promoter (<=1kb)	chr11	119390472	119390561	90	+	100316690	uc011yis.1	-270	ENSMUSG00000088015	Mir1932	microRNA 1932
1054	chr11	119390481	119390482	2	*	0.000123178	0.00417471	0.000114903	0.00405981	Promoter (<=1kb)	chr11	119390472	119390561	90	+	100316690	uc011yis.1	10	ENSMUSG00000088015	Mir1932	microRNA 1932
1055	chr11	119491762	119491819	58	*	1.53606e-05	0.00112957	4.00049e-05	0.00108951	Promoter (<=1kb)	chr11	119491620	119511465	19846	+	338371	uc007mqu.2	199	ENSMUSG00000039850	Endov	endonuclease V
1056	chr11	119997540	119997540	1	*	0.000788525	0.845459	0.925342	-0.0798824	Exon (uc007mrg.1/108100, exon 10 of 14)	chr11	120014767	120014853	87	+	100526518	uc011yiv.1	-17227	ENSMUSG00000105524	Mir3065	microRNA 3065
1057	chr11	120098609	120098659	51	*	7.76422e-06	6.19018e-05	0.00360373	-0.00354183	Promoter (<=1kb)	chr11	120090522	120098731	8210	-	78777	uc007mrq.1	72	ENSMUSG00000025377	Enthd2	ENTH domain containing 2
1058	chr11	120151222	120151306	85	*	8.09796e-08	0.377543	0.00380192	0.373867	Promoter (<=1kb)	chr11	120103951	120151351	47401	-	72055	uc007mrv.2	45	ENSMUSG00000061306	Slc38a10	solute carrier family 38, member 10
1059	chr11	120230405	120230405	1	*	0.00680543	0.0647877	0.007696	0.0570917	Promoter (2-3kb)	chr11	120232947	120292297	59351	+	268515	uc007msd.2	-2542	ENSMUSG00000039741	Bahcc1	BAH domain and coiled-coil containing 1
1060	chr11	120230924	120231050	127	*	2.85988e-11	0.00475922	3.48051e-05	0.00472442	Promoter (2-3kb)	chr11	120232947	120292297	59351	+	268515	uc007msd.2	-2023	ENSMUSG00000039741	Bahcc1	BAH domain and coiled-coil containing 1
1061	chr11	120231156	120231354	199	*	2.7571e-05	3.11196e-05	0.00139313	-0.00136196	Promoter (1-2kb)	chr11	120232947	120292297	59351	+	268515	uc007msd.2	-1791	ENSMUSG00000039741	Bahcc1	BAH domain and coiled-coil containing 1
1062	chr11	120231432	120231444	13	*	0.000275614	0.000969696	4.23351e-05	0.000927361	Promoter (1-2kb)	chr11	120232947	120292297	59351	+	268515	uc007msd.2	-1515	ENSMUSG00000039741	Bahcc1	BAH domain and coiled-coil containing 1
1063	chr11	120378270	120378368	99	*	5.13243e-05	3.13225e-05	0.00124463	-0.00121331	Promoter (<=1kb)	chr11	120369562	120378746	9185	-	71885	uc007msm.2	378	ENSMUSG00000025384	Faap100	Fanconi anemia core complex associated protein 100
1064	chr11	120378445	120378509	65	*	6.0657e-05	0.00132612	4.12108e-05	0.00128491	Promoter (<=1kb)	chr11	120369562	120378746	9185	-	71885	uc007msm.2	237	ENSMUSG00000025384	Faap100	Fanconi anemia core complex associated protein 100
1065	chr11	120484636	120484700	65	*	1.09651e-05	3.12171e-05	0.00188887	-0.00185765	Promoter (<=1kb)	chr11	120484669	120488754	4086	+	56282	uc007mta.1	0	ENSMUSG00000039640	Mrpl12	mitochondrial ribosomal protein L12
1066	chr11	120633529	120633565	37	*	0.000356439	0.000586337	3.65542e-05	0.000549783	Promoter (<=1kb)	chr11	120628351	120633547	5197	-	17134	uc007mtu.2	0	ENSMUSG00000051510	Mafg	v-maf musculoaponeurotic fibrosarcoma oncogene family, protein G (avian)
1067	chr11	120721587	120721624	38	*	1.80884e-05	7.74858e-05	0.00976968	-0.0096922	Promoter (<=1kb)	chr11	120721468	120723969	2502	+	170758	uc007mug.1	156	ENSMUSG00000018012	Rac3	RAS-related C3 botulinum substrate 3
1068	chr11	120784113	120784209	97	*	1.1608e-11	2.98401e-05	0.00220265	-0.00217296	Promoter (<=1kb)	chr11	120780745	120784204	3460	-	19719	uc007mum.1	0	ENSMUSG00000025158	Rfng	RFNG O-fucosylpeptide 3-beta-N-acetylglucosaminyltransferase
1069	chr11	120784235	120784235	1	*	3.62774e-09	0.384022	0.00285788	0.381165	Promoter (<=1kb)	chr11	120780745	120784204	3460	-	19719	uc007mum.1	-31	ENSMUSG00000025158	Rfng	RFNG O-fucosylpeptide 3-beta-N-acetylglucosaminyltransferase
1070	chr11	120784252	120784459	208	*	0.000133595	3.28641e-05	0.000800504	-0.000767639	Promoter (<=1kb)	chr11	120784272	120789097	4826	+	209318	uc007muo.2	0	ENSMUSG00000025156	Gps1	G protein pathway suppressor 1
1071	chr11	120784465	120784466	2	*	9.09215e-08	0.379478	0.00318716	0.376291	Promoter (<=1kb)	chr11	120784515	120789102	4588	+	209318	uc007muq.1	-50	ENSMUSG00000025156	Gps1	G protein pathway suppressor 1
1072	chr11	120990427	120990517	91	*	2.14406e-07	0.00547344	4.84684e-05	0.00541795	Promoter (<=1kb)	chr11	120958465	120991333	32869	-	104318	uc007muz.1	816	ENSMUSG00000025162	Csnk1d	casein kinase 1, delta
1073	chr11	120990728	120990768	41	*	8.23386e-06	3.84442e-05	0.00305584	-0.00301739	Promoter (<=1kb)	chr11	120958465	120991333	32869	-	104318	uc007muz.1	565	ENSMUSG00000025162	Csnk1d	casein kinase 1, delta
1074	chr11	121237515	121237527	13	*	3.16084e-05	4.88449e-05	0.00295771	-0.00290682	Promoter (<=1kb)	chr11	121237236	121255856	18621	+	67608	uc007mvq.2	291	ENSMUSG00000000056	Narf	nuclear prelamin A recognition factor
1075	chr11	121353941	121353990	50	*	6.99201e-06	0.378851	0.013421	0.36543	Promoter (<=1kb)	chr11	121327203	121354447	27245	-	66840	uc007mvt.2	457	ENSMUSG00000025173	Wdr45b	WD repeat domain 45B
1076	chr11	121388203	121388234	32	*	7.05649e-06	0.0020422	4.73484e-05	0.00199582	Promoter (<=1kb)	chr11	121356121	121388251	32131	-	217371	uc007mvu.2	17	ENSMUSG00000025170	Rab40b	Rab40B, member RAS oncogene family
1077	chr11	121421645	121421764	120	*	1.09929e-05	0.00313589	4.20413e-05	0.00309818	Promoter (<=1kb)	chr11	121421373	121430768	9396	+	238024	uc007mvv.2	391	ENSMUSG00000039253	Fn3krp	fructosamine 3 kinase related protein
1078	chr11	121452138	121452176	39	*	3.10812e-09	0.00165137	3.03453e-05	0.00162103	Promoter (<=1kb)	chr11	121451949	121617170	165222	+	108903	uc007mvy.2	227	ENSMUSG00000039230	Tbcd	tubulin-specific chaperone d
1079	chr11	121672956	121672973	18	*	1.18119e-05	0.000827181	3.47135e-05	0.000792468	Promoter (<=1kb)	chr11	121616208	121673151	56944	-	210004	uc007mwb.2	178	ENSMUSG00000046605	B3gntl1	UDP-GlcNAc:betaGal beta-1,3-N-acetylglucosaminyltransferase-like 1
1080	chr12	3572382	3572429	48	*	0.000256649	2.97158e-05	0.000503608	-0.000473848	Promoter (<=1kb)	chr12	3572391	3646786	74396	+	13528	uc007mwu.2	0	ENSMUSG00000071454	Dtnb	dystrobrevin, beta
1081	chr12	3572661	3572722	62	*	8.62005e-12	0.384001	0.00113421	0.382867	Promoter (<=1kb)	chr12	3572391	3646786	74396	+	13528	uc007mwu.2	331	ENSMUSG00000071454	Dtnb	dystrobrevin, beta
1082	chr12	3572741	3572744	4	*	5.86525e-05	3.12694e-05	0.00108208	-0.00105081	Promoter (<=1kb)	chr12	3573041	3781398	208358	+	13528	uc007mwy.2	-300	ENSMUSG00000071454	Dtnb	dystrobrevin, beta
1083	chr12	3806464	3806616	153	*	8.45704e-06	0.00515219	0.000115937	0.00504528	Promoter (<=1kb)	chr12	3806523	3867484	60962	+	13435	uc007mxa.2	0	ENSMUSG00000020661	Dnmt3a	DNA methyltransferase 3A
1084	chr12	3806899	3807023	125	*	1.24879e-06	4.12968e-05	0.00319974	-0.00316254	Promoter (<=1kb)	chr12	3806980	3914443	107464	+	13435	uc007mxb.1	0	ENSMUSG00000020661	Dnmt3a	DNA methyltransferase 3A
1085	chr12	3807184	3807284	101	*	0.000170254	0.000586898	3.15367e-05	0.000555362	Promoter (<=1kb)	chr12	3807160	3914443	107284	+	13435	uc007mxc.1	124	ENSMUSG00000020661	Dnmt3a	DNA methyltransferase 3A
1086	chr12	3807762	3807823	62	*	0.000115923	3.05614e-05	0.000727335	-0.000696793	Promoter (<=1kb)	chr12	3807160	3914443	107284	+	13435	uc007mxc.1	663	ENSMUSG00000020661	Dnmt3a	DNA methyltransferase 3A
1087	chr12	3807894	3807894	1	*	0.000631983	0.00295142	0.00028985	0.00266157	Promoter (<=1kb)	chr12	3807160	3914443	107284	+	13435	uc007mxc.1	734	ENSMUSG00000020661	Dnmt3a	DNA methyltransferase 3A
1088	chr12	4476691	4476700	10	*	9.55408e-06	0.308537	0.00378812	0.304748	Promoter (<=1kb)	chr12	4247362	4477182	229821	-	17977	uc007mxs.2	482	ENSMUSG00000020647	Ncoa1	nuclear receptor coactivator 1
1089	chr12	4476905	4477013	109	*	2.89708e-06	0.00361124	3.86814e-05	0.00357805	Promoter (<=1kb)	chr12	4247362	4477182	229821	-	17977	uc007mxs.2	169	ENSMUSG00000020647	Ncoa1	nuclear receptor coactivator 1
1090	chr12	4477128	4477134	7	*	1.08086e-05	5.48318e-05	0.00290225	-0.00284742	Promoter (<=1kb)	chr12	4247362	4477182	229821	-	17977	uc007mxs.2	48	ENSMUSG00000020647	Ncoa1	nuclear receptor coactivator 1
1091	chr12	4592969	4593077	109	*	0.000720334	0.00231545	0.03443	-0.0320929	Promoter (<=1kb)	chr12	4593008	4641139	48132	+	20403	uc007mxv.2	0	ENSMUSG00000020640	Itsn2	intersectin 2
1092	chr12	8499594	8499687	94	*	5.73543e-11	3.85154e-05	0.00494908	-0.00490997	Promoter (<=1kb)	chr12	8497759	8499985	2227	-	11852	uc007mzp.1	298	ENSMUSG00000054364	Rhob	ras homolog gene family, member B
1093	chr12	8640874	8640909	36	*	1.0114e-11	4.82499e-05	0.010984	-0.0109358	Distal Intergenic	chr12	8674134	8752583	78450	+	80913	uc007mzu.2	-33260	ENSMUSG00000020594	Pum2	pumilio RNA-binding family member 2
1094	chr12	8674723	8674736	14	*	1.83713e-06	0.338694	0.00592801	0.332766	Promoter (<=1kb)	chr12	8674681	8752583	77903	+	80913	uc007mzz.2	55	ENSMUSG00000020594	Pum2	pumilio RNA-binding family member 2
1095	chr12	9574271	9574271	1	*	2.08291e-11	0.0187117	3.66041e-05	0.0186751	Promoter (<=1kb)	chr12	9574442	9581500	7059	+	23967	uc007nao.2	-171	ENSMUSG00000048387	Osr1	odd-skipped related 1 (Drosophila)
1096	chr12	10390831	10391011	181	*	7.19658e-10	0.383967	0.00118895	0.382158	Promoter (<=1kb)	chr12	10390780	10395562	4783	+	105014	uc007nar.2	231	ENSMUSG00000020621	Rdh14	retinol dehydrogenase 14 (all-trans and 9-cis)
1097	chr12	16800755	16800790	36	*	1.05194e-11	0.382803	0.00095401	0.381849	Promoter (<=1kb)	chr12	16670615	16800886	130272	-	268527	uc029rrb.1	96	ENSMUSG00000036523	Greb1	gene regulated by estrogen in breast cancer protein
1098	chr12	17348355	17348460	106	*	7.02044e-05	0.0023517	5.44865e-05	0.00229721	Promoter (<=1kb)	chr12	17348493	17430095	81603	+	217431	uc007ncu.1	-138	ENSMUSG00000061458	Nol10	nucleolar protein 10
1099	chr12	17544804	17544804	1	*	0.00432824	0.000277723	0.00550218	-0.00522446	Promoter (<=1kb)	chr12	17544873	17551502	6630	+	18263	uc007ncv.1	-69	ENSMUSG00000011179	Odc1	ornithine decarboxylase, structural 1
1100	chr12	17544883	17544883	1	*	1.70331e-08	0.377895	0.00272513	0.37517	Promoter (<=1kb)	chr12	17544873	17551502	6630	+	18263	uc007ncv.1	10	ENSMUSG00000011179	Odc1	ornithine decarboxylase, structural 1
1101	chr12	17544889	17544889	1	*	2.26129e-05	4.13373e-05	0.00281533	-0.00277399	Promoter (<=1kb)	chr12	17544873	17551502	6630	+	18263	uc007ncv.1	16	ENSMUSG00000011179	Odc1	ornithine decarboxylase, structural 1
1102	chr12	17544893	17544895	3	*	4.13057e-09	0.381501	0.0021763	0.379324	Promoter (<=1kb)	chr12	17544873	17551502	6630	+	18263	uc007ncv.1	22	ENSMUSG00000011179	Odc1	ornithine decarboxylase, structural 1
1103	chr12	17544925	17544952	28	*	2.46724e-05	3.15769e-05	0.00161321	-0.00158164	Promoter (<=1kb)	chr12	17544873	17551502	6630	+	18263	uc007ncv.1	79	ENSMUSG00000011179	Odc1	ornithine decarboxylase, structural 1
1104	chr12	17545300	17545395	96	*	0.000782594	0.0118167	0.00128755	0.0104286	Promoter (<=1kb)	chr12	17544873	17551502	6630	+	18263	uc007ncv.1	522	ENSMUSG00000011179	Odc1	ornithine decarboxylase, structural 1
1105	chr12	17690756	17690764	9	*	0.00355672	0.0151592	0.00069156	0.0144677	Promoter (<=1kb)	chr12	17690814	17786548	95735	+	53602	uc007ncw.1	-58	ENSMUSG00000071379	Hpcal1	hippocalcin-like 1
1106	chr12	17691274	17691397	124	*	4.88828e-11	0.383991	0.0014412	0.382407	Promoter (<=1kb)	chr12	17690814	17786548	95735	+	53602	uc007ncw.1	583	ENSMUSG00000071379	Hpcal1	hippocalcin-like 1
1107	chr12	20815371	20815412	42	*	0.00018693	0.231122	0.38195	-0.148253	Promoter (<=1kb)	chr12	20804392	20815779	11388	-	69513	uc007nde.2	367	ENSMUSG00000099759	1700030C10Rik	RIKEN cDNA 1700030C10 gene
1108	chr12	20921454	20921497	44	*	8.81904e-06	3.47934e-05	0.00238971	-0.00235567	Intron (uc029rrg.2/uc029rrg.2, intron 3 of 3)	chr12	20804392	20815779	11388	-	69513	uc007nde.2	-105675	ENSMUSG00000099759	1700030C10Rik	RIKEN cDNA 1700030C10 gene
1109	chr12	21111524	21111549	26	*	2.24271e-08	0.00267154	3.6557e-05	0.00263498	Promoter (<=1kb)	chr12	21111756	21270171	158416	+	211914	uc007ndi.1	-232	ENSMUSG00000052632	Asap2	ArfGAP with SH3 domain, ankyrin repeat and PH domain 2
1110	chr12	21286258	21286280	23	*	0.000180109	0.000435397	3.1008e-05	0.000404389	Promoter (<=1kb)	chr12	21269806	21286237	16432	-	16413	uc007ndm.1	-21	ENSMUSG00000062352	Itgb1bp1	integrin beta 1 binding protein 1
1111	chr12	21316551	21316600	50	*	3.18421e-08	0.00805122	8.91225e-05	0.0079621	Promoter (<=1kb)	chr12	21316392	21321358	4967	+	67732	uc007nds.1	208	ENSMUSG00000062054	Iah1	isoamyl acetate-hydrolyzing esterase 1 homolog (S. cerevisiae)
1112	chr12	24252339	24252341	3	*	0.0011922	0.179643	0.0135725	0.16607	Distal Intergenic	chr12	24043202	24097269	54068	-	66808	uc007neh.1	-155070	ENSMUSG00000073158	9030624G23Rik	RIKEN cDNA 9030624G23 gene
1113	chr12	24498583	24498630	48	*	3.25385e-05	3.18911e-05	0.000925356	-0.000893465	Promoter (<=1kb)	chr12	24498581	24509746	11166	+	21340	uc007nei.2	49	ENSMUSG00000059669	Taf1b	TATA box binding protein (Tbp)-associated factor, RNA polymerase I, B
1114	chr12	24571958	24571959	2	*	0.00393026	0.00221499	0.064639	-0.062424	Promoter (<=1kb)	chr12	24572287	24617391	45105	+	195733	uc007nem.2	-329	ENSMUSG00000020656	Grhl1	grainyhead-like 1 (Drosophila)
1115	chr12	24572057	24572131	75	*	1.34529e-06	0.00121088	3.19714e-05	0.00117874	Promoter (<=1kb)	chr12	24572287	24617391	45105	+	195733	uc007nem.2	-230	ENSMUSG00000020656	Grhl1	grainyhead-like 1 (Drosophila)
1116	chr12	24572296	24572325	30	*	3.66184e-07	0.00221334	3.3349e-05	0.00217999	Promoter (<=1kb)	chr12	24572287	24617391	45105	+	195733	uc007nem.2	38	ENSMUSG00000020656	Grhl1	grainyhead-like 1 (Drosophila)
1117	chr12	24572612	24572612	1	*	0.000223738	0.03608	0.00104646	0.0350335	Promoter (<=1kb)	chr12	24572287	24617391	45105	+	195733	uc007nem.2	325	ENSMUSG00000020656	Grhl1	grainyhead-like 1 (Drosophila)
1118	chr12	24651132	24651253	122	*	2.41518e-07	3.07938e-05	0.00199721	-0.0019665	Promoter (<=1kb)	chr12	24651371	24662782	11412	+	194655	uc007neo.2	-239	ENSMUSG00000020653	Klf11	Kruppel-like factor 11
1119	chr12	24651747	24651762	16	*	4.65939e-08	0.383271	0.00374075	0.37953	Promoter (<=1kb)	chr12	24651371	24662782	11412	+	194655	uc007neo.2	391	ENSMUSG00000020653	Klf11	Kruppel-like factor 11
1120	chr12	24707932	24708035	104	*	2.08082e-05	0.0046839	7.90011e-05	0.00459943	Promoter (<=1kb)	chr12	24708254	24714146	5893	+	20135	uc007ner.2	-322	ENSMUSG00000020649	Rrm2	ribonucleotide reductase M2
1121	chr12	24708330	24708339	10	*	0.00135208	0.0542687	0.00166259	0.0526061	Promoter (<=1kb)	chr12	24708254	24714146	5893	+	20135	uc007ner.2	85	ENSMUSG00000020649	Rrm2	ribonucleotide reductase M2
1122	chr12	24831430	24831514	85	*	0.000373417	0.00192464	6.53436e-05	0.00185929	Promoter (<=1kb)	chr12	24831599	24946686	115088	+	67216	uc007net.1	-169	ENSMUSG00000020646	Mboat2	membrane bound O-acyltransferase domain containing 2
1123	chr12	28635376	28635424	49	*	2.69226e-08	0.00334251	3.91654e-05	0.00330334	Promoter (<=1kb)	chr12	28630847	28635953	5107	-	20115	uc007nfs.2	529	ENSMUSG00000061477	Rps7	ribosomal protein S7
1124	chr12	28635479	28635569	91	*	0.000181334	3.57345e-05	0.000897192	-0.00086262	Promoter (<=1kb)	chr12	28630847	28635953	5107	-	20115	uc007nfs.2	384	ENSMUSG00000061477	Rps7	ribosomal protein S7
1125	chr12	28635989	28635990	2	*	0.00573258	0.000383482	4.8061e-05	0.000335421	Promoter (<=1kb)	chr12	28630847	28635953	5107	-	20115	uc007nfs.2	-36	ENSMUSG00000061477	Rps7	ribosomal protein S7
1126	chr12	32378796	32378872	77	*	1.43029e-05	0.00313356	4.40606e-05	0.00308923	Promoter (<=1kb)	chr12	32378789	32382943	4155	+	72123	uc007nie.2	83	ENSMUSG00000090946	Ccdc71l	coiled-coil domain containing 71 like
1127	chr12	32953966	32954026	61	*	3.43283e-07	0.00290375	5.27853e-05	0.00285097	Promoter (<=1kb)	chr12	32953945	32979502	25558	+	19027	uc007nih.2	81	ENSMUSG00000020570	Sypl	synaptophysin-like protein
1128	chr12	32954518	32954550	33	*	1.10088e-12	0.384385	0.000656089	0.383729	Promoter (<=1kb)	chr12	32954186	32979502	25317	+	19027	uc007nii.2	364	ENSMUSG00000020570	Sypl	synaptophysin-like protein
1129	chr12	35046975	35047049	75	*	8.0375e-05	3.19435e-05	0.00151851	-0.00148656	Promoter (<=1kb)	chr12	35047189	35091966	44778	+	217463	uc007njf.2	-214	ENSMUSG00000020590	Snx13	sorting nexin 13
1130	chr12	36042121	36042271	151	*	2.28652e-06	0.00297901	5.50081e-05	0.00292309	Promoter (<=1kb)	chr12	36014555	36042478	27924	-	66109	uc007njn.1	207	ENSMUSG00000020577	Tspan13	tetraspanin 13
1131	chr12	36156350	36156410	61	*	4.28004e-06	0.00183299	3.34673e-05	0.00179952	Promoter (<=1kb)	chr12	36091835	36156825	64991	-	66912	uc007njp.2	415	ENSMUSG00000020547	Bzw2	basic leucine zipper and W2 domains 2
1132	chr12	36157417	36157447	31	*	7.55451e-05	0.0024706	5.98833e-05	0.00241056	Promoter (<=1kb)	chr12	36157124	36188215	31092	+	217473	uc007njs.2	323	ENSMUSG00000036188	Ankmy2	ankyrin repeat and MYND domain containing 2
1133	chr12	40037448	40037565	118	*	8.54512e-11	4.01439e-05	0.0140185	-0.0139749	Promoter (<=1kb)	chr12	40005447	40037376	31930	-	11861	uc007nkr.1	-72	ENSMUSG00000047446	Arl4a	ADP-ribosylation factor-like 4A
1134	chr12	40445685	40445720	36	*	4.11776e-08	0.00270143	3.98237e-05	0.00266161	Promoter (<=1kb)	chr12	40315046	40445790	130745	-	246196	uc007nla.2	70	ENSMUSG00000055917	Zfp277	zinc finger protein 277
1135	chr12	40445964	40446102	139	*	8.11554e-05	0.000504142	3.15914e-05	0.000472815	Promoter (<=1kb)	chr12	40446053	40637690	191638	+	238130	uc007nlc.1	0	ENSMUSG00000035954	Dock4	dedicator of cytokinesis 4
1136	chr12	40446285	40446371	87	*	6.64633e-05	3.27783e-05	0.000958763	-0.000926423	Promoter (<=1kb)	chr12	40446053	40637690	191638	+	238130	uc007nlc.1	318	ENSMUSG00000035954	Dock4	dedicator of cytokinesis 4
1137	chr12	40446495	40446579	85	*	4.1285e-10	0.00230513	3.39391e-05	0.00226909	Promoter (<=1kb)	chr12	40446053	40637690	191638	+	238130	uc007nlc.1	526	ENSMUSG00000035954	Dock4	dedicator of cytokinesis 4
1138	chr12	50781051	50781087	37	*	0.000202796	0.856494	0.949187	-0.0917355	Distal Intergenic	chr12	50341232	50649223	307992	-	18760	uc007nmj.1	-131828	ENSMUSG00000002688	Prkd1	protein kinase D1
1139	chr12	51691430	51691507	78	*	7.86997e-11	0.383279	0.00162479	0.38166	Promoter (<=1kb)	chr12	51608541	51691914	83374	-	94186	uc007nmt.2	407	ENSMUSG00000020954	Strn3	striatin, calmodulin binding protein 3
1140	chr12	52604179	52604212	34	*	5.80705e-05	0.376543	0.0156584	0.360699	Promoter (1-2kb)	chr12	52599984	52602322	2339	-	73278	uc007nnl.1	-1857	ENSMUSG00000100315	1700031P21Rik	RIKEN cDNA 1700031P21 gene
1141	chr12	54795137	54795161	25	*	0.000292785	0.334897	0.0164749	0.318423	Promoter (<=1kb)	chr12	54746357	54795662	49306	-	72183	uc007nnv.1	501	ENSMUSG00000005656	Snx6	sorting nexin 6
1142	chr12	54985006	54985060	55	*	1.02088e-07	0.00251107	3.10166e-05	0.00247984	Promoter (1-2kb)	chr12	54892989	54986336	93348	-	217578	uc007nnz.2	1276	ENSMUSG00000035021	Baz1a	bromodomain adjacent to zinc finger domain 1A
1143	chr12	54985265	54985303	39	*	1.29515e-12	0.385385	0.000723972	0.384661	Promoter (1-2kb)	chr12	54892989	54986336	93348	-	217578	uc007nnz.2	1033	ENSMUSG00000035021	Baz1a	bromodomain adjacent to zinc finger domain 1A
1144	chr12	54986143	54986216	74	*	4.76409e-07	0.00324253	3.2351e-05	0.00321022	Promoter (<=1kb)	chr12	54892989	54986336	93348	-	217578	uc007nnz.2	120	ENSMUSG00000035021	Baz1a	bromodomain adjacent to zinc finger domain 1A
1145	chr12	55080652	55080699	48	*	1.88458e-06	0.00538002	4.89403e-05	0.00533262	Promoter (<=1kb)	chr12	55080496	55115367	34872	+	24067	uc007nof.1	203	ENSMUSG00000073079	Srp54a	signal recognition particle 54A
1146	chr12	55491882	55491904	23	*	4.34476e-11	0.384143	0.00189352	0.38225	Promoter (<=1kb)	chr12	55489409	55492647	3239	-	18035	uc007nor.2	743	ENSMUSG00000021025	Nfkbia	nuclear factor of kappa light polypeptide gene enhancer in B cells inhibitor, alpha
1147	chr12	59061296	59061453	158	*	6.09604e-07	6.53706e-05	0.00818792	-0.00811354	Promoter (<=1kb)	chr12	59043092	59061461	18370	-	78232	uc007npy.1	8	ENSMUSG00000020993	Trappc6b	trafficking protein particle complex 6B
1148	chr12	59219176	59219184	9	*	0.00013428	0.00176574	5.94848e-05	0.00170625	Promoter (<=1kb)	chr12	59200655	59219483	18829	-	70611	uc007nqk.2	299	ENSMUSG00000035329	Fbxo33	F-box protein 33
1149	chr12	65075529	65075649	121	*	3.37526e-14	0.38458	0.000459189	0.38413	Promoter (<=1kb)	chr12	65075606	65094084	18479	+	104806	uc007nrc.1	0	ENSMUSG00000055884	Fancm	Fanconi anemia, complementation group M
1150	chr12	65075848	65075905	58	*	3.93212e-08	5.91214e-05	0.0134267	-0.0133676	Promoter (<=1kb)	chr12	65075606	65094084	18479	+	104806	uc007nrc.1	299	ENSMUSG00000055884	Fancm	Fanconi anemia, complementation group M
1151	chr12	65075968	65076057	90	*	6.22622e-09	0.00501542	3.91003e-05	0.00497632	Promoter (<=1kb)	chr12	65075606	65094084	18479	+	104806	uc007nrc.1	451	ENSMUSG00000055884	Fancm	Fanconi anemia, complementation group M
1152	chr12	69159252	69159298	47	*	1.13268e-06	0.431722	0.00492162	0.4268	Promoter (<=1kb)	chr12	69157722	69159186	1465	-	20090	uc007nrp.2	-66	ENSMUSG00000034892	Rps29	ribosomal protein S29
1153	chr12	69168495	69168538	44	*	9.02617e-10	0.382991	0.00171963	0.381272	Promoter (<=1kb)	chr12	69168814	69179010	10197	+	69706	uc007nrq.1	-319	ENSMUSG00000034883	Lrr1	leucine rich repeat protein 1
1154	chr12	69168803	69168837	35	*	1.15632e-06	0.00127262	3.25501e-05	0.00124007	Promoter (<=1kb)	chr12	69168814	69179010	10197	+	69706	uc007nrq.1	0	ENSMUSG00000034883	Lrr1	leucine rich repeat protein 1
1155	chr12	69197071	69197189	119	*	3.08565e-10	0.00144311	3.14211e-05	0.00141169	Promoter (<=1kb)	chr12	69197211	69199868	2658	+	414085	uc007nru.1	-140	ENSMUSG00000097061	9330151L19Rik	RIKEN cDNA 9330151L19 gene
1156	chr12	69296736	69296775	40	*	0.000108206	0.000936553	3.71335e-05	0.000899419	Promoter (<=1kb)	chr12	69296681	69301117	4437	+	69554	uc007nry.2	94	ENSMUSG00000020978	Klhdc2	kelch domain containing 2
1157	chr12	69296805	69296959	155	*	0.00020247	2.99199e-05	0.000584106	-0.000554171	Promoter (<=1kb)	chr12	69296681	69301117	4437	+	69554	uc007nry.2	278	ENSMUSG00000020978	Klhdc2	kelch domain containing 2
1158	chr12	69297036	69297036	1	*	0.00571397	0.00311891	0.000229019	0.0028899	Promoter (<=1kb)	chr12	69296681	69301117	4437	+	69554	uc007nry.2	355	ENSMUSG00000020978	Klhdc2	kelch domain containing 2
1159	chr12	69357090	69357131	42	*	4.18409e-06	0.00271276	5.11827e-05	0.00265935	Promoter (<=1kb)	chr12	69311543	69357176	45634	-	66244	uc007nse.2	45	ENSMUSG00000020982	Nemf	nuclear export mediator factor
1160	chr12	69364279	69364367	89	*	0.000105518	0.376289	0.0179861	0.359374	Distal Intergenic	chr12	69311543	69357176	45634	-	66244	uc007nse.2	-7103	ENSMUSG00000020982	Nemf	nuclear export mediator factor
1161	chr12	69371830	69371922	93	*	2.06717e-05	3.21866e-05	0.00144742	-0.00141551	Promoter (<=1kb)	chr12	69372150	69375980	3831	+	11845	uc007nsj.1	-320	ENSMUSG00000044147	Arf6	ADP-ribosylation factor 6
1162	chr12	69372365	69372461	97	*	0.00258107	2.95986e-05	0.000205392	-0.000175794	Promoter (<=1kb)	chr12	69372150	69375980	3831	+	11845	uc007nsj.1	311	ENSMUSG00000044147	Arf6	ADP-ribosylation factor 6
1163	chr12	69372666	69372677	12	*	1.35237e-07	0.00542855	4.27735e-05	0.00538577	Promoter (<=1kb)	chr12	69372150	69375980	3831	+	11845	uc007nsj.1	527	ENSMUSG00000044147	Arf6	ADP-ribosylation factor 6
1164	chr12	69681294	69681326	33	*	0.000185701	0.00230494	6.46243e-05	0.00224031	Promoter (<=1kb)	chr12	69583761	69681852	98092	-	20663	uc007nso.2	526	ENSMUSG00000034801	Sos2	son of sevenless homolog 2 (Drosophila)
1165	chr12	69681520	69681608	89	*	8.37857e-05	0.000670038	3.17182e-05	0.000638697	Promoter (<=1kb)	chr12	69583761	69681852	98092	-	20663	uc007nso.2	244	ENSMUSG00000034801	Sos2	son of sevenless homolog 2 (Drosophila)
1166	chr12	69893180	69893276	97	*	6.77496e-06	0.0291101	0.00117713	0.0279359	Promoter (<=1kb)	chr12	69803757	69893163	89407	-	399510	uc007nsu.1	-17	ENSMUSG00000034761	Map4k5	mitogen-activated protein kinase kinase kinase kinase 5
1167	chr12	70111246	70111464	219	*	3.40095e-05	3.82994e-05	0.00150141	-0.00146709	Promoter (<=1kb)	chr12	70018740	70112035	93296	-	18080	uc007ntg.2	571	ENSMUSG00000021068	Nin	ninein
1168	chr12	70111636	70111653	18	*	0.000223173	0.00076326	0.0287338	-0.0279705	Promoter (<=1kb)	chr12	70018740	70112035	93296	-	18080	uc007ntg.2	382	ENSMUSG00000021068	Nin	ninein
1169	chr12	70111910	70112039	130	*	6.03961e-05	3.04839e-05	0.00095123	-0.000920836	Promoter (<=1kb)	chr12	70018740	70112035	93296	-	18080	uc007ntg.2	0	ENSMUSG00000021068	Nin	ninein
1170	chr12	70347011	70347073	63	*	3.38807e-13	0.0300226	7.62824e-05	0.0299463	Promoter (<=1kb)	chr12	70244535	70347614	103080	-	94090	uc007nto.3	541	ENSMUSG00000021071	Trim9	tripartite motif-containing 9
1171	chr12	70825518	70825719	202	*	0.000104389	3.47235e-05	0.00304236	-0.003009	Promoter (<=1kb)	chr12	70825689	70895649	69961	+	319710	uc007ntw.1	0	ENSMUSG00000048285	Frmd6	FERM domain containing 6
1172	chr12	70938048	70938072	25	*	1.23918e-05	0.00237973	4.53994e-05	0.00233433	Promoter (<=1kb)	chr12	70937857	70964717	26861	+	56444	uc007nty.2	215	ENSMUSG00000021076	Actr10	ARP10 actin-related protein 10
1173	chr12	70968197	70968274	78	*	2.071e-05	0.00623406	0.109885	-0.103458	Distal Intergenic	chr12	70974623	70994923	20301	+	19167	uc007ntz.2	-6426	ENSMUSG00000060073	Psma3	proteasome (prosome, macropain) subunit, alpha type 3
1174	chr12	71016472	71016528	57	*	0.00010086	3.11809e-05	0.000832293	-0.00080074	Promoter (<=1kb)	chr12	71016708	71047360	30653	+	238247	uc007nue.1	-236	ENSMUSG00000048118	Arid4a	AT rich interactive domain 4A (RBP1-like)
1175	chr12	71016741	71016911	171	*	1.80667e-07	3.11015e-05	0.00208498	-0.00205389	Promoter (<=1kb)	chr12	71016708	71047360	30653	+	238247	uc007nue.1	203	ENSMUSG00000048118	Arid4a	AT rich interactive domain 4A (RBP1-like)
1176	chr12	71016980	71017008	29	*	1.04032e-09	0.383336	0.00182315	0.381513	Promoter (<=1kb)	chr12	71016708	71047360	30653	+	238247	uc007nue.1	300	ENSMUSG00000048118	Arid4a	AT rich interactive domain 4A (RBP1-like)
1177	chr12	71017032	71017108	77	*	2.50951e-06	0.000296256	0.0229733	-0.0226771	Promoter (<=1kb)	chr12	71016708	71047360	30653	+	238247	uc007nue.1	400	ENSMUSG00000048118	Arid4a	AT rich interactive domain 4A (RBP1-like)
1178	chr12	71137215	71137217	3	*	5.51874e-08	3.0061e-05	0.00275753	-0.00272746	Promoter (<=1kb)	chr12	71136848	71243303	106456	+	76967	uc007nun.2	369	ENSMUSG00000034601	2700049A03Rik	RIKEN cDNA 2700049A03 gene
1179	chr12	71137225	71137265	41	*	7.71389e-08	0.384062	0.00475393	0.379308	Promoter (<=1kb)	chr12	71136848	71243303	106456	+	76967	uc007nun.2	417	ENSMUSG00000034601	2700049A03Rik	RIKEN cDNA 2700049A03 gene
1180	chr12	71309967	71310072	106	*	1.50288e-05	4.32283e-05	0.00351331	-0.00347008	Promoter (<=1kb)	chr12	71309884	71320107	10224	+	59036	uc007nup.2	188	ENSMUSG00000044548	Dact1	dapper homolog 1, antagonist of beta-catenin (xenopus)
1181	chr12	71310321	71310321	1	*	0.000128448	0.00191036	0.141158	-0.139248	Promoter (<=1kb)	chr12	71309884	71320107	10224	+	59036	uc007nup.2	437	ENSMUSG00000044548	Dact1	dapper homolog 1, antagonist of beta-catenin (xenopus)
1182	chr12	72408273	72408273	1	*	0.000930087	3.42948e-05	0.000478119	-0.000443824	Promoter (<=1kb)	chr12	72211749	72409054	197306	-	104001	uc007nvk.2	781	ENSMUSG00000021087	Rtn1	reticulon 1
1183	chr12	72408595	72408688	94	*	9.76167e-43	3.49045e-05	0.0119661	-0.0119312	Promoter (<=1kb)	chr12	72211749	72409054	197306	-	104001	uc007nvk.2	366	ENSMUSG00000021087	Rtn1	reticulon 1
1184	chr12	72664790	72664863	74	*	8.32887e-06	0.00187457	3.73742e-05	0.0018372	Promoter (<=1kb)	chr12	72650353	72664828	14476	-	66375	uc007nvs.2	0	ENSMUSG00000021094	Dhrs7	dehydrogenase/reductase (SDR family) member 7
1185	chr12	73046639	73046683	45	*	5.54818e-08	3.40501e-05	0.00443095	-0.0043969	Promoter (<=1kb)	chr12	73041827	73046712	4886	-	20471	uc007nwa.2	29	ENSMUSG00000051367	Six1	sine oculis-related homeobox 1
1186	chr12	73046915	73046941	27	*	2.58651e-07	0.367698	0.00619359	0.361504	Promoter (<=1kb)	chr12	73041827	73046712	4886	-	20471	uc007nwa.2	-203	ENSMUSG00000051367	Six1	sine oculis-related homeobox 1
1187	chr12	73123668	73123723	56	*	5.44667e-07	5.72814e-05	0.00692569	-0.00686841	Promoter (<=1kb)	chr12	73123717	73170416	46700	+	17420	uc007nwd.1	0	ENSMUSG00000021103	Mnat1	menage a trois 1
1188	chr12	73907525	73907573	49	*	2.22205e-05	0.00154788	3.85257e-05	0.00150935	Promoter (<=1kb)	chr12	73907867	73933076	25210	+	15251	uc007nwp.2	-342	ENSMUSG00000021109	Hif1a	hypoxia inducible factor 1, alpha subunit
1189	chr12	73907799	73907893	95	*	6.60807e-06	3.09002e-05	0.00198312	-0.00195222	Promoter (<=1kb)	chr12	73907867	73933076	25210	+	15251	uc007nwp.2	0	ENSMUSG00000021109	Hif1a	hypoxia inducible factor 1, alpha subunit
1190	chr12	75595836	75595928	93	*	2.25821e-07	0.00384703	3.95474e-05	0.00380748	Promoter (<=1kb)	chr12	75450881	75596200	145320	-	26932	uc007nxe.1	272	ENSMUSG00000021051	Ppp2r5e	protein phosphatase 2, regulatory subunit B', epsilon
1191	chr12	76369142	76369260	119	*	9.84451e-07	0.00138049	3.1819e-05	0.00134843	Promoter (<=1kb)	chr12	76348944	76368999	20056	-	109929	uc007nyb.1	-143	ENSMUSG00000056459	Zbtb25	zinc finger and BTB domain containing 25
1192	chr12	76369725	76369748	24	*	0.00189055	0.135859	0.00562206	0.128364	Promoter (<=1kb)	chr12	76348900	76369560	20661	-	109929	uc011ynz.1	-165	ENSMUSG00000056459	Zbtb25	zinc finger and BTB domain containing 25
1193	chr12	76370287	76370400	114	*	4.67683e-09	0.382374	0.00242257	0.379798	Promoter (<=1kb)	chr12	76370266	76388747	18482	+	268564	uc007nyd.2	134	ENSMUSG00000033454	Zbtb1	zinc finger and BTB domain containing 1
1194	chr12	76370600	76370628	29	*	4.0433e-11	3.31454e-05	0.00304246	-0.00300931	Promoter (<=1kb)	chr12	76370266	76388747	18482	+	268564	uc007nyd.2	362	ENSMUSG00000033454	Zbtb1	zinc finger and BTB domain containing 1
1195	chr12	76370810	76370867	58	*	9.18303e-07	0.00451255	7.36634e-05	0.00443888	Promoter (<=1kb)	chr12	76370266	76388747	18482	+	268564	uc007nyd.2	601	ENSMUSG00000033454	Zbtb1	zinc finger and BTB domain containing 1
1196	chr12	76961534	76961534	1	*	0.00533885	0.000719949	0.0106324	-0.00991246	Promoter (<=1kb)	chr12	76937269	76962248	24980	-	17187	uc007nyw.2	714	ENSMUSG00000059436	Max	Max protein
1197	chr12	76961771	76961947	177	*	1.14263e-11	0.382188	0.000950451	0.381238	Promoter (<=1kb)	chr12	76937269	76962248	24980	-	17187	uc007nyw.2	301	ENSMUSG00000059436	Max	Max protein
1198	chr12	79089611	79089646	36	*	3.57466e-05	0.0122556	0.000199406	0.0120562	Promoter (<=1kb)	chr12	79080670	79089670	9001	-	110417	uc007nzs.2	24	ENSMUSG00000021120	Pigh	phosphatidylinositol glycan anchor biosynthesis, class H
1199	chr12	80260552	80260596	45	*	3.08091e-14	0.38397	0.000415586	0.383554	Promoter (<=1kb)	chr12	80167542	80260371	92830	-	109711	uc007oap.2	-181	ENSMUSG00000015143	Actn1	actinin, alpha 1
1200	chr12	80435612	80435701	90	*	6.39935e-06	0.0106796	0.000116457	0.0105757	Promoter (<=1kb)	chr12	80335847	80436601	100755	-	320808	uc007oar.2	900	ENSMUSG00000049106	Dcaf5	DDB1 and CUL4 associated factor 5
1201	chr12	80790572	80790672	101	*	6.40876e-07	0.00298457	3.73184e-05	0.00294397	Promoter (<=1kb)	chr12	80790532	80880833	90302	+	217684	uc007obi.2	140	ENSMUSG00000021133	Susd6	sushi domain containing 6
1202	chr12	80790876	80790932	57	*	7.22872e-11	0.383072	0.00107045	0.382002	Promoter (<=1kb)	chr12	80790532	80880833	90302	+	217684	uc007obi.2	400	ENSMUSG00000021133	Susd6	sushi domain containing 6
1203	chr12	80790936	80790936	1	*	0.000407344	3.14121e-05	0.000711398	-0.000679986	Promoter (<=1kb)	chr12	80790532	80880833	90302	+	217684	uc007obi.2	404	ENSMUSG00000021133	Susd6	sushi domain containing 6
1204	chr12	80945894	80945935	42	*	1.96302e-09	0.37556	0.00179083	0.373769	Promoter (<=1kb)	chr12	80945504	80946848	1345	+	20384	uc007obm.1	431	ENSMUSG00000021134	Srsf5	serine/arginine-rich splicing factor 5
1205	chr12	80946249	80946328	80	*	8.90035e-08	0.00356535	4.47855e-05	0.00352056	Promoter (<=1kb)	chr12	80945504	80946848	1345	+	20384	uc007obm.1	824	ENSMUSG00000021134	Srsf5	serine/arginine-rich splicing factor 5
1206	chr12	81314965	81314966	2	*	0.000561431	0.88418	0.91262	-0.0284396	Exon (uc007obv.2/110893, exon 2 of 8)	chr12	81197915	81333180	135266	-	110893	uc007obv.2	18214	ENSMUSG00000079055	Slc8a3	solute carrier family 8 (sodium/calcium exchanger), member 3
1207	chr12	81918978	81918990	13	*	0.000255115	0.984903	0.835621	0.149281	Promoter (1-2kb)	chr12	81917665	81952941	35277	+	54604	uc011yol.1	1325	ENSMUSG00000021140	Pcnx	pecanex homolog (Drosophila)
1208	chr12	83921541	83921552	12	*	0.000102423	0.00198275	5.86038e-05	0.00192415	Promoter (<=1kb)	chr12	83794034	83921934	127901	-	18222	uc007odx.2	382	ENSMUSG00000021224	Numb	numb gene homolog (Drosophila)
1209	chr12	83921770	83921842	73	*	1.87458e-11	0.384509	0.00133453	0.383173	Promoter (<=1kb)	chr12	83794034	83921934	127901	-	18222	uc007odx.2	92	ENSMUSG00000021224	Numb	numb gene homolog (Drosophila)
1210	chr12	83950569	83950595	27	*	2.92155e-05	0.00476627	7.57794e-05	0.00469049	Promoter (<=1kb)	chr12	83950608	83952953	2346	+	71952	uc007odz.2	-39	ENSMUSG00000046791	2410016O06Rik	RIKEN cDNA 2410016O06 gene
1211	chr12	83950807	83950943	137	*	4.1779e-08	0.00754353	5.83316e-05	0.00748096	Promoter (<=1kb)	chr12	83950608	83952953	2346	+	71952	uc007odz.2	335	ENSMUSG00000046791	2410016O06Rik	RIKEN cDNA 2410016O06 gene
1212	chr12	84163924	84163924	1	*	6.2487e-07	0.797067	0.676601	0.120466	Intron (uc011you.2/238317, intron 10 of 12)	chr12	84146131	84148489	2359	-	70481	uc007oel.1	-15435	ENSMUSG00000054383	Pnma1	paraneoplastic antigen MA1
1213	chr12	84175741	84175771	31	*	5.55263e-07	0.370772	0.00618552	0.364586	Intron (uc011you.2/238317, intron 12 of 12)	chr12	84149174	84194015	44842	-	238317	uc011you.2	18244	ENSMUSG00000042507	Elmsan1	ELM2 and Myb/SANT-like domain containing 1
1214	chr12	84175778	84175778	1	*	5.82564e-07	6.20401e-05	0.00650339	-0.00644135	Intron (uc011you.2/238317, intron 12 of 12)	chr12	84149174	84194015	44842	-	238317	uc011you.2	18237	ENSMUSG00000042507	Elmsan1	ELM2 and Myb/SANT-like domain containing 1
1215	chr12	84175779	84175783	5	*	2.11053e-07	0.373416	0.00529461	0.368122	Intron (uc011you.2/238317, intron 12 of 12)	chr12	84149174	84194015	44842	-	238317	uc011you.2	18232	ENSMUSG00000042507	Elmsan1	ELM2 and Myb/SANT-like domain containing 1
1216	chr12	84175788	84175789	2	*	7.07844e-07	6.21675e-05	0.00626089	-0.00619872	Intron (uc011you.2/238317, intron 12 of 12)	chr12	84149174	84194015	44842	-	238317	uc011you.2	18226	ENSMUSG00000042507	Elmsan1	ELM2 and Myb/SANT-like domain containing 1
1217	chr12	84175802	84175802	1	*	1.13205e-07	0.374163	0.00472793	0.369435	Intron (uc011you.2/238317, intron 12 of 12)	chr12	84149174	84194015	44842	-	238317	uc011you.2	18213	ENSMUSG00000042507	Elmsan1	ELM2 and Myb/SANT-like domain containing 1
1218	chr12	84192368	84192375	8	*	4.31624e-05	0.347132	0.0114146	0.335718	Promoter (1-2kb)	chr12	84149174	84194015	44842	-	238317	uc011you.2	1640	ENSMUSG00000042507	Elmsan1	ELM2 and Myb/SANT-like domain containing 1
1219	chr12	84193112	84193131	20	*	3.43657e-07	0.384007	0.00639308	0.377613	Promoter (<=1kb)	chr12	84149174	84194015	44842	-	238317	uc011you.2	884	ENSMUSG00000042507	Elmsan1	ELM2 and Myb/SANT-like domain containing 1
1220	chr12	84193299	84193388	90	*	1.98208e-06	0.00131698	3.39179e-05	0.00128362	Promoter (<=1kb)	chr12	84149174	84194015	44842	-	238317	uc011you.2	627	ENSMUSG00000042507	Elmsan1	ELM2 and Myb/SANT-like domain containing 1
1221	chr12	84193968	84194024	57	*	9.88366e-05	3.75455e-05	0.00124178	-0.00120433	Promoter (<=1kb)	chr12	84149174	84194015	44842	-	238317	uc011you.2	0	ENSMUSG00000042507	Elmsan1	ELM2 and Myb/SANT-like domain containing 1
1222	chr12	84316886	84316957	72	*	6.72184e-05	3.63972e-05	0.00129748	-0.00126108	Promoter (<=1kb)	chr12	84316859	84327687	10829	+	52708	uc007oeu.2	98	ENSMUSG00000042472	Zfp410	zinc finger protein 410
1223	chr12	84451203	84451288	86	*	6.66476e-05	0.00177593	5.10221e-05	0.00172476	Promoter (<=1kb)	chr12	84430720	84450950	20231	-	104776	uc007ofk.2	-253	ENSMUSG00000021238	Aldh6a1	aldehyde dehydrogenase family 6, subfamily A1
1224	chr12	84890631	84890631	1	*	0.00105357	0.6293	0.853784	-0.224484	Distal Intergenic	chr12	84783212	84876495	93284	-	16997	uc011ypd.1	-14136	ENSMUSG00000002020	Ltbp2	latent transforming growth factor beta binding protein 2
1225	chr12	85110722	85110724	3	*	1.94707e-12	0.384708	0.00097739	0.38373	Promoter (<=1kb)	chr12	85110833	85134091	23259	+	78920	uc007ogj.2	-111	ENSMUSG00000004789	Dlst	dihydrolipoamide S-succinyltransferase (E2 component of 2-oxo-glutarate complex)
1226	chr12	85110787	85110793	7	*	5.15614e-06	2.98632e-05	0.00185845	-0.00182858	Promoter (<=1kb)	chr12	85110833	85134091	23259	+	78920	uc007ogj.2	-46	ENSMUSG00000004789	Dlst	dihydrolipoamide S-succinyltransferase (E2 component of 2-oxo-glutarate complex)
1227	chr12	85110803	85110896	94	*	7.27118e-09	0.382158	0.00259442	0.380357	Promoter (<=1kb)	chr12	85110833	85134091	23259	+	78920	uc007ogj.2	0	ENSMUSG00000004789	Dlst	dihydrolipoamide S-succinyltransferase (E2 component of 2-oxo-glutarate complex)
1228	chr12	85111166	85111166	1	*	7.18043e-09	0.384877	0.00283848	0.382039	Promoter (<=1kb)	chr12	85110833	85134091	23259	+	78920	uc007ogj.2	333	ENSMUSG00000004789	Dlst	dihydrolipoamide S-succinyltransferase (E2 component of 2-oxo-glutarate complex)
1229	chr12	85140799	85140806	8	*	0.000649354	0.742027	0.560003	0.182025	Promoter (<=1kb)	chr12	85135596	85139989	4394	-	238323	uc007ogm.2	-810	ENSMUSG00000019235	Rps6kl1	ribosomal protein S6 kinase-like 1
1230	chr12	85219367	85219405	39	*	1.21264e-06	3.06881e-05	0.00169675	-0.00166607	Promoter (<=1kb)	chr12	85219513	85226628	7116	+	217715	uc007ogr.1	-146	ENSMUSG00000004788	Eif2b2	eukaryotic translation initiation factor 2B, subunit 2 beta
1231	chr12	85219578	85219606	29	*	2.99981e-06	0.00109146	3.36852e-05	0.00105778	Promoter (<=1kb)	chr12	85219513	85226628	7116	+	217715	uc007ogr.1	93	ENSMUSG00000004788	Eif2b2	eukaryotic translation initiation factor 2B, subunit 2 beta
1232	chr12	85219668	85219728	61	*	1.07918e-06	3.52131e-05	0.0016112	-0.00157577	Promoter (<=1kb)	chr12	85219513	85226628	7116	+	217715	uc007ogr.1	215	ENSMUSG00000004788	Eif2b2	eukaryotic translation initiation factor 2B, subunit 2 beta
1233	chr12	85474453	85474529	77	*	8.95131e-07	0.00427007	6.33572e-05	0.0042062	Promoter (<=1kb)	chr12	85473901	85477270	3370	+	14281	uc007oha.2	628	ENSMUSG00000021250	Fos	FBJ osteosarcoma oncogene
1234	chr12	85599118	85599121	4	*	0.000289372	4.72565e-05	0.0013135	-0.00126624	Promoter (<=1kb)	chr12	85599105	85639878	40774	+	81703	uc007ohb.1	16	ENSMUSG00000034271	Jdp2	Jun dimerization protein 2
1235	chr12	85599462	85599669	208	*	2.81651e-05	0.00136048	3.45416e-05	0.00131923	Promoter (<=1kb)	chr12	85599416	85639878	40463	+	81703	uc007ohc.1	253	ENSMUSG00000034271	Jdp2	Jun dimerization protein 2
1236	chr12	85599863	85599888	26	*	9.94813e-06	0.00691203	0.00010554	0.00680649	Promoter (<=1kb)	chr12	85600018	85639878	39861	+	81703	uc029ruf.1	-155	ENSMUSG00000034271	Jdp2	Jun dimerization protein 2
1237	chr12	85629815	85629842	28	*	0.00024557	0.306931	0.42554	-0.118609	Intron (uc007ohb.1/81703, intron 2 of 3)	chr12	85600018	85639878	39861	+	81703	uc029ruf.1	29824	ENSMUSG00000034271	Jdp2	Jun dimerization protein 2
1238	chr12	85746510	85746555	46	*	8.20532e-05	0.221437	0.0105389	0.211279	Promoter (<=1kb)	chr12	85746539	85813585	67047	+	217721	uc007ohe.1	0	ENSMUSG00000034258	Mfsd7c	major facilitator superfamily domain containing 7C
1239	chr12	86058853	86058853	1	*	0.000511503	0.965387	0.548519	0.416867	Intron (uc007ohm.1/320244, intron 7 of 7)	chr12	86056743	86079041	22299	-	21809	uc007ohn.2	20188	ENSMUSG00000021253	Tgfb3	transforming growth factor, beta 3
1240	chr12	86823998	86824073	76	*	7.51788e-10	0.382671	0.0023968	0.380293	Distal Intergenic	chr12	86880703	86884814	4112	-	238330	uc007oia.2	60741	ENSMUSG00000034168	Irf2bpl	interferon regulatory factor 2 binding protein-like
1241	chr12	86883163	86883275	113	*	1.42953e-08	0.37365	0.00479533	0.368708	Promoter (1-2kb)	chr12	86880703	86884814	4112	-	238330	uc007oia.2	1539	ENSMUSG00000034168	Irf2bpl	interferon regulatory factor 2 binding protein-like
1242	chr12	86947104	86947152	49	*	0.00042062	0.0149865	0.00112343	0.0138688	Promoter (<=1kb)	chr12	86947041	86965366	18326	+	217732	uc007oib.4	111	ENSMUSG00000034157	Cipc	CLOCK interacting protein, circadian
1243	chr12	86947321	86947403	83	*	0.000860174	4.36594e-05	0.000799478	-0.000755819	Promoter (<=1kb)	chr12	86947343	86965366	18024	+	217732	uc007oic.4	0	ENSMUSG00000034157	Cipc	CLOCK interacting protein, circadian
1244	chr12	95694242	95694269	28	*	8.66784e-08	0.00298112	4.76507e-05	0.00293569	Promoter (2-3kb)	chr12	95692226	95785213	92988	+	399558	uc007olc.2	2043	ENSMUSG00000047414	Flrt2	fibronectin leucine rich transmembrane protein 2
1245	chr12	95695345	95695345	1	*	0.0040544	2.98975e-05	0.000194071	-0.000164173	Intron (uc007olc.2/399558, intron 1 of 1)	chr12	95692226	95785213	92988	+	399558	uc007olc.2	3119	ENSMUSG00000047414	Flrt2	fibronectin leucine rich transmembrane protein 2
1246	chr12	95695647	95695671	25	*	0.00483445	0.000240841	0.0049687	-0.00472786	Intron (uc007olc.2/399558, intron 1 of 1)	chr12	95692226	95785213	92988	+	399558	uc007olc.2	3445	ENSMUSG00000047414	Flrt2	fibronectin leucine rich transmembrane protein 2
1247	chr12	95695755	95695875	121	*	9.61815e-05	0.000574428	3.15487e-05	0.00054288	Intron (uc007olc.2/399558, intron 1 of 1)	chr12	95692226	95785213	92988	+	399558	uc007olc.2	3649	ENSMUSG00000047414	Flrt2	fibronectin leucine rich transmembrane protein 2
1248	chr12	98746876	98746923	48	*	0.000107297	3.10278e-05	0.000745601	-0.000714573	Promoter (<=1kb)	chr12	98746968	98787774	40807	+	75553	uc007org.1	-92	ENSMUSG00000021012	Zc3h14	zinc finger CCCH type containing 14
1249	chr12	98900970	98901053	84	*	9.49578e-13	3.18024e-05	0.00531061	-0.00527881	Promoter (<=1kb)	chr12	98786604	98901484	114881	-	319670	uc007orn.1	431	ENSMUSG00000051166	Eml5	echinoderm microtubule associated protein like 5
1250	chr12	98901462	98901560	99	*	3.1704e-07	0.00700891	5.34927e-05	0.00695958	Promoter (<=1kb)	chr12	98786604	98901484	114881	-	319670	uc007orn.1	0	ENSMUSG00000051166	Eml5	echinoderm microtubule associated protein like 5
1251	chr12	101975715	101975824	110	*	1.6639e-08	0.0194182	7.55635e-05	0.0193427	Promoter (<=1kb)	chr12	101975974	102005993	30020	+	51786	uc007otx.2	-259	ENSMUSG00000041781	Cpsf2	cleavage and polyadenylation specific factor 2
1252	chr12	101976254	101976278	25	*	1.59862e-11	0.38507	0.00134897	0.383721	Promoter (<=1kb)	chr12	101975974	102005993	30020	+	51786	uc007otx.2	304	ENSMUSG00000041781	Cpsf2	cleavage and polyadenylation specific factor 2
1253	chr12	102663254	102663303	50	*	8.96095e-09	0.66907	0.802479	-0.132563	Intron (uc007ouj.1/217837, intron 8 of 9)	chr12	102684928	102685020	93	-	100316812	uc011yqn.1	21717	#N/A	Mir1936	microRNA 1936
1254	chr12	102757969	102758084	116	*	1.55849e-07	0.00304695	3.8117e-05	0.00301476	Promoter (<=1kb)	chr12	102757975	102768285	10311	+	66622	uc007ouo.1	0	ENSMUSG00000041712	Ubr7	ubiquitin protein ligase E3 component n-recognin 7 (putative)
1255	chr12	102758395	102758395	1	*	0.00277961	0.00478425	0.139292	-0.134508	Promoter (<=1kb)	chr12	102757975	102768285	10311	+	66622	uc007ouo.1	420	ENSMUSG00000041712	Ubr7	ubiquitin protein ligase E3 component n-recognin 7 (putative)
1256	chr12	102877584	102877723	140	*	3.51979e-08	0.00342383	4.27145e-05	0.00338259	Promoter (<=1kb)	chr12	102784648	102878406	93759	-	238386	uc007ouq.1	683	ENSMUSG00000041702	Btbd7	BTB (POZ) domain containing 7
1257	chr12	102877936	102878044	109	*	2.22703e-06	0.0021915	3.34022e-05	0.0021581	Promoter (<=1kb)	chr12	102784648	102878406	93759	-	238386	uc007ouq.1	362	ENSMUSG00000041702	Btbd7	BTB (POZ) domain containing 7
1258	chr12	102948838	102949037	200	*	1.05134e-05	0.374436	0.0145794	0.343915	Promoter (<=1kb)	chr12	102948859	103183997	235139	+	217843	uc007ouw.2	0	ENSMUSG00000021198	Unc79	unc-79 homolog (C. elegans)
1259	chr12	103425736	103425783	48	*	8.45561e-06	3.81569e-05	0.00337486	-0.00333671	Promoter (<=1kb)	chr12	103407976	103425780	17805	-	27225	uc007ovi.2	0	ENSMUSG00000041645	Ddx24	DEAD (Asp-Glu-Ala-Asp) box polypeptide 24
1260	chr12	103425880	103425916	37	*	2.07162e-07	0.00517692	4.61164e-05	0.0051308	Promoter (<=1kb)	chr12	103407976	103425867	17892	-	27225	uc007ovj.2	-13	ENSMUSG00000041645	Ddx24	DEAD (Asp-Glu-Ala-Asp) box polypeptide 24
1261	chr12	105032345	105032458	114	*	1.67031e-05	0.000712746	3.324e-05	0.000679506	Promoter (<=1kb)	chr12	105030617	105032279	1663	-	69434	uc007oxt.2	-66	#N/A	Snhg10	small nucleolar RNA host gene 10
1262	chr12	105032592	105032592	1	*	1.64841e-05	5.97861e-05	0.00594426	-0.00588447	Promoter (<=1kb)	chr12	105032689	105040910	8222	+	73046	uc007oxu.1	-97	ENSMUSG00000021102	Glrx5	glutaredoxin 5 homolog (S. cerevisiae)
1263	chr12	105032718	105032749	32	*	4.67873e-05	0.000614036	3.01365e-05	0.000583891	Promoter (<=1kb)	chr12	105032689	105040910	8222	+	73046	uc007oxu.1	60	ENSMUSG00000021102	Glrx5	glutaredoxin 5 homolog (S. cerevisiae)
1264	chr12	105032920	105033014	95	*	0.00115666	0.000129028	0.00392821	-0.00378954	Promoter (<=1kb)	chr12	105032689	105040910	8222	+	73046	uc007oxu.1	325	ENSMUSG00000021102	Glrx5	glutaredoxin 5 homolog (S. cerevisiae)
1265	chr12	105445705	105445755	51	*	0.000418149	0.780703	0.981868	-0.201165	Distal Intergenic	chr12	105453856	105493095	39240	+	268595	uc007oyk.2	-8151	ENSMUSG00000094910	D430019H16Rik	RIKEN cDNA D430019H16 gene
1266	chr12	105604643	105604643	1	*	0.00109829	0.762329	0.98192	-0.219591	Promoter (<=1kb)	chr12	105604091	105605428	1338	+	12061	uc007oyn.1	552	ENSMUSG00000041347	Bdkrb1	bradykinin receptor, beta 1
1267	chr12	105747321	105747321	1	*	0.000687987	0.762711	0.975584	-0.212872	Intron (uc007oyt.1/78801, intron 12 of 17)	chr12	105718856	105739243	20388	+	78801	uc007oyu.1	28465	ENSMUSG00000041323	Ak7	adenylate kinase 7
1268	chr12	105784518	105784551	34	*	1.69525e-06	0.00285828	4.77445e-05	0.00281054	Promoter (<=1kb)	chr12	105784702	105809709	25008	+	18789	uc007oyv.1	-184	ENSMUSG00000021111	Papola	poly (A) polymerase alpha
1269	chr12	106069013	106069037	25	*	7.0717e-05	0.558437	0.785254	-0.226817	Intron (uc007ozb.1/22367, intron 11 of 14)	chr12	106010263	106077410	67148	+	22367	uc007ozb.1	58774	ENSMUSG00000021115	Vrk1	vaccinia related kinase 1
1270	chr12	108276560	108276581	22	*	0.000225402	0.0683279	0.00265789	0.06567	Promoter (1-2kb)	chr12	108206345	108275417	69073	-	668158	uc011yrs.1	-1143	ENSMUSG00000084883	Ccdc85c	coiled-coil domain containing 85C
1271	chr12	108423025	108423073	49	*	1.54865e-06	0.00331667	5.14687e-05	0.00327204	Promoter (<=1kb)	chr12	108422816	108539564	116749	+	68519	uc007ozs.1	257	ENSMUSG00000058070	Eml1	echinoderm microtubule associated protein like 1
1272	chr12	108436206	108436206	1	*	5.05983e-05	0.440173	0.131838	0.308335	Intron (uc007ozp.2/68519, intron 1 of 6)	chr12	108422816	108539564	116749	+	68519	uc007ozs.1	13390	ENSMUSG00000058070	Eml1	echinoderm microtubule associated protein like 1
1273	chr12	108793772	108793895	124	*	1.54517e-06	0.00291412	4.59919e-05	0.00286813	Promoter (<=1kb)	chr12	108793311	108816632	23322	+	22632	uc007pac.1	584	ENSMUSG00000021264	Yy1	YY1 transcription factor
1274	chr12	108826212	108826261	50	*	1.72093e-05	0.865361	0.993015	-0.127654	3' UTR	chr12	108825878	108835876	9999	-	214663	uc007pad.1	9615	ENSMUSG00000021265	Slc25a29	solute carrier family 25 (mitochondrial carrier, palmitoylcarnitine transporter), member 29
1275	chr12	109399649	109399697	49	*	6.72464e-07	0.401343	0.00346575	0.397877	Distal Intergenic	chr12	109452823	109463336	10514	+	13386	uc007pam.2	-53174	ENSMUSG00000040856	Dlk1	delta-like 1 homolog (Drosophila)
1276	chr12	110447033	110447123	91	*	4.37443e-06	3.49681e-05	0.00153652	-0.00150155	Promoter (<=1kb)	chr12	110447179	110450997	3819	+	26931	uc007pbj.2	-146	ENSMUSG00000017843	Ppp2r5c	protein phosphatase 2, regulatory subunit B', gamma
1277	chr12	110447307	110447307	1	*	0.00126897	0.00175075	0.0863888	-0.0846381	Promoter (<=1kb)	chr12	110447179	110450997	3819	+	26931	uc007pbj.2	128	ENSMUSG00000017843	Ppp2r5c	protein phosphatase 2, regulatory subunit B', gamma
1278	chr12	110447350	110447459	110	*	2.03955e-05	0.00110431	3.30709e-05	0.00107124	Promoter (<=1kb)	chr12	110447179	110450997	3819	+	26931	uc007pbj.2	280	ENSMUSG00000017843	Ppp2r5c	protein phosphatase 2, regulatory subunit B', gamma
1279	chr12	110447578	110447622	45	*	4.50108e-06	3.1075e-05	0.00256247	-0.00253013	Promoter (<=1kb)	chr12	110447179	110450997	3819	+	26931	uc007pbj.2	443	ENSMUSG00000017843	Ppp2r5c	protein phosphatase 2, regulatory subunit B', gamma
1280	chr12	110521043	110521043	1	*	0.00164406	0.846057	0.976401	-0.130344	Intron (uc011yur.1/26931, intron 3 of 13)	chr12	110485739	110571690	85952	+	26931	uc007pbk.1	35304	ENSMUSG00000017843	Ppp2r5c	protein phosphatase 2, regulatory subunit B', gamma
1281	chr12	110840635	110840635	1	*	0.00329394	0.0203054	0.000902811	0.0194026	Promoter (<=1kb)	chr12	110807798	110840939	33142	-	26448	uc007pbv.1	304	ENSMUSG00000056458	Mok	MOK protein kinase
1282	chr12	110840889	110840964	76	*	4.65302e-05	0.00329869	5.4905e-05	0.00324379	Promoter (<=1kb)	chr12	110807798	110840939	33142	-	26448	uc007pbv.1	0	ENSMUSG00000056458	Mok	MOK protein kinase
1283	chr12	110850075	110850199	125	*	6.1075e-10	0.00890475	4.66785e-05	0.00885808	Promoter (<=1kb)	chr12	110850279	110869998	19720	+	72805	uc007pca.2	-204	ENSMUSG00000021271	Zfp839	zinc finger protein 839
1284	chr12	110850335	110850335	1	*	2.26863e-05	2.99962e-05	0.0011996	-0.0011696	Promoter (<=1kb)	chr12	110850279	110869998	19720	+	72805	uc007pca.2	56	ENSMUSG00000021271	Zfp839	zinc finger protein 839
1285	chr12	110850611	110850636	26	*	2.41559e-07	3.13451e-05	0.00208838	-0.00205704	Promoter (<=1kb)	chr12	110850279	110869998	19720	+	72805	uc007pca.2	357	ENSMUSG00000021271	Zfp839	zinc finger protein 839
1286	chr12	110850648	110850663	16	*	2.95933e-09	0.384741	0.00272473	0.381971	Promoter (<=1kb)	chr12	110850279	110869998	19720	+	72805	uc007pca.2	384	ENSMUSG00000021271	Zfp839	zinc finger protein 839
1287	chr12	110850668	110850668	1	*	2.40779e-07	2.98164e-05	0.00279362	-0.0027638	Promoter (<=1kb)	chr12	110850279	110869998	19720	+	72805	uc007pca.2	389	ENSMUSG00000021271	Zfp839	zinc finger protein 839
1288	chr12	110855506	110855561	56	*	0.000118247	0.778295	0.896705	-0.118713	Exon (uc007pca.2/72805, exon 2 of 7)	chr12	110850279	110869998	19720	+	72805	uc007pca.2	5282	ENSMUSG00000021271	Zfp839	zinc finger protein 839
1289	chr12	110888759	110888813	55	*	4.47028e-08	0.36228	0.00375094	0.358529	Promoter (<=1kb)	chr12	110872610	110889145	16536	-	67236	uc007pcb.2	332	ENSMUSG00000021276	Cinp	cyclin-dependent kinase 2 interacting protein
1290	chr12	110889225	110889368	144	*	0.000146307	3.33903e-05	0.000802294	-0.000768904	Promoter (<=1kb)	chr12	110889264	110939679	50416	+	104859	uc007pcf.2	0	ENSMUSG00000021275	Tecpr2	tectonin beta-propeller repeat containing 2
1291	chr12	110889747	110889758	12	*	0.000646577	0.0217211	0.251999	-0.230277	Promoter (<=1kb)	chr12	110889264	110939679	50416	+	104859	uc007pcf.2	494	ENSMUSG00000021275	Tecpr2	tectonin beta-propeller repeat containing 2
1292	chr12	110979080	110979282	203	*	3.34072e-06	0.298063	0.00423803	0.29234	Promoter (<=1kb)	chr12	110975353	110979021	3669	-	74251	uc007pci.1	-59	ENSMUSG00000037904	Ankrd9	ankyrin repeat domain 9
1293	chr12	111429851	111429851	1	*	0.000366078	6.22598e-05	0.001671	-0.00160874	Intron (uc007pcx.3/74190, intron 12 of 12)	chr12	111421499	111431680	10182	+	74190	uc011yuw.2	8352	ENSMUSG00000021280	Exoc3l4	exocyst complex component 3-like 4
1294	chr12	111442582	111442590	9	*	3.10856e-11	0.00595717	3.99931e-05	0.00591717	Promoter (<=1kb)	chr12	111442661	111455018	12358	+	21928	uc007pcy.2	-79	ENSMUSG00000021281	Tnfaip2	tumor necrosis factor, alpha-induced protein 2
1295	chr12	111538176	111538208	33	*	0.000191174	3.14661e-05	0.000659279	-0.000628084	Promoter (<=1kb)	chr12	111538101	111546753	8653	+	217869	uc007pdd.2	107	ENSMUSG00000021282	Eif5	eukaryotic translation initiation factor 5
1296	chr12	111538541	111538647	107	*	2.21671e-07	0.00312695	3.81818e-05	0.00308877	Promoter (<=1kb)	chr12	111538855	111546753	7899	+	217869	uc007pdg.2	-314	ENSMUSG00000021282	Eif5	eukaryotic translation initiation factor 5
1297	chr12	111575679	111575679	1	*	0.000124614	7.07984e-05	0.00328481	-0.00321401	Promoter (1-2kb)	chr12	111574510	111656227	81718	+	17169	uc007pdk.2	1169	ENSMUSG00000007411	Mark3	MAP/microtubule affinity regulating kinase 3
1298	chr12	111813837	111813867	31	*	4.2565e-08	0.0145252	5.45582e-05	0.0144706	Promoter (<=1kb)	chr12	111803193	111813841	10649	-	74335	uc007pdz.1	0	ENSMUSG00000021287	Xrcc3	X-ray repair complementing defective repair in Chinese hamster cells 3
1299	chr12	112277792	112277935	144	*	2.20712e-05	0.613107	0.76337	-0.14612	Distal Intergenic	chr12	112146208	112181747	35540	+	668303	uc007pem.1	131727	ENSMUSG00000021294	Kif26a	kinesin family member 26A
1300	chr12	112503139	112503139	1	*	0.000221417	0.144788	0.00910051	0.135687	Intron (uc007per.1/104885, intron 1 of 3)	chr12	112500184	112511160	10977	-	104885	uc007per.1	8021	ENSMUSG00000054013	Tmem179	transmembrane protein 179
1301	chr12	112678665	112678721	57	*	4.1788e-08	0.381366	0.00419728	0.377169	Promoter (<=1kb)	chr12	112678840	112681259	2420	+	382639	uc007pez.2	-175	ENSMUSG00000037638	Zbtb42	zinc finger and BTB domain containing 42
1302	chr12	112678939	112678939	1	*	0.00292423	7.74594e-05	0.0022132	-0.00213574	Promoter (<=1kb)	chr12	112678840	112681259	2420	+	382639	uc007pez.2	99	ENSMUSG00000037638	Zbtb42	zinc finger and BTB domain containing 42
1303	chr12	112722348	112722372	25	*	3.78267e-06	0.00185069	4.40685e-05	0.00180662	Promoter (<=1kb)	chr12	112722174	112746591	24418	+	217882	uc007pfb.1	198	ENSMUSG00000072825	Cep170b	centrosomal protein 170B
1304	chr12	112722450	112722495	46	*	1.91365e-07	4.86453e-05	0.00481913	-0.00477049	Promoter (<=1kb)	chr12	112722174	112746591	24418	+	217882	uc007pfb.1	321	ENSMUSG00000072825	Cep170b	centrosomal protein 170B
1305	chr12	112938800	112938830	31	*	0.00191385	0.963662	0.896993	0.0666687	Exon (uc007pfm.1/66174, exon 3 of 5)	chr12	112934733	112942118	7386	-	66174	uc007pfm.1	3288	ENSMUSG00000002804	Nudt14	nudix (nucleoside diphosphate linked moiety X)-type motif 14
1306	chr12	112942065	112942123	59	*	2.47135e-13	0.384265	0.000569978	0.383695	Promoter (<=1kb)	chr12	112934733	112942118	7386	-	66174	uc007pfm.1	0	ENSMUSG00000002804	Nudt14	nudix (nucleoside diphosphate linked moiety X)-type motif 14
1307	chr12	116047908	116047981	74	*	3.8479e-05	0.000709611	3.06935e-05	0.000678917	Promoter (<=1kb)	chr12	116047724	116055015	7292	+	56220	uc007pha.1	257	ENSMUSG00000042063	Zfp386	zinc finger protein 386 (Kruppel-like)
1308	chr12	116262777	116262840	64	*	7.74289e-06	0.00354154	6.1573e-05	0.00347996	Promoter (<=1kb)	chr12	116207050	116263025	55976	-	217935	uc007phj.1	185	ENSMUSG00000042050	Wdr60	WD repeat domain 60
1309	chr12	116281488	116281573	86	*	0.0002904	0.000663106	3.60804e-05	0.000625677	Promoter (<=1kb)	chr12	116281222	116372221	91000	+	52635	uc007phn.1	351	ENSMUSG00000021171	Esyt2	extended synaptotagmin-like protein 2
1310	chr12	117534244	117534290	47	*	2.87134e-06	0.00274355	5.08913e-05	0.00269266	Promoter (<=1kb)	chr12	117533939	117658403	124465	+	217944	uc007pic.1	351	ENSMUSG00000041992	Rapgef5	Rap guanine nucleotide exchange factor (GEF) 5
1311	chr13	3538080	3538153	74	*	6.45256e-11	0.384474	0.00119895	0.383278	Promoter (<=1kb)	chr13	3538075	3566261	28187	+	14569	uc007piu.1	78	ENSMUSG00000021218	Gdi2	guanosine diphosphate (GDP) dissociation inhibitor 2
1312	chr13	3538314	3538335	22	*	1.52418e-07	3.38764e-05	0.00299333	-0.00295946	Promoter (<=1kb)	chr13	3538075	3566261	28187	+	14569	uc007piu.1	260	ENSMUSG00000021218	Gdi2	guanosine diphosphate (GDP) dissociation inhibitor 2
1313	chr13	5861319	5861429	111	*	8.15034e-06	0.00434135	6.28964e-05	0.00425028	Promoter (<=1kb)	chr13	5861489	5870393	8905	+	23849	uc007pjw.1	-170	ENSMUSG00000000078	Klf6	Kruppel-like factor 6
1314	chr13	5861603	5861710	108	*	0.000127143	0.00178989	4.93669e-05	0.0017332	Promoter (<=1kb)	chr13	5861489	5870393	8905	+	23849	uc007pjw.1	221	ENSMUSG00000000078	Klf6	Kruppel-like factor 6
1315	chr13	8885539	8885539	1	*	2.1541e-09	0.0216335	9.0646e-05	0.0215429	Promoter (<=1kb)	chr13	8885606	8892396	6791	+	319554	uc007pkn.2	-67	ENSMUSG00000058258	Idi1	isopentenyl-diphosphate delta isomerase
1316	chr13	9093682	9093756	75	*	2.5768e-05	0.000958301	3.23571e-05	0.000925479	Promoter (<=1kb)	chr13	9093905	9173090	79186	+	217980	uc007pkr.1	-223	ENSMUSG00000033499	Larp4b	La ribonucleoprotein domain family, member 4B
1317	chr13	9093997	9094062	66	*	6.00413e-05	0.00177968	4.99714e-05	0.00172971	Promoter (<=1kb)	chr13	9093905	9173090	79186	+	217980	uc007pkr.1	157	ENSMUSG00000033499	Larp4b	La ribonucleoprotein domain family, member 4B
1318	chr13	9094358	9094358	1	*	0.00157002	0.0546269	0.00209659	0.0525303	Promoter (<=1kb)	chr13	9093905	9173090	79186	+	217980	uc007pkr.1	453	ENSMUSG00000033499	Larp4b	La ribonucleoprotein domain family, member 4B
1319	chr13	9094618	9094716	99	*	0.000215429	3.10928e-05	0.000942637	-0.000912488	Promoter (<=1kb)	chr13	9093905	9173090	79186	+	217980	uc007pkr.1	811	ENSMUSG00000033499	Larp4b	La ribonucleoprotein domain family, member 4B
1320	chr13	10360531	10360613	83	*	1.15849e-06	0.00165756	3.46923e-05	0.00162287	Promoter (<=1kb)	chr13	9876613	10360803	484191	-	12671	uc007plb.1	190	ENSMUSG00000046159	Chrm3	cholinergic receptor, muscarinic 3, cardiac
1321	chr13	12461376	12461430	55	*	9.12184e-07	4.21732e-05	0.00432372	-0.00428155	Promoter (<=1kb)	chr13	12439402	12461738	22337	-	56048	uc007plm.3	308	ENSMUSG00000057554	Lgals8	lectin, galactose binding, soluble 8
1322	chr13	13393510	13393543	34	*	5.43032e-06	0.00572374	7.65047e-05	0.00564723	Promoter (<=1kb)	chr13	13357620	13393595	35976	-	83924	uc007pmc.2	52	ENSMUSG00000021306	Gpr137b	G protein-coupled receptor 137B
1323	chr13	14063666	14063882	217	*	1.36201e-06	0.00110752	3.1834e-05	0.00107599	Promoter (<=1kb)	chr13	14063784	14165682	101899	+	94246	uc007pmy.2	0	ENSMUSG00000039219	Arid4b	AT rich interactive domain 4B (RBP1-like)
1324	chr13	14064365	14064383	19	*	3.71563e-07	4.0564e-05	0.00383374	-0.00379318	Promoter (<=1kb)	chr13	14063784	14165682	101899	+	94246	uc007pmy.2	599	ENSMUSG00000039219	Arid4b	AT rich interactive domain 4B (RBP1-like)
1325	chr13	14064404	14064405	2	*	1.44233e-05	0.310098	0.00438367	0.305715	Promoter (<=1kb)	chr13	14063784	14165682	101899	+	94246	uc007pmy.2	621	ENSMUSG00000039219	Arid4b	AT rich interactive domain 4B (RBP1-like)
1326	chr13	14064412	14064412	1	*	3.56167e-07	3.95292e-05	0.00369232	-0.00365279	Promoter (<=1kb)	chr13	14063784	14165682	101899	+	94246	uc007pmy.2	628	ENSMUSG00000039219	Arid4b	AT rich interactive domain 4B (RBP1-like)
1327	chr13	17803672	17803672	1	*	0.00016902	0.0114514	0.000230441	0.011221	Promoter (1-2kb)	chr13	17715962	17805097	89136	-	69562	uc007poc.2	1425	ENSMUSG00000041297	Cdk13	cyclin-dependent kinase 13
1328	chr13	17803958	17804097	140	*	1.06155e-10	0.379327	0.00142092	0.377724	Promoter (<=1kb)	chr13	17715962	17805097	89136	-	69562	uc007poc.2	1000	ENSMUSG00000041297	Cdk13	cyclin-dependent kinase 13
1329	chr13	17804380	17804381	2	*	0.00132607	0.0191678	0.000432807	0.018735	Promoter (<=1kb)	chr13	17715962	17805097	89136	-	69562	uc007poc.2	716	ENSMUSG00000041297	Cdk13	cyclin-dependent kinase 13
1330	chr13	17804403	17804460	58	*	3.77176e-08	3.26375e-05	0.00378342	-0.00375078	Promoter (<=1kb)	chr13	17715962	17805097	89136	-	69562	uc007poc.2	637	ENSMUSG00000041297	Cdk13	cyclin-dependent kinase 13
1331	chr13	17804647	17804697	51	*	3.08489e-05	0.000741742	3.05433e-05	0.00071122	Promoter (<=1kb)	chr13	17715962	17805097	89136	-	69562	uc007poc.2	400	ENSMUSG00000041297	Cdk13	cyclin-dependent kinase 13
1332	chr13	17805391	17805397	7	*	1.05289e-10	0.00748889	4.19954e-05	0.00744689	Promoter (<=1kb)	chr13	17715962	17805097	89136	-	69562	uc007poc.2	-294	ENSMUSG00000041297	Cdk13	cyclin-dependent kinase 13
1333	chr13	17805525	17805589	65	*	4.85061e-09	0.377512	0.00232879	0.375183	Promoter (<=1kb)	chr13	17715962	17805097	89136	-	69562	uc007poc.2	-428	ENSMUSG00000041297	Cdk13	cyclin-dependent kinase 13
1334	chr13	17993085	17993170	86	*	0.000177609	3.29467e-05	0.000642473	-0.000609419	Promoter (<=1kb)	chr13	17986640	17993351	6712	-	67008	uc007pog.2	181	ENSMUSG00000075054	Yae1d1	Yae1 domain containing 1
1335	chr13	19395456	19395552	97	*	8.7299e-10	0.377805	0.00223485	0.375361	Promoter (<=1kb)	chr13	19357676	19395752	38077	-	76205	uc007ppa.1	200	ENSMUSG00000003062	Stard3nl	STARD3 N-terminal like
1336	chr13	21382237	21382275	39	*	0.000386695	0.475514	0.0264468	0.449067	Distal Intergenic	chr13	21387004	21394581	7578	-	72739	uc011ywo.1	12306	ENSMUSG00000021327	Zkscan3	zinc finger with KRAB and SCAN domains 3
1337	chr13	21530762	21530762	1	*	0.000326941	0.00363198	0.000105511	0.00352647	Promoter (<=1kb)	chr13	21513221	21531114	17894	-	93681	uc007pqr.2	352	ENSMUSG00000063894	Zkscan8	zinc finger with KRAB and SCAN domains 8
1338	chr13	21945239	21945325	87	*	5.95054e-07	3.05163e-05	0.00136786	-0.00133729	Promoter (<=1kb)	chr13	21945094	21960485	15392	+	193452	uc007pry.1	231	ENSMUSG00000006720	Zfp184	zinc finger protein 184 (Kruppel-like)
1339	chr13	22050954	22051027	74	*	0.000189348	3.41654e-05	0.000819787	-0.000784768	Distal Intergenic	chr13	22043230	22043658	429	+	319183	uc007pse.2	7797	ENSMUSG00000069300	Hist1h2bj	histone cluster 1, H2bj
1340	chr13	23438198	23438198	1	*	3.89154e-06	6.08489e-05	0.00337897	-0.00331813	Distal Intergenic	chr13	23427976	23431017	3042	-	320842	uc007ptp.1	-7181	ENSMUSG00000085024	C230035I16Rik	RIKEN cDNA C230035I16 gene
1341	chr13	23445874	23445922	49	*	1.57413e-06	0.00202935	3.71765e-05	0.00199218	Distal Intergenic	chr13	23427976	23431017	3042	-	320842	uc007ptp.1	-14857	ENSMUSG00000085024	C230035I16Rik	RIKEN cDNA C230035I16 gene
1342	chr13	23531185	23531233	49	*	2.2943e-07	0.37464	0.00505643	0.369606	Promoter (<=1kb)	chr13	23531044	23531478	435	+	69386	uc007ptv.3	189	ENSMUSG00000060981	Hist1h4h	histone cluster 1, H4h
1343	chr13	23622462	23622530	69	*	2.58438e-07	3.09023e-05	0.00158618	-0.00155528	Promoter (<=1kb)	chr13	23621777	23622558	782	-	50709	uc007puj.3	28	ENSMUSG00000051627	Hist1h1e	histone cluster 1, H1e
1344	chr13	24801815	24801864	50	*	0.000102509	3.25383e-05	0.000778372	-0.000745833	Promoter (<=1kb)	chr13	24801657	24812899	11243	+	79555	uc007pwi.1	207	ENSMUSG00000019132	BC005537	cDNA sequence BC005537
1345	chr13	24802081	24802132	52	*	6.35854e-05	4.88671e-05	0.00236186	-0.0023125	Promoter (<=1kb)	chr13	24801657	24812899	11243	+	79555	uc007pwi.1	475	ENSMUSG00000019132	BC005537	cDNA sequence BC005537
1346	chr13	24802228	24802367	140	*	0.000235522	0.00235427	7.59817e-05	0.00227829	Promoter (<=1kb)	chr13	24801657	24812899	11243	+	79555	uc007pwi.1	710	ENSMUSG00000019132	BC005537	cDNA sequence BC005537
1347	chr13	28885505	28885505	1	*	0.00010794	0.00606278	0.000117451	0.00594533	Promoter (<=1kb)	chr13	28460034	28885422	425389	-	72518	uc007pyi.2	-83	#N/A	2610307P16Rik	RIKEN cDNA 2610307P16 gene
1348	chr13	30544982	30545070	89	*	1.9511e-06	0.00204443	4.519e-05	0.00200221	Promoter (<=1kb)	chr13	30540312	30545316	5005	-	66694	uc007pyv.2	246	ENSMUSG00000038462	Uqcrfs1	ubiquinol-cytochrome c reductase, Rieske iron-sulfur polypeptide 1
1349	chr13	31625259	31625332	74	*	3.54631e-07	3.66129e-05	0.00217971	-0.00214309	Promoter (<=1kb)	chr13	31578156	31625792	47637	-	71307	uc007pzn.1	460	ENSMUSG00000038408	1700018A04Rik	RIKEN cDNA 1700018A04 gene
1350	chr13	31807042	31807087	46	*	1.04409e-06	0.00191929	3.21269e-05	0.00188716	Promoter (<=1kb)	chr13	31806646	31810635	3990	+	17300	uc007pzp.1	441	ENSMUSG00000050295	Foxc1	forkhead box C1
1351	chr13	31807190	31807190	1	*	0.0018428	0.000469421	0.0142412	-0.0137718	Promoter (<=1kb)	chr13	31806646	31810635	3990	+	17300	uc007pzp.1	544	ENSMUSG00000050295	Foxc1	forkhead box C1
1352	chr13	32802350	32802486	137	*	1.45711e-13	0.382523	0.000674929	0.381845	Promoter (<=1kb)	chr13	32802030	32822607	20578	+	78903	uc007pzs.2	456	ENSMUSG00000021400	Wrnip1	Werner helicase interacting protein 1
1353	chr13	34037729	34037806	78	*	7.62255e-07	3.01011e-05	0.00134554	-0.00131544	Promoter (<=1kb)	chr13	34037641	34061886	24246	+	68021	uc007qaz.1	165	ENSMUSG00000038286	Bphl	biphenyl hydrolase-like (serine hydrolase, breast epithelial mucin-associated antigen)
1354	chr13	34163102	34163108	7	*	5.33199e-05	0.0189517	0.000254451	0.0186973	Promoter (<=1kb)	chr13	34162964	34178172	15209	+	69666	uc007qbe.3	144	ENSMUSG00000071451	Psmg4	proteasome (prosome, macropain) assembly chaperone 4
1355	chr13	34652425	34652493	69	*	5.78667e-05	3.23869e-05	0.000995717	-0.000963072	Promoter (<=1kb)	chr13	34627841	34652681	24841	-	66895	uc007qbi.1	188	ENSMUSG00000021411	Pxdc1	PX domain containing 1
1356	chr13	34652701	34652701	1	*	4.44137e-10	0.434382	0.00134278	0.433039	Promoter (<=1kb)	chr13	34627841	34652681	24841	-	66895	uc007qbi.1	-20	ENSMUSG00000021411	Pxdc1	PX domain containing 1
1357	chr13	34652733	34652795	63	*	3.5939e-05	3.28435e-05	0.00122488	-0.00119203	Promoter (<=1kb)	chr13	34627841	34652681	24841	-	66895	uc007qbi.1	-52	ENSMUSG00000021411	Pxdc1	PX domain containing 1
1358	chr13	34874433	34874475	43	*	0.000251561	6.29666e-05	0.00193599	-0.00187302	Promoter (1-2kb)	chr13	34875494	34884766	9273	+	19134	uc007qbn.2	-1061	ENSMUSG00000021413	Prpf4b	PRP4 pre-mRNA processing factor 4 homolog B (yeast)
1359	chr13	34875507	34875554	48	*	4.01846e-05	0.000724155	3.13145e-05	0.00069284	Promoter (<=1kb)	chr13	34875494	34884766	9273	+	19134	uc007qbn.2	60	ENSMUSG00000021413	Prpf4b	PRP4 pre-mRNA processing factor 4 homolog B (yeast)
1360	chr13	34876056	34876256	201	*	1.0702e-06	0.00703785	6.28917e-05	0.00697496	Promoter (<=1kb)	chr13	34875494	34884766	9273	+	19134	uc007qbn.2	762	ENSMUSG00000021413	Prpf4b	PRP4 pre-mRNA processing factor 4 homolog B (yeast)
1361	chr13	35740882	35741003	122	*	1.09787e-11	0.00383866	3.99899e-05	0.0038073	Promoter (<=1kb)	chr13	35741402	35874064	132663	+	12593	uc007qcg.2	-520	ENSMUSG00000059288	Cdyl	chromodomain protein, Y chromosome-like
1362	chr13	35741197	35741410	214	*	1.32308e-08	0.382889	0.00661595	0.376264	Promoter (<=1kb)	chr13	35741402	35874064	132663	+	12593	uc007qcg.2	0	ENSMUSG00000059288	Cdyl	chromodomain protein, Y chromosome-like
1363	chr13	35741835	35741886	52	*	2.46602e-07	3.01671e-05	0.00151843	-0.00148826	Promoter (<=1kb)	chr13	35741402	35874064	132663	+	12593	uc007qcg.2	484	ENSMUSG00000059288	Cdyl	chromodomain protein, Y chromosome-like
1364	chr13	35742214	35742299	86	*	0.00103276	0.100887	0.00619434	0.0946924	Promoter (<=1kb)	chr13	35741402	35874064	132663	+	12593	uc007qcg.2	897	ENSMUSG00000059288	Cdyl	chromodomain protein, Y chromosome-like
1365	chr13	36724785	36724827	43	*	0.000325365	0.00848008	0.118675	-0.110168	Distal Intergenic	chr13	36725622	36734477	8856	-	68404	uc007qcm.3	9650	ENSMUSG00000039114	Nrn1	neuritin 1
1366	chr13	37778603	37778608	6	*	4.85546e-05	0.0118381	0.000164943	0.0116731	Distal Intergenic	chr13	37826038	37935534	109497	+	68750	uc007qcw.2	-47435	ENSMUSG00000039087	Rreb1	ras responsive element binding protein 1
1367	chr13	37778838	37778852	15	*	7.96157e-06	0.011326	0.000167071	0.0111589	Distal Intergenic	chr13	37826038	37935534	109497	+	68750	uc007qcw.2	-47200	ENSMUSG00000039087	Rreb1	ras responsive element binding protein 1
1368	chr13	38037151	38037352	202	*	6.6217e-10	0.380064	0.00172662	0.378317	Promoter (<=1kb)	chr13	38020911	38037069	16159	-	71213	uc007qdf.1	-82	ENSMUSG00000044566	Cage1	cancer antigen 1
1369	chr13	38037490	38037626	137	*	1.06438e-07	0.000129898	0.0111292	-0.0109993	Promoter (<=1kb)	chr13	38020911	38037069	16159	-	71213	uc007qdf.1	-421	ENSMUSG00000044566	Cage1	cancer antigen 1
1370	chr13	38346676	38346720	45	*	7.65947e-56	4.41165e-05	0.0515442	-0.0515001	Promoter (1-2kb)	chr13	38345716	38499728	154013	+	12161	uc007qdp.1	1004	ENSMUSG00000039004	Bmp6	bone morphogenetic protein 6
1371	chr13	41001174	41001224	51	*	1.72115e-08	0.00379756	3.73643e-05	0.00376019	Promoter (<=1kb)	chr13	41001010	41008604	7595	+	68083	uc007qeq.2	214	ENSMUSG00000038683	Pak1ip1	PAK1 interacting protein 1
1372	chr13	41001384	41001433	50	*	1.80788e-06	2.9704e-05	0.000715247	-0.000685534	Promoter (<=1kb)	chr13	41001010	41008604	7595	+	68083	uc007qeq.2	423	ENSMUSG00000038683	Pak1ip1	PAK1 interacting protein 1
1373	chr13	41249635	41249659	25	*	0.000183647	0.000242591	0.0193059	-0.0190633	Promoter (<=1kb)	chr13	41249844	41276577	26734	+	108934	uc007qfc.2	-209	ENSMUSG00000091264	Smim13	small integral membrane protein 13
1374	chr13	41249666	41249700	35	*	1.42008e-05	0.367206	0.00866261	0.358543	Promoter (<=1kb)	chr13	41249844	41276577	26734	+	108934	uc007qfc.2	-178	ENSMUSG00000091264	Smim13	small integral membrane protein 13
1375	chr13	42049670	42049760	91	*	6.49702e-06	0.00137966	3.17357e-05	0.00134792	Promoter (2-3kb)	chr13	42052021	42185026	133006	+	110521	uc007qfk.1	-2351	ENSMUSG00000021366	Hivep1	human immunodeficiency virus type I enhancer binding protein 1
1376	chr13	43395939	43396004	66	*	0.000530242	0.940977	0.994517	-0.0536425	Promoter (2-3kb)	chr13	43398376	43401635	3260	+	70078	uc007qgb.1	-2437	ENSMUSG00000063200	Nol7	nucleolar protein 7
1377	chr13	43559872	43560106	235	*	7.3266e-08	0.00291386	3.19929e-05	0.00288392	Promoter (<=1kb)	chr13	43538406	43560191	21786	-	76137	uc007qgf.2	85	ENSMUSG00000021371	Mcur1	mitochondrial calcium uniporter regulator 1
1378	chr13	45507606	45507647	42	*	1.06528e-05	3.3687e-05	0.00232428	-0.00229086	Promoter (<=1kb)	chr13	45507469	45546381	38913	+	66355	uc007qha.1	178	ENSMUSG00000000253	Gmpr	guanosine monophosphate reductase
1379	chr13	45963618	45963643	26	*	0.00066189	0.000264844	2.9955e-05	0.000234889	Promoter (1-2kb)	chr13	45549756	45964991	415236	-	20238	uc011yyv.2	1348	ENSMUSG00000046876	Atxn1	ataxin 1
1380	chr13	45963932	45963935	4	*	0.000639705	6.09305e-05	0.00159554	-0.00153461	Promoter (1-2kb)	chr13	45549756	45964991	415236	-	20238	uc011yyv.2	1056	ENSMUSG00000046876	Atxn1	ataxin 1
1381	chr13	45963941	45964052	112	*	3.99438e-13	0.384861	0.000610076	0.384251	Promoter (<=1kb)	chr13	45549756	45964991	415236	-	20238	uc011yyv.2	939	ENSMUSG00000046876	Atxn1	ataxin 1
1382	chr13	46727922	46728017	96	*	3.50626e-13	0.384755	0.000598011	0.384167	Promoter (<=1kb)	chr13	46679902	46727849	47948	-	218210	uc007qhj.2	-73	ENSMUSG00000021374	Nup153	nucleoporin 153
1383	chr13	47043467	47043544	78	*	2.97331e-11	0.383657	0.00145885	0.382198	Promoter (<=1kb)	chr13	47043499	47085279	41781	+	218214	uc007qht.3	0	ENSMUSG00000038080	Kdm1b	lysine (K)-specific demethylase 1B
1384	chr13	48545991	48546019	29	*	2.62206e-10	0.00138128	3.07974e-05	0.00135049	Distal Intergenic	chr13	48538179	48538272	94	-	387244	uc011yzd.1	-7719	ENSMUSG00000065421	Mirlet7a-1	microRNA let7a-1
1385	chr13	48552290	48552350	61	*	1.96274e-09	0.383415	0.00365151	0.379742	Distal Intergenic	chr13	48538179	48538272	94	-	387244	uc011yzd.1	-14018	ENSMUSG00000065421	Mirlet7a-1	microRNA let7a-1
1386	chr13	49187738	49187798	61	*	8.15386e-06	0.00299817	5.38499e-05	0.00294466	Promoter (<=1kb)	chr13	49187547	49196251	8705	+	18081	uc007qiw.1	251	ENSMUSG00000037966	Ninj1	ninjurin 1
1387	chr13	49421267	49421273	7	*	4.83463e-07	3.02818e-05	0.00142301	-0.00139273	Promoter (<=1kb)	chr13	49421223	49463060	41838	+	75678	uc007qjj.2	50	ENSMUSG00000021385	Ippk	inositol 1,3,4,5,6-pentakisphosphate 2-kinase
1388	chr13	49421678	49421756	79	*	2.38848e-08	3.15808e-05	0.00265512	-0.00262356	Promoter (<=1kb)	chr13	49421614	49463060	41447	+	75678	uc033glj.1	142	ENSMUSG00000021385	Ippk	inositol 1,3,4,5,6-pentakisphosphate 2-kinase
1389	chr13	49653335	49653374	40	*	3.72407e-06	0.00400529	4.76417e-05	0.00395765	Promoter (<=1kb)	chr13	49653078	49679016	25939	+	70930	uc007qjt.2	296	ENSMUSG00000021392	Nol8	nucleolar protein 8
1390	chr13	51101454	51101547	94	*	7.56022e-08	0.00342514	3.37254e-05	0.00339415	Promoter (<=1kb)	chr13	51101547	51152562	51016	+	20729	uc007qlz.2	0	ENSMUSG00000021395	Spin1	spindlin 1
1391	chr13	51846664	51846703	40	*	3.53294e-07	0.00679686	6.10166e-05	0.00673585	Promoter (<=1kb)	chr13	51846675	51848474	1800	+	23882	uc007qmq.2	0	ENSMUSG00000021453	Gadd45g	growth arrest and DNA-damage-inducible 45 gamma
1392	chr13	52980743	52980759	17	*	7.44955e-09	0.00310721	3.51576e-05	0.00307205	Promoter (<=1kb)	chr13	52967209	52981039	13831	-	18030	uc007qni.1	280	ENSMUSG00000056749	Nfil3	nuclear factor, interleukin 3, regulated
1393	chr13	52980948	52981028	81	*	1.12763e-05	3.17548e-05	0.00186138	-0.00182933	Promoter (<=1kb)	chr13	52967209	52981039	13831	-	18030	uc007qni.1	11	ENSMUSG00000056749	Nfil3	nuclear factor, interleukin 3, regulated
1394	chr13	54468743	54468831	89	*	7.95501e-08	4.54376e-05	0.00834731	-0.00830188	Promoter (<=1kb)	chr13	54458837	54468840	10004	-	73666	uc007qod.2	9	ENSMUSG00000025872	Thoc3	THO complex 3
1395	chr13	54503749	54503900	152	*	8.43042e-07	0.37711	0.00457718	0.372533	Promoter (<=1kb)	chr13	54503805	54551290	47486	+	319719	uc007qoe.2	0	ENSMUSG00000043183	Simc1	SUMO-interacting motifs containing 1
1396	chr13	54565289	54565368	80	*	1.01771e-06	0.00243756	3.47174e-05	0.00239266	Promoter (<=1kb)	chr13	54551192	54565382	14191	-	97820	uc007qog.2	14	ENSMUSG00000025871	4833439L19Rik	RIKEN cDNA 4833439L19 gene
1397	chr13	54621793	54621834	42	*	5.22704e-06	4.67192e-05	0.00499245	-0.00494573	Promoter (<=1kb)	chr13	54621784	54644609	22826	+	76577	uc007qop.2	50	ENSMUSG00000025873	Faf2	Fas associated factor family member 2
1398	chr13	55099910	55099977	68	*	2.89477e-12	0.383123	0.000831981	0.382291	Promoter (<=1kb)	chr13	55027880	55100300	72421	-	20184	uc007qpv.2	323	ENSMUSG00000025878	Uimc1	ubiquitin interaction motif containing 1
1399	chr13	55190450	55190498	49	*	2.56502e-06	0.00434411	5.83327e-05	0.00428577	Distal Intergenic	chr13	55209782	55318325	108544	+	18193	uc007qqd.1	-19332	ENSMUSG00000021488	Nsd1	nuclear receptor-binding SET-domain protein 1
1400	chr13	55212395	55212482	88	*	2.87705e-05	0.0018803	4.2459e-05	0.00183618	Promoter (<=1kb)	chr13	55212070	55215678	3609	+	18193	uc007qqh.1	412	ENSMUSG00000021488	Nsd1	nuclear receptor-binding SET-domain protein 1
1401	chr13	55212970	55213025	56	*	0.000310057	6.3501e-05	0.00200082	-0.00193732	Promoter (<=1kb)	chr13	55213204	55318325	105122	+	18193	uc007qqj.1	-234	ENSMUSG00000021488	Nsd1	nuclear receptor-binding SET-domain protein 1
1402	chr13	55329751	55329831	81	*	0.000109104	7.074e-05	0.00310354	-0.0030328	Promoter (<=1kb)	chr13	55325168	55329730	4563	-	17121	uc007qqn.1	-21	ENSMUSG00000021485	Mxd3	Max dimerization protein 3
1403	chr13	55330039	55330102	64	*	0.000169447	3.00446e-05	0.000603766	-0.000573721	Promoter (<=1kb)	chr13	55325168	55329730	4563	-	17121	uc007qqn.1	-309	ENSMUSG00000021485	Mxd3	Max dimerization protein 3
1404	chr13	55362766	55362832	67	*	1.3524e-05	4.71581e-05	0.00411378	-0.00406656	Promoter (<=1kb)	chr13	55343833	55362783	18951	-	66890	uc007qqo.1	0	ENSMUSG00000021484	Lman2	lectin, mannose-binding 2
1405	chr13	55482740	55482782	43	*	0.000377561	0.199429	0.0128445	0.18659	Exon (uc007qrc.2/56320, exon 3 of 15)	chr13	55477681	55477776	96	-	102465569	uc033gly.1	-4964	#N/A	Mir6944	microRNA 6944
1406	chr13	55600091	55600141	51	*	0.000259779	9.63585e-05	0.00398514	-0.00388878	Promoter (<=1kb)	chr13	55600111	55608018	7908	+	218271	uc007qrt.1	0	ENSMUSG00000021504	B4galt7	xylosylprotein beta1,4-galactosyltransferase, polypeptide 7 (galactosyltransferase I)
1407	chr13	55727441	55727539	99	*	5.51284e-06	3.3235e-05	0.00225784	-0.0021685	Promoter (<=1kb)	chr13	55727368	55776830	49463	+	72562	uc007qrz.1	171	ENSMUSG00000021496	Pcbd2	pterin 4 alpha carbinolamine dehydratase/dimerization cofactor of hepatocyte nuclear factor 1 alpha (TCF1) 2
1408	chr13	55727547	55727547	1	*	3.03067e-10	0.384537	0.00165927	0.382878	Promoter (<=1kb)	chr13	55727368	55776830	49463	+	72562	uc007qrz.1	179	ENSMUSG00000021496	Pcbd2	pterin 4 alpha carbinolamine dehydratase/dimerization cofactor of hepatocyte nuclear factor 1 alpha (TCF1) 2
1409	chr13	55896882	55896882	1	*	0.00128246	0.951129	0.571591	0.379537	Distal Intergenic	chr13	55825054	55831425	6372	-	18740	uc007qsd.1	-65457	ENSMUSG00000021506	Pitx1	paired-like homeodomain transcription factor 1
1410	chr13	56032633	56032683	51	*	0.000424412	0.436711	0.0770594	0.359339	Intron (uc007qse.1/uc007qse.1, intron 2 of 2)	chr13	56073622	56135550	61929	-	26914	uc007qsf.2	102867	ENSMUSG00000015937	H2afy	H2A histone family, member Y
1411	chr13	56135245	56135310	66	*	1.44797e-05	3.23469e-05	0.00178097	-0.00174862	Promoter (<=1kb)	chr13	56073622	56135550	61929	-	26914	uc007qsf.2	240	ENSMUSG00000015937	H2afy	H2A histone family, member Y
1412	chr13	56135562	56135562	1	*	1.91699e-06	3.76446e-05	0.00544574	-0.00540809	Promoter (<=1kb)	chr13	56073622	56135550	61929	-	26914	uc007qsf.2	-12	ENSMUSG00000015937	H2afy	H2A histone family, member Y
1413	chr13	56251695	56251707	13	*	4.69146e-13	0.38188	0.00059088	0.381289	Promoter (<=1kb)	chr13	56250498	56252163	1666	-	18014	uc007qsl.2	456	ENSMUSG00000048904	Neurog1	neurogenin 1
1414	chr13	58157610	58157664	55	*	1.37245e-05	0.00463286	9.02457e-05	0.00454262	Promoter (<=1kb)	chr13	58157649	58164693	7045	+	75731	uc007qth.2	0	ENSMUSG00000050002	Idnk	idnK gluconokinase homolog (E. coli)
1415	chr13	58385339	58385370	32	*	0.000252525	6.87987e-05	0.00283875	-0.00276768	Promoter (<=1kb)	chr13	58380046	58385225	5180	-	70153	uc007qtr.2	-114	ENSMUSG00000021550	2210016F16Rik	RIKEN cDNA 2210016F16 gene
1416	chr13	58402550	58402630	81	*	4.15868e-06	0.00480846	6.89917e-05	0.00473946	Promoter (<=1kb)	chr13	58402597	58411149	8553	+	74386	uc007qub.2	0	ENSMUSG00000035367	Rmi1	RMI1, RecQ mediated genome instability 1
1417	chr13	58402779	58402797	19	*	6.08978e-12	0.38501	0.00111044	0.3839	Promoter (<=1kb)	chr13	58402597	58411149	8553	+	74386	uc007qub.2	200	ENSMUSG00000035367	Rmi1	RMI1, RecQ mediated genome instability 1
1418	chr13	58402805	58402805	1	*	2.58118e-07	3.14234e-05	0.00201329	-0.00198187	Promoter (<=1kb)	chr13	58402597	58411149	8553	+	74386	uc007qub.2	208	ENSMUSG00000035367	Rmi1	RMI1, RecQ mediated genome instability 1
1419	chr13	58402808	58402839	32	*	2.50804e-08	0.38261	0.00376936	0.378841	Promoter (<=1kb)	chr13	58402597	58411149	8553	+	74386	uc007qub.2	242	ENSMUSG00000035367	Rmi1	RMI1, RecQ mediated genome instability 1
1420	chr13	58402857	58402934	78	*	2.98962e-06	6.89392e-05	0.00523493	-0.00516599	Promoter (<=1kb)	chr13	58402597	58411149	8553	+	74386	uc007qub.2	337	ENSMUSG00000035367	Rmi1	RMI1, RecQ mediated genome instability 1
1421	chr13	58756683	58756683	1	*	0.000260074	0.897454	0.963059	-0.0656052	Intron (uc007quf.1/67585, intron 2 of 2)	chr13	58741074	58762311	21238	-	67585	uc007quf.1	5628	#N/A	4930455J16Rik	RIKEN cDNA 4930455J16 gene
1422	chr13	59769517	59769611	95	*	5.67596e-07	4.05656e-05	0.0097159	-0.00967559	Promoter (<=1kb)	chr13	59755415	59769789	14375	-	69046	uc007qvd.1	178	ENSMUSG00000044792	Isca1	iron-sulfur cluster assembly 1 homolog (S. cerevisiae)
1423	chr13	60175855	60175935	81	*	0.000579949	0.0438431	0.00374761	0.0400955	Promoter (1-2kb)	chr13	60174405	60177535	3131	-	14451	uc007qvi.2	1600	ENSMUSG00000052957	Gas1	growth arrest specific 1
1424	chr13	60602053	60602109	57	*	1.79383e-06	0.00473442	4.61935e-05	0.00469178	Promoter (<=1kb)	chr13	60602211	60763191	160981	+	69635	uc007qvo.2	-158	ENSMUSG00000021559	Dapk1	death associated protein kinase 1
1425	chr13	61130492	61130501	10	*	0.000325939	0.871836	0.958574	-0.0867374	Distal Intergenic	chr13	61159215	61164188	4974	-	56835	uc007qwe.1	33687	ENSMUSG00000055679	Ctsr	cathepsin R
1426	chr13	63272852	63272887	36	*	0.000111778	0.247694	0.0140713	0.233622	Promoter (<=1kb)	chr13	63272999	63295168	22170	+	72061	uc007qxm.1	-147	ENSMUSG00000021458	2010111I01Rik	RIKEN cDNA 2010111I01 gene
1427	chr13	64152382	64152423	42	*	7.29434e-10	0.380124	0.00185027	0.378274	Promoter (<=1kb)	chr13	64133057	64153199	20143	-	238673	uc007qyj.1	776	ENSMUSG00000044934	Zfp367	zinc finger protein 367
1428	chr13	64152836	64152891	56	*	5.67055e-07	0.0022286	3.692e-05	0.00219168	Promoter (<=1kb)	chr13	64133057	64153199	20143	-	238673	uc007qyj.1	308	ENSMUSG00000044934	Zfp367	zinc finger protein 367
1429	chr13	64153118	64153147	30	*	1.67126e-06	0.00098896	3.53776e-05	0.000953583	Promoter (<=1kb)	chr13	64133057	64153199	20143	-	238673	uc007qyj.1	52	ENSMUSG00000044934	Zfp367	zinc finger protein 367
1430	chr13	64153449	64153470	22	*	3.13766e-12	0.385245	0.000815808	0.384429	Promoter (<=1kb)	chr13	64133057	64153199	20143	-	238673	uc007qyj.1	-250	ENSMUSG00000044934	Zfp367	zinc finger protein 367
1431	chr13	64162174	64162212	39	*	2.78622e-15	0.385109	0.00027922	0.38483	Promoter (<=1kb)	chr13	64161866	64186537	24672	+	56541	uc011zaz.1	346	ENSMUSG00000021476	Habp4	hyaluronic acid binding protein 4
1432	chr13	67552976	67553014	39	*	5.29835e-07	0.356504	0.00429365	0.35221	Promoter (<=1kb)	chr13	67538641	67553152	14512	-	212276	uc007rbb.2	138	ENSMUSG00000095432	Zfp748	zinc finger protein 748
1433	chr13	69488130	69488139	10	*	2.2279e-05	0.0273275	0.0895772	-0.0622497	Distal Intergenic	chr13	69497959	69533864	35906	-	210106	uc007rch.2	45725	ENSMUSG00000034575	Papd7	PAP associated domain containing 7
1434	chr13	69611561	69611651	91	*	6.48506e-05	4.23962e-05	0.00182714	-0.00178474	Promoter (<=1kb)	chr13	69573449	69611463	38015	-	78925	uc007rck.1	-98	ENSMUSG00000021594	Srd5a1	steroid 5 alpha-reductase 1
1435	chr13	71074301	71074301	1	*	0.00395007	0.478732	0.702675	-0.223943	Distal Intergenic	chr13	71107089	71107209	121	+	100316804	uc056yue.1	-32788	ENSMUSG00000080580	Mir466f-4	microRNA 466f-4
1436	chr13	72029533	72029533	1	*	0.00168842	0.236204	0.0344849	0.201719	Distal Intergenic	chr13	71958232	71963723	5492	-	16371	uc007rdd.1	-65810	ENSMUSG00000060969	Irx1	Iroquois related homeobox 1 (Drosophila)
1437	chr13	73467413	73467499	87	*	0.000122164	3.09431e-05	0.0007489	-0.000717957	Promoter (<=1kb)	chr13	73467383	73514538	47156	+	210992	uc007rdk.1	116	ENSMUSG00000021608	Lpcat1	lysophosphatidylcholine acyltransferase 1
1438	chr13	73467558	73467641	84	*	6.33609e-09	0.376552	0.00294309	0.37379	Promoter (<=1kb)	chr13	73467383	73514538	47156	+	210992	uc007rdk.1	258	ENSMUSG00000021608	Lpcat1	lysophosphatidylcholine acyltransferase 1
1439	chr13	73603881	73603881	1	*	0.00263378	0.0189371	0.305427	-0.28649	Promoter (<=1kb)	chr13	73604002	73620639	16638	+	218335	uc007rdo.2	-121	ENSMUSG00000021610	Clptm1l	CLPTM1-like
1440	chr13	73603944	73603975	32	*	3.19213e-06	0.00096294	3.15707e-05	0.00093137	Promoter (<=1kb)	chr13	73604002	73620639	16638	+	218335	uc007rdo.2	-58	ENSMUSG00000021610	Clptm1l	CLPTM1-like
1441	chr13	73763633	73763730	98	*	1.49588e-06	3.44261e-05	0.00169169	-0.00165727	Promoter (<=1kb)	chr13	73763697	73812358	48662	+	20499	uc007reb.1	0	ENSMUSG00000017756	Slc12a7	solute carrier family 12, member 7
1442	chr13	74009230	74009280	51	*	1.71066e-05	0.00194507	4.14903e-05	0.00190358	Promoter (<=1kb)	chr13	74009419	74035753	26335	+	72948	uc007reo.2	-189	ENSMUSG00000021573	Tppp	tubulin polymerization promoting protein
1443	chr13	74010378	74010402	25	*	0.000399253	0.00467117	0.000176025	0.00449525	Promoter (<=1kb)	chr13	74009419	74035753	26335	+	72948	uc007reo.2	983	ENSMUSG00000021573	Tppp	tubulin polymerization promoting protein
1444	chr13	74808484	74808584	101	*	2.19305e-06	0.00441924	6.53241e-05	0.0043597	Promoter (<=1kb)	chr13	74693294	74808760	115467	-	12380	uc007rfq.2	176	ENSMUSG00000021585	Cast	calpastatin
1445	chr13	78198444	78198514	71	*	4.98045e-07	7.78551e-05	0.0100024	-0.00992452	Promoter (<=1kb)	chr13	78188973	78198982	10010	-	13865	uc007rhe.2	468	ENSMUSG00000069171	Nr2f1	nuclear receptor subfamily 2, group F, member 1
1446	chr13	80883222	80883269	48	*	6.41789e-05	0.000707674	3.36366e-05	0.000674037	Promoter (<=1kb)	chr13	80883422	80889643	6222	+	105171	uc007rhh.1	-200	ENSMUSG00000074794	Arrdc3	arrestin domain containing 3
1447	chr13	81783405	81783508	104	*	2.47323e-07	3.49977e-05	0.00291849	-0.00288295	Promoter (<=1kb)	chr13	81783292	81797157	13866	+	12626	uc007rid.1	216	ENSMUSG00000021537	Cetn3	centrin 3
1448	chr13	81783812	81783812	1	*	2.54028e-13	0.384629	0.00053678	0.384093	Promoter (<=1kb)	chr13	81783292	81797157	13866	+	12626	uc007rid.1	520	ENSMUSG00000021537	Cetn3	centrin 3
1449	chr13	86046784	86046836	53	*	5.89623e-05	3.98926e-05	0.00136293	-0.00132303	Promoter (<=1kb)	chr13	86044798	86046795	1998	-	12867	uc007riy.1	0	ENSMUSG00000017778	Cox7c	cytochrome c oxidase subunit VIIc
1450	chr13	88821964	88821968	5	*	0.000504063	9.26029e-05	0.00505639	-0.00496379	Promoter (<=1kb)	chr13	88821472	88978240	156769	+	13612	uc007riz.2	496	ENSMUSG00000034488	Edil3	EGF-like repeats and discoidin I-like domains 3
1451	chr13	91224008	91224092	85	*	3.22572e-06	4.71523e-05	0.00476912	-0.00472197	Promoter (<=1kb)	chr13	90935349	91223987	288639	-	66795	uc007rjr.1	-21	ENSMUSG00000021619	Atg10	autophagy related 10
1452	chr13	92530537	92530592	56	*	1.35103e-06	0.00207216	3.82255e-05	0.00203225	Promoter (<=1kb)	chr13	92487749	92530810	43062	-	218441	uc007rkq.2	218	ENSMUSG00000021706	Zfyve16	zinc finger, FYVE domain containing 16
1453	chr13	92530765	92530791	27	*	8.77725e-05	3.12514e-05	0.000909931	-0.000878679	Promoter (<=1kb)	chr13	92487749	92530810	43062	-	218441	uc007rkq.2	19	ENSMUSG00000021706	Zfyve16	zinc finger, FYVE domain containing 16
1454	chr13	92531041	92531112	72	*	3.92611e-07	4.17174e-05	0.00318117	-0.00313945	Promoter (<=1kb)	chr13	92487749	92530810	43062	-	218441	uc007rkq.2	-231	ENSMUSG00000021706	Zfyve16	zinc finger, FYVE domain containing 16
1455	chr13	92610937	92611053	117	*	7.76791e-08	0.403115	0.00374686	0.39898	Promoter (<=1kb)	chr13	92611138	92686193	75056	+	218442	uc007rks.1	-201	ENSMUSG00000021703	Serinc5	serine incorporator 5
1456	chr13	93304038	93304128	91	*	7.42399e-13	0.38423	0.000642903	0.383696	Promoter (<=1kb)	chr13	93304495	93356885	52391	+	26556	uc007rlb.3	-457	ENSMUSG00000007617	Homer1	homer homolog 1 (Drosophila)
1457	chr13	93304296	93304296	1	*	1.52442e-05	3.24299e-05	0.0017552	-0.00172277	Promoter (<=1kb)	chr13	93304495	93356885	52391	+	26556	uc007rlb.3	-199	ENSMUSG00000007617	Homer1	homer homolog 1 (Drosophila)
1458	chr13	93304309	93304402	94	*	1.82715e-11	0.384887	0.00102416	0.38387	Promoter (<=1kb)	chr13	93304495	93356885	52391	+	26556	uc007rlb.3	-186	ENSMUSG00000007617	Homer1	homer homolog 1 (Drosophila)
1459	chr13	93304557	93304568	12	*	2.70556e-06	0.00726411	6.26581e-05	0.00720145	Promoter (<=1kb)	chr13	93304495	93356885	52391	+	26556	uc007rlb.3	73	ENSMUSG00000007617	Homer1	homer homolog 1 (Drosophila)
1460	chr13	94358891	94358906	16	*	8.72391e-08	0.00621271	4.32459e-05	0.00616947	Promoter (<=1kb)	chr13	94356749	94358923	2175	-	328309	uc029scr.1	17	#N/A	Gm9776	predicted gene 9776
1461	chr13	94358985	94359032	48	*	1.86387e-07	3.11773e-05	0.00219995	-0.00216878	Promoter (<=1kb)	chr13	94358960	94566316	207357	+	11774	uc007rlv.2	72	ENSMUSG00000021686	Ap3b1	adaptor-related protein complex 3, beta 1 subunit
1462	chr13	94359196	94359297	102	*	4.61168e-06	7.4102e-05	0.00477291	-0.00469881	Promoter (<=1kb)	chr13	94358960	94566316	207357	+	11774	uc007rlv.2	337	ENSMUSG00000021686	Ap3b1	adaptor-related protein complex 3, beta 1 subunit
1463	chr13	96542285	96542307	23	*	8.56265e-05	0.00219083	5.82554e-05	0.00213257	Promoter (<=1kb)	chr13	96480689	96542485	61797	-	27015	uc007rne.1	178	ENSMUSG00000021668	Polk	polymerase (DNA directed), kappa
1464	chr13	96670895	96670895	1	*	0.00206937	0.000242985	0.00703601	-0.00679302	Promoter (<=1kb)	chr13	96648962	96670936	21975	-	15357	uc007rnm.3	41	ENSMUSG00000021670	Hmgcr	3-hydroxy-3-methylglutaryl-Coenzyme A reductase
1465	chr13	96670977	96671060	84	*	0.000163175	0.00211015	6.6077e-05	0.00204407	Promoter (<=1kb)	chr13	96648962	96670936	21975	-	15357	uc007rnm.3	-41	ENSMUSG00000021670	Hmgcr	3-hydroxy-3-methylglutaryl-Coenzyme A reductase
1466	chr13	97138194	97138234	41	*	1.19254e-07	3.2923e-05	0.00331702	-0.00328409	Promoter (<=1kb)	chr13	97137937	97168491	30555	+	320806	uc007rnx.2	297	ENSMUSG00000021666	Gfm2	G elongation factor, mitochondrial 2
1467	chr13	98694871	98694921	51	*	1.35641e-07	0.00172909	0.155338	-0.153638	Promoter (<=1kb)	chr13	98686238	98694831	8594	-	380863	uc007roy.1	-40	ENSMUSG00000052485	Tmem171	transmembrane protein 171
1468	chr13	98814969	98815221	253	*	3.70499e-05	0.000816864	3.26503e-05	0.000784372	Promoter (<=1kb)	chr13	98723406	98815449	92044	-	218503	uc033gnc.1	228	ENSMUSG00000041685	Fcho2	FCH domain only 2
1469	chr13	98815348	98815349	2	*	1.46732e-08	0.00235793	3.35866e-05	0.00232435	Promoter (<=1kb)	chr13	98723406	98815449	92044	-	218503	uc033gnc.1	100	ENSMUSG00000041685	Fcho2	FCH domain only 2
1470	chr13	98815704	98815704	1	*	2.93929e-10	0.0119641	9.11892e-05	0.0118729	Promoter (<=1kb)	chr13	98723406	98815449	92044	-	218503	uc033gnc.1	-255	ENSMUSG00000041685	Fcho2	FCH domain only 2
1471	chr13	98890399	98890601	203	*	8.12929e-07	0.00153554	3.26344e-05	0.00150124	Promoter (<=1kb)	chr13	98842081	98890998	48918	-	238799	uc007rpd.1	397	ENSMUSG00000009470	Tnpo1	transportin 1
1472	chr13	98926434	98926440	7	*	6.86141e-18	0.385184	0.000147207	0.385036	Promoter (<=1kb)	chr13	98842081	98926384	84304	-	238799	uc007rpf.1	-50	ENSMUSG00000009470	Tnpo1	transportin 1
1473	chr13	98926628	98926674	47	*	1.89831e-08	0.00261264	3.65733e-05	0.00257801	Promoter (<=1kb)	chr13	98842081	98926384	84304	-	238799	uc007rpf.1	-244	ENSMUSG00000009470	Tnpo1	transportin 1
1474	chr13	100600881	100600930	50	*	3.46661e-06	0.840096	0.992376	-0.15228	Exon (uc007rra.2/218518, exon 4 of 7)	chr13	100595957	100616944	20988	-	218518	uc007rra.2	16014	ENSMUSG00000021636	Marveld2	MARVEL (membrane-associating) domain containing 2
1475	chr13	100651052	100651093	42	*	1.18665e-10	0.00326062	3.8654e-05	0.00322196	Promoter (<=1kb)	chr13	100617164	100651061	33898	-	19356	uc007rrc.2	0	ENSMUSG00000021635	Rad17	RAD17 homolog (S. pombe)
1476	chr13	101694543	101694626	84	*	0.00041343	4.32347e-05	0.000907446	-0.000864211	Promoter (<=1kb)	chr13	101688979	101694599	5621	-	18708	uc007rru.1	0	ENSMUSG00000041417	Pik3r1	phosphatidylinositol 3-kinase, regulatory subunit, polypeptide 1 (p85 alpha)
1477	chr13	101768896	101768896	1	*	0.00169975	0.000171186	0.00527387	-0.00510268	Promoter (<=1kb)	chr13	101680761	101768217	87457	-	18708	uc007rrt.3	-679	ENSMUSG00000041417	Pik3r1	phosphatidylinositol 3-kinase, regulatory subunit, polypeptide 1 (p85 alpha)
1478	chr13	103920140	103920198	59	*	2.89039e-07	4.23559e-05	0.00301231	-0.00296995	Promoter (<=1kb)	chr13	103818786	103920586	101801	-	59079	uc007rsk.3	388	ENSMUSG00000021709	Erbb2ip	Erbb2 interacting protein
1479	chr13	103920413	103920476	64	*	3.02017e-05	0.00573224	0.000110922	0.00563048	Promoter (<=1kb)	chr13	103818786	103920586	101801	-	59079	uc007rsk.3	110	ENSMUSG00000021709	Erbb2ip	Erbb2 interacting protein
1480	chr13	103921573	103921604	32	*	3.40079e-05	0.00111787	3.67625e-05	0.00108177	Promoter (<=1kb)	chr13	103818786	103920586	101801	-	59079	uc007rsk.3	-987	ENSMUSG00000021709	Erbb2ip	Erbb2 interacting protein
1481	chr13	106936736	106936819	84	*	3.97932e-06	0.00229698	3.77563e-05	0.00226172	Promoter (<=1kb)	chr13	106794439	106936915	142477	-	76582	uc007rtx.1	96	ENSMUSG00000042590	Ipo11	importin 11
1482	chr13	111488904	111488904	1	*	4.03388e-06	0.303599	0.00375918	0.299839	Promoter (<=1kb)	chr13	111425680	111488370	62691	-	73274	uc007rvv.2	-534	ENSMUSG00000032745	Gpbp1	GC-rich promoter binding protein 1
1483	chr13	111489214	111489285	72	*	3.19595e-06	3.59547e-05	0.00186209	-0.00182614	Promoter (<=1kb)	chr13	111425680	111490041	64362	-	73274	uc007rvw.2	756	ENSMUSG00000032745	Gpbp1	GC-rich promoter binding protein 1
1484	chr13	117024694	117025025	332	*	4.18788e-05	3.36012e-05	0.00160185	-0.00156925	Promoter (<=1kb)	chr13	116854824	117025277	170454	-	52552	uc007ryi.1	252	ENSMUSG00000021725	Parp8	poly (ADP-ribose) polymerase family, member 8
1485	chr13	117025028	117025028	1	*	1.84937e-09	0.381374	0.00189769	0.379476	Promoter (<=1kb)	chr13	116854824	117025277	170454	-	52552	uc007ryi.1	249	ENSMUSG00000021725	Parp8	poly (ADP-ribose) polymerase family, member 8
1486	chr13	117025053	117025053	1	*	2.47441e-05	5.67054e-05	0.00474734	-0.00469063	Promoter (<=1kb)	chr13	116854824	117025277	170454	-	52552	uc007ryi.1	224	ENSMUSG00000021725	Parp8	poly (ADP-ribose) polymerase family, member 8
1487	chr13	118387101	118387164	64	*	9.41993e-05	2.98911e-05	0.000742208	-0.000712317	Promoter (<=1kb)	chr13	118380110	118387252	7143	-	59054	uc007ryr.1	88	ENSMUSG00000021731	Mrps30	mitochondrial ribosomal protein S30
1488	chr13	118387227	118387296	70	*	3.26049e-10	0.376844	0.00142077	0.375423	Promoter (<=1kb)	chr13	118380110	118387252	7143	-	59054	uc007ryr.1	0	ENSMUSG00000021731	Mrps30	mitochondrial ribosomal protein S30
1489	chr13	119790957	119791027	71	*	0.000658979	0.000287288	3.04957e-05	0.000256792	Promoter (<=1kb)	chr13	119765186	119791122	25937	-	72465	uc007rzn.2	95	ENSMUSG00000094870	Zfp131	zinc finger protein 131
1490	chr13	119791143	119791143	1	*	1.76423e-08	0.385216	0.00363863	0.381577	Promoter (<=1kb)	chr13	119765186	119791122	25937	-	72465	uc007rzn.2	-21	ENSMUSG00000094870	Zfp131	zinc finger protein 131
1491	chr13	119791144	119791144	1	*	8.9143e-08	3.04238e-05	0.00427369	-0.00424326	Promoter (<=1kb)	chr13	119765186	119791122	25937	-	72465	uc007rzn.2	-22	ENSMUSG00000094870	Zfp131	zinc finger protein 131
1492	chr13	119791154	119791401	248	*	5.4908e-08	0.381582	0.00397995	0.37731	Promoter (<=1kb)	chr13	119765186	119791122	25937	-	72465	uc007rzn.2	-32	ENSMUSG00000094870	Zfp131	zinc finger protein 131
1493	chr13	119791481	119791535	55	*	5.29671e-12	4.05114e-05	0.0112001	-0.0111596	Promoter (<=1kb)	chr13	119765186	119791122	25937	-	72465	uc007rzn.2	-359	ENSMUSG00000094870	Zfp131	zinc finger protein 131
1494	chr13	119962030	119962079	50	*	3.61005e-06	0.00438313	4.94801e-05	0.00433365	Distal Intergenic	chr13	119949357	119950806	1450	-	333467	uc029sdq.1	-11224	ENSMUSG00000078537	B020031M17Rik	RIKEN cDNA B020031M17 gene
1495	chr14	7488472	7488521	50	*	1.01458e-05	3.99529e-05	0.00362548	-0.00358553	Intron (uc007seb.1/uc007seb.1, intron 3 of 3)	chr14	7471005	7551894	80890	-	100041874	uc007seg.2	63373	ENSMUSG00000079364	Gm3558	predicted gene 3558
1496	chr14	7817862	7817897	36	*	0.000100145	3.08678e-05	0.000796027	-0.000765159	Promoter (<=1kb)	chr14	7817957	7882418	64462	+	286940	uc007sej.1	-95	ENSMUSG00000025278	Flnb	filamin, beta
1497	chr14	7817951	7818005	55	*	7.40944e-11	0.00451014	3.73656e-05	0.00447277	Promoter (<=1kb)	chr14	7817957	7882418	64462	+	286940	uc007sej.1	0	ENSMUSG00000025278	Flnb	filamin, beta
1498	chr14	8003157	8003218	62	*	1.682e-06	0.00262912	4.44754e-05	0.00259034	Promoter (<=1kb)	chr14	8002966	8056555	53590	+	66082	uc007sep.1	252	ENSMUSG00000025277	Abhd6	abhydrolase domain containing 6
1499	chr14	8172757	8172795	39	*	1.97424e-08	0.383639	0.00306432	0.380586	Promoter (<=1kb)	chr14	8165991	8172992	7002	-	68263	uc007sev.1	197	ENSMUSG00000021748	Pdhb	pyruvate dehydrogenase (lipoamide) beta
1500	chr14	11555102	11555134	33	*	1.2324e-08	0.00800418	8.03617e-05	0.00792394	Promoter (1-2kb)	chr14	11553553	11964131	410579	+	19270	uc007sfl.1	1581	ENSMUSG00000021745	Ptprg	protein tyrosine phosphatase, receptor type, G
1501	chr14	14702898	14702989	92	*	1.90569e-05	0.00172302	4.64434e-05	0.0016761	Promoter (<=1kb)	chr14	14703025	14775512	72488	+	218756	uc007sgn.1	-127	ENSMUSG00000021733	Slc4a7	solute carrier family 4, sodium bicarbonate cotransporter, member 7
1502	chr14	14703417	14703417	1	*	0.000132873	0.13047	0.00342933	0.127041	Promoter (<=1kb)	chr14	14703025	14775512	72488	+	218756	uc007sgn.1	392	ENSMUSG00000021733	Slc4a7	solute carrier family 4, sodium bicarbonate cotransporter, member 7
1503	chr14	14703418	14703418	1	*	0.000572345	9.14938e-05	0.0028432	-0.0027517	Promoter (<=1kb)	chr14	14703025	14775512	72488	+	218756	uc007sgn.1	393	ENSMUSG00000021733	Slc4a7	solute carrier family 4, sodium bicarbonate cotransporter, member 7
1504	chr14	14703423	14703482	60	*	2.12054e-12	0.384229	0.000784667	0.383444	Promoter (<=1kb)	chr14	14703025	14775512	72488	+	218756	uc007sgn.1	457	ENSMUSG00000021733	Slc4a7	solute carrier family 4, sodium bicarbonate cotransporter, member 7
1505	chr14	20640712	20640767	56	*	7.38494e-10	0.369136	0.00144029	0.367869	Distal Intergenic	chr14	20649102	20656540	7439	-	59011	uc007skd.1	15773	ENSMUSG00000068697	Myoz1	myozenin 1
1506	chr14	20694967	20694994	28	*	3.6583e-05	4.09993e-05	0.00189135	-0.00185035	Promoter (<=1kb)	chr14	20694968	20700197	5230	+	73068	uc007skk.1	0	ENSMUSG00000039357	Fut11	fucosyltransferase 11
1507	chr14	20695133	20695184	52	*	1.28215e-12	3.54075e-05	0.00491838	-0.00488297	Promoter (<=1kb)	chr14	20694968	20700197	5230	+	73068	uc007skk.1	216	ENSMUSG00000039357	Fut11	fucosyltransferase 11
1508	chr14	20695269	20695359	91	*	4.78032e-10	0.00359812	3.05141e-05	0.00348654	Promoter (<=1kb)	chr14	20694968	20700197	5230	+	73068	uc007skk.1	391	ENSMUSG00000039357	Fut11	fucosyltransferase 11
1509	chr14	20695661	20695781	121	*	1.30898e-07	4.69348e-05	0.00875064	-0.00870544	Promoter (<=1kb)	chr14	20694968	20700197	5230	+	73068	uc007skk.1	813	ENSMUSG00000039357	Fut11	fucosyltransferase 11
1510	chr14	20702817	20702890	74	*	1.25033e-07	3.65313e-05	0.00387289	-0.00383595	Promoter (<=1kb)	chr14	20703027	20704425	1399	+	66121	uc007skm.2	-210	ENSMUSG00000063787	Chchd1	coiled-coil-helix-coiled-coil-helix domain containing 1
1511	chr14	20760410	20760449	40	*	9.56909e-06	0.99493	0.839149	0.156213	Exon (uc007skt.2/12325, exon 11 of 21)	chr14	20723730	20734562	10833	-	17423	uc007sks.1	-25848	ENSMUSG00000039308	Ndst2	N-deacetylase/N-sulfotransferase (heparan glucosaminyl) 2
1512	chr14	20929492	20929601	110	*	0.000108605	0.000627689	3.23081e-05	0.000594088	Promoter (<=1kb)	chr14	20929433	20998781	69349	+	22330	uc007sky.1	168	ENSMUSG00000021823	Vcl	vinculin
1513	chr14	21052539	21052623	85	*	4.10004e-05	0.00156848	4.25887e-05	0.00152579	Promoter (<=1kb)	chr14	21052574	21053921	1348	+	11534	uc007slb.2	0	ENSMUSG00000039197	Adk	adenosine kinase
1514	chr14	21499708	21499831	124	*	2.63997e-05	0.00429513	7.26876e-05	0.00422373	Promoter (<=1kb)	chr14	21499770	21672478	172709	+	54169	uc029sfw.1	0	ENSMUSG00000021767	Kat6b	K(lysine) acetyltransferase 6B
1515	chr14	21500288	21500288	1	*	0.00233597	0.00791963	0.203091	-0.195171	Promoter (<=1kb)	chr14	21499785	21520304	20520	+	54169	uc007slf.2	503	ENSMUSG00000021767	Kat6b	K(lysine) acetyltransferase 6B
1516	chr14	21750724	21750793	70	*	8.02408e-08	3.23314e-05	0.00253366	-0.00250122	Promoter (<=1kb)	chr14	21750572	21798725	48154	+	67630	uc007slq.1	221	ENSMUSG00000021770	Samd8	sterile alpha motif domain containing 8
1517	chr14	21831682	21831692	11	*	1.37594e-05	0.320071	0.00656777	0.313504	Promoter (<=1kb)	chr14	21831561	21845879	14319	+	22334	uc007sls.1	131	ENSMUSG00000021771	Vdac2	voltage-dependent anion channel 2
1518	chr14	21831865	21831896	32	*	4.71461e-06	3.49555e-05	0.00298577	-0.00295082	Promoter (<=1kb)	chr14	21831561	21845879	14319	+	22334	uc007sls.1	335	ENSMUSG00000021771	Vdac2	voltage-dependent anion channel 2
1519	chr14	21986121	21986198	78	*	1.20727e-07	3.7963e-05	0.00405641	-0.00401845	Exon (uc007slv.1/218820, exon 3 of 3)	chr14	21983962	21989601	5640	-	218820	uc007slv.1	3403	ENSMUSG00000039081	Zfp503	zinc finger protein 503
1520	chr14	21987395	21987443	49	*	2.02931e-09	0.0141661	4.80958e-05	0.014118	Promoter (2-3kb)	chr14	21983962	21989601	5640	-	218820	uc007slv.1	2158	ENSMUSG00000039081	Zfp503	zinc finger protein 503
1521	chr14	21988432	21988467	36	*	2.93584e-10	0.384583	0.00160195	0.383001	Promoter (1-2kb)	chr14	21983962	21989601	5640	-	218820	uc007slv.1	1134	ENSMUSG00000039081	Zfp503	zinc finger protein 503
1522	chr14	24490770	24490847	78	*	4.74766e-07	0.00239824	3.32269e-05	0.00236502	Promoter (<=1kb)	chr14	24490681	24495858	5178	+	20088	uc007sra.1	166	ENSMUSG00000025290	Rps24	ribosomal protein S24
1523	chr14	24490997	24491042	46	*	0.000106529	0.000479805	3.03556e-05	0.000449449	Promoter (<=1kb)	chr14	24490681	24495858	5178	+	20088	uc007sra.1	361	ENSMUSG00000025290	Rps24	ribosomal protein S24
1524	chr14	27336070	27336130	61	*	0.000108441	0.0334621	0.103037	-0.0668193	Promoter (<=1kb)	chr14	27336037	27403911	67875	+	71704	uc007str.2	93	ENSMUSG00000021895	Arhgef3	Rho guanine nucleotide exchange factor (GEF) 3
1525	chr14	28511371	28511381	11	*	0.000477333	0.02199	0.00320664	0.0187834	Promoter (<=1kb)	chr14	28511405	28525515	14111	+	22418	uc007suh.2	-34	ENSMUSG00000021994	Wnt5a	wingless-type MMTV integration site family, member 5A
1526	chr14	29978342	29978477	136	*	2.11422e-07	3.28549e-05	0.0022833	-0.00224759	Promoter (<=1kb)	chr14	29978337	29993221	14885	+	56249	uc007sum.2	140	ENSMUSG00000015971	Actr8	ARP8 actin-related protein 8
1527	chr14	30625435	30625510	76	*	2.15222e-07	0.372522	0.00385639	0.368666	Promoter (<=1kb)	chr14	30595354	30626208	30855	-	18753	uc007svh.2	698	ENSMUSG00000021948	Prkcd	protein kinase C, delta
1528	chr14	30625802	30625822	21	*	9.63292e-06	3.47173e-05	0.00260241	-0.00256769	Promoter (<=1kb)	chr14	30595354	30626208	30855	-	18753	uc007svh.2	386	ENSMUSG00000021948	Prkcd	protein kinase C, delta
1529	chr14	30626012	30626012	1	*	0.00107956	0.000843911	5.5658e-05	0.000788253	Promoter (<=1kb)	chr14	30595354	30626208	30855	-	18753	uc007svh.2	196	ENSMUSG00000021948	Prkcd	protein kinase C, delta
1530	chr14	30626146	30626196	51	*	2.56468e-06	0.004425	5.64729e-05	0.00436853	Promoter (<=1kb)	chr14	30595354	30626208	30855	-	18753	uc007svh.2	12	ENSMUSG00000021948	Prkcd	protein kinase C, delta
1531	chr14	31019113	31019268	156	*	2.9733e-07	0.00404917	3.50932e-05	0.00401438	Promoter (<=1kb)	chr14	31012433	31019131	6699	-	30877	uc007swi.3	0	ENSMUSG00000042354	Gnl3	guanine nucleotide binding protein-like 3 (nucleolar)
1532	chr14	31251375	31251469	95	*	8.40485e-12	0.384694	0.000929998	0.38368	Promoter (<=1kb)	chr14	31251489	31259929	8441	+	104416	uc007sxh.1	-114	ENSMUSG00000021901	Bap1	Brca1 associated protein 1
1533	chr14	31494244	31494298	55	*	0.000129949	0.000841495	0.0365668	-0.0357362	Promoter (<=1kb)	chr14	31478798	31494977	16180	-	67011	uc007sxq.1	679	ENSMUSG00000021891	Mettl6	methyltransferase like 6
1534	chr14	31494991	31495062	72	*	4.59515e-05	0.00126475	4.15799e-05	0.00122	Promoter (<=1kb)	chr14	31478798	31494977	16180	-	67011	uc007sxq.1	-14	ENSMUSG00000021891	Mettl6	methyltransferase like 6
1535	chr14	31495345	31495347	3	*	1.65226e-15	0.00458077	3.38718e-05	0.0045469	Promoter (<=1kb)	chr14	31495079	31509858	14780	+	74427	uc007sxt.2	268	ENSMUSG00000021890	Eaf1	ELL associated factor 1
1536	chr14	31831035	31831098	64	*	5.49922e-09	0.0126481	0.000151835	0.0124963	Promoter (<=1kb)	chr14	31700015	31830415	130401	-	105522	uc007sya.1	-620	ENSMUSG00000014496	Ankrd28	ankyrin repeat domain 28
1537	chr14	32165631	32165645	15	*	1.61702e-11	0.385068	0.00100635	0.384062	Promoter (<=1kb)	chr14	32165586	32179855	14270	+	27057	uc007syl.2	59	ENSMUSG00000056234	Ncoa4	nuclear receptor coactivator 4
1538	chr14	32165662	32165744	83	*	2.05815e-06	4.06185e-05	0.00698206	-0.00693797	Promoter (<=1kb)	chr14	32165789	32179855	14067	+	27057	uc007sym.2	-127	ENSMUSG00000056234	Ncoa4	nuclear receptor coactivator 4
1539	chr14	32201886	32202009	124	*	0.00171544	0.000105012	0.00366722	-0.00356221	Promoter (<=1kb)	chr14	32201971	32209674	7704	+	26430	uc007syo.3	0	ENSMUSG00000021911	Parg	poly (ADP-ribose) glycohydrolase
1540	chr14	32202146	32202184	39	*	2.1515e-12	0.384028	0.000992721	0.383035	Promoter (<=1kb)	chr14	32201971	32209674	7704	+	26430	uc007syo.3	213	ENSMUSG00000021911	Parg	poly (ADP-ribose) glycohydrolase
1541	chr14	32513674	32513877	204	*	1.47836e-08	0.00260082	3.78174e-05	0.00256933	Promoter (<=1kb)	chr14	32513521	32542751	29231	+	319955	uc007szd.1	356	ENSMUSG00000054051	Ercc6	excision repair cross-complementing rodent repair deficiency, complementation group 6
1542	chr14	40966514	40966621	108	*	2.65221e-12	0.383229	0.00077896	0.382419	Promoter (<=1kb)	chr14	40906444	40966807	60364	-	52588	uc007tch.1	186	ENSMUSG00000037824	Tspan14	tetraspanin 14
1543	chr14	40967127	40967167	41	*	5.64277e-08	0.381974	0.00443986	0.377534	Promoter (<=1kb)	chr14	40906444	40966807	60364	-	52588	uc007tch.1	-320	ENSMUSG00000037824	Tspan14	tetraspanin 14
1544	chr14	45691013	45691026	14	*	7.45107e-05	4.74639e-05	0.00205039	-0.00200272	Distal Intergenic	chr14	45593171	45658143	64973	-	114874	uc007tgx.2	-32870	ENSMUSG00000037697	Ddhd1	DDHD domain containing 1
1545	chr14	45691106	45691106	1	*	3.42598e-05	0.00443986	7.47428e-05	0.00436511	Distal Intergenic	chr14	45593171	45658143	64973	-	114874	uc007tgx.2	-32963	ENSMUSG00000037697	Ddhd1	DDHD domain containing 1
1546	chr14	46388747	46388782	36	*	0.000463361	0.000127759	0.00430875	-0.00418099	Promoter (1-2kb)	chr14	46383520	46390599	7080	-	12159	uc007thd.2	1817	ENSMUSG00000021835	Bmp4	bone morphogenetic protein 4
1547	chr14	46883477	46883477	1	*	4.34488e-07	0.00887396	6.3124e-05	0.00881083	Promoter (<=1kb)	chr14	46882965	47105817	222853	+	74480	uc007thn.2	512	ENSMUSG00000021838	Samd4	sterile alpha motif domain containing 4
1548	chr14	46883640	46883690	51	*	5.4124e-05	3.08366e-05	0.00121939	-0.00118855	Promoter (<=1kb)	chr14	46884175	47083615	199441	+	74480	uc007thp.1	-535	ENSMUSG00000021838	Samd4	sterile alpha motif domain containing 4
1549	chr14	46884650	46884751	102	*	3.35568e-07	0.367502	0.00589581	0.361468	Promoter (<=1kb)	chr14	46884175	47083615	199441	+	74480	uc007thp.1	576	ENSMUSG00000021838	Samd4	sterile alpha motif domain containing 4
1550	chr14	47649376	47649483	108	*	8.19375e-10	0.00330396	3.73025e-05	0.00326479	Promoter (<=1kb)	chr14	47649311	47690115	40805	+	16709	uc011zjp.1	172	ENSMUSG00000021843	Ktn1	kinectin 1
1551	chr14	48367261	48367316	56	*	4.79013e-08	0.380724	0.00419281	0.376564	Distal Intergenic	chr14	48446128	48515159	69032	+	218989	uc007tjk.2	-78867	ENSMUSG00000036339	Tmem260	transmembrane protein 260
1552	chr14	50062412	50062459	48	*	9.86616e-05	4.44756e-05	0.00174285	-0.00169838	Distal Intergenic	chr14	50083714	50084679	966	-	258313	uc007tkp.1	22220	ENSMUSG00000060523	Olfr726	olfactory receptor 726
1553	chr14	50930733	50930749	17	*	5.51879e-09	0.383348	0.00317621	0.380137	Promoter (<=1kb)	chr14	50926070	50930849	4780	-	219024	uc007tma.1	100	ENSMUSG00000035953	Tmem55b	transmembrane protein 55b
1554	chr14	50931089	50931152	64	*	0.000416348	3.00977e-05	0.000385335	-0.000355232	Promoter (<=1kb)	chr14	50926070	50930851	4782	-	219024	uc007tmc.1	-238	ENSMUSG00000035953	Tmem55b	transmembrane protein 55b
1555	chr14	51913262	51913304	43	*	4.35205e-08	0.0100103	4.98661e-05	0.00996156	Promoter (<=1kb)	chr14	51905271	51913488	8218	-	29811	uc007tnk.2	184	ENSMUSG00000004558	Ndrg2	N-myc downstream regulated gene 2
1556	chr14	51984869	51984878	10	*	7.80101e-06	0.000988503	3.05477e-05	0.000958007	Promoter (<=1kb)	chr14	51984833	51988584	3752	+	268739	uc007tno.2	45	ENSMUSG00000004562	Arhgef40	Rho guanine nucleotide exchange factor (GEF) 40
1557	chr14	51984955	51984955	1	*	3.61775e-05	0.000120919	0.00579198	-0.00567106	Promoter (<=1kb)	chr14	51984833	51988584	3752	+	268739	uc007tno.2	122	ENSMUSG00000004562	Arhgef40	Rho guanine nucleotide exchange factor (GEF) 40
1558	chr14	51984981	51985013	33	*	6.94452e-08	0.364768	0.00388515	0.360883	Promoter (<=1kb)	chr14	51984833	51988584	3752	+	268739	uc007tno.2	180	ENSMUSG00000004562	Arhgef40	Rho guanine nucleotide exchange factor (GEF) 40
1559	chr14	51985023	51985023	1	*	5.66279e-06	6.0183e-05	0.0037706	-0.00371042	Promoter (<=1kb)	chr14	51984833	51988584	3752	+	268739	uc007tno.2	190	ENSMUSG00000004562	Arhgef40	Rho guanine nucleotide exchange factor (GEF) 40
1560	chr14	51985030	51985044	15	*	2.24114e-09	0.380919	0.00212381	0.378795	Promoter (<=1kb)	chr14	51984833	51988584	3752	+	268739	uc007tno.2	211	ENSMUSG00000004562	Arhgef40	Rho guanine nucleotide exchange factor (GEF) 40
1561	chr14	52014315	52014453	139	*	7.88057e-05	3.9258e-05	0.00180188	-0.00176135	Promoter (<=1kb)	chr14	52006075	52014558	8484	-	69890	uc007tnv.3	105	ENSMUSG00000049295	Zfp219	zinc finger protein 219
1562	chr14	52019995	52020187	193	*	1.11577e-07	0.00406577	3.75411e-05	0.00402823	Promoter (<=1kb)	chr14	52006075	52019713	13639	-	69890	uc007tnw.3	-282	ENSMUSG00000049295	Zfp219	zinc finger protein 219
1563	chr14	52304803	52304869	67	*	6.66973e-05	0.00148162	4.29894e-05	0.00143726	Promoter (<=1kb)	chr14	52294842	52305124	10283	-	56335	uc007tpc.1	255	ENSMUSG00000022160	Mettl3	methyltransferase like 3
1564	chr14	54253891	54253984	94	*	1.40821e-09	0.00382133	3.30182e-05	0.00372767	Promoter (<=1kb)	chr14	54235485	54253929	18445	-	13135	uc007tvm.2	0	ENSMUSG00000022174	Dad1	defender against cell death 1
1565	chr14	54360979	54361056	78	*	3.67589e-05	0.00168945	5.09156e-05	0.00163854	Promoter (<=1kb)	chr14	54360841	54364495	3655	+	69089	uc007tvt.1	215	ENSMUSG00000000959	Oxa1l	oxidase assembly 1-like
1566	chr14	54576721	54576862	142	*	0.00121781	0.0196648	0.000952763	0.018712	Promoter (<=1kb)	chr14	54567469	54577661	10193	-	16475	uc007twj.2	799	ENSMUSG00000022178	Ajuba	ajuba LIM protein
1567	chr14	54577126	54577142	17	*	3.52307e-06	0.00276033	6.59376e-05	0.0026944	Promoter (<=1kb)	chr14	54567469	54577661	10193	-	16475	uc007twj.2	519	ENSMUSG00000022178	Ajuba	ajuba LIM protein
1568	chr14	54577436	54577450	15	*	2.49155e-05	3.3216e-05	0.00158131	-0.00154809	Promoter (<=1kb)	chr14	54567469	54577661	10193	-	16475	uc007twj.2	211	ENSMUSG00000022178	Ajuba	ajuba LIM protein
1569	chr14	54577452	54577522	71	*	4.4751e-08	0.381328	0.00335427	0.377989	Promoter (<=1kb)	chr14	54567469	54577661	10193	-	16475	uc007twj.2	139	ENSMUSG00000022178	Ajuba	ajuba LIM protein
1570	chr14	54577525	54577529	5	*	3.78695e-06	3.81698e-05	0.00408237	-0.0040442	Promoter (<=1kb)	chr14	54567469	54577661	10193	-	16475	uc007twj.2	132	ENSMUSG00000022178	Ajuba	ajuba LIM protein
1571	chr14	54577534	54577534	1	*	6.11226e-08	0.381299	0.00362566	0.377674	Promoter (<=1kb)	chr14	54567469	54577661	10193	-	16475	uc007twj.2	127	ENSMUSG00000022178	Ajuba	ajuba LIM protein
1572	chr14	54617851	54617866	16	*	0.000207447	0.00331003	8.91322e-05	0.00322089	Promoter (<=1kb)	chr14	54614120	54617995	3876	-	19173	uc007twl.1	129	ENSMUSG00000022193	Psmb5	proteasome (prosome, macropain) subunit, beta type 5
1573	chr14	55094940	55094993	54	*	0.000824587	0.28295	0.0201195	0.262695	Promoter (<=1kb)	chr14	55094784	55098995	4212	+	105663	uc007tyb.2	209	ENSMUSG00000045691	Thtpa	thiamine triphosphatase
1574	chr14	55491130	55491192	63	*	2.13e-05	0.00109364	3.82592e-05	0.00105523	Promoter (<=1kb)	chr14	55491093	55508264	17172	+	268747	uc007tyo.1	99	ENSMUSG00000022211	Lrrc16b	leucine rich repeat containing 16B
1575	chr14	55491306	55491328	23	*	6.37189e-05	0.000859102	3.5028e-05	0.000824074	Promoter (<=1kb)	chr14	55491093	55508264	17172	+	268747	uc007tyo.1	235	ENSMUSG00000022211	Lrrc16b	leucine rich repeat containing 16B
1576	chr14	55491565	55491565	1	*	0.0079914	0.0317608	0.051755	-0.0199942	Promoter (<=1kb)	chr14	55491093	55508264	17172	+	268747	uc007tyo.1	472	ENSMUSG00000022211	Lrrc16b	leucine rich repeat containing 16B
1577	chr14	55540341	55540374	34	*	8.44758e-05	0.00179963	5.1537e-05	0.00174809	Promoter (<=1kb)	chr14	55540266	55543261	2996	+	74551	uc007tyw.1	108	ENSMUSG00000040618	Pck2	phosphoenolpyruvate carboxykinase 2 (mitochondrial)
1578	chr14	55542499	55542499	1	*	2.62755e-07	0.956089	0.999056	-0.0429668	Promoter (2-3kb)	chr14	55540266	55543261	2996	+	74551	uc007tyw.1	2233	ENSMUSG00000040618	Pck2	phosphoenolpyruvate carboxykinase 2 (mitochondrial)
1579	chr14	55643255	55643377	123	*	1.29576e-07	4.03483e-05	0.0072887	-0.00724816	Promoter (<=1kb)	chr14	55635966	55643371	7406	-	74140	uc007tzs.1	0	ENSMUSG00000002320	Tm9sf1	transmembrane 9 superfamily member 1
1580	chr14	55643515	55643579	65	*	0.000176637	0.00427446	0.148422	-0.144147	Promoter (<=1kb)	chr14	55635966	55643371	7406	-	74140	uc007tzs.1	-144	ENSMUSG00000002320	Tm9sf1	transmembrane 9 superfamily member 1
1581	chr14	55643585	55643586	2	*	2.25319e-07	0.378545	0.0044352	0.374109	Promoter (<=1kb)	chr14	55635966	55643371	7406	-	74140	uc007tzs.1	-214	ENSMUSG00000002320	Tm9sf1	transmembrane 9 superfamily member 1
1582	chr14	55643603	55643603	1	*	0.00217434	0.000546867	0.0173597	-0.0168128	Promoter (<=1kb)	chr14	55635966	55643806	7841	-	74140	uc007tzt.1	203	ENSMUSG00000002320	Tm9sf1	transmembrane 9 superfamily member 1
1583	chr14	55643762	55643849	88	*	7.37247e-06	0.000957651	0.0212908	-0.0201971	Promoter (<=1kb)	chr14	55635966	55643806	7841	-	74140	uc007tzt.1	0	ENSMUSG00000002320	Tm9sf1	transmembrane 9 superfamily member 1
1584	chr14	55643903	55643949	47	*	3.7824e-10	0.381131	0.00153328	0.379598	Promoter (<=1kb)	chr14	55635966	55643806	7841	-	74140	uc007tzt.1	-97	ENSMUSG00000002320	Tm9sf1	transmembrane 9 superfamily member 1
1585	chr14	55721751	55721775	25	*	2.84987e-05	0.2082	0.00393818	0.204262	Promoter (<=1kb)	chr14	55715877	55722176	6300	-	56187	uc007uai.1	401	ENSMUSG00000040472	Rabggta	Rab geranylgeranyl transferase, a subunit
1586	chr14	55722046	55722061	16	*	5.12491e-05	3.26693e-05	0.00127961	-0.00124694	Promoter (<=1kb)	chr14	55715877	55722176	6300	-	56187	uc007uai.1	115	ENSMUSG00000040472	Rabggta	Rab geranylgeranyl transferase, a subunit
1587	chr14	55722158	55722193	36	*	2.53216e-07	0.00781347	5.47513e-05	0.00775872	Promoter (<=1kb)	chr14	55715877	55722176	6300	-	56187	uc007uai.1	0	ENSMUSG00000040472	Rabggta	Rab geranylgeranyl transferase, a subunit
1588	chr14	55745671	55745788	118	*	1.53564e-05	0.00132432	3.38503e-05	0.00129033	Promoter (<=1kb)	chr14	55739020	55745684	6665	-	52585	uc007uan.2	0	ENSMUSG00000002332	Dhrs1	dehydrogenase/reductase (SDR family) member 1
1589	chr14	56571819	56571866	48	*	1.37973e-11	4.6241e-05	0.0071139	-0.00706766	Promoter (<=1kb)	chr14	56526761	56571846	45086	-	219103	uc007ucb.2	0	ENSMUSG00000064128	Cenpj	centromere protein J
1590	chr14	56777908	56777968	61	*	0.000128646	4.6727e-05	0.00150654	-0.0014557	Promoter (<=1kb)	chr14	56722449	56778316	55868	-	66645	uc007ucj.1	348	ENSMUSG00000021938	Pspc1	paraspeckle protein 1
1591	chr14	56778034	56778034	1	*	2.73262e-17	0.385122	0.000168123	0.384954	Promoter (<=1kb)	chr14	56722449	56778316	55868	-	66645	uc007ucj.1	282	ENSMUSG00000021938	Pspc1	paraspeckle protein 1
1592	chr14	56886505	56886544	40	*	3.83159e-06	0.0010766	3.42145e-05	0.00104238	Promoter (<=1kb)	chr14	56886653	56903868	17216	+	76007	uc007ucr.1	-148	ENSMUSG00000021945	Zmym2	zinc finger, MYM-type 2
1593	chr14	57525453	57525496	44	*	2.89575e-05	7.743e-05	0.00462691	-0.00452323	Promoter (<=1kb)	chr14	57524829	57543166	18338	+	239114	uc007udc.1	667	ENSMUSG00000050222	Il17d	interleukin 17D
1594	chr14	57745518	57745643	126	*	2.37625e-07	0.00239491	3.30741e-05	0.00236064	Promoter (<=1kb)	chr14	57642029	57746123	104095	-	50523	uc007udj.1	480	ENSMUSG00000021959	Lats2	large tumor suppressor 2
1595	chr14	57745820	57745845	26	*	3.88016e-05	4.3466e-05	0.00180998	-0.00176651	Promoter (<=1kb)	chr14	57642029	57746123	104095	-	50523	uc007udj.1	278	ENSMUSG00000021959	Lats2	large tumor suppressor 2
1596	chr14	57798329	57798329	1	*	6.20871e-05	3.10609e-05	0.000959737	-0.000928676	Promoter (<=1kb)	chr14	57798424	57798487	64	+	100526476	uc011zmh.1	-95	#N/A	Mir3077	microRNA 3077
1597	chr14	57798338	57798375	38	*	1.03161e-12	0.385102	0.000686892	0.384415	Promoter (<=1kb)	chr14	57798424	57798487	64	+	100526476	uc011zmh.1	-86	#N/A	Mir3077	microRNA 3077
1598	chr14	58072164	58072315	152	*	1.77608e-10	0.384159	0.00262098	0.381546	Promoter (<=1kb)	chr14	58072686	58112720	40035	+	14180	uc007udx.2	-522	ENSMUSG00000021974	Fgf9	fibroblast growth factor 9
1599	chr14	59440934	59440936	3	*	0.0025578	3.90998e-05	0.000388654	-0.000349554	Promoter (<=1kb)	chr14	59440965	59548903	107939	+	69008	uc007uek.1	-31	ENSMUSG00000021981	Cab39l	calcium binding protein 39-like
1600	chr14	60635017	60635063	47	*	5.53314e-08	3.51941e-05	0.00416713	-0.00413194	Promoter (<=1kb)	chr14	60634729	60764556	129828	+	219140	uc011zna.1	334	ENSMUSG00000021990	Spata13	spermatogenesis associated 13
1601	chr14	61037960	61038041	82	*	9.99969e-07	0.373652	0.00683884	0.366813	Promoter (<=1kb)	chr14	60963834	61037987	74154	-	29820	uc007ufi.2	0	ENSMUSG00000060548	Tnfrsf19	tumor necrosis factor receptor superfamily, member 19
1602	chr14	61557249	61557287	39	*	5.06071e-08	0.378818	0.00348195	0.375336	Promoter (<=1kb)	chr14	61534305	61556886	22582	-	66674	uc007ufx.1	-363	ENSMUSG00000021930	Spryd7	SPRY domain containing 7
1603	chr14	62837265	62837299	35	*	7.23275e-13	0.00593777	3.30217e-05	0.00590475	Promoter (<=1kb)	chr14	62837690	62927723	90034	+	268752	uc007ugx.2	-425	ENSMUSG00000014547	Wdfy2	WD repeat and FYVE domain containing 2
1604	chr14	63122711	63122799	89	*	3.92142e-07	0.0167564	8.93638e-05	0.016667	Promoter (<=1kb)	chr14	63122462	63145923	23462	+	13030	uc007uhh.2	337	ENSMUSG00000021939	Ctsb	cathepsin B
1605	chr14	63543675	63543685	11	*	0.00437206	0.0019869	0.0152012	-0.0132143	Promoter (<=1kb)	chr14	63523610	63543953	20344	-	210376	uc007uht.1	268	ENSMUSG00000035078	Mtmr9	myotubularin related protein 9
1606	chr14	63543776	63543835	60	*	7.69996e-07	0.375704	0.008407	0.366951	Promoter (<=1kb)	chr14	63523610	63543953	20344	-	210376	uc007uht.1	118	ENSMUSG00000035078	Mtmr9	myotubularin related protein 9
1607	chr14	63860434	63860541	108	*	1.64347e-09	0.00345609	3.58295e-05	0.00342063	Promoter (<=1kb)	chr14	63860312	63919859	59548	+	72400	uc007uhx.2	229	ENSMUSG00000021958	Pinx1	PIN2/TERF1 interacting, telomerase inhibitor 1
1608	chr14	64440739	64440836	98	*	2.15076e-07	0.00801288	0.000113679	0.00774541	Promoter (<=1kb)	chr14	64122621	64441026	318406	-	110265	uc007uih.2	190	ENSMUSG00000054733	Msra	methionine sulfoxide reductase A
1609	chr14	64652600	64652639	40	*	5.5962e-07	0.0115152	6.25796e-05	0.0114543	Promoter (<=1kb)	chr14	64652531	64806296	153766	+	16554	uc007uim.1	108	ENSMUSG00000060012	Kif13b	kinesin family member 13B
1610	chr14	64652829	64652866	38	*	8.82779e-07	0.000791708	0.0238516	-0.0230599	Promoter (<=1kb)	chr14	64652531	64806296	153766	+	16554	uc007uim.1	335	ENSMUSG00000060012	Kif13b	kinesin family member 13B
1611	chr14	65833513	65833566	54	*	1.35899e-05	3.2901e-05	0.00202912	-0.00199622	Promoter (<=1kb)	chr14	65819027	65833969	14943	-	71988	uc007ujp.2	403	ENSMUSG00000022034	Esco2	establishment of cohesion 1 homolog 2 (S. cerevisiae)
1612	chr14	65837614	65837634	21	*	0.00124197	0.000960157	6.14425e-05	0.000898714	Promoter (<=1kb)	chr14	65837302	65866604	29303	+	67179	uc007ujq.1	332	ENSMUSG00000022035	Ccdc25	coiled-coil domain containing 25
1613	chr14	67933188	67933265	78	*	9.24997e-05	3.1344e-05	0.00079007	-0.000758726	Promoter (<=1kb)	chr14	67751928	67933572	181645	-	68813	uc007ull.1	307	ENSMUSG00000044447	Dock5	dedicator of cytokinesis 5
1614	chr14	69707558	69707598	41	*	1.82788e-05	0.00158925	4.06774e-05	0.00154857	Promoter (<=1kb)	chr14	69697304	69707584	10281	-	71843	uc007umq.3	0	ENSMUSG00000034194	R3hcc1	R3H domain and coiled-coil containing 1
1615	chr14	70153247	70153276	30	*	7.27009e-07	0.00309622	3.31189e-05	0.0030631	Promoter (<=1kb)	chr14	70138169	70153791	15623	-	219158	uc007unf.1	515	ENSMUSG00000033712	Ccar2	cell cycle activator and apoptosis regulator 2
1616	chr14	70153314	70153329	16	*	1.32447e-05	3.29588e-05	0.00191224	-0.00187921	Promoter (<=1kb)	chr14	70138169	70153791	15623	-	219158	uc007unf.1	462	ENSMUSG00000033712	Ccar2	cell cycle activator and apoptosis regulator 2
1617	chr14	70153337	70153417	81	*	4.4526e-08	0.383287	0.00331075	0.37952	Promoter (<=1kb)	chr14	70138169	70153791	15623	-	219158	uc007unf.1	374	ENSMUSG00000033712	Ccar2	cell cycle activator and apoptosis regulator 2
1618	chr14	70153428	70153446	19	*	4.24836e-06	3.00599e-05	0.00213734	-0.00210728	Promoter (<=1kb)	chr14	70138169	70153791	15623	-	219158	uc007unf.1	345	ENSMUSG00000033712	Ccar2	cell cycle activator and apoptosis regulator 2
1619	chr14	70289468	70289573	106	*	3.42596e-09	0.381319	0.00302053	0.378299	Promoter (<=1kb)	chr14	70217865	70289497	71633	-	19057	uc007unp.2	0	ENSMUSG00000022092	Ppp3cc	protein phosphatase 3, catalytic subunit, gamma isoform
1620	chr14	70351374	70351490	117	*	1.59449e-06	0.00526707	7.39906e-05	0.00519308	Promoter (<=1kb)	chr14	70303467	70351424	47958	-	213053	uc007unt.1	0	ENSMUSG00000022094	Slc39a14	solute carrier family 39 (zinc transporter), member 14
1621	chr14	70635820	70635899	80	*	4.87509e-06	0.00381817	6.17124e-05	0.003756	Promoter (<=1kb)	chr14	70602184	70636048	33865	-	13829	uc029slq.1	149	ENSMUSG00000022099	Dmtn	dematin actin binding protein
1622	chr14	72531206	72531255	50	*	0.0015617	0.821083	0.918834	-0.0977508	Distal Intergenic	chr14	72537953	72556359	18407	-	319448	uc011zog.1	25104	ENSMUSG00000033487	Fndc3a	fibronectin type III domain containing 3A
1623	chr14	73132050	73132050	1	*	0.00149295	0.78502	0.961019	-0.176	Distal Intergenic	chr14	73142510	73184054	41545	+	105670	uc007upj.2	-10460	ENSMUSG00000022106	Rcbtb2	regulator of chromosome condensation (RCC1) and BTB (POZ) domain containing protein 2
1624	chr14	75829601	75829644	44	*	0.000371008	0.0125634	0.000318863	0.0122628	Distal Intergenic	chr14	75842918	75844964	2047	-	100043189	uc029sly.1	15320	#N/A	Gm4285	predicted gene 4285
1625	chr14	75844918	75845019	102	*	1.19676e-10	0.381997	0.00112962	0.380867	Promoter (<=1kb)	chr14	75842918	75844964	2047	-	100043189	uc029sly.1	0	#N/A	Gm4285	predicted gene 4285
1626	chr14	75845125	75845125	1	*	3.12166e-05	6.14246e-05	0.00556934	-0.00550792	Promoter (<=1kb)	chr14	75845256	75848303	3048	+	22070	uc007uqz.2	-131	ENSMUSG00000060126	Tpt1	tumor protein, translationally-controlled 1
1627	chr14	75845342	75845412	71	*	8.21739e-08	0.00282905	3.7111e-05	0.00279194	Promoter (<=1kb)	chr14	75845256	75848303	3048	+	22070	uc007uqz.2	156	ENSMUSG00000060126	Tpt1	tumor protein, translationally-controlled 1
1628	chr14	75845557	75845791	235	*	5.20255e-07	0.00247216	4.90297e-05	0.00242337	Promoter (<=1kb)	chr14	75845256	75848303	3048	+	22070	uc007uqz.2	535	ENSMUSG00000060126	Tpt1	tumor protein, translationally-controlled 1
1629	chr14	75846038	75846097	60	*	8.439e-05	0.00110969	3.99697e-05	0.00106972	Promoter (<=1kb)	chr14	75845256	75848303	3048	+	22070	uc007uqz.2	841	ENSMUSG00000060126	Tpt1	tumor protein, translationally-controlled 1
1630	chr14	76556348	76556348	1	*	8.11158e-12	0.385077	0.000914127	0.384163	Promoter (<=1kb)	chr14	76532812	76556687	23876	-	72661	uc011zor.1	339	ENSMUSG00000052584	Serp2	stress-associated endoplasmic reticulum protein family member 2
1631	chr14	76556356	76556362	7	*	4.85027e-06	3.08038e-05	0.00236223	-0.00233142	Promoter (<=1kb)	chr14	76532812	76556687	23876	-	72661	uc011zor.1	325	ENSMUSG00000052584	Serp2	stress-associated endoplasmic reticulum protein family member 2
1632	chr14	76556365	76556411	47	*	1.66177e-08	0.384473	0.00310406	0.381315	Promoter (<=1kb)	chr14	76532812	76556687	23876	-	72661	uc011zor.1	276	ENSMUSG00000052584	Serp2	stress-associated endoplasmic reticulum protein family member 2
1633	chr14	78536641	78536717	77	*	2.279e-06	0.00485851	0.000145311	0.0047132	Promoter (<=1kb)	chr14	78492246	78536860	44615	-	219181	uc007usi.2	143	ENSMUSG00000022016	Akap11	A kinase (PRKA) anchor protein 11
1634	chr14	78732162	78732179	18	*	0.000108248	3.48726e-05	0.00102361	-0.000988735	Distal Intergenic	chr14	78569609	78725089	155481	-	380921	uc007uso.1	-7073	ENSMUSG00000034731	Dgkh	diacylglycerol kinase, eta
1635	chr14	79300851	79300944	94	*	1.72992e-05	6.46753e-05	0.0063142	-0.00624377	Promoter (<=1kb)	chr14	79288750	79301635	12886	-	66214	uc007ust.1	691	ENSMUSG00000022018	Rgcc	regulator of cell cycle
1636	chr14	79301752	79301808	57	*	9.22678e-06	0.000107411	0.00549925	-0.0053921	Promoter (<=1kb)	chr14	79288750	79301635	12886	-	66214	uc007ust.1	-117	ENSMUSG00000022018	Rgcc	regulator of cell cycle
1637	chr14	79771635	79771636	2	*	0.000588408	0.00649353	0.0487644	-0.0422709	Promoter (<=1kb)	chr14	79766772	79771312	4541	-	18530	uc007uti.3	-323	ENSMUSG00000036422	Pcdh8	protocadherin 8
1638	chr14	87417254	87417384	131	*	2.4466e-07	0.00341241	3.87389e-05	0.00337368	Promoter (<=1kb)	chr14	87416583	87515192	98610	+	219249	uc007uuf.3	801	ENSMUSG00000022019	Tdrd3	tudor domain containing 3
1639	chr14	87647892	87647892	1	*	0.000296681	0.920862	0.856747	0.064115	Distal Intergenic	chr14	87416583	87515192	98610	+	219249	uc007uuf.3	231309	ENSMUSG00000022019	Tdrd3	tudor domain containing 3
1640	chr14	99298454	99298504	51	*	3.44072e-08	3.30118e-05	0.00441803	-0.00438502	Promoter (<=1kb)	chr14	99298691	99305331	6641	+	12224	uc007uvf.1	-237	ENSMUSG00000005148	Klf5	Kruppel-like factor 5
1641	chr14	100285241	100285241	1	*	0.000295458	0.00486939	0.196478	-0.191609	Distal Intergenic	chr14	99870640	100149795	279156	-	16597	uc007uvh.2	-135446	ENSMUSG00000072294	Klf12	Kruppel-like factor 12
1642	chr14	101729583	101729597	15	*	2.05746e-10	0.375604	0.00175101	0.373853	Promoter (<=1kb)	chr14	101729928	101934693	204766	+	380928	uc007uvx.2	-345	ENSMUSG00000033060	Lmo7	LIM domain only 7
1643	chr14	101729822	101729890	69	*	2.28848e-11	0.0129447	7.86483e-05	0.012866	Promoter (<=1kb)	chr14	101729928	101934693	204766	+	380928	uc007uvx.2	-106	ENSMUSG00000033060	Lmo7	LIM domain only 7
1644	chr14	103346113	103346188	76	*	3.59733e-05	0.00192673	4.42231e-05	0.0018825	Promoter (<=1kb)	chr14	103113411	103346800	233390	-	105689	uc007uwl.1	612	ENSMUSG00000033004	Mycbp2	MYC binding protein 2
1645	chr14	104522400	104522518	119	*	3.77004e-07	0.00365562	4.09713e-05	0.00361465	Promoter (<=1kb)	chr14	104477534	104522666	45133	-	72486	uc007uxc.1	148	ENSMUSG00000022120	Rnf219	ring finger protein 219
1646	chr14	105258705	105258800	96	*	6.56989e-05	2.99055e-05	0.000872227	-0.000842321	Promoter (<=1kb)	chr14	105258673	105294944	36272	+	76273	uc007uxp.2	127	ENSMUSG00000053253	Ndfip2	Nedd4 family interacting protein 2
1647	chr14	105896934	105896983	50	*	2.55986e-05	3.0823e-05	0.00133551	-0.00130468	Promoter (<=1kb)	chr14	105891947	105896819	4873	-	24064	uc007uxy.2	-115	ENSMUSG00000022114	Spry2	sprouty homolog 2 (Drosophila)
1648	chr14	115041597	115041640	44	*	1.53611e-05	0.000933509	3.06859e-05	0.00090282	Promoter (2-3kb)	chr14	115043671	115043754	84	+	723905	uc011zpt.1	-2074	ENSMUSG00000065508	Mir17	microRNA 17
1649	chr14	115041704	115041704	1	*	7.20635e-06	0.00819477	0.427175	-0.41898	Promoter (1-2kb)	chr14	115043671	115043754	84	+	723905	uc011zpt.1	-1967	ENSMUSG00000065508	Mir17	microRNA 17
1650	chr14	115041775	115041793	19	*	7.13927e-07	0.00327507	4.34466e-05	0.00323122	Promoter (1-2kb)	chr14	115043671	115043754	84	+	723905	uc011zpt.1	-1896	ENSMUSG00000065508	Mir17	microRNA 17
1651	chr14	115041896	115041978	83	*	0.00183494	0.000145413	0.00303935	-0.0029005	Promoter (1-2kb)	chr14	115043671	115043754	84	+	723905	uc011zpt.1	-1775	ENSMUSG00000065508	Mir17	microRNA 17
1652	chr14	115042131	115042261	131	*	2.59489e-06	3.10762e-05	0.000904884	-0.000873808	Promoter (1-2kb)	chr14	115043671	115043754	84	+	723905	uc011zpt.1	-1540	ENSMUSG00000065508	Mir17	microRNA 17
1653	chr14	118180303	118180336	34	*	5.39598e-06	3.89351e-05	0.00403565	-0.00399671	Distal Intergenic	chr14	118137127	118164232	27106	+	58245	uc007uyq.2	43209	ENSMUSG00000022131	Gpr180	G protein-coupled receptor 180
1654	chr14	118664983	118665025	43	*	0.000109137	0.872876	0.813553	0.0593232	Intron (uc011zpz.1/239273, intron 28 of 30)	chr14	118482692	118676931	194240	-	239273	uc011zpz.1	11906	ENSMUSG00000032849	Abcc4	ATP-binding cassette, sub-family C (CFTR/MRP), member 4
1655	chr14	118854678	118854678	1	*	7.8451e-11	0.372682	0.00116011	0.371522	Promoter (<=1kb)	chr14	118854950	118874525	19576	+	58187	uc007uyx.2	-272	ENSMUSG00000022132	Cldn10	claudin 10
1656	chr14	118937637	118937737	101	*	1.3913e-05	6.33984e-05	0.00680402	-0.00674062	Promoter (<=1kb)	chr14	118937932	118981702	43771	+	100037258	uc007uzd.2	-295	ENSMUSG00000022136	Dnajc3	DnaJ (Hsp40) homolog, subfamily C, member 3
1657	chr14	118937975	118937994	20	*	0.000126027	0.00228826	6.40417e-05	0.00222219	Promoter (<=1kb)	chr14	118937932	118981702	43771	+	100037258	uc007uzd.2	62	ENSMUSG00000022136	Dnajc3	DnaJ (Hsp40) homolog, subfamily C, member 3
1658	chr14	118938424	118938449	26	*	4.52974e-06	4.30803e-05	0.00532904	-0.00528596	Promoter (<=1kb)	chr14	118937932	118981702	43771	+	100037258	uc007uzd.2	517	ENSMUSG00000022136	Dnajc3	DnaJ (Hsp40) homolog, subfamily C, member 3
1659	chr14	120148748	120148810	63	*	9.65278e-05	0.833619	0.615426	0.219589	Intron (uc007uzp.1/uc007uzp.1, intron 7 of 8)	chr14	120019585	120042435	22851	-	239283	uc007uzo.1	-106313	ENSMUSG00000044819	Oxgr1	oxoglutarate (alpha-ketoglutarate) receptor 1
1660	chr14	122181638	122181693	56	*	5.34948e-07	0.364024	0.00436285	0.359633	Promoter (<=1kb)	chr14	122181694	122402234	220541	+	69634	uc007vax.2	-56	ENSMUSG00000025545	Clybl	citrate lyase beta like
1661	chr14	122464530	122464624	95	*	2.62141e-06	0.370752	0.0115593	0.359192	Promoter (1-2kb)	chr14	122459160	122465658	6499	-	65100	uc007vbb.2	1034	ENSMUSG00000041703	Zic5	zinc finger protein of the cerebellum 5
1662	chr14	122464630	122464630	1	*	1.48718e-05	0.000331689	0.0149992	-0.0146675	Promoter (1-2kb)	chr14	122459160	122465658	6499	-	65100	uc007vbb.2	1028	ENSMUSG00000041703	Zic5	zinc finger protein of the cerebellum 5
1663	chr15	3995670	3995727	58	*	4.73889e-09	0.0027439	3.29434e-05	0.00271096	Promoter (<=1kb)	chr15	3982035	3995752	13718	-	106064	uc007vch.1	25	ENSMUSG00000041935	AW549877	expressed sequence AW549877
1664	chr15	4026940	4026950	11	*	2.23871e-07	0.384035	0.00572777	0.378307	Promoter (<=1kb)	chr15	4020111	4027406	7296	-	414066	uc011zqt.1	456	#N/A	BC037032	cDNA Sequence BC037032
1665	chr15	4026970	4026973	4	*	3.00354e-08	3.40679e-05	0.00554015	-0.00550609	Promoter (<=1kb)	chr15	4020111	4027406	7296	-	414066	uc011zqt.1	433	#N/A	BC037032	cDNA Sequence BC037032
1666	chr15	4026978	4027027	50	*	1.85982e-08	0.382892	0.00361986	0.37859	Promoter (<=1kb)	chr15	4020111	4027406	7296	-	414066	uc011zqt.1	379	#N/A	BC037032	cDNA Sequence BC037032
1667	chr15	4375683	4375751	69	*	9.717e-09	0.384035	0.00231232	0.381642	Promoter (<=1kb)	chr15	4375491	4520414	144924	+	239318	uc007vcm.1	260	ENSMUSG00000049148	Plcxd3	phosphatidylinositol-specific phospholipase C, X domain containing 3
1668	chr15	5143765	5143872	108	*	6.13708e-05	2.98408e-05	0.000790592	-0.000760845	Promoter (<=1kb)	chr15	5143861	5181899	38039	+	105787	uc007vct.1	0	ENSMUSG00000050697	Prkaa1	protein kinase, AMP-activated, alpha 1 catalytic subunit
1669	chr15	5144206	5144285	80	*	2.82956e-09	0.0133694	5.24588e-05	0.0133237	Promoter (<=1kb)	chr15	5143861	5181899	38039	+	105787	uc007vct.1	424	ENSMUSG00000050697	Prkaa1	protein kinase, AMP-activated, alpha 1 catalytic subunit
1670	chr15	6707667	6707789	123	*	1.33163e-07	0.00130874	3.27334e-05	0.00127587	Promoter (<=1kb)	chr15	6708381	6758615	50235	+	78757	uc007vdn.2	-714	ENSMUSG00000050310	Rictor	RPTOR independent companion of MTOR, complex 2
1671	chr15	6707914	6707949	36	*	0.000159901	3.14174e-05	0.000743235	-0.000711818	Promoter (<=1kb)	chr15	6708381	6758615	50235	+	78757	uc007vdn.2	-467	ENSMUSG00000050310	Rictor	RPTOR independent companion of MTOR, complex 2
1672	chr15	8579580	8579580	1	*	7.43945e-07	0.452918	0.593808	-0.14089	Distal Intergenic	chr15	8634124	8651506	17383	-	20512	uc007vex.1	71926	ENSMUSG00000005360	Slc1a3	solute carrier family 1 (glial high affinity glutamate transporter), member 3
1673	chr15	10470019	10470095	77	*	1.12889e-12	0.384457	0.000712182	0.383744	Promoter (<=1kb)	chr15	10446763	10470516	23754	-	78244	uc007vgc.2	421	ENSMUSG00000044224	Dnajc21	DnaJ (Hsp40) homolog, subfamily C, member 21
1674	chr15	10470140	10470182	43	*	2.00059e-06	3.09972e-05	0.00117159	-0.00114042	Promoter (<=1kb)	chr15	10446763	10470516	23754	-	78244	uc007vgc.2	334	ENSMUSG00000044224	Dnajc21	DnaJ (Hsp40) homolog, subfamily C, member 21
1675	chr15	10470513	10470539	27	*	3.52451e-17	0.384058	0.000172998	0.38387	Promoter (<=1kb)	chr15	10446763	10470516	23754	-	78244	uc007vgc.2	0	ENSMUSG00000044224	Dnajc21	DnaJ (Hsp40) homolog, subfamily C, member 21
1676	chr15	11906126	11906185	60	*	5.6151e-06	0.00386431	6.15329e-05	0.00380278	Promoter (<=1kb)	chr15	11906525	11907390	866	+	381002	uc007vhh.1	-399	#N/A	Gm5144	predicted gene 5144
1677	chr15	12117967	12117967	1	*	9.64055e-13	0.383257	0.000612827	0.382644	Promoter (<=1kb)	chr15	12117851	12185449	67599	+	22763	uc007vhk.3	116	ENSMUSG00000022201	Zfr	zinc finger RNA binding protein
1678	chr15	12117994	12118105	112	*	0.00024934	3.00772e-05	0.000881628	-0.000851551	Promoter (<=1kb)	chr15	12117851	12185449	67599	+	22763	uc007vhk.3	254	ENSMUSG00000022201	Zfr	zinc finger RNA binding protein
1679	chr15	12118423	12118423	1	*	0.00030297	0.00305376	0.00011006	0.0029437	Promoter (<=1kb)	chr15	12117851	12185449	67599	+	22763	uc007vhk.3	572	ENSMUSG00000022201	Zfr	zinc finger RNA binding protein
1680	chr15	12118635	12118703	69	*	0.00040376	3.20212e-05	0.000520669	-0.000488648	Promoter (<=1kb)	chr15	12117851	12185449	67599	+	22763	uc007vhk.3	852	ENSMUSG00000022201	Zfr	zinc finger RNA binding protein
1681	chr15	12118710	12118710	1	*	0.00078591	0.106558	0.00298928	0.103568	Promoter (<=1kb)	chr15	12117851	12185449	67599	+	22763	uc007vhk.3	859	ENSMUSG00000022201	Zfr	zinc finger RNA binding protein
1682	chr15	12190149	12190149	1	*	0.000281376	0.802085	0.987573	-0.185488	Distal Intergenic	chr15	12205094	12272240	67147	+	268783	uc007vhl.1	-14945	ENSMUSG00000039458	Mtmr12	myotubularin related protein 12
1683	chr15	12205034	12205073	40	*	4.59784e-06	0.00119189	3.07241e-05	0.00116117	Promoter (<=1kb)	chr15	12205094	12272240	67147	+	268783	uc007vhl.1	-60	ENSMUSG00000039458	Mtmr12	myotubularin related protein 12
1684	chr15	12205268	12205293	26	*	0.000110096	0.00402746	0.000104314	0.00392315	Promoter (<=1kb)	chr15	12205094	12272240	67147	+	268783	uc007vhl.1	199	ENSMUSG00000039458	Mtmr12	myotubularin related protein 12
1685	chr15	12205435	12205465	31	*	6.89915e-05	0.000186533	0.0172381	-0.0170516	Promoter (<=1kb)	chr15	12205094	12272240	67147	+	268783	uc007vhl.1	371	ENSMUSG00000039458	Mtmr12	myotubularin related protein 12
1686	chr15	12205505	12205506	2	*	1.23003e-08	0.378065	0.00249732	0.375568	Promoter (<=1kb)	chr15	12205094	12272240	67147	+	268783	uc007vhl.1	412	ENSMUSG00000039458	Mtmr12	myotubularin related protein 12
1687	chr15	12205527	12205528	2	*	0.000109018	4.34058e-05	0.00174782	-0.00170441	Promoter (<=1kb)	chr15	12205094	12272240	67147	+	268783	uc007vhl.1	434	ENSMUSG00000039458	Mtmr12	myotubularin related protein 12
1688	chr15	12205533	12205556	24	*	8.3056e-11	0.380222	0.00110406	0.379118	Promoter (<=1kb)	chr15	12205094	12272240	67147	+	268783	uc007vhl.1	462	ENSMUSG00000039458	Mtmr12	myotubularin related protein 12
1689	chr15	12321473	12321479	7	*	4.13743e-09	2.96739e-05	0.00463689	-0.00460722	Promoter (<=1kb)	chr15	12321496	12343309	21814	+	66629	uc007vhn.1	-23	ENSMUSG00000022200	Golph3	golgi phosphoprotein 3
1690	chr15	12321789	12321839	51	*	9.72928e-05	0.000665187	3.37706e-05	0.000631417	Promoter (<=1kb)	chr15	12321496	12343309	21814	+	66629	uc007vhn.1	343	ENSMUSG00000022200	Golph3	golgi phosphoprotein 3
1691	chr15	23168394	23168395	2	*	0.000364516	0.851543	0.907965	-0.0564223	Intron (uc007viq.1/320865, intron 1 of 5)	chr15	23036463	23446414	409952	+	320865	uc007vir.1	131932	ENSMUSG00000040420	Cdh18	cadherin 18
1692	chr15	25984497	25984596	100	*	1.9597e-11	3.42036e-05	0.00755306	-0.00752003	Promoter (<=1kb)	chr15	25984366	25990464	6099	+	52521	uc007vjj.1	230	ENSMUSG00000052253	Zfp622	zinc finger protein 622
1693	chr15	25984912	25984914	3	*	0.000333708	3.00167e-05	0.000494039	-0.000464023	Promoter (<=1kb)	chr15	25984366	25990464	6099	+	52521	uc007vjj.1	548	ENSMUSG00000052253	Zfp622	zinc finger protein 622
1694	chr15	25985106	25985106	1	*	0.000240173	0.000116088	0.00361888	-0.00350279	Promoter (<=1kb)	chr15	25984366	25990464	6099	+	52521	uc007vjj.1	740	ENSMUSG00000052253	Zfp622	zinc finger protein 622
1695	chr15	25985180	25985180	1	*	8.3268e-10	0.378099	0.0016544	0.376444	Promoter (<=1kb)	chr15	25984366	25990464	6099	+	52521	uc007vjj.1	814	ENSMUSG00000052253	Zfp622	zinc finger protein 622
1696	chr15	26309510	26309560	51	*	0.00178302	0.0269035	0.00402178	0.0228818	Promoter (<=1kb)	chr15	26309072	26312371	3300	+	211147	uc007vjl.2	488	ENSMUSG00000022269	March11	membrane-associated ring finger (C3HC4) 11
1697	chr15	26478295	26478295	1	*	0.00127976	0.828379	0.977829	-0.14945	Distal Intergenic	chr15	26309072	26312371	3300	+	211147	uc007vjl.2	169223	ENSMUSG00000022269	March11	membrane-associated ring finger (C3HC4) 11
1698	chr15	28025242	28025401	160	*	3.40601e-05	0.00162445	4.1693e-05	0.00158275	Promoter (<=1kb)	chr15	27730649	28025848	295200	-	223435	uc007vjw.1	447	ENSMUSG00000022263	Trio	triple functional domain (PTPRF interacting)
1699	chr15	28025502	28025508	7	*	3.38239e-08	0.00657234	5.31739e-05	0.00651916	Promoter (<=1kb)	chr15	27730649	28025848	295200	-	223435	uc007vjw.1	340	ENSMUSG00000022263	Trio	triple functional domain (PTPRF interacting)
1700	chr15	28025563	28025581	19	*	5.96702e-08	2.97277e-05	0.0028793	-0.00284957	Promoter (<=1kb)	chr15	27730649	28025848	295200	-	223435	uc007vjw.1	267	ENSMUSG00000022263	Trio	triple functional domain (PTPRF interacting)
1701	chr15	31224433	31224654	222	*	6.21643e-05	0.13096	0.00440326	0.123437	Promoter (<=1kb)	chr15	31224385	31274338	49954	+	223453	uc007vkc.2	269	ENSMUSG00000039168	Dap	death-associated protein
1702	chr15	33966722	33966742	21	*	0.000454577	0.829128	0.652444	0.176684	Distal Intergenic	chr15	34082719	34101246	18528	+	67154	uc007vlf.2	-115997	ENSMUSG00000022255	Mtdh	metadherin
1703	chr15	36174307	36174339	33	*	2.57514e-06	0.374071	0.0109794	0.363074	Promoter (<=1kb)	chr15	36174010	36177012	3003	+	17749	uc007vml.2	329	ENSMUSG00000045996	Polr2k	polymerase (RNA) II (DNA directed) polypeptide K
1704	chr15	36793119	36793227	109	*	1.19372e-06	0.00477353	5.83766e-05	0.00470475	Promoter (1-2kb)	chr15	36770262	36794538	24277	-	22631	uc007vmz.2	1311	ENSMUSG00000022285	Ywhaz	tyrosine 3-monooxygenase/tryptophan 5-monooxygenase activation protein, zeta polypeptide
1705	chr15	38473852	38473902	51	*	5.51808e-07	4.62227e-05	0.00459896	-0.00455274	Distal Intergenic	chr15	38490473	38490547	75	-	102465574	uc033gto.1	16645	#N/A	Mir6951	microRNA 6951
1706	chr15	39197398	39197473	76	*	8.45858e-11	4.28935e-05	0.00561576	-0.00557471	Promoter (<=1kb)	chr15	39198286	39684372	486087	+	116838	uc007vod.2	-888	ENSMUSG00000037386	Rims2	regulating synaptic membrane exocytosis 2
1707	chr15	39722044	39722044	1	*	0.00186249	0.629014	0.944008	-0.314994	Distal Intergenic	chr15	39745930	39760938	15009	+	75766	uc007voi.2	-23886	ENSMUSG00000022303	Dcstamp	dentrocyte expressed seven transmembrane protein
1708	chr15	39943223	39943285	63	*	2.16469e-09	0.381365	0.00350925	0.377856	Promoter (<=1kb)	chr15	39870603	39943757	73155	-	239393	uc007vom.1	472	ENSMUSG00000022305	Lrp12	low density lipoprotein-related protein 12
1709	chr15	39943401	39943571	171	*	6.88464e-13	3.17066e-05	0.00536533	-0.00533362	Promoter (<=1kb)	chr15	39870603	39943757	73155	-	239393	uc007vom.1	186	ENSMUSG00000022305	Lrp12	low density lipoprotein-related protein 12
1710	chr15	53345132	53345237	106	*	0.000182537	0.00810495	0.000174605	0.00793034	Promoter (<=1kb)	chr15	53068261	53346183	277923	-	14042	uc007vrh.2	946	ENSMUSG00000061731	Ext1	exostoses (multiple) 1
1711	chr15	53346201	53346210	10	*	0.000190981	0.000246932	0.0133356	-0.0130887	Promoter (<=1kb)	chr15	53068261	53346183	277923	-	14042	uc007vrh.2	-18	ENSMUSG00000061731	Ext1	exostoses (multiple) 1
1712	chr15	53346334	53346489	156	*	8.93327e-12	0.383102	0.000615985	0.382177	Promoter (<=1kb)	chr15	53068261	53346183	277923	-	14042	uc007vrh.2	-151	ENSMUSG00000061731	Ext1	exostoses (multiple) 1
1713	chr15	57693737	57693753	17	*	0.000199483	0.000216732	0.00620867	-0.00599193	Promoter (<=1kb)	chr15	57694667	57839832	145166	+	387609	uc007vsp.1	-930	ENSMUSG00000071757	Zhx2	zinc fingers and homeoboxes 2
1714	chr15	58134540	58134605	66	*	8.98617e-05	0.00731002	0.000135036	0.00717498	Promoter (<=1kb)	chr15	58094047	58135082	41036	-	70472	uc007vtf.1	477	ENSMUSG00000022360	Atad2	ATPase family, AAA domain containing 2
1715	chr15	61985365	61985425	61	*	2.97699e-05	3.75886e-05	0.001689	-0.00165141	Promoter (<=1kb)	chr15	61985341	61990361	5021	+	17869	uc007vyg.2	84	ENSMUSG00000022346	Myc	myelocytomatosis oncogene
1716	chr15	61986968	61986970	3	*	5.84192e-05	0.00549964	0.000106182	0.00539346	Promoter (<=1kb)	chr15	61987422	61990361	2940	+	17869	uc007vyi.1	-454	ENSMUSG00000022346	Myc	myelocytomatosis oncogene
1717	chr15	63997644	63997713	70	*	4.65832e-09	0.381478	0.00291062	0.378582	Promoter (<=1kb)	chr15	63929094	63997969	68876	-	223601	uc007vze.2	256	ENSMUSG00000022378	Fam49b	family with sequence similarity 49, member B
1718	chr15	64382857	64382857	1	*	0.000346462	2.98405e-05	0.000451279	-0.000421438	Promoter (<=1kb)	chr15	64086840	64382919	296080	-	13196	uc007vzk.2	62	ENSMUSG00000022377	Asap1	ArfGAP with SH3 domain, ankyrin repeat and PH domain1
1719	chr15	64382871	64382884	14	*	6.54121e-14	0.3853	0.000479742	0.38481	Promoter (<=1kb)	chr15	64086840	64382919	296080	-	13196	uc007vzk.2	35	ENSMUSG00000022377	Asap1	ArfGAP with SH3 domain, ankyrin repeat and PH domain1
1720	chr15	64382893	64382964	72	*	1.89665e-06	3.17522e-05	0.00213276	-0.00210101	Promoter (<=1kb)	chr15	64086840	64382919	296080	-	13196	uc007vzk.2	0	ENSMUSG00000022377	Asap1	ArfGAP with SH3 domain, ankyrin repeat and PH domain1
1721	chr15	65787124	65787185	62	*	1.21686e-06	0.00253619	4.17466e-05	0.00249777	Promoter (<=1kb)	chr15	65787041	65791351	4311	+	76740	uc007vzq.1	144	ENSMUSG00000015002	Efr3a	EFR3 homolog A (S. cerevisiae)
1722	chr15	65787571	65787582	12	*	1.16405e-06	0.00541454	8.35459e-05	0.00533027	Promoter (<=1kb)	chr15	65787041	65791351	4311	+	76740	uc007vzq.1	541	ENSMUSG00000015002	Efr3a	EFR3 homolog A (S. cerevisiae)
1723	chr15	67176063	67176063	1	*	0.000217779	0.00639187	0.267037	-0.260645	Promoter (<=1kb)	chr15	67102875	67176882	74008	-	20442	uc007wba.1	819	ENSMUSG00000013846	St3gal1	ST3 beta-galactoside alpha-2,3-sialyltransferase 1
1724	chr15	67176120	67176196	77	*	7.63518e-06	0.00150142	3.31263e-05	0.00146739	Promoter (<=1kb)	chr15	67102875	67176882	74008	-	20442	uc007wba.1	686	ENSMUSG00000013846	St3gal1	ST3 beta-galactoside alpha-2,3-sialyltransferase 1
1725	chr15	68363031	68363126	96	*	3.91992e-81	3.27024e-05	0.0145141	-0.0144814	Distal Intergenic	chr15	68341208	68341289	82	-	387228	uc011ztq.1	-21742	ENSMUSG00000065437	Mir30d	microRNA 30d
1726	chr15	68363421	68363459	39	*	6.95978e-06	0.00472691	9.41313e-05	0.00463278	Distal Intergenic	chr15	68341208	68341289	82	-	387228	uc011ztq.1	-22132	ENSMUSG00000065437	Mir30d	microRNA 30d
1727	chr15	73512617	73512736	120	*	1.39379e-06	0.379407	0.00628684	0.372809	Promoter (<=1kb)	chr15	73512560	73572242	59683	+	105841	uc007wce.1	176	ENSMUSG00000036661	Dennd3	DENN/MADD domain containing 3
1728	chr15	73645438	73645505	68	*	1.90758e-08	0.377697	0.0028413	0.374856	Distal Intergenic	chr15	73580291	73624744	44454	-	106068	uc007wch.2	-20694	ENSMUSG00000079020	Slc45a4	solute carrier family 45, member 4
1729	chr15	74752623	74752707	85	*	3.88596e-06	0.299387	0.00402023	0.295367	Promoter (<=1kb)	chr15	74747856	74752979	5124	-	23936	uc007wfw.1	272	ENSMUSG00000022594	Lynx1	Ly6/neurotoxin 1
1730	chr15	75703983	75704032	50	*	8.30388e-08	0.373043	0.00470204	0.368341	Promoter (<=1kb)	chr15	75704288	75714419	10132	+	14787	uc007whc.2	-305	ENSMUSG00000022580	Rhpn1	rhophilin, Rho GTPase binding protein 1
1731	chr15	75909628	75909746	119	*	2.65223e-11	0.384523	0.00142073	0.383214	Promoter (<=1kb)	chr15	75909735	75914535	4801	+	105734	uc007whp.1	0	ENSMUSG00000103906	Tigd5	tigger transposable element derived 5
1732	chr15	75909879	75909892	14	*	8.58092e-06	0.00177445	3.60832e-05	0.00173836	Promoter (<=1kb)	chr15	75909735	75914535	4801	+	105734	uc007whp.1	157	ENSMUSG00000103906	Tigd5	tigger transposable element derived 5
1733	chr15	75929587	75929676	90	*	1.67235e-10	0.00456179	4.07629e-05	0.00452102	Promoter (<=1kb)	chr15	75924683	75929730	5048	-	22122	uc007whs.1	54	ENSMUSG00000022570	Tsta3	tissue specific transplantation antigen P35B
1734	chr15	75941095	75941183	89	*	1.74272e-09	0.382443	0.00335328	0.379088	Promoter (<=1kb)	chr15	75940952	75949400	8449	+	78834	uc007whu.1	231	ENSMUSG00000050846	Zfp623	zinc finger protein 623
1735	chr15	75941400	75941457	58	*	0.000196255	0.000619308	3.62436e-05	0.000582716	Promoter (<=1kb)	chr15	75940952	75949400	8449	+	78834	uc007whu.1	505	ENSMUSG00000050846	Zfp623	zinc finger protein 623
1736	chr15	76080964	76080971	8	*	8.8725e-09	0.00287254	3.55058e-05	0.00283704	Promoter (<=1kb)	chr15	76070182	76080946	10765	-	67959	uc007wij.2	-18	ENSMUSG00000002524	Puf60	poly-U binding splicing factor 60
1737	chr15	76240478	76240505	28	*	0.000275127	0.892758	0.752765	0.139993	Promoter (2-3kb)	chr15	76232791	76243440	10650	-	671535	uc007wjj.2	2935	ENSMUSG00000063268	Parp10	poly (ADP-ribose) polymerase family, member 10
1738	chr15	76246676	76246676	1	*	0.000318307	0.0098583	0.000313074	0.00954523	Promoter (<=1kb)	chr15	76246807	76249904	3098	+	66168	uc007wjl.1	-131	ENSMUSG00000022564	Grina	glutamate receptor, ionotropic, N-methyl D-aspartate-associated protein 1 (glutamate binding)
1739	chr15	76327652	76327674	23	*	2.02655e-10	0.00531663	4.44216e-05	0.00527221	Promoter (<=1kb)	chr15	76327465	76330670	3206	+	109075	uc029ssi.1	209	ENSMUSG00000034259	Exosc4	exosome component 4
1740	chr15	76657105	76657141	37	*	2.63575e-05	0.315133	0.00811778	0.307016	Promoter (<=1kb)	chr15	76646927	76656901	9975	-	54151	uc007wlh.2	-204	ENSMUSG00000053929	Cyhr1	cysteine and histidine rich 1
1741	chr15	76701487	76701518	32	*	1.057e-11	0.377039	0.000985961	0.376053	Promoter (<=1kb)	chr15	76701542	76704239	2698	+	69572	uc007wlt.1	-55	ENSMUSG00000019080	Mfsd3	major facilitator superfamily domain containing 3
1742	chr15	76818272	76818322	51	*	1.54715e-05	0.00342992	0.275385	-0.271955	Promoter (<=1kb)	chr15	76723985	76818170	94186	-	223666	uc007wmh.2	-102	ENSMUSG00000033697	Arhgap39	Rho GTPase activating protein 39
1743	chr15	76948790	76948807	18	*	3.45777e-09	0.00578123	5.81711e-05	0.00572305	Promoter (<=1kb)	chr15	76948629	76950731	2103	+	117171	uc011zvd.1	178	ENSMUSG00000063236	1110038F14Rik	RIKEN cDNA 1110038F14 gene
1744	chr15	78430168	78430194	27	*	4.73649e-05	0.585436	0.777168	-0.191732	Promoter (1-2kb)	chr15	78428564	78439303	10740	+	72844	uc007wph.2	1630	ENSMUSG00000033287	Kctd17	potassium channel tetramerisation domain containing 17
1745	chr15	78885375	78885380	6	*	0.000419944	0.935239	0.846876	0.0883012	Intron (uc007wrn.2/106039, intron 6 of 16)	chr15	78891840	78891913	74	+	102466210	uc033gvd.1	-6465	#N/A	Mir6955	microRNA 6955
1746	chr15	78899711	78899781	71	*	1.08009e-07	3.24931e-05	0.00370071	-0.00366822	Promoter (<=1kb)	chr15	78899786	78912052	12267	+	20401	uc007wro.1	-75	ENSMUSG00000022436	Sh3bp1	SH3-domain binding protein 1
1747	chr15	78900184	78900217	34	*	8.10105e-05	0.00225599	7.41273e-05	0.00218186	Promoter (<=1kb)	chr15	78899786	78912052	12267	+	20401	uc007wro.1	431	ENSMUSG00000022436	Sh3bp1	SH3-domain binding protein 1
1748	chr15	78900260	78900260	1	*	0.00117373	0.00626286	0.192436	-0.186173	Promoter (<=1kb)	chr15	78899786	78912052	12267	+	20401	uc007wro.1	474	ENSMUSG00000022436	Sh3bp1	SH3-domain binding protein 1
1749	chr15	78900746	78900771	26	*	0.000138255	0.000258536	0.0138953	-0.0136266	Promoter (<=1kb)	chr15	78901399	78912045	10647	+	20401	uc007wrr.1	-653	ENSMUSG00000022436	Sh3bp1	SH3-domain binding protein 1
1750	chr15	78935151	78935153	3	*	9.97315e-05	0.00239398	0.169076	-0.166682	Promoter (<=1kb)	chr15	78934933	78941910	6978	+	97961	uc007wrw.1	220	ENSMUSG00000033099	Nol12	nucleolar protein 12
1751	chr15	78935245	78935282	38	*	1.57222e-11	0.384639	0.000999025	0.38364	Promoter (<=1kb)	chr15	78934933	78941910	6978	+	97961	uc007wrw.1	349	ENSMUSG00000033099	Nol12	nucleolar protein 12
1752	chr15	78973978	78973998	21	*	0.000543817	0.724249	0.974809	-0.25056	Exon (uc007wry.1/110253, exon 10 of 25)	chr15	78983056	79005869	22814	+	110253	uc007wsa.1	-9078	ENSMUSG00000033088	Triobp	TRIO and F-actin binding protein
1753	chr15	78982882	78982992	111	*	8.82185e-12	0.383202	0.000930647	0.382199	Promoter (<=1kb)	chr15	78983056	79005869	22814	+	110253	uc007wsa.1	-174	ENSMUSG00000033088	Triobp	TRIO and F-actin binding protein
1754	chr15	79042751	79042795	45	*	3.61437e-07	0.00514013	0.000101218	0.00503891	Promoter (<=1kb)	chr15	79041885	79043558	1674	+	14429	uc007wsg.2	910	ENSMUSG00000006378	Galr3	galanin receptor 3
1755	chr15	79075303	79075385	83	*	7.79189e-08	0.343312	0.00315544	0.340832	Promoter (<=1kb)	chr15	79075223	79094400	19178	+	223691	uc007wsk.1	162	ENSMUSG00000033047	Eif3l	eukaryotic translation initiation factor 3, subunit L
1756	chr15	79109043	79109043	1	*	1.74495e-05	0.000176532	0.0100072	-0.00983065	Promoter (<=1kb)	chr15	79108983	79116284	7302	+	27008	uc007wsm.2	60	ENSMUSG00000033039	Micall1	microtubule associated monooxygenase, calponin and LIM domain containing -like 1
1757	chr15	79109047	79109053	7	*	8.5878e-07	0.357395	0.00652351	0.350872	Promoter (<=1kb)	chr15	79108983	79116284	7302	+	27008	uc007wsm.2	70	ENSMUSG00000033039	Micall1	microtubule associated monooxygenase, calponin and LIM domain containing -like 1
1758	chr15	79109060	79109067	8	*	7.60826e-07	7.17084e-05	0.00532606	-0.00525435	Promoter (<=1kb)	chr15	79108983	79116284	7302	+	27008	uc007wsm.2	84	ENSMUSG00000033039	Micall1	microtubule associated monooxygenase, calponin and LIM domain containing -like 1
1759	chr15	79109078	79109078	1	*	1.34886e-08	0.373192	0.00368423	0.369508	Promoter (<=1kb)	chr15	79108983	79116284	7302	+	27008	uc007wsm.2	95	ENSMUSG00000033039	Micall1	microtubule associated monooxygenase, calponin and LIM domain containing -like 1
1760	chr15	79109079	79109093	15	*	6.99313e-07	5.881e-05	0.00374519	-0.00368638	Promoter (<=1kb)	chr15	79108983	79116284	7302	+	27008	uc007wsm.2	110	ENSMUSG00000033039	Micall1	microtubule associated monooxygenase, calponin and LIM domain containing -like 1
1761	chr15	79109094	79109103	10	*	1.18798e-09	0.37603	0.00220081	0.373829	Promoter (<=1kb)	chr15	79108983	79116284	7302	+	27008	uc007wsm.2	120	ENSMUSG00000033039	Micall1	microtubule associated monooxygenase, calponin and LIM domain containing -like 1
1762	chr15	79109111	79109116	6	*	6.4454e-06	3.83997e-05	0.00107828	-0.00103988	Promoter (<=1kb)	chr15	79108983	79116284	7302	+	27008	uc007wsm.2	133	ENSMUSG00000033039	Micall1	microtubule associated monooxygenase, calponin and LIM domain containing -like 1
1763	chr15	79328044	79328078	35	*	1.97723e-05	0.00501443	8.39012e-05	0.00493053	Promoter (<=1kb)	chr15	79286228	79328371	42144	-	53357	uc007wtd.2	293	ENSMUSG00000042632	Pla2g6	phospholipase A2, group VI
1764	chr15	79441572	79441825	254	*	1.1158e-10	0.37877	0.00167815	0.37718	Promoter (<=1kb)	chr15	79422481	79441818	19338	-	27373	uc007wtm.1	0	ENSMUSG00000022433	Csnk1e	casein kinase 1, epsilon
1765	chr15	79455586	79455632	47	*	4.00594e-05	0.000728377	3.31367e-05	0.000695417	Distal Intergenic	chr15	79417852	79442057	24206	-	27373	uc007wtl.2	-13529	ENSMUSG00000022433	Csnk1e	casein kinase 1, epsilon
1766	chr15	79516704	79516775	72	*	2.34191e-05	3.46032e-05	0.00167517	-0.00164043	Promoter (<=1kb)	chr15	79516408	79527739	11332	+	105785	uc007wto.2	367	ENSMUSG00000010830	Kdelr3	KDEL (Lys-Asp-Glu-Leu) endoplasmic reticulum protein retention receptor 3
1767	chr15	79671063	79671156	94	*	1.02064e-10	4.29362e-05	0.0063007	-0.00625401	Promoter (<=1kb)	chr15	79670868	79672862	1995	+	223696	uc007wud.1	288	ENSMUSG00000022427	Tomm22	translocase of outer mitochondrial membrane 22 homolog (yeast)
1768	chr15	79687740	79687789	50	*	3.63328e-10	0.00857443	3.61191e-05	0.00853831	Promoter (<=1kb)	chr15	79674250	79687872	13623	-	74158	uc007wue.2	83	ENSMUSG00000022426	Josd1	Josephin domain containing 1
1769	chr15	80013279	80013283	5	*	1.75078e-07	0.00882114	5.67647e-05	0.00876438	Promoter (1-2kb)	chr15	79995876	80014808	18933	-	18591	uc007wuz.1	1525	ENSMUSG00000000489	Pdgfb	platelet derived growth factor, B polypeptide
1770	chr15	80234421	80234467	47	*	8.15162e-07	0.367375	0.00534354	0.362031	Promoter (<=1kb)	chr15	80234108	80236153	2046	+	239555	uc007wvg.1	359	ENSMUSG00000022412	Mief1	mitochondrial elongation factor 1
1771	chr15	80255897	80255950	54	*	3.58601e-14	0.384091	0.00030666	0.383677	Promoter (<=1kb)	chr15	80255184	80257545	2362	+	11911	uc007wvl.2	766	ENSMUSG00000042406	Atf4	activating transcription factor 4
1772	chr15	80256010	80256076	67	*	3.55604e-06	0.000109485	0.0128065	-0.012697	Promoter (<=1kb)	chr15	80255184	80257545	2362	+	11911	uc007wvl.2	892	ENSMUSG00000042406	Atf4	activating transcription factor 4
1773	chr15	80711622	80711678	57	*	1.76349e-11	0.383416	0.00103503	0.382381	Promoter (<=1kb)	chr15	80711313	80941086	229774	+	213988	uc007wvt.1	365	ENSMUSG00000047888	Tnrc6b	trinucleotide repeat containing 6b
1774	chr15	80711822	80711826	5	*	0.00125252	0.00400942	0.000161413	0.003848	Promoter (<=1kb)	chr15	80711313	80941086	229774	+	213988	uc007wvt.1	513	ENSMUSG00000047888	Tnrc6b	trinucleotide repeat containing 6b
1775	chr15	80711919	80711919	1	*	1.21625e-11	4.49004e-05	0.00694673	-0.00690183	Promoter (<=1kb)	chr15	80711313	80941086	229774	+	213988	uc007wvt.1	606	ENSMUSG00000047888	Tnrc6b	trinucleotide repeat containing 6b
1776	chr15	81407732	81407732	1	*	0.000353382	0.910276	0.949967	-0.0396908	Promoter (<=1kb)	chr15	81407088	81408273	1186	-	57755	uc007wwp.1	541	ENSMUSG00000047108	Dnajb7	DnaJ (Hsp40) homolog, subfamily B, member 7
1777	chr15	81466528	81466609	82	*	1.38937e-06	9.22256e-05	0.00842496	-0.00831994	Promoter (<=1kb)	chr15	81466316	81476369	10054	+	56438	uc007wwq.1	293	ENSMUSG00000022400	Rbx1	ring-box 1
1778	chr15	81811559	81811658	100	*	4.68047e-05	0.0018523	4.00316e-05	0.00181226	Promoter (<=1kb)	chr15	81811414	81826863	15450	+	21685	uc007wxk.2	244	ENSMUSG00000022389	Tef	thyrotroph embryonic factor
1779	chr15	82015957	82016006	50	*	8.20128e-05	0.000746565	3.41491e-05	0.000712416	Promoter (<=1kb)	chr15	81992523	82016140	23618	-	28075	uc007wxw.1	134	ENSMUSG00000022472	Desi1	desumoylating isopeptidase 1
1780	chr15	82147014	82147069	56	*	5.49352e-06	0.00625002	0.000107858	0.00614217	Promoter (<=1kb)	chr15	82147269	82173894	26626	+	20788	uc007wyh.1	-255	ENSMUSG00000022463	Srebf2	sterol regulatory element binding factor 2
1781	chr15	82147797	82147874	78	*	7.68979e-08	3.28124e-05	0.00377806	-0.00374525	Promoter (<=1kb)	chr15	82147269	82173894	26626	+	20788	uc007wyh.1	605	ENSMUSG00000022463	Srebf2	sterol regulatory element binding factor 2
1782	chr15	82224263	82224273	11	*	3.63256e-05	0.00149927	0.0228619	-0.0213626	Promoter (<=1kb)	chr15	82221744	82224336	2593	-	72049	uc007wyj.1	63	ENSMUSG00000068105	Tnfrsf13c	tumor necrosis factor receptor superfamily, member 13c
1783	chr15	82899103	82899130	28	*	8.36545e-07	0.00268	3.98725e-05	0.00264013	Promoter (<=1kb)	chr15	82899080	82905816	6737	+	100504637	uc007wzq.1	50	ENSMUSG00000100199	Gm20324	predicted gene, 20324
1784	chr15	82899351	82899366	16	*	1.62445e-07	0.00467606	5.72163e-05	0.00461885	Promoter (<=1kb)	chr15	82899080	82905816	6737	+	100504637	uc007wzq.1	286	ENSMUSG00000100199	Gm20324	predicted gene, 20324
1785	chr15	83349989	83350075	87	*	4.2813e-12	0.384936	0.000815402	0.384116	Promoter (<=1kb)	chr15	83299740	83350247	50508	-	66251	uc007xag.1	172	ENSMUSG00000054277	Arfgap3	ADP-ribosylation factor GTPase activating protein 3
1786	chr15	83464362	83464371	10	*	1.67146e-09	0.00269463	3.02211e-05	0.00266441	Promoter (<=1kb)	chr15	83375607	83464606	89000	-	23970	uc011zxc.1	235	ENSMUSG00000016664	Pacsin2	protein kinase C and casein kinase substrate in neurons 2
1787	chr15	84378956	84379025	70	*	0.000102727	0.644366	0.960507	-0.317239	Distal Intergenic	chr15	84326119	84342978	16860	+	64099	uc011zxg.1	52906	ENSMUSG00000022439	Parvg	parvin, gamma
1788	chr15	84853552	84853583	32	*	9.35789e-12	0.382677	0.000940788	0.381701	Promoter (1-2kb)	chr15	84785376	84855099	69724	-	271305	uc007xcm.2	1516	ENSMUSG00000016624	Phf21b	PHD finger protein 21B
1789	chr15	84853895	84853969	75	*	0.000131855	0.00203431	7.90621e-05	0.00195525	Promoter (1-2kb)	chr15	84785376	84855099	69724	-	271305	uc007xcm.2	1130	ENSMUSG00000016624	Phf21b	PHD finger protein 21B
1790	chr15	84853977	84853977	1	*	1.47315e-05	3.07937e-05	0.00163179	-0.00160099	Promoter (1-2kb)	chr15	84785376	84855099	69724	-	271305	uc007xcm.2	1122	ENSMUSG00000016624	Phf21b	PHD finger protein 21B
1791	chr15	84855164	84855169	6	*	3.25685e-06	0.00309578	5.23464e-05	0.00304343	Promoter (<=1kb)	chr15	84785376	84855099	69724	-	271305	uc007xcm.2	-65	ENSMUSG00000016624	Phf21b	PHD finger protein 21B
1792	chr15	84855313	84855313	1	*	0.000152542	5.41029e-05	0.00184015	-0.00178604	Promoter (<=1kb)	chr15	84785376	84855099	69724	-	271305	uc007xcm.2	-214	ENSMUSG00000016624	Phf21b	PHD finger protein 21B
1793	chr15	84855782	84855785	4	*	1.56266e-06	0.347785	0.00608052	0.341705	Promoter (<=1kb)	chr15	84785376	84856129	70754	-	271305	uc007xco.2	344	ENSMUSG00000016624	Phf21b	PHD finger protein 21B
1794	chr15	84855901	84856234	334	*	1.55093e-09	0.376528	0.000544334	0.373397	Promoter (<=1kb)	chr15	84785376	84856129	70754	-	271305	uc007xco.2	0	ENSMUSG00000016624	Phf21b	PHD finger protein 21B
1795	chr15	85037102	85037148	47	*	3.00927e-05	0.00177504	4.45711e-05	0.00173047	Promoter (<=1kb)	chr15	85037062	85044835	7774	+	73225	uc007xct.2	86	ENSMUSG00000022434	Fam118a	family with sequence similarity 118, member A
1796	chr15	85576624	85576637	14	*	8.95914e-44	9.21043e-05	0.0585693	-0.0584772	Promoter (1-2kb)	chr15	85535437	85578070	42634	-	22422	uc007xde.2	1433	ENSMUSG00000022382	Wnt7b	wingless-type MMTV integration site family, member 7B
1797	chr15	85670549	85670553	5	*	2.83297e-11	0.385137	0.000991851	0.384145	Distal Intergenic	chr15	85703773	85707524	3752	+	102800312	uc056yzv.1	-33224	#N/A	Lincppara	long intergenic noncoding RNA near Ppara
1798	chr15	85670559	85670559	1	*	1.00628e-05	3.17722e-05	0.00207832	-0.00204655	Distal Intergenic	chr15	85703773	85707524	3752	+	102800312	uc056yzv.1	-33214	#N/A	Lincppara	long intergenic noncoding RNA near Ppara
1799	chr15	85670561	85670619	59	*	8.78543e-08	0.381563	0.00372023	0.377843	Distal Intergenic	chr15	85703773	85707524	3752	+	102800312	uc056yzv.1	-33212	#N/A	Lincppara	long intergenic noncoding RNA near Ppara
1800	chr15	85670621	85670624	4	*	3.58447e-06	3.79397e-05	0.0045832	-0.00454526	Distal Intergenic	chr15	85703773	85707524	3752	+	102800312	uc056yzv.1	-33152	#N/A	Lincppara	long intergenic noncoding RNA near Ppara
1801	chr15	85670625	85670625	1	*	9.06412e-08	0.381727	0.00377762	0.377949	Distal Intergenic	chr15	85703773	85707524	3752	+	102800312	uc056yzv.1	-33148	#N/A	Lincppara	long intergenic noncoding RNA near Ppara
1802	chr15	85670632	85670632	1	*	3.84737e-06	3.48542e-05	0.00370781	-0.00367295	Distal Intergenic	chr15	85703773	85707524	3752	+	102800312	uc056yzv.1	-33141	#N/A	Lincppara	long intergenic noncoding RNA near Ppara
1803	chr15	85670638	85670740	103	*	5.41302e-06	0.00150748	3.2066e-05	0.00147541	Distal Intergenic	chr15	85703773	85707524	3752	+	102800312	uc056yzv.1	-33135	#N/A	Lincppara	long intergenic noncoding RNA near Ppara
1804	chr15	85670869	85670872	4	*	0.000560185	0.00196322	0.101194	-0.0992312	Distal Intergenic	chr15	85703773	85707524	3752	+	102800312	uc056yzv.1	-32904	#N/A	Lincppara	long intergenic noncoding RNA near Ppara
1805	chr15	85671567	85671628	62	*	1.1356e-68	0.00614027	3.04996e-05	0.00610978	Distal Intergenic	chr15	85703773	85707524	3752	+	102800312	uc056yzv.1	-32206	#N/A	Lincppara	long intergenic noncoding RNA near Ppara
1806	chr15	86032788	86032831	44	*	2.17885e-07	0.271193	0.00215689	0.269037	Promoter (<=1kb)	chr15	85898758	86033777	135020	-	12614	uc007xdt.1	946	ENSMUSG00000016028	Celsr1	cadherin, EGF LAG seven-pass G-type receptor 1 (flamingo homolog, Drosophila)
1807	chr15	86058527	86058573	47	*	2.00571e-05	0.360649	0.0115819	0.349067	Promoter (<=1kb)	chr15	86058727	86137636	78910	+	223752	uc007xdw.3	-200	ENSMUSG00000035900	Gramd4	GRAM domain containing 4
1808	chr15	86058750	86058768	19	*	0.000773732	2.96822e-05	0.000310464	-0.000280767	Promoter (<=1kb)	chr15	86058727	86137636	78910	+	223752	uc007xdw.3	41	ENSMUSG00000035900	Gramd4	GRAM domain containing 4
1809	chr15	86059001	86059030	30	*	1.51184e-09	0.383893	0.00239712	0.381662	Promoter (<=1kb)	chr15	86058727	86137636	78910	+	223752	uc007xdw.3	303	ENSMUSG00000035900	Gramd4	GRAM domain containing 4
1810	chr15	86214168	86214275	108	*	4.28553e-06	3.3308e-05	0.00254264	-0.00250933	Promoter (<=1kb)	chr15	86214459	86498503	284045	+	223754	uc007xea.1	-291	ENSMUSG00000051864	Tbc1d22a	TBC1 domain family, member 22a
1811	chr15	88751407	88751450	44	*	6.54438e-08	3.52299e-05	0.00445475	-0.00441952	Promoter (<=1kb)	chr15	88751711	88784516	32806	+	223773	uc007xem.1	-304	ENSMUSG00000034333	Zbed4	zinc finger, BED type containing 4
1812	chr15	88751583	88751583	1	*	7.13023e-06	0.0012667	3.17424e-05	0.00123496	Promoter (<=1kb)	chr15	88751711	88784516	32806	+	223773	uc007xem.1	-128	ENSMUSG00000034333	Zbed4	zinc finger, BED type containing 4
1813	chr15	88751749	88751851	103	*	5.79903e-11	0.380884	0.00155441	0.37933	Promoter (<=1kb)	chr15	88751711	88784516	32806	+	223773	uc007xem.1	140	ENSMUSG00000034333	Zbed4	zinc finger, BED type containing 4
1814	chr15	88863284	88863352	69	*	5.45495e-05	0.000905412	3.59939e-05	0.000869418	Promoter (1-2kb)	chr15	88862194	88865726	3533	+	223775	uc007xeq.1	1158	ENSMUSG00000035828	Pim3	proviral integration site 3
1815	chr15	89075897	89075899	3	*	2.34829e-06	3.22917e-05	0.0009773	-0.000945008	Promoter (<=1kb)	chr15	89071198	89075854	4657	-	69120	uc007xfb.1	-43	ENSMUSG00000087331	1810021B22Rik	RIKEN cDNA 1810021B22 gene
1816	chr15	89075972	89076014	43	*	7.76223e-06	0.00238212	3.94943e-05	0.00234147	Promoter (<=1kb)	chr15	89076064	89087075	11012	+	67976	uc007xfc.1	-92	ENSMUSG00000015363	Trabd	TraB domain containing
1817	chr15	89076140	89076160	21	*	3.57034e-10	0.00490981	3.07677e-05	0.00487904	Promoter (<=1kb)	chr15	89076064	89087075	11012	+	67976	uc007xfc.1	96	ENSMUSG00000015363	Trabd	TraB domain containing
1818	chr15	89076350	89076370	21	*	8.4324e-12	3.4641e-05	0.00836179	-0.00832715	Promoter (<=1kb)	chr15	89076595	89087075	10481	+	67976	uc007xfe.1	-245	ENSMUSG00000015363	Trabd	TraB domain containing
1819	chr15	89089095	89089106	12	*	0.000126447	2.97537e-05	0.00090138	-0.000871627	Promoter (<=1kb)	chr15	89089107	89100340	11234	+	223776	uc007xff.1	-12	ENSMUSG00000035757	Selo	selenoprotein O
1820	chr15	89089236	89089271	36	*	2.10709e-05	0.00086044	3.07263e-05	0.000829713	Promoter (<=1kb)	chr15	89089107	89100340	11234	+	223776	uc007xff.1	164	ENSMUSG00000035757	Selo	selenoprotein O
1821	chr15	89089401	89089401	1	*	0.00816803	0.0201629	0.254236	-0.234073	Promoter (<=1kb)	chr15	89089107	89100340	11234	+	223776	uc007xff.1	294	ENSMUSG00000035757	Selo	selenoprotein O
1822	chr15	89089595	89089613	19	*	3.54872e-05	3.30879e-05	0.00131856	-0.00128548	Promoter (<=1kb)	chr15	89089107	89100340	11234	+	223776	uc007xff.1	506	ENSMUSG00000035757	Selo	selenoprotein O
1823	chr15	89089696	89089753	58	*	0.00013114	0.00362154	8.67295e-05	0.00353497	Promoter (<=1kb)	chr15	89089107	89100340	11234	+	223776	uc007xff.1	646	ENSMUSG00000035757	Selo	selenoprotein O
1824	chr15	89128310	89128310	1	*	0.00292399	0.00234799	0.000143384	0.0022046	Promoter (<=1kb)	chr15	89123303	89128700	5398	-	170787	uc007xfj.2	390	ENSMUSG00000062906	Hdac10	histone deacetylase 10
1825	chr15	89128458	89128538	81	*	4.42617e-12	3.78875e-05	0.00545161	-0.00541386	Promoter (<=1kb)	chr15	89123303	89128700	5398	-	170787	uc007xfj.2	162	ENSMUSG00000062906	Hdac10	histone deacetylase 10
1826	chr15	89149246	89149389	144	*	2.9513e-05	3.04085e-05	0.00071842	-0.000688012	Promoter (<=1kb)	chr15	89142484	89149606	7123	-	19094	uc007xfp.2	217	ENSMUSG00000053137	Mapk11	mitogen-activated protein kinase 11
1827	chr15	89149534	89149569	36	*	1.11292e-11	0.384355	0.000959568	0.383396	Promoter (<=1kb)	chr15	89142484	89149606	7123	-	19094	uc007xfp.2	37	ENSMUSG00000053137	Mapk11	mitogen-activated protein kinase 11
1828	chr15	89181059	89181151	93	*	2.08037e-08	3.28925e-05	0.0055803	-0.00554722	Promoter (<=1kb)	chr15	89155546	89180788	25243	-	140570	uc007xfr.2	-271	ENSMUSG00000036606	Plxnb2	plexin B2
1829	chr15	89211517	89211595	79	*	1.24026e-11	0.00370326	3.48423e-05	0.00366854	Promoter (<=1kb)	chr15	89211559	89260672	49114	+	71474	uc007xfu.1	0	ENSMUSG00000036561	Ppp6r2	protein phosphatase 6, regulatory subunit 2
1830	chr15	89211673	89211673	1	*	0.00510003	0.00727133	0.142668	-0.135397	Promoter (<=1kb)	chr15	89211559	89260672	49114	+	71474	uc007xfu.1	114	ENSMUSG00000036561	Ppp6r2	protein phosphatase 6, regulatory subunit 2
1831	chr15	89211788	89211847	60	*	1.26168e-07	3.12479e-05	0.00233983	-0.00230789	Promoter (<=1kb)	chr15	89211559	89260672	49114	+	71474	uc007xfu.1	288	ENSMUSG00000036561	Ppp6r2	protein phosphatase 6, regulatory subunit 2
1832	chr15	89211936	89211971	36	*	3.33245e-05	0.00228448	6.51679e-05	0.00221931	Promoter (<=1kb)	chr15	89211559	89260672	49114	+	71474	uc007xfu.1	412	ENSMUSG00000036561	Ppp6r2	protein phosphatase 6, regulatory subunit 2
1833	chr15	89315127	89315127	1	*	5.18003e-05	0.379704	0.0150286	0.364675	Promoter (<=1kb)	chr15	89288236	89315311	27076	-	77980	uc007xfz.1	184	ENSMUSG00000036529	Sbf1	SET binding factor 1
1834	chr15	89315299	89315324	26	*	7.26701e-78	3.22791e-05	0.0105423	-0.0105101	Promoter (<=1kb)	chr15	89288236	89315311	27076	-	77980	uc007xfz.1	0	ENSMUSG00000036529	Sbf1	SET binding factor 1
1835	chr15	89315416	89315492	77	*	2.27924e-05	0.35175	0.00980821	0.341471	Promoter (<=1kb)	chr15	89288236	89315311	27076	-	77980	uc007xfz.1	-105	ENSMUSG00000036529	Sbf1	SET binding factor 1
1836	chr15	89499624	89499747	124	*	3.13788e-05	0.362724	0.0140394	0.342989	Promoter (<=1kb)	chr15	89499857	89560260	60404	+	58234	uc007xha.2	-233	ENSMUSG00000022623	Shank3	SH3/ankyrin domain gene 3
1837	chr15	89499903	89500056	154	*	2.75725e-05	4.47557e-05	0.00204888	-0.00200816	Promoter (<=1kb)	chr15	89499857	89560260	60404	+	58234	uc007xha.2	199	ENSMUSG00000022623	Shank3	SH3/ankyrin domain gene 3
1838	chr15	91573229	91573243	15	*	3.83127e-06	0.0137058	7.20231e-05	0.0136337	Promoter (<=1kb)	chr15	91267691	91573261	305571	-	239606	uc007xhy.2	18	ENSMUSG00000036298	Slc2a13	solute carrier family 2 (facilitated glucose transporter), member 13
1839	chr15	91673078	91673184	107	*	1.93772e-07	3.35144e-05	0.00249742	-0.00246391	Promoter (<=1kb)	chr15	91673224	91816124	142901	+	66725	uc007xhz.1	-146	ENSMUSG00000036273	Lrrk2	leucine-rich repeat kinase 2
1840	chr15	91673224	91673269	46	*	1.40104e-05	0.00203048	4.03963e-05	0.00199008	Promoter (<=1kb)	chr15	91673224	91816124	142901	+	66725	uc007xhz.1	0	ENSMUSG00000036273	Lrrk2	leucine-rich repeat kinase 2
1841	chr15	93002081	93002081	1	*	0.00174733	0.00427347	0.000252051	0.00402141	Distal Intergenic	chr15	93239742	93275084	35343	-	223827	uc007xiq.1	273003	ENSMUSG00000036197	Gxylt1	glucoside xylosyltransferase 1
1842	chr15	93275343	93275346	4	*	8.15732e-08	0.00421369	4.74371e-05	0.00416625	Promoter (<=1kb)	chr15	93239742	93275084	35343	-	223827	uc007xiq.1	-259	ENSMUSG00000036197	Gxylt1	glucoside xylosyltransferase 1
1843	chr15	93275488	93275492	5	*	1.28891e-05	6.81666e-05	0.00706685	-0.00699869	Promoter (<=1kb)	chr15	93239742	93275084	35343	-	223827	uc007xiq.1	-404	ENSMUSG00000036197	Gxylt1	glucoside xylosyltransferase 1
1844	chr15	93519020	93519050	31	*	7.38423e-12	0.379149	0.000931655	0.378217	Promoter (<=1kb)	chr15	93499114	93519436	20323	-	106042	uc007xja.1	386	ENSMUSG00000036158	Prickle1	prickle homolog 1 (Drosophila)
1845	chr15	93519250	93519284	35	*	6.16256e-05	0.00102349	3.75113e-05	0.000985979	Promoter (<=1kb)	chr15	93499114	93519436	20323	-	106042	uc007xja.1	152	ENSMUSG00000036158	Prickle1	prickle homolog 1 (Drosophila)
1846	chr15	93519307	93519432	126	*	1.64148e-07	4.39692e-05	0.00674674	-0.00670277	Promoter (<=1kb)	chr15	93499114	93519436	20323	-	106042	uc007xja.1	4	ENSMUSG00000036158	Prickle1	prickle homolog 1 (Drosophila)
1847	chr15	96284938	96284938	1	*	0.00344258	0.00559317	0.000293387	0.00529978	Promoter (1-2kb)	chr15	96134819	96283608	148790	-	70040	uc007xjz.1	-1330	#N/A	2610037D02Rik	RIKEN cDNA 2610037D02 gene
1848	chr15	96285136	96285306	171	*	1.06179e-06	3.12289e-05	0.00129587	-0.00126464	Promoter (1-2kb)	chr15	96134819	96283608	148790	-	70040	uc007xjz.1	-1528	#N/A	2610037D02Rik	RIKEN cDNA 2610037D02 gene
1849	chr15	96285341	96285404	64	*	8.315e-08	0.00410356	3.69628e-05	0.00405899	Promoter (1-2kb)	chr15	96134819	96283608	148790	-	70040	uc007xjz.1	-1733	#N/A	2610037D02Rik	RIKEN cDNA 2610037D02 gene
1850	chr15	96285567	96285693	127	*	0.000113242	3.77565e-05	0.00146571	-0.00143348	Promoter (1-2kb)	chr15	96287522	96405463	117942	+	77044	uc007xkd.2	-1955	ENSMUSG00000033237	Arid2	AT rich interactive domain 2 (ARID, RFX-like)
1851	chr15	96288141	96288176	36	*	8.14873e-12	0.384641	0.000797558	0.383843	Promoter (<=1kb)	chr15	96287522	96405463	117942	+	77044	uc007xkd.2	654	ENSMUSG00000033237	Arid2	AT rich interactive domain 2 (ARID, RFX-like)
1852	chr15	96460223	96460411	189	*	6.2899e-08	0.00420241	3.74742e-05	0.00416359	Promoter (<=1kb)	chr15	96411698	96460843	49146	-	72193	uc007xkf.1	432	ENSMUSG00000033228	Scaf11	SR-related CTD-associated factor 11
1853	chr15	96460936	96461029	94	*	4.26995e-07	0.00740446	7.90507e-05	0.00732541	Promoter (<=1kb)	chr15	96411698	96460843	49146	-	72193	uc007xkf.1	-93	ENSMUSG00000033228	Scaf11	SR-related CTD-associated factor 11
1854	chr15	96699167	96699167	1	*	0.00347715	0.000391483	0.0131376	-0.0127461	Promoter (<=1kb)	chr15	96687392	96699698	12307	-	67760	uc007xkm.1	531	ENSMUSG00000022462	Slc38a2	solute carrier family 38, member 2
1855	chr15	96699248	96699302	55	*	7.79693e-07	0.00124524	3.11797e-05	0.00121418	Promoter (<=1kb)	chr15	96687392	96699698	12307	-	67760	uc007xkm.1	396	ENSMUSG00000022462	Slc38a2	solute carrier family 38, member 2
1856	chr15	97247087	97247144	58	*	2.50104e-05	3.28773e-05	0.00164741	-0.00161455	Promoter (<=1kb)	chr15	97247107	97385691	138585	+	239647	uc007xkt.2	0	ENSMUSG00000044250	Pced1b	PC-esterase domain containing 1B
1857	chr15	97705712	97705760	49	*	5.88093e-11	0.00496472	3.74922e-05	0.00492723	Promoter (<=1kb)	chr15	97675105	97705822	30718	-	71919	uc007xkv.1	62	ENSMUSG00000022466	Rpap3	RNA polymerase II associated protein 3
1858	chr15	97784456	97784473	18	*	3.5693e-05	0.000897465	3.40338e-05	0.000863432	Promoter (<=1kb)	chr15	97784365	97792692	8328	+	67739	uc007xlb.2	108	ENSMUSG00000081534	Slc48a1	solute carrier family 48 (heme transporter), member 1
1859	chr15	97784624	97784731	108	*	4.06291e-05	3.36423e-05	0.0014521	-0.00141872	Promoter (<=1kb)	chr15	97784365	97792692	8328	+	67739	uc007xlb.2	366	ENSMUSG00000081534	Slc48a1	solute carrier family 48 (heme transporter), member 1
1860	chr15	97800981	97800981	1	*	0.00175548	0.700061	0.972235	-0.272174	Intron (uc007xld.2/56233, intron 10 of 22)	chr15	97789653	97792692	3040	+	67739	uc007xlc.2	11328	ENSMUSG00000081534	Slc48a1	solute carrier family 48 (heme transporter), member 1
1861	chr15	97908329	97908373	45	*	3.2594e-07	4.31622e-05	0.00355018	-0.00350702	Promoter (<=1kb)	chr15	97854427	97908296	53870	-	22337	uc007xlk.1	-33	ENSMUSG00000022479	Vdr	vitamin D receptor
1862	chr15	98092910	98093144	235	*	7.22181e-05	4.94006e-05	0.00257606	-0.00252102	Promoter (<=1kb)	chr15	98038744	98093037	54294	-	223870	uc007xlr.3	0	ENSMUSG00000033075	Senp1	SUMO1/sentrin specific peptidase 1
1863	chr15	98093230	98093289	60	*	0.000126758	0.36967	0.0139335	0.355326	Promoter (<=1kb)	chr15	98038744	98093037	54294	-	223870	uc007xlr.3	-193	ENSMUSG00000033075	Senp1	SUMO1/sentrin specific peptidase 1
1864	chr15	98123266	98123266	1	*	1.00371e-10	0.941856	0.800471	0.141384	Intron (uc011zyq.1/18642, intron 10 of 22)	chr15	98112060	98132447	20388	+	18642	uc007xlw.2	11206	ENSMUSG00000033065	Pfkm	phosphofructokinase, muscle
1865	chr15	98145499	98145602	104	*	3.9499e-05	0.00140355	3.56937e-05	0.00136786	Promoter (<=1kb)	chr15	98134640	98145702	11063	-	78541	uc007xlx.2	100	ENSMUSG00000048175	Asb8	ankyrin repeat and SOCS box-containing 8
1866	chr15	98181294	98181344	51	*	1.46955e-06	6.53389e-05	0.00797673	-0.00791204	Distal Intergenic	chr15	98167806	98170134	2329	+	239650	uc011zys.1	13538	ENSMUSG00000029875	Ccdc184	coiled-coil domain containing 184
1867	chr15	98534403	98534479	77	*	2.86128e-08	0.351953	0.00254634	0.349598	Promoter (<=1kb)	chr15	98517658	98534269	16612	-	69612	uc007xmr.2	-134	ENSMUSG00000022992	Kansl2	KAT8 regulatory NSL complex subunit 2
1868	chr15	98567363	98567389	27	*	0.000148351	5.69663e-05	0.00397039	-0.00391342	Promoter (<=1kb)	chr15	98567324	98570864	3541	+	100048895	uc007xmx.2	65	#N/A	9330020H09Rik	RIKEN cDNA 9330020H09 gene
1869	chr15	98677166	98677188	23	*	5.73618e-05	0.306346	0.00821671	0.298669	Promoter (<=1kb)	chr15	98663421	98677461	14041	-	223881	uc007xnh.1	273	ENSMUSG00000054855	Rnd1	Rho family GTPase 1
1870	chr15	98762975	98763114	140	*	1.32927e-06	0.00317626	3.60755e-05	0.00314016	Promoter (<=1kb)	chr15	98737626	98763118	25493	-	11842	uc007xnp.1	4	ENSMUSG00000051853	Arf3	ADP-ribosylation factor 3
1871	chr15	98763405	98763468	64	*	1.93814e-07	0.0100857	6.92219e-05	0.0100131	Promoter (<=1kb)	chr15	98737626	98763118	25493	-	11842	uc007xnp.1	-287	ENSMUSG00000051853	Arf3	ADP-ribosylation factor 3
1872	chr15	98831307	98831420	114	*	3.96923e-07	0.0025246	3.1567e-05	0.00249304	Promoter (<=1kb)	chr15	98812797	98831508	18712	-	19082	uc007xoa.1	88	ENSMUSG00000067713	Prkag1	protein kinase, AMP-activated, gamma 1 non-catalytic subunit
1873	chr15	98871625	98871740	116	*	1.5426e-08	0.00618609	4.52498e-05	0.00613885	Promoter (<=1kb)	chr15	98831669	98871205	39537	-	381022	uc029suy.1	-420	ENSMUSG00000048154	Kmt2d	lysine (K)-specific methyltransferase 2D
1874	chr15	98871957	98872034	78	*	1.85908e-07	3.41741e-05	0.00295531	-0.00292114	Promoter (<=1kb)	chr15	98831669	98871205	39537	-	381022	uc029suy.1	-752	ENSMUSG00000048154	Kmt2d	lysine (K)-specific methyltransferase 2D
1875	chr15	98917417	98917465	49	*	1.12324e-06	0.28527	0.00275826	0.282512	Promoter (<=1kb)	chr15	98903921	98918098	14178	-	74775	uc007xoi.1	633	ENSMUSG00000022999	Lmbr1l	limb region 1 like
1876	chr15	98918179	98918212	34	*	2.98114e-07	0.0026594	3.52893e-05	0.00262411	Promoter (<=1kb)	chr15	98903921	98918098	14178	-	74775	uc007xoi.1	-81	ENSMUSG00000022999	Lmbr1l	limb region 1 like
[truncated: 3,617 more rows]

## Sheet: Diet
	seqnames	start	end	width	strand	median.p	median.meth.group1	median.meth.group2	median.meth.diff	annotation	geneChr	geneStart	geneEnd	geneLength	geneStrand	geneId	transcriptId	distanceToTSS	ENSEMBL	SYMBOL	GENENAME
[truncated: 7,997 more rows]

[truncated: 1 more sheets: Interaction]
