# Supplementary material for: Ionizing Radiation Potentiates High-Fat Diet–Induced Insulin Resistance and Reprograms Skeletal Muscle and Adipose Progenitor Cells
Source: Oxford University Press journal article supplement (doi:10.2337/db16-0364), 2016-09-20
Supplement: db160364supplementarydata3.xlsx [file db160364supplementarydata3.xlsx]

## Sheet: RefSeqPromoters
seqnames	start	end	width	strand	logFC	logCPM	LR	PValue	refseq_id	ensembl_gene_id	external_gene_id	description	Function	refs
chrX	140906608	140908607	2000	+	2.95859	4.51903	23.4401	1.28863e-06	NM_030181	ENSMUSG00000031430	Vsig1	V-set and immunoglobulin domain containing 1 [Source:MGI Symbol;Acc:MGI:1926039]	decreased expression correlated with poor prognosis in gastric cancer /
chr12	35685305	35687304	2000	-	2.69213	4.38238	17.9274	2.2949e-05	NR_045051
chr13	84221296	84223295	2000	+	2.60213	4.51363	17.7315	2.54382e-05	NM_175187	ENSMUSG00000035762	Tmem161b	transmembrane protein 161B [Source:MGI Symbol;Acc:MGI:1919995]	not much info
chr13	84221296	84223295	2000	+	2.60213	4.51363	17.7315	2.54382e-05	NR_029418
chr13	84221296	84223295	2000	+	2.60213	4.51363	17.7315	2.54382e-05	NR_029419
chr8	19063811	19065810	2000	-	2.22097	4.50598	13.2835	0.000267759	NM_183038	ENSMUSG00000061847	Defb39	defensin beta 39 [Source:MGI Symbol;Acc:MGI:2672974]	no known function
chr9	21225282	21227281	2000	-	2.06954	4.52954	17.1725	3.41337e-05	NR_106127
chr2	86119224	86121223	2000	+	2.03899	4.50206	13.4764	0.000241579	NM_147013
chr4	3677121	3679120	2000	+	2.00881	4.43787	14.8319	0.000117533	NM_001111096	ENSMUSG00000042228	Lyn	Yamaguchi sarcoma viral (v-yes-1) oncogene homolog [Source:MGI Symbol;Acc:MGI:96892]	DUPLICATE DMR
chr4	3677121	3679120	2000	+	2.00881	4.43787	14.8319	0.000117533	NM_010747	ENSMUSG00000042228	Lyn	Yamaguchi sarcoma viral (v-yes-1) oncogene homolog [Source:MGI Symbol;Acc:MGI:96892]	Src kinase / non receptor tyrosine kinase signalling in response to growth factors and cytokines, integrin signaling, but also responses to DNA damage and genotoxic agents /
chr13	104227845	104229844	2000	-	1.99361	4.37353	11.8721	0.000569808	NM_172807	ENSMUSG00000021713	Ppwd1	peptidylprolyl isomerase domain and WD repeat containing 1 [Source:MGI Symbol;Acc:MGI:2443069]	No Known function
chr6	95332994	95334993	2000	-	1.91699	4.5504	11.4176	0.000727529	NR_033559	ENSMUSG00000068180	AY512915	cDNA sequence AY512915 [Source:MGI Symbol;Acc:MGI:3041245]	No known function
chr3	9402078	9404077	2000	+	1.90161	4.59749	15.8243	6.95054e-05	NR_015499	ENSMUSG00000097365	C030034L19Rik	RIKEN cDNA C030034L19 gene [Source:MGI Symbol;Acc:MGI:2444519]	No known function
chr12	73906867	73908866	2000	+	1.86447	4.29766	10.8161	0.00100621	NM_010431	ENSMUSG00000021109	Hif1a	hypoxia inducible factor 1, alpha subunit [Source:MGI Symbol;Acc:MGI:106918]	regulator of cellular and systemic homeostatic response to hypoxia
chr2	70824481	70826480	2000	-	1.85161	4.35311	10.332	0.00130744	NM_172664	ENSMUSG00000041997	Tlk1	tousled-like kinase 1 [Source:MGI Symbol;Acc:MGI:2441683]	serine/threonine kinase that may be involved in the regulation of chromatin assembly / only active when it is phosphorylated, and this phosphorylation is cell cycle-dependent / molecular chaperone DNA repair /
chr15	91190808	91192807	2000	-	1.85104	4.93806	18.5069	1.69288e-05	NM_011994	ENSMUSG00000055782	Abcd2	ATP-binding cassette, sub-family D (ALD), member 2 [Source:MGI Symbol;Acc:MGI:1349467]	ALD subfamily, which is involved in peroxisomal import of fatty acids and/or fatty acyl-CoAs in the organelle
chr7	128460514	128462513	2000	-	1.82804	4.42445	11.5978	0.000660299	NM_009383	ENSMUSG00000030846	Tial1	Tia1 cytotoxic granule-associated RNA binding protein-like 1 [Source:MGI Symbol;Acc:MGI:107913]	involved in SIRT1 splicing
chr4	58008125	58010124	2000	-	1.82578	4.91594	16.4815	4.91261e-05	NM_026132	ENSMUSG00000038709	Txndc8	thioredoxin domain containing 8 [Source:MGI Symbol;Acc:MGI:1914652]	not much info / GO annotations related to this gene include electron carrier activity and protein disulfide oxidoreductase activity
chr19	13794610	13796609	2000	-	1.80063	4.52344	10.9995	0.000911386	NM_146741	ENSMUSG00000044040	Olfr1497	olfactory receptor 1497 [Source:MGI Symbol;Acc:MGI:3031331]	no specific info on this isoform
chr16	59109609	59111608	2000	-	1.79716	4.35408	10.3911	0.00126621	NM_001011791	ENSMUSG00000060057	Olfr193	olfactory receptor 193 [Source:MGI Symbol;Acc:MGI:3030027]	no known function
chr2	25783617	25785616	2000	+	1.76398	4.74748	15.2539	9.3984e-05	NR_045340	ENSMUSG00000085484	Gm13539	predicted gene 13539 [Source:MGI Symbol;Acc:MGI:3651926]	No known function
chr4	52050111	52052110	2000	-	1.75545	4.53381	10.8019	0.00101396	NR_040668	ENSMUSG00000085515	C630028M04Rik	RIKEN cDNA C630028M04 gene [Source:MGI Symbol;Acc:MGI:3045376]	No known function
chr11	82869745	82871744	2000	-	1.74868	4.49309	11.852	0.000575988	NM_001164570	ENSMUSG00000020696	Rffl	ring finger and FYVE like domain containing protein [Source:MGI Symbol;Acc:MGI:1914588]	A.K.A Carp2 - involved in uniquitination pathways / E3 ligase / involved p53 degradation /
chr12	72408055	72410054	2000	-	1.73866	4.69041	11.9882	0.000535389	NM_153457	ENSMUSG00000021087	Rtn1	reticulon 1 [Source:MGI Symbol;Acc:MGI:1933947]	Endoplasmatic Reticulum /
chr12	72408055	72410054	2000	-	1.73866	4.69041	11.9882	0.000535389	NM_001286448
chr9	87254533	87256532	2000	-	1.68899	4.56957	12.3103	0.000450456	NM_199316	ENSMUSG00000056919	4922501C03Rik	RIKEN cDNA 4922501C03 gene [Source:MGI Symbol;Acc:MGI:1925343]	No known function
chr6	142297425	142299424	2000	+	1.65923	4.60095	12.3841	0.000433016	NM_010491	ENSMUSG00000041681	Iapp	islet amyloid polypeptide [Source:MGI Symbol;Acc:MGI:96382]	function well characterised in relation to beta cell dysfunction in T2D - but in muscle?
chr19	34007254	34009253	2000	+	1.65601	4.76048	11.2919	0.00077844	NM_001205349	ENSMUSG00000024771	Lipk	lipase, family member K [Source:MGI Symbol;Acc:MGI:2679259]	hydrolase activity, acting on ester bonds / nothing interesting on PUBMED
chr19	34007254	34009253	2000	+	1.65601	4.76048	11.2919	0.00077844	NM_172837	ENSMUSG00000024771	Lipk	lipase, family member K [Source:MGI Symbol;Acc:MGI:2679259]	DUPLICATE DMR
chr13	54782998	54784997	2000	+	1.65045	4.87364	11.1567	0.000837295	NM_001039683	ENSMUSG00000074895	Eif4e1b	eukaryotic translation initiation factor 4E family member 1B [Source:MGI Symbol;Acc:MGI:2685119]	DUPLICATE DMR
chr13	54782998	54784997	2000	+	1.65045	4.87364	11.1567	0.000837295	NM_001033269	ENSMUSG00000074895	Eif4e1b	eukaryotic translation initiation factor 4E family member 1B [Source:MGI Symbol;Acc:MGI:2685119]	member of translation initiation factor
chr13	54782998	54784997	2000	+	1.65045	4.87364	11.1567	0.000837295	NM_001286178
chr13	54782998	54784997	2000	+	1.65045	4.87364	11.1567	0.000837295	NR_104407
chr13	54782998	54784997	2000	+	1.65045	4.87364	11.1567	0.000837295	NR_104406
chr13	54782998	54784997	2000	+	1.65045	4.87364	11.1567	0.000837295	NM_001286180
chr13	54782998	54784997	2000	+	1.65045	4.87364	11.1567	0.000837295	NM_001286179
chr10	112164676	112166675	2000	+	1.5683	4.81173	10.732	0.00105301	NM_178278	ENSMUSG00000035694	Caps2	calcyphosphine 2 [Source:MGI Symbol;Acc:MGI:2441980]	Calcyphosine-2 is a calcium-binding protein
chr15	102230936	102232935	2000	-	1.55349	4.58555	10.645	0.00110368	NM_013566	ENSMUSG00000001281	Itgb7	integrin beta 7 [Source:MGI Symbol;Acc:MGI:96616]	Potential role in leukocyte adhesion to endothelial cells of gut/ Interacts with VCAM and fibrinectin of ECM / multiple alt. Splicing sites of unknown function
chr4	24850087	24852086	2000	-	1.54795	4.98166	10.8545	0.000985545	NM_001033531	ENSMUSG00000040387	Klhl32	kelch-like 32 [Source:MGI Symbol;Acc:MGI:3612790]	found in GWAS for BMI
chr4	24850087	24852086	2000	-	1.54795	4.98166	10.8545	0.000985545	NM_001163020	ENSMUSG00000040387	Klhl32	kelch-like 32 [Source:MGI Symbol;Acc:MGI:3612790]	DUPLICATE DMR
chr12	109681197	109683196	2000	+	1.54549	4.76628	10.6414	0.00110581	NR_030540	ENSMUSG00000077881	Mir882	microRNA 882 [Source:MGI Symbol;Acc:MGI:3718573]	Doesnt make sense in Promoters (Lars)
chr12	69167814	69169813	2000	+	1.52303	4.70514	10.5711	0.00114871	NM_001081406	ENSMUSG00000034883	Lrr1	leucine rich repeat protein 1 [Source:MGI Symbol;Acc:MGI:1916956]	It specifically interacts with TNFRSF9/4-1BB, a member of the tumor necrosis factor receptor (TNFR) superfamily / Overexpression of this gene suppresses the activation of NF-kappa B AND jnk / targets a CDK inhibitor in C Elegans /
chr8	111939703	111941702	2000	+	1.51922	4.62549	10.5678	0.00115072	NM_026693	ENSMUSG00000031950	Gabarapl2	gamma-aminobutyric acid (GABA) A receptor-associated protein-like 2 [Source:MGI Symbol;Acc:MGI:1890602]	not much info
chr5	76904515	76906514	2000	-	1.48956	4.89826	14.1992	0.000164442	NM_173765	ENSMUSG00000055923	Aasdh	aminoadipate-semialdehyde dehydrogenase [Source:MGI Symbol;Acc:MGI:2442517]	not much info
chr19	20404288	20406287	2000	+	1.4877	4.9313	12.5508	0.000396027	NR_045817	ENSMUSG00000094732	1500015L24Rik	RIKEN cDNA 1500015L24 gene [Source:MGI Symbol;Acc:MGI:1916244]	No known function
chr4	83323190	83325189	2000	-	1.47974	4.64433	10.8436	0.000991389	NM_027238	ENSMUSG00000038172	Ttc39b	tetratricopeptide repeat domain 39B [Source:MGI Symbol;Acc:MGI:1917113]	not much info / related with several GWAS for dyslipidemia
chr9	52678863	52680862	2000	+	1.46702	4.61531	10.8724	0.000976074	NR_045333		predicted gene
chr9	71483959	71485958	2000	-	1.46655	4.71702	11.1048	0.000861036	NM_001164793	ENSMUSG00000032199	Polr2m	polymerase (RNA) II (DNA directed) polypeptide M [Source:MGI Symbol;Acc:MGI:107282]	a.k.a Pol II(G) / negative regulator of transcriptional activation by the Mediator complex /
chr4	108031091	108033090	2000	-	1.46575	4.90484	10.4875	0.00120183	NM_172874	ENSMUSG00000028600	Podn	podocan [Source:MGI Symbol;Acc:MGI:2674939]	negative reg of smooth muscle cell prol / GO annotations related to this gene include collagen binding /
chr4	108031091	108033090	2000	-	1.46575	4.90484	10.4875	0.00120183	NM_001285958
chr10	81284782	81286781	2000	-	1.45753	4.8147	11.3024	0.000774059	NM_001282096	ENSMUSG00000034917	Tjp3	tight junction protein 3 [Source:MGI Symbol;Acc:MGI:1351650]	The protein encoded by this gene plays a role in the linkage between the actin cytoskeleton and tight-junctions and also sequesters cyclin D1 at tight junctions during mitosis
chr19	31663371	31665370	2000	-	1.43486	4.93105	13.6557	0.000219576	NM_011160	ENSMUSG00000052920	Prkg1	protein kinase, cGMP-dependent, type I [Source:MGI Symbol;Acc:MGI:108174]	A.k.a PKG / three different isoforms of cyclic GMP-dependent protein kinase (Ialpha, Ibeta, and II) / nitric oxide/cGMP signaling pathway / modulating cell growth
chr2	154407085	154409084	2000	-	1.43482	4.89875	10.2083	0.00139806	NM_009228	ENSMUSG00000027488	Snta1	syntrophin, acidic 1 [Source:MGI Symbol;Acc:MGI:101772]	cytoplasmic peripheral membrane scaffold proteins / this isoform mainly in cardiac muscle / alters intracellular calcium ion levels in muscle tissue /
chr1	131969609	131971608	2000	+	1.43306	4.88089	10.4495	0.00122684	NM_145977	ENSMUSG00000026435	Slc45a3	solute carrier family 45, member 3 [Source:MGI Symbol;Acc:MGI:1922082]	Associated with prostate cancer /
chr2	110049480	110051479	2000	-	1.42651	4.61804	10.2833	0.00134237	NR_040508	ENSMUSG00000086186	1700024P03Rik	RIKEN cDNA 1700024P03 gene [Source:MGI Symbol;Acc:MGI:1922767]	No known function
chr10	80608260	80610259	2000	+	1.40523	4.96236	12.8068	0.000345363	NR_105877
chr7	133127251	133129250	2000	+	1.39791	4.89123	11.0754	0.00087481	NR_046279
chr7	121391296	121393295	2000	+	1.39674	4.99318	11.7076	0.000622454	NM_001081327	ENSMUSG00000046321	Hs3st2	heparan sulfate (glucosamine) 3-O-sulfotransferase 2 [Source:MGI Symbol;Acc:MGI:1333802]	Primarily in brain?
chr12	8946929	8948928	2000	+	1.39039	5.14433	12.2942	0.000454376	NM_010770	ENSMUSG00000020583	Matn3	matrilin 3 [Source:MGI Symbol;Acc:MGI:1328350]	ECM protein / important in chondrocytes
chr5	124578058	124580057	2000	-	1.3795	4.80482	10.2124	0.00139503	NM_145371	ENSMUSG00000029388	Eif2b1	eukaryotic translation initiation factor 2B, subunit 1 (alpha) [Source:MGI Symbol;Acc:MGI:2384802]	encodes one of five subunits of eukaryotic translation initiation factor 2B (EIF2B), a GTP exchange factor for eukaryotic initiation factor 2 and an essential regulator for protein synthesis
chr2	127340636	127342635	2000	+	1.37621	4.88498	11.4819	0.00070276	NM_001291003
chr10	51589461	51591460	2000	-	1.29808	5.10622	12.9588	0.000318422	NM_029894	ENSMUSG00000019909	Fam162b	family with sequence similarity 162, member B [Source:MGI Symbol;Acc:MGI:1924546]	No Known function
chr9	58014017	58016016	2000	+	1.29718	4.99	11.5588	0.000674308	NM_019779	ENSMUSG00000032323	Cyp11a1	cytochrome P450, family 11, subfamily a, polypeptide 1 [Source:MGI Symbol;Acc:MGI:88582]	Mitochondrial inner membrane and catalyzes the conversion of cholesterol to pregnenolone, the first and rate-limiting step in the synthesis of the steroid hormones /
chr11	96943146	96945145	2000	+	1.2915	5.22479	13.3556	0.000257655	NR_003293	ENSMUSG00000078700	D030028A08Rik	RIKEN cDNA D030028A08 gene [Source:MGI Symbol;Acc:MGI:2441931]	No known function
chr18	31948637	31950636	2000	-	1.27103	5.08773	11.5117	0.000691582	NM_001025381	ENSMUSG00000052229	Gpr17	G protein-coupled receptor 17 [Source:MGI Symbol;Acc:MGI:3584514]	not much known about this variant
chr7	126758626	126760625	2000	+	1.25054	5.01807	12.1622	0.000487673	NM_011952	ENSMUSG00000063065	Mapk3	mitogen-activated protein kinase 3 [Source:MGI Symbol;Acc:MGI:1346859]	ERK1
chr16	44866097	44868096	2000	+	1.24986	4.91389	11.1521	0.000839376	NM_206535	ENSMUSG00000090176	Cd200r2	Cd200 receptor 2 [Source:MGI Symbol;Acc:MGI:3042847]	no known function
chr5	120115513	120117512	2000	+	1.24151	5.19676	10.7419	0.00104736	NM_028762	ENSMUSG00000029594	Rbm19	RNA binding motif protein 19 [Source:MGI Symbol;Acc:MGI:1921361]	no much known / may be involved in regulating ribosome biogenesis /
chr3	138130378	138132377	2000	-	1.2331	5.40853	11.8532	0.00057561	NM_008642	ENSMUSG00000028158	Mttp	microsomal triglyceride transfer protein [Source:MGI Symbol;Acc:MGI:106926]	central role in lipoprotein assembly
chr17	46324767	46326766	2000	-	1.22461	5.47781	10.6923	0.0010758	NM_145140	ENSMUSG00000032842	Abcc10	ATP-binding cassette, sub-family C (CFTR/MRP), member 10 [Source:MGI Symbol;Acc:MGI:2386976]	ATP-binding cassette (ABC) transporters / involved in drug resistance including chemotherapy /
chr9	71162290	71164289	2000	-	1.2177	5.0099	10.2674	0.00135402	NM_022026	ENSMUSG00000032204	Aqp9	aquaporin 9 [Source:MGI Symbol;Acc:MGI:1891066]	transporter
chr9	71162290	71164289	2000	-	1.2177	5.0099	10.2674	0.00135402	NR_073483		aquaporin 9
chr5	138036224	138038223	2000	+	1.21515	5.3204	13.4169	0.000249365	NM_001039889	ENSMUSG00000079156	Smok3b	sperm motility kinase 3B [Source:MGI Symbol;Acc:MGI:3615348]	no known function
chr7	29155211	29157210	2000	-	1.19752	5.26192	13.8023	0.000203088	NM_001146023	ENSMUSG00000030590	Fam98c	family with sequence similarity 98, member C [Source:MGI Symbol;Acc:MGI:1921083]	not much info
chr10	112725926	112727925	2000	+	1.19469	5.03841	10.8561	0.000984707	NR_040579
chr11	96943020	96945019	2000	-	1.17117	5.26383	11.7113	0.000621225	NM_134021	ENSMUSG00000018659	Pnpo	pyridoxine 5'-phosphate oxidase [Source:MGI Symbol;Acc:MGI:2144151]	Implicated in epilepsi / OBS: ratelimiting enzyme in Vit B6 metabolism - homocyteine metabolism!
chr17	94863918	94865917	2000	+	1.1691	5.14167	12.3392	0.000443549	NM_001024731	ENSMUSG00000095193	Gm20939	predicted gene, 20939 [Source:MGI Symbol;Acc:MGI:5434295]	No known function
chr8	103346535	103348534	2000	-	1.14607	5.20683	12.278	0.000458327	NR_036588
chr13	74291310	74293309	2000	-	1.1404	5.20919	11.5667	0.00067143	NM_009644	ENSMUSG00000021575	Ahrr	aryl-hydrocarbon receptor repressor [Source:MGI Symbol;Acc:MGI:1333776]	regulates proliferation and differentiation / involved in cytochromoe p450 signalling?
chr11	78072170	78074169	2000	+	1.13019	5.29112	12.3874	0.000432252	NR_029971	ENSMUSG00000070065	Mir451	microRNA 451 [Source:MGI Symbol;Acc:MGI:3619412]	Doesnt make sense in Promoters (Lars)
chr15	96274276	96276275	2000	-	1.1207	5.21282	12.3739	0.000435388	NR_030690
chr5	106695831	106697830	2000	-	1.10204	5.30497	12.1193	0.000499014	NM_026856	ENSMUSG00000049606	Zfp644	zinc finger protein 644 [Source:MGI Symbol;Acc:MGI:1277212]	No known function / Expressed in eye?
chr8	108666191	108670190	4000	-	1.08924	5.95102	10.4736	0.00121093	NR_030569	ENSMUSG00000078025	Mir466g	microRNA 466g [Source:MGI Symbol;Acc:MGI:3718536]	Doesnt make sense in Promoters (Lars)
chr11	78072242	78074241	2000	-	1.04813	5.3104	11.2804	0.000783283	NR_105850
chr6	147689241	147691240	2000	+	1.03403	5.94294	14.1924	0.000165039	NR_033636	ENSMUSG00000085077	1700049E15Rik	RIKEN cDNA 1700049E15 gene [Source:MGI Symbol;Acc:MGI:1920644]	No known function
chr14	103512341	103514340	2000	+	0.969101	5.63842	11.4346	0.000720893	NM_022886	ENSMUSG00000022123	Scel	sciellin [Source:MGI Symbol;Acc:MGI:1891228]	The protein encoded by this gene is a precursor to the cornified envelope of terminally differentiated keratinocytes
chr4	138737439	138739438	2000	-	0.966899	5.41371	10.8175	0.00100546	NM_001285929
chr11	52125746	52127745	2000	+	0.929544	5.97929	11.2971	0.000776291	NR_037221	ENSMUSG00000092870	Mir3061	microRNA 3061 [Source:MGI Symbol;Acc:MGI:4834233]	Doesnt make sense in Promoters (Lars)
chr19	53254206	53256205	2000	-	0.853387	6.04078	12.8751	0.000332978	NR_036590
chr18	53647151	53649150	2000	+	0.700523	6.0586	11.1929	0.000821098	NR_040349
chr1	88268409	88270408	2000	-	-0.335071	8.66971	18.043	2.15971e-05	NR_040291
chr14	46378524	46380523	2000	+	-0.444269	7.29015	11.7202	0.000618264	NR_037981
chr2	130099394	130101393	2000	+	-0.459509	7.19792	11.969	0.000540942	NM_001033197
chr3	10196284	10198283	2000	-	-0.464132	7.36845	12.6766	0.000370269	NM_011598	ENSMUSG00000027528	Fabp9	fatty acid binding protein 9, testis [Source:MGI Symbol;Acc:MGI:1194881]	Not much info
chr15	98378109	98380108	2000	-	-0.472715	8.32588	10.4882	0.00120142	NM_147036	ENSMUSG00000056184	Olfr283	olfactory receptor 283 [Source:MGI Symbol;Acc:MGI:3030117]	not much specific about this variant
chr6	82945922	82947921	2000	+	-0.48179	7.55497	10.4294	0.00124023	NM_033079	ENSMUSG00000030041	M1ap	meiosis 1 associated protein [Source:MGI Symbol;Acc:MGI:1315200]	not much known / encodes a protein that is likely to function in progression of meiosis /
chr10	87965671	87967670	2000	+	-0.482802	7.24306	12.2212	0.000472494	NR_000040
chr7	29082695	29084694	2000	-	-0.488985	7.42169	10.7709	0.0010311	NR_035489	ENSMUSG00000089219	Mir1963	microRNA 1963 [Source:MGI Symbol;Acc:MGI:3837208]	Doesnt make sense in Promoters (Lars)
chr7	141077229	141079228	2000	+	-0.497647	7.4011	13.6951	0.000215012	NM_001162924	ENSMUSG00000054065	Pkp3	plakophilin 3 [Source:MGI Symbol;Acc:MGI:1891830]	participate in linking cadherins to intermediate filaments in the cytoskeleton. This protein may act in cellular desmosome-dependent adhesion and signaling pathways/
chr18	77280958	77282957	2000	+	-0.499094	7.25123	11.6027	0.000658561	NM_172834	ENSMUSG00000032818	Loxhd1	lipoxygenase homology domains 1 [Source:MGI Symbol;Acc:MGI:1914609]	not much known
chr8	43306010	43308009	2000	-	-0.505523	7.82039	20.9939	4.60738e-06	NM_009556	ENSMUSG00000051176	Zfp42	zinc finger protein 42 [Source:MGI Symbol;Acc:MGI:99187]	a.k.a REX1 / reprogramming of X-chromosome inactivation during the acquisition of pluripotency.
chr4	42873204	42875203	2000	-	-0.505617	7.36549	14.908	0.000112881	NM_177785	ENSMUSG00000050141	BC049635	cDNA sequence BC049635 [Source:MGI Symbol;Acc:MGI:2679716]	No known function
chr3	88368721	88370720	2000	-	-0.513546	7.49308	11.1169	0.000855426	NM_031368	ENSMUSG00000074489	Bglap3	bone gamma-carboxyglutamate protein 3 [Source:MGI Symbol;Acc:MGI:88155]	osteocalcin related protein
chr12	71539607	71541606	2000	+	-0.516126	7.42462	11.1309	0.000849007	NR_045941
chr6	134981001	134983000	2000	+	-0.521891	7.23642	15.7102	7.38236e-05	NM_001109914	ENSMUSG00000090698	Apold1	apolipoprotein L domain containing 1 [Source:MGI Symbol;Acc:MGI:2685921]	/Primiarily in endothelial cells ? / regulation of endothelial cell signaling and vascular function
chr10	9683722	9685721	2000	+	-0.524484	7.19178	10.7648	0.00103449	NR_038036
chr3	127160305	127162304	2000	+	-0.525372	6.84661	10.4058	0.00125621	NR_105029
chr3	127160305	127162304	2000	+	-0.525372	6.84661	10.4058	0.00125621	NR_105030
chr2	76359454	76361453	2000	-	-0.529904	7.59917	17.1962	3.37117e-05	NM_009989	ENSMUSG00000056436	Cyct	cytochrome c, testis [Source:MGI Symbol;Acc:MGI:88579]	pseudogene, and is affiliated with the lncRNA class.
chr12	109590537	109592536	2000	+	-0.532545	8.16183	12.7376	0.000358376	NR_002848	ENSMUSG00000070072	Mir433	microRNA 433 [Source:MGI Symbol;Acc:MGI:3619404]	Doesnt make sense in Promoters (Lars)
chr1	91144103	91146102	2000	+	-0.535502	7.94459	10.7886	0.00102126	NM_001033408	ENSMUSG00000070732	Rbm44	RNA binding motif protein 44 [Source:MGI Symbol;Acc:MGI:2685663]	Intercellular bridge protein / shown to be important in germ cell coherence during germ cell differentiation
chrX	51971773	51973772	2000	-	-0.536755	6.90142	12.9465	0.000320528	NM_028851	ENSMUSG00000031118	1700080O16Rik	RIKEN cDNA 1700080O16 gene [Source:MGI Symbol;Acc:MGI:1921529]	No known function
chr14	62455290	62457289	2000	-	-0.542253	7.39195	10.3915	0.00126598	NM_172810	ENSMUSG00000021933	Gucy1b2	guanylate cyclase 1, soluble, beta 2 [Source:MGI Symbol;Acc:MGI:2660873]	DUPLICATE DMR
chr14	62455290	62457289	2000	-	-0.542253	7.39195	10.3915	0.00126598	NM_001204340	ENSMUSG00000021933	Gucy1b2	guanylate cyclase 1, soluble, beta 2 [Source:MGI Symbol;Acc:MGI:2660873]	convert guanosine-5'-triphosphate (GTP) into 3',5'-guanosine monophosphate (cGMP) and pyrophosphate / soluble GC (sGC), which are the receptor for nitric oxide (NO) /
chr18	37009858	37011857	2000	+	-0.54695	7.93532	10.7552	0.00103989	NM_009960	ENSMUSG00000007440	Pcdha2	protocadherin alpha 2 [Source:MGI Symbol;Acc:MGI:2681880]
chr2	171961800	171963799	2000	-	-0.547203	7.37865	12.5326	0.000399903	NR_040509	ENSMUSG00000086823	1700028P15Rik	RIKEN cDNA 1700028P15 gene [Source:MGI Symbol;Acc:MGI:1922905]	No known function
chr12	73547483	73549482	2000	+	-0.54724	7.02984	11.7004	0.000624874	NR_044985
chr9	108478862	108480861	2000	+	-0.549122	6.9925	10.7225	0.00105843	NM_008483	ENSMUSG00000052911	Lamb2	laminin, beta 2 [Source:MGI Symbol;Acc:MGI:99916]	beta 2 has a more restricted tissue distribution / extracellular matrix glycoproteins / involved with differentiation, migration, signaling /
chr11	62550504	62554503	4000	+	-0.549847	7.36295	12.5086	0.000405073	NR_002875
chr18	52330536	52332535	2000	+	-0.556008	7.88091	10.4699	0.00121335	NM_026286	ENSMUSG00000024510	Ftmt	ferritin mitochondrial [Source:MGI Symbol;Acc:MGI:1914884]	Mitochondrial ferritin limits oxidative damage regulating mitochondrial iron availability
chr5	77017864	77019863	2000	-	-0.556913	7.88079	11.0276	0.000897638	NR_077218	ENSMUSG00000086632	1700112J05Rik	RIKEN cDNA 1700112J05 gene [Source:MGI Symbol;Acc:MGI:3696786]	No known function
chr3	98159812	98161811	2000	+	-0.563945	8.21992	12.4983	0.000407332	NM_027665	ENSMUSG00000043468	Adam30	a disintegrin and metallopeptidase domain 30 [Source:MGI Symbol;Acc:MGI:1918328]	Not much info / This gene is testis-specific?
chr3	86001492	86003491	2000	-	-0.565572	7.57895	16.3822	5.17697e-05	NM_001001650	ENSMUSG00000049013	Prss48	protease, serine, 48 [Source:MGI Symbol;Acc:MGI:2685865]	No known function
chr3	10300184	10302183	2000	-	-0.569705	7.4214	12.7721	0.000351828	NM_029310	ENSMUSG00000027530	Fabp12	fatty acid binding protein 12 [Source:MGI Symbol;Acc:MGI:1922747]	Not much info
chr10	99758659	99760658	2000	-	-0.571191	8.02318	13.6713	0.000217758	NM_027945	ENSMUSG00000046934	Csl	citrate synthase like [Source:MGI Symbol;Acc:MGI:1919082]	not musch known / hard to descpiher between CS and CSL
chr8	113642213	113644212	2000	+	-0.572528	7.8235	11.3329	0.000761479	NM_001048145	ENSMUSG00000033409	Syce1l	synaptonemal complex central element protein 1 like [Source:MGI Symbol;Acc:MGI:1922247]	DUPLICATE DMR
chr8	113642213	113644212	2000	+	-0.572528	7.8235	11.3329	0.000761479	NM_029139	ENSMUSG00000033409	Syce1l	synaptonemal complex central element protein 1 like [Source:MGI Symbol;Acc:MGI:1922247]	Not much known / might be involved in meiosis (and hence mitosis?) /
chr8	113642213	113644212	2000	+	-0.572528	7.8235	11.3329	0.000761479	NM_001286494
chr2	32686767	32688766	2000	-	-0.572556	8.23897	11.9037	0.000560213	NR_106168
chr1	166998731	167000730	2000	-	-0.574757	7.62892	10.493	0.00119827	NR_037988	ENSMUSG00000097823	Gm16701	predicted gene, 16701 [Source:MGI Symbol;Acc:MGI:4439625]	No known function
chr3	95133013	95135012	2000	-	-0.576491	7.07372	10.4956	0.00119658	NM_001163573	ENSMUSG00000092607	Scnm1	sodium channel modifier 1 [Source:MGI Symbol;Acc:MGI:1341284]	Important in alternative splicing
chr3	95133013	95135012	2000	-	-0.576491	7.07372	10.4956	0.00119658	NM_027013	ENSMUSG00000092607	Scnm1	sodium channel modifier 1 [Source:MGI Symbol;Acc:MGI:1341284]	DUPLICATE DMR
chr14	51070443	51072442	2000	-	-0.581269	8.11691	10.9846	0.000918715	NM_207558	ENSMUSG00000035932	Olfr750	olfactory receptor 750 [Source:MGI Symbol;Acc:MGI:3030584]	not much info
chr3	153905139	153907138	2000	-	-0.581841	7.64991	10.2922	0.00133597	NM_031870	ENSMUSG00000005493	Msh4	mutS homolog 4 (E. coli) [Source:MGI Symbol;Acc:MGI:1860077]	DNA mismatch repair family/ acetylated upon DNA damage / reduce non-homol-end-join in response to IRR --> G2/M phase arrest	http://www.molecular-cancer.com/content/pdf/1476-4598-12-51.pdf	Chu Mol cancer 2013
chr5	137295689	137297688	2000	-	-0.583246	8.34262	13.4193	0.00024905	NR_106003
chr18	68950529	68952528	2000	-	-0.586906	7.85114	13.4214	0.000248773	NR_038051
chr6	39117350	39119349	2000	-	-0.587364	7.29524	13.9096	0.000191816	NM_172893	ENSMUSG00000038507	Parp12	poly (ADP-ribose) polymerase family, member 12 [Source:MGI Symbol;Acc:MGI:2143990]	not much specific for #12 - PARP inhibitors are being developed for use in a number of pathologies including cancer, diabetes, /troke and cardiovascular disease.
chr5	77114124	77116123	2000	-	-0.588599	7.18078	10.7789	0.00102664	NM_175606	ENSMUSG00000059325	Hopx	HOP homeobox [Source:MGI Symbol;Acc:MGI:1916782]	required to modulate cardiac growth and development / may act as tumor suppressor / interact with HDACs
chr10	3266772	3268771	2000	-	-0.589254	7.31602	11.1011	0.000862761	NM_001204916	ENSMUSG00000091618	H60c	histocompatibility 60c [Source:MGI Symbol;Acc:MGI:3774845]	Immune function
chr1	96996561	96998560	2000	-	-0.589298	6.49628	10.5798	0.00114333	NR_120500
chrX	118426235	118430234	4000	+	-0.592036	7.32018	10.3895	0.00126736	NM_153109	ENSMUSG00000061283	Tgif2lx1	TGFB-induced factor homeobox 2-like, X-linked 1 [Source:MGI Symbol;Acc:MGI:2387796]	testis associated
chr14	33953022	33955021	2000	+	-0.593894	7.57298	16.9513	3.83507e-05	NM_015745	ENSMUSG00000041534	Rbp3	retinol binding protein 3, interstitial [Source:MGI Symbol;Acc:MGI:97878]	primary function in eye!
chr7	45203893	45205892	2000	-	-0.595083	6.36135	10.2273	0.00138378	NM_201374	ENSMUSG00000038292	Ccdc155	coiled-coil domain containing 155 [Source:MGI Symbol;Acc:MGI:2687329]	not much info / GO annotations related to this gene include calcium ion binding
chr11	3355142	3357141	2000	-	-0.595756	6.91693	14.7329	0.000123865	NM_001034030	ENSMUSG00000020451	Limk2	LIM motif-containing protein kinase 2 [Source:MGI Symbol;Acc:MGI:1197517]	Limits cell proliferation / involved in RHO signalling - remodelling of actin cytoskeletal /	http://www.ncbi.nlm.nih.gov/pubmed/20190821
chr16	24528314	24530313	2000	+	-0.597333	7.90559	15.0559	0.000104373	NR_038091	ENSMUSG00000046440	Gm5564	predicted gene 5564 [Source:MGI Symbol;Acc:MGI:3645018]	No known function
chrX	118426227	118430226	4000	+	-0.598245	7.32322	10.5704	0.0011491	NM_001142750	ENSMUSG00000063242	Tgif2lx2	TGFB-induced factor homeobox 2-like, X-linked 2 [Source:MGI Symbol;Acc:MGI:3800824]	testis associated
chr18	61952075	61954074	2000	+	-0.599131	7.492	11.9663	0.000541716	NM_172628	ENSMUSG00000045629	Sh3tc2	SH3 domain and tetratricopeptide repeats 2 [Source:MGI Symbol;Acc:MGI:2444417]	been proposed to be an adapter or docking molecule /
chr9	119718033	119720032	2000	-	-0.599315	7.70196	11.3683	0.00074707	NM_001205321	ENSMUSG00000034533	Scn10a	sodium channel, voltage-gated, type X, alpha [Source:MGI Symbol;Acc:MGI:108029]	DUPLICATE DMR
chr9	119718033	119720032	2000	-	-0.599315	7.70196	11.3683	0.00074707	NM_009134	ENSMUSG00000034533	Scn10a	sodium channel, voltage-gated, type X, alpha [Source:MGI Symbol;Acc:MGI:108029]	cardiac function /
chr15	58388275	58390274	2000	-	-0.599517	6.82493	14.9597	0.000109829	NM_027211
chr3	95133088	95135087	2000	+	-0.601653	7.05511	10.8579	0.000983764	NM_153121	ENSMUSG00000053769	Lysmd1	LysM, putative peptidoglycan-binding, domain containing 1 [Source:MGI Symbol;Acc:MGI:1919409]	not much info
chr2	163546188	163548187	2000	+	-0.603165	7.57505	12.1054	0.000502751	NM_008261	ENSMUSG00000017950	Hnf4a	hepatic nuclear factor 4, alpha [Source:MGI Symbol;Acc:MGI:109128]	Transcription factor / mutation associated with monogenic form of diabetes /
chr12	36089379	36091378	2000	+	-0.604632	8.08509	15.1207	0.000100853	NR_003649
chr9	83947781	83949780	2000	+	-0.605092	8.20335	10.3935	0.00126459	NM_199195	ENSMUSG00000032263	Bckdhb	branched chain ketoacid dehydrogenase E1, beta polypeptide [Source:MGI Symbol;Acc:MGI:88137]	associated with the inner membrane of mitochondria / branched-chain amino acids /ene encodes the E1 beta subunit,
chr11	70518209	70520208	2000	+	-0.611681	7.24997	14.1249	0.000171066	NM_146020	ENSMUSG00000046811	Gltpd2	glycolipid transfer protein domain containing 2 [Source:MGI Symbol;Acc:MGI:2444527]	no functional annotation - GO annotations related to this gene include glycolipid transporter activity and glycolipid binding
chr10	19166238	19168237	2000	+	-0.611828	6.97911	13.9453	0.000188207	NR_038022
chr12	106715325	106717324	2000	-	-0.615545	7.32506	11.5634	0.000672645	NR_015512	ENSMUSG00000085820	4933406K04Rik	RIKEN cDNA 4933406K04 gene [Source:MGI Symbol;Acc:MGI:1918283]	No known function
chr4	88772834	88778833	6000	+	-0.615992	8.78072	12.6089	0.000383915	NM_001243155	ENSMUSG00000094271	Gm13290	predicted gene 13290 [Source:MGI Symbol;Acc:MGI:3701990]	No known function
chr4	88772834	88778833	6000	+	-0.615992	8.78072	12.6089	0.000383915	NM_001243165	ENSMUSG00000096582	Gm13289	predicted gene 13289 [Source:MGI Symbol;Acc:MGI:3701987]	No known function
chr14	78628291	78630290	2000	-	-0.616198	7.8454	10.6811	0.00108238	NM_001253766
chr14	78628291	78630290	2000	-	-0.616198	7.8454	10.6811	0.00108238	NM_001281794
chr3	121642486	121644485	2000	-	-0.616581	6.36177	11.0037	0.000909304	NR_036457
chr3	121642486	121644485	2000	-	-0.616581	6.36177	11.0037	0.000909304	NR_036456
chr14	24489681	24491680	2000	+	-0.621558	6.94016	18.1038	2.09189e-05	NM_207634	ENSMUSG00000025290	Rps24	ribosomal protein S24 [Source:MGI Symbol;Acc:MGI:98147]	DUPLICATE DMR
chr14	24489681	24491680	2000	+	-0.621558	6.94016	18.1038	2.09189e-05	NM_011297	ENSMUSG00000025290	Rps24	ribosomal protein S24 [Source:MGI Symbol;Acc:MGI:98147]	linked to 18S abundance /
chr14	24489681	24491680	2000	+	-0.621558	6.94016	18.1038	2.09189e-05	NM_207635
chr7	30564427	30566426	2000	+	-0.623821	7.91083	11.0416	0.000890877	NM_145580	ENSMUSG00000036826	Igflr1	IGF-like family receptor 1 [Source:MGI Symbol;Acc:MGI:3655979]	not much info / IGFL1 belongs to the insulin-like growth factor (IGF; see MIM 147440) family of signaling molecules that play critical roles in cellular energy metabolism and in growth and development,
chr8	22161495	22163494	2000	-	-0.623836	6.97731	14.4209	0.000146168	NM_001162947	ENSMUSG00000031478	Nek3	NIMA (never in mitosis gene a)-related expressed kinase 3 [Source:MGI Symbol;Acc:MGI:1344371]	A.K.A Glycogen Synthase A Kinase / microtubuli acetylation / cytoskeleton regulation /
chr9	105808649	105810648	2000	-	-0.62412	7.91551	10.8567	0.000984366	NM_172927	ENSMUSG00000043719	Col6a6	collagen, type VI, alpha 6 [Source:MGI Symbol;Acc:MGI:2444259]	Collagen important in muscle function / α6 chain was dramatically up-regulated in fibrotic areas = marker of fibrogenesis? /	http://www.ncbi.nlm.nih.gov/pubmed/22226732
chr17	89199676	89201675	2000	-	-0.624647	7.21731	11.7158	0.000619702	NM_013523	ENSMUSG00000032937	Fshr	follicle stimulating hormone receptor [Source:MGI Symbol;Acc:MGI:95583]	Doesnt make sense in Muscle!?
chr18	37643205	37645204	2000	-	-0.625904	6.82681	16.1486	5.85608e-05	NM_175770	ENSMUSG00000051316	Taf7	TAF7 RNA polymerase II, TATA box binding protein (TBP)-associated factor [Source:MGI Symbol;Acc:MGI:1346348]	transcription coactivator / part of transcription complex II
chr7	127603446	127605445	2000	-	-0.629178	7.49961	11.1331	0.000848	NR_027915
chr15	97054957	97056956	2000	-	-0.631277	7.86303	10.6069	0.00112666	NM_027052	ENSMUSG00000022464	Slc38a4	solute carrier family 38, member 4 [Source:MGI Symbol;Acc:MGI:1916604]	transports both cationic and neutral amino acids / primarily in liver?
chr8	123406082	123408081	2000	+	-0.631549	6.74886	11.4666	0.00070857	NM_008559	ENSMUSG00000074037	Mc1r	melanocortin 1 receptor [Source:MGI Symbol;Acc:MGI:99456]	mostly known as coat color determinant / evidence for impact on Ca signalling / stimulation increase fatty acid oxidation /	http://www.ncbi.nlm.nih.gov/pubmed/17127674
chr3	86137859	86139858	2000	-	-0.631848	7.77151	18.4937	1.70467e-05	NR_004417	ENSMUSG00000064984	Snord73a	small nucleolar RNA, C/D box U73A [Source:MGI Symbol;Acc:MGI:1321388]	no known function
chr13	95443832	95445831	2000	-	-0.632189	7.88543	13.0271	0.000307009	NM_198408	ENSMUSG00000021680	Crhbp	corticotropin releasing hormone binding protein [Source:MGI Symbol;Acc:MGI:88497]	Important in pregnancy?
chr10	20207439	20209438	2000	+	-0.63257	7.45614	12.0545	0.000516676	NM_001101561	ENSMUSG00000057841	Rpl32	ribosomal protein L32 [Source:MGI Symbol;Acc:MGI:98038]	subunit of 60S ribosomal unit
chr2	126617679	126619678	2000	-	-0.633073	6.95273	13.4283	0.000247863	NM_008230	ENSMUSG00000027360	Hdc	histidine decarboxylase [Source:MGI Symbol;Acc:MGI:96062]	PKA - ERK signalling / produce histamine / Histamine regulates several physiologic processes, including neurotransmission, gastric acid secretion,inflamation, and smooth muscle tone
chr4	116172372	116174371	2000	+	-0.635523	7.69149	10.481	0.00120605	NM_001099295	ENSMUSG00000078593	1700042G07Rik	RIKEN cDNA 1700042G07 gene [Source:MGI Symbol;Acc:MGI:1914573]	No known function
chr15	76068731	76070730	2000	-	-0.637174	6.89392	12.0033	0.000531051	NM_134089	ENSMUSG00000022568	Scrib	scribbled homolog (Drosophila) [Source:MGI Symbol;Acc:MGI:2145950]	tumor suppression pathways / scaffold protein involved in cell polarization processes /
chr5	66190336	66192335	2000	-	-0.639268	7.03507	10.353	0.00129265	NR_040695
chr18	9618470	9620469	2000	-	-0.639772	7.54272	17.4338	2.97486e-05	NM_007593	ENSMUSG00000050996	Cetn1	centrin 1 [Source:MGI Symbol;Acc:MGI:1347086]	increase proliferation of breast cancer / important roles in the determination of centrosome position and segregation, and in the process of microtubule severing
chr3	153903892	153905891	2000	-	-0.641509	7.40839	16.5531	4.73066e-05	NM_001282054
chr1	9600267	9602266	2000	+	-0.64544	7.42353	10.3812	0.00127304	NM_178399	ENSMUSG00000067879	3110035E14Rik	RIKEN cDNA 3110035E14 gene [Source:MGI Symbol;Acc:MGI:1924232]	No known function
chr13	29015255	29017254	2000	+	-0.647678	7.37735	11.0012	0.000910542	NR_045075	ENSMUSG00000086363	A330102I10Rik	RIKEN cDNA A330102I10 gene [Source:MGI Symbol;Acc:MGI:1925170]	No known function
chr13	29015255	29017254	2000	+	-0.647678	7.37735	11.0012	0.000910542	NR_045073	ENSMUSG00000086363	A330102I10Rik	RIKEN cDNA A330102I10 gene [Source:MGI Symbol;Acc:MGI:1925170]	No known function
chr13	29015255	29017254	2000	+	-0.647678	7.37735	11.0012	0.000910542	NR_045074
chr13	43715791	43717790	2000	+	-0.64772	7.3815	10.6672	0.0010905	NR_046022
chr19	47936712	47938711	2000	+	-0.647988	6.74147	13.3354	0.000260441	NM_001163267	ENSMUSG00000046585	Ccdc147	coiled-coil domain containing 147 [Source:MGI Symbol;Acc:MGI:2685815]	No known function
chr19	5608708	5610707	2000	-	-0.648174	6.9406	11.635	0.000647226	NR_037603
chr12	109709694	109711693	2000	-	-0.648716	7.04364	12.5381	0.000398732	NR_049185
chr12	109709638	109711637	2000	+	-0.649375	7.03	12.6333	0.000378934	NR_029650	ENSMUSG00000093291	Gm25400	predicted gene, 25400 [Source:MGI Symbol;Acc:MGI:5455177]	No known function
chr11	62728094	62730093	2000	-	-0.652363	6.4787	13.1999	0.000279968	NM_133208	ENSMUSG00000005267	Zfp287	zinc finger protein 287 [Source:MGI Symbol;Acc:MGI:2176561]	Expressed in immune cells / takes part in immune response
chr4	115646706	115648705	2000	-	-0.653745	6.31768	10.3041	0.00132734	NM_007823	ENSMUSG00000028713	Cyp4b1	cytochrome P450, family 4, subfamily b, polypeptide 1 [Source:MGI Symbol;Acc:MGI:103225]	The cytochrome P450 proteins are monooxygenases which catalyze many reactions involved in drug metabolism and synthesis of cholesterol, steroids and other lipids /
chr14	21741880	21743879	2000	-	-0.656641	6.75542	11.2902	0.000779186	NM_013849	ENSMUSG00000021768	Dusp13	dual specificity phosphatase 13 [Source:MGI Symbol;Acc:MGI:1351599]	A and B isoform - check which one! / regulate proliferation and differentiation / specific in testis B and skeletal muscle A / inhibits stress activated MAPKs	http://www.ncbi.nlm.nih.gov/pubmed/21360282
chr19	55701205	55703204	2000	-	-0.658019	7.49475	13.4921	0.000239573	NR_045318	ENSMUSG00000097632	4930552P12Rik	RIKEN cDNA 4930552P12 gene [Source:MGI Symbol;Acc:MGI:1924844]	No known function
chr6	50595591	50597590	2000	-	-0.659052	6.60211	13.3218	0.000262333	NM_027564	ENSMUSG00000029828	4921507P07Rik	RIKEN cDNA 4921507P07 gene [Source:MGI Symbol;Acc:MGI:1918071]	No known function
chr1	134802722	134804721	2000	-	-0.660069	6.60054	10.46	0.00121984	NR_015606	ENSMUSG00000073557	Ppp1r12b	protein phosphatase 1, regulatory (inhibitor) subunit 12B [Source:MGI Symbol;Acc:MGI:1916417]	A.K.A - Myosin phosphotase / Augments Ca(2+) sensitivity of the contractile apparatus / KO decrease CA sensitivity /
chr15	38218203	38220202	2000	+	-0.664574	7.11911	11.4262	0.000724158	NM_008757	ENSMUSG00000061923	Odf1	outer dense fiber of sperm tails 1 [Source:MGI Symbol;Acc:MGI:97424]	testis associated
chr2	181423389	181425388	2000	-	-0.666937	6.88469	10.6607	0.00109437	NM_027656	ENSMUSG00000027583	Zbtb46	zinc finger and BTB domain containing 46 [Source:MGI Symbol;Acc:MGI:1919397]	No known function
chr3	17947444	17949443	2000	+	-0.669543	6.84288	11.3089	0.000771358	NM_029289	ENSMUSG00000027564	Cypt12	cysteine-rich perinuclear theca 12 [Source:MGI Symbol;Acc:MGI:1922689]	No known function
chr11	91576556	91578555	2000	-	-0.670142	8.33441	11.4202	0.000726483	NM_028547	ENSMUSG00000046755	Kif2b	kinesin family member 2B [Source:MGI Symbol;Acc:MGI:1920720]	important in mitosis - separation of chromosomes /
chr8	95054103	95056102	2000	+	-0.670545	7.24643	10.7633	0.00103534	NM_001042715	ENSMUSG00000031786	Ccdc135	coiled-coil domain containing 135 [Source:MGI Symbol;Acc:MGI:2685616]	no known function
chr6	87428002	87430001	2000	+	-0.673825	7.49693	12.7483	0.000356328	NM_009756	ENSMUSG00000030046	Bmp10	bone morphogenetic protein 10 [Source:MGI Symbol;Acc:MGI:1338820]	cardiac development / regulate negative cell cycle regulator CDKN1C / decreased expression in breast cancer leads to more aggresive cancer /
chr15	80571597	80573596	2000	+	-0.674419	7.53705	20.0928	7.37743e-06	NM_001289442
chr7	100963367	100965366	2000	-	-0.678336	6.47106	10.6481	0.00110182	NM_183168	ENSMUSG00000048779	P2ry6	pyrimidinergic receptor P2Y, G-protein coupled, 6 [Source:MGI Symbol;Acc:MGI:2673874]	This receptor, which is a G-protein coupled receptor, is responsive to UDP, partially responsive to UTP and ADP, and not responsive to ATP./
chr17	48315162	48317161	2000	+	-0.679628	7.03673	10.3962	0.00126278	NM_177083	ENSMUSG00000043740	B430306N03Rik	RIKEN cDNA B430306N03 gene [Source:MGI Symbol;Acc:MGI:2443478]	No known function
chr3	122800981	122802980	2000	-	-0.680291	6.46576	12.8782	0.00033243	NR_045168
chr14	87140115	87142114	2000	-	-0.681608	6.84483	12.6563	0.000374304	NM_019670	ENSMUSG00000022021	Diap3	diaphanous homolog 3 (Drosophila) [Source:MGI Symbol;Acc:MGI:1927222]	actin remodeling and regulate cell movement and adhesion
chr9	109058724	109060723	2000	-	-0.681818	7.25445	10.4576	0.00122148	NM_011637	ENSMUSG00000049734	Trex1	three prime repair exonuclease 1 [Source:MGI Symbol;Acc:MGI:1328317]	DNA damage repair --> interacts with PARP / proofreading function for DNA polymerase? /
chr2	69711607	69713606	2000	-	-0.682839	7.30666	11.1708	0.00083095	NM_177244	ENSMUSG00000027086	Fastkd1	FAST kinase domains 1 [Source:MGI Symbol;Acc:MGI:2444596]	not much known
chr4	43750859	43752858	2000	+	-0.683261	8.1205	10.2638	0.00135668	NR_040667	ENSMUSG00000086864	A630077J23Rik	RIKEN cDNA A630077J23 gene [Source:MGI Symbol;Acc:MGI:2443089]	No known function
chr7	79272266	79274265	2000	+	-0.684683	6.44719	10.77	0.00103159	NM_018811	ENSMUSG00000039202	Abhd2	abhydrolase domain containing 2 [Source:MGI Symbol;Acc:MGI:1914344]	No known function
chr14	51987830	51989829	2000	-	-0.685026	8.03292	11.6431	0.000644415	NR_045728	ENSMUSG00000097633	Gm16617	predicted gene, 16617 [Source:MGI Symbol;Acc:MGI:4439541]	No known function
chr8	125491711	125493710	2000	-	-0.685514	7.7648	17.1224	3.50469e-05	NM_001081337	ENSMUSG00000001995	Sipa1l2	signal-induced proliferation-associated 1 like 2 [Source:MGI Symbol;Acc:MGI:2676970]	Gtpase activity / upregulated in reponse to air polutans in cell lines
chr19	58697917	58699916	2000	+	-0.687803	6.8956	15.4165	8.62329e-05	NR_038140
chr10	124468074	124470073	2000	+	-0.688158	8.15959	10.394	0.00126422	NR_028310
chr7	30980921	30982920	2000	+	-0.688328	6.45912	10.4601	0.00121981	NM_001242647
chr17	56299287	56301286	2000	-	-0.689791	7.09571	10.3314	0.00130785	NM_029799	ENSMUSG00000073380	Arrdc5	arrestin domain containing 5 [Source:MGI Symbol;Acc:MGI:1924170]	No known function
chr13	80963074	80965073	2000	+	-0.690083	6.93228	12.3627	0.000438	NR_015587	ENSMUSG00000097098	9330111N05Rik	RIKEN cDNA 9330111N05 gene [Source:MGI Symbol;Acc:MGI:2443112]	No known function
chrX	53775395	53777394	2000	-	-0.691582	7.72251	10.4738	0.00121079	NM_001009549	ENSMUSG00000059334	Zfp36l3	zinc finger protein 36, C3H type-like 3 [Source:MGI Symbol;Acc:MGI:3525151]	no known function
chr1	90202980	90204979	2000	+	-0.692213	7.36022	12.3969	0.000430052	NM_007722	ENSMUSG00000044337	Ackr3	atypical chemokine receptor 3 [Source:MGI Symbol;Acc:MGI:109562]	a.k.a CXCR7 / expression increased throughout C2C12 differentiation --> CXCR4 reduction / plays role in AML proliferation / AKT and ERK signalling /	http://www.ncbi.nlm.nih.gov/pubmed/22766125
chr1	90202980	90204979	2000	+	-0.692213	7.36022	12.3969	0.000430052	NM_001271607
chr14	65967483	65969482	2000	+	-0.694003	6.73668	17.0404	3.65922e-05	NM_013492	ENSMUSG00000022037	Clu	clusterin [Source:MGI Symbol;Acc:MGI:88423]	secreted chaperone that can under some stress conditions also be found in the cell cytosol / cell death, tumor progression / Clu deficiency associated with poor response to HFD --> INS RES
chr8	105932863	105934862	2000	-	-0.69447	6.42995	12.3315	0.000445385	NM_023182	ENSMUSG00000031896	Ctrl	chymotrypsin-like [Source:MGI Symbol;Acc:MGI:88558]	GO annotations related to this gene include serine-type endopeptidase activity / not much known
chr1	65925522	65927521	2000	+	-0.695298	6.24578	10.4946	0.00119724	NM_027010	ENSMUSG00000025945	Crygf	crystallin, gamma F [Source:MGI Symbol;Acc:MGI:88526]	Pseudogene in gene cluster?
chr15	74840644	74842643	2000	-	-0.696149	6.04714	10.6119	0.0011236	NM_001033229	ENSMUSG00000075604	Cyp11b1	cytochrome P450, family 11, subfamily b, polypeptide 1 [Source:MGI Symbol;Acc:MGI:88583]	mitochondrial inner membrane and is involved in the conversion of progesterone to cortisol in the adrenal cortex.
chr1	85893510	85895509	2000	+	-0.696175	6.22683	12.7594	0.000354219	NM_022417	ENSMUSG00000026223	Itm2c	integral membrane protein 2C [Source:MGI Symbol;Acc:MGI:1927594]	not much info
chr19	53037655	53039654	2000	-	-0.696671	6.45445	13.72	0.000212187	NM_133216	ENSMUSG00000025027	Xpnpep1	X-prolyl aminopeptidase (aminopeptidase P) 1, soluble [Source:MGI Symbol;Acc:MGI:2180003]	cytosolic form of a metalloaminopeptidase / maturation of tachykinins, neuropeptides, and peptide hormones
chr11	54369652	54371651	2000	+	-0.698404	7.38374	13.1024	0.000294911	NM_029105	ENSMUSG00000020332	4930404A10Rik	RIKEN cDNA 4930404A10 gene [Source:MGI Symbol;Acc:MGI:1922097]
chr9	15238045	15240044	2000	+	-0.699863	6.92447	11.2702	0.000787623	NM_026955	ENSMUSG00000031937	Vstm5	V-set and transmembrane domain containing 5 [Source:MGI Symbol;Acc:MGI:1916387]	No known function
chr12	109727129	109729128	2000	+	-0.704429	7.78295	10.6704	0.00108861	NR_030262	ENSMUSG00000076063	Mir539	microRNA 539 [Source:MGI Symbol;Acc:MGI:3619427]	Doesnt make sense in Promoters (Lars)
chrX	101058640	101060639	2000	-	-0.706422	7.68035	10.5703	0.00114916	NM_031384	ENSMUSG00000009670	Tex11	testis expressed gene 11 [Source:MGI Symbol;Acc:MGI:1933237]	N/A
chrX	101058640	101060639	2000	-	-0.706422	7.68035	10.5703	0.00114916	NM_001167997	ENSMUSG00000009670	Tex11	testis expressed gene 11 [Source:MGI Symbol;Acc:MGI:1933237]	N/A
chr6	139714859	139716858	2000	+	-0.70893	6.4624	11.9109	0.000558053	NM_207683	ENSMUSG00000030228	Pik3c2g	phosphatidylinositol 3-kinase, C2 domain containing, gamma polypeptide [Source:MGI Symbol;Acc:MGI:1203730]	Pi3K
chr15	100187037	100189036	2000	-	-0.711631	6.43439	10.2691	0.00135273	NR_037311	ENSMUSG00000092752	Mir3473	microRNA 3473 [Source:MGI Symbol;Acc:MGI:4441440]	Doesnt make sense in Promoters (Lars)
chr18	60811076	60813075	2000	+	-0.711885	7.49102	22.1185	2.56329e-06	NR_039567	ENSMUSG00000093327	Mir5107	microRNA 5107 [Source:MGI Symbol;Acc:MGI:4950427]	Doesnt make sense in Promoters (Lars)
chr18	12878980	12880979	2000	-	-0.712535	7.4614	11.0112	0.000905609	NM_001252489	ENSMUSG00000044252	Osbpl1a	oxysterol binding protein-like 1A [Source:MGI Symbol;Acc:MGI:1927551]	intracellular lipid receptors / strong binding to phosphatidic acid /regulates late endosome motility and function. /
chr18	12971252	12973251	2000	+	-0.715285	7.51761	13.7958	0.000203787	NM_008378	ENSMUSG00000024423	Impact	imprinted and ancient [Source:MGI Symbol;Acc:MGI:1098233]	Imprinted gene (mouse only) / Translational regulator that ensures constant high levels of translation under amino acid starvation /hereby preventing activation of GCN2 protein kinases (EIF2AK1 to 4) and subsequent down-regulation of protein synthesis
chrY	2899989	2901988	2000	+	-0.717921	7.88363	16.271	5.4897e-05	NM_001270511	ENSMUSG00000091987	Gm10352	predicted gene 10352 [Source:MGI Symbol;Acc:MGI:3708825]	no known function
chrY	2899989	2901988	2000	+	-0.717921	7.88363	16.271	5.4897e-05	NM_001270518	ENSMUSG00000094658	Rbmy	RNA binding motif protein, Y chromosome [Source:MGI Symbol;Acc:MGI:104732]	testis associated / ontogenic function /
chrY	2899989	2901988	2000	+	-0.717921	7.88363	16.271	5.4897e-05	NM_001270510	ENSMUSG00000094658	Rbmy	RNA binding motif protein, Y chromosome [Source:MGI Symbol;Acc:MGI:104732]	DUPLICATE DMR
chr19	10647054	10649053	2000	-	-0.719279	6.149	10.4715	0.0012123	NR_045316
chr10	31413436	31415435	2000	-	-0.719624	7.65343	11.2416	0.000799855	NM_011509
chr9	73932568	73934567	2000	-	-0.720898	8.03548	11.4628	0.000710026	NM_001081153	ENSMUSG00000062151	Unc13c	unc-13 homolog C (C. elegans) [Source:MGI Symbol;Acc:MGI:2149021]	May play a role in vesicle maturation during exocytosis as a target of the diacylglycerol second messenger pathway
chr18	58555240	58557239	2000	+	-0.722613	7.33098	17.3255	3.14932e-05	NM_001081072	ENSMUSG00000024600	Slc27a6	solute carrier family 27 (fatty acid transporter), member 6 [Source:MGI Symbol;Acc:MGI:3036230]	Fatty acid transporter /involved in the uptake of long-chain fatty acids
chr13	98636411	98638410	2000	-	-0.727648	8.37009	14.9423	0.00011085	NM_026685	ENSMUSG00000046082	Tmem174	transmembrane protein 174 [Source:MGI Symbol;Acc:MGI:1915594]	In kidney: activates AP-1 and promotes cell proliferation.
chr3	152265321	152267320	2000	-	-0.727683	6.93496	11.9798	0.000537803	NM_199465	ENSMUSG00000039103	Nexn	nexilin [Source:MGI Symbol;Acc:MGI:1916060]	Z-disc gene! / may function in cell adhesion and migration / structural constituent of muscle and actin filament binding / binds to IRS1 and2 and regulated insulin induced glucose transport /overexpression of nexilin inhibits transmission of IRS1 signals to AKT	http://www.ncbi.nlm.nih.gov/pubmed/23383252
chr2	168954588	168956587	2000	-	-0.733663	7.03816	10.2965	0.00133284	NM_009564	ENSMUSG00000027551	Zfp64	zinc finger protein 64 [Source:MGI Symbol;Acc:MGI:107342]	Not much info
chr11	97597511	97599510	2000	+	-0.734122	7.50231	15.0175	0.00010652	NR_045496	ENSMUSG00000085860	2410003L11Rik	RIKEN cDNA 2410003L11 gene [Source:MGI Symbol;Acc:MGI:1916979]	No known function
chr5	114129435	114131434	2000	+	-0.736363	6.57185	12.7842	0.000349555	NM_001040691	ENSMUSG00000029591	Ung	uracil DNA glycosylase [Source:MGI Symbol;Acc:MGI:109352]	encodes one of several uracil-DNA glycosylases / prevent mutagenesis by eliminating uracil from DNA molecules / base-excision repair /Uracil bases occur from cytosine deamination or misincorporation of dUMP residues.
chr3	48608101	48610100	2000	-	-0.736697	8.13523	12.7263	0.000360546	NR_003617
chr11	76678873	76680872	2000	+	-0.739319	6.60131	11.1912	0.000821852	NM_177709	ENSMUSG00000046275	Tusc5	tumor suppressor candidate 5 [Source:MGI Symbol;Acc:MGI:3029307]	more methylated in breast cancer / May be involved in fat metabolism --> activated by ppargamma / Highly expressed in 3T3	http://www.ncbi.nlm.nih.gov/pubmed/20204174
chr12	109709175	109711174	2000	+	-0.745337	7.60263	10.8578	0.000983802	NR_029916	ENSMUSG00000065477	Mir411	microRNA 411 [Source:MGI Symbol;Acc:MGI:3619399]	Doesnt make sense in Promoters (Lars)
chr6	52190704	52192703	2000	-	-0.750549	6.61963	11.2329	0.000803612	NM_008265	ENSMUSG00000000942	Hoxa4	homeobox A4 [Source:MGI Symbol;Acc:MGI:96176]	Development, myoloid malignancies,
chr2	109721921	109723920	2000	+	-0.750618	7.93498	12.1415	0.000493111	NM_001285422
chr4	141397100	141399099	2000	-	-0.750993	6.71927	11.0427	0.000890349	NM_001146307	ENSMUSG00000033770	Clcnka	chloride channel Ka [Source:MGI Symbol;Acc:MGI:1329026]	voltage sensitive channel / highly similar to CLCNKB /
chr2	120032433	120034432	2000	+	-0.753493	5.9498	10.4223	0.00124502	NM_145378	ENSMUSG00000098488	PLA2G4B	Cytosolic phospholipase A2 beta [Source:UniProtKB/Swiss-Prot;Acc:P0C871]	mitochondria and early endosomes / PLA is regulated by phosphorylation and by intracellular Ca2+ concentrations
chrX	106220159	106222158	2000	-	-0.753494	7.96509	13.8994	0.000192863	NM_001167988	ENSMUSG00000047242	Taf9b	TAF9B RNA polymerase II, TATA box binding protein (TBP)-associated factor [Source:MGI Symbol;Acc:MGI:3039562]
chr16	88562184	88564183	2000	-	-0.757518	7.64519	12.3747	0.000435199	NM_018778	ENSMUSG00000050520	Cldn8	claudin 8 [Source:MGI Symbol;Acc:MGI:1859286]	integral membrane proteins and components of tight junction strands /
chr18	38917700	38919699	2000	-	-0.75913	6.62964	10.6215	0.00111779	NM_010197	ENSMUSG00000036585	Fgf1	fibroblast growth factor 1 [Source:MGI Symbol;Acc:MGI:95515]	broad mitogenic and cell survival activities / functions as an angiogenic factor / It acts as a mitogen for a variety of mesoderm- and neuroectoderm-derived cells in vitro / potent insulin sensitizer.
chr1	180586201	180588200	2000	+	-0.759602	7.40947	18.2564	1.93077e-05	NR_105869
chr3	82875484	82877483	2000	-	-0.761079	7.4087	12.7931	0.000347899	NM_001277170	ENSMUSG00000033882	Rbm46	RNA binding motif protein 46 [Source:MGI Symbol;Acc:MGI:3645057]	GO annotations related to this gene include RNA binding and nucleotide binding
chr17	5417768	5419767	2000	-	-0.764255	8.55078	13.1116	0.000293469	NM_175349
chr9	68024715	68026714	2000	-	-0.765685	6.72335	16.4301	5.04772e-05	NR_045745		predicted gene
chr2	128125038	128127037	2000	+	-0.76634	6.99364	13.3347	0.000260541	NM_207681	ENSMUSG00000027381	Bcl2l11	BCL2-like 11 (apoptosis facilitator) [Source:MGI Symbol;Acc:MGI:1197519]	A.K.A Bim or bam or bod / act as an apoptotic activator
chr2	128125038	128127037	2000	+	-0.76634	6.99364	13.3347	0.000260541	NM_207680	ENSMUSG00000027381	Bcl2l11	BCL2-like 11 (apoptosis facilitator) [Source:MGI Symbol;Acc:MGI:1197519]	DUPLICATE DMR
chr2	128125038	128127037	2000	+	-0.76634	6.99364	13.3347	0.000260541	NM_009754	ENSMUSG00000027381	Bcl2l11	BCL2-like 11 (apoptosis facilitator) [Source:MGI Symbol;Acc:MGI:1197519]	DUPLICATE DMR
chr2	128125038	128127037	2000	+	-0.76634	6.99364	13.3347	0.000260541	NM_001291016
chrY	817713	819712	2000	+	-0.774641	6.4598	11.826	0.000584106	NM_011667	ENSMUSG00000069053	Uba1y	ubiquitin-activating enzyme, Chr Y [Source:MGI Symbol;Acc:MGI:98891]	No known function
chr1	158504625	158506624	2000	+	-0.775616	6.39918	12.6487	0.000375827	NR_030441	ENSMUSG00000070103	Mir488	microRNA 488 [Source:MGI Symbol;Acc:MGI:3629597]	Doesnt make sense in Promoters (Lars)
chr15	98455312	98457311	2000	+	-0.777766	8.31171	15.2561	9.38749e-05	NM_146280	ENSMUSG00000032987	Olfr281	olfactory receptor 281 [Source:MGI Symbol;Acc:MGI:3030115]	No known function
chr3	82875705	82877704	2000	+	-0.777894	7.39894	12.8571	0.000336209	NR_040382	ENSMUSG00000086273	4930564K09Rik	RIKEN cDNA 4930564K09 gene [Source:MGI Symbol;Acc:MGI:1925462]	No known function
chr6	36420742	36422741	2000	+	-0.779726	7.18243	16.0306	6.23285e-05	NR_030524	ENSMUSG00000070075	Mir490	microRNA 490 [Source:MGI Symbol;Acc:MGI:3629662]	Doesnt make sense in Promoters (Lars)
chr17	29346905	29348904	2000	-	-0.779842	6.41817	10.5741	0.00114686	NM_019880	ENSMUSG00000024012	Mtch1	mitochondrial carrier homolog 1 (C. elegans) [Source:MGI Symbol;Acc:MGI:1929261]	part of alternative apoptosis pathway induces apoptosis independent of the proapoptotic proteins Bax and Bak /	http://www.ncbi.nlm.nih.gov/pubmed/12377771
chr9	108391834	108393833	2000	+	-0.782016	8.2922	19.6633	9.23592e-06	NM_053216	ENSMUSG00000032611	1700102P08Rik	RIKEN cDNA 1700102P08 gene [Source:MGI Symbol;Acc:MGI:2148248]	No known function
chr2	89843972	89845971	2000	-	-0.782202	6.51944	11.3607	0.00075014	NM_010990	ENSMUSG00000075072	Olfr48	olfactory receptor 48 [Source:MGI Symbol;Acc:MGI:1333765]	No known function
chrX	136926325	136928324	2000	+	-0.788004	7.89272	12.8799	0.000332131	NM_027067	ENSMUSG00000048155	H2bfm	H2B histone family, member M [Source:MGI Symbol;Acc:MGI:1916639]	one of the core histone components
chr1	16664191	16666190	2000	+	-0.788818	6.62791	14.6842	0.000127105	NM_027415	ENSMUSG00000025940	Tmem70	transmembrane protein 70 [Source:MGI Symbol;Acc:MGI:1915068]	DUPLICATE DMR
chr1	16664191	16666190	2000	+	-0.788818	6.62791	14.6842	0.000127105	NM_026392	ENSMUSG00000025940	Tmem70	transmembrane protein 70 [Source:MGI Symbol;Acc:MGI:1915068]	mitochondrial membrane protein/ KO --> increased respiratory chain /
chr1	55361708	55363707	2000	-	-0.789722	7.50141	11.0579	0.000883112	NM_001113367	ENSMUSG00000025977	Boll	bol, boule-like (Drosophila) [Source:MGI Symbol;Acc:MGI:1922638]	meiotic G2/M transition /Mostly in sperm
chr3	138185714	138187713	2000	-	-0.789726	7.50699	15.0125	0.000106802	NM_001163386	ENSMUSG00000012042	4930579F01Rik	RIKEN cDNA 4930579F01 gene [Source:MGI Symbol;Acc:MGI:1914991]	N/A
chr3	138185714	138187713	2000	-	-0.789726	7.50699	15.0125	0.000106802	NM_001163385	ENSMUSG00000012042	4930579F01Rik	RIKEN cDNA 4930579F01 gene [Source:MGI Symbol;Acc:MGI:1914991]	N/A
chr1	23101254	23103253	2000	-	-0.791124	8.10928	12.0631	0.000514289	NM_025746	ENSMUSG00000073730	4933415F23Rik	RIKEN cDNA 4933415F23 gene [Source:MGI Symbol;Acc:MGI:1914005]	No known function
chr12	72184030	72186029	2000	-	-0.792948	7.23097	15.8729	6.77423e-05	NM_028687	ENSMUSG00000021086	Ccdc175	coiled-coil domain containing 175 [Source:MGI Symbol;Acc:MGI:1921186]	NO KNOW FUNCTION
chrX	11298321	11312320	14000	+	-0.793884	8.90164	13.435	0.000246974	NM_001242950	ENSMUSG00000094904	Gm14476	predicted gene 14476 [Source:MGI Symbol;Acc:MGI:3710419]	No known function
chrX	11298321	11312320	14000	+	-0.793884	8.90164	13.435	0.000246974	NM_001242954	ENSMUSG00000095445	Gm14475	predicted gene 14475 [Source:MGI Symbol;Acc:MGI:3710416]	No known function
chrX	11298321	11312320	14000	+	-0.793884	8.90164	13.435	0.000246974	NM_001242951	ENSMUSG00000095655	Gm14479	predicted gene 14479 [Source:MGI Symbol;Acc:MGI:3649874]	No known function
chrX	11298321	11312320	14000	+	-0.793884	8.90164	13.435	0.000246974	NM_001242949	ENSMUSG00000096097	Gm14477	predicted gene 14477 [Source:MGI Symbol;Acc:MGI:3711280]	No known function
chr12	65224517	65226516	2000	+	-0.794184	8.5445	10.829	0.000999244	NM_027614	ENSMUSG00000035560	Wdr20b	WD repeat domain 20b [Source:MGI Symbol;Acc:MGI:1918198]	preserve and regulate the activity of the USP12-UAF1 deubiquitinating enzyme complex
chrX	11317286	11321285	4000	+	-0.794844	7.17541	11.2003	0.000817833	NM_001242953	ENSMUSG00000095810	Gm14478	predicted gene 14478 [Source:MGI Symbol;Acc:MGI:3711282]	No known function
chr6	24732245	24734244	2000	+	-0.800975	6.77573	12.3322	0.000445211	NM_028920	ENSMUSG00000029679	Hyal6	hyaluronoglucosaminidase 6 [Source:MGI Symbol;Acc:MGI:1921659]	No homolog in humans?
chrX	11307755	11315754	8000	+	-0.801435	8.15787	11.2727	0.000786544	NM_001242952	ENSMUSG00000095662	Gm14482	predicted gene 14482 [Source:MGI Symbol;Acc:MGI:3710577]	No known function
chr7	78912765	78914764	2000	+	-0.805463	6.17171	11.3266	0.000764029	NM_020583	ENSMUSG00000039236	Isg20	interferon-stimulated protein [Source:MGI Symbol;Acc:MGI:1928895]	a.k.a interferon stimulated exonuclease gene 20kDa / not much known
chr4	125503749	125507748	4000	+	-0.806731	8.57157	10.5176	0.00118243	NR_035409
chr4	125503749	125507748	4000	+	-0.806731	8.57157	10.5176	0.00118243	NR_109835
chr1	58209397	58211396	2000	+	-0.807733	7.51501	13.2995	0.000265474	NM_023631	ENSMUSG00000038242	Aox4	aldehyde oxidase 4 [Source:MGI Symbol;Acc:MGI:1919122]	no AOX4 in human /
chr7	78913235	78915234	2000	+	-0.809218	6.21769	12.0056	0.000530413	NM_001113527	ENSMUSG00000039236	Isg20	interferon-stimulated protein [Source:MGI Symbol;Acc:MGI:1928895]	a.k.a interferon stimulated exonuclease gene 20kDa / not much known
chr4	133194655	133196654	2000	+	-0.810933	6.18281	15.0779	0.000103165	NR_105984
chrX	11298257	11302256	4000	+	-0.812198	7.14379	11.9561	0.000544699	NM_001111037	ENSMUSG00000095208	Gm14483	predicted gene 14483 [Source:MGI Symbol;Acc:MGI:3714114]	No known function
chr2	92598707	92600706	2000	+	-0.817235	6.20082	14.8089	0.000118974	NM_023850	ENSMUSG00000027221	Chst1	carbohydrate (keratan sulfate Gal-6) sulfotransferase 1 [Source:MGI Symbol;Acc:MGI:1924219]	not much known
chr12	108604766	108606765	2000	+	-0.817647	6.44334	15.8218	6.95957e-05	NM_001163395	ENSMUSG00000021262	Evl	Ena-vasodilator stimulated phosphoprotein [Source:MGI Symbol;Acc:MGI:1194884]	actin polymerisation /
chr14	78307044	78309043	2000	-	-0.81848	6.57427	12.0368	0.000521599	NM_011613	ENSMUSG00000022015	Tnfsf11	tumor necrosis factor (ligand) superfamily, member 11 [Source:MGI Symbol;Acc:MGI:1100089]	Mostly in osteoblast development? / This protein was shown to activate antiapoptotic kinase AKT/PKB through a signaling complex involving SRC kinase and tumor necrosis factor receptor-associated factor (TRAF) 6
chr4	120771698	120773697	2000	-	-0.82165	6.4256	11.8014	0.000591867	NR_029602	ENSMUSG00000065409	Mir30e	microRNA 30e [Source:MGI Symbol;Acc:MGI:3619329]	Doesnt make sense in Promoters (Lars)
chrX	106218843	106220842	2000	-	-0.822507	7.33679	12.4203	0.000424696	NM_001001176	ENSMUSG00000047242	Taf9b	TAF9B RNA polymerase II, TATA box binding protein (TBP)-associated factor [Source:MGI Symbol;Acc:MGI:3039562]
chr1	55362470	55364469	2000	-	-0.824511	7.42522	10.9797	0.000921164	NM_029267	ENSMUSG00000025977	Boll	bol, boule-like (Drosophila) [Source:MGI Symbol;Acc:MGI:1922638]
chr11	59809080	59811079	2000	+	-0.827135	5.79111	11.1442	0.000842967	NR_045686	ENSMUSG00000087249	Gm16062	predicted gene 16062 [Source:MGI Symbol;Acc:MGI:3802162]	No known function
chr12	109716258	109718257	2000	+	-0.835468	7.75776	12.1708	0.000485431	NR_030261	ENSMUSG00000076241	Mir543	microRNA 543 [Source:MGI Symbol;Acc:MGI:3619432]	Doesnt make sense in Promoters (Lars)
chr16	31932851	31934850	2000	+	-0.837606	5.89002	11.051	0.00088638	NM_172822	ENSMUSG00000045625	Pigz	phosphatidylinositol glycan anchor biosynthesis, class Z [Source:MGI Symbol;Acc:MGI:2443822]	localized to the endoplasmic reticulum, and is involved in GPI anchor biosynthesis
chr1	132641859	132643858	2000	-	-0.839015	6.83605	20.3502	6.44878e-06	NM_001160316	ENSMUSG00000026442	Nfasc	neurofascin [Source:MGI Symbol;Acc:MGI:104753]	cell adhesion molecule with multiple IGcam and fibronectin domains /
chr9	54707313	54709312	2000	+	-0.83938	6.28717	11.6505	0.00064185	NR_045745		miRNA
chr9	20958889	20960888	2000	-	-0.840753	6.98846	14.1724	0.000166795	NM_001199432	ENSMUSG00000004099	Dnmt1	DNA methyltransferase (cytosine-5) 1 [Source:MGI Symbol;Acc:MGI:94912]
chr6	145933147	145935146	2000	+	-0.845853	6.57775	10.4931	0.00119822	NM_010656	ENSMUSG00000030255	Sspn	sarcospan [Source:MGI Symbol;Acc:MGI:1353511]	dystrophin-glycoprotein complex (DGC) / alternative name Kras Oncogene-Associated Gene / akt signalling / required for muscle regeneration / expression decreased in muscle dystrophy /
chr2	130274515	130276514	2000	+	-0.846072	6.41373	14.8241	0.000118019	NR_028547	ENSMUSG00000080610	Snord110	small nucleolar RNA, C/D box 110 [Source:MGI Symbol;Acc:MGI:3819517]	no known function
chr16	31877810	31879809	2000	+	-0.848852	5.63844	10.8156	0.0010065	NM_013900	ENSMUSG00000022780	Mfi2	antigen p97 (melanoma associated) identified by monoclonal antibodies 133.2 and 96.5 [Source:MGI Symbol;Acc:MGI:1353421]	members of the transferrin superfamily. T / identified as glycoprotein on cell surface of melanoma cells
chrX	58910461	58912460	2000	+	-0.851941	6.44062	12.1987	0.000478224	NM_023774	ENSMUSG00000046180	4930550L24Rik	RIKEN cDNA 4930550L24 gene [Source:MGI Symbol;Acc:MGI:1922602]	No known function
chrX	37513535	37515534	2000	+	-0.85223	6.40334	13.2914	0.000266619	NM_001039695	ENSMUSG00000079633	Rhox4d	reproductive homeobox 4D [Source:MGI Symbol;Acc:MGI:3613388]	no known function
chr7	73685564	73687563	2000	-	-0.852988	8.29883	15.4573	8.43908e-05	NR_033604
chr11	88203388	88205387	2000	+	-0.853736	6.32845	15.1655	9.84865e-05	NM_024174	ENSMUSG00000023723	Mrps23	mitochondrial ribosomal protein S23 [Source:MGI Symbol;Acc:MGI:1928138]	Ribosomal protein
chr11	88203388	88205387	2000	+	-0.853736	6.32845	15.1655	9.84865e-05	NM_001291271
chr11	88203388	88205387	2000	+	-0.853736	6.32845	15.1655	9.84865e-05	NM_001291272
chr11	88203388	88205387	2000	+	-0.853736	6.32845	15.1655	9.84865e-05	NM_001291273
chr11	88203388	88205387	2000	+	-0.853736	6.32845	15.1655	9.84865e-05	NR_111902
chr18	24529205	24531204	2000	-	-0.856073	5.95262	14.1957	0.000164749	NM_144861	ENSMUSG00000040446	Rprd1a	regulation of nuclear pre-mRNA domain containing 1A [Source:MGI Symbol;Acc:MGI:2385066]	RPRD1A and RPRD1B are human RNA polymerase II C-terminal domain scaffolds for Ser5 dephosphorylation. / upregulated in cells overexpressing cyclin-dependent kinase inhibitor p15(INK4b) (CDKN2B) and may have a role in cell cycle regulation/ May act as a negative regulator of cyclin-D1 (CCND1) and cyclin-E (CCNE1) in the cell cycle
chr9	51874886	51876885	2000	-	-0.863495	8.07467	17.7491	2.52035e-05	NR_033560	ENSMUSG00000074354	9230115E21Rik	RIKEN cDNA 9230115E21 gene [Source:MGI Symbol;Acc:MGI:3027124]	No known function
chr4	91372364	91374363	2000	-	-0.86425	7.02719	23.6019	1.18468e-06	NR_105828
chr4	134566852	134568851	2000	-	-0.865889	6.35597	17.1643	3.42815e-05	NR_105829
chr2	59017607	59019606	2000	-	-0.872957	6.29802	15.7012	7.41769e-05	NM_001001178	ENSMUSG00000036641	Ccdc148	coiled-coil domain containing 148 [Source:MGI Symbol;Acc:MGI:3039583]	Not much info
chr4	120771606	120773605	2000	+	-0.873391	6.37493	11.4555	0.000712841	NR_105851
chr12	109716085	109718084	2000	+	-0.875374	7.58339	14.11	0.000172428	NR_030435	ENSMUSG00000076272	Mir666	microRNA 666 [Source:MGI Symbol;Acc:MGI:3629901]	Doesnt make sense in Promoters (Lars)
chr9	48361041	48363040	2000	+	-0.879396	6.44513	21.5835	3.38746e-06	NM_172921	ENSMUSG00000044229	Nxpe4	neurexophilin and PC-esterase domain family, member 4 [Source:MGI Symbol;Acc:MGI:1924792]	no known function
chrX	157567986	157569985	2000	-	-0.880276	7.58553	16.9008	3.93841e-05	NM_001098723	ENSMUSG00000091736	Yy2	Yy2 transcription factor [Source:MGI Symbol;Acc:MGI:3837947]	YY1) is a critical transcription factor controlling cell proliferation, development and DNA damage responses
chrX	73242131	73244130	2000	-	-0.891615	6.15316	12.9463	0.000320552	NM_183094	ENSMUSG00000031362	Xlr4c	X-linked lymphocyte-regulated 4C [Source:MGI Symbol;Acc:MGI:3574099]	No known function - imprinted gene locus
chr19	18669780	18671779	2000	+	-0.892772	6.20599	14.3209	0.000154145	NM_026120	ENSMUSG00000024726	2410127L17Rik	RIKEN cDNA 2410127L17 gene [Source:MGI Symbol;Acc:MGI:1914633]	No Known function
chr7	144174520	144176519	2000	+	-0.906866	5.94463	12.4698	0.000413574	NM_001113373	ENSMUSG00000037541	Shank2	SH3/ankyrin domain gene 2 [Source:MGI Symbol;Acc:MGI:2671987]	may function as molecular scaffolds /
chr19	5405815	5407814	2000	+	-0.915189	6.96572	13.8801	0.000194851	NR_015545	ENSMUSG00000086938	4930481A15Rik	RIKEN cDNA 4930481A15 gene [Source:MGI Symbol;Acc:MGI:1922181]	No known function
chr19	5405815	5407814	2000	+	-0.915189	6.96572	13.8801	0.000194851	NR_027938
chr11	34782906	34784905	2000	-	-0.922291	6.47977	21.2551	4.02048e-06	NM_033374	ENSMUSG00000020143	Dock2	dedicator of cyto-kinesis 2 [Source:MGI Symbol;Acc:MGI:2149010]	Important for cytoskeleton remodelling in lymphocyte migration /
chr7	4469885	4471884	2000	-	-0.923697	6.66458	10.3343	0.00130578	NR_028416
chr5	124539791	124541790	2000	+	-0.929593	5.91004	15.9458	6.51828e-05	NM_019770	ENSMUSG00000029390	Tmed2	transmembrane emp24 domain trafficking protein 2 [Source:MGI Symbol;Acc:MGI:1929269]	vesicular protein trafficking /
chrX	134475491	134477490	2000	-	-0.929862	7.78646	14.9331	0.00011139	NM_028958	ENSMUSG00000009596	Taf7l	TAF7-like RNA polymerase II, TATA box binding protein (TBP)-associated factor [Source:MGI Symbol;Acc:MGI:1921719]	transcription factor complex TFIID / testis specific? /downregulated in acute myoloid leukemia
chr1	140655403	140657402	2000	-	-0.934494	7.72983	22.2548	2.38756e-06	NR_040604
chr12	59012393	59014392	2000	+	-0.954617	5.71169	10.5562	0.00115797	NM_025656	ENSMUSG00000060121	Gemin2	gem (nuclear organelle) associated protein 2 [Source:MGI Symbol;Acc:MGI:1913853]	Part of survival of motor neuron protein (SNM) complex required for assembly of spliceosomal snRNPs and for pre-mRNA splicing/ increased ecpression in moto neuron diseases	http://www.ncbi.nlm.nih.gov/pubmed/11943600
chr5	75109321	75111320	2000	+	-0.970211	6.70315	16.3831	5.17435e-05	NR_045792
chr17	35262123	35264122	2000	+	-0.985827	5.96423	14.6399	0.000130129	NM_001267808	ENSMUSG00000073411	H2-D1	histocompatibility 2, D region locus 1 [Source:MGI Symbol;Acc:MGI:95896]	Immune function
chrX	14210148	14212147	2000	+	-1.00605	6.11248	15.5296	8.12218e-05	NM_001034100	ENSMUSG00000061065	Gm5382	predicted gene 5382 [Source:MGI Symbol;Acc:MGI:3643774]	no known function
chr17	35262094	35264093	2000	+	-1.01753	6.14148	13.0321	0.000306199	NM_010380	ENSMUSG00000073411	H2-D1	histocompatibility 2, D region locus 1 [Source:MGI Symbol;Acc:MGI:95896]	Immune function
chr2	159946341	159948340	2000	+	-1.02598	7.67482	21.3964	3.73468e-06	NR_040498	ENSMUSG00000085198	4933416E03Rik	RIKEN cDNA 4933416E03 gene [Source:MGI Symbol;Acc:MGI:1918331]	No known function
chr12	24096270	24098269	2000	-	-1.03337	6.0522	16.8216	4.10643e-05	NM_001256489	ENSMUSG00000073158	9030624G23Rik	RIKEN cDNA 9030624G23 gene [Source:MGI Symbol;Acc:MGI:1914058]	No known function
chr8	94036040	94038039	2000	-	-1.04031	5.5056	10.7771	0.00102766	NM_026623	ENSMUSG00000031754	Nudt21	nudix (nucleoside diphosphate linked moiety X)-type motif 21 [Source:MGI Symbol;Acc:MGI:1915469]	one subunit of a cleavage factor required for 3' RNA cleavage and polyadenylation processing /
chr19	25671411	25673410	2000	+	-1.04273	5.50293	10.9155	0.000953609	NM_145831	ENSMUSG00000048138	Dmrt2	doublesex and mab-3 related transcription factor 2 [Source:MGI Symbol;Acc:MGI:1330307]	important in initiation of myogenesis!
chr16	4938586	4940585	2000	-	-1.05414	5.6734	13.2338	0.000274952	NR_037666	ENSMUSG00000097397	Gm16861	predicted gene, 16861 [Source:MGI Symbol;Acc:MGI:4439785]	No known function
chr9	105641995	105643994	2000	+	-1.05655	5.44943	13.1171	0.000292607	NM_001081309	ENSMUSG00000032571	Pik3r4	phosphatidylinositol 3 kinase, regulatory subunit, polypeptide 4, p150 [Source:MGI Symbol;Acc:MGI:1922919]	Pi3K
chr1	12717545	12719544	2000	+	-1.05697	5.93927	17.8886	2.34218e-05	NM_172294	ENSMUSG00000016918	Sulf1	sulfatase 1 [Source:MGI Symbol;Acc:MGI:2138563]	Extracellular sulfatases / implicated in cell motility / SULF reduction increase SC proliferation! /Involved in heparin binding growth factor signalling /	http://www.ncbi.nlm.nih.gov/pubmed/20442248	http://www.ncbi.nlm.nih.gov/pubmed/22865881
chr4	41123340	41125339	2000	-	-1.05835	5.54551	12.0231	0.00052546	NM_139236	ENSMUSG00000028430	Nol6	nucleolar protein family 6 (RNA-associated) [Source:MGI Symbol;Acc:MGI:2140151]	nucleolus is a dense subnuclear membraneless organelle
chr19	46074847	46076846	2000	+	-1.05893	6.88133	19.9378	8.00048e-06	NM_053086	ENSMUSG00000015176	Nolc1	nucleolar and coiled-body phosphoprotein 1 [Source:MGI Symbol;Acc:MGI:1918019]	Hepatitic C associated/ inc meth of nolc1 --> decreased exp --> hepatic carcinoma OBS: other ref show opposite / regulated by CREB / synthesis of rRNA / regulation of proliferation / Cd3
chr19	46074847	46076846	2000	+	-1.05893	6.88133	19.9378	8.00048e-06	NM_001039352	ENSMUSG00000015176	Nolc1	nucleolar and coiled-body phosphoprotein 1 [Source:MGI Symbol;Acc:MGI:1918019]
chr19	46074847	46076846	2000	+	-1.05893	6.88133	19.9378	8.00048e-06	NM_001039353	ENSMUSG00000015176	Nolc1	nucleolar and coiled-body phosphoprotein 1 [Source:MGI Symbol;Acc:MGI:1918019]
chr19	46074847	46076846	2000	+	-1.05893	6.88133	19.9378	8.00048e-06	NM_001039351	ENSMUSG00000015176	Nolc1	nucleolar and coiled-body phosphoprotein 1 [Source:MGI Symbol;Acc:MGI:1918019]
chr8	94036198	94038197	2000	+	-1.07779	5.50789	11.3411	0.000758116	NM_177767	ENSMUSG00000033009	Ogfod1	2-oxoglutarate and iron-dependent oxygenase domain containing 1 [Source:MGI Symbol;Acc:MGI:2442978]	DUPLICATE DMR
chr8	94036198	94038197	2000	+	-1.07779	5.50789	11.3411	0.000758116	NM_001093757	ENSMUSG00000033009	Ogfod1	2-oxoglutarate and iron-dependent oxygenase domain containing 1 [Source:MGI Symbol;Acc:MGI:2442978]	GO annotations related to this gene include oxidoreductase activity / translation control and stress granule formation / modulate eukrayotic translation initiation factor 2 phosphorylation /
chr11	87736565	87738564	2000	+	-1.07785	6.47648	14.4471	0.000144152	NM_009296	ENSMUSG00000020485	Supt4a	suppressor of Ty 4A [Source:MGI Symbol;Acc:MGI:107416]	No known function / S Cerevisia
chr16	23608919	23610918	2000	+	-1.08504	5.46668	13.2762	0.000268791	NM_023386	ENSMUSG00000033355	Rtp4	receptor transporter protein 4 [Source:MGI Symbol;Acc:MGI:1915025]	not much info
chr7	103450339	103452338	2000	+	-1.0898	6.59255	29.5136	5.55263e-08	NM_147094	ENSMUSG00000073949	Olfr606	olfactory receptor 606 [Source:MGI Symbol;Acc:MGI:3030440]	No known function
chr10	40301187	40303186	2000	-	-1.1116	6.56707	17.3833	3.05494e-05	NM_007444	ENSMUSG00000063953	Amd2	S-adenosylmethionine decarboxylase 2 [Source:MGI Symbol;Acc:MGI:1333111]	no human ortholog - only 1 isoform /
chr10	40301189	40303188	2000	-	-1.1116	6.56707	17.3833	3.05494e-05	NM_009665	ENSMUSG00000075232	Amd1	S-adenosylmethionine decarboxylase 1 [Source:MGI Symbol;Acc:MGI:88004]	The polyamines spermine, spermidine, and putrescine are low-molecular-weight aliphatic amines essential for cellular proliferation and tumor promotion
chr15	102989539	102991538	2000	+	-1.13296	6.70952	10.3993	0.00126065	NM_010466	ENSMUSG00000001657	Hoxc8	homeobox C8 [Source:MGI Symbol;Acc:MGI:96198]	Involved in cartilage differentiation /negative regulator of dif of osteoblast / reg of cell cycle progression /promote breast tumoregenesis /proliferation and apoptosis regulator
chr7	119759923	119761922	2000	+	-1.14802	6.1405	15.3669	8.85248e-05	NM_212442	ENSMUSG00000030935	Acsm3	acyl-CoA synthetase medium-chain family member 3 [Source:MGI Symbol;Acc:MGI:99538]	Not much specifically known of this isoform
chr7	119759923	119761922	2000	+	-1.14802	6.1405	15.3669	8.85248e-05	NM_212441	ENSMUSG00000030935	Acsm3	acyl-CoA synthetase medium-chain family member 3 [Source:MGI Symbol;Acc:MGI:99538]	DUPLICATE DMR
chr7	119759923	119761922	2000	+	-1.14802	6.1405	15.3669	8.85248e-05	NM_016870	ENSMUSG00000030935	Acsm3	acyl-CoA synthetase medium-chain family member 3 [Source:MGI Symbol;Acc:MGI:99538]	DUPLICATE DMR
chr19	3904231	3906230	2000	-	-1.38788	5.35938	11.2687	0.000788231	NM_016921	ENSMUSG00000001750	Tcirg1	T cell, immune regulator 1, ATPase, H+ transporting, lysosomal V0 protein A3 [Source:MGI Symbol;Acc:MGI:1350931]	ATPase, H+ transporting / 2 splice var. Different function /tumor cell invasiveness / ubiqutin pathways? / intracellular phagocytosis?
chr5	130170819	130172818	2000	+	-2.0139	4.42903	12.6547	0.000374627	NM_001199059	ENSMUSG00000025340	Rabgef1	RAB guanine nucleotide exchange factor (GEF) 1 [Source:MGI Symbol;Acc:MGI:1929459]	specific guanine nucleotide exchange factor (GEF) for RAB5
chrY	1285614	1287613	2000	-	-2.1012	4.66097	10.9903	0.000915905	NM_012008	ENSMUSG00000069045	Ddx3y	DEAD (Asp-Glu-Ala-Asp) box polypeptide 3, Y-linked [Source:MGI Symbol;Acc:MGI:1349406]	translation initiation, nuclear and mitochondrial splicing, and ribosome and spliceosome assembly / since X-linked involved in meiosis and gonade development

## Sheet: CpG Islands
seqnames	start	end	width	strand	logFC	logCPM	LR	PValue	annotation	geneChr	geneStart	geneEnd	geneLength	geneStrand	geneId	transcriptId	distanceToTSS	ENSEMBL	SYMBOL	GENENAME	Function
chr15	89557773	89558421	649	*	1.43106	6.64216	14.4978	0.000140323	3' UTR	chr15	89568326	89574585	6260	+	11434	uc007xhc.2	-10553	ENSMUSG00000022622	Acr	acrosin prepropeptide
chr2	131546053	131546433	381	*	1.04558	6.88491	10.0596	0.00151553	Exon (uc008mlu.1/11550, exon 2 of 2)	chr2	131545357	131562285	16929	-	11550	uc008mlu.1	16232	ENSMUSG00000027335	Adra1d	adrenergic receptor, alpha 1d
chr7	44852575	44852781	207	*	0.690892	7.68375	12.7297	0.000359896	5' UTR	chr7	44850007	44855421	5415	+	67605	uc009gre.2	2774	ENSMUSG00000011096	Akt1s1	AKT1 substrate 1 (proline-rich)
chr12	111274094	111275908	1815	*	1.69974	6.28839	9.91858	0.00163619	Promoter	chr12	111274674	111276426	1753	+	93835	uc007pcq.1	0	ENSMUSG00000021278	Amn	amnionless
chr7	19696588	19696990	403	*	-0.432177	9.00454	13.4071	0.000250677	Exon (uc009fmy.2/11816, exon 4 of 4)	chr7	19696244	19699166	2923	-	11816	uc009fmy.2	2578	ENSMUSG00000002985	Apoe	apolipoprotein E
chr18	64612237	64612503	267	*	-0.474729	8.97277	12.8475	0.000337922	Intron (uc008fem.1/54670, intron 27 of 27)	chr18	64528979	64661000	132022	-	54670	uc008fem.1	48763	ENSMUSG00000039529	Atp8b1	ATPase, class I, type 8B, member 1	ATPase / aminophospholipid-transporting ATPases /mostly hepatic?
chr15	74529232	74529538	307	*	1.71326	5.73186	10.4175	0.00124825	Exon (uc011zua.1/107831, exon 2 of 6)	chr15	74540818	74589464	48647	+	107831	uc007wcp.1	-11586	ENSMUSG00000034730	Bai1	brain-specific angiogenesis inhibitor 1
chr11	43490908	43491181	274	*	-0.417866	8.70332	10.0671	0.00150938	Exon (uc007imr.2/69183, exon 4 of 4)	chr11	43474306	43491525	17220	+	69183	uc007imr.2	16875	ENSMUSG00000046491	C1qtnf2	C1q and tumor necrosis factor related protein 2
chr8	69888982	69889537	556	*	1.09362	6.42672	9.87924	0.00167154	5' UTR	chr8	69880366	69887392	7027	-	68709	uc009lyb.2	-2145	ENSMUSG00000044006	Cilp2	cartilage intermediate layer protein 2
chr7	35117900	35120740	2841	*	1.74756	5.98506	14.4854	0.000141253	Promoter	chr7	35119293	35121931	2639	+	12606	uc009gjl.2	0	ENSMUSG00000034957	Cebpa	CCAAT/enhancer binding protein (C/EBP), alpha
chr15	35326488	35326847	360	*	1.99184	5.62491	11.509	0.000692595	Intron (uc007vmc.1/100126269, intron 2 of 2)	chr15	35307010	35328535	21526	-	100126269	uc007vmc.1	2047		BC048602	cDNA sequence BC048602
chr2	18698657	18699226	570	*	1.78478	5.76603	11.4988	0.000696427	Promoter	chr2	18699022	18749605	50584	+	381350	uc008ima.1	0	ENSMUSG00000037708	BC061194	cDNA sequence BC061194
chr3	31149709	31150224	516	*	2.04219	5.96575	19.7741	8.71558e-06	Promoter	chr3	31149920	31164326	14407	+	18417	uc008ovw.2	0	ENSMUSG00000037625	Cldn11	claudin 11
chr2	32708012	32708226	215	*	-0.562165	8.54706	15.2916	9.21239e-05	Exon (uc008jgn.2/107951, exon 5 of 5)	chr2	32705782	32710904	5123	-	107951	uc008jgn.2	2892	ENSMUSG00000009555	Cdk9	cyclin-dependent kinase 9 (CDC2-related kinase)	Proliferation
chrX	44789365	44790107	743	*	1.24315	6.42919	11.6545	0.000640476	Promoter	chrX	44786567	44790161	3595	-	245404	uc009tbh.2	796	ENSMUSG00000045284	Dcaf12l1	DDB1 and CUL4 associated factor 12-like 1
chr5	108660568	108661067	500	*	1.8492	5.65455	9.83307	0.00171402	Promoter	chr5	108647044	108660769	13726	-	110524	uc008yot.1	0	ENSMUSG00000004815	Dgkq	diacylglycerol kinase, theta
chr4	109979981	109980420	440	*	1.65091	5.85266	9.88837	0.00166326	Exon (uc008ucv.1/242620, exon 2 of 3)	chr4	109978025	109983684	5660	+	242620	uc008ucv.1	2395	ENSMUSG00000047143	Dmrta2	doublesex and mab-3 related transcription factor like family A2
chr7	141338838	141339055	218	*	1.62368	5.71161	9.12908	0.00251579	Promoter	chr7	141339002	141363016	24015	+	98845	uc009kkt.1	0	ENSMUSG00000025504	Eps8l2	EPS8-like 2
chr15	76002958	76004677	1720	*	1.51422	8.01325	21.6128	3.33609e-06	Exon (uc007wic.2/105732, exon 5 of 5)	chr15	76001092	76009498	8407	-	105732	uc007wic.2	6540	ENSMUSG00000046761	Fam83h	family with sequence similarity 83, member H
chr8	44951616	44951884	269	*	-0.420535	8.80586	9.26712	0.00233305	Exon (uc009lon.2/14107, exon 1 of 26)	chr8	44950208	45052257	102050	+	14107	uc009lon.2	1676	ENSMUSG00000070047	Fat1	FAT tumor suppressor homolog 1 (Drosophila)	ortholog of the Drosophila fat gene, which encodes a tumor suppressor essential for controlling cell proliferation during Drosophila development / cell communication
chr1	171063940	171065960	2021	*	0.824853	8.10836	12.3916	0.000431259	Distal Intergenic	chr1	171051169	171059403	8235	-	14131	uc007dmz.2	-6557	ENSMUSG00000059498	Fcgr3	Fc receptor, IgG, low affinity III
chr1	171079182	171081209	2028	*	0.898757	7.16109	10.932	0.000945199	Distal Intergenic	chr1	171051169	171059403	8235	-	14131	uc007dmz.2	-21806	ENSMUSG00000059498	Fcgr3	Fc receptor, IgG, low affinity III
chr1	170907404	170908171	768	*	2.01842	5.69871	13.4846	0.000240532	Exon (uc007dmp.1/435653, exon 5 of 6)	chr1	170907273	170912941	5669	-	435653	uc007dmp.1	5537	ENSMUSG00000070524	Fcrlb	Fc receptor-like B	Fc receptor-like B / Nothing specific / Autophagy / hypersensitivity
chr12	57542298	57543269	972	*	1.76705	5.80234	11.8402	0.000579652	Exon (uc007nps.1/15375, exon 2 of 2)	chr12	57540632	57546121	5490	-	15375	uc007nps.1	3823	ENSMUSG00000035451	Foxa1	forkhead box A1
chr19	16872321	16874653	2333	*	1.61747	5.92279	11.6405	0.000645328	Promoter	chr19	16872316	16873830	1515	-	14240	uc008gxc.1	0	ENSMUSG00000056829	Foxb2	forkhead box B2
chr4	46343395	46345541	2147	*	1.78036	5.98261	13.037	0.000305402	Promoter	chr4	46344194	46345309	1116	+	110805	uc008sto.1	0	ENSMUSG00000070990	Foxe1	forkhead box E1
chr1	136259770	136260914	1145	*	1.327	6.06608	9.51957	0.00203292	Promoter	chr1	136258914	136260873	1960	-	383563	uc011wsy.1	0	ENSMUSG00000052759	Gpr25	G protein-coupled receptor 25
chr7	57508993	57510156	1164	*	1.57066	6.02141	12.1899	0.000480485	Promoter	chr7	57407669	57510009	102341	-	110886	uc009heb.1	0	ENSMUSG00000055078	Gabra5	gamma-aminobutyric acid (GABA) A receptor, subunit alpha 5
chr18	11059070	11059297	228	*	1.5718	5.86883	10.3381	0.00130313	Exon (uc008ebk.1/14465, exon 3 of 7)	chr18	11052510	11057583	5074	+	14465	uc008ebj.1	6787	ENSMUSG00000005836	Gata6	GATA binding protein 6
chr6	110645761	110646300	540	*	1.77586	5.69571	10.7266	0.00105609	Promoter	chr6	110645598	111497090	851493	+	108073	uc009dds.1	702	ENSMUSG00000056755	Grm7	glutamate receptor, metabotropic 7
chr2	174284648	174285390	743	*	-0.420777	8.88534	10.4503	0.00122628	5' UTR	chr2	174284320	174296895	12576	+	14683	uc008oeq.1	1070	ENSMUSG00000027523	Gnas	GNAS (guanine nucleotide binding protein, alpha stimulating) complex locus
chr9	118559595	118559833	239	*	-0.5462	8.26724	10.1993	0.00140496	3' UTR	chr9	118555573	118582519	26947	+	54214	uc009rzv.1	4260	ENSMUSG00000038708	Golga4	golgi autoantigen, golgin subfamily a, 4
chr7	121392180	121393196	1017	*	1.95925	6.20252	18.5536	1.65191e-05	Promoter	chr7	121392296	121501768	109473	+	195646	uc009jnr.1	0	ENSMUSG00000046321	Hs3st2	heparan sulfate (glucosamine) 3-O-sulfotransferase 2	heparan sulfate (glucosamine) 3-O-sulfotransferase 2 / primarily brain?
chr9	55545461	55546720	1260	*	1.15327	7.2847	10.0389	0.00153266	3' UTR	chr9	55541149	55546178	5030	+	104360	uc009psm.1	5571	ENSMUSG00000032318	Isl2	insulin related protein 2 (islet 2)
chr8	92365567	92365890	324	*	0.709421	7.70611	9.98812	0.00157553	Distal Intergenic	chr8	92357796	92361456	3661	+	54352	uc009mub.1	8094	ENSMUSG00000031737	Irx5	Iroquois related homeobox 5 (Drosophila)
chr7	99468222	99469101	880	*	1.37575	6.32299	10.3102	0.00132297	5' UTR	chr7	99466004	99474020	8017	+	72184	uc009ilq.2	3097	ENSMUSG00000035298	Klhl35	kelch-like 35
chr15	102028123	102028430	308	*	1.48695	5.83396	9.20453	0.00241417	Promoter	chr15	102028216	102032026	3811	+	16668	uc007xuj.2	0	ENSMUSG00000023043	Krt18	keratin 18
chr4	136637248	136638059	812	*	1.60253	5.8031	9.38416	0.00218868	Exon (uc029vaa.1/242707, exon 8 of 8)	chr4	136622621	136632101	9481	+	242707	uc008vij.2	15438	ENSMUSG00000070683	Lactbl1	lactamase, beta-like 1
chr2	36103402	36104063	662	*	1.2913	6.37301	10.1665	0.00143015	Promoter	chr2	36081953	36104060	22108	-	16874	uc008jld.1	0	ENSMUSG00000026890	Lhx6	LIM homeobox protein 6
chr9	107901214	107901890	677	*	0.512128	8.55759	12.4929	0.000408496	Exon (uc009rnh.2/72825, exon 4 of 4)	chr9	107906889	107920383	13495	+	19882	uc009rni.1	-5675	ENSMUSG00000032584	Mst1r	macrophage stimulating 1 receptor (c-met-related tyrosine kinase)
chr2	164949195	164949837	643	*	1.65346	6.23547	15.8991	6.68119e-05	Exon (uc008nwt.1/17395, exon 3 of 13)	chr2	164948251	164955846	7596	+	17395	uc008nwt.1	1586	ENSMUSG00000017737	Mmp9	matrix metallopeptidase 9
chr19	6831102	6831499	398	*	-0.376737	9.16855	11.2139	0.000811887	Exon (uc008gja.1/56613, exon 13 of 18)	chr19	6829886	6829944	59	-	100628576	uc029tqw.1	-1555		Mir5046	microRNA 5046
chr15	80211359	80211956	598	*	-0.285947	9.76286	10.0874	0.00149283	Exon (uc007wvf.1/17309, exon 2 of 2)	chr15	80234080	80253349	19270	+	239555	uc007wvk.2	-22721	ENSMUSG00000022412	Mief1	mitochondrial elongation factor 1
chr10	80691140	80691432	293	*	-0.441364	8.84385	11.8357	0.000581043	Exon (uc007geh.1/208228, exon 2 of 4)	chr10	80685253	80701820	16568	-	208228	uc007geh.1	10680	ENSMUSG00000003348	Mob3a	MOB kinase activator 3A
chr17	47834158	47834650	493	*	2.07233	5.84753	17.0932	3.55894e-05	Promoter	chr17	47815332	47834691	19360	-	17240	uc008cwi.2	533	ENSMUSG00000032717	Mdfi	MyoD family inhibitor
chr15	77857700	77857945	246	*	1.11575	6.66135	10.8028	0.00101349	Distal Intergenic	chr15	77760589	77842115	81527	-	17886	uc007woc.1	-15830	ENSMUSG00000022443	Myh9	myosin, heavy polypeptide 9, non-muscle
chr7	64268391	64268615	225	*	0.762623	7.62954	12.8335	0.000340472	Exon (uc009hfp.2/17364, exon 8 of 8)	chr7	64287670	64303172	15503	+	233315	uc009hgc.1	-19279	ENSMUSG00000030522	Mtmr10	myotubularin related protein 10
chr15	11903852	11905677	1826	*	1.21917	6.3332	9.61414	0.00193085	Promoter	chr15	11839897	11905674	65778	-	18162	uc007vhe.1	0	ENSMUSG00000022206	Npr3	natriuretic peptide receptor 3
chr3	102011671	102013119	1449	*	1.6769	5.77898	10.4002	0.00126005	5' UTR	chr3	102010146	102015492	5347	+	18072	uc008qro.2	2973	ENSMUSG00000048540	Nhlh2	nescient helix loop helix 2
chr10	80471873	80472160	288	*	1.76293	5.73436	9.33276	0.00225094	Distal Intergenic	chr10	80494906	80517260	22355	+	246086	uc007gdn.1	-23033	ENSMUSG00000045518	Onecut3	one cut domain, family member 3
chr4	148271443	148272130	688	*	1.2206	6.76866	13.0292	0.000306674	Exon (uc008vum.1/242748, exon 2 of 21)	chr4	148236857	148258838	21982	-	242748	uc012dpo.1	-13292	ENSMUSG00000041544	Ptchd2	patched domain containing 2
chr6	115360968	115362226	1259	*	2.48684	5.7858	20.3892	6.31838e-06	Promoter	chr6	115361221	115490401	129181	+	19016	uc009dis.2	0	ENSMUSG00000000440	Pparg	peroxisome proliferator activated receptor gamma
chr18	35930381	35930853	473	*	1.81981	5.74012	11.2007	0.000817658	Distal Intergenic	chr18	35964835	36014716	49882	+	74002	uc008ena.2	-34454	ENSMUSG00000024347	Psd2	pleckstrin and Sec7 domain containing 2
chr10	112271837	112272249	413	*	1.77453	5.7773	11.2955	0.000776946	Exon (uc007hao.1/268345, exon 2 of 5)	chr10	112271123	112465874	194752	+	268345	uc007hao.1	1126	ENSMUSG00000035681	Kcnc2	potassium voltage gated channel, Shaw-related subfamily, member 2
chr13	65890421	65890884	464	*	0.681191	7.61385	10.0672	0.00150934	Distal Intergenic	chr13	66113453	66122836	9384	+	628709	uc011zbc.1	-223032	ENSMUSG00000095909	Gm10324	predicted gene 10324
chr14	122406528	122407139	612	*	1.75528	6.5037	26.2851	2.94559e-07	Promoter	chr14	122365679	122406743	41065	-	328479	uc007vaz.2	0	ENSMUSG00000064052	Gm5089	predicted gene 5089
chr13	55414821	55415130	310	*	0.791656	7.2528	9.22961	0.00238132	Promoter	chr13	55414688	55415232	545	-	75477	uc007qqu.1	411	ENSMUSG00000044444	Pfn3	profilin 3
chr17	24533197	24533842	646	*	0.81769	7.10408	11.3053	0.000772843	Promoter	chr17	24529054	24533747	4694	-	328778	uc008awu.2	0	ENSMUSG00000079657	Rab26	RAB26, member RAS oncogene family
chr17	47468358	47468798	441	*	0.974891	6.86928	11.7509	0.000608139	Exon (uc008cvg.2/224833, exon 4 of 5)	chr17	47412734	47437375	24642	-	75462	uc008cve.2	-31423	ENSMUSG00000047150	1700001C19Rik	RIKEN cDNA 1700001C19 gene
chr12	57575939	57576606	668	*	1.26227	6.5166	10.627	0.00111446	Exon (uc007npt.1/70846, exon 2 of 5)	chr12	57564115	57622109	57995	+	70846	uc007npt.1	12491	ENSMUSG00000046782	4921506M07Rik	RIKEN cDNA 4921506M07 gene
chr2	9882254	9883100	847	*	1.29454	6.401	12.7543	0.000355199	Exon (uc008ihh.2/381347, exon 3 of 5)	chr2	9881246	9886767	5522	+	381347	uc008ihh.2	1854		4930412O13Rik	RIKEN cDNA 4930412O13 gene
chr2	152092957	152093939	983	*	1.07421	6.42899	9.21724	0.00239747	3' UTR	chr2	152081529	152095802	14274	+	545474	uc012cgb.1	12410	ENSMUSG00000060257	Scrt2	scratch homolog 2, zinc finger protein (Drosophila)
chr11	117332159	117332683	525	*	0.772105	7.13138	9.63387	0.00191022	Promoter	chr11	117332313	117362325	30013	+	53860	uc007mng.2	0	ENSMUSG00000059248	Sept9	septin 9
chr18	78047216	78047654	439	*	1.6457	5.82066	9.77216	0.00177174	Exon (uc008fsb.1/620235, exon 4 of 6)	chr18	78043614	78057268	13655	-	620235	uc008fsb.1	10052	ENSMUSG00000091055	Siglec15	sialic acid binding Ig-like lectin 15
chr18	76858631	76860510	1880	*	1.95607	5.6774	11.4881	0.000700414	Exon (uc008fqq.1/664805, exon 2 of 9)	chr18	76856405	76900342	43938	+	664805	uc008fqq.1	4105	ENSMUSG00000091519	Skor2	SKI family transcriptional corepressor 2
chr19	41743087	41743875	789	*	1.3782	6.3123	13.4436	0.000245841	Promoter	chr19	41600257	41743856	143600	-	20562	uc008hmf.2	0	ENSMUSG00000025020	Slit1	slit homolog 1 (Drosophila)
chr5	113287113	113287528	416	*	1.75897	5.77227	10.789	0.00102106	Exon (uc008yud.2/52850, exon 4 of 25)	chr5	113243220	113280601	37382	-	52850	uc008yuc.2	-6927	ENSMUSG00000042216	Sgsm1	small G protein signaling modulator 1
chr11	72266200	72267320	1121	*	1.77367	5.66446	10.221	0.00138853	Promoter	chr11	72241994	72266604	24611	-	237831	uc007jym.2	0	ENSMUSG00000020805	Slc13a5	solute carrier family 13 (sodium-dependent citrate transporter), member 5
chr8	70892118	70892887	770	*	1.1303	7.74585	14.6482	0.000129558	Promoter	chr8	70882889	70892757	9869	-	114479	uc009mbz.2	0	ENSMUSG00000000792	Slc5a5	solute carrier family 5 (sodium iodide symporter), member 5
chr14	70191783	70192426	644	*	0.575027	8.47427	9.89691	0.00165557	Exon (uc007unk.1/20410, exon 12 of 21)	chr14	70195923	70203003	7081	-	20410	uc007unn.1	11220	ENSMUSG00000022091	Sorbs3	sorbin and SH3 domain containing 3
chr11	94485986	94486306	321	*	1.85027	5.8265	13.2114	0.000278254	Promoter	chr11	94478904	94485310	6407	-	217116	uc007kyt.1	-996	ENSMUSG00000020867	Spata20	spermatogenesis associated 20
chr2	32612301	32612626	326	*	-0.480009	8.76991	13.1426	0.000288665	Exon (uc008jga.1/50935, exon 2 of 5)	chr2	32608042	32616819	8778	+	50935	uc008jgg.1	4584	ENSMUSG00000026811	St6galnac6	ST6 (alpha-N-acetyl-neuraminyl-2,3-beta-galactosyl-1,3)-N-acetylgalactosaminide alpha-2,6-sialyltransferase 6
chr5	52368323	52368941	619	*	-0.393615	9.0759	11.1053	0.000860817	3' UTR	chr5	52363804	52369738	5935	+	20657	uc008xkl.1	5137	ENSMUSG00000072941	Sod3	superoxide dismutase 3, extracellular
chr13	49247725	49248279	555	*	1.11654	6.4084	9.81717	0.0017289	Promoter	chr13	49230831	49248163	17333	-	66329	uc007qiz.2	0	ENSMUSG00000021384	Susd3	sushi domain containing 3
chr16	89884772	89885231	460	*	-0.396113	9.11297	11.7881	0.000596105	Exon (uc007zvu.2/21844, exon 5 of 28)	chr16	89787111	89837875	50765	-	21844	uc007zvt.2	-47356	ENSMUSG00000002489	Tiam1	T cell lymphoma invasion and metastasis 1
chr2	61805054	61805900	847	*	1.71342	5.90848	12.4529	0.000417337	Exon (uc008jvd.1/21375, exon 1 of 6)	chr2	61804453	61814113	9661	+	21375	uc008jvd.1	1447	ENSMUSG00000035033	Tbr1	T-box brain gene 1
chr1	73907272	73907503	232	*	-0.618004	8.36448	14.5636	0.000135504	Downstream (2-3kb)	chr1	73910231	73937333	27103	-	21961	uc007blf.2	30061	ENSMUSG00000055322	Tns1	tensin 1
chr13	40728310	40728773	464	*	1.96708	6.08159	19.8088	8.55895e-06	Promoter	chr13	40721269	40728944	7676	-	21418	uc007qei.1	634	ENSMUSG00000021359	Tfap2a	transcription factor AP-2, alpha
chr2	167597343	167597800	458	*	1.62411	5.97229	13.0165	0.000308758	Intron (uc008nzz.1/uc008nzz.1, intron 2 of 3)	chr2	167607639	167632005	24367	-	66589	uc008oaa.1	34662	ENSMUSG00000078923	Ube2v1	ubiquitin-conjugating enzyme E2 variant 1
chr7	120597745	120598024	280	*	1.74597	5.6301	9.20228	0.00241714	Promoter	chr7	120597625	120598475	851	+	78552	uc012fta.1	399		E130201H02Rik	Y box protein 1 pseudogene
chrX	157568852	157569111	260	*	-0.641942	7.95435	10.7087	0.0010663	Promoter	chrX	157566119	157568985	2867	-	100073351	uc012hrb.1	0	ENSMUSG00000091736	Yy2	Yy2 transcription factor	(YY1) is a critical transcription factor controlling cell proliferation, development and DNA damage responses
chr8	108175168	108175431	264	*	-0.528198	8.78568	14.0035	0.000182466	Distal Intergenic	chr8	108714644	108961636	246993	+	11906	uc009nid.1	-539476	ENSMUSG00000038872	Zfhx3	zinc finger homeobox 3
chrX	58018706	58018950	245	*	1.82015	5.81204	13.1009	0.000295159	Distal Intergenic	chrX	58030628	58036630	6003	+	22773	uc009tho.1	-11922	ENSMUSG00000067860	Zic3	zinc finger protein of the cerebellum 3
chr4	145745013	145745849	837	*	1.09947	7.48673	19.552	9.7898e-06	Distal Intergenic	chr4	145781543	145831978	50436	+	70005	uc029vao.1	-36530		Znf41-ps	ZNF41, pseudogene
								68

## Sheet: CpG Shores
seqnames	start	end	width	strand	logFC	logCPM	LR	PValue	annotation	geneChr	geneStart	geneEnd	geneLength	geneStrand	geneId	transcriptId	distanceToTSS	ENSEMBL	SYMBOL	GENENAME	Function
chr14	16241146	16243145	2000	*	-0.546689	6.69297	12.3653	0.00043738	5' UTR	chr14	16238659	16243327	4669	-	71147	uc007sgw.1	2181	ENSMUSG00000021786	Oxsm	3-oxoacyl-ACP synthase, mitochondrial
chr11	84177324	84179323	2000	*	1.50875	4.4341	14.5326	0.000137758	Intron (uc007kqg.1/107476, intron 1 of 3)	chr11	84173318	84233808	60491	+	107476	uc007kqk.1	6005	ENSMUSG00000020532	Acaca	acetyl-Coenzyme A carboxylase alpha
chr2	58358053	58360052	2000	*	0.954994	5.26166	14.5514	0.000136388	Distal Intergenic	chr2	58267453	58357758	90306	-	269275	uc008jsp.2	-2294	ENSMUSG00000026834	Acvr1c	activin A receptor, type IC
chr2	174121228	174123227	2000	*	-0.743632	6.91174	12.1323	0.000495554	3' UTR	chr2	174110351	174122702	12352	+	228961	uc008oeo.2	12876	ENSMUSG00000039263	Npepl1	aminopeptidase-like 1
chr19	23893831	23895830	2000	*	-0.780225	7.48666	13.9753	0.000185232	Exon (uc008hai.1/319924, exon 2 of 13)	chr19	23917553	23921414	3862	+	319924	uc008haj.1	-23722	ENSMUSG00000024897	Apba1	amyloid beta (A4) precursor protein binding, family A, member 1
chr15	95791334	95793333	2000	*	-0.710798	6.45109	13.4293	0.00024772	Intron (uc007xju.2/105722, intron 1 of 19)	chr15	95790843	95975472	184630	+	105722	uc007xju.2	2490	ENSMUSG00000064210	Ano6	anoctamin 6
chr6	134981537	134983536	2000	*	-0.648378	6.44648	18.8173	1.43858e-05	Promoter	chr6	134982001	134986836	4836	+	381823	uc012euq.1	0	ENSMUSG00000090698	Apold1	apolipoprotein L domain containing 1	/Primiarily in endothelial cells ? / regulation of endothelial cell signaling and vascular function
chr5	24480374	24482373	2000	*	-0.746635	6.63453	11.792	0.000594848	3' UTR	chr5	24479631	24502047	22417	+	213990	uc008wrw.1	2742	ENSMUSG00000023353	Agap3	ArfGAP with GTPase domain, ankyrin repeat and PH domain 3
chr14	29978794	29980793	2000	*	-0.825052	6.9973	12.2481	0.000465728	Intron (uc007sum.2/56249, intron 1 of 12)	chr14	29978337	29993221	14885	+	56249	uc007sum.2	2456	ENSMUSG00000015971	Actr8	ARP8 actin-related protein 8
chr18	64612504	64614503	2000	*	-1.36426	5.90616	18.27	1.91702e-05	Intron (uc008fem.1/54670, intron 27 of 27)	chr18	64528979	64661000	132022	-	54670	uc008fem.1	48496	ENSMUSG00000039529	Atp8b1	ATPase, class I, type 8B, member 1	ATPase / aminophospholipid-transporting ATPases /mostly hepatic?
chr5	8913011	8915010	2000	*	-0.666212	7.44275	12.0869	0.000507769	Exon (uc008wkr.2/18670, exon 9 of 28)	chr5	8893949	8941114	47166	+	18670	uc008wks.1	21061	ENSMUSG00000042476	Abcb4	ATP-binding cassette, sub-family B (MDR/TAP), member 4
chr4	155832137	155834136	2000	*	-0.867044	6.06037	12.4872	0.000409741	3' UTR	chr4	155831269	155833098	1830	+	66077	uc008wey.2	2867	ENSMUSG00000065990	Aurkaip1	aurora kinase A interacting protein 1
chr2	118883657	118885656	2000	*	2.44993	3.92668	18.0972	2.09914e-05	Downstream (2-3kb)	chr2	118901615	118924524	22910	+	228536	uc008lsw.1	-17958	ENSMUSG00000040007	Bahd1	bromo adjacent homology domain containing 1
chr2	52676611	52678610	2000	*	-0.855293	6.28415	12.4827	0.000410739	Distal Intergenic	chr2	52428320	52676582	248263	-	12298	uc008jrd.1	-2028	ENSMUSG00000017412	Cacnb4	calcium channel, voltage-dependent, beta 4 subunit
chr6	77977430	77979429	2000	*	1.82289	4.0922	15.3446	8.95787e-05	5' UTR	chr6	76881637	77979667	1098031	-	12386	uc009cjq.2	2237	ENSMUSG00000063063	Ctnna2	catenin (cadherin associated protein), alpha 2
chr11	106320867	106322866	2000	*	-0.583561	7.07439	12.136	0.000494587	Exon (uc007lyu.1/110880, exon 22 of 24)	chr11	106311341	106314529	3189	-	15985	uc007lyt.2	-8337	ENSMUSG00000040592	Cd79b	CD79B antigen
chr3	89165253	89167252	2000	*	-0.888718	6.76698	13.1852	0.000282167	5' UTR	chr3	89164805	89177087	12283	+	12748	uc008pxt.2	2447	ENSMUSG00000068917	Clk2	CDC-like kinase 2	Supress haptic fatty acid oxid / Effect PGC1a / interact with AKT / regulates alternative splicing /
chr3	89167427	89169426	2000	*	-0.885988	6.88452	11.9682	0.000541152	5' UTR	chr3	89164805	89177087	12283	+	12748	uc008pxt.2	4621	ENSMUSG00000068917	Clk2	CDC-like kinase 2
chr3	89166712	89168711	2000	*	-0.808906	7.18617	11.6971	0.000625989	5' UTR	chr3	89164805	89177087	12283	+	12748	uc008pxt.2	3906	ENSMUSG00000068917	Clk2	CDC-like kinase 2
chr2	25458654	25460653	2000	*	-0.898473	5.76365	13.139	0.000289216	3' UTR	chr2	25459488	25461094	1607	-	227622	uc008ise.1	2440	ENSMUSG00000047617	BC029214	cDNA sequence BC029214
chr1	163992434	163994433	2000	*	1.61364	4.33217	14.9599	0.000109819	Intron (uc007dhu.1/381306, intron 23 of 23)	chr1	163954008	163994781	40774	-	381306	uc007dhu.1	2347	ENSMUSG00000041406	BC055324	cDNA sequence BC055324
chr2	131179865	131181864	2000	*	1.6786	4.10587	12.4892	0.000409303	Promoter	chr2	131177289	131180012	2724	-	12616	uc008mkx.1	0	ENSMUSG00000068267	Cenpb	centromere protein B
chr2	153052642	153054641	2000	*	-0.745852	6.73754	14.645	0.000129777	Exon (uc008nha.1/228787, exon 2 of 3)	chr2	153066002	153081735	15734	+	228788	uc012cgo.1	-13360	ENSMUSG00000027474	Ccm2l	cerebral cavernous malformation 2-like
chr4	135216473	135218472	2000	*	-0.657666	7.14985	12.6337	0.000378845	3' UTR	chr4	135213970	135272760	58791	-	29876	uc008vgd.1	56287	ENSMUSG00000037242	Clic4	chloride intracellular channel 4 (mitochondrial)
chr3	95882939	95884938	2000	*	2.14763	4.01162	12.5054	0.00040578	3' UTR	chr3	95878505	95882228	3724	-	229599	uc008qlm.1	-2710	ENSMUSG00000038550	Ciart	circadian associated repressor of transcription
chr16	58728351	58730350	2000	*	-0.766937	6.98452	12.1213	0.000498503	5' UTR	chr16	58727910	58734247	6338	+	224250	uc007zoc.2	2440	ENSMUSG00000022744	Cldn25	claudin 25
chr12	21286627	21288626	2000	*	1.58936	4.42953	12.7272	0.000360382	Intron (uc007ndo.2/54451, intron 1 of 12)	chr12	21286297	21308234	21938	+	54451	uc007ndo.2	2329	ENSMUSG00000054309	Cpsf3	cleavage and polyadenylation specificity factor 3
chr17	29757954	29759953	2000	*	-0.869445	6.19962	14.7949	0.000119861	Distal Intergenic	chr17	29695977	29717017	21041	-	68597	uc008bti.2	-42936	ENSMUSG00000024018	Ccdc167	coiled-coil domain containing 167
chr11	22982374	22984373	2000	*	1.9954	4.1214	14.7576	0.000122253	Distal Intergenic	chr11	22899728	22982284	82557	-	17846	uc007iel.1	-2089	ENSMUSG00000051355	Commd1	COMM domain containing 1
chr17	46650944	46652943	2000	*	-0.749754	7.12707	12.701	0.000365464	5' UTR	chr17	46650572	46657221	6650	+	66515	uc008ctq.1	2371	ENSMUSG00000038545	Cul7	cullin 7
chr17	46650983	46652982	2000	*	-0.733743	7.2215	12.551	0.000395992	5' UTR	chr17	46650572	46657221	6650	+	66515	uc008ctq.1	2410	ENSMUSG00000038545	Cul7	cullin 7
chr17	24251746	24253745	2000	*	2.05264	3.74258	12.575	0.000390937	Distal Intergenic	chr17	24223232	24251409	28178	-	12449	uc008ave.1	-2336	ENSMUSG00000072082	Ccnf	cyclin F	Proliferation
chr7	143461478	143463477	2000	*	-0.681807	6.1627	17.3831	3.05529e-05	Distal Intergenic	chr7	143458339	143461050	2712	-	12577	uc009kpd.2	-2427	ENSMUSG00000037664	Cdkn1c	cyclin-dependent kinase inhibitor 1C (P57)	Imprinted gene/ strong inhibitor of several G1 cyclin/Cdk complexes and a negative regulator of cell / important in muscle dif - interacts with MyoD proliferation
chr15	99726126	99728125	2000	*	-0.624597	6.10405	12.0876	0.000507571	5' UTR	chr15	99725618	99728136	2519	+	66379	uc007xqe.2	2507	ENSMUSG00000023020	Cox14	cytochrome c oxidase assembly protein 14
chr7	43674592	43676591	2000	*	-0.695476	7.63156	12.2019	0.000477413	5' UTR	chr7	43672031	43678297	6267	+	233189	uc009gnh.1	4560	ENSMUSG00000038888	Ctu1	cytosolic thiouridylase subunit 1 homolog (S. pombe)
chr14	61690063	61692062	2000	*	-0.802952	6.00037	12.4865	0.00040991	Distal Intergenic	chr14	61602836	61682373	79538	-	668253	uc007ugb.2	-9689	ENSMUSG00000097589	Dleu2	deleted in lymphocytic leukemia, 2
chr15	57890028	57892027	2000	*	1.18388	4.86912	12.1411	0.000493214	Intron (uc007vsq.1/67819, intron 7 of 7)	chr15	57869502	57892418	22917	-	67819	uc007vsq.1	2390	ENSMUSG00000022365	Derl1	Der1-like domain family, member 1
chr11	69998406	70000405	2000	*	-0.564931	7.40499	12.8356	0.00034008	5' UTR	chr11	70000626	70006961	6336	+	13543	uc007jtl.1	-2220	ENSMUSG00000020888	Dvl2	dishevelled 2, dsh homolog (Drosophila)
chr16	4684337	4686336	2000	*	2.17372	3.68886	11.945	0.000547955	Exon (uc007yab.2/83945, exon 1 of 4)	chr16	4684070	4694245	10176	+	83945	uc007yab.2	2266	ENSMUSG00000004069	Dnaja3	DnaJ (Hsp40) homolog, subfamily A, member 3
chr14	21684626	21686625	2000	*	-0.741648	6.1691	13.765	0.000207161	Exon (uc007sll.1/435391, exon 3 of 4)	chr14	21676572	21714576	38005	-	435391	uc007sll.1	29950	ENSMUSG00000063821	Dupd1	dual specificity phosphatase and pro isomerase domain containing 1
chr7	137320351	137322350	2000	*	-0.80055	6.82867	18.9133	1.36797e-05	Distal Intergenic	chr7	137193671	137314445	120775	-	13593	uc009ker.2	-7905	ENSMUSG00000010476	Ebf3	early B cell factor 3
chr4	91372168	91374167	2000	*	-0.802236	6.12653	21.42	3.68912e-06	Intron (uc008top.3/15569, intron 6 of 6)	chr4	91250767	91372055	121289	-	15569	uc008ton.2	-2112	ENSMUSG00000008489	Elavl2	ELAV (embryonic lethal, abnormal vision, Drosophila)-like 2 (Hu antigen B)
chr4	91372648	91374647	2000	*	-0.779325	6.40292	17.5755	2.76124e-05	Intron (uc008top.3/15569, intron 6 of 6)	chr4	91250767	91372055	121289	-	15569	uc008ton.2	-2592	ENSMUSG00000008489	Elavl2	ELAV (embryonic lethal, abnormal vision, Drosophila)-like 2 (Hu antigen B)
chr16	36826053	36828052	2000	*	1.4885	4.19297	12.8824	0.000331681	Exon (uc007zcx.1/106389, exon 1 of 6)	chr16	36792884	36828259	35376	-	106389	uc007zcx.1	2206	ENSMUSG00000022838	Eaf2	ELL associated factor 2
chr7	44494215	44496214	2000	*	-0.590489	6.24003	12.7483	0.000356334	Exon (uc009gpq.2/69683, exon 2 of 8)	chr7	44489938	44496513	6576	-	69683	uc009gpq.2	2298	ENSMUSG00000008140	Emc10	ER membrane protein complex subunit 10
chr6	30205933	30207932	2000	*	1.59447	4.35759	16.0796	6.0734e-05	Distal Intergenic	chr6	30176623	30178040	1418	+	100463519	uc029vtv.1	31309		BB283400	expressed sequence BB283400
chr4	129224459	129226458	2000	*	-0.766511	7.00009	14.9412	0.000110913	5' UTR	chr4	129219578	129227889	8312	-	97130	uc008uwl.1	3430	ENSMUSG00000050390	C77080	expressed sequence C77080
chr3	109027816	109029815	2000	*	1.46484	4.40574	12.413	0.000426363	Distal Intergenic	chr3	108970997	109027607	56611	-	329739	uc008rac.2	-2208	ENSMUSG00000040339	Fam102b	family with sequence similarity 102, member B
chr8	45042283	45044282	2000	*	-0.727042	7.55909	12.4737	0.000412716	Promoter	chr8	45043923	45052257	8335	+	14107	uc009loo.1	0	ENSMUSG00000070047	Fat1	FAT tumor suppressor homolog 1 (Drosophila)	ortholog of the Drosophila fat gene, which encodes a tumor suppressor essential for controlling cell proliferation during Drosophila development / cell communication
chr8	45025905	45027904	2000	*	-0.666638	7.63491	11.6419	0.000644842	Exon (uc009lon.2/14107, exon 9 of 26)	chr8	45033339	45052257	18919	+	14107	uc009lom.1	-7434	ENSMUSG00000070047	Fat1	FAT tumor suppressor homolog 1 (Drosophila)
chr1	170906620	170908619	2000	*	1.4748	4.25186	13.8262	0.000200518	Exon (uc007dmp.1/435653, exon 5 of 6)	chr1	170907273	170912941	5669	-	435653	uc007dmp.1	6321	ENSMUSG00000070524	Fcrlb	Fc receptor-like B	Fc receptor-like B / Nothing specific / Autophagy / hypersensitivity
chr17	56256230	56258229	2000	*	-0.780493	6.48918	12.2748	0.000459125	Promoter	chr17	56256793	56263608	6816	+	14154	uc008dbk.2	0	ENSMUSG00000043683	Fem1a	feminization 1 homolog a (C. elegans)
chr19	5445473	5447472	2000	*	1.7054	3.9336	11.854	0.000575372	Distal Intergenic	chr19	5447698	5455938	8241	+	14283	uc008gdc.1	-2225	ENSMUSG00000024912	Fosl1	fos-like antigen 1
chr5	32131004	32133003	2000	*	-0.478436	6.56089	11.9565	0.000544557	Distal Intergenic	chr5	32136472	32157839	21368	+	14284	uc008wzi.2	-5468	ENSMUSG00000029135	Fosl2	fos-like antigen 2
chr11	102606499	102608498	2000	*	-0.523794	6.84619	16.6704	4.44703e-05	3' UTR	chr11	102604431	102608058	3628	+	57265	uc011yft.1	4067	ENSMUSG00000050288	Fzd2	frizzled homolog 2 (Drosophila)
chr6	134867873	134869872	2000	*	-0.614699	7.22178	11.8574	0.000574326	3' UTR	chr6	134869093	134887859	18767	-	14760	uc009ekv.2	19986	ENSMUSG00000032641	Gpr19	G protein-coupled receptor 19
chr6	99693457	99695456	2000	*	0.954882	5.15233	13.2998	0.000265435	Exon (uc009dbs.1/14761, exon 1 of 1)	chr6	99692679	99693818	1140	+	14761	uc009dbs.1	2777	ENSMUSG00000072875	Gpr27	G protein-coupled receptor 27
chr12	91648083	91650082	2000	*	-0.824253	7.87659	12.107	0.000502341	Exon (uc007okt.2/108800, exon 5 of 7)	chr12	91555262	91590487	35226	-	83602	uc007oks.2	-59595	ENSMUSG00000020962	Gtf2a1	general transcription factor II A, 1
chr17	30899533	30901532	2000	*	1.29191	4.44707	12.1976	0.000478517	Distal Intergenic	chr17	30901867	30936510	34644	+	14652	uc008bud.1	-2334	ENSMUSG00000024027	Glp1r	glucagon-like peptide 1 receptor
chr4	125504515	125506514	2000	*	-0.934543	6.28043	16.1281	5.91995e-05	3' UTR	chr4	125490831	125714173	223343	+	14807	uc008usa.2	15683	ENSMUSG00000001985	Grik3	glutamate receptor, ionotropic, kainate 3
chr11	70518034	70520033	2000	*	-0.595956	6.46004	12.4488	0.00041826	Promoter	chr11	70519209	70520736	1528	+	216871	uc007jvd.1	0	ENSMUSG00000046811	Gltpd2	glycolipid transfer protein domain containing 2
chr3	75947015	75949014	2000	*	-0.749138	6.48895	13.3462	0.000258945	Intron (uc008pnf.1/73124, intron 14 of 14)	chr3	75876384	75956831	80448	-	73124	uc008pnf.1	9816	ENSMUSG00000034109	Golim4	golgi integral membrane protein 4
chr3	75957135	75959134	2000	*	1.90701	4.36494	18.8587	1.40766e-05	Distal Intergenic	chr3	75876384	75956831	80448	-	73124	uc008pnf.1	-2303	ENSMUSG00000034109	Golim4	golgi integral membrane protein 4
chr8	84832719	84834718	2000	*	-2.03567	3.80365	13.2329	0.000275082	3' UTR	chr8	84832282	84835482	3201	+	102060	uc009mnj.1	2436	ENSMUSG00000033751	Gadd45gip1	growth arrest and DNA-damage-inducible, gamma interacting protein 1
chr17	34975522	34977521	2000	*	-0.752327	6.91392	11.9184	0.00055582	5' UTR	chr17	34972703	34979228	6526	+	15482	uc008ceq.1	4818	ENSMUSG00000007033	Hspa1l	heat shock protein 1-like
chr11	63923671	63925670	2000	*	-0.744976	7.47264	13.196	0.000280546	Distal Intergenic	chr11	63884693	63922284	37592	-	54710	uc007jkn.1	-3386	ENSMUSG00000070407	Hs3st3b1	heparan sulfate (glucosamine) 3-O-sulfotransferase 3B1
chr7	81934755	81936754	2000	*	-0.655413	6.85659	11.9382	0.000549947	Distal Intergenic	chr7	81881256	81934459	53204	-	29877	uc009icr.1	-2295	ENSMUSG00000025104	Hdgfrp3	hepatoma-derived growth factor, related protein 3
chr8	74994387	74996386	2000	*	1.33219	4.94833	16.0164	6.27976e-05	Intron (uc009mgw.1/70823, intron 1 of 4)	chr8	74993703	75001890	8188	+	70823	uc009mgw.1	2683	ENSMUSG00000034518	Hmgxb4	HMG box domain containing 4
chr15	103059629	103061628	2000	*	-0.801376	7.6192	15.9209	6.60452e-05	Distal Intergenic	chr15	103033967	103036852	2886	+	15423	uc007xxg.1	27661	ENSMUSG00000075394	Hoxc4	homeobox C4
chr7	24534411	24536410	2000	*	-0.539817	6.96179	11.9016	0.000560856	3' UTR	chr7	24531338	24538600	7263	+	210146	uc012ffl.1	5072	ENSMUSG00000041037	Irgq	immunity-related GTPase family, Q
chr19	3280688	3282687	2000	*	1.9293	4.13457	17.7525	2.51583e-05	5' UTR	chr19	3259076	3283010	23935	-	20589	uc008fwa.1	2322	ENSMUSG00000024831	Ighmbp2	immunoglobulin mu binding protein 2
chr7	126859764	126861763	2000	*	-0.65966	5.86989	12.2354	0.000468906	Promoter	chr7	126852433	126861463	9031	-	233875	uc009jtc.1	0	ENSMUSG00000030689	Ino80e	INO80 complex subunit E
chr7	128609383	128611382	2000	*	-0.726174	7.38284	13.2796	0.000268306	Promoter	chr7	128611365	128696436	85072	+	101490	uc009jzc.1	0	ENSMUSG00000042105	Inpp5f	inositol polyphosphate-5-phosphatase F
chr4	88777527	88779526	2000	*	-0.77068	6.78829	15.9446	6.52225e-05	5' UTR	chr4	88782131	88783592	1462	+	319146	uc008tnp.1	-4604	ENSMUSG00000096854	Ifnz	interferon zeta
chr1	185326864	185328863	2000	*	1.64172	4.26533	16.0632	6.12638e-05	Exon (uc007dyz.1/381314, exon 2 of 23)	chr1	185286662	185329401	42740	-	381314	uc007dyz.1	2537	ENSMUSG00000026618	Iars2	isoleucine-tRNA synthetase 2, mitochondrial
chr16	35981175	35983174	2000	*	-0.511476	8.07223	18.044	2.15853e-05	Exon (uc007zbz.1/uc007zbz.1, exon 1 of 4)	chr16	35983363	36005188	21826	+	16646	uc007zca.1	-2188	ENSMUSG00000022905	Kpna1	karyopherin (importin) alpha 1
chr12	112159612	112161611	2000	*	-0.633716	7.11657	12.462	0.000415317	Intron (uc007pem.1/668303, intron 3 of 15)	chr12	112146208	112181747	35540	+	668303	uc007pem.1	15403	ENSMUSG00000021294	Kif26a	kinesin family member 26A
chr12	111772394	111774393	2000	*	-0.798597	7.5029	12.1887	0.000480799	Exon (uc007pdv.1/16593, exon 2 of 14)	chr12	111758849	111794899	36051	+	16593	uc007pdv.1	15544	ENSMUSG00000021288	Klc1	kinesin light chain 1
chr10	125964086	125966085	2000	*	-0.771892	6.57042	12.2153	0.000473981	Distal Intergenic	chr10	125966219	125998013	31795	+	320398	uc007hhb.2	-2133	ENSMUSG00000020105	Lrig3	leucine-rich repeats and immunoglobulin-like domains 3
chr15	99873243	99875242	2000	*	1.34641	4.51148	12.0247	0.000525013	Intron (uc007xqi.2/65970, intron 10 of 10)	chr15	99778468	99875456	96989	-	65970	uc007xqi.2	2213	ENSMUSG00000023022	Lima1	LIM domain and actin binding 1
chr5	29378523	29380522	2000	*	-0.695072	6.19553	17.1782	3.40316e-05	Distal Intergenic	chr5	29229802	29378390	148589	-	56873	uc008wug.1	-2132	ENSMUSG00000010721	Lmbr1	limb region 1
chr8	84703337	84705336	2000	*	-0.787895	7.39878	12.3597	0.000438691	3' UTR	chr8	84701457	84704716	3260	+	17095	uc009mnb.1	3879	ENSMUSG00000034041	Lyl1	lymphoblastomic leukemia 1
chr2	60383382	60385381	2000	*	2.01882	3.83961	13.622	0.000223552	Distal Intergenic	chr2	60293760	60383231	89472	-	17076	uc008jud.1	-2150	ENSMUSG00000026980	Ly75	lymphocyte antigen 75
chr2	152687231	152689230	2000	*	-0.752767	6.48652	13.1503	0.000287475	5' UTR	chr2	152687148	152687942	795	+	66405	uc008nge.1	2082	ENSMUSG00000042814	Mcts2	malignant T cell amplified sequence 2
chr7	16156752	16158751	2000	*	-0.799591	6.41087	13.1337	0.000290026	Exon (uc009fgz.1/110891, exon 9 of 10)	chr7	16175380	16186503	11124	+	17537	uc009fha.1	-18628	ENSMUSG00000041420	Meis3	Meis homeobox 3
chr7	132852665	132854664	2000	*	1.18418	4.62662	12.4919	0.000408726	Distal Intergenic	chr7	132827461	132852647	25187	-	72096	uc009kcm.1	-2017	ENSMUSG00000030960	Mettl10	methyltransferase like 10
chr6	47740698	47742697	2000	*	-0.571304	9.33966	12.2567	0.000463592	Intron (uc009bte.1/uc009bte.1, intron 8 of 9)	chr6	47803576	47803652	77	-	735289	uc012elb.1	62954		Mir704	microRNA 704
chr11	115610387	115612386	2000	*	1.19395	4.80848	14.0689	0.000176232	5' UTR	chr11	115607919	115612503	4585	-	69674	uc007mib.1	2116	ENSMUSG00000020743	Mif4gd	MIF4G domain containing
chr11	88204604	88206603	2000	*	-0.753943	5.89346	13.6796	0.000216795	5' UTR	chr11	88204428	88211507	7080	+	64656	uc007kvj.1	2175	ENSMUSG00000023723	Mrps23	mitochondrial ribosomal protein S23
chr4	23517116	23519115	2000	*	-0.825204	7.41613	12.2319	0.00046979	Distal Intergenic	chr4	24496462	24503408	6947	+	212377	uc008sdu.2	-979346	ENSMUSG00000045751	Mms22l	MMS22-like, DNA repair protein
chr10	81497184	81499183	2000	*	-0.713607	7.37536	11.9039	0.000560174	3' UTR	chr10	81486459	81496363	9905	-	103425	uc007gig.1	-2820	ENSMUSG00000020238	Ncln	nicalin homolog (zebrafish)
chr5	101657014	101659013	2000	*	1.91339	3.89949	14.6412	0.000130039	Downstream (<1kb)	chr5	101659197	101664711	5515	-	18096	uc008yim.1	7697	ENSMUSG00000035187	Nkx6-1	NK6 homeobox 1
chr13	97135670	97137669	2000	*	-0.670386	6.65521	15.7566	7.20346e-05	Exon (uc007rns.2/59050, exon 2 of 6)	chr13	97129427	97137926	8500	-	59050	uc007rns.2	2256	ENSMUSG00000060739	Nsa2	NSA2 ribosome biogenesis homolog (S. cerevisiae)
chr7	132576496	132578495	2000	*	1.52912	4.08411	12.6438	0.000376823	Distal Intergenic	chr7	132557475	132576398	18924	-	18242	uc009kcb.1	-2097	ENSMUSG00000030934	Oat	ornithine aminotransferase
chr7	141414204	141416203	2000	*	1.79228	4.05814	12.8464	0.000338126	Distal Intergenic	chr7	141408184	141414125	5942	-	213350	uc012fwy.1	-2078	ENSMUSG00000051007	Pddc1	Parkinson disease 7 domain containing 1
chr15	66578127	66580126	2000	*	0.992308	4.91974	12.7645	0.000353255	Promoter	chr15	66580073	66624099	44027	+	239510	uc007wak.1	0	ENSMUSG00000072501	Phf20l1	PHD finger protein 20-like 1
chr11	69997528	69999527	2000	*	-0.596725	7.31491	12.2231	0.000472008	5' UTR	chr11	69997462	70000011	2550	+	78246	uc007jtk.2	2065	ENSMUSG00000018572	Phf23	PHD finger protein 23
chr16	31934043	31936042	2000	*	-0.681379	6.84044	13.8268	0.000200458	5' UTR	chr16	31933851	31942622	8772	+	239827	uc007yxw.2	2191	ENSMUSG00000045625	Pigz	phosphatidylinositol glycan anchor biosynthesis, class Z
chr12	59067475	59069474	2000	*	-0.626277	6.6115	12.0643	0.000513967	3' UTR	chr12	59066919	59071536	4618	+	18949	uc007nqa.1	2555	ENSMUSG00000020994	Pnn	pinin
chr5	128734037	128736036	2000	*	-0.804075	6.45562	19.5966	9.56397e-06	Distal Intergenic	chr5	128736246	128755474	19229	+	57749	uc008zsi.1	-2209	ENSMUSG00000029423	Piwil1	piwi-like RNA-mediated gene silencing 1
chr17	46245857	46247856	2000	*	-0.799622	5.64866	11.9989	0.000532315	Exon (uc008csc.1/20016, exon 2 of 9)	chr17	46243920	46248045	4126	-	20016	uc008csc.1	2188	ENSMUSG00000067148	Polr1c	polymerase (RNA) I polypeptide C
chr9	71483410	71485409	2000	*	1.32856	4.56864	14.3751	0.000149771	Promoter	chr9	71478437	71484958	6522	-	28015	uc009qoy.2	0	ENSMUSG00000032199	Polr2m	polymerase (RNA) II (DNA directed) polypeptide M
chr13	66007844	66009843	2000	*	-0.524165	6.53217	13.3219	0.00026233	Distal Intergenic	chr13	66113453	66122836	9384	+	628709	uc011zbc.1	-105609	ENSMUSG00000095909	Gm10324	predicted gene 10324
chr4	88776910	88778909	2000	*	-0.705438	6.93709	11.7891	0.000595774	5' UTR	chr4	88773834	88774801	968	+	545646	uc029uwu.1	5075	ENSMUSG00000094271	Gm13290	predicted gene 13290
chr4	42231060	42233059	2000	*	-0.832531	7.73986	13.0459	0.000303952	5' UTR	chr4	42255695	42256825	1131	+	100504346	uc029usp.1	-24635	ENSMUSG00000073878	Gm13304	predicted gene 13304
chr17	15024426	15026425	2000	*	1.4593	4.29514	12.9671	0.000317016	Intron (uc029taj.1/100041621, intron 14 of 14)	chr17	15010279	15020780	10502	+	100041621	uc008anw.1	16146	ENSMUSG00000079709	Gm3435	predicted gene 3435
chr17	15024915	15026914	2000	*	1.35853	4.44966	12.8677	0.000334296	Intron (uc029taj.1/100041621, intron 14 of 14)	chr17	15027151	15041433	14283	-	100041639	uc008aoa.3	16518	ENSMUSG00000079710	Gm3448	predicted gene 3448
chr4	41881819	41883818	2000	*	-0.912758	7.71927	13.7664	0.000207007	5' UTR	chr4	41889795	42233950	344156	+	100042539	uc029uri.1	-7976		Gm3893	predicted gene 3893
chr17	45628236	45630235	2000	*	1.629	4.176	13.5445	0.000232972	3' UTR	chr17	45600967	45602102	1136	-	653016	uc012aug.1	-28133	ENSMUSG00000079471	Gm7325	predicted gene 7325
chr8	20555689	20557688	2000	*	-0.500289	6.33448	11.7136	0.000620461	Distal Intergenic	chr8	20614927	20640703	25777	+	100861668	uc029wrm.1	-59238	ENSMUSG00000095294	Gm21119	predicted gene, 21119
chr4	147934465	147936464	2000	*	1.31705	4.42212	13.1885	0.000281677	Intron (uc008vtk.2/18822, intron 18 of 18)	chr4	147909753	147936776	27024	-	18822	uc008vtk.2	2311	ENSMUSG00000019055	Plod1	procollagen-lysine, 2-oxoglutarate 5-dioxygenase 1
chr10	128566453	128568452	2000	*	1.44764	4.32121	11.7119	0.000621026	Downstream (<1kb)	chr10	128557766	128565934	8169	-	18813	uc007hnl.1	-2518	ENSMUSG00000025364	Pa2g4	proliferation-associated 2G4
chr17	34185674	34187673	2000	*	-0.743753	6.00882	11.6523	0.000641239	Promoter	chr17	34182099	34187330	5232	-	16912	uc008cbs.1	0	ENSMUSG00000096727	Psmb9	proteasome (prosome, macropain) subunit, beta type 9 (large multifunctional peptidase 2)
chr2	163658847	163660846	2000	*	-0.793128	6.23793	11.8877	0.000565053	5' UTR	chr2	163658458	163726158	67701	+	18769	uc012ciw.1	2388	ENSMUSG00000035268	Pkig	protein kinase inhibitor, gamma
chr12	76417900	76419899	2000	*	0.945071	5.11962	12.4013	0.000429043	Exon (uc011yob.1/210762, exon 2 of 11)	chr12	76417599	76439491	21893	+	210762	uc011yob.1	2300	ENSMUSG00000052221	Ppp1r36	protein phosphatase 1, regulatory subunit 36
chr10	79882290	79884289	2000	*	-0.95263	5.93522	21.3525	3.82129e-06	3' UTR	chr10	79880980	79883172	2193	+	19152	uc011xie.1	3309	ENSMUSG00000057729	Prtn3	proteinase 3
chr18	36978150	36980149	2000	*	-0.618693	6.41486	11.9533	0.000545498	Intron (uc008eot.2/116731, intron 1 of 3)	chr18	36973924	37187660	213737	+	12939	uc008epc.2	6225		Pcdha7	protocadherin alpha 7
chr18	37307101	37309100	2000	*	-0.621083	6.56667	11.7022	0.000624265	Promoter	chr18	37307455	37311173	3719	+	93875	uc008epp.1	0	ENSMUSG00000045689	Pcdhb4	protocadherin beta 4
chr18	37751254	37753253	2000	*	-0.655065	7.61539	13.8679	0.000196117	Promoter	chr18	37751779	37841872	90094	+	93704	uc008era.1	0		Pcdhgb7	protocadherin gamma subfamily B, 7
chr11	95041508	95043507	2000	*	2.03898	3.72866	11.6478	0.000642773	Downstream (<1kb)	chr11	95026258	95041371	15114	-	18604	uc007kzu.2	-2136	ENSMUSG00000038967	Pdk2	pyruvate dehydrogenase kinase, isoenzyme 2
chr15	89589374	89591373	2000	*	-0.994003	6.85316	19.3731	1.0751e-05	Promoter	chr15	89582527	89590426	7900	-	68708	uc007xhe.1	0	ENSMUSG00000022621	Rabl2	RAB, member of RAS oncogene family-like 2
chr2	84884314	84886313	2000	*	1.219	4.42064	11.6273	0.000649922	Intron (uc008kjm.1/269295, intron 2 of 2)	chr2	84871946	84886692	14747	-	269295	uc008kjm.1	2378	ENSMUSG00000050896	Rtn4rl2	reticulon 4 receptor-like 2
chr2	91650422	91652421	2000	*	1.28706	4.88846	15.203	9.65492e-05	5' UTR	chr2	91650118	91672320	22203	+	228359	uc008kwi.2	2303	ENSMUSG00000027247	Arhgap1	Rho GTPase activating protein 1
chr8	14960536	14962535	2000	*	-0.638353	7.36512	16.2192	5.64196e-05	Exon (uc009kzf.1/234094, exon 16 of 16)	chr8	14929957	14932420	2464	+	234094	uc009kzi.1	32578	ENSMUSG00000071176	Arhgef10	Rho guanine nucleotide exchange factor (GEF) 10
chr5	135632972	135634971	2000	*	1.73102	4.03574	13.1832	0.000282469	Intron (uc008zyp.1/215160, intron 1 of 3)	chr5	135632654	135636402	3749	+	215160	uc008zyp.1	2317	ENSMUSG00000039917	Rhbdd2	rhomboid domain containing 2
chr7	141168748	141170747	2000	*	-2.77039	3.6496	16.2135	5.65905e-05	Promoter	chr7	141160326	141168936	8611	-	107702	uc009kjs.2	0	ENSMUSG00000038650	Rnh1	ribonuclease/angiogenin inhibitor 1
chr4	101069749	101071748	2000	*	1.59883	4.31975	13.1923	0.0002811	Intron (uc008tvi.1/242570, intron 1 of 7)	chr4	101069038	101135356	66319	+	242570	uc008tvi.1	2710	ENSMUSG00000035275	Raver2	ribonucleoprotein, PTB-binding 2
chr19	23619906	23621905	2000	*	-0.701859	6.5105	12.1672	0.000486371	Intron (uc008had.1/67483, intron 5 of 5)	chr19	23558760	23652812	94053	-	67483	uc008had.1	32906	ENSMUSG00000033053	1700028P14Rik	RIKEN cDNA 1700028P14 gene
chr11	115766061	115768060	2000	*	-0.754826	7.29372	13.1784	0.000283191	Intron (uc007mil.1/71947, intron 1 of 31)	chr11	115765442	115795425	29984	+	71947	uc007mim.1	2618	ENSMUSG00000020747	2310067B10Rik	RIKEN cDNA 2310067B10 gene
chr19	18668718	18670717	2000	*	-0.749656	5.95686	12.5322	0.000400004	Distal Intergenic	chr19	18670780	18704792	34013	+	67383	uc008gxv.1	-2062	ENSMUSG00000024726	2410127L17Rik	RIKEN cDNA 2410127L17 gene
chr19	28973070	28975069	2000	*	-0.504587	6.3983	11.7877	0.000596236	Distal Intergenic	chr19	28901268	28967730	66463	-	381218	uc008hcp.1	-7339	ENSMUSG00000064202	4430402I18Rik	RIKEN cDNA 4430402I18 gene
chr13	54565452	54567451	2000	*	1.32159	4.36319	12.6164	0.000382377	Distal Intergenic	chr13	54551192	54565382	14191	-	97820	uc007qog.2	-2069	ENSMUSG00000025871	4833439L19Rik	RIKEN cDNA 4833439L19 gene
chr6	50607572	50609571	2000	*	-0.862058	7.9494	12.5175	0.000403155	Distal Intergenic	chr6	50573304	50596590	23287	-	70821	uc009bxf.1	-12981	ENSMUSG00000029828	4921507P07Rik	RIKEN cDNA 4921507P07 gene
chr6	50618686	50620685	2000	*	-0.755366	6.534	11.7414	0.000611259	Distal Intergenic	chr6	50573304	50596590	23287	-	70821	uc009bxf.1	-24095	ENSMUSG00000029828	4921507P07Rik	RIKEN cDNA 4921507P07 gene
chr6	50609837	50611836	2000	*	-0.632999	7.17281	11.8748	0.000568979	Distal Intergenic	chr6	50573304	50596590	23287	-	70821	uc009bxf.1	-15246	ENSMUSG00000029828	4921507P07Rik	RIKEN cDNA 4921507P07 gene
chr6	50566889	50568888	2000	*	1.29543	4.51889	11.9111	0.000558003	Exon (uc009bxd.1/73183, exon 1 of 4)	chr6	50566643	50594865	28223	+	73183	uc009bxd.1	2245	ENSMUSG00000085776	5430402O13Rik	RIKEN cDNA 5430402O13 gene
chr6	52314804	52316803	2000	*	-1.44734	4.39658	12.3687	0.000436586	Promoter	chr6	52308389	52314832	6444	-	70593	uc009byu.1	0	ENSMUSG00000086126	5730457N03Rik	RIKEN cDNA 5730457N03 gene
chr7	139978806	139980805	2000	*	1.84891	4.49964	24.8107	6.32458e-07	3' UTR	chr7	139972303	139978755	6453	-	381933	uc009kgi.1	-2050	ENSMUSG00000073795	6430531B16Rik	RIKEN cDNA 6430531B16 gene
chr19	12596344	12598343	2000	*	1.93832	3.91417	12.6717	0.000371223	Promoter	chr19	12585868	12596566	10699	-	74333	uc012bjb.1	0	ENSMUSG00000086213	A330040F15Rik	RIKEN cDNA A330040F15 gene
chrX	139358595	139360594	2000	*	-0.70884	5.96906	12.0962	0.000505246	Distal Intergenic	chrX	139347491	139357738	10248	-	78526	uc009ukf.2	-2856	ENSMUSG00000086807	C330013F16Rik	RIKEN cDNA C330013F16 gene
chr11	82868805	82870804	2000	*	1.72901	3.94536	12.0308	0.0005233	Promoter	chr11	82803819	82870744	66926	-	67338	uc007kni.2	0	ENSMUSG00000020696	Rffl	ring finger and FYVE like domain containing protein	A.K.A Carp2 - involved in uniquitination pathways / E3 ligase / involved p53 degradation
chr18	77441727	77443726	2000	*	-0.848546	6.53936	14.7772	0.000120987	3' UTR	chr18	77456110	77565136	109027	-	225743	uc008frj.2	123409	ENSMUSG00000025427	Rnf165	ring finger protein 165
chr7	127589146	127591145	2000	*	-0.589413	6.66667	16.7727	4.21341e-05	Exon (uc009jwe.2/233900, exon 3 of 20)	chr7	127588698	127603605	14908	+	233900	uc009jwe.2	2447	ENSMUSG00000030816	Rnf40	ring finger protein 40
chr16	92603601	92605600	2000	*	-0.576576	6.77887	17.1206	3.50796e-05	3' UTR	chr16	92686989	92697325	10337	-	12394	uc007zzl.1	93724	ENSMUSG00000022952	Runx1	runt related transcription factor 1
chr11	67052951	67054950	2000	*	1.86858	3.91752	13.3729	0.000255293	Exon (uc007jlu.1/52892, exon 2 of 6)	chr11	67052670	67067440	14771	+	52892	uc007jlu.1	2280	ENSMUSG00000069844	Sco1	SCO cytochrome oxidase deficient homolog 1 (yeast)
chr6	113757005	113759004	2000	*	-0.792861	6.5868	15.73	7.30554e-05	Exon (uc009dhn.1/11941, exon 18 of 20)	chr6	113728052	113740681	12630	-	110379	uc009dhm.1	-18323	ENSMUSG00000030298	Sec13	SEC13 homolog (S. cerevisiae)
chr6	113755488	113757487	2000	*	-0.716865	6.64678	12.9108	0.000326685	Exon (uc009dhn.1/11941, exon 19 of 20)	chr6	113728052	113740681	12630	-	110379	uc009dhm.1	-16806	ENSMUSG00000030298	Sec13	SEC13 homolog (S. cerevisiae)
chr4	134549933	134551932	2000	*	-0.686287	7.09194	13.7605	0.00020766	Exon (uc008vfk.1/74777, exon 2 of 12)	chr4	134537892	134552166	14275	-	74777	uc008vfk.1	2233	ENSMUSG00000050989	Sepn1	selenoprotein N, 1
chr15	89548481	89550480	2000	*	-0.891445	5.60837	17.7107	2.57182e-05	Exon (uc007xha.2/58234, exon 21 of 22)	chr15	89532958	89543230	10273	+	58234	uc029suq.1	17522	ENSMUSG00000022623	Shank3	SH3/ankyrin domain gene 3
chr5	34549798	34551797	2000	*	1.74366	3.83439	11.932	0.00055179	5' UTR	chr5	34549576	34563639	14064	+	24055	uc008xco.2	2221	ENSMUSG00000054520	Sh3bp2	SH3-domain binding protein 2
chr5	92895736	92897735	2000	*	-0.830421	5.72096	13.6664	0.000218323	Intron (uc008ydt.1/27428, intron 2 of 10)	chr5	92897998	92965759	67762	+	27428	uc008ydv.1	-2262	ENSMUSG00000029381	Shroom3	shroom family member 3
chr4	41738725	41740724	2000	*	-0.649399	6.02949	11.7047	0.000623415	3' UTR	chr4	41738496	41741313	2818	-	18391	uc008sjk.1	2588	ENSMUSG00000036078	Sigmar1	sigma non-opioid intracellular receptor 1
chr12	73032964	73034963	2000	*	1.84602	4.21227	13.2038	0.000279379	Distal Intergenic	chr12	73041827	73046712	4886	-	20471	uc007nwa.2	13748	ENSMUSG00000051367	Six1	sine oculis-related homeobox 1
chr17	85683054	85685053	2000	*	-0.673805	6.91446	15.7815	7.10959e-05	3' UTR	chr17	85684268	85688254	3987	-	20472	uc008duc.2	5200	ENSMUSG00000024134	Six2	sine oculis-related homeobox 2
chr18	73704326	73706325	2000	*	1.50213	4.26692	13.213	0.000278015	Distal Intergenic	chr18	73639013	73703741	64729	-	17128	uc008fov.1	-2584	ENSMUSG00000024515	Smad4	SMAD family member 4
chr2	130274816	130276815	2000	*	-0.783305	6.7363	14.0974	0.000173581	Promoter	chr2	130275515	130275573	59	+	100217452	uc012cea.1	0		Snord110	small nucleolar RNA, C/D box 110
chr11	69945926	69947925	2000	*	1.08676	5.14197	12.2352	0.00046896	5' UTR	chr11	69942286	69948134	5849	-	20528	uc007jsy.1	2208	ENSMUSG00000018566	Slc2a4	solute carrier family 2 (facilitated glucose transporter), member 4
chr2	27025818	27027817	2000	*	1.00703	5.04758	14.4241	0.000145921	Exon (uc008iwv.1/227659, exon 1 of 10)	chr2	27021365	27027998	6634	-	227659	uc008iwv.1	2180	ENSMUSG00000036067	Slc2a6	solute carrier family 2 (facilitated glucose transporter), member 6
chr18	61209257	61211256	2000	*	1.48094	4.31376	14.1063	0.000172761	Intron (uc008fbu.1/13521, intron 3 of 3)	chr18	61196854	61211596	14743	-	13521	uc008fbu.1	2339	ENSMUSG00000034320	Slc26a2	solute carrier family 26 (sulfate transporter), member 2
chr5	120509087	120511086	2000	*	-0.767528	6.83929	13.7106	0.000213245	Distal Intergenic	chr5	120511192	120534024	22833	+	170756	uc008zhj.2	-2105	ENSMUSG00000032754	Slc8b1	solute carrier family 8 (sodium/lithium/calcium exchanger), member B1
chr13	57908452	57910451	2000	*	-0.859757	5.81482	17.5551	2.79094e-05	Distal Intergenic	chr13	57421195	57908332	487138	-	20745	uc007qtc.2	-2119	ENSMUSG00000056222	Spock1	sparc/osteonectin, cwcv and kazal-like domains proteoglycan 1
chr2	156065914	156067913	2000	*	0.78609	5.51895	13.2242	0.000276359	5' UTR	chr2	156065213	156069499	4287	+	245865	uc008nmd.1	2700	ENSMUSG00000038180	Spag4	sperm associated antigen 4
chr8	47193549	47195548	2000	*	-0.772803	7.00023	11.89	0.000564355	5' UTR	chr8	47191616	47220193	28578	-	71069	uc009lqz.2	26644	ENSMUSG00000038143	Stox2	storkhead box 2
chr11	87737002	87739001	2000	*	-1.02288	6.04827	12.445	0.000419102	Promoter	chr11	87737565	87743617	6053	+	20922	uc007kuj.1	0	ENSMUSG00000020485	Supt4a	suppressor of Ty 4A
chr1	93233702	93235701	2000	*	1.39353	4.68129	16.179	5.76289e-05	Distal Intergenic	chr1	93235897	93296448	60552	+	208777	uc007cdm.1	-2195	ENSMUSG00000047793	Sned1	sushi, nidogen and EGF-like domains 1
chr2	178405226	178407225	2000	*	-0.913064	5.97873	14.4201	0.000146235	Intron (uc008ohn.1/320558, intron 43 of 43)	chr2	178345296	178407658	62363	-	320558	uc008ohn.1	2432	ENSMUSG00000060445	Sycp2	synaptonemal complex protein 2
chr2	154405701	154407700	2000	*	1.58252	4.14329	11.7153	0.000619871	Exon (uc008nje.2/20648, exon 1 of 8)	chr2	154376314	154408084	31771	-	20648	uc008nje.2	2383	ENSMUSG00000027488	Snta1	syntrophin, acidic 1
chrX	106219885	106221884	2000	*	-0.774144	7.13662	12.7157	0.000362608	Promoter	chrX	106206874	106221158	14285	-	407786	uc009ubp.2	0	ENSMUSG00000047242	Taf9b	TAF9B RNA polymerase II, TATA box binding protein (TBP)-associated factor
chr9	90270609	90272608	2000	*	-0.847791	6.02352	12.8722	0.000333507	Promoter	chr9	90202049	90270769	68721	-	67016	uc009rac.1	0	ENSMUSG00000037410	Tbc1d2b	TBC1 domain family, member 2B
chr19	38834499	38836498	2000	*	2.16515	3.97163	13.2877	0.000267152	Distal Intergenic	chr19	38836579	38919923	83345	+	209478	uc008hjs.1	-2080	ENSMUSG00000048720	Tbc1d12	TBC1D12: TBC1 domain family, member 12
chr4	128630485	128632484	2000	*	-0.698313	5.79682	12.0885	0.00050735	Distal Intergenic	chr4	128615446	128618619	3174	-	384059	uc008uvf.1	-13865	ENSMUSG00000062545	Tlr12	toll-like receptor 12
chr19	14594914	14596913	2000	*	1.50192	4.08687	11.8839	0.000566206	Exon (uc008gwk.1/21888, exon 2 of 20)	chr19	14448072	14597983	149912	-	21888	uc008gwk.1	3069	ENSMUSG00000024642	Tle4	transducin-like enhancer of split 4, homolog of Drosophila E(spl)
chr8	125013846	125015845	2000	*	-0.739507	6.75177	13.1654	0.000285171	Exon (uc009nxz.1/53424, exon 3 of 5)	chr8	125012997	125030421	17425	+	53424	uc009nxz.1	2848	ENSMUSG00000056820	Tsnax	translin-associated factor X
chr12	71134306	71136305	2000	*	2.04747	3.90053	14.5565	0.000136015	3' UTR	chr12	71123172	71136675	13504	-	30056	uc007nuh.1	2369	ENSMUSG00000021079	Timm9	translocase of inner mitochondrial membrane 9
chr13	98589307	98591306	2000	*	1.54302	4.10659	12.4517	0.000417607	Distal Intergenic	chr13	98634978	98637410	2433	-	68344	uc011zdk.1	48103	ENSMUSG00000046082	Tmem174	transmembrane protein 174
chr3	8463059	8465058	2000	*	-1.14095	5.53572	16.4638	4.95869e-05	Promoter	chr3	8461387	8463098	1712	-	620966	uc012cnd.1	0		Gm6194	transmembrane protein 189 pseudogene
chr1	16663147	16665146	2000	*	-0.735606	5.97506	11.922	0.000554755	Downstream (<1kb)	chr1	16665191	16678275	13085	+	70397	uc007ajx.1	-2044	ENSMUSG00000025940	Tmem70	transmembrane protein 70
chr7	105760141	105762140	2000	*	-0.720312	6.15006	12.5203	0.000402549	Exon (uc009izh.2/233651, exon 10 of 21)	chr7	105744847	105752207	7361	-	12751	uc009izg.1	-9933	ENSMUSG00000030894	Tpp1	tripeptidyl peptidase I
chr10	71282733	71284732	2000	*	-0.87472	5.74785	14.3081	0.000155197	Intron (uc007foo.2/216080, intron 6 of 6)	chr10	71254980	71285262	30283	-	216080	uc007foo.2	2529	ENSMUSG00000019927	Ube2d1	ubiquitin-conjugating enzyme E2D 1
chr9	121669639	121671638	2000	*	2.42816	3.75089	16.29	5.43489e-05	3' UTR	chr9	121642716	121672954	30239	+	22354	uc009sdl.2	28922	ENSMUSG00000032528	Vipr1	vasoactive intestinal peptide receptor 1
chr12	65226021	65228020	2000	*	-0.762069	7.86939	12.6852	0.000368556	3' UTR	chr12	65225517	65228454	2938	+	70948	uc007nrk.1	2503	ENSMUSG00000035560	Wdr20rt	WD repeat domain 20, retrogene
chr4	103111925	103113924	2000	*	-0.729882	5.83122	11.6416	0.000644925	Intron (uc029uyj.1/242584, intron 16 of 16)	chr4	103038065	103114299	76235	-	242584	uc029uyj.1	2374	ENSMUSG00000035126	Wdr78	WD repeat domain 78
chr11	36047651	36049650	2000	*	-0.813361	6.747	15.6075	7.79468e-05	Exon (uc007ilk.1/23964, exon 22 of 29)	chr11	35839178	35980089	140912	-	211652	uc007ili.1	-69561	ENSMUSG00000018849	Wwc1	WW, C2 and coiled-coil domain containing 1
chr7	39586633	39588632	2000	*	-0.666958	6.13211	12.8375	0.000339747	Distal Intergenic	chr7	39517766	39540415	22650	+	70227	uc009glc.1	70866	ENSMUSG00000068959	Zfp619	zinc finger protein 619
chr9	22071502	22073501	2000	*	1.36871	4.60077	15.8852	6.73025e-05	3' UTR	chr9	22055460	22071345	15886	-	319601	uc009onp.1	-2156	ENSMUSG00000038895	Zfp653	zinc finger protein 653
chr8	26974645	26976644	2000	*	1.59282	4.1702	13.943	0.00018844	Distal Intergenic	chr8	26977336	26981462	4127	+	353310	uc012gbp.1	-2691	ENSMUSG00000085795	Zfp703	zinc finger protein 703
chr17	22874644	22876643	2000	*	-0.75122	6.26742	12.9895	0.000313235	Distal Intergenic	chr17	22846697	22867134	20438	-	240041	uc008asc.2	-9509	ENSMUSG00000059142	Zfp945	zinc finger protein 945
chr9	91365982	91367981	2000	*	-0.882435	5.71364	16.7409	4.2847e-05	Distal Intergenic	chr9	91360345	91365799	5455	-	22771	uc009rag.1	-2182	ENSMUSG00000032368	Zic1	zinc finger protein of the cerebellum 1
chr8	122282862	122284861	2000	*	-0.973045	5.36607	13.2929	0.000266417	Intron (uc009nsj.1/22761, intron 1 of 9)	chr8	122282141	122337247	55107	+	22761	uc009nsj.1	2720	ENSMUSG00000049577	Zfpm1	zinc finger protein, multitype 1
chrX	94793981	94795980	2000	*	-0.740128	5.92059	11.6822	0.000631002	3' UTR	chrX	94791285	94798289	7005	-	668171	uc009ttr.1	4308		Zxda	zinc finger, X-linked, duplicated A

## Sheet: Gene exons
seqnames	start	end	width	strand	logFC	logCPM	LR	PValue	refseq_id	ensembl_gene_id	external_gene_id	description	Function
chr18	38250249	38252652	2404	+	0.435293	4.83766	7.61869	0.00577665	NM_024179	ENSMUSG00000024442	0610009O20Rik	RIKEN cDNA 0610009O20 gene [Source:MGI Symbol;Acc:MGI:1914089]
chr11	70235204	70236089	886	+	0.927593	2.59691	8.08725	0.00445777	NM_001177601	ENSMUSG00000020831	0610010K14Rik	RIKEN cDNA 0610010K14 gene [Source:MGI Symbol;Acc:MGI:1915609]
chr11	70235204	70236085	882	+	0.927593	2.59691	8.08725	0.00445777	NM_145758	ENSMUSG00000020831	0610010K14Rik	RIKEN cDNA 0610010K14 gene [Source:MGI Symbol;Acc:MGI:1915609]
chr11	70235204	70235983	780	+	0.944809	2.48996	8.25666	0.00406027	NM_026757	ENSMUSG00000020831	0610010K14Rik	RIKEN cDNA 0610010K14 gene [Source:MGI Symbol;Acc:MGI:1915609]
chr16	95841886	95842301	416	+	0.85334	2.87709	9.84813	0.00170004	NR_040484	ENSMUSG00000086899	1600002D24Rik	RIKEN cDNA 1600002D24 gene [Source:MGI Symbol;Acc:MGI:1917026]
chrX	85249677	85250516	840	+	-0.505014	4.37671	7.55787	0.00597487	NM_028046	ENSMUSG00000035491	1600014K23Rik	RIKEN cDNA 1600014K23 gene [Source:MGI Symbol;Acc:MGI:1919246]
chr4	34711332	34713047	1716	+	-0.419145	5.73138	12.3412	0.000443059	NM_027041	ENSMUSG00000028294	1700003M02Rik	RIKEN cDNA 1700003M02 gene [Source:MGI Symbol;Acc:MGI:1916579]
chr11	101987056	101987753	698	+	0.978815	2.91011	12.1403	0.00049344	NM_029287	ENSMUSG00000010841	1700006E09Rik	RIKEN cDNA 1700006E09 gene [Source:MGI Symbol;Acc:MGI:1922687]
chr8	75448694	75450854	2161	+	1.10396	2.55266	12.013	0.000528295	NM_001164235	ENSMUSG00000031620	1700007B14Rik	RIKEN cDNA 1700007B14 gene [Source:MGI Symbol;Acc:MGI:1919081]
chr8	75448694	75450736	2043	+	1.17358	2.53561	13.2426	0.000273657	NM_027944	ENSMUSG00000031620	1700007B14Rik	RIKEN cDNA 1700007B14 gene [Source:MGI Symbol;Acc:MGI:1919081]
chr11	59725917	59727027	1111	+	1.18194	2.24364	9.4872	0.0020691	NR_045476	ENSMUSG00000086330	1700007J10Rik	RIKEN cDNA 1700007J10 gene [Source:MGI Symbol;Acc:MGI:1916570]
chr15	101447745	101448647	903	+	-0.623799	3.32615	7.70454	0.00550821	NM_025487	ENSMUSG00000063971	1700011A15Rik	RIKEN cDNA 1700011A15 gene [Source:MGI Symbol;Acc:MGI:1913572]
chr2	45696605	45697239	635	+	1.23253	1.99199	10.3903	0.00126678	NR_040497	ENSMUSG00000086202	1700019E08Rik	RIKEN cDNA 1700019E08 gene [Source:MGI Symbol;Acc:MGI:1916655]
chr2	110031250	110032229	980	+	1.54034	2.07233	15.2423	9.45604e-05	NR_040508	ENSMUSG00000086186	1700024P03Rik	RIKEN cDNA 1700024P03 gene [Source:MGI Symbol;Acc:MGI:1922767]
chr16	3905798	3906894	1097	+	1.07423	2.20635	9.63936	0.00190452	NM_028484	ENSMUSG00000005983	1700037C18Rik	RIKEN cDNA 1700037C18 gene [Source:MGI Symbol;Acc:MGI:1920511]
chr4	57359792	57361774	1983	+	0.813248	2.8514	9.1189	0.00252982	NR_038179	ENSMUSG00000087044	1700042G15Rik	RIKEN cDNA 1700042G15 gene [Source:MGI Symbol;Acc:MGI:1920599]
chr4	57359792	57361821	2030	+	0.813248	2.8514	9.1189	0.00252982	NR_038178	ENSMUSG00000087044	1700042G15Rik	RIKEN cDNA 1700042G15 gene [Source:MGI Symbol;Acc:MGI:1920599]
chr2	118304914	118305358	445	+	2.02535	1.97152	24.6821	6.76102e-07	NR_045919	ENSMUSG00000085889	1700054M17Rik	RIKEN cDNA 1700054M17 gene [Source:MGI Symbol;Acc:MGI:1920608]
chr4	124449626	124450605	980	+	0.863871	2.57699	7.5548	0.00598504	NR_040774	ENSMUSG00000084757	1700057H15Rik	RIKEN cDNA 1700057H15 gene [Source:MGI Symbol;Acc:MGI:1925710]
chr18	56588348	56588911	564	+	-0.598551	4.96137	15.6712	7.53638e-05	NM_026099	ENSMUSG00000032900	1700065I17Rik	RIKEN cDNA 1700065I17 gene [Source:MGI Symbol;Acc:MGI:1914593]
chr9	108392834	108393931	1098	+	-0.37499	4.72898	7.92683	0.00487069	NM_053216	ENSMUSG00000032611	1700102P08Rik	RIKEN cDNA 1700102P08 gene [Source:MGI Symbol;Acc:MGI:2148248]
chr4	11966574	11967639	1066	+	1.38694	1.85769	11.0498	0.000886966	NR_040577	ENSMUSG00000085614	1700123M08Rik	RIKEN cDNA 1700123M08 gene [Source:MGI Symbol;Acc:MGI:1923915]
chr19	8888883	8889536	654	+	0.78108	2.72306	7.63935	0.00571086	NM_025463	ENSMUSG00000071653	1810009A15Rik	RIKEN cDNA 1810009A15 gene [Source:MGI Symbol;Acc:MGI:1913526]
chr10	77978650	77980345	1696	+	-0.483653	5.04344	7.84456	0.00509738	NM_026431	ENSMUSG00000020284	1810043G02Rik	RIKEN cDNA 1810043G02 gene [Source:MGI Symbol;Acc:MGI:1915134]
chr4	155409190	155411626	2437	+	-0.359549	5.45071	8.87451	0.0028918	NM_001166029	ENSMUSG00000042233	2010015L04Rik	RIKEN cDNA 2010015L04 gene [Source:MGI Symbol;Acc:MGI:1917130]
chr11	5762150	5763989	1840	+	0.535471	3.88308	8.42835	0.00369416	NR_015577	ENSMUSG00000083844	2210015D19Rik	RIKEN cDNA 2210015D19 gene [Source:MGI Symbol;Acc:MGI:1913774]
chr13	58380046	58382867	2822	+	-0.494761	5.2481	19.2197	1.16506e-05	NM_027335	ENSMUSG00000021550	2210016F16Rik	RIKEN cDNA 2210016F16 gene [Source:MGI Symbol;Acc:MGI:1917403]
chr4	73939371	73940328	958	+	1.45539	1.64247	9.31388	0.00227425	NM_027104	ENSMUSG00000028396	2310002L09Rik	RIKEN cDNA 2310002L09 gene [Source:MGI Symbol;Acc:MGI:1916780]
chr2	155097791	155099184	1394	+	0.977826	2.93226	12.9833	0.000314287	NR_040634	ENSMUSG00000087254	2310005A03Rik	RIKEN cDNA 2310005A03 gene [Source:MGI Symbol;Acc:MGI:1923981]
chr7	90124836	90125308	473	+	0.723731	2.92449	8.14322	0.00432224	NR_046006	ENSMUSG00000097162	2310010J17Rik	RIKEN cDNA 2310010J17 gene [Source:MGI Symbol;Acc:MGI:1925579]
chr12	17004958	17006755	1798	+	0.621865	3.3152	7.72024	0.0054605	NM_001201332	ENSMUSG00000071398	2410004P03Rik	RIKEN cDNA 2410004P03 gene [Source:MGI Symbol;Acc:MGI:1920917]
chr12	22953997	22955403	1407	+	1.02649	1.98649	7.58185	0.00589587	NR_015504	ENSMUSG00000073164	2410018L13Rik	RIKEN cDNA 2410018L13 gene [Source:MGI Symbol;Acc:MGI:1916982]
chr16	18836580	18837811	1232	+	1.19354	2.06468	7.98582	0.00471451	NM_001033164	ENSMUSG00000071632	2510002D24Rik	RIKEN cDNA 2510002D24 gene [Source:MGI Symbol;Acc:MGI:1919557]
chr8	20385782	20389790	4009	+	0.477971	5.10613	8.66485	0.00324407	NR_028428	ENSMUSG00000071793	2610005L07Rik	RIKEN cDNA 2610005L07 gene [Source:MGI Symbol;Acc:MGI:1914283]
chr10	79064374	79068602	4229	+	0.8439	3.43937	7.45726	0.0063181	NM_001004362	ENSMUSG00000060301	2610008E11Rik	RIKEN cDNA 2610008E11 gene [Source:MGI Symbol;Acc:MGI:1919378]
chr13	28460034	28462536	2503	+	0.746435	3.75578	9.69762	0.00184507	NR_045053	ENSMUSG00000085936	2610307P16Rik	RIKEN cDNA 2610307P16 gene [Source:MGI Symbol;Acc:MGI:1919768]
chr11	69897358	69899031	1674	+	0.745644	3.34432	6.96505	0.00831173	NM_027419	ENSMUSG00000018570	2810408A11Rik	RIKEN cDNA 2810408A11 gene [Source:MGI Symbol;Acc:MGI:1917669]
chr9	65890323	65892709	2387	+	1.32091	2.55298	15.6679	7.54966e-05	NM_026515	ENSMUSG00000040204	2810417H13Rik	RIKEN cDNA 2810417H13 gene [Source:MGI Symbol;Acc:MGI:1915276]
chr11	102619507	102620840	1334	+	1.29915	2.04566	10.4474	0.00122824	NR_033474	ENSMUSG00000086283	2810433D01Rik	RIKEN cDNA 2810433D01 gene [Source:MGI Symbol;Acc:MGI:1924382]
chr5	25100975	25103007	2033	+	0.826172	2.47252	7.14372	0.00752271	NR_027851	ENSMUSG00000043833	2900005J15Rik	RIKEN cDNA 2900005J15 gene [Source:MGI Symbol;Acc:MGI:1914511]
chr2	115493513	115496156	2644	+	1.06915	2.42286	9.91561	0.00163882	NR_030712	ENSMUSG00000085582	3110099E03Rik	RIKEN cDNA 3110099E03 gene [Source:MGI Symbol;Acc:MGI:1925761]
chr3	154711133	154713141	2009	+	-0.517396	5.04945	7.3681	0.00663911	NM_175176	ENSMUSG00000042943	4922501L14Rik	RIKEN cDNA 4922501L14 gene [Source:MGI Symbol;Acc:MGI:1919095]
chr16	91011249	91012226	978	+	1.07867	2.46801	11.534	0.000683352	NR_028368	ENSMUSG00000087354	4930404I05Rik	RIKEN cDNA 4930404I05 gene [Source:MGI Symbol;Acc:MGI:1914644]
chr2	117821928	117823203	1276	+	1.4406	2.21678	10.1411	0.00144999	NR_040631	ENSMUSG00000086221	4930412B13Rik	RIKEN cDNA 4930412B13 gene [Source:MGI Symbol;Acc:MGI:1921188]
chr15	98571004	98571569	566	+	1.87885	1.58383	12.7774	0.000350834	NM_001201322	ENSMUSG00000022993	4930415O20Rik	RIKEN cDNA 4930415O20 gene [Source:MGI Symbol;Acc:MGI:1921113]
chr3	121670763	121671889	1127	+	1.01743	2.14867	8.01639	0.00463558	NM_001033814	ENSMUSG00000074248	4930432M17Rik	RIKEN cDNA 4930432M17 gene [Source:MGI Symbol;Acc:MGI:3588188]
chr1	16065979	16066695	717	+	0.823194	2.51677	7.52574	0.00608234	NM_001243238	ENSMUSG00000067795	4930444P10Rik	RIKEN cDNA 4930444P10 gene [Source:MGI Symbol;Acc:MGI:1923049]
chr7	126830474	126830948	475	+	1.12426	2.01524	8.45892	0.00363257	NM_183131	ENSMUSG00000045989	4930451I11Rik	RIKEN cDNA 4930451I11 gene [Source:MGI Symbol;Acc:MGI:1925368]
chr2	104559184	104559765	582	+	1.21115	1.72443	7.24854	0.00709587	NR_040322	ENSMUSG00000086454	4930500J02Rik	RIKEN cDNA 4930500J02 gene [Source:MGI Symbol;Acc:MGI:1922209]
chr14	44163167	44164455	1289	+	1.12273	1.8208	7.1553	0.0074743	NM_029131	ENSMUSG00000072595	4930503E14Rik	RIKEN cDNA 4930503E14 gene [Source:MGI Symbol;Acc:MGI:1922204]
chr13	30615043	30616178	1136	+	1.27091	2.20088	9.37727	0.00219692	NR_045975	ENSMUSG00000086263	4930519D14Rik	RIKEN cDNA 4930519D14 gene [Source:MGI Symbol;Acc:MGI:1922340]
chr9	114368862	114369955	1094	+	0.955998	3.32351	6.90556	0.00859279	NR_040384	ENSMUSG00000074039	4930520O04Rik	RIKEN cDNA 4930520O04 gene [Source:MGI Symbol;Acc:MGI:1922366]
chrX	7573600	7577055	3456	+	0.662589	3.21808	8.66448	0.00324472	NR_029473	ENSMUSG00000039545	4930524L23Rik	RIKEN cDNA 4930524L23 gene [Source:MGI Symbol;Acc:MGI:1925435]
chr2	113691053	113692081	1029	+	1.29316	1.94474	10.1878	0.00141373	NR_040614	ENSMUSG00000084798	4930533B01Rik	RIKEN cDNA 4930533B01 gene [Source:MGI Symbol;Acc:MGI:1922416]
chrX	58911461	58913032	1572	+	-0.761148	2.76582	7.54723	0.00601025	NM_023774	ENSMUSG00000046180	4930550L24Rik	RIKEN cDNA 4930550L24 gene [Source:MGI Symbol;Acc:MGI:1922602]
chr3	138164135	138165732	1598	+	-0.400016	5.51931	11.0175	0.000902575	NM_001163386	ENSMUSG00000012042	4930579F01Rik	RIKEN cDNA 4930579F01 gene [Source:MGI Symbol;Acc:MGI:1914991]
chr3	138164135	138165849	1715	+	-0.387929	5.58289	11.5451	0.000679298	NM_001163385	ENSMUSG00000012042	4930579F01Rik	RIKEN cDNA 4930579F01 gene [Source:MGI Symbol;Acc:MGI:1914991]
chr3	36863106	36878988	15883	+	0.539376	6.04765	7.57982	0.00590252	NM_172679	ENSMUSG00000037270	4932438A13Rik	RIKEN cDNA 4932438A13 gene [Source:MGI Symbol;Acc:MGI:2444631]
chr1	23100474	23102253	1780	+	-0.523242	5.18032	9.71821	0.00182452	NM_025746	ENSMUSG00000073730	4933415F23Rik	RIKEN cDNA 4933415F23 gene [Source:MGI Symbol;Acc:MGI:1914005]
chr10	116111664	116113917	2254	+	-0.519204	5.58331	7.35144	0.0067009	NM_001161855	ENSMUSG00000074734	4933416C03Rik	RIKEN cDNA 4933416C03 gene [Source:MGI Symbol;Acc:MGI:3588269]
chr2	159947341	159948467	1127	+	-0.676259	3.90286	11.8837	0.000566288	NR_040498	ENSMUSG00000085198	4933416E03Rik	RIKEN cDNA 4933416E03 gene [Source:MGI Symbol;Acc:MGI:1918331]
chr13	34924409	34925452	1044	+	1.45988	2.00087	10.9501	0.000935982	NM_025750	ENSMUSG00000021415	4933417A18Rik	RIKEN cDNA 4933417A18 gene [Source:MGI Symbol;Acc:MGI:1914011]
chr4	33027139	33030988	3850	+	0.832625	3.73709	6.98308	0.00822838	NR_036602	ENSMUSG00000085037	4933421O10Rik	RIKEN cDNA 4933421O10 gene [Source:MGI Symbol;Acc:MGI:1918323]
chr7	120982509	120984391	1883	+	0.702547	3.85989	11.1778	0.000827799	NM_028955	ENSMUSG00000030877	4933427G17Rik	RIKEN cDNA 4933427G17 gene [Source:MGI Symbol;Acc:MGI:1921716]
chr5	128579130	128581534	2405	+	1.08018	3.23055	12.1874	0.000481139	NR_015517	ENSMUSG00000072591	5930412G12Rik	RIKEN cDNA 5930412G12 gene [Source:MGI Symbol;Acc:MGI:2442398]
chr4	63560360	63563989	3630	+	0.60465	4.65526	11.353	0.000753255	NM_144905	ENSMUSG00000045917	6330416G13Rik	RIKEN cDNA 6330416G13 gene [Source:MGI Symbol;Acc:MGI:1913920]
chr6	135197987	135202195	4209	+	-0.26839	6.15151	9.93872	0.00161838	NM_028982	ENSMUSG00000030207	8430419L09Rik	RIKEN cDNA 8430419L09 gene [Source:MGI Symbol;Acc:MGI:1921775]
chr10	120389523	120391772	2250	+	-0.396269	4.70963	8.68428	0.00320967	NR_040626	ENSMUSG00000090191	9230105E05Rik	RIKEN cDNA 9230105E05 gene [Source:MGI Symbol;Acc:MGI:2444388]
chr15	34349051	34349622	572	+	1.18058	2.06977	9.34642	0.00223421	NM_001256161	ENSMUSG00000094447	9430069I07Rik	RIKEN cDNA 9430069I07 gene [Source:MGI Symbol;Acc:MGI:1924608]
chr9	122572501	122576478	3978	+	0.782895	3.4941	8.67786	0.00322099	NR_015610	ENSMUSG00000097736	9530059O14Rik	RIKEN cDNA 9530059O14 gene [Source:MGI Symbol;Acc:MGI:2442421]
chr2	135580530	135582817	2288	+	0.830313	3.03931	8.27839	0.00401197	NR_015544	ENSMUSG00000085631	9630028H03Rik	RIKEN cDNA 9630028H03 gene [Source:MGI Symbol;Acc:MGI:2444526]
chr11	48946150	48950012	3863	+	0.727401	3.34527	8.27366	0.00402243	NM_001114679	ENSMUSG00000069893	9930111J21Rik1	RIKEN cDNA 9930111J21 gene 1 [Source:MGI Symbol;Acc:MGI:3041173]
chr11	48965817	48970622	4806	+	0.751543	3.911	7.75535	0.00535538	NM_173434	ENSMUSG00000069892	9930111J21Rik2	RIKEN cDNA 9930111J21 gene 2 [Source:MGI Symbol;Acc:MGI:3711310]
chr13	29016255	29017124	870	+	-0.706236	4.14424	13.5546	0.000231721	NR_045073	ENSMUSG00000086363	A330102I10Rik	RIKEN cDNA A330102I10 gene [Source:MGI Symbol;Acc:MGI:1925170]
chr2	118754145	118758860	4716	+	0.744562	3.73946	9.75708	0.00178634	NM_001001982	ENSMUSG00000045838	A430105I19Rik	RIKEN cDNA A430105I19 gene [Source:MGI Symbol;Acc:MGI:2685199]
chr2	114013565	114015114	1550	+	0.991588	2.26863	8.99412	0.00270849	NR_028423	ENSMUSG00000087694	A530058N18Rik	RIKEN cDNA A530058N18 gene [Source:MGI Symbol;Acc:MGI:2444858]
chr13	19727417	19730189	2773	+	0.867516	2.756	8.28813	0.0039905	NM_175688	ENSMUSG00000047462	A530099J19Rik	RIKEN cDNA A530099J19 gene [Source:MGI Symbol;Acc:MGI:2441809]
chr14	34051130	34052463	1334	+	0.830123	2.46881	7.03139	0.00800933	NM_001251843	ENSMUSG00000095493	A630023A22Rik	RIKEN cDNA A630023A22 gene [Source:MGI Symbol;Acc:MGI:2145657]
chr3	107230614	107231279	666	+	1.34545	1.69988	8.87098	0.00289739	NM_001256174	ENSMUSG00000094613	A630076J17Rik	RIKEN cDNA A630076J17 gene [Source:MGI Symbol;Acc:MGI:2442999]
chr14	64588115	64592153	4039	+	0.661174	3.5959	11.4831	0.000702338	NR_040709	ENSMUSG00000097545	A930011O12Rik	RIKEN cDNA A930011O12 gene [Source:MGI Symbol;Acc:MGI:2442197]
chr7	120421701	120426782	5082	+	0.811684	3.82055	11.7306	0.000614804	NM_001278944	ENSMUSG00000051900	Abca16	ATP-binding cassette, sub-family A (ABC1), member 16 [Source:MGI Symbol;Acc:MGI:2388711]
chr14	118482692	118488420	5729	+	-0.362283	7.87061	14.8113	0.00011882	NM_001033336	ENSMUSG00000032849	Abcc4	ATP-binding cassette, sub-family C (CFTR/MRP), member 4 [Source:MGI Symbol;Acc:MGI:2443111]
chr14	118482692	118488195	5504	+	-0.357823	7.78819	14.1815	0.000165993	NM_001163676	ENSMUSG00000032849	Abcc4	ATP-binding cassette, sub-family C (CFTR/MRP), member 4 [Source:MGI Symbol;Acc:MGI:2443111]
chr14	118482692	118488402	5711	+	-0.347217	7.88569	14.0972	0.000173602	NM_001163675	ENSMUSG00000032849	Abcc4	ATP-binding cassette, sub-family C (CFTR/MRP), member 4 [Source:MGI Symbol;Acc:MGI:2443111]
chr17	31057694	31063511	5818	+	-0.235814	6.97247	7.04116	0.00796572	NM_009593	ENSMUSG00000024030	Abcg1	ATP-binding cassette, sub-family G (WHITE), member 1 [Source:MGI Symbol;Acc:MGI:107704]
chr9	106440051	106441430	1380	+	0.714493	3.56909	8.47152	0.0036075	NM_001110271	ENSMUSG00000042210	Abhd14a	abhydrolase domain containing 14A [Source:MGI Symbol;Acc:MGI:1915894]
chr9	106440051	106441306	1256	+	0.714493	3.56909	8.47152	0.0036075	NM_145919	ENSMUSG00000042210	Abhd14a	abhydrolase domain containing 14A [Source:MGI Symbol;Acc:MGI:1915894]
chr16	56477846	56482539	4694	+	0.503926	5.65959	8.1648	0.00427113	NM_001014423	ENSMUSG00000035258	Abi3bp	ABI gene family, member 3 (NESH) binding protein [Source:MGI Symbol;Acc:MGI:2444583]
chr16	56477846	56482239	4394	+	0.533444	5.38555	7.55134	0.00599655	NM_178790	ENSMUSG00000035258	Abi3bp	ABI gene family, member 3 (NESH) binding protein [Source:MGI Symbol;Acc:MGI:2444583]
chr16	56477846	56482299	4454	+	0.541822	5.39125	7.6397	0.00570973	NM_001014422	ENSMUSG00000035258	Abi3bp	ABI gene family, member 3 (NESH) binding protein [Source:MGI Symbol;Acc:MGI:2444583]
chr16	56477846	56482347	4502	+	0.541822	5.39125	7.6397	0.00570973	NM_001014424	ENSMUSG00000035258	Abi3bp	ABI gene family, member 3 (NESH) binding protein [Source:MGI Symbol;Acc:MGI:2444583]
chr19	57033264	57039884	6621	+	-0.185127	6.52975	7.25381	0.00707507	NM_178688	ENSMUSG00000025085	Ablim1	actin-binding LIM protein 1 [Source:MGI Symbol;Acc:MGI:1194500]
chr5	121621029	121624649	3621	+	0.262139	5.45832	7.07756	0.00780551	NM_028037	ENSMUSG00000029456	Acad10	acyl-Coenzyme A dehydrogenase family, member 10 [Source:MGI Symbol;Acc:MGI:1919235]
chr5	121598281	121600655	2375	+	0.458716	4.06771	6.94359	0.00841203	NM_178799	ENSMUSG00000042647	Acad12	acyl-Coenzyme A dehydrogenase family, member 12 [Source:MGI Symbol;Acc:MGI:2443320]
chr3	153922353	153924414	2062	+	-0.240178	6.40273	8.15884	0.00428517	NM_007382	ENSMUSG00000062908	Acadm	acyl-Coenzyme A dehydrogenase, medium chain [Source:MGI Symbol;Acc:MGI:87867]
chr4	152186134	152187638	1505	+	-0.400431	5.54031	9.68817	0.00185458	NM_001146057	ENSMUSG00000028937	Acot7	acyl-CoA thioesterase 7 [Source:MGI Symbol;Acc:MGI:1917275]
chr4	152178100	152179593	1494	+	-0.399613	5.50874	9.48405	0.00207266	NM_133348	ENSMUSG00000028937	Acot7	acyl-CoA thioesterase 7 [Source:MGI Symbol;Acc:MGI:1917275]
chr4	152199844	152201210	1367	+	-0.397637	5.51202	9.38802	0.00218408	NM_001146058	ENSMUSG00000028937	Acot7	acyl-CoA thioesterase 7 [Source:MGI Symbol;Acc:MGI:1917275]
chr7	119760923	119763684	2762	+	1.1097	2.95722	10.4568	0.00122199	NM_016870	ENSMUSG00000030935	Acsm3	acyl-CoA synthetase medium-chain family member 3 [Source:MGI Symbol;Acc:MGI:99538]
chr7	119760923	119763477	2555	+	1.11939	2.89481	10.2759	0.00134781	NM_212442	ENSMUSG00000030935	Acsm3	acyl-CoA synthetase medium-chain family member 3 [Source:MGI Symbol;Acc:MGI:99538]
chr7	119760923	119763572	2650	+	1.11939	2.89481	10.2759	0.00134781	NM_212441	ENSMUSG00000030935	Acsm3	acyl-CoA synthetase medium-chain family member 3 [Source:MGI Symbol;Acc:MGI:99538]
chr2	155518043	155520875	2833	+	1.48074	2.81908	15.2642	9.34695e-05	NM_019811	ENSMUSG00000027605	Acss2	acyl-CoA synthetase short-chain family member 2 [Source:MGI Symbol;Acc:MGI:1890410]
chr12	70937857	70941877	4021	+	0.567163	4.85479	7.57078	0.0059322	NM_019785	ENSMUSG00000021076	Actr10	ARP10 actin-related protein 10 [Source:MGI Symbol;Acc:MGI:1891654]
chr11	20062304	20065972	3669	+	0.776314	3.53224	8.70784	0.00316844	NM_146243	ENSMUSG00000020152	Actr2	ARP2 actin-related protein 2 [Source:MGI Symbol;Acc:MGI:1913963]
chr1	125392905	125395650	2746	+	0.752512	3.81124	8.64677	0.00327642	NM_023735	ENSMUSG00000026341	Actr3	ARP3 actin-related protein 3 [Source:MGI Symbol;Acc:MGI:1921367]
chr1	125392905	125395455	2551	+	0.752512	3.81124	8.64677	0.00327642	NM_001205386	ENSMUSG00000026341	Actr3	ARP3 actin-related protein 3 [Source:MGI Symbol;Acc:MGI:1921367]
chr1	125392905	125395458	2554	+	0.752512	3.81124	8.64677	0.00327642	NM_001205385	ENSMUSG00000026341	Actr3	ARP3 actin-related protein 3 [Source:MGI Symbol;Acc:MGI:1921367]
chr9	70679001	70683589	4589	+	1.5464	3.54028	18.3311	1.85654e-05	NM_007399	ENSMUSG00000054693	Adam10	a disintegrin and metallopeptidase domain 10 [Source:MGI Symbol;Acc:MGI:109548]
chr5	8092260	8094928	2669	+	0.485168	4.97839	13.35	0.000258425	NM_001007221	ENSMUSG00000040537	Adam22	a disintegrin and metallopeptidase domain 22 [Source:MGI Symbol;Acc:MGI:1340046]
chr5	8092260	8095036	2777	+	0.50144	5.09255	13.4909	0.000239726	NM_001007220	ENSMUSG00000040537	Adam22	a disintegrin and metallopeptidase domain 22 [Source:MGI Symbol;Acc:MGI:1340046]
chr8	40675094	40677963	2870	+	1.037	2.33072	8.04358	0.00456653	NM_010086	ENSMUSG00000046723	Adam24	a disintegrin and metallopeptidase domain 24 (testase 1) [Source:MGI Symbol;Acc:MGI:105984]
chr14	68606879	68609988	3110	+	0.71815	3.60212	8.25961	0.00405369	NM_010082	ENSMUSG00000014725	Adam28	a disintegrin and metallopeptidase domain 28 [Source:MGI Symbol;Acc:MGI:105988]
chr14	68607732	68610371	2640	+	0.721326	3.58544	7.8687	0.00502978	NM_183366	ENSMUSG00000014725	Adam28	a disintegrin and metallopeptidase domain 28 [Source:MGI Symbol;Acc:MGI:105988]
chr14	68604998	68609051	4054	+	0.819003	3.73783	9.35631	0.00222219	NM_001048175	ENSMUSG00000014725	Adam28	a disintegrin and metallopeptidase domain 28 [Source:MGI Symbol;Acc:MGI:105988]
chr12	81419549	81421878	2330	+	1.11221	2.264	8.56774	0.00342171	NM_009620	ENSMUSG00000072972	Adam4	a disintegrin and metallopeptidase domain 4 [Source:MGI Symbol;Acc:MGI:104731]
chr14	68497337	68500804	3468	+	0.742423	4.07717	9.14228	0.00249769	NM_007402	ENSMUSG00000022056	Adam7	a disintegrin and metallopeptidase domain 7 [Source:MGI Symbol;Acc:MGI:107247]
chr15	94270163	94276281	6119	+	-0.310532	7.6233	8.62265	0.00332008	NM_177431	ENSMUSG00000022449	Adamts20	a disintegrin-like and metallopeptidase (reprolysin type) with thrombospondin type 1 motif, 20 [Source:MGI Symbol;Acc:MGI:2660628]
chr15	94320332	94327311	6980	+	-0.31002	7.35248	9.84621	0.00170182	NM_001164785	ENSMUSG00000022449	Adamts20	a disintegrin-like and metallopeptidase (reprolysin type) with thrombospondin type 1 motif, 20 [Source:MGI Symbol;Acc:MGI:2660628]
chr16	38445399	38446981	1583	+	-0.472237	5.80725	7.65752	0.00565361	NM_007414	ENSMUSG00000002844	Adprh	ADP-ribosylarginine hydrolase [Source:MGI Symbol;Acc:MGI:1098234]
chr14	66635251	66639527	4277	+	-0.418303	5.34296	8.62996	0.00330679	NM_013461	ENSMUSG00000045875	Adra1a	adrenergic receptor, alpha 1a [Source:MGI Symbol;Acc:MGI:104773]
chr1	177763178	177765730	2553	+	1.05636	3.26387	11.6182	0.000653106	NM_007422	ENSMUSG00000015961	Adss	adenylosuccinate synthetase, non muscle [Source:MGI Symbol;Acc:MGI:87948]
chr6	140624298	140625209	912	+	0.771159	3.58006	7.9776	0.00473597	NM_009637	ENSMUSG00000030232	Aebp2	AE binding protein 2 [Source:MGI Symbol;Acc:MGI:1338038]
chr19	56912354	56916268	3915	+	-0.240303	6.469	7.62283	0.00576341	NM_001177797	ENSMUSG00000025083	Afap1l2	actin filament associated protein 1-like 2 [Source:MGI Symbol;Acc:MGI:2147658]
chr19	56912354	56916322	3969	+	-0.235612	6.47143	7.45879	0.00631273	NM_001177796	ENSMUSG00000025083	Afap1l2	actin filament associated protein 1-like 2 [Source:MGI Symbol;Acc:MGI:2147658]
chr19	56912354	56916374	4021	+	-0.235587	6.47478	7.56597	0.00594806	NM_146102	ENSMUSG00000025083	Afap1l2	actin filament associated protein 1-like 2 [Source:MGI Symbol;Acc:MGI:2147658]
chr4	110397698	110399356	1659	+	0.993114	3.39782	9.92644	0.00162921	NM_001284190	ENSMUSG00000061298	Agbl4	ATP/GTP binding protein-like 4 [Source:MGI Symbol;Acc:MGI:1918244]
chr4	110397698	110399663	1966	+	1.04293	3.41327	10.9489	0.00093658	NM_001048189	ENSMUSG00000061298	Agbl4	ATP/GTP binding protein-like 4 [Source:MGI Symbol;Acc:MGI:1918244]
chr4	110397698	110399597	1900	+	1.04293	3.41327	10.9489	0.00093658	NM_030231	ENSMUSG00000061298	Agbl4	ATP/GTP binding protein-like 4 [Source:MGI Symbol;Acc:MGI:1918244]
chr4	126340678	126348312	7635	+	0.445994	5.6128	9.36773	0.00220839	NM_153402	ENSMUSG00000028842	Ago3	argonaute RISC catalytic subunit 3 [Source:MGI Symbol;Acc:MGI:2446634]
chr2	75832177	75839535	7359	+	0.938591	4.32953	13.0156	0.000308911	NM_172666	ENSMUSG00000042410	Agps	alkylglycerone phosphate synthase [Source:MGI Symbol;Acc:MGI:2443065]
chr8	105566695	105567361	667	+	0.856202	2.56882	8.61071	0.00334191	NM_007427	ENSMUSG00000005705	Agrp	agouti related protein [Source:MGI Symbol;Acc:MGI:892013]
chr13	59580176	59583329	3154	+	0.584125	3.43112	7.19301	0.00731879	NR_045633	ENSMUSG00000021557	Agtpbp1	ATP/GTP binding protein 1 [Source:MGI Symbol;Acc:MGI:2159437]
chr13	30336356	30338639	2284	+	-0.448783	5.18654	8.42604	0.00369885	NM_177322	ENSMUSG00000049115	Agtr1a	angiotensin II receptor, type 1a [Source:MGI Symbol;Acc:MGI:87964]
chr13	74211118	74215849	4732	+	0.816392	3.28868	8.48935	0.00357231	NM_009644	ENSMUSG00000021575	Ahrr	aryl-hydrocarbon receptor repressor [Source:MGI Symbol;Acc:MGI:1333776]
chr4	58800031	58805931	5901	+	0.876379	4.70863	9.90486	0.00164843	NM_172381	ENSMUSG00000050812	AI314180	expressed sequence AI314180 [Source:MGI Symbol;Acc:MGI:2140220]
chr3	154330821	154332984	2164	+	0.895338	2.8161	8.36373	0.00382784	NR_040387	ENSMUSG00000093738	AI606473	expressed sequence AI606473 [Source:MGI Symbol;Acc:MGI:2139767]
chr2	129178148	129179153	1006	+	0.880797	2.71677	8.96752	0.00274822	NR_045264	ENSMUSG00000084826	AI847159	expressed sequence AI847159 [Source:MGI Symbol;Acc:MGI:3528181]
chr9	8076633	8080279	3647	+	0.723463	4.01594	11.0427	0.000890374	NM_001045524	ENSMUSG00000040729	AK129341	cDNA sequence AK129341 [Source:MGI Symbol;Acc:MGI:2680221]
chrX	36608183	36614335	6153	+	0.55932	3.91729	9.07996	0.00258426	NM_001081956	ENSMUSG00000059708	Akap17b	A kinase (PRKA) anchor protein 17B [Source:MGI Symbol;Acc:MGI:2443758]
chr12	52699383	52709645	10263	+	-0.22721	7.53363	7.29222	0.00692539	NM_198111	ENSMUSG00000061603	Akap6	A kinase (PRKA) anchor protein 6 [Source:MGI Symbol;Acc:MGI:3050566]
chr4	34550615	34552333	1719	+	1.23309	2.02115	7.65191	0.00567123	NM_001007589	ENSMUSG00000028291	Akirin2	akirin 2 [Source:MGI Symbol;Acc:MGI:1889364]
chr6	34412362	34413609	1248	+	0.733792	3.19201	7.3454	0.00672345	NM_009731	ENSMUSG00000052131	Akr1b7	aldo-keto reductase family 1, member B7 [Source:MGI Symbol;Acc:MGI:101918]
chr13	4233740	4234981	1242	+	1.77021	1.74532	14.8591	0.000115849	NM_001013785	ENSMUSG00000071551	Akr1c19	aldo-keto reductase family 1, member C19 [Source:MGI Symbol;Acc:MGI:2653678]
chr13	4592490	4594202	1713	+	1.1413	2.65301	14.4953	0.000140511	NM_018859	ENSMUSG00000045410	Akr1e1	aldo-keto reductase family 1, member E1 [Source:MGI Symbol;Acc:MGI:1914758]
chr9	106233455	106236156	2702	+	-0.380016	5.92137	7.75981	0.00534215	NM_020559	ENSMUSG00000032786	Alas1	aminolevulinic acid synthase 1 [Source:MGI Symbol;Acc:MGI:87989]
chr19	20692953	20695012	2060	+	1.25629	2.64489	9.93193	0.00162436	NM_011921	ENSMUSG00000024747	Aldh1a7	aldehyde dehydrogenase family 1, subfamily A7 [Source:MGI Symbol;Acc:MGI:1347050]
chr12	87428078	87430025	1948	+	1.47992	3.24896	41.2644	1.32971e-10	NM_001102565	ENSMUSG00000079036	Alkbh1	alkB, alkylation repair homolog 1 (E. coli) [Source:MGI Symbol;Acc:MGI:2384034]
chr6	85587531	85597514	9984	+	0.586916	4.9414	7.63979	0.00570946	NM_145223	ENSMUSG00000063810	Alms1	Alstrom syndrome 1 [Source:MGI Symbol;Acc:MGI:1934606]
chr11	69183885	69187157	3273	+	0.986987	3.39452	7.13257	0.00756962	NM_009661	ENSMUSG00000020891	Alox8	arachidonate 8-lipoxygenase [Source:MGI Symbol;Acc:MGI:1098228]
chr18	65265531	65272778	7248	+	-0.275382	6.85398	10.1606	0.00143477	NM_001037294	ENSMUSG00000032845	Alpk2	alpha-kinase 2 [Source:MGI Symbol;Acc:MGI:2449492]
chr5	88456011	88457862	1852	+	1.1924	2.69249	10.26	0.00135946	NM_009664	ENSMUSG00000029288	Ambn	ameloblastin [Source:MGI Symbol;Acc:MGI:104655]
chr10	40287458	40290663	3206	+	-0.376191	4.94684	6.88086	0.00871234	NM_009665	ENSMUSG00000075232	Amd1	S-adenosylmethionine decarboxylase 1 [Source:MGI Symbol;Acc:MGI:88004]
chr10	40287465	40290661	3197	+	-0.376191	4.94684	6.88086	0.00871234	NM_007444	ENSMUSG00000063953	Amd2	S-adenosylmethionine decarboxylase 2 [Source:MGI Symbol;Acc:MGI:1333111]
chr18	31759824	31764604	4781	+	0.994982	3.19441	10.6295	0.00111297	NM_153515	ENSMUSG00000041915	Ammecr1l	AMME chromosomal region gene 1-like [Source:MGI Symbol;Acc:MGI:2442711]
chr18	31760616	31765597	4982	+	1.01033	3.1926	10.5268	0.00117656	NM_001242430	ENSMUSG00000041915	Ammecr1l	AMME chromosomal region gene 1-like [Source:MGI Symbol;Acc:MGI:2442711]
chr12	111271111	111272795	1685	+	0.766485	3.41452	9.03039	0.00265528	NM_033603	ENSMUSG00000021278	Amn	amnionless [Source:MGI Symbol;Acc:MGI:1934943]
chr5	52834135	52836802	2668	+	0.542257	4.83531	8.54719	0.00346056	NM_024213	ENSMUSG00000029176	Anapc4	anaphase promoting complex subunit 4 [Source:MGI Symbol;Acc:MGI:1098673]
chr14	51195486	51195923	438	+	1.38256	1.77387	7.48067	0.00623649	NM_007449	ENSMUSG00000047894	Ang2	angiogenin, ribonuclease A family, member 2 [Source:MGI Symbol;Acc:MGI:104984]
chr10	69533708	69543615	9908	+	-0.331951	8.11248	9.46373	0.00209575	NM_170729	ENSMUSG00000069601	Ank3	ankyrin 3, epithelial [Source:MGI Symbol;Acc:MGI:88026]
chr10	69533708	69543669	9962	+	-0.331406	8.11348	9.46851	0.00209029	NM_170690	ENSMUSG00000069601	Ank3	ankyrin 3, epithelial [Source:MGI Symbol;Acc:MGI:88026]
chr10	69533708	69543678	9971	+	-0.323799	8.12397	9.13682	0.00250516	NM_170689	ENSMUSG00000069601	Ank3	ankyrin 3, epithelial [Source:MGI Symbol;Acc:MGI:88026]
chr10	69533708	69543732	10025	+	-0.32327	8.12496	9.13985	0.00250101	NM_146005	ENSMUSG00000069601	Ank3	ankyrin 3, epithelial [Source:MGI Symbol;Acc:MGI:88026]
chr10	69533708	69543027	9320	+	-0.317236	8.02953	8.87504	0.00289095	NM_170728	ENSMUSG00000069601	Ank3	ankyrin 3, epithelial [Source:MGI Symbol;Acc:MGI:88026]
chr10	69533708	69543144	9437	+	-0.308217	8.04274	8.53206	0.00348944	NM_170688	ENSMUSG00000069601	Ank3	ankyrin 3, epithelial [Source:MGI Symbol;Acc:MGI:88026]
chr10	69925532	69933085	7554	+	-0.292492	7.40366	7.30713	0.00686816	NM_170687	ENSMUSG00000069601	Ank3	ankyrin 3, epithelial [Source:MGI Symbol;Acc:MGI:88026]
chr2	136532321	136535043	2723	+	-0.426768	5.66906	11.3453	0.000756384	NM_175667	ENSMUSG00000074771	Ankef1	ankyrin repeat and EF-hand domain containing 1 [Source:MGI Symbol;Acc:MGI:2441685]
chr8	122883822	122892540	8719	+	-0.393607	7.77369	7.53137	0.00606338	NM_001081379	ENSMUSG00000035569	Ankrd11	ankyrin repeat domain 11 [Source:MGI Symbol;Acc:MGI:1924337]
chr19	34122549	34124302	1754	+	1.3636	2.87372	12.6651	0.000372548	NM_024204	ENSMUSG00000024774	Ankrd22	ankyrin repeat domain 22 [Source:MGI Symbol;Acc:MGI:1277101]
chr7	92584183	92586964	2782	+	0.752563	3.4808	9.59477	0.00195132	NM_028665	ENSMUSG00000041343	Ankrd42	ankyrin repeat domain 42 [Source:MGI Symbol;Acc:MGI:1921095]
chr17	43534174	43535494	1321	+	1.08849	2.08114	8.88999	0.00286739	NM_001254953	ENSMUSG00000096140	Ankrd66	ankyrin repeat domain 66 [Source:MGI Symbol;Acc:MGI:1925106]
chr10	90576691	90581410	4720	+	0.469801	4.69351	10.3975	0.00126184	NM_001177398	ENSMUSG00000058589	Anks1b	ankyrin repeat and sterile alpha motif domain containing 1B [Source:MGI Symbol;Acc:MGI:1924781]
chr10	90576691	90581587	4897	+	0.555242	4.79497	13.4173	0.000249311	NM_001177396	ENSMUSG00000058589	Anks1b	ankyrin repeat and sterile alpha motif domain containing 1B [Source:MGI Symbol;Acc:MGI:1924781]
chr10	90576691	90581335	4645	+	0.724587	4.36955	13.397	0.000252028	NM_181398	ENSMUSG00000058589	Anks1b	ankyrin repeat and sterile alpha motif domain containing 1B [Source:MGI Symbol;Acc:MGI:1924781]
chr16	4941415	4943897	2483	+	0.527678	4.53475	9.60879	0.00193649	NM_028301	ENSMUSG00000022515	Anks3	ankyrin repeat and sterile alpha motif domain containing 3 [Source:MGI Symbol;Acc:MGI:1919865]
chr1	75192160	75193363	1204	+	0.706483	2.93588	7.39351	0.00654598	NM_001267620	ENSMUSG00000026199	Ankzf1	ankyrin repeat and zinc finger domain containing 1 [Source:MGI Symbol;Acc:MGI:1098746]
chr7	141101219	141104230	3012	+	0.417932	4.99513	8.20922	0.00416781	NM_178381	ENSMUSG00000054662	Ano9	anoctamin 9 [Source:MGI Symbol;Acc:MGI:1918595]
chr14	34053470	34055595	2126	+	0.546479	3.89203	7.65681	0.00565583	NM_172808	ENSMUSG00000047441	Antxrl	anthrax toxin receptor-like [Source:MGI Symbol;Acc:MGI:1925726]
chr8	62057042	62058821	1780	+	0.957072	2.91969	6.89087	0.00866371	NM_011922	ENSMUSG00000031635	Anxa10	annexin A10 [Source:MGI Symbol;Acc:MGI:1347090]
chr3	95296094	95297967	1874	+	0.635978	3.94898	8.78168	0.00304271	NM_001085383	ENSMUSG00000015702	Anxa9	annexin A9 [Source:MGI Symbol;Acc:MGI:1923711]
chr3	95296094	95297946	1853	+	0.681742	3.96982	10.2886	0.00133856	NM_023628	ENSMUSG00000015702	Anxa9	annexin A9 [Source:MGI Symbol;Acc:MGI:1923711]
chr5	137034994	137036270	1277	+	-0.367229	4.98661	6.96552	0.00830951	NM_007457	ENSMUSG00000004849	Ap1s1	adaptor protein complex AP-1, sigma 1 [Source:MGI Symbol;Acc:MGI:1098244]
chr18	62922327	62925125	2799	+	-0.463804	5.74064	8.00111	0.00467488	NM_133237	ENSMUSG00000071847	Apcdd1	adenomatosis polyposis coli down-regulated 1 [Source:MGI Symbol;Acc:MGI:3513977]
chr9	46228630	46229617	988	+	0.916024	3.08011	12.9673	0.000316978	NM_009692	ENSMUSG00000032083	Apoa1	apolipoprotein A-I [Source:MGI Symbol;Acc:MGI:88049]
chr7	19696244	19697494	1251	+	-0.600068	5.13313	10.5181	0.0011821	NM_009696	ENSMUSG00000002985	Apoe	apolipoprotein E [Source:MGI Symbol;Acc:MGI:88057]
chr15	77633951	77636007	2057	+	0.828245	2.77757	8.24189	0.00409346	NM_001143686	ENSMUSG00000091694	Apol11b	apolipoprotein L 11b [Source:MGI Symbol;Acc:MGI:3036248]
chr15	77388217	77390508	2292	+	0.78514	2.84486	8.26092	0.00405076	NM_001164640	ENSMUSG00000010601	Apol7a	apolipoprotein L 7a [Source:MGI Symbol;Acc:MGI:1923011]
chr15	77388217	77390608	2392	+	0.831084	2.88061	9.64805	0.00189553	NM_029419	ENSMUSG00000010601	Apol7a	apolipoprotein L 7a [Source:MGI Symbol;Acc:MGI:1923011]
chr12	111713269	111714329	1061	+	0.749454	3.66185	10.7634	0.00103527	NM_026511	ENSMUSG00000037787	Apopt1	apoptogenic, mitochondrial 1 [Source:MGI Symbol;Acc:MGI:1915270]
chr16	84954436	84957735	3300	+	-0.306357	7.08062	6.98826	0.00820463	NM_001198824	ENSMUSG00000022892	App	amyloid beta (A4) precursor protein [Source:MGI Symbol;Acc:MGI:88059]
chr8	122574637	122575502	866	+	0.865905	2.37662	7.09313	0.007738	NM_009698	ENSMUSG00000006589	Aprt	adenine phosphoribosyl transferase [Source:MGI Symbol;Acc:MGI:88061]
chr10	24915207	24916683	1477	+	0.656427	3.8388	9.31723	0.00227009	NM_007482	ENSMUSG00000019987	Arg1	arginase, liver [Source:MGI Symbol;Acc:MGI:88070]
chr7	123279149	123282635	3487	+	0.333224	5.43785	7.92158	0.00488487	NM_144529	ENSMUSG00000030766	Arhgap17	Rho GTPase activating protein 17 [Source:MGI Symbol;Acc:MGI:1917747]
chr7	123279149	123282683	3535	+	0.334471	5.44231	8.14067	0.00432833	NM_001122640	ENSMUSG00000030766	Arhgap17	Rho GTPase activating protein 17 [Source:MGI Symbol;Acc:MGI:1917747]
chr7	123279149	123282450	3302	+	0.436143	5.105	9.17165	0.00245792	NM_001122643	ENSMUSG00000030766	Arhgap17	Rho GTPase activating protein 17 [Source:MGI Symbol;Acc:MGI:1917747]
chr7	123279149	123282401	3253	+	0.445678	5.08236	9.11502	0.00253519	NM_001122641	ENSMUSG00000030766	Arhgap17	Rho GTPase activating protein 17 [Source:MGI Symbol;Acc:MGI:1917747]
chr7	123279149	123282449	3301	+	0.447074	5.08801	9.29145	0.00230226	NM_001122642	ENSMUSG00000030766	Arhgap17	Rho GTPase activating protein 17 [Source:MGI Symbol;Acc:MGI:1917747]
chr11	103359373	103361470	2098	+	1.04384	2.72062	13.602	0.000225947	NM_183288	ENSMUSG00000034255	Arhgap27	Rho GTPase activating protein 27 [Source:MGI Symbol;Acc:MGI:1916903]
chr8	14911663	14917190	5528	+	-0.331295	7.38432	7.49325	0.00619306	NM_172751	ENSMUSG00000071176	Arhgef10	Rho guanine nucleotide exchange factor (GEF) 10 [Source:MGI Symbol;Acc:MGI:2444453]
chr8	14911663	14917073	5411	+	-0.322411	7.34001	7.13653	0.00755293	NM_001037736	ENSMUSG00000071176	Arhgef10	Rho guanine nucleotide exchange factor (GEF) 10 [Source:MGI Symbol;Acc:MGI:2444453]
chr13	14063784	14069896	6113	+	0.75936	4.43877	7.99627	0.00468738	NM_194262	ENSMUSG00000039219	Arid4b	AT rich interactive domain 4B (RBP1-like) [Source:MGI Symbol;Acc:MGI:2137512]
chr13	14063784	14069635	5852	+	0.91675	4.17454	10.7759	0.00102831	NM_198122	ENSMUSG00000039219	Arid4b	AT rich interactive domain 4B (RBP1-like) [Source:MGI Symbol;Acc:MGI:2137512]
chr12	40033291	40036947	3657	+	1.23843	2.79707	8.58547	0.00338856	NM_007487	ENSMUSG00000047446	Arl4a	ADP-ribosylation factor-like 4A [Source:MGI Symbol;Acc:MGI:99437]
chr12	40033291	40036983	3693	+	1.27855	2.78781	8.97367	0.00273899	NM_001039515	ENSMUSG00000047446	Arl4a	ADP-ribosylation factor-like 4A [Source:MGI Symbol;Acc:MGI:99437]
chr2	52397951	52403162	5212	+	0.738937	3.37213	7.06984	0.00783923	NM_182994	ENSMUSG00000036093	Arl5a	ADP-ribosylation factor-like 5A [Source:MGI Symbol;Acc:MGI:1922673]
chrX	134756568	134759952	3385	+	0.736951	3.27207	11.6053	0.000657637	NM_027870	ENSMUSG00000049047	Armcx3	armadillo repeat containing, X-linked 3 [Source:MGI Symbol;Acc:MGI:1918953]
chr1	152766542	152768438	1897	+	0.612941	3.45858	9.53852	0.00201204	NM_026369	ENSMUSG00000008475	Arpc5	actin related protein 2/3 complex, subunit 5 [Source:MGI Symbol;Acc:MGI:1915021]
chr9	112154463	112157055	2593	+	0.78322	3.19706	8.20147	0.00418565	NM_001177619	ENSMUSG00000032503	Arpp21	cyclic AMP-regulated phosphoprotein, 21 [Source:MGI Symbol;Acc:MGI:107562]
chr9	112180032	112183397	3366	+	0.917099	3.12786	9.05056	0.00262614	NM_001177620	ENSMUSG00000032503	Arpp21	cyclic AMP-regulated phosphoprotein, 21 [Source:MGI Symbol;Acc:MGI:107562]
chr9	112180032	112183359	3328	+	0.948341	3.11784	9.51662	0.00203619	NM_028755	ENSMUSG00000032503	Arpp21	cyclic AMP-regulated phosphoprotein, 21 [Source:MGI Symbol;Acc:MGI:107562]
chr9	112180032	112183450	3419	+	0.948341	3.11784	9.51662	0.00203619	NM_001177615	ENSMUSG00000032503	Arpp21	cyclic AMP-regulated phosphoprotein, 21 [Source:MGI Symbol;Acc:MGI:107562]
chr3	81996922	81998578	1657	+	0.613829	3.36178	7.56667	0.00594576	NM_021370	ENSMUSG00000028008	Asic5	acid-sensing (proton-gated) ion channel family member 5 [Source:MGI Symbol;Acc:MGI:1929259]
chr4	9575262	9577780	2519	+	0.858142	3.13796	7.73122	0.0054274	NM_001177854	ENSMUSG00000028207	Asph	aspartate-beta-hydroxylase [Source:MGI Symbol;Acc:MGI:1914186]
chr4	9628646	9631598	2953	+	0.926503	2.9053	9.02581	0.00266194	NM_001177856	ENSMUSG00000028207	Asph	aspartate-beta-hydroxylase [Source:MGI Symbol;Acc:MGI:1914186]
chr4	9575262	9577918	2657	+	0.937107	3.29765	9.48174	0.00207527	NM_001177853	ENSMUSG00000028207	Asph	aspartate-beta-hydroxylase [Source:MGI Symbol;Acc:MGI:1914186]
chr4	9575262	9578102	2841	+	0.939299	3.0293	8.89289	0.00286283	NM_001177851	ENSMUSG00000028207	Asph	aspartate-beta-hydroxylase [Source:MGI Symbol;Acc:MGI:1914186]
chr4	9575262	9577951	2690	+	0.982957	3.28263	10.1268	0.00146127	NM_001177852	ENSMUSG00000028207	Asph	aspartate-beta-hydroxylase [Source:MGI Symbol;Acc:MGI:1914186]
chr4	9575262	9578150	2889	+	0.9926	3.2618	10.348	0.00129613	NM_001177850	ENSMUSG00000028207	Asph	aspartate-beta-hydroxylase [Source:MGI Symbol;Acc:MGI:1914186]
chr4	9620910	9622670	1761	+	1.4929	2.52979	20.3152	6.56781e-06	NM_133723	ENSMUSG00000028207	Asph	aspartate-beta-hydroxylase [Source:MGI Symbol;Acc:MGI:1914186]
chr4	9620910	9622869	1960	+	1.54091	2.49378	20.6432	5.53324e-06	NM_001177855	ENSMUSG00000028207	Asph	aspartate-beta-hydroxylase [Source:MGI Symbol;Acc:MGI:1914186]
chr2	127338639	127341020	2382	+	1.0672	3.16257	9.41408	0.00215325	NM_172539	ENSMUSG00000050468	Astl	astacin-like metalloendopeptidase (M12 family) [Source:MGI Symbol;Acc:MGI:3046414]
chr11	80089400	80096671	7272	+	0.562027	4.978	8.56804	0.00342116	NM_001029856	ENSMUSG00000017550	Atad5	ATPase family, AAA domain containing 5 [Source:MGI Symbol;Acc:MGI:2442925]
chr1	71557156	71559766	2611	+	-0.275133	5.81883	8.58771	0.00338439	NM_026195	ENSMUSG00000026192	Atic	5-aminoimidazole-4-carboxamide ribonucleotide formyltransferase/IMP cyclohydrolase [Source:MGI Symbol;Acc:MGI:1351352]
chr1	133702674	133710965	8292	+	-0.185287	6.87394	8.09448	0.00444002	NM_001167949	ENSMUSG00000026463	Atp2b4	ATPase, Ca++ transporting, plasma membrane 4 [Source:MGI Symbol;Acc:MGI:88111]
chr1	133702674	133710774	8101	+	-0.180795	6.85213	7.5828	0.00589279	NM_213616	ENSMUSG00000026463	Atp2b4	ATPase, Ca++ transporting, plasma membrane 4 [Source:MGI Symbol;Acc:MGI:88111]
chr18	77773768	77776198	2431	+	-0.382434	5.93688	8.35918	0.00383743	NM_007505	ENSMUSG00000025428	Atp5a1	ATP synthase, H+ transporting, mitochondrial F1 complex, alpha subunit 1 [Source:MGI Symbol;Acc:MGI:88115]
chr16	84827871	84828628	758	+	0.993977	2.13254	7.20379	0.00727499	NM_016755	ENSMUSG00000022890	Atp5j	ATP synthase, H+ transporting, mitochondrial F0 complex, subunit F [Source:MGI Symbol;Acc:MGI:107777]
chr5	145183706	145184182	477	+	-0.533977	4.5085	10.7432	0.00104662	NM_020582	ENSMUSG00000038690	Atp5j2	ATP synthase, H+ transporting, mitochondrial F0 complex, subunit F2 [Source:MGI Symbol;Acc:MGI:1927558]
chr1	5083173	5085148	1976	+	0.957071	3.34051	9.17498	0.00245347	NM_133826	ENSMUSG00000033793	Atp6v1h	ATPase, H+ transporting, lysosomal V1 subunit H [Source:MGI Symbol;Acc:MGI:1914864]
chrX	106027224	106035418	8195	+	0.680979	4.08434	7.7824	0.00527578	NM_009726	ENSMUSG00000033792	Atp7a	ATPase, Cu++ transporting, alpha polypeptide [Source:MGI Symbol;Acc:MGI:99400]
chrX	106027224	106035421	8198	+	0.680979	4.08434	7.7824	0.00527578	NM_001109757	ENSMUSG00000033792	Atp7a	ATPase, Cu++ transporting, alpha polypeptide [Source:MGI Symbol;Acc:MGI:99400]
chr2	126320973	126326501	5529	+	0.511018	5.15536	9.2333	0.00237653	NM_001080944	ENSMUSG00000060131	Atp8b4	ATPase, class I, type 8B, member 4 [Source:MGI Symbol;Acc:MGI:1859664]
chr2	130906496	130915232	8737	+	0.479504	5.64538	9.25793	0.00234477	NM_009730	ENSMUSG00000027312	Atrn	attractin [Source:MGI Symbol;Acc:MGI:1341628]
chrX	105797615	105807858	10244	+	0.507657	4.75879	7.47952	0.00624047	NM_009530	ENSMUSG00000031229	Atrx	alpha thalassemia/mental retardation syndrome X-linked homolog (human) [Source:MGI Symbol;Acc:MGI:103067]
chr14	14012491	14019342	6852	+	0.248646	5.78026	6.90577	0.00859179	NM_139227	ENSMUSG00000021738	Atxn7	ataxin 7 [Source:MGI Symbol;Acc:MGI:2179277]
chr10	112925428	112929026	3599	+	0.913191	3.08449	9.98201	0.00158077	NM_001033474	ENSMUSG00000074748	Atxn7l3b	ataxin 7-like 3B [Source:MGI Symbol;Acc:MGI:1914971]
chr2	132598196	132599078	883	+	1.17187	1.857	7.32045	0.00681744	NR_033468	ENSMUSG00000074783	AU019990	expressed sequence AU019990 [Source:MGI Symbol;Acc:MGI:3034641]
chr16	5211819	5213190	1372	+	1.42273	1.97628	12.2482	0.000465704	NM_001033220	ENSMUSG00000051669	AU021092	expressed sequence AU021092 [Source:MGI Symbol;Acc:MGI:2146559]
chr11	79481723	79482760	1038	+	0.722432	3.18806	8.51467	0.00352294	NR_045305	ENSMUSG00000091523	AU040972	expressed sequence AU040972 [Source:MGI Symbol;Acc:MGI:2144426]
chr4	155831269	155832477	1209	+	-0.712919	3.80678	12.2052	0.000476567	NM_025338	ENSMUSG00000065990	Aurkaip1	aurora kinase A interacting protein 1 [Source:MGI Symbol;Acc:MGI:1913327]
chr9	39587396	39591688	4293	+	0.886039	3.2019	8.56876	0.00341981	NM_178737	ENSMUSG00000038112	AW551984	expressed sequence AW551984 [Source:MGI Symbol;Acc:MGI:2143322]
chr9	39587396	39591698	4303	+	0.899242	3.19409	8.74727	0.00310066	NM_001199556	ENSMUSG00000038112	AW551984	expressed sequence AW551984 [Source:MGI Symbol;Acc:MGI:2143322]
chr9	118040522	118045151	4630	+	1.03161	2.98553	7.91786	0.00489493	NM_013727	ENSMUSG00000039285	Azi2	5-azacytidine induced gene 2 [Source:MGI Symbol;Acc:MGI:1351332]
chr7	141359178	141362112	2935	+	0.928963	2.48916	9.23784	0.00237064	NR_033532	ENSMUSG00000086844	B230206H07Rik	RIKEN cDNA B230206H07 gene [Source:MGI Symbol;Acc:MGI:2444929]
chr2	68104672	68109893	5222	+	0.402907	5.06524	7.55757	0.00597585	NM_020283	ENSMUSG00000034780	B3galt1	UDP-Gal:betaGlcNAc beta 1,3-galactosyltransferase, polypeptide 1 [Source:MGI Symbol;Acc:MGI:1349403]
chr1	33745484	33747298	1815	+	-0.374122	4.88638	8.25124	0.00407241	NM_145392	ENSMUSG00000042215	Bag2	BCL2-associated athanogene 2 [Source:MGI Symbol;Acc:MGI:1891254]
chr5	144264525	144267772	3248	+	-0.284833	5.95478	8.01454	0.00464032	NM_025833	ENSMUSG00000038859	Baiap2l1	BAI1-associated protein 2-like 1 [Source:MGI Symbol;Acc:MGI:1914148]
chr19	5364633	5365606	974	+	1.20393	1.93389	7.44795	0.00635089	NM_011793	ENSMUSG00000024844	Banf1	barrier to autointegration factor 1 [Source:MGI Symbol;Acc:MGI:1346330]
chr19	5364633	5365398	766	+	1.25653	1.92094	8.06586	0.00451071	NM_001038231	ENSMUSG00000024844	Banf1	barrier to autointegration factor 1 [Source:MGI Symbol;Acc:MGI:1346330]
chr3	136053364	136056610	3247	+	0.654124	3.74922	7.68255	0.00557573	NM_001033350	ENSMUSG00000037922	Bank1	B cell scaffold protein with ankyrin repeats 1 [Source:MGI Symbol;Acc:MGI:2442120]
chr14	31251489	31254894	3406	+	-0.360845	5.79856	8.49809	0.00355519	NM_027088	ENSMUSG00000021901	Bap1	Brca1 associated protein 1 [Source:MGI Symbol;Acc:MGI:1206586]
chr1	71027535	71032982	5448	+	0.435748	5.11115	7.76167	0.00533666	NM_007525	ENSMUSG00000026196	Bard1	BRCA1 associated RING domain 1 [Source:MGI Symbol;Acc:MGI:1328361]
chr12	87618868	87622569	3702	+	0.839317	2.85536	10.3937	0.00126449	NM_001177573	ENSMUSG00000079031	BB287469	expressed sequence BB287469 [Source:MGI Symbol;Acc:MGI:3034635]
chr4	123712710	123713693	984	+	-0.473647	5.30949	7.47539	0.0062548	NR_002445	ENSMUSG00000081824	BC002163	cDNA sequence BC002163 [Source:MGI Symbol;Acc:MGI:3612445]
chr1	150361311	150364552	3242	+	0.748086	3.44585	7.8936	0.004961	NM_145511	ENSMUSG00000006010	BC003331	cDNA sequence BC003331 [Source:MGI Symbol;Acc:MGI:2385108]
chr1	150361311	150364456	3146	+	0.804553	3.40312	8.96356	0.00275417	NM_001077237	ENSMUSG00000006010	BC003331	cDNA sequence BC003331 [Source:MGI Symbol;Acc:MGI:2385108]
chr11	121222589	121225004	2416	+	0.893038	2.34752	7.1488	0.00750142	NM_144832	ENSMUSG00000039294	BC017643	cDNA sequence BC017643 [Source:MGI Symbol;Acc:MGI:2384959]
chr11	121222589	121224984	2396	+	0.893038	2.34752	7.1488	0.00750142	NM_001252548	ENSMUSG00000039294	BC017643	cDNA sequence BC017643 [Source:MGI Symbol;Acc:MGI:2384959]
chr11	121222589	121224907	2319	+	0.894444	2.3261	7.01259	0.00809384	NM_001254735	ENSMUSG00000039294	BC017643	cDNA sequence BC017643 [Source:MGI Symbol;Acc:MGI:2384959]
chr11	121222589	121224830	2242	+	0.923806	2.33885	7.54501	0.00601764	NM_001252549	ENSMUSG00000039294	BC017643	cDNA sequence BC017643 [Source:MGI Symbol;Acc:MGI:2384959]
chr11	121222589	121224930	2342	+	0.929206	2.33576	7.66995	0.00561481	NM_001252550	ENSMUSG00000039294	BC017643	cDNA sequence BC017643 [Source:MGI Symbol;Acc:MGI:2384959]
chr7	27195781	27197528	1748	+	1.0767	2.1053	7.36053	0.00666711	NM_001243888	ENSMUSG00000078786	BC024978	cDNA sequence BC024978 [Source:MGI Symbol;Acc:MGI:3041247]
chr10	86705811	86707675	1865	+	-0.489978	4.881	9.39629	0.00217426	NM_001003939	ENSMUSG00000044937	BC030307	cDNA sequence BC030307 [Source:MGI Symbol;Acc:MGI:2387653]
chr15	34453312	34455687	2376	+	0.71933	3.0108	8.03153	0.00459699	NM_173421	ENSMUSG00000044726	BC030476	cDNA sequence BC030476 [Source:MGI Symbol;Acc:MGI:2447772]
chr1	163954008	163956917	2910	+	1.06319	3.36656	11.2497	0.000796377	NM_201364	ENSMUSG00000041406	BC055324	cDNA sequence BC055324 [Source:MGI Symbol;Acc:MGI:3590554]
chr2	128126038	128130816	4779	+	-0.265823	6.18388	7.77202	0.00530616	NM_009754	ENSMUSG00000027381	Bcl2l11	BCL2-like 11 (apoptosis facilitator) [Source:MGI Symbol;Acc:MGI:1197519]
chr2	128126038	128130906	4869	+	-0.253316	6.22293	7.00153	0.008144	NM_207681	ENSMUSG00000027381	Bcl2l11	BCL2-like 11 (apoptosis facilitator) [Source:MGI Symbol;Acc:MGI:1197519]
chr2	109692436	109696436	4001	+	-0.329353	5.60286	6.9627	0.00832266	NM_001048141	ENSMUSG00000048482	Bdnf	brain derived neurotrophic factor [Source:MGI Symbol;Acc:MGI:88145]
chrX	136213972	136214837	866	+	0.725127	2.95312	8.36335	0.00382864	NM_009052	ENSMUSG00000050071	Bex1	brain expressed gene 1 [Source:MGI Symbol;Acc:MGI:1328321]
chr13	38602706	38604474	1769	+	-0.310681	5.30863	6.95845	0.00834242	NM_139063	ENSMUSG00000038982	Bloc1s5	biogenesis of organelles complex-1, subunit 5, muted [Source:MGI Symbol;Acc:MGI:2178598]
chr2	18677018	18680611	3594	+	1.05841	3.09585	8.13838	0.00433379	NM_007552	ENSMUSG00000026739	Bmi1	Bmi1 polycomb ring finger oncogene [Source:MGI Symbol;Acc:MGI:88174]
chr6	87429002	87430318	1317	+	-0.463889	5.19851	9.71671	0.001826	NM_009756	ENSMUSG00000030046	Bmp10	bone morphogenetic protein 10 [Source:MGI Symbol;Acc:MGI:1338820]
chr5	98854439	98857550	3112	+	-0.406031	4.98925	10.4961	0.00119627	NM_173404	ENSMUSG00000029335	Bmp3	bone morphogenetic protein 3 [Source:MGI Symbol;Acc:MGI:88179]
chr14	66985240	66988476	3237	+	0.904588	2.99547	7.49539	0.00618572	NM_009761	ENSMUSG00000022051	Bnip3l	BCL2/adenovirus E1B interacting protein 3-like [Source:MGI Symbol;Acc:MGI:1332659]
chr14	99046377	99048669	2293	+	-0.431541	5.87187	11.8998	0.000561403	NM_175265	ENSMUSG00000022070	Bora	bora, aurora kinase A activator [Source:MGI Symbol;Acc:MGI:1924994]
chr2	153974945	153976516	1572	+	1.08142	2.08322	7.58991	0.00586959	NM_001080811	ENSMUSG00000078998	Bpifa6	BPI fold containing family A, member 6 [Source:MGI Symbol;Acc:MGI:3647736]
chr2	154257879	154259916	2038	+	0.748853	3.32766	6.93247	0.00846449	NM_175167	ENSMUSG00000067998	Bpifb9a	BPI fold containing family B, member 9A [Source:MGI Symbol;Acc:MGI:3767993]
chr7	113315644	113318206	2563	+	0.75445	3.7909	8.37366	0.00380697	NM_133700	ENSMUSG00000038187	Btbd10	BTB (POZ) domain containing 10 [Source:MGI Symbol;Acc:MGI:1916065]
chr12	102784648	102788953	4306	+	-0.238687	5.99626	7.39876	0.0065269	NM_172806	ENSMUSG00000041702	Btbd7	BTB (POZ) domain containing 7 [Source:MGI Symbol;Acc:MGI:1917858]
chr5	107437997	107439130	1134	+	0.895925	2.73162	9.29952	0.00229214	NM_001255991	ENSMUSG00000070632	Btbd8	BTB (POZ) domain containing 8 [Source:MGI Symbol;Acc:MGI:3646208]
chr14	31641057	31642998	1942	+	-0.423853	5.68842	7.04725	0.00793869	NM_025295	ENSMUSG00000021900	Btd	biotinidase [Source:MGI Symbol;Acc:MGI:1347001]
chr17	34507935	34509554	1620	+	0.98221	2.25587	8.16862	0.00426214	NM_030747	ENSMUSG00000058762	Btnl6	butyrophilin-like 6 [Source:MGI Symbol;Acc:MGI:1932038]
chr9	46283012	46285219	2208	+	-0.379265	5.21922	12.2801	0.000457805	NM_146000	ENSMUSG00000032077	Bud13	BUD13 homolog (yeast) [Source:MGI Symbol;Acc:MGI:2443443]
chr5	145140397	145141101	705	+	0.946811	2.64007	10.4567	0.00122203	NM_001008705	ENSMUSG00000038722	Bud31	BUD31 homolog (yeast) [Source:MGI Symbol;Acc:MGI:2141291]
chr7	27689340	27693949	4610	+	0.799878	3.53672	7.08116	0.00778985	NM_001112731	ENSMUSG00000057093	C030039L03Rik	RIKEN cDNA C030039L03 gene [Source:MGI Symbol;Acc:MGI:2148237]
chr7	27674661	27679250	4590	+	0.835691	3.52555	7.78902	0.00525648	NM_198417	ENSMUSG00000057093	C030039L03Rik	RIKEN cDNA C030039L03 gene [Source:MGI Symbol;Acc:MGI:2148237]
chr6	7845224	7847288	2065	+	0.719216	2.77466	6.89613	0.00863826	NM_052993	ENSMUSG00000042460	C1galt1	core 1 synthase, glycoprotein-N-acetylgalactosamine 3-beta-galactosyltransferase, 1 [Source:MGI Symbol;Acc:MGI:2151071]
chr4	136889802	136890855	1054	+	-0.444492	4.10307	7.55646	0.00597955	NM_007574	ENSMUSG00000036896	C1qc	complement component 1, q subcomponent, C chain [Source:MGI Symbol;Acc:MGI:88225]
chr1	130635921	130637803	1883	+	1.08447	2.88129	15.5337	8.10454e-05	NM_007576	ENSMUSG00000026405	C4bp	complement component 4 binding protein [Source:MGI Symbol;Acc:MGI:88229]
chr2	180258539	180261483	2945	+	0.57355	3.92009	8.18644	0.00422047	NM_145851	ENSMUSG00000038990	Cables2	CDK5 and Abl enzyme substrate 2 [Source:MGI Symbol;Acc:MGI:2182335]	Unknown. Probably involved in G1-S cell cycle transition
chr19	4135423	4136855	1433	+	-0.449806	4.71321	7.41765	0.00645872	NM_144532	ENSMUSG00000024842	Cabp4	calcium binding protein 4 [Source:MGI Symbol;Acc:MGI:1920910]
chr11	4738821	4739519	699	+	-0.49846	4.80784	8.7772	0.00305018	NM_138948	ENSMUSG00000009075	Cabp7	calcium binding protein 7 [Source:MGI Symbol;Acc:MGI:2183437]
chr4	100776679	100781643	4965	+	-0.319272	6.98102	14.4702	0.000142398	NM_198037	ENSMUSG00000028532	Cachd1	cache domain containing 1 [Source:MGI Symbol;Acc:MGI:2444177]
chr7	122671744	122673269	1526	+	-0.376367	4.81513	7.0575	0.00789342	NM_019430	ENSMUSG00000066189	Cacng3	calcium channel, voltage-dependent, gamma subunit 3 [Source:MGI Symbol;Acc:MGI:1859165]
chr7	3336585	3337412	828	+	-0.485319	5.23478	6.99794	0.00816035	NM_133189	ENSMUSG00000069806	Cacng7	calcium channel, voltage-dependent, gamma subunit 7 [Source:MGI Symbol;Acc:MGI:1932374]
chr13	38006052	38008909	2858	+	-0.437251	5.26435	10.9802	0.000920907	NM_027724	ENSMUSG00000044566	Cage1	cancer antigen 1 [Source:MGI Symbol;Acc:MGI:1918463]
chr8	92901395	92902409	1015	+	-0.511842	4.77722	7.73284	0.00542254	NM_027112	ENSMUSG00000078144	Capns2	calpain, small subunit 2 [Source:MGI Symbol;Acc:MGI:1916793]
chr11	93099290	93102625	3336	+	0.984234	3.55416	13.203	0.000279495	NM_028296	ENSMUSG00000056158	Car10	carbonic anhydrase 10 [Source:MGI Symbol;Acc:MGI:1919855]
chr9	66713686	66717401	3716	+	0.728989	4.11235	11.9477	0.000547143	NM_178396	ENSMUSG00000032373	Car12	carbonic anyhydrase 12 [Source:MGI Symbol;Acc:MGI:1923709]
chr8	121916138	121917382	1245	+	-0.486028	5.50541	7.43317	0.00640325	NM_007608	ENSMUSG00000025317	Car5a	carbonic anhydrase 5a, mitochondrial [Source:MGI Symbol;Acc:MGI:101946]
chr8	104540807	104542344	1538	+	0.497462	3.82574	7.53618	0.00604721	NM_053070	ENSMUSG00000031883	Car7	carbonic anhydrase 7 [Source:MGI Symbol;Acc:MGI:103100]
chr8	11514017	11515866	1850	+	-0.317288	5.9999	9.17009	0.00246002	NM_024248	ENSMUSG00000056228	Cars2	cysteinyl-tRNA synthetase 2 (mitochondrial)(putative) [Source:MGI Symbol;Acc:MGI:1919191]
chr2	121867705	121871496	3792	+	0.861141	3.39502	10.4235	0.00124423	NM_001205371	ENSMUSG00000060227	Casc4	cancer susceptibility candidate 4 [Source:MGI Symbol;Acc:MGI:2443129]
chr2	121866970	121871171	4202	+	0.866584	3.38253	10.365	0.00128428	NM_001205369	ENSMUSG00000060227	Casc4	cancer susceptibility candidate 4 [Source:MGI Symbol;Acc:MGI:2443129]
chr2	121866970	121871072	4103	+	0.866584	3.38253	10.365	0.00128428	NM_177054	ENSMUSG00000060227	Casc4	cancer susceptibility candidate 4 [Source:MGI Symbol;Acc:MGI:2443129]
chr2	121866970	121870904	3935	+	0.922895	2.88139	9.92523	0.00163028	NM_199038	ENSMUSG00000060227	Casc4	cancer susceptibility candidate 4 [Source:MGI Symbol;Acc:MGI:2443129]
chr2	121866970	121871003	4034	+	0.922895	2.88139	9.92523	0.00163028	NM_001205370	ENSMUSG00000060227	Casc4	cancer susceptibility candidate 4 [Source:MGI Symbol;Acc:MGI:2443129]
chr3	129901425	129902879	1455	+	-0.555922	5.46435	13.0688	0.000300261	NM_009811	ENSMUSG00000027997	Casp6	caspase 6 [Source:MGI Symbol;Acc:MGI:1312921]
chr11	119023029	119026768	3740	+	-0.47725	6.10961	8.41965	0.00371187	NM_007623	ENSMUSG00000025577	Cbx2	chromobox 2 [Source:MGI Symbol;Acc:MGI:88289]
chr15	79915807	79918699	2893	+	-0.379042	6.07114	7.3997	0.00652349	NM_144811	ENSMUSG00000053411	Cbx7	chromobox 7 [Source:MGI Symbol;Acc:MGI:1196439]
chr5	43662379	43667827	5449	+	0.330199	6.15743	8.74871	0.00309821	NM_172274	ENSMUSG00000039765	Cc2d2a	coiled-coil and C2 domain containing 2A [Source:MGI Symbol;Acc:MGI:1924487]
chr18	74283100	74284975	1876	+	0.52897	3.89017	8.33188	0.00389553	NM_028948	ENSMUSG00000035394	Ccdc11	coiled-coil domain containing 11 [Source:MGI Symbol;Acc:MGI:1921703]
chr1	34436670	34438374	1705	+	1.26835	2.52765	11.08	0.000872632	NM_027159	ENSMUSG00000042111	Ccdc115	coiled-coil domain containing 115 [Source:MGI Symbol;Acc:MGI:1916918]
chr6	49319353	49321623	2271	+	-0.542837	4.964	13.5984	0.000226382	NM_175098	ENSMUSG00000050786	Ccdc126	coiled-coil domain containing 126 [Source:MGI Symbol;Acc:MGI:1889376]
chr10	4509872	4512022	2151	+	0.960636	3.2597	8.36353	0.00382827	NM_001195672	ENSMUSG00000019767	Ccdc170	coiled-coil domain containing 170 [Source:MGI Symbol;Acc:MGI:2685067]
chr6	91878053	91879809	1757	+	1.20321	3.23581	14.1999	0.00016438	NM_172730	ENSMUSG00000034083	Ccdc174	coiled-coil domain containing 174 [Source:MGI Symbol;Acc:MGI:2444652]
chr5	108132914	108137570	4657	+	0.709494	4.34506	10.5656	0.00115213	NM_028481	ENSMUSG00000056531	Ccdc18	coiled-coil domain containing 18 [Source:MGI Symbol;Acc:MGI:1922974]
chr16	27388956	27395957	7002	+	1.00267	3.67783	7.11744	0.00763377	NM_026202	ENSMUSG00000038127	Ccdc50	coiled-coil domain containing 50 [Source:MGI Symbol;Acc:MGI:1914751]
chr16	27388956	27395912	6957	+	1.02151	3.67101	7.41557	0.0064662	NM_001025615	ENSMUSG00000038127	Ccdc50	coiled-coil domain containing 50 [Source:MGI Symbol;Acc:MGI:1914751]
chr11	55049738	55051156	1419	+	1.08566	2.76322	9.11938	0.00252915	NM_177471	ENSMUSG00000049588	Ccdc69	coiled-coil domain containing 69 [Source:MGI Symbol;Acc:MGI:1196234]
chr11	29374172	29383033	8862	+	0.489467	5.18841	8.21138	0.00416284	NM_176841	ENSMUSG00000032740	Ccdc88a	coiled coil domain containing 88A [Source:MGI Symbol;Acc:MGI:1925177]
chr13	119623819	119627557	3739	+	0.476703	4.00708	7.56164	0.00596238	NM_020279	ENSMUSG00000074715	Ccl28	chemokine (C-C motif) ligand 28 [Source:MGI Symbol;Acc:MGI:1861731]
chr3	36564865	36567675	2811	+	0.915502	2.35929	6.98074	0.00823914	NM_009828	ENSMUSG00000027715	Ccna2	cyclin A2 [Source:MGI Symbol;Acc:MGI:108069]
chr19	40831279	40835095	3817	+	-0.352428	6.28866	7.80211	0.00521853	NM_172839	ENSMUSG00000025010	Ccnj	cyclin J [Source:MGI Symbol;Acc:MGI:2443297]
chr11	99144199	99146173	1975	+	-0.521914	5.78699	11.023	0.000899876	NM_007719	ENSMUSG00000037944	Ccr7	chemokine (C-C motif) receptor 7 [Source:MGI Symbol;Acc:MGI:103011]
chr7	126408448	126410883	2436	+	0.729888	3.18452	8.34862	0.0038598	NM_009844	ENSMUSG00000030724	Cd19	CD19 antigen [Source:MGI Symbol;Acc:MGI:88319]
chr8	4102793	4103901	1109	+	0.922783	2.47621	8.86383	0.00290876	NM_026956	ENSMUSG00000051906	Cd209f	CD209f antigen [Source:MGI Symbol;Acc:MGI:1916392]
chr6	124864693	124867787	3095	+	0.532363	3.87376	8.20152	0.00418554	NM_013488	ENSMUSG00000023274	Cd4	CD4 antigen [Source:MGI Symbol;Acc:MGI:88335]
chr16	49855654	49857567	1914	+	0.500346	4.619	8.98295	0.0027251	NM_010581	ENSMUSG00000055447	Cd47	CD47 antigen (Rh-related antigen, integrin-associated signal transducer) [Source:MGI Symbol;Acc:MGI:96617]
chr1	130439030	130441555	2526	+	1.17758	2.46074	11.664	0.000637228	NM_010016	ENSMUSG00000026399	Cd55	CD55 antigen [Source:MGI Symbol;Acc:MGI:104850]
chr19	10789339	10792255	2917	+	-0.305922	5.6621	6.98836	0.00820415	NM_001037801	ENSMUSG00000024670	Cd6	CD6 antigen [Source:MGI Symbol;Acc:MGI:103566]
chr16	36603869	36606407	2539	+	0.547621	3.90608	8.75542	0.00308684	NM_019388	ENSMUSG00000022901	Cd86	CD86 antigen [Source:MGI Symbol;Acc:MGI:101773]
chr16	46035657	46037837	2181	+	0.777709	3.58631	8.51037	0.00353128	NM_032465	ENSMUSG00000022657	Cd96	CD96 antigen [Source:MGI Symbol;Acc:MGI:1934368]
chr8	83723251	83726221	2971	+	0.492455	4.04738	6.90133	0.00861317	NM_001163029	ENSMUSG00000002885	Cd97	CD97 antigen [Source:MGI Symbol;Acc:MGI:1347095]
chr2	120716154	120722537	6384	+	0.694059	4.99873	11.0563	0.000883841	NM_026891	ENSMUSG00000027284	Cdan1	congenital dyserythropoietic anemia, type I (human) [Source:MGI Symbol;Acc:MGI:1916218]
chr1	143607499	143610176	2678	+	1.30719	2.96837	11.4309	0.000722336	NM_145991	ENSMUSG00000026361	Cdc73	cell division cycle 73, Paf1/RNA polymerase II complex component [Source:MGI Symbol;Acc:MGI:2384876]
chr12	112820235	112822653	2419	+	0.766271	3.41222	9.69944	0.00184324	NM_028023	ENSMUSG00000047832	Cdca4	cell division cycle associated 4 [Source:MGI Symbol;Acc:MGI:1919213]
chr15	13034200	13036831	2632	+	-0.246954	6.33912	7.25955	0.00705251	NM_007666	ENSMUSG00000039385	Cdh6	cadherin 6 [Source:MGI Symbol;Acc:MGI:107435]
chr2	32705782	32709170	3389	+	-0.413931	5.89404	8.72971	0.00313066	NM_130860	ENSMUSG00000009555	Cdk9	cyclin-dependent kinase 9 (CDC2-related kinase) [Source:MGI Symbol;Acc:MGI:1328368]	Proliferation
chr11	51967631	51969494	1864	+	1.25553	2.9044	11.2047	0.000815889	NM_029976	ENSMUSG00000020392	Cdkn2aipnl	CDKN2A interacting protein N-terminal like [Source:MGI Symbol;Acc:MGI:1261797]	No known function
chr9	103353102	103357133	4032	+	0.659329	3.02378	6.9728	0.00827577	NM_001134426	ENSMUSG00000032803	Cdv3	carnitine deficiency-associated gene expressed in ventricle 3 [Source:MGI Symbol;Acc:MGI:2448759]
chr6	120488939	120493807	4869	+	0.679649	3.49916	8.80368	0.00300624	NM_033567	ENSMUSG00000094626	Cecr6	cat eye syndrome chromosome region, candidate 6 [Source:MGI Symbol;Acc:MGI:2136977]
chr15	100674422	100675527	1106	+	0.6441	3.69669	10.393	0.00126497	NM_033612	ENSMUSG00000023031	Cela1	chymotrypsin-like elastase family, member 1 [Source:MGI Symbol;Acc:MGI:95314]
chr2	125563088	125568855	5768	+	-0.208358	6.85606	8.00726	0.00465901	NM_001081091	ENSMUSG00000068394	Cep152	centrosomal protein 152 [Source:MGI Symbol;Acc:MGI:2139083]
chr9	13807788	13810316	2529	+	0.937098	3.48198	9.26561	0.00233497	NM_026665	ENSMUSG00000031922	Cep57	centrosomal protein 57 [Source:MGI Symbol;Acc:MGI:1915551]
chr16	55924361	55925350	990	+	0.897868	3.18611	9.07842	0.00258644	NM_001159365	ENSMUSG00000022604	Cep97	centrosomal protein 97 [Source:MGI Symbol;Acc:MGI:1921451]
chr16	55924361	55925179	819	+	0.903151	3.16757	9.22064	0.00239302	NM_001159366	ENSMUSG00000022604	Cep97	centrosomal protein 97 [Source:MGI Symbol;Acc:MGI:1921451]
chr16	55924361	55925468	1108	+	0.926295	3.19996	9.9669	0.0015938	NM_001159364	ENSMUSG00000022604	Cep97	centrosomal protein 97 [Source:MGI Symbol;Acc:MGI:1921451]
chr8	93302369	93304657	2289	+	0.886849	2.63882	7.81109	0.00519267	NM_021456	ENSMUSG00000057074	Ces1g	carboxylesterase 1G [Source:MGI Symbol;Acc:MGI:88378]
chr8	105000853	105002529	1677	+	1.10013	2.57812	13.1446	0.000288349	NM_001272045	ENSMUSG00000091813	Ces2h	carboxylesterase 2H [Source:MGI Symbol;Acc:MGI:3648740]
chr3	37308627	37309685	1059	+	1.47395	2.03569	13.9557	0.000187165	NM_145825	ENSMUSG00000045031	Cetn4	centrin 4 [Source:MGI Symbol;Acc:MGI:2677454]
chr1	175682238	175688353	6116	+	0.839305	4.00961	9.82377	0.00172271	NM_021350	ENSMUSG00000078185	Chml	choroideremia-like [Source:MGI Symbol;Acc:MGI:101913]
chr14	69716979	69719684	2706	+	0.629106	3.83438	7.30196	0.00688796	NM_134078	ENSMUSG00000034190	Chmp7	charged multivesicular body protein 7 [Source:MGI Symbol;Acc:MGI:1913922]
chr15	73090412	73091262	851	+	0.714004	3.17879	9.57182	0.00197587	NM_053068	ENSMUSG00000068391	Chrac1	chromatin accessibility complex 1 [Source:MGI Symbol;Acc:MGI:2135796]
chr5	65967124	65969126	2003	+	-0.340923	5.96145	6.99889	0.00815602	NM_001081104	ENSMUSG00000029205	Chrna9	cholinergic receptor, nicotinic, alpha polypeptide 9 [Source:MGI Symbol;Acc:MGI:1202403]
chr18	59175340	59179221	3882	+	-0.489935	5.49179	18.198	1.99089e-05	NM_001081328	ENSMUSG00000058152	Chsy3	chondroitin sulfate synthase 3 [Source:MGI Symbol;Acc:MGI:1926173]
chr19	44073334	44076816	3483	+	0.475249	4.29617	7.43147	0.00640929	NM_001162410	ENSMUSG00000025199	Chuk	conserved helix-loop-helix ubiquitous kinase [Source:MGI Symbol;Acc:MGI:99484]
chr19	44073334	44076833	3500	+	0.475249	4.29617	7.43147	0.00640929	NM_007700	ENSMUSG00000025199	Chuk	conserved helix-loop-helix ubiquitous kinase [Source:MGI Symbol;Acc:MGI:99484]
chr7	80227156	80228185	1030	+	1.10878	2.2133	10.1059	0.00147792	NM_011870	ENSMUSG00000030538	Cib1	calcium and integrin binding 1 (calmyrin) [Source:MGI Symbol;Acc:MGI:1344418]
chr12	110872610	110874788	2179	+	0.544762	4.02507	9.39919	0.00217081	NM_027223	ENSMUSG00000021276	Cinp	cyclin-dependent kinase 2 interacting protein [Source:MGI Symbol;Acc:MGI:1914486]
chr12	110872610	110874638	2029	+	0.627861	3.57802	8.97368	0.00273896	NM_026048	ENSMUSG00000021276	Cinp	cyclin-dependent kinase 2 interacting protein [Source:MGI Symbol;Acc:MGI:1914486]
chr10	71330494	71331458	965	+	-0.520288	5.37417	9.1523	0.00248406	NM_134007	ENSMUSG00000037710	Cisd1	CDGSH iron sulfur domain 1 [Source:MGI Symbol;Acc:MGI:1261855]
chr2	121358641	121360229	1589	+	0.693148	3.4279	9.83348	0.00171364	NM_009897	ENSMUSG00000000308	Ckmt1	creatine kinase, mitochondrial 1, ubiquitous [Source:MGI Symbol;Acc:MGI:99441]
chr6	42286685	42290229	3545	+	0.87148	4.02503	11.1198	0.000854115	NM_013491	ENSMUSG00000029862	Clcn1	chloride channel 1 [Source:MGI Symbol;Acc:MGI:88417]
chr8	47822143	47822805	663	+	0.837657	2.51775	7.4876	0.00621253	NM_001111318	ENSMUSG00000061974	Cldn24	claudin 24 [Source:MGI Symbol;Acc:MGI:3712484]
chr16	58727910	58730103	2194	+	-0.54984	5.45849	11.6805	0.000631572	NM_171826	ENSMUSG00000022744	Cldn25	claudin 25 [Source:MGI Symbol;Acc:MGI:2447860]
chr16	58727910	58730096	2187	+	-0.54984	5.45849	11.6805	0.000631572	NM_001252450	ENSMUSG00000022744	Cldn25	claudin 25 [Source:MGI Symbol;Acc:MGI:2447860]
chr17	23679365	23680870	1506	+	0.936254	2.61591	9.41402	0.00215332	NM_018777	ENSMUSG00000023906	Cldn6	claudin 6 [Source:MGI Symbol;Acc:MGI:1859284]
chr16	88560826	88563183	2358	+	-0.484328	4.78508	9.56163	0.00198686	NM_018778	ENSMUSG00000050520	Cldn8	claudin 8 [Source:MGI Symbol;Acc:MGI:1859286]
chr6	129180615	129181828	1214	+	1.42539	1.76774	9.7087	0.00183398	NM_053109	ENSMUSG00000030157	Clec2d	C-type lectin domain family 2, member d [Source:MGI Symbol;Acc:MGI:2135589]
chr5	123577794	123583670	5877	+	-0.289744	7.32864	9.52861	0.00202293	NM_019765	ENSMUSG00000049550	Clip1	CAP-GLY domain containing linker protein 1 [Source:MGI Symbol;Acc:MGI:1928401]
chr3	89164805	89167111	2307	+	-0.441558	6.17721	8.62522	0.0033154	NM_001163432	ENSMUSG00000068917	Clk2	CDC-like kinase 2 [Source:MGI Symbol;Acc:MGI:1098669]	Affect PGC1a / interact with AKT / regulates alternative splicing
chr3	89164805	89167114	2310	+	-0.441558	6.17721	8.62522	0.0033154	NM_007712	ENSMUSG00000068917	Clk2	CDC-like kinase 2 [Source:MGI Symbol;Acc:MGI:1098669]
chr11	51263171	51265062	1892	+	0.495107	4.68567	7.41575	0.00646554	NM_007714	ENSMUSG00000020385	Clk4	CDC like kinase 4 [Source:MGI Symbol;Acc:MGI:1098551]
chr7	97696657	97700051	3395	+	0.643497	4.43114	8.49756	0.00355623	NM_023671	ENSMUSG00000025439	Clns1a	chloride channel, nucleotide-sensitive, 1A [Source:MGI Symbol;Acc:MGI:109638]
chr2	84723122	84724951	1830	+	-0.349053	4.89501	6.98779	0.00820678	NM_133840	ENSMUSG00000027079	Clp1	CLP1, cleavage and polyadenylation factor I subunit [Source:MGI Symbol;Acc:MGI:2138968]
chr13	73604002	73606379	2378	+	0.479048	4.17204	7.17877	0.00737713	NM_146047	ENSMUSG00000021610	Clptm1l	CLPTM1-like [Source:MGI Symbol;Acc:MGI:2442892]
chr5	45453751	45454694	944	+	-0.518243	4.7178	10.4651	0.00121652	NM_001163317	ENSMUSG00000049530	Clrn2	clarin 2 [Source:MGI Symbol;Acc:MGI:3646230]
chr4	126556980	126561961	4982	+	-0.214233	7.04642	6.89108	0.00866269	NM_175554	ENSMUSG00000042489	Clspn	claspin [Source:MGI Symbol;Acc:MGI:2445153]
chr11	86694653	86700796	6144	+	0.772563	5.21022	10.0166	0.00155139	NM_001003908	ENSMUSG00000047126	Cltc	clathrin, heavy polypeptide (Hc) [Source:MGI Symbol;Acc:MGI:2388633]
chr6	85910154	85911164	1011	+	1.40319	2.61544	22.7982	1.79938e-06	NM_023160	ENSMUSG00000057103	Cml1	camello-like 1 [Source:MGI Symbol;Acc:MGI:1913366]
chr8	104293542	104294671	1130	+	-0.419415	4.30929	7.84174	0.00510534	NM_181990	ENSMUSG00000031876	Cmtm1	CKLF-like MARVEL transmembrane domain containing 1 [Source:MGI Symbol;Acc:MGI:2447159]
chr8	95290593	95292104	1512	+	1.25686	2.28362	12.9912	0.000312951	NM_145601	ENSMUSG00000031789	Cngb1	cyclic nucleotide gated channel beta 1 [Source:MGI Symbol;Acc:MGI:2664102]
chr9	22099253	22101239	1987	+	0.796568	3.8871	12.4293	0.000422654	NM_009922	ENSMUSG00000001349	Cnn1	calponin 1 [Source:MGI Symbol;Acc:MGI:104979]
chr6	35022065	35025387	3323	+	0.458496	4.79959	8.16599	0.00426833	NM_001164414	ENSMUSG00000038784	Cnot4	CCR4-NOT transcription complex, subunit 4 [Source:MGI Symbol;Acc:MGI:1859026]
chr6	35022065	35025378	3314	+	0.458496	4.79959	8.16599	0.00426833	NM_001164412	ENSMUSG00000038784	Cnot4	CCR4-NOT transcription complex, subunit 4 [Source:MGI Symbol;Acc:MGI:1859026]
chr6	35022065	35025591	3527	+	0.471809	4.86155	9.12705	0.00251858	NM_001164413	ENSMUSG00000038784	Cnot4	CCR4-NOT transcription complex, subunit 4 [Source:MGI Symbol;Acc:MGI:1859026]
chr6	35042707	35048313	5607	+	0.6802	4.61724	12.8872	0.000330841	NM_016877	ENSMUSG00000038784	Cnot4	CCR4-NOT transcription complex, subunit 4 [Source:MGI Symbol;Acc:MGI:1859026]
chr6	35042707	35048304	5598	+	0.6802	4.61724	12.8872	0.000330841	NM_001164411	ENSMUSG00000038784	Cnot4	CCR4-NOT transcription complex, subunit 4 [Source:MGI Symbol;Acc:MGI:1859026]
chr8	40492538	40495043	2506	+	0.900594	3.04419	7.19667	0.00730391	NM_001271543	ENSMUSG00000031601	Cnot7	CCR4-NOT transcription complex, subunit 7 [Source:MGI Symbol;Acc:MGI:1298230]
chr8	40492538	40495154	2617	+	0.926105	3.05728	7.46162	0.00630284	NM_011135	ENSMUSG00000031601	Cnot7	CCR4-NOT transcription complex, subunit 7 [Source:MGI Symbol;Acc:MGI:1298230]
chr8	40492538	40495083	2546	+	0.945018	3.0788	8.02906	0.00460326	NM_001271542	ENSMUSG00000031601	Cnot7	CCR4-NOT transcription complex, subunit 7 [Source:MGI Symbol;Acc:MGI:1298230]
chr17	46735713	46737610	1898	+	0.674979	3.87532	9.17437	0.00245428	NM_028065	ENSMUSG00000023973	Cnpy3	canopy 3 homolog (zebrafish) [Source:MGI Symbol;Acc:MGI:1919279]
chr4	84884309	84886737	2429	+	0.778735	3.41956	9.24897	0.00235628	NM_177385	ENSMUSG00000038070	Cntln	centlein, centrosomal protein [Source:MGI Symbol;Acc:MGI:2443104]
chr15	92128128	92133847	5720	+	-0.21635	6.76758	9.06192	0.00260988	NM_007727	ENSMUSG00000055022	Cntn1	contactin 1 [Source:MGI Symbol;Acc:MGI:105980]
chr15	92051165	92056835	5671	+	-0.212771	6.69492	8.36472	0.00382576	NM_001159648	ENSMUSG00000055022	Cntn1	contactin 1 [Source:MGI Symbol;Acc:MGI:105980]
chr15	92161357	92167173	5817	+	-0.212329	6.7098	8.73643	0.00311915	NM_001159647	ENSMUSG00000055022	Cntn1	contactin 1 [Source:MGI Symbol;Acc:MGI:105980]
chr19	47646341	47651768	5428	+	0.284439	6.61847	10.3908	0.00126642	NM_007732	ENSMUSG00000025064	Col17a1	collagen, type XVII, alpha 1 [Source:MGI Symbol;Acc:MGI:88450]
chr6	4505697	4510839	5143	+	0.51558	5.48701	11.5117	0.00069158	NM_007743	ENSMUSG00000029661	Col1a2	collagen, type I, alpha 2 [Source:MGI Symbol;Acc:MGI:88468]
chr2	180986535	180990723	4189	+	0.835502	3.5147	10.2672	0.00135418	NM_028518	ENSMUSG00000016356	Col20a1	collagen, type XX, alpha 1 [Source:MGI Symbol;Acc:MGI:1920618]
chr9	105774112	105778065	3954	+	-0.530295	6.7189	17.9151	2.3098e-05	NM_172927	ENSMUSG00000043719	Col6a6	collagen, type VI, alpha 6 [Source:MGI Symbol;Acc:MGI:2444259]
chr9	105689417	105696514	7098	+	-0.260759	7.28603	8.3978	0.00375675	NM_001102607	ENSMUSG00000043719	Col6a6	collagen, type VI, alpha 6 [Source:MGI Symbol;Acc:MGI:2444259]
chr1	24177610	24181497	3888	+	0.743251	4.15356	11.7327	0.000614112	NM_007740	ENSMUSG00000026147	Col9a1	collagen, type IX, alpha 1 [Source:MGI Symbol;Acc:MGI:88465]
chr4	121039566	121042311	2746	+	0.687146	4.04704	11.1717	0.000830532	NM_007741	ENSMUSG00000028626	Col9a2	collagen, type IX, alpha 2 [Source:MGI Symbol;Acc:MGI:88466]
chr6	30747554	30751569	4016	+	0.601791	4.43362	8.19119	0.00420943	NM_017478	ENSMUSG00000025607	Copg2	coatomer protein complex, subunit gamma 2 [Source:MGI Symbol;Acc:MGI:1858683]
chr1	90603425	90605267	1843	+	0.718876	4.25211	12.6573	0.000374107	NM_133805	ENSMUSG00000034432	Cops8	COP9 (constitutive photomorphogenic) homolog, subunit 8 (Arabidopsis thaliana) [Source:MGI Symbol;Acc:MGI:1915363]
chr1	55052770	55054352	1583	+	0.893058	3.47269	17.0413	3.65761e-05	NM_026424	ENSMUSG00000025981	Coq10b	coenzyme Q10 homolog B (S. cerevisiae) [Source:MGI Symbol;Acc:MGI:1915126]
chr1	55052770	55054502	1733	+	0.928671	3.70778	17.7202	2.55891e-05	NM_001039710	ENSMUSG00000025981	Coq10b	coenzyme Q10 homolog B (S. cerevisiae) [Source:MGI Symbol;Acc:MGI:1915126]
chr4	21879675	21882287	2613	+	0.896091	3.44841	7.88398	0.00498745	NM_172687	ENSMUSG00000028247	Coq3	coenzyme Q3 homolog, methyltransferase (yeast) [Source:MGI Symbol;Acc:MGI:101813]
chr11	77463913	77465328	1416	+	-0.347606	5.56827	8.51208	0.00352797	NM_139130	ENSMUSG00000020836	Coro6	coronin 6 [Source:MGI Symbol;Acc:MGI:2183448]
chr11	77463913	77465208	1296	+	-0.337165	5.53526	8.52363	0.00350564	NM_139129	ENSMUSG00000020836	Coro6	coronin 6 [Source:MGI Symbol;Acc:MGI:2183448]
chr11	77463913	77465328	1416	+	-0.324569	5.55169	8.37179	0.00381091	NM_139128	ENSMUSG00000020836	Coro6	coronin 6 [Source:MGI Symbol;Acc:MGI:2183448]
chr16	4626884	4630371	3488	+	0.564341	5.01822	8.13676	0.00433767	NM_030205	ENSMUSG00000039637	Coro7	coronin 7 [Source:MGI Symbol;Acc:MGI:1926135]
chr8	119809214	119810852	1639	+	-0.408839	4.70451	7.64696	0.00568681	NM_028071	ENSMUSG00000031827	Cotl1	coactosin-like 1 (Dictyostelium) [Source:MGI Symbol;Acc:MGI:1919292]
chr15	99725618	99726340	723	+	-0.570612	3.59436	8.19483	0.00420099	NM_183256	ENSMUSG00000023020	Cox14	cytochrome c oxidase assembly protein 14 [Source:MGI Symbol;Acc:MGI:1913629]
chr12	81470704	81472700	1997	+	1.40155	2.20613	16.4518	4.99041e-05	NM_025461	ENSMUSG00000091803	Cox16	cytochrome c oxidase assembly protein 16 [Source:MGI Symbol;Acc:MGI:1913522]
chr3	19957054	19961614	4561	+	1.46749	3.24379	18.087	2.11038e-05	NM_001276248	ENSMUSG00000003617	Cp	ceruloplasmin [Source:MGI Symbol;Acc:MGI:88476]
chr3	19957054	19960942	3889	+	1.47932	3.00241	20.6981	5.37701e-06	NM_007752	ENSMUSG00000003617	Cp	ceruloplasmin [Source:MGI Symbol;Acc:MGI:88476]
chr3	19957054	19961765	4712	+	1.4834	3.16644	19.478	1.01764e-05	NM_001276250	ENSMUSG00000003617	Cp	ceruloplasmin [Source:MGI Symbol;Acc:MGI:88476]
chr3	20215616	20217068	1453	+	1.02441	2.27029	7.63009	0.00574023	NM_007753	ENSMUSG00000001865	Cpa3	carboxypeptidase A3, mast cell [Source:MGI Symbol;Acc:MGI:88479]
chr11	76777208	76786359	9152	+	0.592405	5.2816	9.00382	0.00269416	NM_007754	ENSMUSG00000020841	Cpd	carboxypeptidase D [Source:MGI Symbol;Acc:MGI:107265]
chr11	31870940	31878580	7641	+	0.555239	4.17327	8.07445	0.00448937	NM_026252	ENSMUSG00000020300	Cpeb4	cytoplasmic polyadenylation element binding protein 4 [Source:MGI Symbol;Acc:MGI:1914829]
chr10	117629500	117634694	5195	+	-0.233706	6.35146	11.022	0.000900381	NM_027468	ENSMUSG00000020183	Cpm	carboxypeptidase M [Source:MGI Symbol;Acc:MGI:1917824]
chr16	30256379	30260960	4582	+	0.683057	3.9857	13.2972	0.000265809	NM_027904	ENSMUSG00000023176	Cpn2	carboxypeptidase N, polypeptide 2 [Source:MGI Symbol;Acc:MGI:1919006]
chr15	90643323	90644022	700	+	-0.417155	4.68984	7.28164	0.0069663	NM_001033851	ENSMUSG00000052560	Cpne8	copine VIII [Source:MGI Symbol;Acc:MGI:1914121]
chr1	195103788	195105449	1662	+	0.972194	2.6368	9.07624	0.00258952	NM_013499	ENSMUSG00000016481	Cr1l	complement component (3b/4b) receptor 1-like [Source:MGI Symbol;Acc:MGI:88513]
chr1	64532804	64541182	8379	+	0.570864	4.17541	8.60626	0.00335009	NM_133828	ENSMUSG00000025958	Creb1	cAMP responsive element binding protein 1 [Source:MGI Symbol;Acc:MGI:88494]
chr1	64532804	64541060	8257	+	0.591569	4.16254	9.08325	0.00257962	NM_001037726	ENSMUSG00000025958	Creb1	cAMP responsive element binding protein 1 [Source:MGI Symbol;Acc:MGI:88494]
chr1	64532804	64541224	8421	+	0.62686	4.22608	9.29841	0.00229352	NM_009952	ENSMUSG00000025958	Creb1	cAMP responsive element binding protein 1 [Source:MGI Symbol;Acc:MGI:88494]
chr17	26715650	26723102	7453	+	0.736532	4.35244	11.7477	0.000609187	NM_029870	ENSMUSG00000048249	Crebrf	CREB3 regulatory factor [Source:MGI Symbol;Acc:MGI:1924378]
chr18	3266354	3268740	2387	+	1.01277	2.72743	7.37343	0.00661947	NM_001110850	ENSMUSG00000063889	Crem	cAMP responsive element modulator [Source:MGI Symbol;Acc:MGI:88495]
chr18	3266354	3268965	2612	+	1.01335	2.8366	7.4928	0.00619462	NM_001271505	ENSMUSG00000063889	Crem	cAMP responsive element modulator [Source:MGI Symbol;Acc:MGI:88495]
chr18	3266354	3269076	2723	+	1.05788	2.99913	7.47108	0.00626978	NM_001271506	ENSMUSG00000063889	Crem	cAMP responsive element modulator [Source:MGI Symbol;Acc:MGI:88495]
chr18	3266354	3268776	2423	+	1.05856	2.74552	7.6002	0.00583618	NM_013498	ENSMUSG00000063889	Crem	cAMP responsive element modulator [Source:MGI Symbol;Acc:MGI:88495]
chr18	3266354	3268887	2534	+	1.09057	2.91734	7.52501	0.00608483	NM_001271504	ENSMUSG00000063889	Crem	cAMP responsive element modulator [Source:MGI Symbol;Acc:MGI:88495]
chr18	3266354	3268923	2570	+	1.13044	2.93344	7.76527	0.00532604	NM_001110856	ENSMUSG00000063889	Crem	cAMP responsive element modulator [Source:MGI Symbol;Acc:MGI:88495]
chr18	3266354	3268379	2026	+	1.15077	2.60643	9.97621	0.00158576	NM_001110857	ENSMUSG00000063889	Crem	cAMP responsive element modulator [Source:MGI Symbol;Acc:MGI:88495]
chr18	3266354	3268715	2362	+	1.16724	2.89877	9.32716	0.00225782	NM_001110859	ENSMUSG00000063889	Crem	cAMP responsive element modulator [Source:MGI Symbol;Acc:MGI:88495]
chr18	3266354	3268606	2253	+	1.19097	2.86916	9.05601	0.00261833	NM_001110853	ENSMUSG00000063889	Crem	cAMP responsive element modulator [Source:MGI Symbol;Acc:MGI:88495]
chr17	46428942	46429955	1014	+	1.80576	1.72765	13.4288	0.000247796	NM_053250	ENSMUSG00000023968	Crip3	cysteine-rich protein 3 [Source:MGI Symbol;Acc:MGI:2152434]
chr17	46428942	46429896	955	+	1.80576	1.72765	13.4288	0.000247796	NM_181664	ENSMUSG00000023968	Crip3	cysteine-rich protein 3 [Source:MGI Symbol;Acc:MGI:2152434]
chr16	22805203	22805910	708	+	-0.483776	5.20487	7.90709	0.00492415	NM_009967	ENSMUSG00000033501	Crygs	crystallin, gamma S [Source:MGI Symbol;Acc:MGI:1298216]
chr15	78325990	78330754	4765	+	0.934677	3.43496	14.4487	0.000144028	NM_007780	ENSMUSG00000071713	Csf2rb	colony stimulating factor 2 receptor, beta, low-affinity (granulocyte-macrophage) [Source:MGI Symbol;Acc:MGI:1339759]
chr11	98701313	98702675	1363	+	0.906922	3.07787	12.4825	0.000410787	NM_009971	ENSMUSG00000038067	Csf3	colony stimulating factor 3 (granulocyte) [Source:MGI Symbol;Acc:MGI:1339751]
chr2	65845767	65856438	10672	+	-0.248834	6.84782	9.16144	0.00247168	NM_153409	ENSMUSG00000044647	Csrnp3	cysteine-serine-rich nuclear protein 3 [Source:MGI Symbol;Acc:MGI:1925021]
chr2	65845767	65856276	10510	+	-0.237322	6.75562	8.02705	0.00460839	NM_178634	ENSMUSG00000044647	Csrnp3	cysteine-serine-rich nuclear protein 3 [Source:MGI Symbol;Acc:MGI:1925021]
chr2	144369035	144372782	3748	+	-0.301048	6.85662	7.36794	0.0066397	NM_181417	ENSMUSG00000027425	Csrp2bp	cysteine and glycine-rich protein 2 binding protein [Source:MGI Symbol;Acc:MGI:1917264]
chr19	5344705	5348655	3951	+	1.45699	2.57159	21.522	3.49786e-06	NM_028623	ENSMUSG00000024846	Cst6	cystatin E/M [Source:MGI Symbol;Acc:MGI:1920970]
chr2	150570415	150571400	986	+	1.40059	2.08665	14.2648	0.000158807	NM_009977	ENSMUSG00000068129	Cst7	cystatin F (leukocystatin) [Source:MGI Symbol;Acc:MGI:1298217]
chr19	31082841	31086592	3752	+	0.567029	3.63845	6.8798	0.00871755	NM_031249	ENSMUSG00000053536	Cstf2t	cleavage stimulation factor, 3' pre-RNA subunit 2, tau [Source:MGI Symbol;Acc:MGI:1932622]
chr9	118926536	118931162	4627	+	-0.283319	6.93831	8.32892	0.00390188	NM_133710	ENSMUSG00000047409	Ctdspl	CTD (carboxy-terminal domain, RNA polymerase II, polypeptide A) small phosphatase-like [Source:MGI Symbol;Acc:MGI:1916524]
chr3	157894248	157896048	1801	+	0.889015	3.14929	10.2111	0.00139597	NM_145953	ENSMUSG00000028179	Cth	cystathionase (cystathionine gamma-lyase) [Source:MGI Symbol;Acc:MGI:1339968]
chr6	76881637	76885622	3986	+	-0.375262	5.52801	11.1316	0.000848714	NM_145732	ENSMUSG00000063063	Ctnna2	catenin (cadherin associated protein), alpha 2 [Source:MGI Symbol;Acc:MGI:88275]
chr6	76881637	76885664	4028	+	-0.361574	5.53483	10.6046	0.00112804	NM_009819	ENSMUSG00000063063	Ctnna2	catenin (cadherin associated protein), alpha 2 [Source:MGI Symbol;Acc:MGI:88275]
chr6	76881637	76885766	4130	+	-0.360704	5.53891	10.3718	0.00127956	NM_001109764	ENSMUSG00000063063	Ctnna2	catenin (cadherin associated protein), alpha 2 [Source:MGI Symbol;Acc:MGI:88275]
chr1	131638314	131640433	2120	+	0.684019	3.75523	9.8276	0.00171912	NM_007799	ENSMUSG00000004552	Ctse	cathepsin E [Source:MGI Symbol;Acc:MGI:107361]
chr13	61159215	61160549	1335	+	1.30406	1.84366	9.54773	0.00200197	NM_020284	ENSMUSG00000055679	Ctsr	cathepsin R [Source:MGI Symbol;Acc:MGI:1861723]
chr19	5465240	5466471	1232	+	0.539755	4.61848	16.2409	5.57778e-05	NM_009985	ENSMUSG00000024910	Ctsw	cathepsin W [Source:MGI Symbol;Acc:MGI:1338045]
chr7	43672031	43674489	2459	+	-0.511659	6.33791	10.9058	0.000958615	NM_145582	ENSMUSG00000038888	Ctu1	cytosolic thiouridylase subunit 1 homolog (S. pombe) [Source:MGI Symbol;Acc:MGI:2385277]
chr1	80266818	80269581	2764	+	0.858046	4.14283	8.73534	0.00312101	NM_016716	ENSMUSG00000004364	Cul3	cullin 3 [Source:MGI Symbol;Acc:MGI:1347360]
chr5	136248135	136251191	3057	+	-0.345964	6.06506	9.38878	0.00218318	NM_198602	ENSMUSG00000029705	Cux1	cut-like homeobox 1 [Source:MGI Symbol;Acc:MGI:88568]
chr9	3404085	3408037	3953	+	0.705525	3.49482	7.52987	0.00606843	NM_027545	ENSMUSG00000025898	Cwf19l2	CWF19-like 2, cell cycle control (S. pombe) [Source:MGI Symbol;Acc:MGI:1918023]
chr5	92359545	92361129	1585	+	-0.476522	4.29677	7.75283	0.00536284	NM_019494	ENSMUSG00000060183	Cxcl11	chemokine (C-X-C motif) ligand 11 [Source:MGI Symbol;Acc:MGI:1860203]
chr11	70454234	70456681	2448	+	0.85502	2.66064	8.29008	0.00398621	NM_023158	ENSMUSG00000018920	Cxcl16	chemokine (C-X-C motif) ligand 16 [Source:MGI Symbol;Acc:MGI:1932682]
chr7	25400053	25400812	760	+	1.32285	1.60264	7.07832	0.00780221	NM_153576	ENSMUSG00000060188	Cxcl17	chemokine (C-X-C motif) ligand 17 [Source:MGI Symbol;Acc:MGI:2387642]
chr5	90903899	90904981	1083	+	1.30111	2.45238	16.6372	4.52548e-05	NM_009140	ENSMUSG00000058427	Cxcl2	chemokine (C-X-C motif) ligand 2 [Source:MGI Symbol;Acc:MGI:1340094]
chr5	90759298	90760953	1656	+	1.45798	2.03134	14.5234	0.000138433	NM_009141	ENSMUSG00000029371	Cxcl5	chemokine (C-X-C motif) ligand 5 [Source:MGI Symbol;Acc:MGI:1096868]
chr5	92321331	92324235	2905	+	0.818008	3.51321	8.80432	0.00300518	NM_008599	ENSMUSG00000029417	Cxcl9	chemokine (C-X-C motif) ligand 9 [Source:MGI Symbol;Acc:MGI:1352449]
chr6	50562563	50565621	3059	+	0.660051	3.61206	11.0345	0.000894296	NM_007808	ENSMUSG00000063694	Cycs	cytochrome c, somatic [Source:MGI Symbol;Acc:MGI:88578]
chr1	60343372	60344872	1501	+	0.510108	4.48295	6.96808	0.00829765	NM_030013	ENSMUSG00000049439	Cyp20a1	cytochrome P450, family 20, subfamily a, polypeptide 1 [Source:MGI Symbol;Acc:MGI:1925201]
chr7	26931631	26933856	2226	+	0.588667	3.34717	7.55411	0.00598735	NM_001101467	ENSMUSG00000091867	Cyp2a22	cytochrome P450, family 2, subfamily a, polypeptide 22 [Source:MGI Symbol;Acc:MGI:3648316]
chr4	96568429	96570372	1944	+	1.07668	2.49977	7.87098	0.00502343	NM_028979	ENSMUSG00000015224	Cyp2j9	cytochrome P450, family 2, subfamily j, polypeptide 9 [Source:MGI Symbol;Acc:MGI:1921769]
chr3	17948444	17948952	509	+	-0.660386	3.68158	9.34382	0.00223739	NM_029289	ENSMUSG00000027564	Cypt12	cysteine-rich perinuclear theca 12 [Source:MGI Symbol;Acc:MGI:1922689]
chr14	27428847	27436422	7576	+	0.633843	4.75722	6.93911	0.00843309	NM_028945	ENSMUSG00000040651	D14Abb1e	DNA segment, Chr 14, Abbott 1 expressed [Source:MGI Symbol;Acc:MGI:1921694]
chr14	27428847	27436148	7302	+	0.654249	4.67609	7.68098	0.00558059	NM_001114879	ENSMUSG00000040651	D14Abb1e	DNA segment, Chr 14, Abbott 1 expressed [Source:MGI Symbol;Acc:MGI:1921694]
chr1	186967416	186970627	3212	+	-0.479463	6.63136	7.4464	0.00635634	NM_033077	ENSMUSG00000039224	D1Pas1	DNA segment, Chr 1, Pasteur Institute 1 [Source:MGI Symbol;Acc:MGI:91842]
chr1	93825240	93828297	3058	+	-0.446041	5.30461	9.33758	0.00224502	NM_178882	ENSMUSG00000073609	D2hgdh	D-2-hydroxyglutarate dehydrogenase [Source:MGI Symbol;Acc:MGI:2138209]
chr11	31817984	31818903	920	+	1.02239	2.49565	9.11458	0.00253581	NR_102311	ENSMUSG00000085772	D630024D03Rik	RIKEN cDNA D630024D03 gene [Source:MGI Symbol;Acc:MGI:3041224]
chr6	17197751	17199317	1567	+	0.802751	2.77592	7.20797	0.00725804	NR_102305	ENSMUSG00000085171	D830026I12Rik	RIKEN cDNA D830026I12 gene [Source:MGI Symbol;Acc:MGI:2442531]
chr5	104525735	104529543	3809	+	1.04123	2.78392	8.92557	0.00281206	NR_030673	ENSMUSG00000097392	D930016D06Rik	RIKEN cDNA D930016D06 gene [Source:MGI Symbol;Acc:MGI:2442700]
chr14	54235485	54236181	697	+	-0.479299	4.85594	10.4508	0.00122595	NM_001113358	ENSMUSG00000022174	Dad1	defender against cell death 1 [Source:MGI Symbol;Acc:MGI:101912]
chr2	164488111	164491714	3604	+	0.720887	3.59144	7.3777	0.00660374	NM_001048229	ENSMUSG00000017734	Dbndd2	dysbindin (dystrobrevin binding protein 1) domain containing 2 [Source:MGI Symbol;Acc:MGI:106562]
chr2	164486140	164489716	3577	+	0.726582	3.58558	7.83296	0.00513019	NM_001048227	ENSMUSG00000017734	Dbndd2	dysbindin (dystrobrevin binding protein 1) domain containing 2 [Source:MGI Symbol;Acc:MGI:106562]
chr2	164486455	164490160	3706	+	0.744991	3.58063	7.89354	0.00496116	NM_026797	ENSMUSG00000017734	Dbndd2	dysbindin (dystrobrevin binding protein 1) domain containing 2 [Source:MGI Symbol;Acc:MGI:106562]
chr2	164486877	164490477	3601	+	0.755836	3.59278	8.29321	0.00397936	NM_001048228	ENSMUSG00000017734	Dbndd2	dysbindin (dystrobrevin binding protein 1) domain containing 2 [Source:MGI Symbol;Acc:MGI:106562]
chr11	106036872	106042620	5749	+	0.586491	5.2099	8.26871	0.00403341	NM_027946	ENSMUSG00000049354	Dcaf7	DDB1 and CUL4 associated factor 7 [Source:MGI Symbol;Acc:MGI:1919083]
chr3	55461758	55466922	5165	+	0.835696	3.94018	7.99778	0.00468348	NM_001195540	ENSMUSG00000027797	Dclk1	doublecortin-like kinase 1 [Source:MGI Symbol;Acc:MGI:1330861]
chr17	23880876	23881492	617	+	1.80432	1.81382	15.5392	8.08134e-05	NM_019910	ENSMUSG00000096445	Dcpp1	demilune cell and parotid protein 1 [Source:MGI Symbol;Acc:MGI:105949]
chr10	127266262	127268185	1924	+	0.672628	4.40112	8.36711	0.00382072	NM_001190453	ENSMUSG00000025410	Dctn2	dynactin 2 [Source:MGI Symbol;Acc:MGI:107733]
chr10	127266262	127268180	1919	+	0.681097	4.39765	8.56817	0.0034209	NM_001190454	ENSMUSG00000025410	Dctn2	dynactin 2 [Source:MGI Symbol;Acc:MGI:107733]
chr10	127266262	127268179	1918	+	0.681097	4.39765	8.56817	0.0034209	NM_027151	ENSMUSG00000025410	Dctn2	dynactin 2 [Source:MGI Symbol;Acc:MGI:107733]
chr11	120725373	120726290	918	+	1.01396	2.50946	8.55228	0.00345089	NM_026428	ENSMUSG00000039450	Dcxr	dicarbonyl L-xylulose reductase [Source:MGI Symbol;Acc:MGI:1915130]
chr15	98645507	98648320	2814	+	-0.312132	6.97592	7.11017	0.00766477	NM_001080981	ENSMUSG00000003360	Ddx23	DEAD (Asp-Glu-Ala-Asp) box polypeptide 23 [Source:MGI Symbol;Acc:MGI:1921601]
chr2	28840406	28843733	3328	+	0.610583	4.56541	10.2961	0.00133315	NM_001033294	ENSMUSG00000026806	Ddx31	DEAD/H (Asp-Glu-Ala-Asp/His) box polypeptide 31 [Source:MGI Symbol;Acc:MGI:2682639]
chr17	26081211	26083261	2051	+	0.67947	3.48172	8.99112	0.00271295	NM_011933	ENSMUSG00000036775	Decr2	2-4-dienoyl-Coenzyme A reductase 2, peroxisomal [Source:MGI Symbol;Acc:MGI:1347059]
chr1	171329145	171331877	2733	+	-0.337621	5.4416	6.9804	0.00824072	NM_001128609	ENSMUSG00000013973	Dedd	death effector domain-containing [Source:MGI Symbol;Acc:MGI:1333874]
chr2	152622356	152622648	293	+	1.48529	1.55224	8.6722	0.00323101	NM_001039122	ENSMUSG00000074678	Defb25	defensin beta 25 [Source:MGI Symbol;Acc:MGI:3651158]
chr8	20892667	20893092	426	+	0.863954	2.28756	6.87576	0.00873725	NM_001039119	ENSMUSG00000074454	Defb33	defensin beta 33 [Source:MGI Symbol;Acc:MGI:3647176]
chr1	182275770	182277774	2005	+	-0.45324	5.01056	7.00229	0.00814055	NM_007853	ENSMUSG00000038633	Degs1	degenerative spermatocyte homolog 1 (Drosophila) [Source:MGI Symbol;Acc:MGI:1097711]
chr5	32863721	32871933	8213	+	0.239593	6.21151	7.52147	0.00609678	NM_001025426	ENSMUSG00000037426	Depdc5	DEP domain containing 5 [Source:MGI Symbol;Acc:MGI:2141101]
chr5	32863721	32871664	7944	+	0.244989	6.20596	8.02476	0.00461421	NM_001170567	ENSMUSG00000037426	Depdc5	DEP domain containing 5 [Source:MGI Symbol;Acc:MGI:2141101]
chr6	137754577	137756264	1688	+	-0.400476	5.99882	8.75771	0.00308296	NM_172733	ENSMUSG00000030225	Dera	2-deoxyribose-5-phosphate aldolase homolog (C. elegans) [Source:MGI Symbol;Acc:MGI:1913762]
chr15	81992523	81995433	2911	+	0.923247	3.35238	9.6514	0.00189207	NM_134095	ENSMUSG00000022472	Desi1	desumoylating isopeptidase 1 [Source:MGI Symbol;Acc:MGI:106313]
chr4	149104142	149105238	1097	+	-0.510365	4.48647	7.03519	0.00799234	NM_010044	ENSMUSG00000028974	Dffa	DNA fragmentation factor, alpha subunit [Source:MGI Symbol;Acc:MGI:1196227]
chr12	37880705	37886248	5544	+	0.74291	4.14712	14.3786	0.000149491	NM_178681	ENSMUSG00000036095	Dgkb	diacylglycerol kinase, beta [Source:MGI Symbol;Acc:MGI:2442474]
chr1	87853287	87858980	5694	+	0.592635	5.48239	13.6624	0.000218794	NM_177646	ENSMUSG00000070738	Dgkd	diacylglycerol kinase, delta [Source:MGI Symbol;Acc:MGI:2138334]
chr16	22466569	22472073	5505	+	0.204934	6.08478	7.15251	0.00748593	NM_138650	ENSMUSG00000022861	Dgkg	diacylglycerol kinase, gamma [Source:MGI Symbol;Acc:MGI:105060]
chr17	35879778	35883167	3390	+	-0.338377	7.03414	7.06177	0.00787464	NM_026987	ENSMUSG00000024422	Dhx16	DEAH (Asp-Glu-Ala-His) box polypeptide 16 [Source:MGI Symbol;Acc:MGI:1916442]
chr13	112927793	112931890	4098	+	-0.277471	6.82508	12.9814	0.000314594	NM_172594	ENSMUSG00000042426	Dhx29	DEAH (Asp-Glu-Ala-His) box polypeptide 29 [Source:MGI Symbol;Acc:MGI:2145374]
chr10	76263049	76269403	6355	+	-0.279731	7.79325	7.21523	0.00722875	NM_001081419	ENSMUSG00000020231	Dip2a	DIP2 disco-interacting protein 2 homolog A (Drosophila) [Source:MGI Symbol;Acc:MGI:2385920]
chr15	100154396	100162522	8127	+	-0.16093	6.96293	7.1738	0.00739759	NM_172819	ENSMUSG00000023026	Dip2b	DIP2 disco-interacting protein 2 homolog B (Drosophila) [Source:MGI Symbol;Acc:MGI:2145977]
chr16	35694903	35699456	4554	+	-0.273775	6.14104	11.1311	0.000848936	NM_153550	ENSMUSG00000022848	Dirc2	disrupted in renal carcinoma 2 (human) [Source:MGI Symbol;Acc:MGI:2387188]
chr9	64306756	64310330	3575	+	-0.251762	6.27218	9.81955	0.00172667	NM_001001295	ENSMUSG00000032396	Dis3l	DIS3 mitotic control homolog (S. cerevisiae)-like [Source:MGI Symbol;Acc:MGI:2143272]
chr9	64306756	64310234	3479	+	-0.250045	6.27097	9.69864	0.00184405	NM_172519	ENSMUSG00000032396	Dis3l	DIS3 mitotic control homolog (S. cerevisiae)-like [Source:MGI Symbol;Acc:MGI:2143272]
chr9	64306756	64310291	3536	+	-0.249281	6.27083	9.58807	0.00195845	NM_001177784	ENSMUSG00000032396	Dis3l	DIS3 mitotic control homolog (S. cerevisiae)-like [Source:MGI Symbol;Acc:MGI:2143272]
chr8	22624043	22625356	1314	+	-0.619716	4.65786	14.5653	0.000135382	NM_145592	ENSMUSG00000031535	Dkk4	dickkopf homolog 4 (Xenopus laevis) [Source:MGI Symbol;Acc:MGI:2385299]
chr8	36567739	36573909	6171	+	-0.295109	7.25119	7.95421	0.00479757	NM_015802	ENSMUSG00000031523	Dlc1	deleted in liver cancer 1 [Source:MGI Symbol;Acc:MGI:1354949]
chr8	36567739	36573991	6253	+	-0.294989	7.25301	7.96613	0.00476607	NM_001194941	ENSMUSG00000031523	Dlc1	deleted in liver cancer 1 [Source:MGI Symbol;Acc:MGI:1354949]
chr12	31331562	31333838	2277	+	0.903817	3.85581	11.091	0.000867472	NM_007861	ENSMUSG00000020664	Dld	dihydrolipoamide dehydrogenase [Source:MGI Symbol;Acc:MGI:107450]
chr7	91090786	91098194	7409	+	0.428149	5.41702	7.4154	0.00646679	NM_011807	ENSMUSG00000052572	Dlg2	discs, large homolog 2 (Drosophila) [Source:MGI Symbol;Acc:MGI:1344351]
chr7	92062394	92068643	6250	+	0.518468	5.09179	8.14893	0.00430865	NM_001243046	ENSMUSG00000052572	Dlg2	discs, large homolog 2 (Drosophila) [Source:MGI Symbol;Acc:MGI:1344351]
chr17	70561747	70565048	3302	+	-0.337577	6.60833	7.11451	0.00764625	NM_001128181	ENSMUSG00000003279	Dlgap1	discs, large (Drosophila) homolog-associated protein 1 [Source:MGI Symbol;Acc:MGI:1346065]
chr17	70522110	70527415	5306	+	-0.302518	6.75971	7.10296	0.00769567	NM_001128180	ENSMUSG00000003279	Dlgap1	discs, large (Drosophila) homolog-associated protein 1 [Source:MGI Symbol;Acc:MGI:1346065]
chr14	70602184	70606130	3947	+	0.499429	4.95269	13.1015	0.000295066	NM_001252666	ENSMUSG00000022099	Dmtn	dematin actin binding protein [Source:MGI Symbol;Acc:MGI:99670]
chr14	70602184	70606097	3914	+	0.50322	4.99494	12.9074	0.000327294	NM_001252665	ENSMUSG00000022099	Dmtn	dematin actin binding protein [Source:MGI Symbol;Acc:MGI:99670]
chr14	70602184	70606371	4188	+	0.514674	5.00829	13.485	0.000240473	NM_001252663	ENSMUSG00000022099	Dmtn	dematin actin binding protein [Source:MGI Symbol;Acc:MGI:99670]
chr14	70602184	70606312	4129	+	0.514776	5.01584	13.5684	0.000230025	NM_013514	ENSMUSG00000022099	Dmtn	dematin actin binding protein [Source:MGI Symbol;Acc:MGI:99670]
chr14	70602184	70606264	4081	+	0.522497	5.02186	16.1147	5.9618e-05	NM_001252664	ENSMUSG00000022099	Dmtn	dematin actin binding protein [Source:MGI Symbol;Acc:MGI:99670]
chr14	70602184	70606437	4254	+	0.537298	5.04657	15.0039	0.000107287	NM_001252662	ENSMUSG00000022099	Dmtn	dematin actin binding protein [Source:MGI Symbol;Acc:MGI:99670]
chr18	49832997	49845207	12211	+	0.725173	5.0258	9.90713	0.0016464	NM_001081371	ENSMUSG00000037416	Dmxl1	Dmx-like 1 [Source:MGI Symbol;Acc:MGI:2443926]
chr10	62947029	62951150	4122	+	-0.321363	7.27981	7.4185	0.00645565	NM_177372	ENSMUSG00000036875	Dna2	DNA replication helicase 2 homolog (yeast) [Source:MGI Symbol;Acc:MGI:2443732]
chr6	73017607	73030257	12651	+	-0.157442	8.32822	8.57634	0.0034056	NM_001164669	ENSMUSG00000052861	Dnah6	dynein, axonemal, heavy chain 6 [Source:MGI Symbol;Acc:MGI:107744]
chr17	30626936	30641518	14583	+	-0.245261	8.78632	11.0468	0.00088842	NM_013811	ENSMUSG00000033826	Dnah8	dynein, axonemal, heavy chain 8 [Source:MGI Symbol;Acc:MGI:107714]
chr4	40722930	40728410	5481	+	0.808001	3.05273	8.55237	0.00345073	NM_001164672	ENSMUSG00000028410	Dnaja1	DnaJ (Hsp40) homolog, subfamily A, member 1 [Source:MGI Symbol;Acc:MGI:1270129]
chr7	100503020	100504162	1143	+	0.912456	3.38231	10.6337	0.00111043	NM_153527	ENSMUSG00000030708	Dnajb13	DnaJ (Hsp40) related, subfamily B, member 13 [Source:MGI Symbol;Acc:MGI:1916637]
chr5	29735898	29737542	1645	+	0.733053	3.99943	11.7562	0.000606408	NM_011847	ENSMUSG00000029131	Dnajb6	DnaJ (Hsp40) homolog, subfamily B, member 6 [Source:MGI Symbol;Acc:MGI:1344381]
chr5	29735898	29737539	1642	+	0.733053	3.99943	11.7562	0.000606408	NM_001127367	ENSMUSG00000029131	Dnajb6	DnaJ (Hsp40) homolog, subfamily B, member 6 [Source:MGI Symbol;Acc:MGI:1344381]
chr15	99099484	99100945	1462	+	-0.368893	4.58669	7.16767	0.0074229	NM_176835	ENSMUSG00000038009	Dnajc22	DnaJ (Hsp40) homolog, subfamily C, member 22 [Source:MGI Symbol;Acc:MGI:1920028]
chr4	101496648	101501774	5127	+	0.279978	5.57151	8.71563	0.00315494	NM_198412	ENSMUSG00000028528	Dnajc6	DnaJ (Hsp40) homolog, subfamily C, member 6 [Source:MGI Symbol;Acc:MGI:1919935]
chr4	101507976	101513193	5218	+	0.281919	5.57475	9.02048	0.00266971	NM_001164585	ENSMUSG00000028528	Dnajc6	DnaJ (Hsp40) homolog, subfamily C, member 6 [Source:MGI Symbol;Acc:MGI:1919935]
chr1	80501068	80508375	7308	+	0.37991	6.37952	10.1544	0.00143958	NM_175291	ENSMUSG00000038608	Dock10	dedicator of cytokinesis 10 [Source:MGI Symbol;Acc:MGI:2146320]
chr9	106892825	106901887	9063	+	0.650619	5.33831	12.4197	0.000424824	NM_153413	ENSMUSG00000039716	Dock3	dedicator of cyto-kinesis 3 [Source:MGI Symbol;Acc:MGI:2429763]
chr19	24999529	25007338	7810	+	-0.204162	7.57464	10.0047	0.0015614	NM_028785	ENSMUSG00000052085	Dock8	dedicator of cytokinesis 8 [Source:MGI Symbol;Acc:MGI:1921396]
chr9	86467154	86476277	9124	+	0.61182	5.11049	7.74491	0.00538643	NM_177208	ENSMUSG00000034973	Dopey1	dopey family member 1 [Source:MGI Symbol;Acc:MGI:1289294]
chr3	106547798	106550258	2461	+	0.812302	2.64932	7.38268	0.00658548	NM_001025582	ENSMUSG00000027900	Dram2	DNA-damage regulated autophagy modulator 2 [Source:MGI Symbol;Acc:MGI:1914421]
chr3	106547798	106550519	2722	+	0.989192	2.78051	11.2216	0.000808489	NM_026013	ENSMUSG00000027900	Dram2	DNA-damage regulated autophagy modulator 2 [Source:MGI Symbol;Acc:MGI:1914421]
chr15	12824815	12829381	4567	+	-0.355774	7.77646	10.1164	0.0014696	NM_026799	ENSMUSG00000022191	Drosha	drosha, ribonuclease type III [Source:MGI Symbol;Acc:MGI:1261425]
chr15	12824815	12829385	4571	+	-0.355774	7.77646	10.1164	0.0014696	NM_001130149	ENSMUSG00000022191	Drosha	drosha, ribonuclease type III [Source:MGI Symbol;Acc:MGI:1261425]
chr16	96592079	96599559	7481	+	-0.316991	7.33262	9.54254	0.00200764	NM_031174	ENSMUSG00000050272	Dscam	Down syndrome cell adhesion molecule [Source:MGI Symbol;Acc:MGI:1196281]
chr13	38151294	38160885	9592	+	-0.319846	8.0748	7.59416	0.00585577	NM_023842	ENSMUSG00000054889	Dsp	desmoplakin [Source:MGI Symbol;Acc:MGI:109611]
chr1	34160330	34169116	8787	+	-0.376081	7.94361	13.1444	0.000288377	NM_010081	ENSMUSG00000026131	Dst	dystonin [Source:MGI Symbol;Acc:MGI:104627]
chr1	34011825	34029034	17210	+	-0.321896	9.1977	12.0684	0.000512834	NM_133833	ENSMUSG00000026131	Dst	dystonin [Source:MGI Symbol;Acc:MGI:104627]
chr1	33908225	33932495	24271	+	-0.302218	9.44594	11.5643	0.000672299	NM_001276764	ENSMUSG00000026131	Dst	dystonin [Source:MGI Symbol;Acc:MGI:104627]
chr1	34011825	34035076	23252	+	-0.299433	9.40423	11.6789	0.00063212	NM_134448	ENSMUSG00000026131	Dst	dystonin [Source:MGI Symbol;Acc:MGI:104627]
chr1	184034461	184037172	2712	+	-0.428029	5.77855	7.82094	0.00516444	NM_022019	ENSMUSG00000039384	Dusp10	dual specificity phosphatase 10 [Source:MGI Symbol;Acc:MGI:1927070]
chr6	134715468	134719613	4146	+	0.975199	3.38094	9.71622	0.00182648	NM_001048054	ENSMUSG00000030203	Dusp16	dual specificity phosphatase 16 [Source:MGI Symbol;Acc:MGI:1917936]
chr6	134715468	134720579	5112	+	1.0179	3.55859	12.9276	0.000323764	NM_130447	ENSMUSG00000030203	Dusp16	dual specificity phosphatase 16 [Source:MGI Symbol;Acc:MGI:1917936]
chr14	41072911	41073905	995	+	-0.448153	4.19749	7.53763	0.00604234	NM_027094	ENSMUSG00000021790	Dydc1	DPY30 domain containing 1 [Source:MGI Symbol;Acc:MGI:1916746]
chr17	84626499	84627825	1327	+	-0.413059	5.3954	8.84903	0.00293245	NM_172256	ENSMUSG00000024253	Dync2li1	dynein cytoplasmic 2 light intermediate chain 1 [Source:MGI Symbol;Acc:MGI:1913996]
chrX	9654270	9656422	2153	+	0.849292	2.59082	8.66332	0.0032468	NM_025975	ENSMUSG00000031176	Dynlt3	dynein light chain Tctex-type 3 [Source:MGI Symbol;Acc:MGI:1914367]
chr10	118859349	118861485	2137	+	-0.466106	6.09552	7.56809	0.00594106	NM_001014390	ENSMUSG00000028630	Dyrk2	dual-specificity tyrosine-(Y)-phosphorylation regulated kinase 2 [Source:MGI Symbol;Acc:MGI:1330301]
chr1	131128441	131130512	2072	+	-0.44039	5.98989	8.02079	0.00462433	NM_145508	ENSMUSG00000016526	Dyrk3	dual-specificity tyrosine-(Y)-phosphorylation regulated kinase 3 [Source:MGI Symbol;Acc:MGI:1330300]
chr2	144470557	144477387	6831	+	0.79472	4.48495	8.08524	0.00446271	NM_172859	ENSMUSG00000037259	Dzank1	double zinc ribbon and ankyrin repeat domains 1 [Source:MGI Symbol;Acc:MGI:2139080]
chr14	118875520	118879995	4476	+	-0.332775	7.10707	10.7056	0.00106813	NM_025943	ENSMUSG00000042156	Dzip1	DAZ interacting protein 1 [Source:MGI Symbol;Acc:MGI:1914311]
chr4	97567875	97569105	1231	+	1.47233	1.68453	9.32907	0.00225546	NR_015513	ENSMUSG00000048747	E130114P18Rik	RIKEN cDNA E130114P18 gene [Source:MGI Symbol;Acc:MGI:2442873]
chr18	36684923	36686938	2016	+	0.953398	2.82789	11.9708	0.000540396	NM_172831	ENSMUSG00000044719	E230025N22Rik	Riken cDNA E230025N22 gene [Source:MGI Symbol;Acc:MGI:3687212]
chr4	136172394	136177131	4738	+	0.316601	5.47182	7.40704	0.0064969	NM_177733	ENSMUSG00000018983	E2f2	E2F transcription factor 2 [Source:MGI Symbol;Acc:MGI:1096341]
chr14	31495079	31499316	4238	+	-0.385535	5.38111	9.92995	0.00162611	NM_028932	ENSMUSG00000021890	Eaf1	ELL associated factor 1 [Source:MGI Symbol;Acc:MGI:1921677]
chr16	36792884	36794771	1888	+	0.745493	2.60427	7.15991	0.00745509	NM_001113401	ENSMUSG00000022838	Eaf2	ELL associated factor 2 [Source:MGI Symbol;Acc:MGI:2146616]
chr12	54673467	54674509	1043	+	0.944627	2.86276	12.0967	0.000505121	NM_025456	ENSMUSG00000054302	Eapp	E2F-associated phosphoprotein [Source:MGI Symbol;Acc:MGI:1913516]
chr14	43818765	43819477	713	+	1.3202	1.54071	7.0718	0.00783066	NM_007894	ENSMUSG00000072601	Ear1	eosinophil-associated, ribonuclease A family, member 1 [Source:MGI Symbol;Acc:MGI:108021]
chr10	29313166	29316111	2946	+	0.535408	4.1231	6.89435	0.00864687	NM_001110195	ENSMUSG00000019883	Echdc1	enoyl Coenzyme A hydratase domain containing 1 [Source:MGI Symbol;Acc:MGI:1277169]
chr6	108828641	108834498	5858	+	0.360013	5.18665	8.1871	0.00421892	NM_138677	ENSMUSG00000030104	Edem1	ER degradation enhancer, mannosidase alpha-like 1 [Source:MGI Symbol;Acc:MGI:2180139]
chr6	87730869	87733621	2753	+	0.737038	3.33376	11.1966	0.000819481	NM_001159697	ENSMUSG00000068263	Efcc1	EF hand and coiled-coil domain containing 1 [Source:MGI Symbol;Acc:MGI:3611451]
chr12	3962554	3969100	6547	+	0.351007	5.57474	13.6819	0.000216536	NM_001082483	ENSMUSG00000020658	Efr3b	EFR3 homolog B (S. cerevisiae) [Source:MGI Symbol;Acc:MGI:2444851]
chr7	82648614	82652221	3608	+	-0.246248	6.08193	7.72788	0.00543744	NM_001159672	ENSMUSG00000038563	Eftud1	elongation factor Tu GTP binding domain containing 1 [Source:MGI Symbol;Acc:MGI:2141969]
chr7	82648614	82652250	3637	+	-0.246248	6.08193	7.72788	0.00543744	NM_175317	ENSMUSG00000038563	Eftud1	elongation factor Tu GTP binding domain containing 1 [Source:MGI Symbol;Acc:MGI:2141969]
chr17	73804841	73808498	3658	+	-0.35714	5.7625	10.3962	0.00126278	NM_020578	ENSMUSG00000024065	Ehd3	EH-domain containing 3 [Source:MGI Symbol;Acc:MGI:1928900]
chr2	120089487	120092873	3387	+	0.426828	4.77215	9.00004	0.00269974	NM_133838	ENSMUSG00000027293	Ehd4	EH-domain containing 4 [Source:MGI Symbol;Acc:MGI:1919619]
chr2	103263433	103267819	4387	+	0.620728	3.35585	8.17875	0.0042384	NM_007914	ENSMUSG00000012350	Ehf	ets homologous factor [Source:MGI Symbol;Acc:MGI:1270840]
chr6	70844527	70849022	4496	+	-0.254758	6.88825	7.96229	0.00477619	NM_010121	ENSMUSG00000031668	Eif2ak3	eukaryotic translation initiation factor 2 alpha kinase 3 [Source:MGI Symbol;Acc:MGI:1341830]
chrX	94188709	94192295	3587	+	0.776812	2.9992	9.79016	0.00175448	NM_012010	ENSMUSG00000035150	Eif2s3x	eukaryotic translation initiation factor 2, subunit 3, structural gene X-linked [Source:MGI Symbol;Acc:MGI:1349431]
chr16	23107468	23110652	3185	+	-0.558368	4.17438	11.2329	0.000803617	NM_001123038	ENSMUSG00000022884	Eif4a2	eukaryotic translation initiation factor 4A2 [Source:MGI Symbol;Acc:MGI:106906]
chr13	54783998	54785898	1901	+	0.51896	3.51495	7.16888	0.00741791	NM_001033269	ENSMUSG00000074895	Eif4e1b	eukaryotic translation initiation factor 4E family member 1B [Source:MGI Symbol;Acc:MGI:2685119]
chr8	27260327	27261307	981	+	1.06548	2.35385	8.29501	0.00397541	NM_007918	ENSMUSG00000031490	Eif4ebp1	eukaryotic translation initiation factor 4E binding protein 1 [Source:MGI Symbol;Acc:MGI:103267]
chr8	4284782	4290811	6030	+	0.813082	4.05536	10.0971	0.00148501	NM_010485	ENSMUSG00000040028	Elavl1	ELAV (embryonic lethal, abnormal vision)-like 1 (Hu antigen R) [Source:MGI Symbol;Acc:MGI:1100851]
chr9	22112989	22114041	1053	+	1.00231	2.46709	8.87735	0.0028873	NM_170777	ENSMUSG00000013822	Elof1	elongation factor 1 homolog (ELF1, S. cerevisiae) [Source:MGI Symbol;Acc:MGI:1913376]
chr13	117220573	117223194	2622	+	1.19349	3.36944	11.093	0.000866532	NM_010330	ENSMUSG00000021728	Emb	embigin [Source:MGI Symbol;Acc:MGI:95321]
chr12	108422816	108426975	4160	+	-0.273597	7.22312	8.25197	0.00407078	NM_001043335	ENSMUSG00000058070	Eml1	echinoderm microtubule associated protein like 1 [Source:MGI Symbol;Acc:MGI:1915769]
chr12	108410633	108414409	3777	+	-0.27049	7.23018	7.99893	0.00468051	NM_001043336	ENSMUSG00000058070	Eml1	echinoderm microtubule associated protein like 1 [Source:MGI Symbol;Acc:MGI:1915769]
chr17	83350931	83356037	5107	+	-0.228443	6.45993	9.66945	0.00187357	NM_199466	ENSMUSG00000032624	Eml4	echinoderm microtubule associated protein like 4 [Source:MGI Symbol;Acc:MGI:1926048]
chr17	83350931	83356166	5236	+	-0.217821	6.50136	8.7586	0.00308145	NM_001114362	ENSMUSG00000032624	Eml4	echinoderm microtubule associated protein like 4 [Source:MGI Symbol;Acc:MGI:1926048]
chr7	45918023	45918780	758	+	-0.767628	3.2072	9.61111	0.00193404	NM_010129	ENSMUSG00000040212	Emp3	epithelial membrane protein 3 [Source:MGI Symbol;Acc:MGI:1098729]
chr7	45918023	45918809	787	+	-0.765569	3.22513	10.1874	0.00141402	NM_001146346	ENSMUSG00000040212	Emp3	epithelial membrane protein 3 [Source:MGI Symbol;Acc:MGI:1098729]
chr15	97711019	97713423	2405	+	0.462516	4.30671	8.77736	0.00304992	NM_001168693	ENSMUSG00000022468	Endou	endonuclease, polyU-specific [Source:MGI Symbol;Acc:MGI:97746]
chr15	97711019	97713422	2404	+	0.586085	3.88379	10.9348	0.000943727	NM_008902	ENSMUSG00000022468	Endou	endonuclease, polyU-specific [Source:MGI Symbol;Acc:MGI:97746]
chr11	119491347	119496458	5112	+	0.470051	4.4797	7.2033	0.00727697	NM_001164636	ENSMUSG00000039850	Endov	endonuclease V [Source:MGI Symbol;Acc:MGI:2444688]
chr11	119491620	119496783	5164	+	0.475986	4.48109	7.49736	0.00617895	NM_177394	ENSMUSG00000039850	Endov	endonuclease V [Source:MGI Symbol;Acc:MGI:2444688]
chr8	46986925	46989989	3065	+	-0.427113	4.70977	9.98542	0.00157784	NM_177304	ENSMUSG00000038173	Enpp6	ectonucleotide pyrophosphatase/phosphodiesterase 6 [Source:MGI Symbol;Acc:MGI:2445171]
chr3	95624980	95627255	2276	+	1.01925	2.17039	8.15842	0.00428618	NM_001026212	ENSMUSG00000038619	Ensa	endosulfine alpha [Source:MGI Symbol;Acc:MGI:1891189]
chr2	25080323	25082628	2306	+	0.757447	3.08449	9.398	0.00217222	NM_028093	ENSMUSG00000036813	Entpd8	ectonucleoside triphosphate diphosphohydrolase 8 [Source:MGI Symbol;Acc:MGI:1919340]
chr15	81586214	81594962	8749	+	0.664163	5.2781	7.27372	0.00699709	NM_177821	ENSMUSG00000055024	Ep300	E1A binding protein p300 [Source:MGI Symbol;Acc:MGI:1276116]
chr17	69156810	69160854	4045	+	-0.334008	7.37642	8.25296	0.00406857	NM_013813	ENSMUSG00000024044	Epb4.1l3	erythrocyte protein band 4.1-like 3 [Source:MGI Symbol;Acc:MGI:103008]
chr13	19591708	19594094	2387	+	1.01893	2.79098	11.2398	0.000800615	NM_134065	ENSMUSG00000002808	Epdr1	ependymin related protein 1 (zebrafish) [Source:MGI Symbol;Acc:MGI:2145369]
chr16	63545218	63549195	3978	+	-0.214993	6.0409	6.87078	0.00876163	NM_010140	ENSMUSG00000052504	Epha3	Eph receptor A3 [Source:MGI Symbol;Acc:MGI:99612]
chr1	180989556	180991220	1665	+	0.587321	3.53624	8.27859	0.00401153	NM_010145	ENSMUSG00000038776	Ephx1	epoxide hydrolase 1, microsomal [Source:MGI Symbol;Acc:MGI:95405]
chr1	185363095	185367944	4850	+	0.359421	5.98551	8.4338	0.00368311	NM_029735	ENSMUSG00000026615	Eprs	glutamyl-prolyl-tRNA synthetase [Source:MGI Symbol;Acc:MGI:97838]
chr7	4464735	4468508	3774	+	-0.442033	5.02061	8.12895	0.0043564	NM_026146	ENSMUSG00000006154	Eps8l1	EPS8-like 1 [Source:MGI Symbol;Acc:MGI:1914675]
chr7	141339002	141342066	3065	+	0.621552	4.64825	7.9276	0.00486865	NM_133191	ENSMUSG00000025504	Eps8l2	EPS8-like 2 [Source:MGI Symbol;Acc:MGI:2138828]
chr11	78073376	78075389	2014	+	1.12769	3.17828	14.7813	0.000120728	NM_022313	ENSMUSG00000020832	Eral1	Era (G-protein)-like 1 (E. coli) [Source:MGI Symbol;Acc:MGI:1889295]
chrX	102142820	102147017	4198	+	0.907235	3.10649	11.8722	0.000569772	NM_146235	ENSMUSG00000051220	Ercc6l	excision repair cross-complementing rodent repair deficiency complementation group 6 like [Source:MGI Symbol;Acc:MGI:2654144]
chr5	91074617	91078752	4136	+	1.23218	3.19637	14.4562	0.000143459	NM_007950	ENSMUSG00000029377	Ereg	epiregulin [Source:MGI Symbol;Acc:MGI:107508]
chr7	119783826	119787394	3569	+	0.78609	3.56635	7.79905	0.00522738	NM_027698	ENSMUSG00000030929	Eri2	exoribonuclease 2 [Source:MGI Symbol;Acc:MGI:1918401]
chr13	12565883	12570121	4239	+	0.617124	4.68765	9.84818	0.0017	NM_026184	ENSMUSG00000057069	Ero1lb	ERO1-like beta (S. cerevisiae) [Source:MGI Symbol;Acc:MGI:1914725]
chr18	10566512	10571051	4540	+	1.19768	3.11441	17.3506	3.10807e-05	NM_001081222	ENSMUSG00000024293	Esco1	establishment of cohesion 1 homolog 1 (S. cerevisiae) [Source:MGI Symbol;Acc:MGI:1925055]
chr14	65819027	65821925	2899	+	0.782864	3.48781	7.96493	0.00476923	NM_028039	ENSMUSG00000022034	Esco2	establishment of cohesion 1 homolog 2 (S. cerevisiae) [Source:MGI Symbol;Acc:MGI:1919238]
chr11	17938749	17942940	4192	+	0.621499	4.03623	8.39115	0.00377052	NM_026576	ENSMUSG00000016984	Etaa1	Ewing's tumor-associated antigen 1 [Source:MGI Symbol;Acc:MGI:1915395]
chr9	119444923	119448775	3853	+	-0.284197	6.23518	9.58691	0.00195969	NM_172456	ENSMUSG00000042787	Exog	endo/exonuclease (5'-3'), endonuclease G-like [Source:MGI Symbol;Acc:MGI:2143333]
chr9	119444923	119448810	3888	+	-0.282426	6.23578	9.44188	0.00212086	NM_001172136	ENSMUSG00000042787	Exog	endo/exonuclease (5'-3'), endonuclease G-like [Source:MGI Symbol;Acc:MGI:2143333]
chr9	123113231	123114267	1037	+	0.792429	3.6083	7.85469	0.00506892	NM_001081188	ENSMUSG00000025785	Exosc7	exosome component 7 [Source:MGI Symbol;Acc:MGI:1913696]
chr13	95601789	95605084	3296	+	-0.436331	6.0791	7.32724	0.00679175	NM_010169	ENSMUSG00000048376	F2r	coagulation factor II (thrombin) receptor [Source:MGI Symbol;Acc:MGI:101802]
chr3	121723537	121725412	1876	+	-0.317399	5.48872	7.39876	0.00652689	NM_010171	ENSMUSG00000028128	F3	coagulation factor III [Source:MGI Symbol;Acc:MGI:88381]
chr10	127195249	127197644	2396	+	0.667737	3.85883	7.68657	0.00556333	NR_045716	ENSMUSG00000097331	F420014N23Rik	RIKEN cDNA F420014N23 gene [Source:MGI Symbol;Acc:MGI:3642477]
chr10	127195249	127197800	2552	+	0.696914	3.89577	8.24567	0.00408492	NR_045715	ENSMUSG00000097331	F420014N23Rik	RIKEN cDNA F420014N23 gene [Source:MGI Symbol;Acc:MGI:3642477]
chr15	99497005	99501672	4668	+	0.483398	4.71044	13.4905	0.000239771	NM_028224	ENSMUSG00000023011	Faim2	Fas apoptotic inhibitory molecule 2 [Source:MGI Symbol;Acc:MGI:1919643]
chr15	99497005	99501636	4632	+	0.48907	4.59199	11.9416	0.00054893	NM_001038658	ENSMUSG00000023011	Faim2	Fas apoptotic inhibitory molecule 2 [Source:MGI Symbol;Acc:MGI:1919643]
chr6	42672547	42676284	3738	+	-0.403678	5.81221	11.1634	0.000834265	NM_029930	ENSMUSG00000036667	Fam115a	family with sequence similarity 115, member A [Source:MGI Symbol;Acc:MGI:1914665]
chr6	86365683	86367288	1606	+	0.735944	2.82639	7.69754	0.00552962	NM_025591	ENSMUSG00000057497	Fam136a	family with sequence similarity 136, member A [Source:MGI Symbol;Acc:MGI:1913738]
chr2	25218745	25219870	1126	+	0.862089	2.56242	7.24143	0.00712402	NM_026624	ENSMUSG00000026969	Fam166a	family with sequence similarity 166, member A [Source:MGI Symbol;Acc:MGI:3605773]
chr7	100706702	100713284	6583	+	0.544315	4.2413	9.54008	0.00201033	NM_178764	ENSMUSG00000029461	Fam168a	family with sequence similarity 168, member A [Source:MGI Symbol;Acc:MGI:2442372]
chr19	44931119	44937998	6880	+	0.719629	4.36467	7.66148	0.00564122	NM_001081225	ENSMUSG00000036097	Fam178a	family with sequence similarity 178, member A [Source:MGI Symbol;Acc:MGI:1924968]
chr6	35312746	35314273	1528	+	1.18176	2.11466	9.91608	0.00163841	NM_173375	ENSMUSG00000047420	Fam180a	family with sequence similarity 180, member A [Source:MGI Symbol;Acc:MGI:3039626]
chr7	134881908	134886544	4637	+	-0.350593	6.14109	8.45286	0.00364469	NM_001143802	ENSMUSG00000073805	Fam196a	family with sequence similarity 196, member A [Source:MGI Symbol;Acc:MGI:3605068]
chr14	40993740	40995276	1537	+	0.757131	3.01936	8.23783	0.00410262	NM_027464	ENSMUSG00000021792	Fam213a	family with sequence similarity 213, member A [Source:MGI Symbol;Acc:MGI:1917814]
chr5	122364584	122365566	983	+	1.14577	2.37894	11.366	0.000747988	NM_026883	ENSMUSG00000029463	Fam216a	family with sequence similarity 216, member A [Source:MGI Symbol;Acc:MGI:1916198]
chr12	4746216	4749101	2886	+	0.985613	2.40592	9.19392	0.00242821	NM_175431	ENSMUSG00000050545	Fam228b	family with sequence similarity 228, member B [Source:MGI Symbol;Acc:MGI:2442121]
chr10	39118808	39119537	730	+	1.46693	1.89026	8.81297	0.00299097	NM_183254	ENSMUSG00000051736	Fam229b	family with sequence similarity 229, member B [Source:MGI Symbol;Acc:MGI:1913587]
chr14	34351882	34352248	367	+	1.28267	2.20543	10.2529	0.00136469	NM_183278	ENSMUSG00000043681	Fam25c	family with sequence similarity 25, member C [Source:MGI Symbol;Acc:MGI:1916384]
chr16	97471086	97471936	851	+	0.805702	2.95191	8.88729	0.00287162	NM_020622	ENSMUSG00000022938	Fam3b	family with sequence similarity 3, member B [Source:MGI Symbol;Acc:MGI:1270150]
chrX	78737763	78739410	1648	+	0.900809	2.29277	7.03694	0.00798452	NM_001164739	ENSMUSG00000078315	Fam47c	family with sequence similarity 47, member C [Source:MGI Symbol;Acc:MGI:1918114]
chr9	70599014	70607094	8081	+	0.779071	4.33548	10.0628	0.00151295	NM_172772	ENSMUSG00000042444	Fam63b	family with sequence similarity 63, member B [Source:MGI Symbol;Acc:MGI:2443086]
chr2	26628457	26630078	1622	+	0.537123	3.9123	7.32484	0.00680082	NM_019833	ENSMUSG00000036186	Fam69b	family with sequence similarity 69, member B [Source:MGI Symbol;Acc:MGI:1927576]
chr12	78691535	78693278	1744	+	-0.584649	3.97897	9.39464	0.0021762	NM_027597	ENSMUSG00000056987	Fam71d	family with sequence similarity 71, member D [Source:MGI Symbol;Acc:MGI:1918147]
chr12	78691535	78693312	1778	+	-0.570488	3.98332	9.02834	0.00265826	NM_029069	ENSMUSG00000056987	Fam71d	family with sequence similarity 71, member D [Source:MGI Symbol;Acc:MGI:1918147]
chr15	76001092	76005626	4535	+	0.517042	5.07958	8.82006	0.00297936	NM_001168253	ENSMUSG00000046761	Fam83h	family with sequence similarity 83, member H [Source:MGI Symbol;Acc:MGI:2145900]
chr15	76001092	76005594	4503	+	0.526821	5.09084	9.25221	0.00235212	NM_134087	ENSMUSG00000046761	Fam83h	family with sequence similarity 83, member H [Source:MGI Symbol;Acc:MGI:2145900]
chr4	12153722	12155047	1326	+	0.938466	2.24252	7.28929	0.00693671	NM_026558	ENSMUSG00000028218	Fam92a	family with sequence similarity 92, member A [Source:MGI Symbol;Acc:MGI:1915349]
chr11	26387084	26388850	1767	+	1.08844	2.55157	9.33988	0.0022422	NM_001277273	ENSMUSG00000004018	Fancl	Fanconi anemia, complementation group L [Source:MGI Symbol;Acc:MGI:1914280]
chr11	26387084	26388865	1782	+	1.08844	2.55157	9.33988	0.0022422	NM_025923	ENSMUSG00000004018	Fancl	Fanconi anemia, complementation group L [Source:MGI Symbol;Acc:MGI:1914280]
chr6	148047416	148050812	3397	+	0.943783	3.42925	7.87294	0.005018	NM_178797	ENSMUSG00000030303	Far2	fatty acyl CoA reductase 2 [Source:MGI Symbol;Acc:MGI:2687035]
chr14	121035574	121040430	4857	+	-0.330465	7.50182	8.54211	0.00347023	NM_134082	ENSMUSG00000025555	Farp1	FERM, RhoGEF (Arhgef) and pleckstrin domain protein 1 (chondrocyte-derived) [Source:MGI Symbol;Acc:MGI:2446173]
chr8	44950208	44964834	14627	+	-0.509255	9.3202	11.3213	0.000766212	NM_001081286	ENSMUSG00000070047	Fat1	FAT tumor suppressor homolog 1 (Drosophila) [Source:MGI Symbol;Acc:MGI:109168]	ortholog of the Drosophila fat gene, which encodes a tumor suppressor essential for controlling cell proliferation during Drosophila development / cell communication
chr18	58008623	58019102	10480	+	-0.212129	8.50529	7.15017	0.00749569	NM_010181	ENSMUSG00000024598	Fbn2	fibrillin 2 [Source:MGI Symbol;Acc:MGI:95490]
chr11	98082554	98091160	8607	+	0.309705	6.05085	7.22461	0.0071911	NM_028149	ENSMUSG00000020883	Fbxl20	F-box and leucine-rich repeat protein 20 [Source:MGI Symbol;Acc:MGI:1919444]
chr11	97854307	97855987	1681	+	1.03072	2.38628	8.5899	0.00338033	NM_001081435	ENSMUSG00000070336	Fbxo47	F-box protein 47 [Source:MGI Symbol;Acc:MGI:1920223]
chr9	109179227	109180711	1485	+	0.947858	2.55507	9.70229	0.00184038	NM_177598	ENSMUSG00000049314	Fbxw13	F-box and WD-40 domain protein 13 [Source:MGI Symbol;Acc:MGI:3505590]
chr1	173221271	173222296	1026	+	1.18738	1.87044	8.32011	0.00392085	NM_010184	ENSMUSG00000005339	Fcer1a	Fc receptor, IgE, high affinity I, alpha polypeptide [Source:MGI Symbol;Acc:MGI:95494]
chr13	98723406	98728524	5119	+	0.642805	4.42063	7.80645	0.00520602	NM_172591	ENSMUSG00000041685	Fcho2	FCH domain only 2 [Source:MGI Symbol;Acc:MGI:3505790]
chr3	87435782	87438438	2657	+	0.671175	3.89201	9.04185	0.00263868	NM_001113238	ENSMUSG00000048031	Fcrl5	Fc receptor-like 5 [Source:MGI Symbol;Acc:MGI:3053558]
chr1	170917594	170919254	1661	+	1.23261	2.61206	11.298	0.000775909	NM_001160215	ENSMUSG00000038421	Fcrla	Fc receptor-like A [Source:MGI Symbol;Acc:MGI:2138647]
chr1	170917594	170919251	1658	+	1.23261	2.61206	11.298	0.000775909	NM_145141	ENSMUSG00000038421	Fcrla	Fc receptor-like A [Source:MGI Symbol;Acc:MGI:2138647]
chr1	170917594	170919320	1727	+	1.24012	2.62092	12.2804	0.000457747	NR_027666	ENSMUSG00000038421	Fcrla	Fc receptor-like A [Source:MGI Symbol;Acc:MGI:2138647]
chr3	87250965	87252955	1991	+	0.893148	3.51701	10.7525	0.00104136	NM_030707	ENSMUSG00000015852	Fcrls	Fc receptor-like S, scavenger receptor [Source:MGI Symbol;Acc:MGI:1933397]
chr6	127072902	127075603	2702	+	0.656105	3.70166	8.60054	0.00336063	NM_022657	ENSMUSG00000000182	Fgf23	fibroblast growth factor 23 [Source:MGI Symbol;Acc:MGI:1891427]
chr3	83007896	83009418	1523	+	-0.342608	5.18164	9.38695	0.00218535	NM_133862	ENSMUSG00000033860	Fgg	fibrinogen gamma chain [Source:MGI Symbol;Acc:MGI:95526]
chr8	41191434	41192553	1120	+	1.29423	2.37653	12.9277	0.000323755	NM_145594	ENSMUSG00000031594	Fgl1	fibrinogen-like protein 1 [Source:MGI Symbol;Acc:MGI:102795]
chr1	175601378	175603009	1632	+	-0.319723	5.60059	8.36503	0.0038251	NM_010209	ENSMUSG00000026526	Fh1	fumarate hydratase 1 [Source:MGI Symbol;Acc:MGI:95530]
chr11	11800288	11803131	2844	+	0.890224	3.59084	7.04664	0.00794142	NM_001163360	ENSMUSG00000035455	Fignl1	fidgetin-like 1 [Source:MGI Symbol;Acc:MGI:1890648]
chr11	11800288	11803261	2974	+	0.893464	3.62001	7.3555	0.00668581	NM_001163359	ENSMUSG00000035455	Fignl1	fidgetin-like 1 [Source:MGI Symbol;Acc:MGI:1890648]
chr11	11800288	11803251	2964	+	0.893464	3.62001	7.3555	0.00668581	NM_021891	ENSMUSG00000035455	Fignl1	fidgetin-like 1 [Source:MGI Symbol;Acc:MGI:1890648]
chr9	79815562	79819768	4207	+	-0.402787	6.656	13.4845	0.000240536	NM_001081243	ENSMUSG00000034898	Filip1	filamin A interacting protein 1 [Source:MGI Symbol;Acc:MGI:1917848]
chr16	57353277	57357222	3946	+	0.647592	3.64414	8.05296	0.00454293	NM_001040397	ENSMUSG00000043336	Filip1l	filamin A interacting protein 1-like [Source:MGI Symbol;Acc:MGI:1925999]
chr8	70527743	70529443	1701	+	-0.48568	5.35816	9.74111	0.00180192	NM_010223	ENSMUSG00000019428	Fkbp8	FK506 binding protein 8 [Source:MGI Symbol;Acc:MGI:1341070]
chr8	70527846	70529645	1800	+	-0.484827	5.36089	9.9137	0.00164053	NM_001199631	ENSMUSG00000019428	Fkbp8	FK506 binding protein 8 [Source:MGI Symbol;Acc:MGI:1341070]
chr8	70527743	70529446	1704	+	-0.478918	5.36045	9.59116	0.00195516	NM_001111066	ENSMUSG00000019428	Fkbp8	FK506 binding protein 8 [Source:MGI Symbol;Acc:MGI:1341070]
chr12	95692226	95699322	7097	+	-0.342994	5.90831	9.64048	0.00190336	NM_201518	ENSMUSG00000047414	Flrt2	fibronectin leucine rich transmembrane protein 2 [Source:MGI Symbol;Acc:MGI:3603594]
chr5	147330742	147334397	3656	+	-0.364361	6.5375	16.1405	5.88113e-05	NM_010229	ENSMUSG00000042817	Flt3	FMS-like tyrosine kinase 3 [Source:MGI Symbol;Acc:MGI:95559]
chr1	174501825	174508266	6442	+	0.794884	4.32346	13.4236	0.000248477	NM_019445	ENSMUSG00000028354	Fmn2	formin 2 [Source:MGI Symbol;Acc:MGI:1859252]
chr1	162793883	162795669	1787	+	1.08199	3.6991	19.2254	1.16157e-05	NM_144878	ENSMUSG00000026692	Fmo4	flavin containing monooxygenase 4 [Source:MGI Symbol;Acc:MGI:2429497]
chr3	97628838	97634122	5285	+	0.613042	4.40883	7.78972	0.00525444	NM_001161765	ENSMUSG00000028088	Fmo5	flavin containing monooxygenase 5 [Source:MGI Symbol;Acc:MGI:1310004]
chr3	97628838	97634023	5186	+	0.613042	4.40883	7.78972	0.00525444	NM_010232	ENSMUSG00000028088	Fmo5	flavin containing monooxygenase 5 [Source:MGI Symbol;Acc:MGI:1310004]
chr3	97628804	97634005	5202	+	0.617385	4.41118	7.91575	0.00490064	NM_001161763	ENSMUSG00000028088	Fmo5	flavin containing monooxygenase 5 [Source:MGI Symbol;Acc:MGI:1310004]
chr2	31053235	31055213	1979	+	-0.384278	5.93163	9.28953	0.00230467	NM_019406	ENSMUSG00000075415	Fnbp1	formin binding protein 1 [Source:MGI Symbol;Acc:MGI:109606]
chrX	106420043	106424854	4812	+	1.22346	3.0265	10.8284	0.000999554	NM_001007580	ENSMUSG00000033737	Fndc3c1	fibronectin type III domain containing 3C1 [Source:MGI Symbol;Acc:MGI:2685630]
chr11	54438179	54444459	6281	+	0.55147	4.69925	8.92595	0.00281148	NM_173753	ENSMUSG00000035992	Fnip1	folliculin interacting protein 1 [Source:MGI Symbol;Acc:MGI:2444668]
chr16	14299244	14300665	1422	+	0.964711	2.82644	9.98954	0.00157432	NM_025345	ENSMUSG00000022677	Fopnl	Fgfr1op N-terminal like [Source:MGI Symbol;Acc:MGI:1913336]
chr6	122820184	122825196	5013	+	0.393161	5.61729	10.6249	0.00111573	NM_021899	ENSMUSG00000003154	Foxj2	forkhead box J2 [Source:MGI Symbol;Acc:MGI:1926805]
chr12	99195094	99197704	2611	+	-0.388243	5.84215	8.53406	0.0034856	NM_183186	ENSMUSG00000033713	Foxn3	forkhead box N3 [Source:MGI Symbol;Acc:MGI:1918625]
chr4	82897920	82907443	9524	+	0.499057	6.28928	11.962	0.000542963	NM_001198811	ENSMUSG00000059049	Frem1	Fras1 related extracellular matrix protein 1 [Source:MGI Symbol;Acc:MGI:2670972]
chr4	82897927	82907233	9307	+	0.509002	6.28088	12.2612	0.00046247	NM_177863	ENSMUSG00000059049	Frem1	Fras1 related extracellular matrix protein 1 [Source:MGI Symbol;Acc:MGI:2670972]
chr3	53513938	53526285	12348	+	-0.212126	7.85523	6.9258	0.0084961	NM_172862	ENSMUSG00000037016	Frem2	Fras1 related extracellular matrix protein 2 [Source:MGI Symbol;Acc:MGI:2444465]
chrX	50892645	50897291	4647	+	1.04854	3.36942	16.8995	3.94115e-05	NM_001190332	ENSMUSG00000036131	Frmd7	FERM domain containing 7 [Source:MGI Symbol;Acc:MGI:2686379]
chrX	167471306	167479917	8612	+	0.779033	3.80177	11.4216	0.000725961	NM_001033330	ENSMUSG00000049176	Frmpd4	FERM and PDZ domain containing 4 [Source:MGI Symbol;Acc:MGI:3042378]
chr5	150259930	150270659	10730	+	-0.222487	8.32379	8.02555	0.00461221	NM_172887	ENSMUSG00000056602	Fry	furry homolog (Drosophila) [Source:MGI Symbol;Acc:MGI:2443895]
chr5	73020191	73031660	11470	+	-0.299586	8.82406	10.9618	0.000930071	NM_028194	ENSMUSG00000070733	Fryl	furry homolog-like (Drosophila) [Source:MGI Symbol;Acc:MGI:1919563]
chr3	152210458	152216948	6491	+	0.801733	4.06756	7.29217	0.00692557	NM_057172	ENSMUSG00000028034	Fubp1	far upstream element (FUSE) binding protein 1 [Source:MGI Symbol;Acc:MGI:1196294]
chr12	77238104	77241026	2923	+	0.665686	3.79661	12.9311	0.00032317	NM_016893	ENSMUSG00000021065	Fut8	fucosyltransferase 8 [Source:MGI Symbol;Acc:MGI:1858901]
chr12	77238104	77241115	3012	+	0.681597	3.81458	13.5215	0.000235843	NM_001252614	ENSMUSG00000021065	Fut8	fucosyltransferase 8 [Source:MGI Symbol;Acc:MGI:1858901]
chr12	77388864	77390949	2086	+	0.782752	3.6386	16.8145	4.12169e-05	NM_001252615	ENSMUSG00000021065	Fut8	fucosyltransferase 8 [Source:MGI Symbol;Acc:MGI:1858901]
chr6	117933559	117934109	551	+	1.38678	2.01174	13.3262	0.000261729	NM_001173372	ENSMUSG00000004988	Fxyd4	FXYD domain-containing ion transport regulator 4 [Source:MGI Symbol;Acc:MGI:1889005]
chr6	117933559	117934112	554	+	1.38678	2.01174	13.3262	0.000261729	NM_033648	ENSMUSG00000004988	Fxyd4	FXYD domain-containing ion transport regulator 4 [Source:MGI Symbol;Acc:MGI:1889005]
chr15	6579847	6584843	4997	+	0.394451	5.67332	14.9364	0.000111197	NM_011815	ENSMUSG00000022148	Fyb	FYN binding protein [Source:MGI Symbol;Acc:MGI:1346327]
chrX	169975043	169977422	2380	+	0.650263	4.58777	7.41415	0.0064713	NR_029457	ENSMUSG00000072844	G530011O06Rik	RIKEN cDNA G530011O06 gene [Source:MGI Symbol;Acc:MGI:3603513]
chr2	126639019	126640626	1608	+	0.66246	4.07386	7.41838	0.0064561	NM_001271470	ENSMUSG00000027361	Gabpb1	GA repeat binding protein, beta 1 [Source:MGI Symbol;Acc:MGI:95611]
chr2	126639019	126640464	1446	+	0.696493	4.03033	7.90947	0.00491766	NM_010249	ENSMUSG00000027361	Gabpb1	GA repeat binding protein, beta 1 [Source:MGI Symbol;Acc:MGI:95611]
chr2	126647748	126651001	3254	+	0.732863	4.00386	7.19343	0.00731711	NM_001271492	ENSMUSG00000027361	Gabpb1	GA repeat binding protein, beta 1 [Source:MGI Symbol;Acc:MGI:95611]
chrX	72257432	72260222	2791	+	-0.636791	3.90498	10.0105	0.00155648	NM_017369	ENSMUSG00000031340	Gabre	gamma-aminobutyric acid (GABA) A receptor, subunit epsilon [Source:MGI Symbol;Acc:MGI:1330235]
chr11	41910190	41914124	3935	+	0.898015	3.04001	9.28511	0.00231025	NM_008073	ENSMUSG00000020436	Gabrg2	gamma-aminobutyric acid (GABA) A receptor, subunit gamma 2 [Source:MGI Symbol;Acc:MGI:95623]
chr11	41910190	41914100	3911	+	0.921198	3.01512	9.44078	0.00212214	NM_177408	ENSMUSG00000020436	Gabrg2	gamma-aminobutyric acid (GABA) A receptor, subunit gamma 2 [Source:MGI Symbol;Acc:MGI:95623]
chr7	56724242	56725914	1673	+	1.40052	2.41129	10.2779	0.00134635	NM_008074	ENSMUSG00000055026	Gabrg3	gamma-aminobutyric acid (GABA) A receptor, subunit gamma 3 [Source:MGI Symbol;Acc:MGI:95624]
chr2	125859109	125861737	2629	+	0.639772	3.94876	11.4503	0.000714812	NM_175154	ENSMUSG00000027207	Galk2	galactokinase 2 [Source:MGI Symbol;Acc:MGI:1917226]
chr5	110544355	110547245	2891	+	-0.455133	6.32832	7.9551	0.0047952	NM_198306	ENSMUSG00000033316	Galnt9	UDP-N-acetyl-alpha-D-galactosamine:polypeptide N-acetylgalactosaminyltransferase 9 [Source:MGI Symbol;Acc:MGI:2677965]
chr18	82392496	82395366	2871	+	-0.389731	4.59293	7.98745	0.00471027	NM_008082	ENSMUSG00000024553	Galr1	galanin receptor 1 [Source:MGI Symbol;Acc:MGI:1096364]
chr10	80258151	80259094	944	+	1.00532	2.4939	8.35282	0.00385089	NM_010255	ENSMUSG00000020150	Gamt	guanidinoacetate methyltransferase [Source:MGI Symbol;Acc:MGI:1098221]
chr6	88198664	88201906	3243	+	0.557024	3.85984	8.50576	0.00354025	NM_008090	ENSMUSG00000015053	Gata2	GATA binding protein 2 [Source:MGI Symbol;Acc:MGI:95662]
chr2	180325088	180328389	3302	+	-0.423263	4.86408	7.54343	0.00602291	NM_008093	ENSMUSG00000015627	Gata5	GATA binding protein 5 [Source:MGI Symbol;Acc:MGI:109497]
chr5	3639961	3642507	2547	+	0.792185	3.34362	6.87052	0.00876293	NM_026033	ENSMUSG00000007415	Gatad1	GATA zinc finger domain containing 1 [Source:MGI Symbol;Acc:MGI:1914460]
chr5	105215699	105219226	3528	+	1.26956	2.52439	9.31233	0.00227617	NM_001039646	ENSMUSG00000054588	Gbp10	guanylate-binding protein 10 [Source:MGI Symbol;Acc:MGI:4359647]
chr3	142560052	142562690	2639	+	0.582504	3.63938	7.91048	0.00491491	NM_018734	ENSMUSG00000028268	Gbp3	guanylate binding protein 3 [Source:MGI Symbol;Acc:MGI:1926263]
chr2	62664327	62667614	3288	+	1.18984	3.62052	15.9442	6.52386e-05	NM_145523	ENSMUSG00000026893	Gca	grancalcin [Source:MGI Symbol;Acc:MGI:1918521]
chr13	40917634	40921638	4005	+	-0.391457	5.64278	9.57213	0.00197553	NM_133219	ENSMUSG00000021360	Gcnt2	glucosaminyl (N-acetyl) transferase 2, I-branching enzyme [Source:MGI Symbol;Acc:MGI:1100870]
chr13	40886758	40891122	4365	+	-0.337754	5.68303	7.91723	0.00489663	NM_008105	ENSMUSG00000021360	Gcnt2	glucosaminyl (N-acetyl) transferase 2, I-branching enzyme [Source:MGI Symbol;Acc:MGI:1100870]
chr13	40859768	40864110	4343	+	-0.301333	5.85204	7.74123	0.00539739	NM_023887	ENSMUSG00000021360	Gcnt2	glucosaminyl (N-acetyl) transferase 2, I-branching enzyme [Source:MGI Symbol;Acc:MGI:1100870]
chr16	45610440	45613803	3364	+	0.82972	2.67532	6.91896	0.00852864	NM_001159297	ENSMUSG00000022659	Gcsam	germinal center associated, signaling and motility [Source:MGI Symbol;Acc:MGI:102969]
chr4	9844372	9847903	3532	+	0.91185	3.18289	11.101	0.000862819	NM_013526	ENSMUSG00000051279	Gdf6	growth differentiation factor 6 [Source:MGI Symbol;Acc:MGI:95689]
chr15	7810048	7814524	4477	+	-0.373562	5.83188	8.99717	0.00270398	NM_010275	ENSMUSG00000022144	Gdnf	glial cell line derived neurotrophic factor [Source:MGI Symbol;Acc:MGI:107430]
chr4	11704447	11706703	2257	+	-0.477697	5.12459	13.0847	0.000297724	NM_010276	ENSMUSG00000028214	Gem	GTP binding protein (gene overexpressed in skeletal muscle) [Source:MGI Symbol;Acc:MGI:99844]
chr12	11240926	11244208	3283	+	0.700953	4.25405	13.3101	0.000263976	NM_177331	ENSMUSG00000051235	Gen1	Gen homolog 1, endonuclease (Drosophila) [Source:MGI Symbol;Acc:MGI:2443149]
chr3	67430115	67432712	2598	+	-0.318227	6.1632	11.3961	0.000736	NM_138591	ENSMUSG00000027774	Gfm1	G elongation factor, mitochondrial 1 [Source:MGI Symbol;Acc:MGI:107339]
chr2	131039632	131041084	1453	+	1.00314	2.27752	6.91324	0.00855598	NM_020014	ENSMUSG00000027316	Gfra4	glial cell line derived neurotrophic factor family receptor alpha 4 [Source:MGI Symbol;Acc:MGI:1341873]
chr2	131039632	131041017	1386	+	1.1216	2.24819	8.22697	0.00412723	NM_001271002	ENSMUSG00000027316	Gfra4	glial cell line derived neurotrophic factor family receptor alpha 4 [Source:MGI Symbol;Acc:MGI:1341873]
chr2	131039632	131041057	1426	+	1.25678	2.1011	9.41485	0.00215235	NM_001136063	ENSMUSG00000027316	Gfra4	glial cell line derived neurotrophic factor family receptor alpha 4 [Source:MGI Symbol;Acc:MGI:1341873]
chr2	131039632	131040990	1359	+	1.42497	2.06731	11.4103	0.000730368	NM_001271001	ENSMUSG00000027316	Gfra4	glial cell line derived neurotrophic factor family receptor alpha 4 [Source:MGI Symbol;Acc:MGI:1341873]
chr13	14052445	14054815	2371	+	0.926315	2.52997	8.02361	0.00461715	NM_010282	ENSMUSG00000021302	Ggps1	geranylgeranyl diphosphate synthase 1 [Source:MGI Symbol;Acc:MGI:1341724]
chr14	37120445	37123349	2905	+	0.808835	2.89917	7.09048	0.00774947	NM_078478	ENSMUSG00000041028	Ghitm	growth hormone inducible transmembrane protein [Source:MGI Symbol;Acc:MGI:1913342]
chr14	37120445	37123396	2952	+	0.832702	2.9151	7.47068	0.00627118	NM_001199122	ENSMUSG00000041028	Ghitm	growth hormone inducible transmembrane protein [Source:MGI Symbol;Acc:MGI:1913342]
chr6	48764464	48766608	2145	+	0.70132	3.77527	12.4762	0.000412171	NM_031247	ENSMUSG00000039264	Gimap3	GTPase, IMAP family member 3 [Source:MGI Symbol;Acc:MGI:1932723]
chr6	48746197	48748139	1943	+	0.900267	2.90319	11.5661	0.000671649	NM_175035	ENSMUSG00000043505	Gimap5	GTPase, IMAP family member 5 [Source:MGI Symbol;Acc:MGI:2442232]
chr6	48647234	48650887	3654	+	0.751581	3.05225	8.70988	0.00316491	NM_001077410	ENSMUSG00000064262	Gimap8	GTPase, IMAP family member 8 [Source:MGI Symbol;Acc:MGI:2685303]
chr6	48647361	48651008	3648	+	0.769645	3.05997	9.27069	0.0023285	NM_212486	ENSMUSG00000064262	Gimap8	GTPase, IMAP family member 8 [Source:MGI Symbol;Acc:MGI:2685303]
chr10	7767947	7769503	1557	+	1.28335	2.29074	13.5958	0.000226695	NM_145418	ENSMUSG00000040006	Ginm1	glycoprotein integral membrane 1 [Source:MGI Symbol;Acc:MGI:2384905]
chr9	62057249	62061873	4625	+	0.940544	3.84379	9.08799	0.00257294	NM_033320	ENSMUSG00000032252	Glce	glucuronyl C5-epimerase [Source:MGI Symbol;Acc:MGI:2136405]
chr10	112060189	112061084	896	+	1.31762	2.30975	13.8211	0.000201064	NM_027018	ENSMUSG00000020213	Glipr1l1	GLI pathogenesis-related 1 like 1 [Source:MGI Symbol;Acc:MGI:1916536]
chr17	30592862	30593760	899	+	-0.384358	5.35405	8.24391	0.00408891	NM_001113560	ENSMUSG00000024026	Glo1	glyoxalase 1 [Source:MGI Symbol;Acc:MGI:95742]
chr17	30592862	30594800	1939	+	-0.376297	5.40417	8.2173	0.00414929	NM_025374	ENSMUSG00000024026	Glo1	glyoxalase 1 [Source:MGI Symbol;Acc:MGI:95742]
chrX	8004201	8004872	672	+	0.898307	2.45036	7.93826	0.00484004	NM_027227	ENSMUSG00000031163	Glod5	glyoxalase domain containing 5 [Source:MGI Symbol;Acc:MGI:1917074]
chr1	143739615	143743096	3482	+	0.690569	4.06677	7.35444	0.00668972	NM_023505	ENSMUSG00000018196	Glrx2	glutaredoxin 2 (thioltransferase) [Source:MGI Symbol;Acc:MGI:1916617]
chr1	143739568	143743170	3603	+	0.690569	4.06677	7.35444	0.00668972	NM_001038592	ENSMUSG00000018196	Glrx2	glutaredoxin 2 (thioltransferase) [Source:MGI Symbol;Acc:MGI:1916617]
chr1	143739349	143742854	3506	+	0.697027	4.07876	7.84923	0.00508423	NM_001038593	ENSMUSG00000018196	Glrx2	glutaredoxin 2 (thioltransferase) [Source:MGI Symbol;Acc:MGI:1916617]
chr7	137437648	137439298	1651	+	0.593325	4.04025	9.70607	0.00183661	NM_023140	ENSMUSG00000031068	Glrx3	glutaredoxin 3 [Source:MGI Symbol;Acc:MGI:1353653]
chr17	25901856	25902227	372	+	-0.567777	4.03696	7.52548	0.00608323	NR_028042	ENSMUSG00000057580	Gm10012	predicted pseudogene 10012 [Source:MGI Symbol;Acc:MGI:3642454]
chr14	23038195	23040924	2730	+	1.32985	2.8613	10.4445	0.00123018	NR_033550	ENSMUSG00000068680	Gm10248	predicted gene 10248 [Source:MGI Symbol;Acc:MGI:3641931]
chrX	149594601	149596403	1803	+	1.03373	2.07445	7.44517	0.00636068	NM_001037716	ENSMUSG00000072923	Gm10439	predicted gene 10439 [Source:MGI Symbol;Acc:MGI:3710525]
chr4	73605544	73609263	3720	+	-0.275442	5.37454	7.82773	0.00514507	NM_001277531	ENSMUSG00000096700	Gm11236	predicted gene 11236 [Source:MGI Symbol;Acc:MGI:3702277]
chr1	63114471	63116051	1581	+	1.026	2.00654	7.26624	0.00702627	NR_045915	ENSMUSG00000084799	Gm11602	predicted gene 11602 [Source:MGI Symbol;Acc:MGI:3651861]
chr11	4625376	4626135	760	+	1.13199	1.95619	7.12827	0.0075878	NR_027797	ENSMUSG00000056288	Gm11961	predicted gene 11961 [Source:MGI Symbol;Acc:MGI:3652303]
chr11	6716001	6716664	664	+	1.00812	2.35227	8.72329	0.00314171	NR_046025	ENSMUSG00000086808	Gm11981	predicted gene 11981 [Source:MGI Symbol;Acc:MGI:3650697]
chr7	137437674	137438684	1011	+	0.599637	3.65357	7.12918	0.00758396	NR_033611	ENSMUSG00000049494	Gm12669	predicted gene 12669 [Source:MGI Symbol;Acc:MGI:3651683]
chr4	96723887	96725524	1638	+	1.07919	2.51688	8.87943	0.00288401	NM_001081284	ENSMUSG00000078639	Gm12695	predicted gene 12695 [Source:MGI Symbol;Acc:MGI:3650206]
chr3	95878505	95879899	1395	+	0.64097	3.33803	7.06577	0.00785707	NM_001033302	ENSMUSG00000038550	Gm129	predicted gene 129 [Source:MGI Symbol;Acc:MGI:2684975]
chr4	88757844	88758392	549	+	-0.674122	2.99365	7.2199	0.00720998	NM_001243150	ENSMUSG00000095101	Gm13285	predicted gene 13285 [Source:MGI Symbol;Acc:MGI:3701981]
chr4	88773994	88779483	5490	+	-0.36115	6.06803	7.86514	0.0050397	NM_001161609	ENSMUSG00000095101	Gm13285	predicted gene 13285 [Source:MGI Symbol;Acc:MGI:3701981]
chr4	88773834	88776737	2904	+	-0.424875	5.76964	8.28024	0.00400789	NM_001243165	ENSMUSG00000096582	Gm13289	predicted gene 13289 [Source:MGI Symbol;Acc:MGI:3701987]
chr4	88773834	88776737	2904	+	-0.424875	5.76964	8.28024	0.00400789	NM_001243155	ENSMUSG00000094271	Gm13290	predicted gene 13290 [Source:MGI Symbol;Acc:MGI:3701990]
chr2	51241831	51243868	2038	+	0.534088	3.75148	7.89706	0.00495151	NR_040636	ENSMUSG00000086349	Gm13497	predicted gene 13497 [Source:MGI Symbol;Acc:MGI:3650384]
chr2	60411525	60412085	561	+	1.05195	2.05568	7.29452	0.00691654	NR_046065	ENSMUSG00000087283	Gm13580	predicted gene 13580 [Source:MGI Symbol;Acc:MGI:3650460]
chr2	109902396	109903744	1349	+	0.626486	3.42912	8.22789	0.00412514	NR_033473	ENSMUSG00000063751	Gm13939	predicted gene 13939 [Source:MGI Symbol;Acc:MGI:3652122]
chr2	128298663	128301459	2797	+	0.707865	2.93579	7.0056	0.00812553	NR_028589	ENSMUSG00000074813	Gm14005	predicted gene 14005 [Source:MGI Symbol;Acc:MGI:3652191]
chr2	128316300	128318135	1836	+	0.959089	2.6064	10.7882	0.00102148	NR_028590	ENSMUSG00000074813	Gm14005	predicted gene 14005 [Source:MGI Symbol;Acc:MGI:3652191]
chr2	176708353	176709973	1621	+	0.929288	2.57632	8.34299	0.00387177	NM_001099327	ENSMUSG00000078878	Gm14305	predicted gene 14305 [Source:MGI Symbol;Acc:MGI:3709632]
chr2	175061549	175062179	631	+	2.19093	1.47884	15.5411	8.07312e-05	NM_001085546	ENSMUSG00000078905	Gm14393	predicted gene 14393 [Source:MGI Symbol;Acc:MGI:3649576]
chrX	11299321	11301546	2226	+	-0.57104	5.85764	13.6254	0.00022315	NM_001242954	ENSMUSG00000095445	Gm14475	predicted gene 14475 [Source:MGI Symbol;Acc:MGI:3710416]
chrX	11299321	11301546	2226	+	-0.57104	5.85764	13.6254	0.00022315	NM_001242950	ENSMUSG00000094904	Gm14476	predicted gene 14476 [Source:MGI Symbol;Acc:MGI:3710419]
chrX	11299321	11301546	2226	+	-0.57104	5.85764	13.6254	0.00022315	NM_001242949	ENSMUSG00000096097	Gm14477	predicted gene 14477 [Source:MGI Symbol;Acc:MGI:3711280]
chrX	11318286	11319169	884	+	-0.602816	4.19455	10.2182	0.00139062	NM_001242953	ENSMUSG00000095810	Gm14478	predicted gene 14478 [Source:MGI Symbol;Acc:MGI:3711282]
chrX	11299321	11301546	2226	+	-0.57104	5.85764	13.6254	0.00022315	NM_001242951	ENSMUSG00000095655	Gm14479	predicted gene 14479 [Source:MGI Symbol;Acc:MGI:3649874]
chrX	11308755	11310790	2036	+	-0.59991	5.20196	11.643	0.000644463	NM_001242952	ENSMUSG00000095662	Gm14482	predicted gene 14482 [Source:MGI Symbol;Acc:MGI:3710577]
chrX	11299257	11300258	1002	+	-0.597245	4.19996	9.68487	0.00185792	NM_001111037	ENSMUSG00000095208	Gm14483	predicted gene 14483 [Source:MGI Symbol;Acc:MGI:3714114]
chrX	12339779	12341190	1412	+	1.00345	2.25305	8.93267	0.00280115	NR_045321	ENSMUSG00000087591	Gm14635	predicted gene 14635 [Source:MGI Symbol;Acc:MGI:3705138]
chr16	20545112	20548556	3445	+	0.781446	3.1996	11.3499	0.000754504	NR_030670	ENSMUSG00000080797	Gm15760	predicted gene 15760 [Source:MGI Symbol;Acc:MGI:3642834]
chr18	80206798	80208480	1683	+	-0.492006	5.20412	7.49682	0.00618081	NM_001038608	ENSMUSG00000024571	Gm16286	predicted gene 16286 [Source:MGI Symbol;Acc:MGI:3833940]
chr18	80206867	80208525	1659	+	-0.492006	5.20412	7.49682	0.00618081	NM_001042408	ENSMUSG00000024571	Gm16286	predicted gene 16286 [Source:MGI Symbol;Acc:MGI:3833940]
chr18	80206846	80208640	1795	+	-0.488652	5.2054	7.35966	0.00667034	NM_178604	ENSMUSG00000024571	Gm16286	predicted gene 16286 [Source:MGI Symbol;Acc:MGI:3833940]
chr15	79742698	79748101	5404	+	0.819071	3.65204	9.74262	0.00180044	NR_045069	ENSMUSG00000087543	Gm16576	predicted gene 16576 [Source:MGI Symbol;Acc:MGI:4414996]
chr14	56696275	56698445	2171	+	1.03266	2.72617	10.0136	0.00155393	NR_046209	ENSMUSG00000097743	Gm16973	predicted gene, 16973 [Source:MGI Symbol;Acc:MGI:4439897]
chr14	56696275	56698377	2103	+	1.03266	2.72617	10.0136	0.00155393	NR_046210	ENSMUSG00000097743	Gm16973	predicted gene, 16973 [Source:MGI Symbol;Acc:MGI:4439897]
chr17	94759942	94761796	1855	+	1.48837	2.47835	15.1202	0.000100876	NR_045964	ENSMUSG00000066057	Gm1976	predicted gene 1976 [Source:MGI Symbol;Acc:MGI:3780145]
chr9	124474346	124476862	2517	+	-0.411022	5.45157	10.5122	0.00118588	NM_011154	ENSMUSG00000095352	Gm20783	predicted gene, 20783 [Source:MGI Symbol;Acc:MGI:5434139]
chr13	119488039	119489850	1812	+	-0.283685	8.50052	8.81909	0.00298095	NM_001039244	ENSMUSG00000094114	Gm21967	predicted gene, 21967 [Source:MGI Symbol;Acc:MGI:5439436]
chr7	99260481	99261937	1457	+	1.04565	2.94012	14.4537	0.000143647	NR_103487	ENSMUSG00000097015	Gm26705	predicted gene, 26705 [Source:MGI Symbol;Acc:MGI:5477199]
chr11	55097985	55102240	4256	+	0.680962	3.68271	8.56863	0.00342005	NM_010299	ENSMUSG00000000594	Gm2a	GM2 ganglioside activator protein [Source:MGI Symbol;Acc:MGI:95762]
chr17	33215261	33216351	1091	+	1.06342	1.90434	7.10456	0.00768881	NM_001199062	ENSMUSG00000096169	Gm4461	predicted gene 4461 [Source:MGI Symbol;Acc:MGI:3782645]
chr1	166628971	166631982	3012	+	1.14297	2.60575	8.30031	0.00396383	NM_001164312	ENSMUSG00000051081	Gm4847	predicted gene 4847 [Source:MGI Symbol;Acc:MGI:3643320]
chr10	58234848	58236660	1813	+	0.954686	2.95875	13.889	0.000193933	NM_001034869	ENSMUSG00000075045	Gm4981	predicted gene 4981 [Source:MGI Symbol;Acc:MGI:3645498]
chr12	64917911	64919373	1463	+	1.09067	2.46088	8.39357	0.00376551	NM_001025605	ENSMUSG00000047227	Gm527	predicted gene 527 [Source:MGI Symbol;Acc:MGI:2685373]
chrX	14211148	14211657	510	+	-0.81715	3.1952	11.821	0.000585655	NM_001034100	ENSMUSG00000061065	Gm5382	predicted gene 5382 [Source:MGI Symbol;Acc:MGI:3643774]
chr11	48887422	48890392	2971	+	1.07447	2.87914	8.95026	0.00277429	NM_001024230	ENSMUSG00000058163	Gm5431	predicted gene 5431 [Source:MGI Symbol;Acc:MGI:3645205]
chr5	72581639	72583018	1380	+	-0.38671	5.09976	7.9696	0.00475696	NM_001024147	ENSMUSG00000060204	Gm5868	predicted gene 5868 [Source:MGI Symbol;Acc:MGI:3645333]
chr13	119488860	119489770	911	+	-0.327681	8.46199	7.53208	0.00606099	NM_001177666	ENSMUSG00000074634	Gm7120	predicted gene 7120 [Source:MGI Symbol;Acc:MGI:3648543]
chr17	35617923	35623153	5231	+	1.10068	3.13391	13.9959	0.000183207	NM_001244654	ENSMUSG00000090588	Gm9573	predicted gene 9573 [Source:MGI Symbol;Acc:MGI:3779983]
chr14	46808149	46812319	4171	+	0.489047	4.22138	8.27891	0.00401082	NM_022023	ENSMUSG00000062014	Gmfb	glia maturation factor, beta [Source:MGI Symbol;Acc:MGI:1927133]
chr13	24751845	24752821	977	+	-0.562804	4.91505	14.6624	0.000128589	NM_020567	ENSMUSG00000006715	Gmnn	geminin [Source:MGI Symbol;Acc:MGI:1927344]
chr9	107614138	107616314	2177	+	-0.319478	5.5918	7.62901	0.00574368	NM_008138	ENSMUSG00000032562	Gnai2	guanine nucleotide binding protein (G protein), alpha inhibiting 2 [Source:MGI Symbol;Acc:MGI:95772]
chr19	16132831	16138464	5634	+	-0.343609	5.772	8.52404	0.00350485	NM_008139	ENSMUSG00000024639	Gnaq	guanine nucleotide binding protein, alpha q polypeptide [Source:MGI Symbol;Acc:MGI:95776]
chr2	174284320	174285964	1645	+	-0.706829	5.02855	8.19969	0.00418976	NM_019690	ENSMUSG00000027523	Gnas	GNAS (guanine nucleotide binding protein, alpha stimulating) complex locus [Source:MGI Symbol;Acc:MGI:95777]
chr10	74967231	74969665	2435	+	-0.488032	6.05099	6.9214	0.00851703	NM_010311	ENSMUSG00000040009	Gnaz	guanine nucleotide binding protein, alpha z subunit [Source:MGI Symbol;Acc:MGI:95780]
chr5	137528129	137529705	1577	+	-0.482094	5.028	10.1321	0.00145711	NM_010312	ENSMUSG00000029713	Gnb2	guanine nucleotide binding protein (G protein), beta 2 [Source:MGI Symbol;Acc:MGI:95784]
chr4	44036823	44039640	2818	+	-0.403281	6.70661	8.19242	0.00420658	NM_001190414	ENSMUSG00000028479	Gne	glucosamine (UDP-N-acetyl)-2-epimerase/N-acetylmannosamine kinase [Source:MGI Symbol;Acc:MGI:1354951]
chr4	44034075	44039458	5384	+	-0.323382	6.93095	7.39424	0.00654329	NM_015828	ENSMUSG00000028479	Gne	glucosamine (UDP-N-acetyl)-2-epimerase/N-acetylmannosamine kinase [Source:MGI Symbol;Acc:MGI:1354951]
chr13	13784539	13787506	2968	+	0.952155	2.87684	8.21411	0.00415659	NM_010317	ENSMUSG00000021303	Gng4	guanine nucleotide binding protein (G protein), gamma 4 [Source:MGI Symbol;Acc:MGI:102703]
chr6	3994012	3994974	963	+	1.06402	2.3692	8.04774	0.00455604	NM_010314	ENSMUSG00000029663	Gngt1	guanine nucleotide binding protein (G protein), gamma transducing activity polypeptide 1 [Source:MGI Symbol;Acc:MGI:109165]
chrX	150983133	150987976	4844	+	0.499252	4.1364	8.43457	0.00368155	NM_001168600	ENSMUSG00000025266	Gnl3l	guanine nucleotide binding protein-like 3 (nucleolar)-like [Source:MGI Symbol;Acc:MGI:2448557]
chrX	150983133	150988009	4877	+	0.499252	4.1364	8.43457	0.00368155	NM_198110	ENSMUSG00000025266	Gnl3l	guanine nucleotide binding protein-like 3 (nucleolar)-like [Source:MGI Symbol;Acc:MGI:2448557]
chr5	69575002	69576839	1838	+	0.674379	3.58928	8.30749	0.00394818	NM_001038015	ENSMUSG00000029209	Gnpda2	glucosamine-6-phosphate deaminase 2 [Source:MGI Symbol;Acc:MGI:1915230]
chr19	43499753	43501809	2057	+	-0.295365	6.36955	9.10752	0.00254561	NM_010324	ENSMUSG00000025190	Got1	glutamate oxaloacetate transaminase 1, soluble [Source:MGI Symbol;Acc:MGI:95791]
chr8	27197459	27198814	1356	+	0.736658	3.77378	13.6794	0.000216825	NM_029674	ENSMUSG00000039720	Got1l1	glutamic-oxaloacetic transaminase 1-like 1 [Source:MGI Symbol;Acc:MGI:1923865]
chr8	95864137	95866481	2345	+	-0.2571	6.44464	8.36746	0.00381998	NM_010325	ENSMUSG00000031672	Got2	glutamate oxaloacetate transaminase 2, mitochondrial [Source:MGI Symbol;Acc:MGI:95792]
chr19	55069734	55073561	3828	+	-0.313959	6.85575	9.54645	0.00200336	NM_008149	ENSMUSG00000024978	Gpam	glycerol-3-phosphate acyltransferase, mitochondrial [Source:MGI Symbol;Acc:MGI:109162]
chr2	132529082	132532782	3701	+	0.848879	3.68584	7.81432	0.00518339	NM_028802	ENSMUSG00000027346	Gpcpd1	glycerophosphocholine phosphodiesterase GDE1 homolog (S. cerevisiae) [Source:MGI Symbol;Acc:MGI:104898]
chr2	132532725	132536116	3392	+	1.26523	3.20255	10.9783	0.000921837	NM_001042672	ENSMUSG00000027346	Gpcpd1	glycerophosphocholine phosphodiesterase GDE1 homolog (S. cerevisiae) [Source:MGI Symbol;Acc:MGI:104898]
chr12	75411720	75413333	1614	+	1.20842	2.73614	13.3711	0.000255536	NM_175644	ENSMUSG00000048982	Gphb5	glycoprotein hormone beta 5 [Source:MGI Symbol;Acc:MGI:2156540]
chr12	78226655	78229954	3300	+	0.620243	3.87978	8.45843	0.00363356	NM_145965	ENSMUSG00000047454	Gphn	gephyrin [Source:MGI Symbol;Acc:MGI:109602]
chr12	78226655	78229945	3291	+	0.652197	3.99731	8.58916	0.0033817	NM_172952	ENSMUSG00000047454	Gphn	gephyrin [Source:MGI Symbol;Acc:MGI:109602]
chr8	94923694	94926513	2820	+	0.433889	4.46643	7.87762	0.00500503	NM_001145972	ENSMUSG00000061577	Gpr114	G protein-coupled receptor 114 [Source:MGI Symbol;Acc:MGI:2685955]
chr8	94923694	94926505	2812	+	0.433889	4.46643	7.87762	0.00500503	NM_001033468	ENSMUSG00000061577	Gpr114	G protein-coupled receptor 114 [Source:MGI Symbol;Acc:MGI:2685955]
chr5	49959951	49964425	4475	+	-0.354109	6.86002	11.0213	0.00090072	NM_133911	ENSMUSG00000029090	Gpr125	G protein-coupled receptor 125 [Source:MGI Symbol;Acc:MGI:1917943]
chr12	72069618	72070991	1374	+	0.986087	2.4414	9.72556	0.00181723	NM_181752	ENSMUSG00000043398	Gpr135	G protein-coupled receptor 135 [Source:MGI Symbol;Acc:MGI:2676315]
chr13	76054851	76056996	2146	+	1.03859	2.44259	10.3336	0.00130627	NM_175495	ENSMUSG00000045509	Gpr150	G protein-coupled receptor 150 [Source:MGI Symbol;Acc:MGI:2441872]
chr2	73341506	73346390	4885	+	-0.320585	5.80608	10.9777	0.000922152	NM_001276444	ENSMUSG00000041762	Gpr155	G protein-coupled receptor 155 [Source:MGI Symbol;Acc:MGI:1915776]
chr2	73341506	73346474	4969	+	-0.27419	5.8478	9.02286	0.00266625	NM_001190297	ENSMUSG00000041762	Gpr155	G protein-coupled receptor 155 [Source:MGI Symbol;Acc:MGI:1915776]
chr2	118277098	118281008	3911	+	0.671399	4.05693	7.29869	0.0069005	NM_201367	ENSMUSG00000040133	Gpr176	G protein-coupled receptor 176 [Source:MGI Symbol;Acc:MGI:2685858]
chr14	118137127	118140003	2877	+	-0.450574	6.50752	8.91725	0.0028249	NM_021434	ENSMUSG00000022131	Gpr180	G protein-coupled receptor 180 [Source:MGI Symbol;Acc:MGI:1930949]
chr6	134869092	134870675	1584	+	-0.55444	5.58148	13.2875	0.000267175	NM_008157	ENSMUSG00000032641	Gpr19	G protein-coupled receptor 19 [Source:MGI Symbol;Acc:MGI:892973]
chr6	134869092	134870714	1623	+	-0.552954	5.59197	14.0181	0.00018106	NM_001167699	ENSMUSG00000032641	Gpr19	G protein-coupled receptor 19 [Source:MGI Symbol;Acc:MGI:892973]
chr6	134869092	134870832	1741	+	-0.54276	5.5993	13.6466	0.000220639	NM_001167697	ENSMUSG00000032641	Gpr19	G protein-coupled receptor 19 [Source:MGI Symbol;Acc:MGI:892973]
chr6	134869092	134870784	1693	+	-0.541522	5.59772	13.6528	0.000219918	NM_001167694	ENSMUSG00000032641	Gpr19	G protein-coupled receptor 19 [Source:MGI Symbol;Acc:MGI:892973]
chr6	134869092	134870745	1654	+	-0.540748	5.5883	12.7203	0.000361713	NM_001167696	ENSMUSG00000032641	Gpr19	G protein-coupled receptor 19 [Source:MGI Symbol;Acc:MGI:892973]
chr6	134869092	134870715	1624	+	-0.540748	5.5883	12.7203	0.000361713	NM_001167695	ENSMUSG00000032641	Gpr19	G protein-coupled receptor 19 [Source:MGI Symbol;Acc:MGI:892973]
chr6	134869092	134870934	1843	+	-0.53957	5.59248	13.1029	0.000294833	NM_001167700	ENSMUSG00000032641	Gpr19	G protein-coupled receptor 19 [Source:MGI Symbol;Acc:MGI:892973]
chr12	52023004	52024390	1387	+	0.964006	2.48241	7.19509	0.00731033	NM_008159	ENSMUSG00000035148	Gpr33	G protein-coupled receptor 33 [Source:MGI Symbol;Acc:MGI:1277106]
chr12	98268635	98270781	2147	+	-0.413367	5.33931	8.73975	0.00311347	NM_008152	ENSMUSG00000021886	Gpr65	G-protein coupled receptor 65 [Source:MGI Symbol;Acc:MGI:108031]
chr6	13835074	13838024	2951	+	0.888957	3.27019	14.0944	0.00017386	NM_145066	ENSMUSG00000048216	Gpr85	G protein-coupled receptor 85 [Source:MGI Symbol;Acc:MGI:1927851]
chr3	59178923	59180085	1163	+	-0.522659	4.99878	7.18147	0.00736605	NM_032399	ENSMUSG00000051431	Gpr87	G protein-coupled receptor 87 [Source:MGI Symbol;Acc:MGI:1934133]
chr6	135065662	135067732	2071	+	-0.378244	5.68762	10.1686	0.00142854	NM_181444	ENSMUSG00000046733	Gprc5a	G protein-coupled receptor, family C, group 5, member A [Source:MGI Symbol;Acc:MGI:1891250]
chr18	10325179	10333599	8421	+	0.315299	5.98832	12.1978	0.00047847	NM_001083628	ENSMUSG00000042942	Greb1l	growth regulation by estrogen in breast cancer-like [Source:MGI Symbol;Acc:MGI:3576497]
chr6	63256857	63259880	3024	+	0.531916	4.60642	12.6061	0.000384495	NM_008167	ENSMUSG00000071424	Grid2	glutamate receptor, ionotropic, delta 2 [Source:MGI Symbol;Acc:MGI:95813]
chr10	119454034	119459113	5080	+	-0.243256	6.75341	8.83259	0.00295898	NM_133442	ENSMUSG00000034813	Grip1	glutamate receptor interacting protein 1 [Source:MGI Symbol;Acc:MGI:1921303]
chr10	119819389	119824325	4937	+	-0.241296	6.75537	8.85485	0.0029231	NM_130891	ENSMUSG00000034813	Grip1	glutamate receptor interacting protein 1 [Source:MGI Symbol;Acc:MGI:1921303]
chr10	119454034	119459194	5161	+	-0.237537	6.76637	8.67602	0.00322424	NM_001277292	ENSMUSG00000034813	Grip1	glutamate receptor interacting protein 1 [Source:MGI Symbol;Acc:MGI:1921303]
chr10	119819389	119824406	5018	+	-0.23558	6.76831	8.68846	0.00320231	NM_001277294	ENSMUSG00000034813	Grip1	glutamate receptor interacting protein 1 [Source:MGI Symbol;Acc:MGI:1921303]
chr10	119819389	119824607	5219	+	-0.215112	6.87663	7.68565	0.00556616	NM_028736	ENSMUSG00000034813	Grip1	glutamate receptor interacting protein 1 [Source:MGI Symbol;Acc:MGI:1921303]
chr5	36465185	36468522	3338	+	0.707443	3.28325	9.00207	0.00269674	NM_024478	ENSMUSG00000029198	Grpel1	GrpE-like 1, mitochondrial [Source:MGI Symbol;Acc:MGI:1334417]
chr5	88659233	88661657	2425	+	0.609707	4.475	11.8525	0.000575855	NM_001098476	ENSMUSG00000044221	Grsf1	G-rich RNA sequence binding factor 1 [Source:MGI Symbol;Acc:MGI:106479]
chr5	88659233	88661985	2753	+	0.613123	4.47345	12.0346	0.000522216	NM_178700	ENSMUSG00000044221	Grsf1	G-rich RNA sequence binding factor 1 [Source:MGI Symbol;Acc:MGI:106479]
chr5	21186267	21190011	3745	+	0.628676	5.00022	7.56665	0.00594581	NM_175437	ENSMUSG00000039934	Gsap	gamma-secretase activating protein [Source:MGI Symbol;Acc:MGI:2442259]
chr11	98646759	98648424	1666	+	0.833736	2.59047	8.05702	0.00453277	NM_029727	ENSMUSG00000017211	Gsdma2	gasdermin A2 [Source:MGI Symbol;Acc:MGI:1921490]
chr15	63824346	63826657	2312	+	0.997238	2.82585	9.59033	0.00195605	NM_001168274	ENSMUSG00000056293	Gsdmc2	gasdermin C2 [Source:MGI Symbol;Acc:MGI:2146102]
chr15	63824346	63826422	2077	+	1.0133	2.81991	9.94034	0.00161696	NM_177912	ENSMUSG00000056293	Gsdmc2	gasdermin C2 [Source:MGI Symbol;Acc:MGI:2146102]
chr15	63857725	63859866	2142	+	0.827155	3.02803	10.8785	0.000972887	NM_183194	ENSMUSG00000055827	Gsdmc3	gasdermin C3 [Source:MGI Symbol;Acc:MGI:3580656]
chr16	11216241	11223065	6825	+	0.957472	4.05511	13.2573	0.000271517	NM_146066	ENSMUSG00000062203	Gspt1	G1 to S phase transition 1 [Source:MGI Symbol;Acc:MGI:1316728]
chr16	11216241	11223062	6822	+	0.957472	4.05511	13.2573	0.000271517	NM_001130008	ENSMUSG00000062203	Gspt1	G1 to S phase transition 1 [Source:MGI Symbol;Acc:MGI:1316728]
chrX	94636069	94638561	2493	+	1.01334	2.33423	9.69974	0.00184294	NM_008179	ENSMUSG00000071723	Gspt2	G1 to S phase transition 2 [Source:MGI Symbol;Acc:MGI:1316727]
chr8	33653238	33655909	2672	+	-0.366096	6.2287	10.2755	0.00134807	NM_010344	ENSMUSG00000031584	Gsr	glutathione reductase [Source:MGI Symbol;Acc:MGI:95804]
chr9	78230669	78231529	861	+	1.0297	2.01703	7.31774	0.00682772	NM_008181	ENSMUSG00000074183	Gsta1	glutathione S-transferase, alpha 1 (Ya) [Source:MGI Symbol;Acc:MGI:1095417]
chr3	132982551	132985169	2619	+	0.497071	4.9342	9.03701	0.00264568	NM_026231	ENSMUSG00000028018	Gstcd	glutathione S-transferase, C-terminal domain containing [Source:MGI Symbol;Acc:MGI:1914803]
chr3	108012250	108013543	1294	+	0.846717	3.40416	14.627	0.000131021	NM_010358	ENSMUSG00000058135	Gstm1	glutathione S-transferase, mu 1 [Source:MGI Symbol;Acc:MGI:95860]
chr16	37509796	37512853	3058	+	0.548176	4.2945	10.517	0.00118284	NM_028812	ENSMUSG00000022828	Gtf2e1	general transcription factor II E, polypeptide 1 (alpha subunit) [Source:MGI Symbol;Acc:MGI:1921447]
chr7	46796094	46798838	2745	+	0.628455	3.8831	7.95772	0.00478828	NM_008186	ENSMUSG00000006599	Gtf2h1	general transcription factor II H, polypeptide 1 [Source:MGI Symbol;Acc:MGI:1277216]
chr5	134184038	134187505	3468	+	-0.361847	6.91222	7.20169	0.00728349	NM_053266	ENSMUSG00000015942	Gtf2ird2	GTF2I repeat domain containing 2 [Source:MGI Symbol;Acc:MGI:2149780]
chr1	54397581	54400585	3005	+	1.0658	3.43426	10.3081	0.00132445	NM_001033194	ENSMUSG00000041303	Gtf3c3	general transcription factor IIIC, polypeptide 3 [Source:MGI Symbol;Acc:MGI:2138383]
chr8	95420250	95421543	1294	+	-0.393953	4.75735	9.00503	0.00269237	NM_008187	ENSMUSG00000031796	Gtl3	gene trap locus 3 [Source:MGI Symbol;Acc:MGI:107428]
chr4	119656603	119657202	600	+	1.01586	2.51444	9.81322	0.00173261	NM_008191	ENSMUSG00000032978	Guca2b	guanylate cyclase activator 2b (retina) [Source:MGI Symbol;Acc:MGI:1270851]
chr5	69556942	69560919	3978	+	0.906798	3.89984	12.3959	0.000430268	NM_172711	ENSMUSG00000029208	Guf1	GUF1 GTPase homolog (S. cerevisiae) [Source:MGI Symbol;Acc:MGI:2140726]
chr11	59183855	59184789	935	+	-0.413891	4.59369	7.07487	0.00781724	NM_001159410	ENSMUSG00000020444	Guk1	guanylate kinase 1 [Source:MGI Symbol;Acc:MGI:95871]
chr3	20122084	20123804	1721	+	0.91372	2.48904	8.22027	0.00414251	NM_013755	ENSMUSG00000019528	Gyg	glycogenin [Source:MGI Symbol;Acc:MGI:1351614]
chrX	136927325	136928373	1049	+	-0.518524	4.6945	8.58037	0.00339807	NM_027067	ENSMUSG00000048155	H2bfm	H2B histone family, member M [Source:MGI Symbol;Acc:MGI:1916639]
chr17	34325675	34329054	3380	+	0.830179	2.63906	7.70477	0.00550752	NM_001033978	ENSMUSG00000067341	H2-Eb2	histocompatibility 2, class II antigen E beta2 [Source:MGI Symbol;Acc:MGI:95902]
chr17	36365004	36366595	1592	+	0.979801	2.21533	7.50804	0.00614242	NM_201608	ENSMUSG00000058124	H2-M10.3	histocompatibility 2, M region locus 10.3 [Source:MGI Symbol;Acc:MGI:1276524]
chr17	36185571	36187748	2178	+	1.01864	3.17084	15.1058	0.000101653	NM_008208	ENSMUSG00000054128	H2-T3	histocompatibility 2, T region locus 3 [Source:MGI Symbol;Acc:MGI:95959]
chr18	36783280	36786341	3062	+	0.553263	4.5224	10.0539	0.00152028	NM_080636	ENSMUSG00000019143	Hars2	histidyl-tRNA synthetase 2, mitochondrial (putative) [Source:MGI Symbol;Acc:MGI:1918041]
chr7	30653708	30655902	2195	+	0.515236	4.18217	6.97886	0.00824783	NM_027999	ENSMUSG00000078762	Haus5	HAUS augmin-like complex, subunit 5 [Source:MGI Symbol;Acc:MGI:1919159]
chr4	86581285	86584979	3695	+	1.18001	3.22352	14.9429	0.000110813	NM_173400	ENSMUSG00000038047	Haus6	HAUS augmin-like complex, subunit 6 [Source:MGI Symbol;Acc:MGI:1923389]
chr8	71251124	71252793	1670	+	1.03798	2.89593	13.5229	0.000235676	NM_001163042	ENSMUSG00000035439	Haus8	4HAUS augmin-like complex, subunit 8 [Source:MGI Symbol;Acc:MGI:1923728]
chr8	71251124	71252790	1667	+	1.03798	2.89593	13.5229	0.000235676	NM_029621	ENSMUSG00000035439	Haus8	4HAUS augmin-like complex, subunit 8 [Source:MGI Symbol;Acc:MGI:1923728]
chr10	82699007	82701392	2386	+	0.647032	4.21276	8.46405	0.00362234	NM_001081218	ENSMUSG00000020246	Hcfc2	host cell factor C2 [Source:MGI Symbol;Acc:MGI:1915183]
chr15	89123303	89125729	2427	+	0.654922	3.80937	8.77715	0.00305027	NR_028447	ENSMUSG00000062906	Hdac10	histone deacetylase 10 [Source:MGI Symbol;Acc:MGI:2158340]
chr15	89123303	89125718	2416	+	0.654922	3.80937	8.77715	0.00305027	NM_199198	ENSMUSG00000062906	Hdac10	histone deacetylase 10 [Source:MGI Symbol;Acc:MGI:2158340]
chr15	89123303	89126007	2705	+	0.67624	3.81775	9.55962	0.00198904	NR_028449	ENSMUSG00000062906	Hdac10	histone deacetylase 10 [Source:MGI Symbol;Acc:MGI:2158340]
chr12	34371497	34375924	4428	+	0.922228	3.81322	9.1554	0.00247985	NM_024124	ENSMUSG00000004698	Hdac9	histone deacetylase 9 [Source:MGI Symbol;Acc:MGI:1931221]
chr18	76944115	76945830	1716	+	0.538629	3.88395	7.10533	0.00768549	NM_001039202	ENSMUSG00000025421	Hdhd2	haloacid dehalogenase-like hydrolase domain containing 2 [Source:MGI Symbol;Acc:MGI:1924237]
chr18	76944115	76946432	2318	+	0.673115	4.51355	14.2988	0.000155962	NM_029826	ENSMUSG00000025421	Hdhd2	haloacid dehalogenase-like hydrolase domain containing 2 [Source:MGI Symbol;Acc:MGI:1924237]
chr18	76944418	76946774	2357	+	0.684645	4.50895	14.6632	0.00012853	NM_001039201	ENSMUSG00000025421	Hdhd2	haloacid dehalogenase-like hydrolase domain containing 2 [Source:MGI Symbol;Acc:MGI:1924237]
chr13	14226438	14235897	9460	+	0.464342	5.26517	8.51444	0.00352338	NM_001081348	ENSMUSG00000021301	Hecw1	HECT, C2 and WW domain containing E3 ubiquitin protein ligase 1 [Source:MGI Symbol;Acc:MGI:2444115]
chr6	57580992	57586270	5279	+	1.12164	3.39195	12.3905	0.000431527	NM_025992	ENSMUSG00000029798	Herc6	hect domain and RLD 6 [Source:MGI Symbol;Acc:MGI:1914388]
chr11	121204433	121206592	2160	+	0.491889	4.27348	9.13574	0.00250664	NM_001001333	ENSMUSG00000039307	Hexdc	hexosaminidase (glycosyl hydrolase family 20, catalytic domain) containing [Source:MGI Symbol;Acc:MGI:3605542]
chr11	121207643	121209607	1965	+	0.51412	4.26367	10.3501	0.00129465	NM_001146073	ENSMUSG00000039307	Hexdc	hexosaminidase (glycosyl hydrolase family 20, catalytic domain) containing [Source:MGI Symbol;Acc:MGI:3605542]
chr5	106840197	106845214	5018	+	0.97038	3.70034	9.34833	0.00223189	NM_177873	ENSMUSG00000043410	Hfm1	HFM1, ATP-dependent DNA helicase homolog (S. cerevisiae) [Source:MGI Symbol;Acc:MGI:3036246]
chr1	52845046	52846749	1704	+	0.64157	3.29777	7.38127	0.00659065	NM_146108	ENSMUSG00000041426	Hibch	3-hydroxyisobutyryl-Coenzyme A hydrolase [Source:MGI Symbol;Acc:MGI:1923792]
chr13	23933725	23934156	432	+	-0.623686	4.70652	10.4806	0.00120633	NM_175663	ENSMUSG00000050799	Hist1h2ba	histone cluster 1, H2ba [Source:MGI Symbol;Acc:MGI:2448375]
chr3	96221121	96223738	2618	+	1.24994	2.39937	12.0578	0.000515754	NM_178214	ENSMUSG00000068854	Hist2h2be	histone cluster 2, H2be [Source:MGI Symbol;Acc:MGI:2448415]
chr10	13966379	13976146	9768	+	-0.21727	7.33341	10.7371	0.00105007	NM_010437	ENSMUSG00000015501	Hivep2	human immunodeficiency virus type I enhancer binding protein 2 [Source:MGI Symbol;Acc:MGI:1338076]
chr10	62268855	62273011	4157	+	-0.407042	7.55428	9.37262	0.00220251	NM_001146100	ENSMUSG00000037012	Hk1	hexokinase 1 [Source:MGI Symbol;Acc:MGI:96103]
chr10	62268855	62272954	4100	+	-0.394912	7.57776	9.15335	0.00248264	NM_010438	ENSMUSG00000037012	Hk1	hexokinase 1 [Source:MGI Symbol;Acc:MGI:96103]
chr6	82725027	82730537	5511	+	-0.375419	7.26758	9.23743	0.00237118	NM_013820	ENSMUSG00000000628	Hk2	hexokinase 2 [Source:MGI Symbol;Acc:MGI:1315197]
chr9	44336348	44337885	1538	+	0.73889	3.4728	9.83806	0.00170938	NM_001110251	ENSMUSG00000032126	Hmbs	hydroxymethylbilane synthase [Source:MGI Symbol;Acc:MGI:96112]
chr9	44336348	44337943	1596	+	0.793441	3.42882	10.9539	0.000934074	NM_013551	ENSMUSG00000032126	Hmbs	hydroxymethylbilane synthase [Source:MGI Symbol;Acc:MGI:96112]
chr2	75659259	75664482	5224	+	0.824117	3.11016	6.94498	0.00840549	NM_146130	ENSMUSG00000059005	Hnrnpa3	heterogeneous nuclear ribonucleoprotein A3 [Source:MGI Symbol;Acc:MGI:1917171]
chr2	75659259	75664416	5158	+	0.851665	3.09989	7.46763	0.00628182	NM_053263	ENSMUSG00000059005	Hnrnpa3	heterogeneous nuclear ribonucleoprotein A3 [Source:MGI Symbol;Acc:MGI:1917171]
chr2	75659259	75661879	2621	+	0.942377	2.71467	8.94173	0.00278729	NM_198090	ENSMUSG00000059005	Hnrnpa3	heterogeneous nuclear ribonucleoprotein A3 [Source:MGI Symbol;Acc:MGI:1917171]
chr13	93304495	93309262	4768	+	0.670651	4.04968	9.82106	0.00172525	NM_001284189	ENSMUSG00000007617	Homer1	homer homolog 1 (Drosophila) [Source:MGI Symbol;Acc:MGI:1347345]
chr13	93308034	93312320	4287	+	0.683845	4.07992	8.31011	0.00394251	NM_152134	ENSMUSG00000007617	Homer1	homer homolog 1 (Drosophila) [Source:MGI Symbol;Acc:MGI:1347345]
chr13	93304495	93309298	4804	+	0.691057	4.11792	9.63018	0.00191406	NM_147176	ENSMUSG00000007617	Homer1	homer homolog 1 (Drosophila) [Source:MGI Symbol;Acc:MGI:1347345]
chr3	95559677	95561376	1700	+	-0.595085	3.97126	9.92169	0.00163343	NM_026489	ENSMUSG00000028109	Hormad1	HORMA domain containing 1 [Source:MGI Symbol;Acc:MGI:1915231]
chr6	52258853	52260165	1313	+	-0.774762	2.90274	7.28443	0.00695549	NM_008264	ENSMUSG00000038203	Hoxa13	homeobox A13 [Source:MGI Symbol;Acc:MGI:96173]
chr6	52189687	52191214	1528	+	-0.502966	4.27865	8.45052	0.00364938	NM_008265	ENSMUSG00000000942	Hoxa4	homeobox A4 [Source:MGI Symbol;Acc:MGI:96176]
chr2	74762980	74764841	1862	+	1.35987	1.99312	12.4508	0.000417822	NM_010467	ENSMUSG00000042448	Hoxd1	homeobox D1 [Source:MGI Symbol;Acc:MGI:96201]
chr13	54192129	54193708	1580	+	-0.45888	4.15186	7.51126	0.00613145	NM_008286	ENSMUSG00000034987	Hrh2	histamine receptor H2 [Source:MGI Symbol;Acc:MGI:108482]
chrX	51386637	51391428	4792	+	0.769468	2.94694	7.95474	0.00479615	NM_001077202	ENSMUSG00000062184	Hs6st2	heparan sulfate 6-O-sulfotransferase 2 [Source:MGI Symbol;Acc:MGI:1354959]
chr2	94032697	94034535	1839	+	0.758288	3.56052	7.45448	0.00632788	NM_019657	ENSMUSG00000027195	Hsd17b12	hydroxysteroid (17-beta) dehydrogenase 12 [Source:MGI Symbol;Acc:MGI:1926967]
chr8	72189668	72190892	1225	+	0.593919	3.17879	6.87167	0.00875726	NM_197944	ENSMUSG00000062007	Hsh2d	hematopoietic SH2 domain containing [Source:MGI Symbol;Acc:MGI:2676364]
chr17	34972703	34975117	2415	+	-0.457814	6.22108	7.73111	0.00542773	NM_013558	ENSMUSG00000007033	Hspa1l	heat shock protein 1-like [Source:MGI Symbol;Acc:MGI:96231]
chr11	53259814	53264453	4640	+	0.720714	4.73305	8.7167	0.00315308	NM_008300	ENSMUSG00000020361	Hspa4	heat shock protein 4 [Source:MGI Symbol;Acc:MGI:1342292]
chr18	34937415	34940456	3042	+	0.75446	3.44195	9.78096	0.00176328	NM_010481	ENSMUSG00000024359	Hspa9	heat shock protein 9 [Source:MGI Symbol;Acc:MGI:96245]
chr4	107253934	107254492	559	+	1.59606	1.80084	13.3373	0.000260182	NM_028394	ENSMUSG00000063172	Hspb11	heat shock protein family B (small), member 11 [Source:MGI Symbol;Acc:MGI:1920188]
chr4	136423524	136426430	2907	+	-0.508003	6.10318	10.7033	0.00106943	NM_008309	ENSMUSG00000070687	Htr1d	5-hydroxytryptamine (serotonin) receptor 1D [Source:MGI Symbol;Acc:MGI:96276]
chr18	62324204	62328860	4657	+	0.660269	3.54977	7.39667	0.00653447	NM_008313	ENSMUSG00000026322	Htr4	5 hydroxytryptamine (serotonin) receptor 4 [Source:MGI Symbol;Acc:MGI:109246]
chr5	34761740	34774958	13219	+	0.342972	6.36243	6.88871	0.00867419	NM_010414	ENSMUSG00000029104	Htt	huntingtin [Source:MGI Symbol;Acc:MGI:96067]
chr9	85687360	85693009	5650	+	0.614532	5.67069	7.15677	0.00746815	NM_001081282	ENSMUSG00000035941	Ibtk	inhibitor of Bruton agammaglobulinemia tyrosine kinase [Source:MGI Symbol;Acc:MGI:1918677]
chr1	60977914	60981168	3255	+	1.06532	3.1932	13.1681	0.000284761	NM_017480	ENSMUSG00000026009	Icos	inducible T cell co-stimulator [Source:MGI Symbol;Acc:MGI:1858745]
chr13	58157649	58159159	1511	+	-0.411322	5.45839	8.62059	0.00332385	NM_198004	ENSMUSG00000050002	Idnk	idnK gluconokinase homolog (E. coli) [Source:MGI Symbol;Acc:MGI:1922981]
chr12	103434189	103434956	768	+	0.646601	3.10895	7.20293	0.00727847	NM_194069	ENSMUSG00000064215	Ifi27	interferon, alpha-inducible protein 27 [Source:MGI Symbol;Acc:MGI:1277180]
chr12	103434189	103435106	918	+	0.668294	3.14397	7.91834	0.00489363	NM_194067	ENSMUSG00000064215	Ifi27	interferon, alpha-inducible protein 27 [Source:MGI Symbol;Acc:MGI:1277180]
chr12	103434189	103435076	888	+	0.670454	3.12969	7.99097	0.00470112	NM_194068	ENSMUSG00000064215	Ifi27	interferon, alpha-inducible protein 27 [Source:MGI Symbol;Acc:MGI:1277180]
chr12	103434189	103435241	1053	+	0.687814	3.1514	8.49196	0.00356719	NM_026790	ENSMUSG00000064215	Ifi27	interferon, alpha-inducible protein 27 [Source:MGI Symbol;Acc:MGI:1277180]
chr12	103434189	103435211	1023	+	0.689935	3.13718	8.5649	0.00342705	NM_194066	ENSMUSG00000064215	Ifi27	interferon, alpha-inducible protein 27 [Source:MGI Symbol;Acc:MGI:1277180]
chr19	34550694	34554642	3949	+	0.966188	2.90496	7.64815	0.00568305	NM_008332	ENSMUSG00000045932	Ifit2	interferon-induced protein with tetratricopeptide repeats 2 [Source:MGI Symbol;Acc:MGI:99449]
chr4	88879538	88880201	664	+	-0.671177	3.64901	9.94931	0.00160909	NM_177348	ENSMUSG00000045364	Ifne	interferon epsilon [Source:MGI Symbol;Acc:MGI:2667156]
chr9	44773009	44776345	3337	+	-0.468617	5.68208	14.3172	0.000154443	NM_023831	ENSMUSG00000002031	Ift46	intraflagellar transport 46 [Source:MGI Symbol;Acc:MGI:1923818]
chr7	67952257	67964234	11978	+	-0.315741	7.8752	10.3565	0.00129017	NM_010513	ENSMUSG00000005533	Igf1r	insulin-like growth factor I receptor [Source:MGI Symbol;Acc:MGI:96433]
chr3	59316735	59326818	10084	+	-0.24895	6.47711	7.25488	0.00707088	NM_001162884	ENSMUSG00000036334	Igsf10	immunoglobulin superfamily, member 10 [Source:MGI Symbol;Acc:MGI:1923481]
chr16	96361761	96363268	1508	+	0.656787	3.38388	8.54668	0.00346153	NM_001177886	ENSMUSG00000000159	Igsf5	immunoglobulin superfamily, member 5 [Source:MGI Symbol;Acc:MGI:1919308]
chr11	98464693	98468790	4098	+	-0.394272	6.06144	14.5519	0.000136348	NM_011771	ENSMUSG00000018168	Ikzf3	IKAROS family zinc finger 3 [Source:MGI Symbol;Acc:MGI:1342542]
chr8	82331624	82332908	1285	+	1.19614	2.34249	12.2458	0.000466303	NM_008357	ENSMUSG00000031712	Il15	interleukin 15 [Source:MGI Symbol;Acc:MGI:103014]
chr8	82331624	82332898	1275	+	1.19614	2.34249	12.2458	0.000466303	NM_001254747	ENSMUSG00000031712	Il15	interleukin 15 [Source:MGI Symbol;Acc:MGI:103014]
chr14	57524829	57526050	1222	+	-0.629865	4.55928	7.58507	0.00588538	NM_145837	ENSMUSG00000050222	Il17d	interleukin 17D [Source:MGI Symbol;Acc:MGI:2446510]
chr9	50565368	50566233	866	+	0.89322	3.20395	13.7867	0.000204779	NM_008360	ENSMUSG00000039217	Il18	interleukin 18 [Source:MGI Symbol;Acc:MGI:107936]
chr7	102015077	102016478	1402	+	1.26753	1.8531	9.40955	0.00215858	NM_010531	ENSMUSG00000070427	Il18bp	interleukin 18 binding protein [Source:MGI Symbol;Acc:MGI:1333800]
chr1	40465621	40467413	1793	+	0.93312	3.06773	7.20799	0.00725796	NM_001161843	ENSMUSG00000026070	Il18r1	interleukin 18 receptor 1 [Source:MGI Symbol;Acc:MGI:105383]
chr1	40465552	40467470	1919	+	0.98426	3.08142	7.77331	0.00530237	NM_001161842	ENSMUSG00000026070	Il18r1	interleukin 18 receptor 1 [Source:MGI Symbol;Acc:MGI:105383]
chr1	40439629	40442699	3071	+	0.796884	3.30698	8.69448	0.00319176	NM_010743	ENSMUSG00000026069	Il1rl1	interleukin 1 receptor-like 1 [Source:MGI Symbol;Acc:MGI:98427]
chr7	125603429	125606035	2607	+	0.548702	3.43116	7.28177	0.0069658	NM_021887	ENSMUSG00000030745	Il21r	interleukin 21 receptor [Source:MGI Symbol;Acc:MGI:1890475]
chr15	78480549	78483244	2696	+	0.959529	3.54524	15.7881	7.08469e-05	NM_008368	ENSMUSG00000068227	Il2rb	interleukin 2 receptor, beta chain [Source:MGI Symbol;Acc:MGI:96550]
chr1	166254139	166262398	8260	+	0.496199	4.98437	10.4329	0.0012379	NM_001164528	ENSMUSG00000040612	Ildr2	immunoglobulin-like domain containing receptor 2 [Source:MGI Symbol;Acc:MGI:1196370]
chr10	127349402	127351536	2135	+	0.706607	3.78146	10.2273	0.00138381	NM_008382	ENSMUSG00000047492	Inhbe	inhibin beta E [Source:MGI Symbol;Acc:MGI:109269]
chr1	63047801	63061238	13438	+	-0.22797	6.77672	9.39698	0.00217344	NM_001081436	ENSMUSG00000040865	Ino80d	INO80 complex subunit D [Source:MGI Symbol;Acc:MGI:3027003]
chr1	63047801	63061329	13529	+	-0.222635	6.78575	8.86973	0.00289937	NM_001114609	ENSMUSG00000040865	Ino80d	INO80 complex subunit D [Source:MGI Symbol;Acc:MGI:3027003]
chr1	52789420	52791193	1774	+	-0.386806	4.77341	8.26304	0.00404602	NM_008384	ENSMUSG00000026102	Inpp1	inositol polyphosphate-1-phosphatase [Source:MGI Symbol;Acc:MGI:104848]
chr2	26396249	26400414	4166	+	0.515755	4.32027	7.44518	0.00636067	NM_033134	ENSMUSG00000026925	Inpp5e	inositol polyphosphate-5-phosphatase E [Source:MGI Symbol;Acc:MGI:1927753]
chr3	133091953	133094937	2985	+	0.924642	3.48267	9.479	0.00207837	NM_027927	ENSMUSG00000028016	Ints12	integrator complex subunit 12 [Source:MGI Symbol;Acc:MGI:1919043]
chr3	90391380	90395839	4460	+	0.408827	5.3726	6.99166	0.00818904	NM_145540	ENSMUSG00000027933	Ints3	integrator complex subunit 3 [Source:MGI Symbol;Acc:MGI:2140050]
chr3	90391380	90395758	4379	+	0.408827	5.3726	6.99166	0.00818904	NM_178876	ENSMUSG00000027933	Ints3	integrator complex subunit 3 [Source:MGI Symbol;Acc:MGI:2140050]
chr4	11202928	11207603	4676	+	0.666605	4.23566	9.72013	0.00182261	NM_001159595	ENSMUSG00000040738	Ints8	integrator complex subunit 8 [Source:MGI Symbol;Acc:MGI:1919906]
chr4	11199158	11202591	3434	+	0.668543	4.24174	9.27244	0.00232628	NM_178112	ENSMUSG00000040738	Ints8	integrator complex subunit 8 [Source:MGI Symbol;Acc:MGI:1919906]
chr9	108002648	108007059	4412	+	-0.322417	5.72692	6.90608	0.0085903	NM_013785	ENSMUSG00000032594	Ip6k1	inositol hexaphosphate kinase 1 [Source:MGI Symbol;Acc:MGI:1351633]
chr1	135382315	135388550	6236	+	0.388203	6.07309	7.4837	0.006226	NM_153774	ENSMUSG00000041879	Ipo9	importin 9 [Source:MGI Symbol;Acc:MGI:1918944]
chr9	106568319	106569045	727	+	-0.487449	4.10671	7.60651	0.00581579	NM_026090	ENSMUSG00000041009	Iqcf4	IQ motif containing F4 [Source:MGI Symbol;Acc:MGI:1914570]
chr9	82829806	82831698	1893	+	0.808867	3.07301	7.12397	0.00760603	NM_022986	ENSMUSG00000032251	Irak1bp1	interleukin-1 receptor-associated kinase 1 binding protein 1 [Source:MGI Symbol;Acc:MGI:1929475]
chr15	94543660	94546483	2824	+	-0.331409	6.55369	8.30701	0.00394925	NM_029926	ENSMUSG00000059883	Irak4	interleukin-1 receptor-associated kinase 4 [Source:MGI Symbol;Acc:MGI:2182474]
chr2	155133481	155138667	5187	+	0.6378	4.71608	9.02078	0.00266927	NM_008395	ENSMUSG00000027598	Itch	itchy, E3 ubiquitin protein ligase [Source:MGI Symbol;Acc:MGI:1202301]
chr2	155133481	155138869	5389	+	0.644273	4.72633	9.47485	0.00208308	NM_001243712	ENSMUSG00000027598	Itch	itchy, E3 ubiquitin protein ligase [Source:MGI Symbol;Acc:MGI:1202301]
chr7	128062640	128067321	4682	+	0.406909	5.15484	6.86858	0.00877241	NM_001082960	ENSMUSG00000030786	Itgam	integrin alpha M [Source:MGI Symbol;Acc:MGI:96607]
chr7	128062640	128067318	4679	+	0.406909	5.15484	6.86858	0.00877241	NM_008401	ENSMUSG00000030786	Itgam	integrin alpha M [Source:MGI Symbol;Acc:MGI:96607]
chr7	128129568	128133592	4025	+	0.874692	4.50323	10.1115	0.00147344	NM_021334	ENSMUSG00000030789	Itgax	integrin alpha X [Source:MGI Symbol;Acc:MGI:96609]
chr8	128685654	128689847	4194	+	0.919127	3.2564	10.7316	0.00105319	NM_010578	ENSMUSG00000025809	Itgb1	integrin beta 1 (fibronectin receptor beta) [Source:MGI Symbol;Acc:MGI:96610]
chr14	73362232	73364003	1772	+	-0.40542	5.14053	11.116	0.000855868	NM_008410	ENSMUSG00000022108	Itm2b	integral membrane protein 2B [Source:MGI Symbol;Acc:MGI:1309517]
chr6	146108299	146120022	11724	+	-0.188042	8.0936	9.22751	0.00238405	NM_010586	ENSMUSG00000030287	Itpr2	inositol 1,4,5-triphosphate receptor 2 [Source:MGI Symbol;Acc:MGI:99418]
chr6	146108299	146120121	11823	+	-0.185802	8.09542	9.12638	0.0025195	NM_019923	ENSMUSG00000030287	Itpr2	inositol 1,4,5-triphosphate receptor 2 [Source:MGI Symbol;Acc:MGI:99418]
chr6	52768068	52770992	2925	+	0.379477	4.644	7.50947	0.00613754	NM_173406	ENSMUSG00000063568	Jazf1	JAZF zinc finger 1 [Source:MGI Symbol;Acc:MGI:2141450]
chr12	72085839	72087796	1958	+	-0.343901	5.18539	7.05136	0.00792051	NM_001205067	ENSMUSG00000005078	Jkamp	JNK1/MAPK8-associated membrane protein [Source:MGI Symbol;Acc:MGI:1915057]
chr12	72085839	72087814	1976	+	-0.343901	5.18539	7.05136	0.00792051	NM_024205	ENSMUSG00000005078	Jkamp	JNK1/MAPK8-associated membrane protein [Source:MGI Symbol;Acc:MGI:1915057]
chr17	33810523	33813156	2634	+	1.14647	2.80946	16.7351	4.29777e-05	NM_030697	ENSMUSG00000042099	Kank3	KN motif and ankyrin repeat domains 3 [Source:MGI Symbol;Acc:MGI:1098615]
chr2	112379211	112382093	2883	+	0.724715	3.09115	8.08586	0.00446119	NM_024254	ENSMUSG00000027132	Katnbl1	katanin p80 subunit B like 1 [Source:MGI Symbol;Acc:MGI:1919675]
chr6	126708329	126714167	5839	+	-0.375303	5.45969	7.59026	0.00586846	NM_013568	ENSMUSG00000038077	Kcna6	potassium voltage-gated channel, shaker-related, subfamily, member 6 [Source:MGI Symbol;Acc:MGI:96663]
chr7	46396468	46400803	4336	+	-0.423557	6.23224	7.78497	0.00526825	NM_001112739	ENSMUSG00000058975	Kcnc1	potassium voltage gated channel, Shaw-related subfamily, member 1 [Source:MGI Symbol;Acc:MGI:96667]
chr16	92292389	92294082	1694	+	-0.431853	4.25981	6.8991	0.00862394	NM_134110	ENSMUSG00000039672	Kcne2	potassium voltage-gated channel, Isk-related subfamily, gene 2 [Source:MGI Symbol;Acc:MGI:1891123]
chr18	80294544	80297358	2815	+	0.79093	3.12173	11.6454	0.000643629	NM_001190373	ENSMUSG00000059852	Kcng2	potassium voltage-gated channel, subfamily G, member 2 [Source:MGI Symbol;Acc:MGI:3694646]
chr16	94761080	94764165	3086	+	-0.38928	5.24537	7.40613	0.00650019	NM_010606	ENSMUSG00000043301	Kcnj6	potassium inwardly-rectifying channel, subfamily J, member 6 [Source:MGI Symbol;Acc:MGI:104781]
chr14	23298694	23303655	4962	+	-0.245746	6.17813	8.64165	0.00328564	NM_001253373	ENSMUSG00000063142	Kcnma1	potassium large conductance calcium-activated channel, subfamily M, alpha member 1 [Source:MGI Symbol;Acc:MGI:99923]
chr14	23298694	23303811	5118	+	-0.244096	6.17876	8.45733	0.00363576	NM_010610	ENSMUSG00000063142	Kcnma1	potassium large conductance calcium-activated channel, subfamily M, alpha member 1 [Source:MGI Symbol;Acc:MGI:99923]
chr14	23306612	23312805	6194	+	-0.241042	6.43541	8.47361	0.00360337	NM_001253364	ENSMUSG00000063142	Kcnma1	potassium large conductance calcium-activated channel, subfamily M, alpha member 1 [Source:MGI Symbol;Acc:MGI:99923]
chr14	23298694	23303832	5139	+	-0.235228	6.2386	7.69015	0.0055523	NM_001253361	ENSMUSG00000063142	Kcnma1	potassium large conductance calcium-activated channel, subfamily M, alpha member 1 [Source:MGI Symbol;Acc:MGI:99923]
chr14	23298694	23303823	5130	+	-0.234211	6.23823	7.6542	0.00566403	NM_001253362	ENSMUSG00000063142	Kcnma1	potassium large conductance calcium-activated channel, subfamily M, alpha member 1 [Source:MGI Symbol;Acc:MGI:99923]
chr14	23298694	23303820	5127	+	-0.234211	6.23823	7.6542	0.00566403	NM_001253363	ENSMUSG00000063142	Kcnma1	potassium large conductance calcium-activated channel, subfamily M, alpha member 1 [Source:MGI Symbol;Acc:MGI:99923]
chr3	89520164	89527780	7617	+	0.550524	5.20037	15.5441	8.06034e-05	NM_080466	ENSMUSG00000000794	Kcnn3	potassium intermediate/small conductance calcium-activated channel, subfamily N, member 3 [Source:MGI Symbol;Acc:MGI:2153183]
chr2	181081022	181083798	2777	+	-0.416181	6.04464	8.5732	0.00341146	NM_010611	ENSMUSG00000016346	Kcnq2	potassium voltage-gated channel, subfamily Q, member 2 [Source:MGI Symbol;Acc:MGI:1309503]
chr8	25849623	25853153	3531	+	-0.293378	6.40249	7.25252	0.00708017	NM_008432	ENSMUSG00000031576	Kcnu1	potassium channel, subfamily U, member 1 [Source:MGI Symbol;Acc:MGI:1202300]
chr14	8214148	8215795	1648	+	-0.394168	5.07997	7.2095	0.00725188	NM_027782	ENSMUSG00000021752	Kctd6	potassium channel tetramerisation domain containing 6 [Source:MGI Symbol;Acc:MGI:1918643]
chr5	143403820	143405669	1850	+	-0.431501	5.05558	7.26891	0.00701584	NM_025841	ENSMUSG00000079111	Kdelr2	KDEL (Lys-Asp-Glu-Leu) endoplasmic reticulum protein retention receptor 2 [Source:MGI Symbol;Acc:MGI:1914163]
chr6	41686330	41688845	2516	+	1.12777	2.6762	15.3857	8.76468e-05	NM_032540	ENSMUSG00000029866	Kel	Kell blood group [Source:MGI Symbol;Acc:MGI:1346053]
chr13	46749088	46755952	6865	+	-0.334642	7.809	9.33275	0.00225095	NM_010617	ENSMUSG00000021375	Kif13a	kinesin family member 13A [Source:MGI Symbol;Acc:MGI:1098264]
chr2	109280738	109284105	3368	+	0.548402	4.94483	9.27949	0.00231734	NM_139303	ENSMUSG00000027115	Kif18a	kinesin family member 18A [Source:MGI Symbol;Acc:MGI:2446977]
chr4	41390748	41396345	5598	+	0.715343	4.55291	7.998	0.00468291	NM_024241	ENSMUSG00000028438	Kif24	kinesin family member 24 [Source:MGI Symbol;Acc:MGI:1918345]
chr13	106960585	106964792	4208	+	0.535167	4.83659	6.89067	0.00866466	NM_008442	ENSMUSG00000021693	Kif2a	kinesin family member 2A [Source:MGI Symbol;Acc:MGI:108390]
chr11	91575286	91577555	2270	+	-0.389993	5.63644	12.0779	0.000510228	NM_028547	ENSMUSG00000046755	Kif2b	kinesin family member 2B [Source:MGI Symbol;Acc:MGI:1920720]
chr5	75574987	75580167	5181	+	-0.267008	7.08649	7.56413	0.00595413	NM_001122733	ENSMUSG00000005672	Kit	kit oncogene [Source:MGI Symbol;Acc:MGI:96677]
chr5	75574991	75580155	5165	+	-0.266368	7.08563	7.56036	0.00596661	NM_021099	ENSMUSG00000005672	Kit	kit oncogene [Source:MGI Symbol;Acc:MGI:96677]
chr10	100015824	100021273	5450	+	0.966306	4.13805	6.97935	0.00824554	NM_013598	ENSMUSG00000019966	Kitl	kit ligand [Source:MGI Symbol;Acc:MGI:96974]
chr12	111758849	111761328	2480	+	-0.362119	6.73751	7.29892	0.00689959	NM_001081959	ENSMUSG00000021288	Klc1	kinesin light chain 1 [Source:MGI Symbol;Acc:MGI:107978]
chr12	111758849	111761352	2504	+	-0.360892	6.74154	7.38388	0.00658111	NM_001025360	ENSMUSG00000021288	Klc1	kinesin light chain 1 [Source:MGI Symbol;Acc:MGI:107978]
chr12	111758849	111761229	2381	+	-0.357776	6.69265	7.76018	0.00534108	NM_008450	ENSMUSG00000021288	Klc1	kinesin light chain 1 [Source:MGI Symbol;Acc:MGI:107978]
chr14	99870640	99876373	5734	+	-0.254567	6.21465	8.70115	0.00318009	NM_010636	ENSMUSG00000072294	Klf12	Kruppel-like factor 12 [Source:MGI Symbol;Acc:MGI:1333796]
chr5	64803523	64805836	2314	+	-0.442005	5.97827	9.99584	0.00156894	NM_008453	ENSMUSG00000029178	Klf3	Kruppel-like factor 3 (basic) [Source:MGI Symbol;Acc:MGI:1342773]
chr19	23141226	23144488	3263	+	-0.431885	5.30753	10.8635	0.000980769	NM_010638	ENSMUSG00000033863	Klf9	Kruppel-like factor 9 [Source:MGI Symbol;Acc:MGI:1333856]
chr5	24100590	24104016	3427	+	0.751198	3.64433	7.31998	0.00681923	NM_026448	ENSMUSG00000028986	Klhl7	kelch-like 7 [Source:MGI Symbol;Acc:MGI:1196453]
chr5	103862050	103865212	3163	+	-0.469926	6.70818	9.86957	0.00168035	NM_178741	ENSMUSG00000029312	Klhl8	kelch-like 8 [Source:MGI Symbol;Acc:MGI:2179430]
chr7	43945012	43945459	448	+	1.52751	1.60227	9.94963	0.00160882	NR_033120	ENSMUSG00000060161	Klk1b7-ps	kallikrein 1-related peptidase b7, pseudogene [Source:MGI Symbol;Acc:MGI:892027]
chr6	130218605	130219679	1075	+	1.15142	1.82327	7.64412	0.00569577	NM_014194	ENSMUSG00000067599	Klra7	killer cell lectin-like receptor, subfamily A, member 7 [Source:MGI Symbol;Acc:MGI:101901]
chr6	130218831	130219872	1042	+	1.24947	1.80932	8.52491	0.00350319	NM_001110323	ENSMUSG00000067599	Klra7	killer cell lectin-like receptor, subfamily A, member 7 [Source:MGI Symbol;Acc:MGI:101901]
chr9	44803355	44819793	16439	+	-0.191854	8.13224	7.4127	0.00647652	NM_001081049	ENSMUSG00000002028	Kmt2a	lysine (K)-specific methyltransferase 2A [Source:MGI Symbol;Acc:MGI:96995]
chr16	35983363	35987384	4022	+	0.87761	3.43122	8.04832	0.00455458	NM_008465	ENSMUSG00000022905	Kpna1	karyopherin (importin) alpha 1 [Source:MGI Symbol;Acc:MGI:103560]
chr6	71272019	71273767	1749	+	0.79419	2.53984	7.10301	0.00769545	NM_145568	ENSMUSG00000053012	Krcc1	lysine-rich coiled-coil 1 [Source:MGI Symbol;Acc:MGI:1889377]
chr11	99233098	99235832	2735	+	0.71154	3.66326	8.73965	0.00311365	NM_172946	ENSMUSG00000035849	Krt222	keratin 222 [Source:MGI Symbol;Acc:MGI:2442728]
chr11	99328484	99331083	2600	+	-0.341712	5.84914	6.99508	0.00817342	NM_001033397	ENSMUSG00000075570	Krt26	keratin 26 [Source:MGI Symbol;Acc:MGI:2444913]
chr11	99365007	99366495	1489	+	-0.390916	5.6777	7.20733	0.00726064	NM_027574	ENSMUSG00000055937	Krt28	keratin 28 [Source:MGI Symbol;Acc:MGI:1918093]
chr11	99514624	99516072	1449	+	0.50646	4.01352	7.87836	0.00500299	NM_213730	ENSMUSG00000064165	Krt39	keratin 39 [Source:MGI Symbol;Acc:MGI:3588208]
chr15	101689928	101692185	2258	+	0.684065	3.93697	15.3794	8.7943e-05	NM_008476	ENSMUSG00000058354	Krt6a	keratin 6A [Source:MGI Symbol;Acc:MGI:1100845]
chr16	88610709	88612279	1571	+	0.619428	3.42696	8.26199	0.00404838	NM_001163141	ENSMUSG00000050239	Krtap24-1	keratin associated protein 24-1 [Source:MGI Symbol;Acc:MGI:2685158]
chr11	99665043	99665960	918	+	1.07174	2.19937	8.87954	0.00288385	NM_026834	ENSMUSG00000075566	Krtap4-6	keratin associated protein 4-6 [Source:MGI Symbol;Acc:MGI:1916018]
chr14	77024201	77026619	2419	+	-0.321504	5.05563	7.22075	0.00720656	NM_172488	ENSMUSG00000044350	Lacc1	laccase (multicopper oxidoreductase) domain containing 1 [Source:MGI Symbol;Acc:MGI:2445077]
chr4	136622621	136624574	1954	+	1.14216	2.88947	11.1923	0.00082137	NM_001243262	ENSMUSG00000070683	Lactbl1	lactamase, beta-like 1 [Source:MGI Symbol;Acc:MGI:2448566]
chr1	135818598	135821589	2992	+	-0.302464	5.54734	6.90904	0.0085761	NM_133664	ENSMUSG00000041782	Lad1	ladinin [Source:MGI Symbol;Acc:MGI:109343]
chr1	153218922	153226543	7622	+	-0.190071	7.35297	8.34751	0.00386215	NM_010683	ENSMUSG00000026478	Lamc1	laminin, gamma 1 [Source:MGI Symbol;Acc:MGI:99914]
chr5	45493374	45495640	2267	+	-0.32742	5.39537	7.16142	0.00744882	NM_024434	ENSMUSG00000039682	Lap3	leucine aminopeptidase 3 [Source:MGI Symbol;Acc:MGI:1914238]
chr9	60713121	60715428	2308	+	-0.484644	5.81451	7.45446	0.00632795	NM_026235	ENSMUSG00000034839	Larp6	La ribonucleoprotein domain family, member 6 [Source:MGI Symbol;Acc:MGI:1914807]
chr2	158306493	158309017	2525	+	0.446583	4.61238	7.7313	0.00542715	NM_008489	ENSMUSG00000016024	Lbp	lipopolysaccharide binding protein [Source:MGI Symbol;Acc:MGI:1098776]
chr9	83393416	83397650	4235	+	-0.332656	6.22693	8.73909	0.0031146	NM_027448	ENSMUSG00000032258	Lca5	Leber congenital amaurosis 5 (human) [Source:MGI Symbol;Acc:MGI:1923032]
chr3	92967061	92967667	607	+	1.34088	1.53538	7.23766	0.00713898	NM_001254725	ENSMUSG00000074433	Lce3e	late cornified envelope 3E [Source:MGI Symbol;Acc:MGI:1916764]
chr2	25676786	25677513	728	+	1.48966	2.24972	16.0882	6.04599e-05	NM_177840	ENSMUSG00000045684	Lcn6	lipocalin 6 [Source:MGI Symbol;Acc:MGI:3045364]
chr9	21723576	21727952	4377	+	-0.401297	6.64581	9.01786	0.00267354	NM_001252658	ENSMUSG00000032193	Ldlr	low density lipoprotein receptor [Source:MGI Symbol;Acc:MGI:96765]
chr9	21723576	21728108	4533	+	-0.36173	6.70858	7.97439	0.00474438	NM_010700	ENSMUSG00000032193	Ldlr	low density lipoprotein receptor [Source:MGI Symbol;Acc:MGI:96765]
chr9	21723576	21728105	4530	+	-0.361256	6.70831	7.95064	0.00480703	NM_001252659	ENSMUSG00000032193	Ldlr	low density lipoprotein receptor [Source:MGI Symbol;Acc:MGI:96765]
chr2	101950201	101954110	3910	+	-0.334926	5.42158	7.02741	0.00802712	NM_178886	ENSMUSG00000048058	Ldlrad3	low density lipoprotein receptor class A domain containing 3 [Source:MGI Symbol;Acc:MGI:2138856]
chr15	78850860	78851451	592	+	1.09761	1.96444	7.85395	0.00507099	NM_025622	ENSMUSG00000043501	Lgals2	lectin, galactose-binding, soluble 2 [Source:MGI Symbol;Acc:MGI:895068]
chr11	20823355	20826989	3635	+	0.60097	3.72091	7.61193	0.00579833	NM_173752	ENSMUSG00000042363	Lgalsl	lectin, galactoside binding-like [Source:MGI Symbol;Acc:MGI:1916114]
chr9	123478701	123483553	4853	+	0.583362	4.21677	12.9032	0.000328023	NM_013860	ENSMUSG00000025239	Limd1	LIM domains containing 1 [Source:MGI Symbol;Acc:MGI:1352502]
chr11	106156256	106159205	2950	+	1.02818	2.70637	10.9041	0.000959509	NM_172397	ENSMUSG00000040699	Limd2	LIM domain containing 2 [Source:MGI Symbol;Acc:MGI:1915053]
chr12	84451508	84453651	2144	+	0.663623	3.61063	10.0305	0.00153968	NM_173756	ENSMUSG00000085793	Lin52	lin-52 homolog (C. elegans) [Source:MGI Symbol;Acc:MGI:3045391]
chr19	33961248	33962600	1353	+	1.07913	2.18258	8.44642	0.00365762	NM_026334	ENSMUSG00000024768	Lipf	lipase, gastric [Source:MGI Symbol;Acc:MGI:1914967]
chr16	75540514	75542595	2082	+	1.04578	2.69235	6.90323	0.008604	NM_001252513	ENSMUSG00000032948	Lipi	lipase, member I [Source:MGI Symbol;Acc:MGI:2443868]
chr1	37872206	37873760	1555	+	-0.47364	5.52043	7.12988	0.00758096	NM_001037918	ENSMUSG00000037216	Lipt1	lipoyltransferase 1 [Source:MGI Symbol;Acc:MGI:3645211]
chr15	9140570	9143615	3046	+	0.674742	4.4285	12.0387	0.000521087	NM_177178	ENSMUSG00000039704	Lmbrd2	LMBR1 domain containing 2 [Source:MGI Symbol;Acc:MGI:2444173]
chr16	33062521	33066631	4111	+	-0.240529	6.69201	9.10806	0.00254486	NM_172823	ENSMUSG00000022802	Lmln	leishmanolysin-like (metallopeptidase M8 family) [Source:MGI Symbol;Acc:MGI:2444736]
chr14	101729928	101736031	6104	+	-0.238104	7.07915	10.8119	0.00100849	NM_201529	ENSMUSG00000033060	Lmo7	LIM domain only 7 [Source:MGI Symbol;Acc:MGI:1353586]
chr2	74514837	74523611	8775	+	1.14525	3.95013	15.3446	8.95753e-05	NM_001110209	ENSMUSG00000009207	Lnp	limb and neural patterns [Source:MGI Symbol;Acc:MGI:1918115]
chr2	74514837	74523528	8692	+	1.14789	3.94094	15.5421	8.06872e-05	NM_027133	ENSMUSG00000009207	Lnp	limb and neural patterns [Source:MGI Symbol;Acc:MGI:1918115]
chr5	147016655	147021197	4543	+	-0.424473	7.43799	7.11106	0.00766097	NM_080795	ENSMUSG00000016520	Lnx2	ligand of numb-protein X 2 [Source:MGI Symbol;Acc:MGI:2155959]
chr18	77281958	77288552	6595	+	-0.334382	7.54395	12.1222	0.000498251	NM_172834	ENSMUSG00000032818	Loxhd1	lipoxygenase homology domains 1 [Source:MGI Symbol;Acc:MGI:1914609]
chr3	148815586	148821637	6052	+	-0.378258	7.61344	16.7893	4.17683e-05	NM_001081298	ENSMUSG00000028184	Lphn2	latrophilin 2 [Source:MGI Symbol;Acc:MGI:2139714]
chr3	86224690	86233520	8831	+	0.315561	6.26419	8.38887	0.00377525	NM_001077687	ENSMUSG00000028080	Lrba	LPS-responsive beige-like anchor [Source:MGI Symbol;Acc:MGI:1933162]
chr6	94604529	94609494	4966	+	-0.289507	6.23157	11.9672	0.000541441	NM_008377	ENSMUSG00000030029	Lrig1	leucine-rich repeats and immunoglobulin-like domains 1 [Source:MGI Symbol;Acc:MGI:107935]
chr10	125966219	125970268	4050	+	-0.36225	7.14849	8.24683	0.00408232	NM_177152	ENSMUSG00000020105	Lrig3	leucine-rich repeats and immunoglobulin-like domains 3 [Source:MGI Symbol;Acc:MGI:2443955]
chr15	39870603	39874666	4064	+	-0.336475	6.57781	11.2212	0.000808695	NM_172814	ENSMUSG00000022305	Lrp12	low density lipoprotein-related protein 12 [Source:MGI Symbol;Acc:MGI:2443132]
chr19	3584825	3589996	5172	+	-0.306385	7.36537	7.24884	0.00709469	NM_008513	ENSMUSG00000024913	Lrp5	low density lipoprotein receptor-related protein 5 [Source:MGI Symbol;Acc:MGI:1278315]
chr4	94636660	94639432	2773	+	1.00251	2.49392	7.86525	0.00503939	NM_175305	ENSMUSG00000049799	Lrrc19	leucine rich repeat containing 19 [Source:MGI Symbol;Acc:MGI:2140219]
chr6	48554799	48557479	2681	+	0.84236	2.41587	7.53977	0.00603516	NM_001110160	ENSMUSG00000073096	Lrrc61	leucine rich repeat containing 61 [Source:MGI Symbol;Acc:MGI:2652848]
chr4	14665754	14666963	1210	+	0.850558	2.41666	7.06228	0.00787237	NM_028499	ENSMUSG00000023151	Lrrc69	leucine rich repeat containing 69 [Source:MGI Symbol;Acc:MGI:1920564]
chr17	46254165	46255548	1384	+	0.830854	2.97969	7.82119	0.00516373	NM_001111142	ENSMUSG00000071073	Lrrc73	leucine rich repeat containing 73 [Source:MGI Symbol;Acc:MGI:2684934]
chr5	105519471	105522299	2829	+	-0.33123	6.44059	8.43479	0.00368109	NM_133897	ENSMUSG00000054720	Lrrc8c	leucine rich repeat containing 8 family, member C [Source:MGI Symbol;Acc:MGI:2140839]
chr5	105700810	105704716	3907	+	-0.491203	6.73142	9.89382	0.00165835	NM_178701	ENSMUSG00000046079	Lrrc8d	leucine rich repeat containing 8D [Source:MGI Symbol;Acc:MGI:1922368]
chr5	105699969	105703891	3923	+	-0.490999	6.72514	9.92432	0.00163109	NM_001122768	ENSMUSG00000046079	Lrrc8d	leucine rich repeat containing 8D [Source:MGI Symbol;Acc:MGI:1922368]
chr5	3845173	3848123	2951	+	0.759759	2.70638	6.882	0.0087068	NM_172879	ENSMUSG00000040367	Lrrd1	leucine rich repeats and death domain containing 1 [Source:MGI Symbol;Acc:MGI:3045299]
chr1	91053444	91056292	2849	+	-0.330822	6.76111	11.9017	0.000560827	NM_008515	ENSMUSG00000026305	Lrrfip1	leucine rich repeat (in FLII) interacting protein 1 [Source:MGI Symbol;Acc:MGI:1342770]
chr1	90998727	91000832	2106	+	-0.263604	6.03466	7.59515	0.00585254	NM_001111312	ENSMUSG00000026305	Lrrfip1	leucine rich repeat (in FLII) interacting protein 1 [Source:MGI Symbol;Acc:MGI:1342770]
chr6	91516035	91516665	631	+	-0.466471	3.88588	7.1978	0.0072993	NM_026309	ENSMUSG00000034192	Lsm3	LSM3 homolog, U6 small nuclear RNA associated (S. cerevisiae) [Source:MGI Symbol;Acc:MGI:1914928]
chr2	119751326	119754405	3080	+	0.886772	2.95587	9.49248	0.00206315	NM_203345	ENSMUSG00000027297	Ltk	leukocyte tyrosine kinase [Source:MGI Symbol;Acc:MGI:96840]
chr2	119751326	119754222	2897	+	0.905388	2.95053	9.73228	0.0018106	NM_206942	ENSMUSG00000027297	Ltk	leukocyte tyrosine kinase [Source:MGI Symbol;Acc:MGI:96840]
chr2	119751326	119753742	2417	+	0.913304	2.78634	9.93277	0.00162362	NM_206941	ENSMUSG00000027297	Ltk	leukocyte tyrosine kinase [Source:MGI Symbol;Acc:MGI:96840]
chr2	119751326	119753559	2234	+	0.937674	2.78021	10.2612	0.00135855	NM_008523	ENSMUSG00000027297	Ltk	leukocyte tyrosine kinase [Source:MGI Symbol;Acc:MGI:96840]
chr15	74762056	74762746	691	+	1.42217	1.88228	11.5394	0.000681356	NM_010742	ENSMUSG00000034634	Ly6d	lymphocyte antigen 6 complex, locus D [Source:MGI Symbol;Acc:MGI:96881]
chr2	60293760	60298931	5172	+	-0.312058	6.98076	9.42369	0.002142	NM_013825	ENSMUSG00000026980	Ly75	lymphocyte antigen 75 [Source:MGI Symbol;Acc:MGI:106662]
chr13	35978797	35980311	1515	+	1.1935	2.04162	9.68853	0.00185422	NM_201358	ENSMUSG00000046573	Lyrm4	LYR motif containing 4 [Source:MGI Symbol;Acc:MGI:2683538]
chr6	145211147	145212532	1386	+	1.42103	2.10437	14.2137	0.000163182	NM_133688	ENSMUSG00000040370	Lyrm5	LYR motif containing 5 [Source:MGI Symbol;Acc:MGI:1914886]
chr6	122309010	122311231	2222	+	1.14678	3.02902	9.82648	0.00172017	NM_010749	ENSMUSG00000007458	M6pr	mannose-6-phosphate receptor, cation dependent [Source:MGI Symbol;Acc:MGI:96904]
chr15	76351294	76352996	1703	+	0.774141	3.02788	7.19209	0.00732255	NM_026859	ENSMUSG00000022553	Maf1	MAF1 homolog (S. cerevisiae) [Source:MGI Symbol;Acc:MGI:1916127]
chr15	76351294	76352949	1656	+	0.774141	3.02788	7.19209	0.00732255	NM_001164608	ENSMUSG00000022553	Maf1	MAF1 homolog (S. cerevisiae) [Source:MGI Symbol;Acc:MGI:1916127]
chr15	76351294	76353042	1749	+	0.810547	3.05967	8.11641	0.00438663	NM_001164607	ENSMUSG00000022553	Maf1	MAF1 homolog (S. cerevisiae) [Source:MGI Symbol;Acc:MGI:1916127]
chrX	86250256	86252656	2401	+	-0.767354	3.18574	10.002	0.00156374	NM_001033492	ENSMUSG00000035427	Mageb4	melanoma antigen, family B, 4 [Source:MGI Symbol;Acc:MGI:2148568]
chrX	150806421	150808546	2126	+	0.597895	3.43383	8.50621	0.00353936	NM_030700	ENSMUSG00000025268	Maged2	melanoma antigen, family D, 2 [Source:MGI Symbol;Acc:MGI:1933391]
chrX	150806421	150808523	2103	+	0.631035	3.43803	9.5516	0.00199775	NM_001199246	ENSMUSG00000025268	Maged2	melanoma antigen, family D, 2 [Source:MGI Symbol;Acc:MGI:1933391]
chr6	93675453	93683056	7604	+	-0.363136	7.07668	9.59993	0.00194585	NM_010367	ENSMUSG00000045095	Magi1	membrane associated guanylate kinase, WW and PDZ domain containing 1 [Source:MGI Symbol;Acc:MGI:1203522]
chr6	93675453	93682633	7181	+	-0.35476	7.09719	9.37539	0.00219918	NM_001083320	ENSMUSG00000045095	Magi1	membrane associated guanylate kinase, WW and PDZ domain containing 1 [Source:MGI Symbol;Acc:MGI:1203522]
chr6	93675453	93683258	7806	+	-0.349991	7.10142	9.38953	0.00218229	NM_001029850	ENSMUSG00000045095	Magi1	membrane associated guanylate kinase, WW and PDZ domain containing 1 [Source:MGI Symbol;Acc:MGI:1203522]
chr6	93681478	93686582	5105	+	-0.262232	6.68827	7.65654	0.00565668	NM_001083321	ENSMUSG00000045095	Magi1	membrane associated guanylate kinase, WW and PDZ domain containing 1 [Source:MGI Symbol;Acc:MGI:1203522]
chr15	54571366	54574140	2775	+	0.532034	3.54348	7.18835	0.00733785	NM_178920	ENSMUSG00000024479	Mal2	mal, T cell differentiation protein 2 [Source:MGI Symbol;Acc:MGI:2146021]
chr9	106887415	106889620	2206	+	0.984794	2.92169	10.7618	0.00103615	NM_029103	ENSMUSG00000032575	Manf	mesencephalic astrocyte-derived neurotrophic factor [Source:MGI Symbol;Acc:MGI:1922090]
chr11	60932057	60934222	2166	+	0.633567	4.16088	7.18092	0.0073683	NM_008928	ENSMUSG00000018932	Map2k3	mitogen-activated protein kinase kinase 3 [Source:MGI Symbol;Acc:MGI:1346868]
chr11	110399122	110401185	2064	+	-0.276773	5.97044	8.71091	0.00316312	NM_011943	ENSMUSG00000020623	Map2k6	mitogen-activated protein kinase kinase 6 [Source:MGI Symbol;Acc:MGI:1346870]
chr15	102497647	102503174	5528	+	0.444285	4.8753	8.21974	0.00414372	NM_001163643	ENSMUSG00000023050	Map3k12	mitogen-activated protein kinase kinase kinase 12 [Source:MGI Symbol;Acc:MGI:1346881]
chr15	102497647	102502998	5352	+	0.445492	4.87112	8.35027	0.00385631	NM_009582	ENSMUSG00000023050	Map3k12	mitogen-activated protein kinase kinase kinase 12 [Source:MGI Symbol;Acc:MGI:1346881]
chrX	159988433	159992780	4348	+	0.758727	3.62869	12.1098	0.00050158	NM_001163085	ENSMUSG00000031303	Map3k15	mitogen-activated protein kinase kinase kinase 15 [Source:MGI Symbol;Acc:MGI:2448588]
chr7	28982854	28985551	2698	+	0.484263	5.38093	11.9528	0.000545645	NM_008279	ENSMUSG00000037337	Map4k1	mitogen-activated protein kinase kinase kinase kinase 1 [Source:MGI Symbol;Acc:MGI:1346882]
chr9	75386782	75390986	4205	+	-0.30439	6.15264	7.30704	0.00686848	NM_015806	ENSMUSG00000042688	Mapk6	mitogen-activated protein kinase 6 [Source:MGI Symbol;Acc:MGI:1354946]
chr9	75386782	75390990	4209	+	-0.300728	6.15358	7.03459	0.00799501	NM_027418	ENSMUSG00000042688	Mapk6	mitogen-activated protein kinase 6 [Source:MGI Symbol;Acc:MGI:1354946]
chr5	121525051	121527258	2208	+	0.406716	4.54549	7.99693	0.00468568	NM_010765	ENSMUSG00000029454	Mapkapk5	MAP kinase-activated protein kinase 5 [Source:MGI Symbol;Acc:MGI:1333110]
chr16	14109166	14116930	7765	+	0.357816	5.41066	8.64986	0.00327087	NM_001081154	ENSMUSG00000060657	Marf1	meiosis arrest female 1 [Source:MGI Symbol;Acc:MGI:2444505]
chr1	184896424	184900988	4565	+	-0.404822	7.24978	7.81168	0.00519097	NM_145515	ENSMUSG00000026620	Mark1	MAP/microtubule affinity-regulating kinase 1 [Source:MGI Symbol;Acc:MGI:2664902]
chr15	34306681	34310198	3518	+	0.558049	4.91074	11.7293	0.000615228	NM_016762	ENSMUSG00000022324	Matn2	matrilin 2 [Source:MGI Symbol;Acc:MGI:109613]
chr3	60501252	60506736	5485	+	0.868692	4.17018	10.9057	0.000958705	NM_001253708	ENSMUSG00000027763	Mbnl1	muscleblind-like 1 (Drosophila) [Source:MGI Symbol;Acc:MGI:1928482]
chrX	157547822	157552620	4799	+	0.841919	2.95186	10.5435	0.00116594	NM_172307	ENSMUSG00000046873	Mbtps2	membrane-bound transcription factor peptidase, site 2 [Source:MGI Symbol;Acc:MGI:2444506]
chr18	68337603	68338764	1162	+	-0.505496	5.16272	8.73091	0.0031286	NM_013596	ENSMUSG00000007480	Mc5r	melanocortin 5 receptor [Source:MGI Symbol;Acc:MGI:99420]
chr2	152687148	152687942	795	+	-0.610719	4.33107	10.4132	0.00125114	NM_025543	ENSMUSG00000042814	Mcts2	malignant T cell amplified sequence 2 [Source:MGI Symbol;Acc:MGI:1913655]
chr10	118141787	118144847	3061	+	-0.266301	6.19638	7.50372	0.00615718	NM_010785	ENSMUSG00000020212	Mdm1	transformed mouse 3T3 cell double minute 1 [Source:MGI Symbol;Acc:MGI:96951]
chr10	118141787	118144907	3121	+	-0.263214	6.25208	7.3488	0.00671074	NM_148922	ENSMUSG00000020212	Mdm1	transformed mouse 3T3 cell double minute 1 [Source:MGI Symbol;Acc:MGI:96951]
chr10	118141787	118144937	3151	+	-0.25128	6.26045	6.86858	0.00877244	NM_001162904	ENSMUSG00000020212	Mdm1	transformed mouse 3T3 cell double minute 1 [Source:MGI Symbol;Acc:MGI:96951]
chr18	73770040	73772494	2455	+	-0.320034	6.36664	9.082	0.00258137	NM_145494	ENSMUSG00000024556	Me2	malic enzyme 2, NAD(+)-dependent, mitochondrial [Source:MGI Symbol;Acc:MGI:2147351]
chr11	86265715	86277501	11787	+	0.584535	5.6357	10.3616	0.00128662	NM_001080931	ENSMUSG00000034297	Med13	mediator complex subunit 13 [Source:MGI Symbol;Acc:MGI:3029632]
chr16	3707215	3710340	3126	+	0.660288	3.70624	8.87527	0.0028906	NM_019453	ENSMUSG00000022534	Mefv	Mediterranean fever [Source:MGI Symbol;Acc:MGI:1859396]
chr16	3707215	3710308	3094	+	0.668598	3.70332	8.95025	0.00277432	NM_001161791	ENSMUSG00000022534	Mefv	Mediterranean fever [Source:MGI Symbol;Acc:MGI:1859396]
chr16	3707215	3710463	3249	+	0.668598	3.70332	8.95025	0.00277432	NM_001161790	ENSMUSG00000022534	Mefv	Mediterranean fever [Source:MGI Symbol;Acc:MGI:1859396]
chr18	57133090	57140603	7514	+	-0.332236	6.85237	8.71094	0.00316307	NM_001001979	ENSMUSG00000024593	Megf10	multiple EGF-like-domains 10 [Source:MGI Symbol;Acc:MGI:2685177]
chr11	101877510	101879717	2208	+	0.591964	3.49283	7.0467	0.00794112	NM_010791	ENSMUSG00000001493	Meox1	mesenchyme homeobox 1 [Source:MGI Symbol;Acc:MGI:103220]
chr2	69871195	69872165	971	+	0.648983	3.05741	7.29817	0.00690248	NM_029280	ENSMUSG00000051730	Mettl5	methyltransferase like 5 [Source:MGI Symbol;Acc:MGI:1922672]
chr10	128958277	128959503	1227	+	0.718836	3.58884	11.2517	0.000795487	NM_027853	ENSMUSG00000025347	Mettl7b	methyltransferase like 7B [Source:MGI Symbol;Acc:MGI:1918914]
chr2	121492681	121496099	3419	+	-0.358038	5.22387	7.21215	0.00724118	NM_026220	ENSMUSG00000068479	Mfap1a	microfibrillar-associated protein 1A [Source:MGI Symbol;Acc:MGI:1914782]
chr8	35587798	35594205	6408	+	-0.276779	6.61709	7.49449	0.00618881	NM_001081279	ENSMUSG00000070056	Mfhas1	malignant fibrous histiocytoma amplified sequence 1 [Source:MGI Symbol;Acc:MGI:1098644]
chr4	122946851	122949000	2150	+	0.548636	4.16276	8.1704	0.00425794	NM_029662	ENSMUSG00000028655	Mfsd2a	major facilitator superfamily domain containing 2A [Source:MGI Symbol;Acc:MGI:1923824]
chr2	119897228	119911158	13931	+	0.508287	5.54908	7.79287	0.00524528	NM_013720	ENSMUSG00000033943	Mga	MAX gene associated [Source:MGI Symbol;Acc:MGI:1352483]
chr2	119897228	119910531	13304	+	0.512801	5.52287	8.07003	0.00450034	NM_001164274	ENSMUSG00000033943	Mga	MAX gene associated [Source:MGI Symbol;Acc:MGI:1352483]
chr3	51388413	51389642	1230	+	1.03223	2.858	15.2075	9.63189e-05	NM_026358	ENSMUSG00000037161	Mgarp	mitochondria localized glutamic acid rich protein [Source:MGI Symbol;Acc:MGI:1914999]
chr18	10725625	10729417	3793	+	0.558554	4.43328	7.04534	0.00794718	NM_144860	ENSMUSG00000024294	Mib1	mindbomb homolog 1 (Drosophila) [Source:MGI Symbol;Acc:MGI:2443157]
chr11	98437708	98438451	744	+	0.998695	2.08921	7.71733	0.00546931	NM_025559	ENSMUSG00000002580	Mien1	migration and invasion enhancer 1 [Source:MGI Symbol;Acc:MGI:1913678]
chr11	106751226	106752784	1559	+	0.91405	2.8469	9.69215	0.00185057	NM_001033435	ENSMUSG00000040528	Milr1	mast cell immunoglobulin like receptor 1 [Source:MGI Symbol;Acc:MGI:2685731]
chr11	106751226	106752781	1556	+	0.91405	2.8469	9.69215	0.00185057	NM_001271372	ENSMUSG00000040528	Milr1	mast cell immunoglobulin like receptor 1 [Source:MGI Symbol;Acc:MGI:2685731]
chr19	32485769	32488387	2619	+	-0.334783	5.54481	8.25569	0.00406244	NM_010799	ENSMUSG00000024896	Minpp1	multiple inositol polyphosphate histidine phosphatase 1 [Source:MGI Symbol;Acc:MGI:1336159]
chr18	65248861	65248926	66	+	-0.825534	2.59507	7.85758	0.00506081	NR_029600	ENSMUSG00000065402	Mir122a	microRNA 122a [Source:MGI Symbol;Acc:MGI:2676805]
chr14	61631880	61631972	93	+	1.63743	1.38419	8.07055	0.00449904	NR_029734	ENSMUSG00000092995	Mir16-1	microRNA 16-1 [Source:MGI Symbol;Acc:MGI:2676843]
chr6	30165918	30165992	75	+	0.820949	2.49718	7.61722	0.00578136	NR_029569	ENSMUSG00000076361	Mir182	microRNA 182 [Source:MGI Symbol;Acc:MGI:2676846]
chr10	77641224	77641307	84	+	1.17939	1.81079	8.0338	0.00459124	NR_035451	ENSMUSG00000089424	Mir1930	microRNA 1930 [Source:MGI Symbol;Acc:MGI:3836965]
chr8	105615466	105615573	108	+	-0.872263	2.4454	7.77508	0.0052972	NR_035492	ENSMUSG00000089432	Mir1966	microRNA 1966 [Source:MGI Symbol;Acc:MGI:3837211]
chr14	115044305	115044391	87	+	1.52238	1.60754	9.98414	0.00157894	NR_029815	ENSMUSG00000076256	Mir19b-1	microRNA 19b-1 [Source:MGI Symbol;Acc:MGI:3629917]
chr14	115044157	115044263	107	+	1.5076	1.64361	10.0666	0.00150982	NR_029737	ENSMUSG00000065442	Mir20a	microRNA 20a [Source:MGI Symbol;Acc:MGI:2676872]
chr11	75461539	75463304	1766	+	0.951499	2.27067	7.95644	0.00479165	NR_030711	ENSMUSG00000085148	Mir22hg	Mir22 host gene (non-protein coding) [Source:MGI Symbol;Acc:MGI:1914348]
chr11	52126746	52126836	91	+	1.45461	2.08068	15.8675	6.79353e-05	NR_037221	ENSMUSG00000092870	Mir3061	microRNA 3061 [Source:MGI Symbol;Acc:MGI:4834233]
chr12	109712508	109712593	86	+	-0.849177	3.70159	11.5794	0.00066686	NR_029757	ENSMUSG00000065617	Mir323	microRNA 323 [Source:MGI Symbol;Acc:MGI:3619334]
chr12	109713481	109713577	97	+	1.00891	2.01792	6.89315	0.00865266	NR_029762	ENSMUSG00000065577	Mir329	microRNA 329 [Source:MGI Symbol;Acc:MGI:3619341]
chr12	109611500	109611595	96	+	-0.672749	3.28269	6.87467	0.0087426	NR_029770	ENSMUSG00000070101	Mir341	microRNA 341 [Source:MGI Symbol;Acc:MGI:3619357]
chr2	158638583	158638640	58	+	-0.611495	3.39434	7.09678	0.00772224	NR_037312	ENSMUSG00000093120	Mir3474	microRNA 3474 [Source:MGI Symbol;Acc:MGI:4441441]
chr12	109733771	109733846	76	+	0.860727	2.43348	7.46745	0.00628244	NR_029883	ENSMUSG00000065428	Mir382	microRNA 382 [Source:MGI Symbol;Acc:MGI:3619392]
chr3	142539864	142539923	60	+	1.9876	1.35741	9.71238	0.00183031	NR_030558	ENSMUSG00000065509	Mir421	microRNA 421 [Source:MGI Symbol;Acc:MGI:3718516]
chr9	108568777	108568861	85	+	-1.08611	2.97132	16.3159	5.36112e-05	NR_029947	ENSMUSG00000065579	Mir425	microRNA 425 [Source:MGI Symbol;Acc:MGI:3619401]
chr8	108470105	108470210	106	+	2.144	1.6443	17.1657	3.42566e-05	NR_030569	ENSMUSG00000078025	Mir466g	microRNA 466g [Source:MGI Symbol;Acc:MGI:3718536]
chr2	10507630	10507714	85	+	1.79709	1.72748	14.1576	0.00016812	NR_030572	ENSMUSG00000077021	Mir467d	microRNA 467d [Source:MGI Symbol;Acc:MGI:3718540]
chr12	109727333	109727414	82	+	-0.754899	3.70177	10.7945	0.00101802	NR_030271	ENSMUSG00000076219	Mir487b	microRNA 487b [Source:MGI Symbol;Acc:MGI:3619424]
chr6	36421742	36421825	84	+	-0.909217	3.25049	12.3697	0.000436365	NR_030524	ENSMUSG00000070075	Mir490	microRNA 490 [Source:MGI Symbol;Acc:MGI:3629662]
chr4	40850056	40850138	83	+	-1.84526	1.50917	9.34195	0.00223967	NR_039584	ENSMUSG00000096377	Mir5123	microRNA 5123 [Source:MGI Symbol;Acc:MGI:4950448]
chr12	109717258	109717333	76	+	-0.825784	3.81102	12.1199	0.000498867	NR_030261	ENSMUSG00000076241	Mir543	microRNA 543 [Source:MGI Symbol;Acc:MGI:3619432]
chr12	109563692	109563785	94	+	-0.636894	3.63325	8.47227	0.00360601	NR_030427	ENSMUSG00000076451	Mir770	microRNA 770 [Source:MGI Symbol;Acc:MGI:3691606]
chr4	115839198	115841746	2549	+	0.330993	4.87215	7.0536	0.00791062	NM_021461	ENSMUSG00000028708	Mknk1	MAP kinase-interacting serine/threonine kinase 1 [Source:MGI Symbol;Acc:MGI:894316]
chr12	85234520	85239947	5428	+	0.514451	5.37475	8.07314	0.00449263	NM_175337	ENSMUSG00000021245	Mlh3	mutL homolog 3 (E coli) [Source:MGI Symbol;Acc:MGI:1353455]
chr5	123394798	123402101	7304	+	0.356404	5.13873	7.1057	0.00768392	NM_133917	ENSMUSG00000038342	Mlxip	MLX interacting protein [Source:MGI Symbol;Acc:MGI:2141183]
chr5	135106891	135110539	3649	+	0.360365	4.8848	7.14431	0.00752022	NM_021455	ENSMUSG00000005373	Mlxipl	MLX interacting protein-like [Source:MGI Symbol;Acc:MGI:1927999]
chr2	50279881	50281182	1302	+	0.580438	3.27142	7.26364	0.00703647	NM_133839	ENSMUSG00000026766	Mmadhc	methylmalonic aciduria (cobalamin deficiency) cblD type, with homocystinuria [Source:MGI Symbol;Acc:MGI:1923786]
chr11	62648664	62650546	1883	+	-0.381196	5.40362	8.05978	0.00452586	NM_175002	ENSMUSG00000048497	Mmgt2	membrane magnesium transporter 2 [Source:MGI Symbol;Acc:MGI:2448491]
chr9	7272514	7275188	2675	+	0.76533	3.2737	7.74363	0.00539022	NM_008607	ENSMUSG00000050578	Mmp13	matrix metallopeptidase 13 [Source:MGI Symbol;Acc:MGI:1340026]
chr10	128790910	128794184	3275	+	0.824632	4.09793	11.3213	0.000766237	NM_001164197	ENSMUSG00000025355	Mmp19	matrix metallopeptidase 19 [Source:MGI Symbol;Acc:MGI:1927899]
chr10	128790953	128794362	3410	+	0.843277	4.09179	11.491	0.000699334	NM_021412	ENSMUSG00000025355	Mmp19	matrix metallopeptidase 19 [Source:MGI Symbol;Acc:MGI:1927899]
chr6	83326039	83327600	1562	+	0.994345	2.49972	9.46458	0.00209478	NM_145571	ENSMUSG00000043131	Mob1a	MOB kinase activator 1A [Source:MGI Symbol;Acc:MGI:2442631]
chr10	80685253	80687899	2647	+	-0.55341	5.59794	10.7211	0.00105919	NM_172457	ENSMUSG00000003348	Mob3a	MOB kinase activator 3A [Source:MGI Symbol;Acc:MGI:3050117]
chr1	55131245	55134070	2826	+	1.08971	2.68419	12.5885	0.00038812	NM_025283	ENSMUSG00000025979	Mob4	MOB family member 4, phocein [Source:MGI Symbol;Acc:MGI:104899]
chrX	139821635	139825742	4108	+	0.831747	3.44205	11.8923	0.000563678	NM_001193309	ENSMUSG00000031434	Morc4	microrchidia 4 [Source:MGI Symbol;Acc:MGI:1922996]
chrX	139821635	139826043	4409	+	0.849319	3.46095	13.5741	0.000229329	NM_029413	ENSMUSG00000031434	Morc4	microrchidia 4 [Source:MGI Symbol;Acc:MGI:1922996]
chrX	164936171	164940263	4093	+	0.800797	3.42429	8.9347	0.00279803	NM_029730	ENSMUSG00000061778	Mospd2	motile sperm domain containing 2 [Source:MGI Symbol;Acc:MGI:1924013]
chr7	64376541	64378742	2202	+	0.719221	4.04298	8.40275	0.00374653	NM_026483	ENSMUSG00000030521	Mphosph10	M-phase phosphoprotein 10 (U3 small nucleolar ribonucleoprotein) [Source:MGI Symbol;Acc:MGI:1915223]
chr14	56668248	56671185	2938	+	1.01637	3.66233	15.4487	8.47748e-05	NM_023773	ENSMUSG00000079184	Mphosph8	M-phase phosphoprotein 8 [Source:MGI Symbol;Acc:MGI:1922589]
chr1	165592181	165594536	2356	+	-0.343436	5.83091	9.08823	0.0025726	NM_001083897	ENSMUSG00000026566	Mpzl1	myelin protein zero-like 1 [Source:MGI Symbol;Acc:MGI:1915731]
chr1	165592181	165594430	2250	+	-0.328208	5.6002	8.55477	0.00344617	NM_001001880	ENSMUSG00000026566	Mpzl1	myelin protein zero-like 1 [Source:MGI Symbol;Acc:MGI:1915731]
chr9	45055181	45056215	1035	+	-0.390567	4.93427	9.78306	0.00176127	NM_001093749	ENSMUSG00000070305	Mpzl3	myelin protein zero-like 3 [Source:MGI Symbol;Acc:MGI:2442647]
chr7	145300909	145302914	2006	+	-0.568886	5.34734	8.39878	0.00375472	NM_145379	ENSMUSG00000031070	Mrgprf	MAS-related GPR, member F [Source:MGI Symbol;Acc:MGI:2384823]
chr1	88227020	88234521	7502	+	0.379514	7.94212	8.66717	0.00323994	NM_001281466	ENSMUSG00000079429	Mroh2a	maestro heat-like repeat family member 2A [Source:MGI Symbol;Acc:MGI:3705228]
chr2	157208548	157212009	3462	+	0.384046	4.89028	7.66105	0.00564255	NM_001039557	ENSMUSG00000074627	Mroh8	maestro heat-like repeat family member 8 [Source:MGI Symbol;Acc:MGI:3603828]
chr6	71812997	71816691	3695	+	-0.373218	5.181	7.6517	0.0056719	NM_025430	ENSMUSG00000052962	Mrpl35	mitochondrial ribosomal protein L35 [Source:MGI Symbol;Acc:MGI:1913473]
chr1	42851233	42852651	1419	+	-0.404733	5.85422	7.81219	0.0051895	NM_023514	ENSMUSG00000060679	Mrps9	mitochondrial ribosomal protein S9 [Source:MGI Symbol;Acc:MGI:1916777]
chr7	110868258	110874224	5967	+	0.411692	5.03359	8.5049	0.0035419	NM_010826	ENSMUSG00000005611	Mrvi1	MRV integration site 1 [Source:MGI Symbol;Acc:MGI:1338023]
chr7	110868258	110874467	6210	+	0.435545	5.04524	9.25047	0.00235435	NM_194464	ENSMUSG00000005611	Mrvi1	MRV integration site 1 [Source:MGI Symbol;Acc:MGI:1338023]
chr19	10962295	10963303	1009	+	1.04017	2.10014	7.89005	0.00497074	NM_023529	ENSMUSG00000024731	Ms4a10	membrane-spanning 4-domains, subfamily A, member 10 [Source:MGI Symbol;Acc:MGI:1917076]
chr4	48539946	48541525	1580	+	-0.470217	5.57349	9.6324	0.00191174	NM_001145925	ENSMUSG00000039693	Msantd3	Myb/SANT-like DNA-binding domain containing 3 [Source:MGI Symbol;Acc:MGI:1913915]
chr4	48540081	48541799	1719	+	-0.468445	5.57247	9.58737	0.00195921	NM_001145924	ENSMUSG00000039693	Msantd3	Myb/SANT-like DNA-binding domain containing 3 [Source:MGI Symbol;Acc:MGI:1913915]
chr4	48540499	48542096	1598	+	-0.467147	5.57156	9.40988	0.00215819	NM_028137	ENSMUSG00000039693	Msantd3	Myb/SANT-like DNA-binding domain containing 3 [Source:MGI Symbol;Acc:MGI:1913915]
chr11	98795769	98800108	4340	+	0.416798	4.94796	10.8959	0.000963775	NM_028722	ENSMUSG00000052915	Msl1	male-specific lethal 1 homolog (Drosophila) [Source:MGI Symbol;Acc:MGI:1921276]
chrX	168653099	168656436	3338	+	0.923872	3.55491	9.19412	0.00242793	NM_010832	ENSMUSG00000031358	Msl3	male-specific lethal 3 homolog (Drosophila) [Source:MGI Symbol;Acc:MGI:1341851]
chr17	25736040	25738667	2628	+	0.521412	4.17425	7.06293	0.00786952	NM_177822	ENSMUSG00000041062	Mslnl	mesothelin-like [Source:MGI Symbol;Acc:MGI:3607710]
chr8	39581700	39583166	1467	+	0.92923	3.16505	10.8532	0.000986251	NM_001113326	ENSMUSG00000025044	Msr1	macrophage scavenger receptor 1 [Source:MGI Symbol;Acc:MGI:98257]
chr14	64122621	64124484	1864	+	0.563301	4.12002	9.68584	0.00185693	NM_026322	ENSMUSG00000054733	Msra	methionine sulfoxide reductase A [Source:MGI Symbol;Acc:MGI:106916]
chr7	140046157	140048443	2287	+	0.791849	2.79776	7.80515	0.00520977	NM_010836	ENSMUSG00000025469	Msx3	msh homeobox 3 [Source:MGI Symbol;Acc:MGI:106587]
chr2	90847155	90849574	2420	+	1.03283	3.35129	12.7736	0.000351542	NM_019758	ENSMUSG00000027282	Mtch2	mitochondrial carrier homolog 2 (C. elegans) [Source:MGI Symbol;Acc:MGI:1929260]
chr11	29526397	29529040	2644	+	0.682466	4.13857	10.1841	0.00141656	NM_001282119	ENSMUSG00000020459	Mtif2	mitochondrial translational initiation factor 2 [Source:MGI Symbol;Acc:MGI:1924034]
chr11	29526397	29529118	2722	+	0.682466	4.13857	10.1841	0.00141656	NM_001282118	ENSMUSG00000020459	Mtif2	mitochondrial translational initiation factor 2 [Source:MGI Symbol;Acc:MGI:1924034]
chr11	29526397	29529396	3000	+	0.693432	4.14403	10.4493	0.00122694	NM_133767	ENSMUSG00000020459	Mtif2	mitochondrial translational initiation factor 2 [Source:MGI Symbol;Acc:MGI:1924034]
chr19	3388857	3391090	2234	+	1.25097	2.59554	11.6889	0.000628744	NM_001039657	ENSMUSG00000024905	Mtl5	metallothionein-like 5, testis-specific (tesmin) [Source:MGI Symbol;Acc:MGI:1340029]
chr9	13749181	13752197	3017	+	0.671739	3.68577	7.20061	0.00728788	NM_023858	ENSMUSG00000031918	Mtmr2	myotubularin related protein 2 [Source:MGI Symbol;Acc:MGI:1924366]
chr8	45069210	45070712	1503	+	-0.414169	4.63376	7.39036	0.00655742	NM_008639	ENSMUSG00000054764	Mtnr1a	melatonin receptor 1A [Source:MGI Symbol;Acc:MGI:102967]
chr2	74825812	74827069	1258	+	1.27049	2.55534	17.9029	2.32467e-05	NM_016804	ENSMUSG00000027099	Mtx2	metaxin 2 [Source:MGI Symbol;Acc:MGI:1859652]
chr2	110721494	110724770	3277	+	0.968058	2.87145	8.0079	0.00465738	NM_172979	ENSMUSG00000050808	Muc15	mucin 15 [Source:MGI Symbol;Acc:MGI:2442110]
chr16	32735886	32747161	11276	+	0.2018	6.08513	7.48225	0.00623101	NM_080457	ENSMUSG00000079620	Muc4	mucin 4 [Source:MGI Symbol;Acc:MGI:2153525]
chr4	61224307	61225290	984	+	1.18718	1.79386	7.04453	0.00795079	NM_001134674	ENSMUSG00000089873	Mup13	major urinary protein 13 [Source:MGI Symbol;Acc:MGI:3702003]
chr4	60136847	60139132	2286	+	1.15678	2.67149	10.3709	0.0012802	NM_001045550	ENSMUSG00000078688	Mup2	major urinary protein 2 [Source:MGI Symbol;Acc:MGI:97234]
chr4	60135913	60138630	2718	+	1.22695	2.74565	11.6694	0.000635368	NM_008647	ENSMUSG00000078688	Mup2	major urinary protein 2 [Source:MGI Symbol;Acc:MGI:97234]
chr3	108364911	108366186	1276	+	0.57033	3.68935	8.11065	0.0044006	NM_026831	ENSMUSG00000068745	Mybphl	myosin binding protein H-like [Source:MGI Symbol;Acc:MGI:1916003]
chr15	102331709	102333187	1479	+	0.566454	3.80402	7.92232	0.00488285	NM_021713	ENSMUSG00000001285	Myg1	melanocyte proliferating gene 1 [Source:MGI Symbol;Acc:MGI:1929864]
chr11	67200114	67206132	6019	+	-0.292537	7.14189	10.4105	0.00125303	NM_030679	ENSMUSG00000056328	Myh1	myosin, heavy polypeptide 1, skeletal muscle, adult [Source:MGI Symbol;Acc:MGI:1339711]
chr16	14194527	14201158	6632	+	0.254555	6.11688	7.69301	0.00554352	NM_013607	ENSMUSG00000018830	Myh11	myosin, heavy polypeptide 11, smooth muscle [Source:MGI Symbol;Acc:MGI:102643]
chr16	14194527	14201119	6593	+	0.255401	6.11505	7.61343	0.0057935	NM_001161775	ENSMUSG00000018830	Myh11	myosin, heavy polypeptide 11, smooth muscle [Source:MGI Symbol;Acc:MGI:102643]
chr11	67171027	67177109	6083	+	-0.365115	7.68491	7.50658	0.00614739	NM_001039545	ENSMUSG00000033196	Myh2	myosin, heavy polypeptide 2, skeletal muscle, adult [Source:MGI Symbol;Acc:MGI:1339710]
chr8	85324929	85327998	3070	+	0.811965	3.82407	9.51925	0.00203328	NM_175441	ENSMUSG00000031698	Mylk3	myosin light chain kinase 3 [Source:MGI Symbol;Acc:MGI:2443063]
chr10	63115795	63121040	5246	+	-0.348503	7.52563	7.73848	0.00540563	NM_182992	ENSMUSG00000020067	Mypn	myopalladin [Source:MGI Symbol;Acc:MGI:1916052]
chr16	38297754	38300518	2765	+	0.365488	5.65893	8.23135	0.00411728	NM_001081025	ENSMUSG00000022805	Maats1	MYCBP-associated, testis expressed 1 [Source:MGI Symbol;Acc:MGI:2443598]
chr6	122707565	122709778	2214	+	0.901043	2.57636	8.59885	0.00336376	NM_028016	ENSMUSG00000012396	Nanog	Nanog homeobox [Source:MGI Symbol;Acc:MGI:1919200]
chr11	121237236	121241647	4412	+	0.4993	4.65885	7.28127	0.00696772	NM_026272	ENSMUSG00000000056	Narf	nuclear prelamin A recognition factor [Source:MGI Symbol;Acc:MGI:1914858]
chr9	69397998	69402026	4029	+	0.778183	3.6378	8.13274	0.00434729	NM_145618	ENSMUSG00000032235	Narg2	NMDA receptor-regulated gene 2 [Source:MGI Symbol;Acc:MGI:2135947]
chr11	101552654	101557196	4543	+	0.475989	5.17488	12.0216	0.000525889	NM_001252222	ENSMUSG00000017119	Nbr1	neighbor of Brca1 gene 1 [Source:MGI Symbol;Acc:MGI:108498]
chr11	101552107	101556937	4831	+	0.476512	5.19607	12.8922	0.000329951	NM_001252220	ENSMUSG00000017119	Nbr1	neighbor of Brca1 gene 1 [Source:MGI Symbol;Acc:MGI:108498]
chr11	101552654	101557307	4654	+	0.482468	5.19846	12.527	0.000401106	NM_008676	ENSMUSG00000017119	Nbr1	neighbor of Brca1 gene 1 [Source:MGI Symbol;Acc:MGI:108498]
chr11	101552654	101557201	4548	+	0.503902	5.18904	13.5182	0.000236262	NM_001252223	ENSMUSG00000017119	Nbr1	neighbor of Brca1 gene 1 [Source:MGI Symbol;Acc:MGI:108498]
chr9	27030175	27035677	5503	+	0.412853	5.62931	9.67164	0.00187134	NM_178113	ENSMUSG00000035024	Ncapd3	non-SMC condensin II complex, subunit D3 [Source:MGI Symbol;Acc:MGI:2142989]
chr1	43445751	43448525	2775	+	-0.449608	5.90711	7.51011	0.00613537	NM_010879	ENSMUSG00000066877	Nck2	non-catalytic region of tyrosine kinase adaptor protein 2 [Source:MGI Symbol;Acc:MGI:1306821]
chr16	14163275	14164932	1658	+	0.530576	3.98638	9.92128	0.00163379	NM_001114085	ENSMUSG00000022678	Nde1	nuclear distribution gene E homolog 1 (A nidulans) [Source:MGI Symbol;Acc:MGI:1914453]
chr6	65671611	65676294	4684	+	0.945764	3.11678	9.00313	0.00269518	NM_172399	ENSMUSG00000049001	Ndnf	neuron-derived neurotrophic factor [Source:MGI Symbol;Acc:MGI:1915419]
chr2	156927342	156930024	2683	+	0.580416	4.42197	7.30015	0.00689488	NM_180956	ENSMUSG00000027634	Ndrg3	N-myc downstream regulated gene 3 [Source:MGI Symbol;Acc:MGI:1352499]
chr2	156927342	156929985	2644	+	0.692585	4.19093	10.7002	0.00107126	NM_013865	ENSMUSG00000027634	Ndrg3	N-myc downstream regulated gene 3 [Source:MGI Symbol;Acc:MGI:1352499]
chrX	37187589	37188081	493	+	1.21222	1.74102	7.7989	0.00522782	NM_019443	ENSMUSG00000016427	Ndufa1	NADH dehydrogenase (ubiquinone) 1 alpha subcomplex, 1 [Source:MGI Symbol;Acc:MGI:1929511]
chr13	108052589	108053268	680	+	1.12843	2.03544	8.79106	0.0030271	NM_001127346	ENSMUSG00000068184	Ndufaf2	NADH dehydrogenase (ubiquinone) 1 alpha subcomplex, assembly factor 2 [Source:MGI Symbol;Acc:MGI:1922847]
chr1	58586599	58587130	532	+	1.04199	2.4945	9.29597	0.00229659	NM_025597	ENSMUSG00000026032	Ndufb3	NADH dehydrogenase (ubiquinone) 1 beta subcomplex 3 [Source:MGI Symbol;Acc:MGI:1913745]
chr1	171234860	171236465	1606	+	-0.395627	6.10381	10.3289	0.00130964	NM_153064	ENSMUSG00000013593	Ndufs2	NADH dehydrogenase (ubiquinone) Fe-S protein 2 [Source:MGI Symbol;Acc:MGI:2385112]
chr4	14952245	14957166	4922	+	0.892307	3.95841	11.0468	0.000888393	NM_178617	ENSMUSG00000040536	Necab1	N-terminal EF-hand calcium binding protein 1 [Source:MGI Symbol;Acc:MGI:1916602]
chr18	64887756	64895918	8163	+	-0.253527	7.19064	9.19845	0.0024222	NM_001114386	ENSMUSG00000024589	Nedd4l	neural precursor cell expressed, developmentally down-regulated gene 4-like [Source:MGI Symbol;Acc:MGI:1933754]
chr18	65023527	65031738	8212	+	-0.244747	7.19765	8.83728	0.00295139	NM_031881	ENSMUSG00000024589	Nedd4l	neural precursor cell expressed, developmentally down-regulated gene 4-like [Source:MGI Symbol;Acc:MGI:1933754]
chr9	57143256	57144425	1170	+	-0.392812	4.87906	7.25185	0.00708282	NM_028347	ENSMUSG00000032298	Neil1	nei endonuclease VIII-like 1 (E. coli) [Source:MGI Symbol;Acc:MGI:1920024]
chr9	105162467	105165091	2625	+	0.728579	4.07267	7.02212	0.00805088	NM_172461	ENSMUSG00000035032	Nek11	NIMA (never in mitosis gene a)-related expressed kinase 11 [Source:MGI Symbol;Acc:MGI:2442276]
chr8	22073616	22076019	2404	+	0.622854	4.18914	6.89337	0.00865162	NM_177898	ENSMUSG00000037738	Nek5	NIMA (never in mitosis gene a)-related expressed kinase 5 [Source:MGI Symbol;Acc:MGI:2142824]
chr12	69311543	69315264	3722	+	0.554858	4.75636	8.48881	0.00357338	NM_025441	ENSMUSG00000020982	Nemf	nuclear export mediator factor [Source:MGI Symbol;Acc:MGI:1918305]
chr6	55677819	55679971	2153	+	0.798925	2.51547	7.29538	0.00691321	NM_009717	ENSMUSG00000037984	Neurod6	neurogenic differentiation 6 [Source:MGI Symbol;Acc:MGI:106593]
chr11	4765845	4770572	4728	+	0.464269	5.02107	9.88849	0.00166315	NM_010898	ENSMUSG00000009073	Nf2	neurofibromatosis 2 [Source:MGI Symbol;Acc:MGI:97307]
chr11	4765845	4770588	4744	+	0.464269	5.02107	9.88849	0.00166315	NM_001252252	ENSMUSG00000009073	Nf2	neurofibromatosis 2 [Source:MGI Symbol;Acc:MGI:97307]
chr11	4765845	4770617	4773	+	0.470803	5.03283	10.1621	0.00143361	NM_001252250	ENSMUSG00000009073	Nf2	neurofibromatosis 2 [Source:MGI Symbol;Acc:MGI:97307]
chr18	80606205	80610811	4607	+	-0.383092	6.71866	8.16505	0.00427054	NM_198429	ENSMUSG00000033016	Nfatc1	nuclear factor of activated T cells, cytoplasmic, calcineurin dependent 1 [Source:MGI Symbol;Acc:MGI:102469]
chr18	80606205	80610519	4315	+	-0.380695	6.7176	8.05809	0.00453008	NM_001164111	ENSMUSG00000033016	Nfatc1	nuclear factor of activated T cells, cytoplasmic, calcineurin dependent 1 [Source:MGI Symbol;Acc:MGI:102469]
chr18	80606205	80611100	4896	+	-0.358696	6.78099	7.06627	0.00785484	NM_001164110	ENSMUSG00000033016	Nfatc1	nuclear factor of activated T cells, cytoplasmic, calcineurin dependent 1 [Source:MGI Symbol;Acc:MGI:102469]
chr18	80606205	80610808	4604	+	-0.356362	6.77997	6.96994	0.00828904	NM_001164112	ENSMUSG00000033016	Nfatc1	nuclear factor of activated T cells, cytoplasmic, calcineurin dependent 1 [Source:MGI Symbol;Acc:MGI:102469]
chr18	80647435	80652231	4797	+	-0.35485	6.90875	10.4196	0.00124688	NM_001164109	ENSMUSG00000033016	Nfatc1	nuclear factor of activated T cells, cytoplasmic, calcineurin dependent 1 [Source:MGI Symbol;Acc:MGI:102469]
chr18	80647435	80651939	4505	+	-0.352978	6.90781	10.3985	0.00126115	NM_016791	ENSMUSG00000033016	Nfatc1	nuclear factor of activated T cells, cytoplasmic, calcineurin dependent 1 [Source:MGI Symbol;Acc:MGI:102469]
chr14	55015454	55016653	1200	+	-0.332157	5.72462	7.4845	0.00622323	NM_026890	ENSMUSG00000022204	Ngdn	neuroguidin, EIF4E binding protein [Source:MGI Symbol;Acc:MGI:1916216]
chr3	102010145	102013497	3353	+	1.14322	2.87458	10.6399	0.00110673	NM_178777	ENSMUSG00000048540	Nhlh2	nescient helix loop helix 2 [Source:MGI Symbol;Acc:MGI:97324]
chr16	57156665	57157950	1286	+	0.926863	2.48363	6.86974	0.00876673	NM_023175	ENSMUSG00000022751	Nit2	nitrilase family, member 2 [Source:MGI Symbol;Acc:MGI:1261838]
chr13	73819328	73822549	3222	+	0.801384	3.7284	9.05965	0.00261312	NM_028186	ENSMUSG00000021567	Nkd2	naked cuticle 2 homolog (Drosophila) [Source:MGI Symbol;Acc:MGI:1919543]
chr7	20008023	20011366	3344	+	0.803104	3.18194	8.6518	0.00326739	NM_194058	ENSMUSG00000060508	Nlrp9b	NLR family, pyrin domain containing 9B [Source:MGI Symbol;Acc:MGI:2675377]
chr3	69722055	69723792	1738	+	0.679778	3.26883	7.07556	0.00781423	NM_133787	ENSMUSG00000027787	Nmd3	NMD3 homolog (S. cerevisiae) [Source:MGI Symbol;Acc:MGI:2140103]
chr13	19645079	19646781	1703	+	0.890555	3.32475	11.5033	0.000694739	NM_001167909	ENSMUSG00000041138	Nme8	NME/NM23 family member 8 [Source:MGI Symbol;Acc:MGI:1920662]
chr13	19645079	19647165	2087	+	0.923497	3.39796	12.2257	0.000471347	NM_181591	ENSMUSG00000041138	Nme8	NME/NM23 family member 8 [Source:MGI Symbol;Acc:MGI:1920662]
chr2	3284212	3288672	4461	+	0.636007	4.00233	7.98243	0.00472334	NM_008708	ENSMUSG00000026643	Nmt2	N-myristoyltransferase 2 [Source:MGI Symbol;Acc:MGI:1202298]
chr5	76333495	76334311	817	+	0.742941	3.10853	8.32562	0.00390898	NM_019515	ENSMUSG00000029236	Nmu	neuromedin U [Source:MGI Symbol;Acc:MGI:1860476]
chr18	22693155	22698182	5028	+	0.801334	3.67796	7.80024	0.00522394	NM_199024	ENSMUSG00000041923	Nol4	nucleolar protein 4 [Source:MGI Symbol;Acc:MGI:2441684]
chr4	152039327	152041606	2280	+	-0.295381	6.22443	12.6708	0.000371414	NM_028727	ENSMUSG00000028948	Nol9	nucleolar protein 9 [Source:MGI Symbol;Acc:MGI:1921285]
chr4	152039327	152043062	3736	+	-0.215828	6.34312	8.12563	0.00436439	NM_001159599	ENSMUSG00000028948	Nol9	nucleolar protein 9 [Source:MGI Symbol;Acc:MGI:1921285]
chr1	59685006	59686981	1976	+	1.08007	2.49377	8.18792	0.00421703	NM_018868	ENSMUSG00000026020	Nop58	NOP58 ribonucleoprotein [Source:MGI Symbol;Acc:MGI:1933184]
chr2	69135800	69137606	1807	+	0.458209	4.41185	8.86388	0.00290868	NM_181547	ENSMUSG00000034738	Nostrin	nitric oxide synthase trafficker [Source:MGI Symbol;Acc:MGI:3606242]
chr17	3635240	3637031	1792	+	0.548272	4.25151	7.36842	0.00663793	NM_198958	ENSMUSG00000023802	Nox3	NADPH oxidase 3 [Source:MGI Symbol;Acc:MGI:2681162]
chr7	87246649	87250399	3751	+	1.07877	3.14218	11.4084	0.00073113	NM_015760	ENSMUSG00000030562	Nox4	NADPH oxidase 4 [Source:MGI Symbol;Acc:MGI:1354184]
chr9	53537047	53544393	7347	+	0.77286	4.83679	11.5877	0.000663894	NM_001081152	ENSMUSG00000033054	Npat	nuclear protein in the AT region [Source:MGI Symbol;Acc:MGI:107605]
chr18	12189694	12194902	5209	+	-0.243974	7.08539	9.74231	0.00180075	NM_008720	ENSMUSG00000024413	Npc1	Niemann Pick type C1 [Source:MGI Symbol;Acc:MGI:1097712]
chr5	89527429	89529071	1643	+	0.678573	3.33214	7.0648	0.00786129	NM_133192	ENSMUSG00000035528	Npffr2	neuropeptide FF receptor 2 [Source:MGI Symbol;Acc:MGI:1860130]
chr9	104002544	104008437	5894	+	-0.216729	6.93829	8.10989	0.00440244	NM_028721	ENSMUSG00000032558	Nphp3	nephronophthisis 3 (adolescent) [Source:MGI Symbol;Acc:MGI:1921275]
chr11	32231963	32234827	2865	+	0.704801	3.95752	8.69592	0.00318924	NM_181569	ENSMUSG00000020289	Nprl3	nitrogen permease regulator-like 3 [Source:MGI Symbol;Acc:MGI:109258]
chr11	32231963	32234697	2735	+	0.710382	3.91017	9.18506	0.00243999	NM_001284360	ENSMUSG00000020289	Nprl3	nitrogen permease regulator-like 3 [Source:MGI Symbol;Acc:MGI:109258]
chr9	58582240	58584316	2077	+	1.05708	2.36816	9.21587	0.00239926	NM_009145	ENSMUSG00000032336	Nptn	neuroplastin [Source:MGI Symbol;Acc:MGI:108077]
chr11	98767932	98770696	2765	+	-0.44221	4.95546	8.88873	0.00286936	NM_145434	ENSMUSG00000020889	Nr1d1	nuclear receptor subfamily 1, group D, member 1 [Source:MGI Symbol;Acc:MGI:2444210]
chr16	38248349	38250875	2527	+	-0.341986	5.56045	8.58377	0.00339173	NM_010936	ENSMUSG00000022809	Nr1i2	nuclear receptor subfamily 1, group I, member 2 [Source:MGI Symbol;Acc:MGI:1337040]
chr16	38248349	38250752	2404	+	-0.329531	5.5513	7.59793	0.00584353	NM_001098404	ENSMUSG00000022809	Nr1i2	nuclear receptor subfamily 1, group I, member 2 [Source:MGI Symbol;Acc:MGI:1337040]
chr6	92091418	92099037	7620	+	0.5338	4.369	8.45435	0.00364172	NM_011630	ENSMUSG00000005893	Nr2c2	nuclear receptor subfamily 2, group C, member 2 [Source:MGI Symbol;Acc:MGI:1352466]
chr9	110621135	110622298	1164	+	0.716212	2.91472	7.35982	0.00666975	NM_026012	ENSMUSG00000032491	Nradd	neurotrophin receptor associated death domain [Source:MGI Symbol;Acc:MGI:1914419]
chr19	56320041	56325542	5502	+	-0.187393	7.26676	7.30456	0.00687799	NM_008733	ENSMUSG00000049134	Nrap	nebulin-related anchoring protein [Source:MGI Symbol;Acc:MGI:1098765]
chr19	56320041	56325437	5397	+	-0.187393	7.26676	7.30456	0.00687799	NM_198059	ENSMUSG00000049134	Nrap	nebulin-related anchoring protein [Source:MGI Symbol;Acc:MGI:1098765]
chr16	76290862	76295390	4529	+	-0.480667	7.10299	9.72189	0.00182086	NM_173440	ENSMUSG00000048490	Nrip1	nuclear receptor interacting protein 1 [Source:MGI Symbol;Acc:MGI:1315213]
chr11	103821783	103825547	3765	+	-0.250256	7.04076	7.99066	0.00470193	NM_008740	ENSMUSG00000034187	Nsf	N-ethylmaleimide sensitive fusion protein [Source:MGI Symbol;Acc:MGI:104560]
chr2	14995131	14998059	2929	+	0.606269	3.6486	7.35079	0.00670335	NM_028950	ENSMUSG00000026707	Nsun6	NOL1/NOP2/Sun domain family member 6 [Source:MGI Symbol;Acc:MGI:1921705]
chr12	10369971	10371825	1855	+	-0.440904	5.56579	15.6438	7.64633e-05	NM_027588	ENSMUSG00000020622	Nt5c1b	5'-nucleotidase, cytosolic IB [Source:MGI Symbol;Acc:MGI:1918131]
chr6	56882402	56883918	1517	+	0.677391	4.28566	8.81844	0.00298202	NM_001252374	ENSMUSG00000029780	Nt5c3	5'-nucleotidase, cytosolic III [Source:MGI Symbol;Acc:MGI:1927186]
chr10	34303612	34306327	2716	+	0.78029	3.4232	10.6522	0.0010994	NM_176968	ENSMUSG00000039480	Nt5dc1	5'-nucleotidase domain containing 1 [Source:MGI Symbol;Acc:MGI:2442446]
chr9	88327609	88331188	3580	+	0.634104	4.56084	12.4151	0.000425885	NM_011851	ENSMUSG00000032420	Nt5e	5' nucleotidase, ecto [Source:MGI Symbol;Acc:MGI:99782]
chr2	29194821	29196590	1770	+	-0.407854	5.73363	6.98219	0.00823246	NM_133501	ENSMUSG00000035513	Ntng2	netrin G2 [Source:MGI Symbol;Acc:MGI:2159341]
chr13	58807697	58816440	8744	+	-0.228719	7.27097	9.43364	0.00213042	NM_001025074	ENSMUSG00000055254	Ntrk2	neurotrophic tyrosine kinase, receptor, type 2 [Source:MGI Symbol;Acc:MGI:97384]
chr13	58806569	58815279	8711	+	-0.227421	7.27279	9.57311	0.00197448	NM_001282961	ENSMUSG00000055254	Ntrk2	neurotrophic tyrosine kinase, receptor, type 2 [Source:MGI Symbol;Acc:MGI:97384]
chr17	24882611	24884040	1430	+	0.967244	3.13309	10.4207	0.00124609	NM_011956	ENSMUSG00000039183	Nubp2	nucleotide binding protein 2 [Source:MGI Symbol;Acc:MGI:1347072]
chr17	27579391	27581561	2171	+	-0.26302	5.50557	7.10906	0.00766953	NM_019837	ENSMUSG00000024213	Nudt3	nudix (nucleotide diphosphate linked moiety X)-type motif 3 [Source:MGI Symbol;Acc:MGI:1928484]
chr10	95547007	95550237	3231	+	1.13435	2.92253	8.69707	0.00318723	NM_027722	ENSMUSG00000020029	Nudt4	nudix (nucleoside diphosphate linked moiety X)-type motif 4 [Source:MGI Symbol;Acc:MGI:1918457]
chr12	83794034	83797465	3432	+	0.421728	4.4699	7.77897	0.00528578	NM_001272056	ENSMUSG00000021224	Numb	numb gene homolog (Drosophila) [Source:MGI Symbol;Acc:MGI:107423]
chr12	83794034	83797268	3235	+	0.436745	4.46258	8.01243	0.00464575	NM_010949	ENSMUSG00000021224	Numb	numb gene homolog (Drosophila) [Source:MGI Symbol;Acc:MGI:107423]
chr12	83794034	83797415	3382	+	0.44805	4.48646	8.15621	0.00429139	NM_001136075	ENSMUSG00000021224	Numb	numb gene homolog (Drosophila) [Source:MGI Symbol;Acc:MGI:107423]
chr12	83794034	83797382	3349	+	0.451768	4.48158	8.35691	0.00384223	NM_001272055	ENSMUSG00000021224	Numb	numb gene homolog (Drosophila) [Source:MGI Symbol;Acc:MGI:107423]
chr6	91013067	91020101	7035	+	0.245646	6.17534	7.78654	0.00526369	NM_018815	ENSMUSG00000030091	Nup210	nucleoporin 210 [Source:MGI Symbol;Acc:MGI:1859555]
chr7	44816420	44818803	2384	+	0.514756	3.94099	7.58875	0.00587337	NM_053074	ENSMUSG00000043858	Nup62	nucleoporin 62 [Source:MGI Symbol;Acc:MGI:1351500]
chr3	51416016	51422105	6090	+	0.665509	4.68332	9.66748	0.00187558	NM_053089	ENSMUSG00000063273	Naa15	N(alpha)-acetyltransferase 15, NatA auxiliary subunit [Source:MGI Symbol;Acc:MGI:1922088]
chr14	79334507	79338381	3875	+	0.568776	4.41293	6.92586	0.0084958	NM_025832	ENSMUSG00000022020	Naa16	N(alpha)-acetyltransferase 16, NatA auxiliary subunit [Source:MGI Symbol;Acc:MGI:1914147]
chr9	43221278	43223665	2388	+	0.528192	4.18285	11.7696	0.00060206	NM_178644	ENSMUSG00000032014	Oaf	OAF homolog (Drosophila) [Source:MGI Symbol;Acc:MGI:94852]
chr5	120861422	120863122	1701	+	0.720073	2.91003	7.87676	0.0050074	NM_145228	ENSMUSG00000001168	Oas1h	2'-5' oligoadenylate synthetase 1H [Source:MGI Symbol;Acc:MGI:2180853]
chr2	25737009	25737740	732	+	1.10824	1.91533	7.05596	0.00790021	NM_001099301	ENSMUSG00000079539	Obp2b	odorant binding protein 2B [Source:MGI Symbol;Acc:MGI:3651927]
chr3	145118600	145120890	2291	+	0.494449	3.95484	6.95728	0.00834788	NM_025714	ENSMUSG00000028256	Odf2l	outer dense fiber of sperm tails 2-like [Source:MGI Symbol;Acc:MGI:1098600]
chr2	119609532	119611088	1557	+	1.54849	2.10029	13.0277	0.000306911	NM_001042653	ENSMUSG00000072980	Oip5	Opa interacting protein 5 [Source:MGI Symbol;Acc:MGI:1917895]
chr2	86197803	86198750	948	+	1.56834	2.08024	16.6426	4.5127e-05	NM_147017	ENSMUSG00000075198	Olfr1045	olfactory receptor 1045 [Source:MGI Symbol;Acc:MGI:3030879]
chr13	21573510	21574454	945	+	1.06812	2.22406	8.96717	0.00274873	NM_146540	ENSMUSG00000046016	Olfr1364	olfactory receptor 1364 [Source:MGI Symbol;Acc:MGI:3031198]
chr11	52154876	52156643	1768	+	-0.60808	3.67197	10.4129	0.0012514	NR_034155	ENSMUSG00000084141	Olfr1372-ps1	olfactory receptor 1372, pseudogene 1 [Source:MGI Symbol;Acc:MGI:3031206]
chr11	49327413	49328348	936	+	1.09964	1.8152	6.87026	0.00876419	NM_146468	ENSMUSG00000096909	Olfr1391	olfactory receptor 1391 [Source:MGI Symbol;Acc:MGI:3031225]
chr11	49160016	49160954	939	+	0.983934	2.85214	11.7726	0.000601102	NM_146276	ENSMUSG00000048378	Olfr1394	olfactory receptor 1394 [Source:MGI Symbol;Acc:MGI:3031228]
chr19	13827459	13828394	936	+	1.54208	1.99444	14.3718	0.000150029	NM_001011831	ENSMUSG00000054526	Olfr1500	olfactory receptor 1500 [Source:MGI Symbol;Acc:MGI:3031334]
chr14	52450393	52451402	1010	+	0.768946	3.3476	7.21643	0.00722393	NM_020514	ENSMUSG00000035626	Olfr1509	olfactory receptor 1509 [Source:MGI Symbol;Acc:MGI:3031343]
chr15	98456312	98457247	936	+	-0.576742	5.37179	11.4468	0.000716164	NM_146280	ENSMUSG00000032987	Olfr281	olfactory receptor 281 [Source:MGI Symbol;Acc:MGI:3030115]
chr11	58597345	58598466	1122	+	-0.428431	4.97639	7.96594	0.00476657	NM_001011743	ENSMUSG00000056564	Olfr324	olfactory receptor 324 [Source:MGI Symbol;Acc:MGI:3030158]
chr6	42460076	42461017	942	+	1.34879	1.89653	11.0331	0.000895006	NM_146444	ENSMUSG00000068574	Olfr458	olfactory receptor 458 [Source:MGI Symbol;Acc:MGI:3030292]
chr11	87892987	87893922	936	+	0.997358	2.74649	9.30529	0.00228493	NM_146413	ENSMUSG00000093920	Olfr463	olfactory receptor 463 [Source:MGI Symbol;Acc:MGI:3030297]
chr2	89844066	89844971	906	+	-0.554212	3.5572	6.90769	0.00858259	NM_010990	ENSMUSG00000075072	Olfr48	olfactory receptor 48 [Source:MGI Symbol;Acc:MGI:1333765]
chr7	6480216	6481259	1044	+	1.20483	1.76065	7.5061	0.00614904	NM_146914	ENSMUSG00000096228	Olfr5	olfactory receptor 5 [Source:MGI Symbol;Acc:MGI:106685]
chr7	140400130	140401044	915	+	1.55871	1.86614	11.2937	0.00077772	NM_146953	ENSMUSG00000062712	Olfr531	olfactory receptor 531 [Source:MGI Symbol;Acc:MGI:3030365]
chr7	103451339	103452298	960	+	-0.88772	3.64245	20.4523	6.11356e-06	NM_147094	ENSMUSG00000073949	Olfr606	olfactory receptor 606 [Source:MGI Symbol;Acc:MGI:3030440]
chr7	140637703	140638638	936	+	1.10011	1.92059	7.71881	0.00546483	NM_146964	ENSMUSG00000096069	Olfr61	olfactory receptor 61 [Source:MGI Symbol;Acc:MGI:1333885]
chr7	103915062	103916550	1489	+	1.09223	2.07471	8.28675	0.00399354	NM_146959	ENSMUSG00000042219	Olfr631	olfactory receptor 631 [Source:MGI Symbol;Acc:MGI:3030465]
chr7	103915062	103916611	1550	+	1.09223	2.07471	8.28675	0.00399354	NM_001271020	ENSMUSG00000042219	Olfr631	olfactory receptor 631 [Source:MGI Symbol;Acc:MGI:3030465]
chr7	104049408	104050352	945	+	1.1803	1.90495	8.34398	0.00386968	NM_146329	ENSMUSG00000049797	Olfr642	olfactory receptor 642 [Source:MGI Symbol;Acc:MGI:3030476]
chr7	104617657	104618646	990	+	1.39894	2.03234	9.13624	0.00250596	NM_147075	ENSMUSG00000073924	Olfr656	olfactory receptor 656 [Source:MGI Symbol;Acc:MGI:3030490]
chr7	105069469	105070410	942	+	1.51087	1.63999	10.1943	0.00140877	NM_146758	ENSMUSG00000073913	Olfr678	olfactory receptor 678 [Source:MGI Symbol;Acc:MGI:3030512]
chr7	105368328	105369317	990	+	1.25574	1.70301	8.01264	0.00464519	NM_146355	ENSMUSG00000073906	Olfr692	olfactory receptor 692 [Source:MGI Symbol;Acc:MGI:3030526]
chr9	39510783	39511718	936	+	1.30983	1.6295	7.80016	0.00522417	NM_146745	ENSMUSG00000095322	Olfr957	olfactory receptor 957 [Source:MGI Symbol;Acc:MGI:3030791]
chr2	85330967	85331896	930	+	1.51871	1.89888	13.2788	0.000268428	NM_001011785	ENSMUSG00000075223	Olfr987	olfactory receptor 987 [Source:MGI Symbol;Acc:MGI:3030821]
chr17	42556783	42558606	1824	+	0.690711	3.09617	7.71615	0.0054729	NM_181753	ENSMUSG00000043972	Opn5	opsin 5 [Source:MGI Symbol;Acc:MGI:2662912]
chr1	53297095	53298940	1846	+	0.921278	2.41641	8.03328	0.00459257	NM_145517	ENSMUSG00000026097	Ormdl1	ORM1-like 1 (S. cerevisiae) [Source:MGI Symbol;Acc:MGI:2181669]
chr15	6813577	6818411	4835	+	0.623258	5.1796	12.2976	0.000453531	NM_011019	ENSMUSG00000022146	Osmr	oncostatin M receptor [Source:MGI Symbol;Acc:MGI:1330819]
chr10	42678916	42681924	3009	+	-0.422082	5.57177	10.6308	0.0011122	NM_172416	ENSMUSG00000038280	Ostm1	osteopetrosis associated transmembrane protein 1 [Source:MGI Symbol;Acc:MGI:2655574]
chr4	138895379	138897048	1670	+	-0.523536	6.0623	12.1835	0.000482128	NM_028453	ENSMUSG00000041161	Otud3	OTU domain containing 3 [Source:MGI Symbol;Acc:MGI:1920412]
chr14	48657677	48659907	2231	+	1.2327	2.35853	13.1357	0.000289715	NM_144841	ENSMUSG00000021848	Otx2	orthodenticle homolog 2 (Drosophila) [Source:MGI Symbol;Acc:MGI:97451]
chr14	54360841	54363374	2534	+	0.389696	4.7558	6.90303	0.008605	NM_026936	ENSMUSG00000000959	Oxa1l	oxidase assembly 1-like [Source:MGI Symbol;Acc:MGI:1916339]
chr5	122643911	122644718	808	+	-0.569066	3.76883	8.81941	0.00298043	NM_001038887	ENSMUSG00000029468	P2rx7	purinergic receptor P2X, ligand-gated ion channel, 7 [Source:MGI Symbol;Acc:MGI:1339957]
chr3	59114623	59116560	1938	+	-0.340241	4.99998	8.03526	0.00458753	NM_133200	ENSMUSG00000036381	P2ry14	purinergic receptor P2Y, G-protein coupled, 14 [Source:MGI Symbol;Acc:MGI:2155705]
chr3	59114623	59116434	1812	+	-0.337901	4.99897	7.92304	0.00488091	NM_001008497	ENSMUSG00000036381	P2ry14	purinergic receptor P2Y, G-protein coupled, 14 [Source:MGI Symbol;Acc:MGI:2155705]
chr9	108578826	108580635	1810	+	0.495209	4.36195	9.44576	0.00211638	NM_028944	ENSMUSG00000006675	P4htm	prolyl 4-hydroxylase, transmembrane (endoplasmic reticulum) [Source:MGI Symbol;Acc:MGI:1921693]
chr10	128557766	128560197	2432	+	0.640555	3.48266	8.31011	0.0039425	NM_011119	ENSMUSG00000025364	Pa2g4	proliferation-associated 2G4 [Source:MGI Symbol;Acc:MGI:894684]
chr17	9666497	9669704	3208	+	-0.412891	6.03225	7.67561	0.00559722	NM_001163836	ENSMUSG00000046173	Pabpc6	poly(A) binding protein, cytoplasmic 6 [Source:MGI Symbol;Acc:MGI:1914793]
chr19	5133685	5138026	4342	+	0.589409	4.08816	10.6151	0.00112169	NM_153129	ENSMUSG00000024855	Pacs1	phosphofurin acidic cluster sorting protein 1 [Source:MGI Symbol;Acc:MGI:1277113]
chr4	140745508	140748147	2640	+	0.315762	5.03166	7.11685	0.00763628	NM_011061	ENSMUSG00000025330	Padi4	peptidyl arginine deiminase, type IV [Source:MGI Symbol;Acc:MGI:1338898]
chr4	134396320	134399487	3168	+	-0.282456	6.38363	7.21684	0.00722227	NM_133880	ENSMUSG00000037366	Pafah2	platelet-activating factor acetylhydrolase 2 [Source:MGI Symbol;Acc:MGI:2140321]
chrX	143563264	143571488	8225	+	0.615425	3.78725	8.96253	0.00275574	NM_008778	ENSMUSG00000031284	Pak3	p21 protein (Cdc42/Rac)-activated kinase 3 [Source:MGI Symbol;Acc:MGI:1339656]
chr8	84021474	84023922	2449	+	0.600575	3.83375	7.22784	0.00717816	NM_028877	ENSMUSG00000047986	Palm3	paralemmin 3 [Source:MGI Symbol;Acc:MGI:1921587]
chr9	37659902	37662419	2518	+	0.851915	3.2395	10.8497	0.000988126	NM_172454	ENSMUSG00000011118	Panx3	pannexin 3 [Source:MGI Symbol;Acc:MGI:1918881]
chr7	140125685	140127421	1737	+	0.603928	3.99338	7.85539	0.00506694	NM_153783	ENSMUSG00000025464	Paox	polyamine oxidase (exo-N4-amino) [Source:MGI Symbol;Acc:MGI:1916983]
chr1	20890622	20895041	4420	+	-0.419788	6.02073	7.43269	0.00640496	NM_028829	ENSMUSG00000025931	Paqr8	progestin and adipoQ receptor family member VIII [Source:MGI Symbol;Acc:MGI:1921479]
chr9	59617284	59619937	2654	+	1.02467	3.37341	11.5471	0.00067855	NM_029922	ENSMUSG00000025237	Parp6	poly (ADP-ribose) polymerase family, member 6 [Source:MGI Symbol;Acc:MGI:1914537]
chr9	59617284	59619997	2714	+	1.0795	3.42737	13.4359	0.000246855	NM_001205239	ENSMUSG00000025237	Parp6	poly (ADP-ribose) polymerase family, member 6 [Source:MGI Symbol;Acc:MGI:1914537]
chr16	35938470	35942033	3564	+	0.608667	4.39147	9.2187	0.00239555	NM_030253	ENSMUSG00000022906	Parp9	poly (ADP-ribose) polymerase family, member 9 [Source:MGI Symbol;Acc:MGI:1933117]
chr7	112427706	112432155	4450	+	0.648482	4.89934	8.53056	0.00349232	NM_020606	ENSMUSG00000030770	Parva	parvin, alpha [Source:MGI Symbol;Acc:MGI:1931144]
chr2	122120108	122122541	2434	+	0.551101	3.87631	7.60456	0.00582209	NM_026251	ENSMUSG00000027233	Patl2	protein associated with topoisomerase II homolog 2 (yeast) [Source:MGI Symbol;Acc:MGI:1914828]
chr14	65805911	65807556	1646	+	1.34734	2.15177	12.6819	0.000369204	NM_023209	ENSMUSG00000022033	Pbk	PDZ binding kinase [Source:MGI Symbol;Acc:MGI:1289156]
chr1	168119364	168123232	3869	+	-0.450812	5.33672	11.0532	0.000885331	NM_008783	ENSMUSG00000052534	Pbx1	pre B cell leukemia homeobox 1 [Source:MGI Symbol;Acc:MGI:97495]
chr1	168153527	168160689	7163	+	-0.356695	5.849	10.5783	0.00114424	NM_183355	ENSMUSG00000052534	Pbx1	pre B cell leukemia homeobox 1 [Source:MGI Symbol;Acc:MGI:97495]
chr14	122534328	122536930	2603	+	0.945592	3.96608	11.8606	0.000573337	NM_144844	ENSMUSG00000041650	Pcca	propionyl-Coenzyme A carboxylase, alpha polypeptide [Source:MGI Symbol;Acc:MGI:97499]
chr18	38196694	38200595	3902	+	-0.479416	7.00894	6.92272	0.00851073	NM_029357	ENSMUSG00000051375	Pcdh1	protocadherin 1 [Source:MGI Symbol;Acc:MGI:104692]
chr18	36939205	36944568	5364	+	-0.445141	6.19657	8.23463	0.00410986	NM_198117	ENSMUSG00000007440	Pcdha2	protocadherin alpha 2 [Source:MGI Symbol;Acc:MGI:2681880]
chr18	37010858	37016111	5254	+	-0.3751	6.2893	7.40182	0.0065158	NM_009960	ENSMUSG00000007440	Pcdha2	protocadherin alpha 2 [Source:MGI Symbol;Acc:MGI:2681880]
chr8	41239759	41248139	8381	+	0.504151	5.03127	6.92731	0.00848893	NM_023662	ENSMUSG00000031592	Pcm1	pericentriolar material 1 [Source:MGI Symbol;Acc:MGI:1277958]
chr2	143546133	143550875	4743	+	0.583809	4.63015	10.1601	0.00143513	NM_008792	ENSMUSG00000027419	Pcsk2	proprotein convertase subtilisin/kexin type 2 [Source:MGI Symbol;Acc:MGI:97512]
chr1	94038305	94040234	1930	+	1.15375	3.06	20.1231	7.26142e-06	NM_008798	ENSMUSG00000026285	Pdcd1	programmed cell death 1 [Source:MGI Symbol;Acc:MGI:104879]
chr5	76312146	76313262	1117	+	0.785356	3.25233	12.7223	0.000361326	NM_023508	ENSMUSG00000029235	Pdcl2	phosducin-like 2 [Source:MGI Symbol;Acc:MGI:1890655]
chr6	56079988	56084105	4118	+	0.76979	4.41482	10.6254	0.00111543	NM_001159956	ENSMUSG00000004347	Pde1c	phosphodiesterase 1C [Source:MGI Symbol;Acc:MGI:108413]
chr6	56079988	56084248	4261	+	0.773195	4.42962	10.9621	0.000929924	NM_001159955	ENSMUSG00000004347	Pde1c	phosphodiesterase 1C [Source:MGI Symbol;Acc:MGI:108413]
chr6	56100440	56108738	8299	+	0.788901	4.85262	12.8171	0.00034346	NM_001159957	ENSMUSG00000004347	Pde1c	phosphodiesterase 1C [Source:MGI Symbol;Acc:MGI:108413]
chr6	56069804	56073710	3907	+	0.854351	4.30087	9.85162	0.00169682	NM_001159953	ENSMUSG00000004347	Pde1c	phosphodiesterase 1C [Source:MGI Symbol;Acc:MGI:108413]
chr6	56100440	56109166	8727	+	1.17342	4.43631	13.5859	0.00022789	NM_001159960	ENSMUSG00000004347	Pde1c	phosphodiesterase 1C [Source:MGI Symbol;Acc:MGI:108413]
chr6	56100440	56109292	8853	+	1.18436	4.44906	14.0881	0.000174443	NM_001025568	ENSMUSG00000004347	Pde1c	phosphodiesterase 1C [Source:MGI Symbol;Acc:MGI:108413]
chr6	56100440	56109265	8826	+	1.19335	4.44058	13.8399	0.000199065	NM_001159952	ENSMUSG00000004347	Pde1c	phosphodiesterase 1C [Source:MGI Symbol;Acc:MGI:108413]
chr6	56079988	56084663	4676	+	1.40618	3.84497	14.0969	0.000173632	NM_011054	ENSMUSG00000004347	Pde1c	phosphodiesterase 1C [Source:MGI Symbol;Acc:MGI:108413]
chr3	97738844	97745043	6200	+	-0.381218	6.83797	8.93795	0.00279305	NM_178080	ENSMUSG00000038170	Pde4dip	phosphodiesterase 4D interacting protein (myomegalin) [Source:MGI Symbol;Acc:MGI:1891434]
chr1	86543015	86544106	1092	+	0.943151	2.98344	11.3679	0.00074725	NM_008801	ENSMUSG00000026239	Pde6d	phosphodiesterase 6D, cGMP-specific, rod, delta [Source:MGI Symbol;Acc:MGI:1270843]
chr6	136954523	136955080	558	+	0.747375	2.94256	7.80481	0.00521074	NM_023898	ENSMUSG00000064330	Pde6h	phosphodiesterase 6H, cGMP-specific, cone, gamma [Source:MGI Symbol;Acc:MGI:1925850]
chr8	111094745	111097648	2904	+	-0.316821	5.812	8.04203	0.00457044	NM_198308	ENSMUSG00000033624	Pdpr	pyruvate dehydrogenase phosphatase regulatory subunit [Source:MGI Symbol;Acc:MGI:2442188]
chr10	43221486	43223066	1581	+	-0.714875	3.91569	8.83716	0.00295158	NM_001168289	ENSMUSG00000038240	Pdss2	prenyl (solanesyl) diphosphate synthase, subunit 2 [Source:MGI Symbol;Acc:MGI:1918615]
chr1	72259173	72260357	1185	+	0.487614	4.39555	7.28357	0.00695881	NM_023523	ENSMUSG00000026189	Pecr	peroxisomal trans-2-enoyl-CoA reductase [Source:MGI Symbol;Acc:MGI:2148199]
chr7	6705960	6712583	6624	+	-0.365067	6.90592	11.4847	0.000701733	NM_008817	ENSMUSG00000002265	Peg3	paternally expressed 3 [Source:MGI Symbol;Acc:MGI:104748]
chr11	59970614	59971616	1003	+	0.981843	2.916	11.9014	0.000560927	NM_008819	ENSMUSG00000000301	Pemt	phosphatidylethanolamine N-methyltransferase [Source:MGI Symbol;Acc:MGI:104535]
chr3	96635430	96637448	2019	+	0.486837	3.93627	6.89285	0.00865412	NM_001162387	ENSMUSG00000028102	Pex11b	peroxisomal biogenesis factor 11 beta [Source:MGI Symbol;Acc:MGI:1338882]
chr3	96635847	96636683	837	+	0.839801	3.0595	12.4418	0.000419834	NM_001162388	ENSMUSG00000028102	Pex11b	peroxisomal biogenesis factor 11 beta [Source:MGI Symbol;Acc:MGI:1338882]
chr11	23646479	23650600	4122	+	1.02833	3.74842	7.52858	0.00607278	NM_023651	ENSMUSG00000020283	Pex13	peroxisomal biogenesis factor 13 [Source:MGI Symbol;Acc:MGI:1919379]
chr2	92375239	92376700	1462	+	0.481133	3.92859	8.80871	0.00299796	NM_145122	ENSMUSG00000027222	Pex16	peroxisomal biogenesis factor 16 [Source:MGI Symbol;Acc:MGI:1338829]
chr2	92374676	92375846	1171	+	0.516763	3.94404	10.1233	0.00146408	NR_028114	ENSMUSG00000027222	Pex16	peroxisomal biogenesis factor 16 [Source:MGI Symbol;Acc:MGI:1338829]
chr3	57841895	57843914	2020	+	1.07388	2.64073	12.3554	0.000439715	NM_019410	ENSMUSG00000027805	Pfn2	profilin 2 [Source:MGI Symbol;Acc:MGI:97550]
chr15	66577572	66584241	6670	+	0.697722	4.26048	9.60563	0.00193981	NM_001081409	ENSMUSG00000072501	Phf20l1	PHD finger protein 20-like 1 [Source:MGI Symbol;Acc:MGI:2444412]
chr11	69995766	69997784	2019	+	-0.317738	5.23298	7.34102	0.00673986	NM_030064	ENSMUSG00000018572	Phf23	PHD finger protein 23 [Source:MGI Symbol;Acc:MGI:1925496]
chrX	151520672	151524403	3732	+	1.13512	2.76627	9.99865	0.00156655	NM_177201	ENSMUSG00000041229	Phf8	PHD finger protein 8 [Source:MGI Symbol;Acc:MGI:2444341]
chr5	52741574	52744716	3143	+	0.952823	3.22987	9.34649	0.00223413	NM_025951	ENSMUSG00000029186	Pi4k2b	phosphatidylinositol 4-kinase type 2 beta [Source:MGI Symbol;Acc:MGI:1914323]
chr5	52741574	52744647	3074	+	1.02347	3.21309	10.7705	0.00103132	NM_028744	ENSMUSG00000029186	Pi4k2b	phosphatidylinositol 4-kinase type 2 beta [Source:MGI Symbol;Acc:MGI:1914323]
chr9	62880077	62883931	3855	+	-0.280743	5.78611	8.95732	0.0027636	NM_019663	ENSMUSG00000032405	Pias1	protein inhibitor of activated STAT 1 [Source:MGI Symbol;Acc:MGI:1913125]
chr1	105518422	105525198	6777	+	0.772443	4.02892	7.55632	0.00598	NM_013784	ENSMUSG00000056536	Pign	phosphatidylinositol glycan anchor biosynthesis, class N [Source:MGI Symbol;Acc:MGI:1351629]
chr19	41274218	41276832	2615	+	-0.315944	6.67909	8.637	0.00329404	NM_031376	ENSMUSG00000025017	Pik3ap1	phosphoinositide-3-kinase adaptor protein 1 [Source:MGI Symbol;Acc:MGI:1933177]
chr9	99038402	99043255	4854	+	-0.201512	6.44311	7.65729	0.00565432	NM_029094	ENSMUSG00000032462	Pik3cb	phosphatidylinositol 3-kinase, catalytic, beta polypeptide [Source:MGI Symbol;Acc:MGI:1922019]
chr11	3330731	3332973	2243	+	0.989504	2.82099	7.16104	0.00745038	NM_178149	ENSMUSG00000034614	Pik3ip1	phosphoinositide-3-kinase interacting protein 1 [Source:MGI Symbol;Acc:MGI:1917016]
chr2	104713926	104715008	1083	+	0.816517	3.43932	11.4291	0.000723018	NM_001033768	ENSMUSG00000074997	Pin1rt1	protein (peptidyl-prolyl cis/trans isomerase) NIMA-interacting 1, retrogene 1 [Source:MGI Symbol;Acc:MGI:3649546]
chr17	3064318	3065802	1485	+	0.661945	4.44047	8.01592	0.0046368	NR_003519	ENSMUSG00000023795	Pisd-ps2	phosphatidylserine decarboxylase, pseudogene 2 [Source:MGI Symbol;Acc:MGI:3612472]
chr17	64281006	64285711	4706	+	0.490681	5.14563	9.95457	0.0016045	NM_001025309	ENSMUSG00000024083	Pja2	praja 2, RING-H2 motif containing [Source:MGI Symbol;Acc:MGI:2159342]
chr17	64281006	64285525	4520	+	0.4907	5.12423	10.2263	0.00138453	NM_144859	ENSMUSG00000024083	Pja2	praja 2, RING-H2 motif containing [Source:MGI Symbol;Acc:MGI:2159342]
chr19	44147637	44150957	3321	+	0.427314	4.89449	7.40584	0.00650125	NM_181422	ENSMUSG00000037578	Pkd2l1	polycystic kidney disease 2-like 1 [Source:MGI Symbol;Acc:MGI:1352448]
chr1	20057779	20070706	12928	+	0.620879	5.13372	7.91985	0.00488952	NM_153179	ENSMUSG00000043760	Pkhd1	polycystic kidney and hepatic disease 1 [Source:MGI Symbol;Acc:MGI:2155808]
chr9	36890979	36894423	3445	+	0.556955	4.46421	9.01804	0.00267328	NM_148950	ENSMUSG00000035934	Pknox2	Pbx/knotted 1 homeobox 2 [Source:MGI Symbol;Acc:MGI:2445415]
chr9	36890979	36894528	3550	+	0.560327	4.47858	9.08712	0.00257416	NM_001029838	ENSMUSG00000035934	Pknox2	Pbx/knotted 1 homeobox 2 [Source:MGI Symbol;Acc:MGI:2445415]
chr2	59160850	59165334	4485	+	-0.27031	6.99329	8.67989	0.00321741	NM_175464	ENSMUSG00000026991	Pkp4	plakophilin 4 [Source:MGI Symbol;Acc:MGI:109281]
chr2	59160850	59165463	4614	+	-0.264972	7.00485	8.48549	0.0035799	NM_026361	ENSMUSG00000026991	Pkp4	plakophilin 4 [Source:MGI Symbol;Acc:MGI:109281]
chr4	138725325	138726942	1618	+	1.05239	2.81125	8.18993	0.00421235	NM_008868	ENSMUSG00000028750	Pla2g2c	phospholipase A2, group IIC [Source:MGI Symbol;Acc:MGI:106638]
chr15	79286228	79289787	3560	+	-0.358287	6.40707	7.28753	0.00694348	NM_001199024	ENSMUSG00000042632	Pla2g6	phospholipase A2, group VI [Source:MGI Symbol;Acc:MGI:1859152]
chr15	79286228	79289292	3065	+	-0.356544	6.4049	7.22913	0.007173	NM_001199025	ENSMUSG00000042632	Pla2g6	phospholipase A2, group VI [Source:MGI Symbol;Acc:MGI:1859152]
chr15	79286228	79289333	3106	+	-0.352927	6.40289	7.05012	0.007926	NM_016915	ENSMUSG00000042632	Pla2g6	phospholipase A2, group VI [Source:MGI Symbol;Acc:MGI:1859152]
chr15	79286228	79289952	3725	+	-0.348137	6.42315	7.07767	0.00780503	NM_001199023	ENSMUSG00000042632	Pla2g6	phospholipase A2, group VI [Source:MGI Symbol;Acc:MGI:1859152]
chr14	25888403	25889755	1353	+	0.36769	4.63721	7.0142	0.00808658	NM_207229	ENSMUSG00000095304	Plac9a	placenta specific 9a [Source:MGI Symbol;Acc:MGI:2663998]
chr14	25887934	25890927	2994	+	0.48152	4.7666	12.7466	0.000356655	NM_001270503	ENSMUSG00000072674	Plac9b	placenta specific 9b [Source:MGI Symbol;Acc:MGI:3711222]
chr16	45959261	45966597	7337	+	0.587139	4.69346	9.13735	0.00250443	NM_001134480	ENSMUSG00000087141	Plcxd2	phosphatidylinositol-specific phospholipase C, X domain containing 2 [Source:MGI Symbol;Acc:MGI:3647874]
chr19	29348677	29349519	843	+	0.560952	3.49415	6.93435	0.00845559	NM_026362	ENSMUSG00000016495	Plgrkt	plasminogen receptor, C-terminal lysine transmembrane protein [Source:MGI Symbol;Acc:MGI:1915009]
chrX	7668116	7668985	870	+	0.789441	2.65399	7.30512	0.00687586	NM_019755	ENSMUSG00000031146	Plp2	proteolipid protein 2 [Source:MGI Symbol;Acc:MGI:1298382]
chr4	94565139	94571953	6815	+	0.949656	3.64601	10.9875	0.000917275	NM_172695	ENSMUSG00000028577	Plaa	phospholipase A2, activating protein [Source:MGI Symbol;Acc:MGI:104810]
chr3	88394143	88395134	992	+	0.778912	3.32319	10.3427	0.00129991	NM_025928	ENSMUSG00000028066	Pmf1	polyamine-modulated factor 1 [Source:MGI Symbol;Acc:MGI:1914287]
chr1	53189189	53192218	3030	+	1.00563	4.05958	7.78052	0.00528125	NM_153556	ENSMUSG00000026098	Pms1	postmeiotic segregation increased 1 (S. cerevisiae) [Source:MGI Symbol;Acc:MGI:1202302]
chr14	50944303	50947243	2941	+	0.992625	3.76358	9.69473	0.00184798	NM_013632	ENSMUSG00000021871	Pnp	purine-nucleoside phosphorylase [Source:MGI Symbol;Acc:MGI:97365]
chr14	50956141	50957363	1223	+	1.30717	2.23794	8.94909	0.00277607	NM_001123371	ENSMUSG00000068417	Pnp2	purine-nucleoside phosphorylase 2 [Source:MGI Symbol;Acc:MGI:3712328]
chr6	31519493	31524822	5330	+	0.649774	4.57309	15.2793	9.27291e-05	NM_013723	ENSMUSG00000025608	Podxl	podocalyxin-like [Source:MGI Symbol;Acc:MGI:1351317]
chrX	93304766	93310112	5347	+	0.708116	3.4916	6.95614	0.00835321	NM_008892	ENSMUSG00000006678	Pola1	polymerase (DNA directed), alpha 1 [Source:MGI Symbol;Acc:MGI:99660]
chr5	147077346	147078482	1137	+	-0.496475	5.13397	7.08365	0.00777906	NM_181730	ENSMUSG00000029642	Polr1d	polymerase (RNA) I polypeptide D [Source:MGI Symbol;Acc:MGI:108403]
chr10	84622437	84627266	4830	+	-0.241959	6.68385	8.49415	0.0035629	NM_027423	ENSMUSG00000034453	Polr3b	polymerase (RNA) III (DNA directed) polypeptide B [Source:MGI Symbol;Acc:MGI:1917678]
chr12	87106866	87111924	5059	+	0.646801	3.87326	10.566	0.00115188	NM_153415	ENSMUSG00000034126	Pomt2	protein-O-mannosyltransferase 2 [Source:MGI Symbol;Acc:MGI:2444430]
chr8	27447670	27449375	1706	+	-0.313888	4.99541	7.5228	0.00609228	NM_027618	ENSMUSG00000063932	Poteg	POTE ankyrin domain family, member G [Source:MGI Symbol;Acc:MGI:1918202]
chr4	105157347	105160508	3162	+	-0.440639	5.90429	8.71462	0.00315668	NM_080555	ENSMUSG00000028517	Ppap2b	phosphatidic acid phosphatase type 2B [Source:MGI Symbol;Acc:MGI:1915166]
chr15	85735776	85743220	7445	+	-0.280298	6.59064	7.42372	0.00643697	NM_011144	ENSMUSG00000022383	Ppara	peroxisome proliferator activated receptor alpha [Source:MGI Symbol;Acc:MGI:104740]
chr15	85735564	85742770	7207	+	-0.276993	6.58884	7.21013	0.00724932	NM_001113418	ENSMUSG00000022383	Ppara	peroxisome proliferator activated receptor alpha [Source:MGI Symbol;Acc:MGI:104740]
chr18	53406341	53407626	1286	+	0.811059	2.94822	8.13972	0.00433059	NM_008908	ENSMUSG00000024538	Ppic	peptidylprolyl isomerase C [Source:MGI Symbol;Acc:MGI:97751]
chr17	35866128	35868798	2671	+	0.776179	3.074	9.94722	0.00161093	NM_001146710	ENSMUSG00000034595	Ppp1r18	protein phosphatase 1, regulatory subunit 18 [Source:MGI Symbol;Acc:MGI:1923698]
chr17	35866615	35869799	3185	+	0.788485	3.08206	10.7174	0.00106131	NM_175242	ENSMUSG00000034595	Ppp1r18	protein phosphatase 1, regulatory subunit 18 [Source:MGI Symbol;Acc:MGI:1923698]
chr17	35865595	35868264	2670	+	0.789763	3.08978	10.7461	0.00104499	NM_001146711	ENSMUSG00000034595	Ppp1r18	protein phosphatase 1, regulatory subunit 18 [Source:MGI Symbol;Acc:MGI:1923698]
chr17	88530124	88533258	3135	+	-0.288386	6.61814	11.2347	0.000802842	NM_028658	ENSMUSG00000034709	Ppp1r21	protein phosphatase 1, regulatory subunit 21 [Source:MGI Symbol;Acc:MGI:1921075]
chr19	10474257	10475714	1458	+	0.835493	3.06382	8.68781	0.00320345	NM_133689	ENSMUSG00000035179	Ppp1r32	protein phosphatase 1, regulatory subunit 32 [Source:MGI Symbol;Acc:MGI:1915002]
chr8	35375741	35379959	4219	+	-0.289563	5.56134	9.15941	0.00247442	NM_177741	ENSMUSG00000046794	Ppp1r3b	protein phosphatase 1, regulatory (inhibitor) subunit 3B [Source:MGI Symbol;Acc:MGI:2177268]
chr19	36731731	36734406	2676	+	-0.325523	4.91128	8.00336	0.00466907	NM_016854	ENSMUSG00000067279	Ppp1r3c	protein phosphatase 1, regulatory (inhibitor) subunit 3C [Source:MGI Symbol;Acc:MGI:1858229]
chr9	124474346	124476862	2517	+	-0.411022	5.45157	10.5122	0.00118588	NM_001163415	ENSMUSG00000093803	Ppp2r3d	protein phosphatase 2 (formerly 2A), regulatory subunit B'', delta [Source:MGI Symbol;Acc:MGI:1335093]
chr2	30416050	30418626	2577	+	0.784784	3.58081	12.9607	0.00031809	NM_138748	ENSMUSG00000039515	Ppp2r4	protein phosphatase 2A, regulatory subunit B (PR 53) [Source:MGI Symbol;Acc:MGI:1346006]
chr7	126785868	126787199	1332	+	0.933016	2.9984	9.78258	0.00176173	NM_019674	ENSMUSG00000030697	Ppp4c	protein phosphatase 4, catalytic subunit [Source:MGI Symbol;Acc:MGI:1891763]
chr6	100833638	100837278	3641	+	1.14337	2.99598	9.62881	0.00191548	NM_182939	ENSMUSG00000052144	Ppp4r2	protein phosphatase 4, regulatory subunit 2 [Source:MGI Symbol;Acc:MGI:3027896]
chr19	3454929	3459598	4670	+	0.49668	5.41858	14.4104	0.000146987	NM_001164159	ENSMUSG00000024908	Ppp6r3	protein phosphatase 6, regulatory subunit 3 [Source:MGI Symbol;Acc:MGI:1921807]
chr19	3454929	3459884	4956	+	0.504686	5.43191	14.1695	0.000167057	NM_028999	ENSMUSG00000024908	Ppp6r3	protein phosphatase 6, regulatory subunit 3 [Source:MGI Symbol;Acc:MGI:1921807]
chr19	3454929	3459797	4869	+	0.506586	5.42925	14.3073	0.000155263	NM_029456	ENSMUSG00000024908	Ppp6r3	protein phosphatase 6, regulatory subunit 3 [Source:MGI Symbol;Acc:MGI:1921807]
chrX	135613002	135615268	2267	+	0.656119	3.37515	9.77068	0.00177317	NM_029459	ENSMUSG00000031411	Prame	preferentially expressed antigen in melanoma [Source:MGI Symbol;Acc:MGI:1923079]
chr10	45067214	45069932	2719	+	-0.329112	7.00816	8.53625	0.00348143	NM_011156	ENSMUSG00000019849	Prep	prolyl endopeptidase [Source:MGI Symbol;Acc:MGI:1270863]
chr16	15637866	15650539	12674	+	0.482268	6.24971	7.6341	0.00572749	NM_011159	ENSMUSG00000022672	Prkdc	protein kinase, DNA activated, catalytic polypeptide [Source:MGI Symbol;Acc:MGI:104779]
chr5	136180357	136182010	1654	+	0.747882	3.7376	6.92282	0.00851028	NM_025774	ENSMUSG00000039737	Prkrip1	Prkr interacting protein 1 (IL11 inducible) [Source:MGI Symbol;Acc:MGI:1914051]
chr13	27383345	27384208	864	+	1.00706	2.15802	7.72158	0.00545645	NM_025532	ENSMUSG00000069258	Prl2b1	prolactin family 2, subfamily b, member 1 [Source:MGI Symbol;Acc:MGI:1861444]
chr13	27849342	27850107	766	+	1.35169	1.93809	8.9687	0.00274644	NM_001045532	ENSMUSG00000062551	Prl2c1	Prolactin family 2, subfamily c, member 1 [Source:MGI Symbol;Acc:MGI:3649927]
chr13	27094189	27095066	878	+	0.89469	2.60283	7.18434	0.00735424	NM_001205322	ENSMUSG00000057170	Prl3d1	prolactin family 3, subfamily d, member 1 [Source:MGI Symbol;Acc:MGI:97606]
chr13	27094189	27095063	875	+	0.89469	2.60283	7.18434	0.00735424	NM_008864	ENSMUSG00000057170	Prl3d1	prolactin family 3, subfamily d, member 1 [Source:MGI Symbol;Acc:MGI:97606]
chr13	27507072	27507963	892	+	1.64294	1.84458	12.4866	0.000409883	NM_023741	ENSMUSG00000021346	Prl8a8	prolactin family 8, subfamily a, member 81 [Source:MGI Symbol;Acc:MGI:1921438]
chr6	87578592	87582647	4056	+	-0.337195	6.14366	7.04717	0.00793906	NM_021381	ENSMUSG00000049409	Prokr1	prokineticin receptor 1 [Source:MGI Symbol;Acc:MGI:1929676]
chr2	132370329	132374861	4533	+	-0.498202	5.89119	10.9761	0.000922944	NM_144944	ENSMUSG00000050558	Prokr2	prokineticin receptor 2 [Source:MGI Symbol;Acc:MGI:2181363]
chr8	13060908	13063305	2398	+	-0.336207	5.86908	11.8193	0.000586188	NM_025834	ENSMUSG00000031445	Proz	protein Z, vitamin K-dependent plasma glycoprotein [Source:MGI Symbol;Acc:MGI:1860488]
chr7	127471614	127473891	2278	+	-0.422672	4.44115	8.77	0.00306225	NM_145589	ENSMUSG00000030822	Prr14	proline rich 14 [Source:MGI Symbol;Acc:MGI:2384565]
chr18	57354733	57359533	4801	+	-0.300649	6.43553	7.17155	0.00740688	NM_028447	ENSMUSG00000024594	Prrc1	proline-rich coiled-coil 1 [Source:MGI Symbol;Acc:MGI:1916106]
chr9	86743633	86746155	2523	+	-0.361215	5.8612	7.5759	0.00591537	NM_178738	ENSMUSG00000033491	Prss35	protease, serine, 35 [Source:MGI Symbol;Acc:MGI:2444800]
chr10	79879667	79880636	970	+	-0.539302	4.03974	10.802	0.00101389	NM_011178	ENSMUSG00000057729	Prtn3	proteinase 3 [Source:MGI Symbol;Acc:MGI:893580]
chr7	18718090	18719960	1871	+	0.921407	2.71176	10.9232	0.000949662	NM_001004152	ENSMUSG00000044903	Psg22	pregnancy-specific glycoprotein 22 [Source:MGI Symbol;Acc:MGI:1891354]
chr7	18519702	18522768	3067	+	0.788421	3.26186	6.90318	0.00860426	NM_054060	ENSMUSG00000070798	Psg25	pregnancy-specific glycoprotein 25 [Source:MGI Symbol;Acc:MGI:1891357]
chr7	114264550	114265804	1255	+	1.52968	2.56603	11.4651	0.000709146	NM_011965	ENSMUSG00000030751	Psma1	proteasome (prosome, macropain) subunit, alpha type 1 [Source:MGI Symbol;Acc:MGI:1347005]
chr17	34198195	34199417	1223	+	-0.357582	4.94394	7.23026	0.0071685	NM_010724	ENSMUSG00000024338	Psmb8	proteasome (prosome, macropain) subunit, beta type 8 (large multifunctional peptidase 7) [Source:MGI Symbol;Acc:MGI:1346527]
chr5	21785283	21787064	1782	+	-0.360756	5.71312	9.89244	0.00165959	NM_011188	ENSMUSG00000028932	Psmc2	proteasome (prosome, macropain) 26S subunit, ATPase 2 [Source:MGI Symbol;Acc:MGI:109555]
chr14	45329824	45331387	1564	+	1.11624	2.65969	8.47167	0.00360719	NM_025959	ENSMUSG00000021832	Psmc6	proteasome (prosome, macropain) 26S subunit, ATPase, 6 [Source:MGI Symbol;Acc:MGI:1914339]
chrX	140948425	140949801	1377	+	0.887674	2.33012	7.0523	0.00791634	NM_001164177	ENSMUSG00000031429	Psmd10	proteasome (prosome, macropain) 26S subunit, non-ATPase, 10 [Source:MGI Symbol;Acc:MGI:1858898]
chrX	140948425	140949880	1456	+	0.887674	2.33012	7.0523	0.00791634	NM_016883	ENSMUSG00000031429	Psmd10	proteasome (prosome, macropain) 26S subunit, non-ATPase, 10 [Source:MGI Symbol;Acc:MGI:1858898]
chr7	131371146	131372274	1129	+	0.807555	2.79009	6.94406	0.00840982	NM_001039534	ENSMUSG00000063179	Pstk	phosphoseryl-tRNA kinase [Source:MGI Symbol;Acc:MGI:2685945]
chr17	42315947	42322836	6890	+	0.816473	3.73355	8.49835	0.00355468	NM_028474	ENSMUSG00000042256	Ptchd4	patched domain containing 4 [Source:MGI Symbol;Acc:MGI:1920485]
chr19	32757577	32765788	8212	+	0.668247	4.75207	9.79578	0.00174912	NM_008960	ENSMUSG00000013663	Pten	phosphatase and tensin homolog [Source:MGI Symbol;Acc:MGI:109583]
chr2	12924041	12927660	3620	+	0.861774	3.58085	12.671	0.000371369	NM_008961	ENSMUSG00000026730	Pter	phosphotriesterase related [Source:MGI Symbol;Acc:MGI:107372]
chr12	84285296	84288528	3233	+	0.669096	3.66536	7.65853	0.00565044	NM_001252626	ENSMUSG00000072946	Ptgr2	prostaglandin reductase 2 [Source:MGI Symbol;Acc:MGI:1916372]
chr12	84285296	84288456	3161	+	0.703707	3.62418	8.64278	0.00328359	NM_001252625	ENSMUSG00000072946	Ptgr2	prostaglandin reductase 2 [Source:MGI Symbol;Acc:MGI:1916372]
chr12	84285296	84288399	3104	+	0.703707	3.62418	8.64278	0.00328359	NM_029880	ENSMUSG00000072946	Ptgr2	prostaglandin reductase 2 [Source:MGI Symbol;Acc:MGI:1916372]
chr2	181195124	181197409	2286	+	-0.617362	3.91125	9.73398	0.00180892	NM_009184	ENSMUSG00000038751	Ptk6	PTK6 protein tyrosine kinase 6 [Source:MGI Symbol;Acc:MGI:99683]
chr1	86526736	86527927	1192	+	-0.570069	3.3673	7.13111	0.0075758	NM_008972	ENSMUSG00000026238	Ptma	prothymosin alpha [Source:MGI Symbol;Acc:MGI:97803]
chr16	35022421	35026023	3603	+	0.843371	4.16482	15.375	8.81446e-05	NM_023587	ENSMUSG00000035376	Ptplb	protein tyrosine phosphatase-like (proline instead of catalytic arginine), member b [Source:MGI Symbol;Acc:MGI:1918007]
chr5	121130533	121136131	5599	+	-0.281914	6.48001	7.44578	0.00635854	NM_001109992	ENSMUSG00000043733	Ptpn11	protein tyrosine phosphatase, non-receptor type 11 [Source:MGI Symbol;Acc:MGI:99511]
chr5	121130533	121136143	5611	+	-0.281914	6.48001	7.44578	0.00635854	NM_011202	ENSMUSG00000043733	Ptpn11	protein tyrosine phosphatase, non-receptor type 11 [Source:MGI Symbol;Acc:MGI:99511]
chr5	103425192	103433473	8282	+	-0.176264	7.60414	8.74313	0.00310771	NM_011204	ENSMUSG00000034573	Ptpn13	protein tyrosine phosphatase, non-receptor type 13 [Source:MGI Symbol;Acc:MGI:103293]
chr1	34459746	34461318	1573	+	0.70153	3.8348	8.75968	0.00307963	NM_011206	ENSMUSG00000026126	Ptpn18	protein tyrosine phosphatase, non-receptor type 18 [Source:MGI Symbol;Acc:MGI:108410]
chr1	138062859	138068426	5568	+	1.0173	3.97558	9.93169	0.00162457	NM_001111316	ENSMUSG00000026395	Ptprc	protein tyrosine phosphatase, receptor type, C [Source:MGI Symbol;Acc:MGI:97810]
chr1	138062859	138068107	5249	+	1.11408	3.78099	10.2543	0.00136363	NM_011210	ENSMUSG00000026395	Ptprc	protein tyrosine phosphatase, receptor type, C [Source:MGI Symbol;Acc:MGI:97810]
chr1	138062859	138068035	5177	+	1.12794	3.77613	10.5702	0.00114926	NM_001268286	ENSMUSG00000026395	Ptprc	protein tyrosine phosphatase, receptor type, C [Source:MGI Symbol;Acc:MGI:97810]
chr8	33386325	33388121	1797	+	0.626158	3.20208	7.83061	0.00513688	NM_001098233	ENSMUSG00000049184	Purg	purine-rich element binding protein G [Source:MGI Symbol;Acc:MGI:1922279]
chr15	94522640	94525487	2848	+	-0.369079	6.75559	8.76195	0.0030758	NM_172437	ENSMUSG00000033356	Pus7l	pseudouridylate synthase 7 homolog (S. cerevisiae)-like [Source:MGI Symbol;Acc:MGI:1926145]
chr7	19716644	19719378	2735	+	-0.427497	5.89889	7.29756	0.00690484	NM_008990	ENSMUSG00000062300	Pvrl2	poliovirus receptor-related 2 [Source:MGI Symbol;Acc:MGI:97822]
chr16	46447161	46450230	3070	+	0.592954	3.98784	9.43774	0.00212565	NM_021495	ENSMUSG00000022656	Pvrl3	poliovirus receptor-related 3 [Source:MGI Symbol;Acc:MGI:1930171]
chr9	72925650	72927394	1745	+	-0.467528	5.76128	7.64462	0.00569418	NM_028116	ENSMUSG00000034910	Pygo1	pygopus 1 [Source:MGI Symbol;Acc:MGI:1919385]
chr1	173630859	173634355	3497	+	1.22574	3.21681	14.6654	0.00012838	NM_175026	ENSMUSG00000043263	Pyhin1	pyrin and HIN domain family, member 1 [Source:MGI Symbol;Acc:MGI:2138243]
chr2	26209130	26211578	2449	+	0.705061	3.37598	7.06153	0.00787569	NM_153559	ENSMUSG00000036327	Qsox2	quiescin Q6 sulfhydryl oxidase 2 [Source:MGI Symbol;Acc:MGI:2387194]
chr2	35180205	35183285	3081	+	0.862103	2.98264	7.13346	0.00756588	NM_026697	ENSMUSG00000026878	Rab14	RAB14, member RAS oncogene family [Source:MGI Symbol;Acc:MGI:1915615]
chr18	69979131	69986107	6977	+	0.770623	3.71147	7.06976	0.00783959	NM_030554	ENSMUSG00000024511	Rab27b	RAB27b, member RAS oncogene family [Source:MGI Symbol;Acc:MGI:1931295]
chr18	69979131	69986006	6876	+	0.827306	3.72124	8.19381	0.00420336	NM_001082553	ENSMUSG00000024511	Rab27b	RAB27b, member RAS oncogene family [Source:MGI Symbol;Acc:MGI:1931295]
chr4	8535644	8537700	2057	+	0.762014	3.90029	10.804	0.00101283	NM_021518	ENSMUSG00000047187	Rab2a	RAB2A, member RAS oncogene family [Source:MGI Symbol;Acc:MGI:1928750]
chr10	10545039	10547092	2054	+	0.780917	2.98635	8.24454	0.00408747	NM_026405	ENSMUSG00000019832	Rab32	RAB32, member RAS oncogene family [Source:MGI Symbol;Acc:MGI:1915094]
chr1	127868773	127873023	4251	+	0.376808	5.31044	10.5068	0.00118939	NM_178690	ENSMUSG00000036104	Rab3gap1	RAB3 GTPase activating protein subunit 1 [Source:MGI Symbol;Acc:MGI:2445001]
chr2	37443285	37448251	4967	+	0.838151	3.85854	10.9475	0.000937294	NM_146121	ENSMUSG00000035437	Rabgap1	RAB GTPase activating protein 1 [Source:MGI Symbol;Acc:MGI:2385139]
chr2	37452254	37456491	4238	+	0.885082	3.65807	11.7027	0.000624084	NM_001033960	ENSMUSG00000035437	Rabgap1	RAB GTPase activating protein 1 [Source:MGI Symbol;Acc:MGI:2385139]
chr15	99620496	99623425	2930	+	-0.231037	6.02661	7.41034	0.00648501	NM_001253809	ENSMUSG00000023015	Racgap1	Rac GTPase-activating protein 1 [Source:MGI Symbol;Acc:MGI:1349423]
chr15	99620496	99623429	2934	+	-0.230494	6.02757	7.3604	0.00666761	NM_001253808	ENSMUSG00000023015	Racgap1	Rac GTPase-activating protein 1 [Source:MGI Symbol;Acc:MGI:1349423]
chr15	10568978	10573791	4814	+	-0.364307	6.80316	11.8396	0.000579829	NM_001166408	ENSMUSG00000022246	Rai14	retinoic acid induced 14 [Source:MGI Symbol;Acc:MGI:1922896]
chr15	10568978	10573877	4900	+	-0.325811	6.9042	9.38813	0.00218395	NM_030690	ENSMUSG00000022246	Rai14	retinoic acid induced 14 [Source:MGI Symbol;Acc:MGI:1922896]
chr2	146241299	146250908	9610	+	0.465898	5.66648	10.7136	0.0010635	NM_001033348	ENSMUSG00000037110	Ralgapa2	Ral GTPase activating protein, alpha subunit 2 (catalytic) [Source:MGI Symbol;Acc:MGI:3036245]
chr1	156804166	156811052	6887	+	-0.276561	6.25628	8.68732	0.00320432	NM_001159968	ENSMUSG00000026594	Ralgps2	Ral GEF with PH domain and SH3 binding motif 2 [Source:MGI Symbol;Acc:MGI:1925505]
chr1	156804166	156811157	6992	+	-0.255384	6.28335	7.74991	0.00537151	NM_001159965	ENSMUSG00000026594	Ralgps2	Ral GEF with PH domain and SH3 binding motif 2 [Source:MGI Symbol;Acc:MGI:1925505]
chr1	156804166	156811055	6890	+	-0.255384	6.28335	7.74991	0.00537151	NM_001159966	ENSMUSG00000026594	Ralgps2	Ral GEF with PH domain and SH3 binding motif 2 [Source:MGI Symbol;Acc:MGI:1925505]
chr1	156804166	156811097	6932	+	-0.249478	6.27528	7.45108	0.00633984	NM_023884	ENSMUSG00000026594	Ralgps2	Ral GEF with PH domain and SH3 binding motif 2 [Source:MGI Symbol;Acc:MGI:1925505]
chr3	105727260	105729718	2459	+	1.4321	2.3104	13.4653	0.000243017	NM_145541	ENSMUSG00000068798	Rap1a	RAS-related protein-1a [Source:MGI Symbol;Acc:MGI:97852]
chr14	120478461	120482632	4172	+	-0.304687	5.74856	7.67931	0.00558575	NM_029519	ENSMUSG00000051615	Rap2a	RAS related protein 2a [Source:MGI Symbol;Acc:MGI:97855]
chrX	51003914	51007456	3543	+	1.08571	2.63453	11.6953	0.000626595	NM_172413	ENSMUSG00000050029	Rap2c	RAP2C, member of RAS oncogene family [Source:MGI Symbol;Acc:MGI:1919315]
chr11	54522845	54530772	7928	+	0.486388	5.09636	9.98468	0.00157848	NM_001252496	ENSMUSG00000037533	Rapgef6	Rap guanine nucleotide exchange factor (GEF) 6 [Source:MGI Symbol;Acc:MGI:2384761]
chr11	54522845	54531036	8192	+	0.506232	5.1806	12.0297	0.000523594	NM_175258	ENSMUSG00000037533	Rapgef6	Rap guanine nucleotide exchange factor (GEF) 6 [Source:MGI Symbol;Acc:MGI:2384761]
chr11	54522845	54531051	8207	+	0.507108	5.18648	11.7564	0.000606341	NM_001252494	ENSMUSG00000037533	Rapgef6	Rap guanine nucleotide exchange factor (GEF) 6 [Source:MGI Symbol;Acc:MGI:2384761]
chr13	85214699	85219799	5101	+	0.976871	4.03922	10.4058	0.00125623	NM_145452	ENSMUSG00000021549	Rasa1	RAS p21 protein activator 1 [Source:MGI Symbol;Acc:MGI:97860]
chr9	107551555	107553341	1787	+	-0.503688	5.37485	7.14262	0.00752731	NM_001243748	ENSMUSG00000010067	Rassf1	Ras association (RalGDS/AF-6) domain family member 1 [Source:MGI Symbol;Acc:MGI:1928386]
chr9	107554583	107556313	1731	+	-0.494166	5.3742	6.95586	0.00835452	NM_019713	ENSMUSG00000010067	Rassf1	Ras association (RalGDS/AF-6) domain family member 1 [Source:MGI Symbol;Acc:MGI:1928386]
chr7	112953962	112957458	3497	+	0.70933	2.92306	7.25699	0.00706258	NM_175279	ENSMUSG00000098132	Rassf10	Ras association (RalGDS/AF-6) domain family (N-terminal) member 10 [Source:MGI Symbol;Acc:MGI:1925998]
chr5	143172186	143175565	3380	+	-0.30513	6.15857	10.1485	0.00144416	NM_001045482	ENSMUSG00000061898	Rbak	RB-associated KRAB repressor [Source:MGI Symbol;Acc:MGI:1927369]
chr5	143172186	143175665	3480	+	-0.297362	6.16425	9.83927	0.00170825	NM_021326	ENSMUSG00000061898	Rbak	RB-associated KRAB repressor [Source:MGI Symbol;Acc:MGI:1927369]
chr2	144542265	144544424	2160	+	1.03094	2.51742	7.91608	0.00489973	NM_015754	ENSMUSG00000027428	Rbbp9	retinoblastoma binding protein 9 [Source:MGI Symbol;Acc:MGI:1347074]
chr5	31624439	31625463	1025	+	0.969939	2.28571	8.29169	0.00398269	NM_153196	ENSMUSG00000029136	Rbks	ribokinase [Source:MGI Symbol;Acc:MGI:1918586]
chr19	4784293	4786902	2610	+	-0.473304	5.55561	8.87038	0.00289836	NM_009032	ENSMUSG00000094936	Rbm4	RNA binding motif protein 4 [Source:MGI Symbol;Acc:MGI:1100865]
[truncated: 927 more rows]
