# Supplementary material for: Ionizing Radiation Potentiates High-Fat Diet–Induced Insulin Resistance and Reprograms Skeletal Muscle and Adipose Progenitor Cells
Source: Oxford University Press journal article supplement (doi:10.2337/db16-0364), 2016-09-20
Supplement: db160364supplementarydata4.xlsx [file db160364supplementarydata4.xlsx]

## Sheet: Radiation
	seqnames	start	end	width	strand	median.p	median.meth.group1	median.meth.group2	median.meth.diff	annotation	geneChr	geneStart	geneEnd	geneLength	geneStrand	geneId	transcriptId	distanceToTSS	ENSEMBL	SYMBOL	GENENAME
1	chr1	4807872	4807872	1	*	0.000118821	0.0054345	0.260872	-0.255437	Promoter (<=1kb)	chr1	4807893	4842827	34935	+	18777	uc007afg.1	-21	ENSMUSG00000025903	Lypla1	lysophospholipase 1
2	chr1	4807884	4807884	1	*	0.00471935	0.00585244	0.000279202	0.00557324	Promoter (<=1kb)	chr1	4807893	4842827	34935	+	18777	uc007afg.1	-9	ENSMUSG00000025903	Lypla1	lysophospholipase 1
3	chr1	4807890	4807919	30	*	0.000323124	0.00618824	0.242104	-0.235915	Promoter (<=1kb)	chr1	4807893	4842827	34935	+	18777	uc007afg.1	0	ENSMUSG00000025903	Lypla1	lysophospholipase 1
4	chr1	4807934	4807939	6	*	0.000749296	0.00297137	0.000110823	0.00286055	Promoter (<=1kb)	chr1	4807893	4842827	34935	+	18777	uc007afg.1	46	ENSMUSG00000025903	Lypla1	lysophospholipase 1
5	chr1	4807946	4807946	1	*	3.32097e-08	0.00207535	0.313851	-0.311775	Promoter (<=1kb)	chr1	4807893	4842827	34935	+	18777	uc007afg.1	53	ENSMUSG00000025903	Lypla1	lysophospholipase 1
6	chr1	4807949	4807957	9	*	0.00111274	0.00570673	0.000230177	0.00547656	Promoter (<=1kb)	chr1	4807893	4842827	34935	+	18777	uc007afg.1	64	ENSMUSG00000025903	Lypla1	lysophospholipase 1
7	chr1	4858282	4858319	38	*	2.66057e-06	0.0247043	0.00058109	0.0242455	Promoter (<=1kb)	chr1	4858328	4897909	39582	+	21399	uc011whu.1	-46	ENSMUSG00000033813	Tcea1	transcription elongation factor A (SII) 1
8	chr1	5019439	5019457	19	*	1.84336e-09	0.00160678	0.342995	-0.341388	Promoter (<=1kb)	chr1	4909576	5019539	109964	-	58175	uc007afk.3	82	ENSMUSG00000002459	Rgs20	regulator of G-protein signaling 20
9	chr1	5916797	5916894	98	*	5.91716e-05	0.184492	0.0103418	0.174171	Promoter (<=1kb)	chr1	5913707	5917398	3692	-	226304	uc011whw.1	504	ENSMUSG00000033774	Npbwr1	neuropeptides B/W receptor 1
10	chr1	7398165	7398232	68	*	2.05648e-07	0.00725228	5.18679e-05	0.0072011	Distal Intergenic	chr1	7160085	7173628	13544	+	319263	uc007agd.1	238147	ENSMUSG00000051285	Pcmtd1	protein-L-isoaspartate (D-aspartate) O-methyltransferase domain containing 1
11	chr1	9545377	9545492	116	*	5.4353e-12	0.343263	0.000691379	0.342572	Promoter (<=1kb)	chr1	9545408	9547455	2048	+	59014	uc007agk.2	0	ENSMUSG00000061024	Rrs1	RRS1 ribosome biogenesis regulator homolog (S. cerevisiae)
12	chr1	9545784	9545802	19	*	1.15893e-07	0.00415273	0.333089	-0.328937	Promoter (<=1kb)	chr1	9545408	9547455	2048	+	59014	uc007agk.2	394	ENSMUSG00000061024	Rrs1	RRS1 ribosome biogenesis regulator homolog (S. cerevisiae)
13	chr1	9798348	9798361	14	*	8.55358e-05	2.42893e-05	0.000460686	-0.000436397	Promoter (<=1kb)	chr1	9798130	9902568	104439	+	170755	uc007agu.1	231	ENSMUSG00000025915	Sgk3	serum/glucocorticoid regulated kinase 3
14	chr1	9798362	9798365	4	*	1.1139e-12	0.396087	0.00042742	0.39566	Promoter (<=1kb)	chr1	9798130	9902568	104439	+	170755	uc007agu.1	235	ENSMUSG00000025915	Sgk3	serum/glucocorticoid regulated kinase 3
15	chr1	9798369	9798369	1	*	7.36276e-05	2.47572e-05	0.000511605	-0.000486848	Promoter (<=1kb)	chr1	9798130	9902568	104439	+	170755	uc007agu.1	239	ENSMUSG00000025915	Sgk3	serum/glucocorticoid regulated kinase 3
16	chr1	9798370	9798370	1	*	1.56229e-12	0.395952	0.00045004	0.395502	Promoter (<=1kb)	chr1	9798130	9902568	104439	+	170755	uc007agu.1	240	ENSMUSG00000025915	Sgk3	serum/glucocorticoid regulated kinase 3
17	chr1	9798382	9798387	6	*	6.33408e-05	2.57076e-05	0.000596331	-0.000570624	Promoter (<=1kb)	chr1	9798130	9902568	104439	+	170755	uc007agu.1	257	ENSMUSG00000025915	Sgk3	serum/glucocorticoid regulated kinase 3
18	chr1	9798394	9798406	13	*	9.74744e-12	0.394962	0.000597755	0.394366	Promoter (<=1kb)	chr1	9798130	9902568	104439	+	170755	uc007agu.1	276	ENSMUSG00000025915	Sgk3	serum/glucocorticoid regulated kinase 3
19	chr1	9798675	9798675	1	*	0.0093477	0.0162476	0.00149295	0.0147546	Promoter (<=1kb)	chr1	9798130	9902568	104439	+	170755	uc007agu.1	545	ENSMUSG00000025915	Sgk3	serum/glucocorticoid regulated kinase 3
20	chr1	10039676	10039712	37	*	1.39379e-05	0.00010364	0.00432745	-0.00422381	Promoter (<=1kb)	chr1	10039773	10067976	28204	+	211660	uc007ahj.1	-97	ENSMUSG00000056763	Cspp1	centrosome and spindle pole associated protein 1
21	chr1	13125215	13125253	39	*	9.96308e-05	0.178916	0.321533	-0.142617	Promoter (1-2kb)	chr1	13113428	13127163	13736	-	383491	uc007aik.1	1910	ENSMUSG00000042414	Prdm14	PR domain containing 14
22	chr1	13128390	13128413	24	*	0.000281871	0.0578669	0.196897	-0.13903	Promoter (1-2kb)	chr1	13113428	13127163	13736	-	383491	uc007aik.1	-1227	ENSMUSG00000042414	Prdm14	PR domain containing 14
23	chr1	13373599	13373776	178	*	1.21334e-06	0.000309694	0.00945895	-0.00914926	Promoter (<=1kb)	chr1	13139105	13374083	234979	-	17978	uc007aim.2	307	ENSMUSG00000005886	Ncoa2	nuclear receptor coactivator 2
24	chr1	13373826	13373826	1	*	4.06649e-06	0.00310635	5.44805e-05	0.00305187	Promoter (<=1kb)	chr1	13139105	13374083	234979	-	17978	uc007aim.2	257	ENSMUSG00000005886	Ncoa2	nuclear receptor coactivator 2
25	chr1	13374214	13374222	9	*	8.67501e-11	0.00117146	0.346528	-0.345356	Promoter (<=1kb)	chr1	13139105	13374083	234979	-	17978	uc007aim.2	-131	ENSMUSG00000005886	Ncoa2	nuclear receptor coactivator 2
26	chr1	13589452	13589493	42	*	0.000399773	2.28723e-05	2.28723e-05	-2.57498e-19	Promoter (<=1kb)	chr1	13564693	13589910	25218	-	72265	uc007ait.2	417	ENSMUSG00000025935	Tram1	translocating chain-associating membrane protein 1
27	chr1	15805924	15805954	31	*	0.000206085	0.00579186	0.000240522	0.00555134	Promoter (<=1kb)	chr1	15805646	15822013	16368	+	21749	uc007ajf.2	308	ENSMUSG00000025925	Terf1	telomeric repeat binding factor 1
28	chr1	16518988	16518988	1	*	0.000129297	0.00307862	8.32356e-05	0.00299538	Promoter (<=1kb)	chr1	16228810	16519302	290493	-	29819	uc007ajn.2	314	ENSMUSG00000025920	Stau2	staufen (RNA binding protein) homolog 2 (Drosophila)
29	chr1	16519001	16519107	107	*	2.4421e-06	0.00669945	0.326995	-0.320296	Promoter (<=1kb)	chr1	16228810	16519302	290493	-	29819	uc007ajn.2	195	ENSMUSG00000025920	Stau2	staufen (RNA binding protein) homolog 2 (Drosophila)
30	chr1	16519198	16519238	41	*	5.05756e-05	0.00533444	0.00015809	0.00517635	Promoter (<=1kb)	chr1	16228810	16519302	290493	-	29819	uc007ajn.2	64	ENSMUSG00000025920	Stau2	staufen (RNA binding protein) homolog 2 (Drosophila)
31	chr1	16688760	16688770	11	*	1.30281e-07	0.00884529	7.23907e-05	0.0087729	Promoter (<=1kb)	chr1	16688456	16709605	21150	+	17087	uc007ajz.2	314	ENSMUSG00000025779	Ly96	lymphocyte antigen 96
32	chr1	20819958	20819966	9	*	3.03826e-06	0.333408	0.00645649	0.326951	Promoter (<=1kb)	chr1	20803014	20820213	17200	-	17215	uc007alc.1	247	ENSMUSG00000041859	Mcm3	minichromosome maintenance deficient 3 (S. cerevisiae)
33	chr1	20819968	20819982	15	*	6.78768e-08	4.38874e-05	0.0080603	-0.00801642	Promoter (<=1kb)	chr1	20803014	20820213	17200	-	17215	uc007alc.1	231	ENSMUSG00000041859	Mcm3	minichromosome maintenance deficient 3 (S. cerevisiae)
34	chr1	20819983	20819983	1	*	2.60102e-05	0.314848	0.00889065	0.305957	Promoter (<=1kb)	chr1	20803014	20820213	17200	-	17215	uc007alc.1	230	ENSMUSG00000041859	Mcm3	minichromosome maintenance deficient 3 (S. cerevisiae)
35	chr1	20819996	20819996	1	*	5.55631e-07	7.46267e-05	0.0109738	-0.0108992	Promoter (<=1kb)	chr1	20803014	20820213	17200	-	17215	uc007alc.1	217	ENSMUSG00000041859	Mcm3	minichromosome maintenance deficient 3 (S. cerevisiae)
36	chr1	20819997	20819998	2	*	0.000150717	0.293857	0.0112654	0.282591	Promoter (<=1kb)	chr1	20803014	20820213	17200	-	17215	uc007alc.1	215	ENSMUSG00000041859	Mcm3	minichromosome maintenance deficient 3 (S. cerevisiae)
37	chr1	20819999	20820021	23	*	6.90466e-05	0.0002514	0.017731	-0.0174796	Promoter (<=1kb)	chr1	20803014	20820213	17200	-	17215	uc007alc.1	192	ENSMUSG00000041859	Mcm3	minichromosome maintenance deficient 3 (S. cerevisiae)
38	chr1	21079312	21079326	15	*	5.04699e-10	0.341855	0.00134639	0.340509	Promoter (<=1kb)	chr1	21001397	21079225	77829	-	170829	uc007alg.2	-87	ENSMUSG00000041779	Tram2	translocating chain-associating membrane protein 2
39	chr1	21079580	21079719	140	*	6.41313e-06	0.000618568	0.048752	-0.0478431	Promoter (<=1kb)	chr1	21001397	21079225	77829	-	170829	uc007alg.2	-355	ENSMUSG00000041779	Tram2	translocating chain-associating membrane protein 2
40	chr1	23256733	23256781	49	*	2.82299e-07	0.00357589	0.293571	-0.289995	Distal Intergenic	chr1	23272269	23272339	71	+	387225	uc011wip.1	-15536	ENSMUSG00000065405	Mir30a	microRNA 30a
41	chr1	23382683	23382878	196	*	1.77223e-08	0.00371456	0.342828	-0.339114	Promoter (<=1kb)	chr1	23366424	23383175	16752	-	70155	uc007amb.1	297	ENSMUSG00000026158	Ogfrl1	opioid growth factor receptor-like 1
42	chr1	24005481	24005607	127	*	1.40864e-07	0.00427529	0.336305	-0.331784	Promoter (<=1kb)	chr1	23995939	24005640	9702	-	68002	uc007amj.2	33	ENSMUSG00000026154	Sdhaf4	succinate dehydrogenase complex assembly factor 4
43	chr1	24678592	24678647	56	*	3.64253e-12	0.000539913	0.323441	-0.322902	Promoter (<=1kb)	chr1	24678544	24766301	87758	+	68421	uc007amt.1	103	ENSMUSG00000073725	Lmbrd1	LMBR1 domain containing 1
44	chr1	25829413	25829417	5	*	0.00306555	0.0173888	0.207529	-0.190141	Promoter (<=1kb)	chr1	25067476	25829707	762232	-	210933	uc011wis.1	290	ENSMUSG00000033569	Adgrb3	adhesion G protein-coupled receptor B3
45	chr1	33907821	33908045	225	*	3.19888e-07	2.39829e-05	0.00227059	-0.00224697	Promoter (<=1kb)	chr1	33852052	33907621	55570	-	320705	uc007aoc.1	-200	ENSMUSG00000042182	Bend6	BEN domain containing 6
46	chr1	34011485	34011519	35	*	1.32299e-06	2.43599e-05	0.00153821	-0.00151385	Promoter (<=1kb)	chr1	34011825	34308662	296838	+	13518	uc007aoi.2	-340	ENSMUSG00000026131	Dst	dystonin
47	chr1	34678078	34678214	137	*	1.43882e-07	0.000138232	0.0105163	-0.0104288	5' UTR	chr1	34633535	34636210	2676	-	241051	uc011wjd.1	-41868	#N/A	AA619741	PHD finger protein 19 pseudogene
48	chr1	36068597	36068735	139	*	6.52827e-09	0.00265117	0.343119	-0.340276	Promoter (<=1kb)	chr1	36068400	36106446	38047	+	50785	uc007apn.2	335	ENSMUSG00000045216	Hs6st1	heparan sulfate 6-O-sulfotransferase 1
49	chr1	36068763	36068763	1	*	1.20694e-08	0.00446743	2.67564e-05	0.00444068	Promoter (<=1kb)	chr1	36068400	36106446	38047	+	50785	uc007apn.2	363	ENSMUSG00000045216	Hs6st1	heparan sulfate 6-O-sulfotransferase 1
50	chr1	36068765	36068771	7	*	6.32483e-07	0.00517403	0.341112	-0.335938	Promoter (<=1kb)	chr1	36068400	36106446	38047	+	50785	uc007apn.2	371	ENSMUSG00000045216	Hs6st1	heparan sulfate 6-O-sulfotransferase 1
51	chr1	36069245	36069245	1	*	4.82098e-08	0.00354125	0.345614	-0.342073	Promoter (<=1kb)	chr1	36068400	36106446	38047	+	50785	uc007apn.2	845	ENSMUSG00000045216	Hs6st1	heparan sulfate 6-O-sulfotransferase 1
52	chr1	36244180	36244257	78	*	3.68436e-09	0.322696	0.00177959	0.320951	Promoter (<=1kb)	chr1	36140028	36244302	104275	-	320011	uc007app.2	45	ENSMUSG00000037470	Uggt1	UDP-glucose glycoprotein glucosyltransferase 1
53	chr1	36307701	36307781	81	*	4.39084e-07	0.320745	0.00498464	0.315753	Promoter (<=1kb)	chr1	36307733	36324029	16297	+	214855	uc007apu.2	0	ENSMUSG00000037447	Arid5a	AT rich interactive domain 5A (MRF1-like)
54	chr1	36308119	36308160	42	*	3.02949e-07	0.00616829	4.80532e-05	0.00612024	Promoter (<=1kb)	chr1	36307733	36324029	16297	+	214855	uc007apu.2	427	ENSMUSG00000037447	Arid5a	AT rich interactive domain 5A (MRF1-like)
55	chr1	36308570	36308661	92	*	0.000630856	0.000400763	0.012158	-0.0117572	Promoter (<=1kb)	chr1	36307733	36324029	16297	+	214855	uc007apu.2	928	ENSMUSG00000037447	Arid5a	AT rich interactive domain 5A (MRF1-like)
56	chr1	36368619	36368816	198	*	0.000817201	0.0115544	0.322764	-0.301103	Promoter (<=1kb)	chr1	36335730	36369181	33452	-	226976	uc007aqa.1	365	ENSMUSG00000010453	Kansl3	KAT8 regulatory NSL complex subunit 3
57	chr1	36557276	36557290	15	*	6.0465e-11	0.00135743	0.341144	-0.339787	Promoter (<=1kb)	chr1	36548639	36557557	8919	-	20353	uc007aqq.4	267	ENSMUSG00000026121	Sema4c	sema domain, immunoglobulin domain (Ig), transmembrane domain (TM) and short cytoplasmic domain, (semaphorin) 4C
58	chr1	36557982	36558112	131	*	6.87608e-12	0.000798025	0.342172	-0.341374	Promoter (<=1kb)	chr1	36548639	36558381	9743	-	20353	uc007aqr.4	269	ENSMUSG00000026121	Sema4c	sema domain, immunoglobulin domain (Ig), transmembrane domain (TM) and short cytoplasmic domain, (semaphorin) 4C
59	chr1	36558161	36558211	51	*	3.28832e-07	0.317695	0.00641706	0.311278	Promoter (<=1kb)	chr1	36548639	36558381	9743	-	20353	uc007aqr.4	170	ENSMUSG00000026121	Sema4c	sema domain, immunoglobulin domain (Ig), transmembrane domain (TM) and short cytoplasmic domain, (semaphorin) 4C
60	chr1	36683187	36683189	3	*	0.000778634	0.710484	0.989569	-0.279085	Promoter (<=1kb)	chr1	36562696	36683183	120488	-	381337	uc011wjn.1	-4	ENSMUSG00000046337	Fam178b	family with sequence similarity 178, member B
61	chr1	36721701	36721711	11	*	0.00112568	0.552118	0.63181	-0.0796924	Intron (uc007aqy.2/71166, intron 2 of 8)	chr1	36714538	36757960	43423	+	71166	uc007aqy.2	7173	#N/A	4933424G06Rik	RIKEN cDNA 4933424G06 gene
62	chr1	36794398	36794440	43	*	1.44542e-05	0.283135	0.57037	-0.287236	Intron (uc007arc.1/56030, intron 2 of 10)	chr1	36792189	36808476	16288	-	56030	uc007arc.1	14036	ENSMUSG00000026116	Tmem131	transmembrane protein 131
63	chr1	36939154	36939154	1	*	0.000805558	0.00552231	0.000153021	0.00536929	Promoter (<=1kb)	chr1	36792189	36939527	147339	-	56030	uc007ard.1	373	ENSMUSG00000026116	Tmem131	transmembrane protein 131
64	chr1	36939174	36939271	98	*	1.92861e-12	0.000649902	0.346766	-0.346035	Promoter (<=1kb)	chr1	36792189	36939527	147339	-	56030	uc007ard.1	256	ENSMUSG00000026116	Tmem131	transmembrane protein 131
65	chr1	37299902	37299960	59	*	1.03449e-08	2.38331e-05	0.00286997	-0.00284605	Promoter (<=1kb)	chr1	37299838	37399557	99720	+	269180	uc007ark.2	122	ENSMUSG00000026113	Inpp4a	inositol polyphosphate-4-phosphatase, type I
66	chr1	37430035	37430035	1	*	5.607e-05	0.000315153	0.013454	-0.0131389	Promoter (<=1kb)	chr1	37417085	37430103	13019	-	76178	uc007aro.2	68	ENSMUSG00000026112	Coa5	cytochrome C oxidase assembly factor 5
67	chr1	37540539	37540588	50	*	4.54135e-09	0.00208033	0.326049	-0.323983	Promoter (<=1kb)	chr1	37439340	37541016	101677	-	269181	uc007arv.3	428	ENSMUSG00000026110	Mgat4a	mannoside acetylglucosaminyltransferase 4, isoenzyme A
68	chr1	37540797	37540869	73	*	4.91459e-12	0.341534	0.000814972	0.340781	Promoter (<=1kb)	chr1	37439340	37541016	101677	-	269181	uc007arv.3	147	ENSMUSG00000026110	Mgat4a	mannoside acetylglucosaminyltransferase 4, isoenzyme A
69	chr1	38129198	38129260	63	*	3.88165e-10	2.7674e-05	0.00431477	-0.00428709	Promoter (<=1kb)	chr1	38052786	38129662	76877	-	56210	uc007asr.1	402	ENSMUSG00000026082	Rev1	REV1 homolog (S. cerevisiae)
70	chr1	38129490	38129565	76	*	3.24717e-10	0.342566	0.0014241	0.341164	Promoter (<=1kb)	chr1	38052786	38129662	76877	-	56210	uc007asr.1	97	ENSMUSG00000026082	Rev1	REV1 homolog (S. cerevisiae)
71	chr1	39367552	39367683	132	*	7.16425e-07	0.311321	0.00671811	0.307259	Promoter (<=1kb)	chr1	39367851	39371366	3516	+	114641	uc007ate.2	-299	ENSMUSG00000073702	Rpl31	ribosomal protein L31
72	chr1	39478124	39478171	48	*	0.000700542	0.00101322	0.0379186	-0.0369054	Promoter (<=1kb)	chr1	39371496	39478747	107252	-	54610	uc007atg.3	576	ENSMUSG00000003134	Tbc1d8	TBC1 domain family, member 8
73	chr1	39478552	39478790	239	*	1.22991e-08	0.339519	0.00405888	0.334835	Promoter (<=1kb)	chr1	39371496	39478747	107252	-	54610	uc007atg.3	0	ENSMUSG00000003134	Tbc1d8	TBC1 domain family, member 8
74	chr1	39834694	39834694	1	*	3.75943e-05	0.964712	0.917154	0.0475578	Distal Intergenic	chr1	39842428	39847330	4903	-	73426	uc007atp.1	12636	ENSMUSG00000101634	1700066B17Rik	RIKEN cDNA 1700066B17 gene
75	chr1	39900591	39900651	61	*	4.53202e-07	0.00327677	0.301531	-0.298254	Promoter (<=1kb)	chr1	39900913	40026310	125398	+	26921	uc007atr.1	-322	ENSMUSG00000026074	Map4k4	mitogen-activated protein kinase kinase kinase kinase 4
76	chr1	39901113	39901113	1	*	0.000271158	0.000118135	0.00400658	-0.00388844	Promoter (<=1kb)	chr1	39900913	40026310	125398	+	26921	uc007atr.1	200	ENSMUSG00000026074	Map4k4	mitogen-activated protein kinase kinase kinase kinase 4
77	chr1	42491877	42491899	23	*	0.000508949	0.0598499	0.102281	-0.0425621	Distal Intergenic	chr1	42648200	42667672	19473	-	66297	uc007aur.1	175773	ENSMUSG00000060424	Pantr1	POU domain, class 3, transcription factor 3 adjacent noncoding transcript 1
78	chr1	42696250	42696252	3	*	0.000454408	0.0523594	0.110069	-0.0577094	Promoter (<=1kb)	chr1	42697146	42700209	3064	+	18993	uc007auw.1	-896	ENSMUSG00000045515	Pou3f3	POU domain, class 3, transcription factor 3
79	chr1	42696937	42696961	25	*	0.00011664	2.52576e-05	0.000364385	-0.000339127	Promoter (<=1kb)	chr1	42697146	42700209	3064	+	18993	uc007auw.1	-209	ENSMUSG00000045515	Pou3f3	POU domain, class 3, transcription factor 3
80	chr1	42953255	42953348	94	*	8.33691e-07	2.71712e-05	0.00107428	-0.00104696	Promoter (<=1kb)	chr1	42952872	42955147	2276	+	93690	uc007avc.2	476	ENSMUSG00000041907	Gpr45	G protein-coupled receptor 45
81	chr1	50927852	50927861	10	*	2.67859e-12	0.345726	0.000628634	0.345098	Promoter (<=1kb)	chr1	50927523	51187270	259748	+	56363	uc007axj.1	338	ENSMUSG00000026109	Tmeff2	transmembrane protein with EGF-like and two follistatin-like domains 2
82	chr1	51915423	51915473	51	*	1.01461e-07	6.5339e-05	0.0075836	-0.00751826	Promoter (<=1kb)	chr1	51749758	51915978	166221	-	17912	uc007axr.3	505	ENSMUSG00000018417	Myo1b	myosin IB
83	chr1	52113902	52113952	51	*	2.07065e-07	0.00421741	0.317499	-0.313282	Distal Intergenic	chr1	52119438	52137852	18415	+	20846	uc007axy.1	-5536	ENSMUSG00000026104	Stat1	signal transducer and activator of transcription 1
84	chr1	52232769	52232787	19	*	6.63539e-06	0.329156	0.00705437	0.322101	Promoter (<=1kb)	chr1	52163450	52233232	69783	-	14660	uc007aye.2	445	ENSMUSG00000026103	Gls	glutaminase
85	chr1	52232789	52232791	3	*	1.21656e-07	3.76744e-05	0.00745582	-0.00741814	Promoter (<=1kb)	chr1	52163450	52233232	69783	-	14660	uc007aye.2	441	ENSMUSG00000026103	Gls	glutaminase
86	chr1	52232792	52232792	1	*	9.38516e-06	0.32876	0.00756612	0.321194	Promoter (<=1kb)	chr1	52163450	52233232	69783	-	14660	uc007aye.2	440	ENSMUSG00000026103	Gls	glutaminase
87	chr1	52232801	52232801	1	*	6.01987e-08	3.49207e-05	0.00800774	-0.00797282	Promoter (<=1kb)	chr1	52163450	52233232	69783	-	14660	uc007aye.2	431	ENSMUSG00000026103	Gls	glutaminase
88	chr1	52232803	52232805	3	*	1.14266e-05	0.332423	0.00817959	0.324243	Promoter (<=1kb)	chr1	52163450	52233232	69783	-	14660	uc007aye.2	427	ENSMUSG00000026103	Gls	glutaminase
89	chr1	52500033	52500044	12	*	1.39472e-05	0.00669031	0.297201	-0.290511	Promoter (<=1kb)	chr1	52455849	52500448	44600	-	17936	uc007ayh.2	404	ENSMUSG00000002881	Nab1	Ngfi-A binding protein 1
90	chr1	52500170	52500212	43	*	1.7796e-07	0.0021915	2.94523e-05	0.00216205	Promoter (<=1kb)	chr1	52455849	52500448	44600	-	17936	uc007ayh.2	236	ENSMUSG00000002881	Nab1	Ngfi-A binding protein 1
91	chr1	52500312	52500325	14	*	8.98157e-10	0.00250975	0.346021	-0.343511	Promoter (<=1kb)	chr1	52455849	52500448	44600	-	17936	uc007ayh.2	123	ENSMUSG00000002881	Nab1	Ngfi-A binding protein 1
92	chr1	52500391	52500410	20	*	1.19351e-09	0.342293	0.00191304	0.34039	Promoter (<=1kb)	chr1	52455849	52500448	44600	-	17936	uc007ayh.2	38	ENSMUSG00000002881	Nab1	Ngfi-A binding protein 1
93	chr1	52500658	52500675	18	*	1.35131e-14	0.000318711	0.34633	-0.346011	Promoter (<=1kb)	chr1	52455849	52500448	44600	-	17936	uc007ayh.2	-210	ENSMUSG00000002881	Nab1	Ngfi-A binding protein 1
94	chr1	52952810	52952853	44	*	2.15899e-09	3.74759e-05	0.00647287	-0.00643539	Promoter (<=1kb)	chr1	52925127	52952840	27714	-	67080	uc007ayr.1	0	ENSMUSG00000043629	1700019D03Rik	RIKEN cDNA 1700019D03 gene
95	chr1	53296868	53296895	28	*	0.000285892	0.0214431	0.000411426	0.0210317	Promoter (<=1kb)	chr1	53189189	53296996	107808	-	227099	uc007ayv.2	101	ENSMUSG00000026098	Pms1	postmeiotic segregation increased 1 (S. cerevisiae)
96	chr1	53313639	53313660	22	*	0.000111872	0.0072957	0.295762	-0.288467	Promoter (<=1kb)	chr1	53313624	53324064	10441	+	72085	uc007aza.2	36	ENSMUSG00000026096	Osgepl1	O-sialoglycoprotein endopeptidase-like 1
97	chr1	53352514	53352598	85	*	2.36367e-09	0.341366	0.00232546	0.339025	Promoter (<=1kb)	chr1	53325507	53352752	27246	-	70396	uc007aze.2	154	ENSMUSG00000026095	Asnsd1	asparagine synthetase domain containing 1
98	chr1	54926495	54926498	4	*	0.000140892	0.0108586	0.340559	-0.329701	Promoter (<=1kb)	chr1	54645340	54926387	281048	-	329154	uc011wkz.1	-108	ENSMUSG00000052331	Ankrd44	ankyrin repeat domain 44
99	chr1	55088459	55088508	50	*	0.00115743	0.00143625	0.0498838	-0.0483881	Promoter (<=1kb)	chr1	55088148	55091317	3170	+	15528	uc007bac.2	360	ENSMUSG00000073676	Hspe1	heat shock protein 1 (chaperonin 10)
100	chr1	55363530	55363588	59	*	0.000680819	0.0209587	0.108381	-0.0874226	Promoter (<=1kb)	chr1	55300069	55363469	63401	-	75388	uc007bal.1	-61	ENSMUSG00000025977	Boll	bol, boule-like (Drosophila)
101	chr1	57377508	57377508	1	*	0.00086306	0.233921	0.0099718	0.223949	Promoter (<=1kb)	chr1	57359222	57377544	18323	-	75323	uc007bax.1	36	ENSMUSG00000097519	4930558J18Rik	RIKEN cDNA 4930558J18 gene
102	chr1	57377598	57377659	62	*	8.19263e-08	3.4567e-05	0.00204272	-0.00200815	Promoter (<=1kb)	chr1	57377620	57385422	7803	+	73467	uc007bay.2	0	ENSMUSG00000038323	1700066M21Rik	RIKEN cDNA 1700066M21 gene
103	chr1	57969896	57969900	5	*	2.18096e-05	0.0196564	0.000185132	0.0194713	Promoter (<=1kb)	chr1	57955101	57970084	14984	-	51960	uc007bbf.2	184	ENSMUSG00000054770	Kctd18	potassium channel tetramerisation domain containing 18
104	chr1	57970189	57970245	57	*	7.91431e-08	0.00136675	2.36432e-05	0.0013431	Promoter (<=1kb)	chr1	57955101	57970084	14984	-	51960	uc007bbf.2	-105	ENSMUSG00000054770	Kctd18	potassium channel tetramerisation domain containing 18
105	chr1	58711586	58711662	77	*	1.52562e-12	2.37948e-05	0.00356408	-0.00354028	Promoter (<=1kb)	chr1	58711491	58759209	47719	+	12633	uc007bcn.3	171	ENSMUSG00000026031	Cflar	CASP8 and FADD-like apoptosis regulator
106	chr1	59119839	59120139	301	*	2.08344e-06	4.15963e-05	0.00235922	-0.00231752	Promoter (<=1kb)	chr1	59100593	59120096	19504	-	381259	uc007bde.1	0	ENSMUSG00000038079	Tmem237	transmembrane protein 237
107	chr1	59670411	59670551	141	*	1.5251e-06	0.289654	0.00526166	0.282685	Promoter (<=1kb)	chr1	59639434	59670834	31401	-	22218	uc007bdx.1	283	ENSMUSG00000026021	Sumo1	small ubiquitin-like modifier 1
108	chr1	59670556	59670565	10	*	4.25969e-09	2.37517e-05	0.00324175	-0.003218	Promoter (<=1kb)	chr1	59639434	59670834	31401	-	22218	uc007bdx.1	269	ENSMUSG00000026021	Sumo1	small ubiquitin-like modifier 1
109	chr1	59684858	59684860	3	*	0.00111743	0.0117455	0.228285	-0.216539	Promoter (<=1kb)	chr1	59685006	59711510	26505	+	55989	uc007bdy.1	-148	ENSMUSG00000026020	Nop58	NOP58 ribonucleoprotein
110	chr1	59764143	59764166	24	*	5.98219e-05	0.0127156	0.318016	-0.3053	Promoter (<=1kb)	chr1	59764279	59878081	113803	+	12168	uc007bdz.2	-136	ENSMUSG00000067336	Bmpr2	bone morphogenetic protein receptor, type II (serine/threonine kinase)
111	chr1	60567016	60567016	1	*	5.27841e-09	0.00926926	2.90661e-05	0.00924019	Promoter (<=1kb)	chr1	60483185	60566765	83581	-	77300	uc007bet.2	-251	ENSMUSG00000026014	Raph1	Ras association (RalGDS/AF-6) and pleckstrin homology domains 1
112	chr1	60567021	60567021	1	*	1.15934e-05	0.00909881	0.340181	-0.331083	Promoter (<=1kb)	chr1	60483185	60566765	83581	-	77300	uc007bet.2	-256	ENSMUSG00000026014	Raph1	Ras association (RalGDS/AF-6) and pleckstrin homology domains 1
113	chr1	60567031	60567046	16	*	2.16745e-09	0.0085476	2.59883e-05	0.00852161	Promoter (<=1kb)	chr1	60483185	60566765	83581	-	77300	uc007bet.2	-266	ENSMUSG00000026014	Raph1	Ras association (RalGDS/AF-6) and pleckstrin homology domains 1
114	chr1	60567062	60567062	1	*	2.05058e-06	0.00706039	0.345268	-0.338207	Promoter (<=1kb)	chr1	60483185	60566765	83581	-	77300	uc007bet.2	-297	ENSMUSG00000026014	Raph1	Ras association (RalGDS/AF-6) and pleckstrin homology domains 1
115	chr1	60567064	60567066	3	*	1.31877e-09	0.00689331	2.42076e-05	0.0068691	Promoter (<=1kb)	chr1	60483185	60566765	83581	-	77300	uc007bet.2	-299	ENSMUSG00000026014	Raph1	Ras association (RalGDS/AF-6) and pleckstrin homology domains 1
116	chr1	61638928	61638928	1	*	4.75545e-10	0.00460686	2.30174e-05	0.00458385	Promoter (<=1kb)	chr1	61638824	61769859	131036	+	72823	uc007bfc.2	104	ENSMUSG00000052062	Pard3b	par-3 family cell polarity regulator beta
117	chr1	62703099	62703118	20	*	4.48952e-09	0.0016905	0.319368	-0.317677	Promoter (<=1kb)	chr1	62703317	62739932	36616	+	18187	uc007bfi.1	-218	ENSMUSG00000025969	Nrp2	neuropilin 2
118	chr1	62984764	62984765	2	*	0.000434921	0.1406	0.336834	-0.196234	Distal Intergenic	chr1	63047801	63114267	66467	-	227195	uc011wmb.1	129502	ENSMUSG00000040865	Ino80d	INO80 complex subunit D
119	chr1	63113713	63113786	74	*	6.40585e-05	3.78856e-05	0.0012356	-0.00119771	Promoter (<=1kb)	chr1	63047801	63114267	66467	-	227195	uc011wmb.1	481	ENSMUSG00000040865	Ino80d	INO80 complex subunit D
120	chr1	63114066	63114066	1	*	1.61553e-06	2.3369e-05	0.00120029	-0.00117692	Promoter (<=1kb)	chr1	63047801	63114267	66467	-	227195	uc011wmb.1	201	ENSMUSG00000040865	Ino80d	INO80 complex subunit D
121	chr1	63114084	63114142	59	*	1.03837e-11	0.345497	0.000753904	0.344592	Promoter (<=1kb)	chr1	63047801	63114267	66467	-	227195	uc011wmb.1	125	ENSMUSG00000040865	Ino80d	INO80 complex subunit D
122	chr1	63446311	63446311	1	*	0.00022912	0.00419009	0.000141737	0.00404835	Promoter (<=1kb)	chr1	63445904	63532849	86946	+	23792	uc007bgd.1	407	ENSMUSG00000025964	Adam23	a disintegrin and metallopeptidase domain 23
123	chr1	63446316	63446316	1	*	4.30173e-06	0.00424526	0.267478	-0.263233	Promoter (<=1kb)	chr1	63445904	63532849	86946	+	23792	uc007bgd.1	412	ENSMUSG00000025964	Adam23	a disintegrin and metallopeptidase domain 23
124	chr1	63446318	63446323	6	*	0.000199402	0.00434551	0.000140814	0.0042047	Promoter (<=1kb)	chr1	63445904	63532849	86946	+	23792	uc007bgd.1	419	ENSMUSG00000025964	Adam23	a disintegrin and metallopeptidase domain 23
125	chr1	63446331	63446331	1	*	9.65336e-06	0.00482263	0.262333	-0.25751	Promoter (<=1kb)	chr1	63445904	63532849	86946	+	23792	uc007bgd.1	427	ENSMUSG00000025964	Adam23	a disintegrin and metallopeptidase domain 23
126	chr1	63446332	63446342	11	*	0.000200656	0.00464776	0.000147493	0.00450027	Promoter (<=1kb)	chr1	63445904	63532849	86946	+	23792	uc007bgd.1	438	ENSMUSG00000025964	Adam23	a disintegrin and metallopeptidase domain 23
127	chr1	63446343	63446343	1	*	4.76906e-06	0.00438517	0.268926	-0.26454	Promoter (<=1kb)	chr1	63445904	63532849	86946	+	23792	uc007bgd.1	439	ENSMUSG00000025964	Adam23	a disintegrin and metallopeptidase domain 23
128	chr1	63730806	63730834	29	*	5.61524e-08	0.0134319	8.07197e-05	0.0133512	Promoter (<=1kb)	chr1	63730625	63736217	5593	+	75619	uc007bgk.3	209	ENSMUSG00000025962	Fastkd2	FAST kinase domains 2
129	chr1	64121916	64122016	101	*	2.84687e-05	2.3973e-05	0.000596452	-0.000572479	Promoter (<=1kb)	chr1	64035671	64121426	85756	-	93691	uc007bgp.2	-490	ENSMUSG00000025959	Klf7	Kruppel-like factor 7 (ubiquitous)
130	chr1	64122133	64122133	1	*	1.11117e-09	0.00166203	0.34503	-0.343368	Promoter (<=1kb)	chr1	64035671	64121426	85756	-	93691	uc007bgp.2	-707	ENSMUSG00000025959	Klf7	Kruppel-like factor 7 (ubiquitous)
131	chr1	64533203	64533282	80	*	1.67555e-07	0.00224962	0.281335	-0.279085	Promoter (<=1kb)	chr1	64532804	64604548	71745	+	12912	uc007bgr.1	478	ENSMUSG00000025958	Creb1	cAMP responsive element binding protein 1
132	chr1	64533430	64533473	44	*	4.50567e-09	2.33715e-05	0.00121483	-0.00119146	Promoter (<=1kb)	chr1	64532804	64604548	71745	+	12912	uc007bgr.1	669	ENSMUSG00000025958	Creb1	cAMP responsive element binding protein 1
133	chr1	64533477	64533527	51	*	3.15698e-09	0.335123	0.00197504	0.333148	Promoter (<=1kb)	chr1	64532804	64604548	71745	+	12912	uc007bgr.1	723	ENSMUSG00000025958	Creb1	cAMP responsive element binding protein 1
134	chr1	64956641	64956869	229	*	0.000329563	0.231691	0.00165225	0.226063	Promoter (<=1kb)	chr1	64785983	64956824	170842	-	241075	uc033fji.1	0	ENSMUSG00000051344	Plekhm3	pleckstrin homology domain containing, family M, member 3
135	chr1	65186617	65186617	1	*	4.11004e-06	0.00641351	8.33032e-05	0.00633021	Promoter (<=1kb)	chr1	65186683	65205706	19024	+	18711	uc007bho.1	-66	ENSMUSG00000025949	Pikfyve	phosphoinositide kinase, FYVE finger containing
136	chr1	65186817	65186890	74	*	1.59632e-06	0.341169	0.00702808	0.334338	Promoter (<=1kb)	chr1	65186685	65226117	39433	+	18711	uc007bhq.1	205	ENSMUSG00000025949	Pikfyve	phosphoinositide kinase, FYVE finger containing
137	chr1	66817197	66817197	1	*	0.00200082	0.00312758	0.0421297	-0.0390021	Promoter (<=1kb)	chr1	66719243	66817461	98219	-	68691	uc011wml.1	264	ENSMUSG00000026004	Kansl1l	KAT8 regulatory NSL complex subunit 1-like
138	chr1	66817457	66817476	20	*	2.87953e-07	3.22038e-05	0.00489731	-0.00486511	Promoter (<=1kb)	chr1	66719243	66817461	98219	-	68691	uc011wml.1	0	ENSMUSG00000026004	Kansl1l	KAT8 regulatory NSL complex subunit 1-like
139	chr1	66817635	66817685	51	*	3.96451e-07	0.333223	0.00512664	0.328097	Promoter (<=1kb)	chr1	66719243	66817595	98353	-	68691	uc007bim.2	-40	ENSMUSG00000026004	Kansl1l	KAT8 regulatory NSL complex subunit 1-like
140	chr1	66817849	66817959	111	*	3.68516e-05	0.297615	0.00486114	0.292754	Promoter (<=1kb)	chr1	66719243	66817595	98353	-	68691	uc007bim.2	-254	ENSMUSG00000026004	Kansl1l	KAT8 regulatory NSL complex subunit 1-like
141	chr1	69107195	69107261	67	*	2.54456e-10	0.00122578	0.326509	-0.325057	Promoter (<=1kb)	chr1	68039966	69108059	1068094	-	13869	uc007bjb.1	798	ENSMUSG00000062209	Erbb4	v-erb-a erythroblastic leukemia viral oncogene homolog 4 (avian)
142	chr1	69687339	69687339	1	*	0.00171231	0.000128629	2.2914e-05	0.000105715	Promoter (<=1kb)	chr1	69681571	69687140	5570	-	22779	uc029qoy.1	-199	ENSMUSG00000025997	Ikzf2	IKAROS family zinc finger 2
143	chr1	69687573	69687693	121	*	3.83285e-11	0.343902	0.00123569	0.342666	Promoter (<=1kb)	chr1	69681571	69687140	5570	-	22779	uc029qoy.1	-433	ENSMUSG00000025997	Ikzf2	IKAROS family zinc finger 2
144	chr1	72236711	72236753	43	*	9.59101e-05	0.00037565	2.35192e-05	0.00035214	Distal Intergenic	chr1	72159233	72212307	53075	-	381269	uc007bkg.2	-24404	ENSMUSG00000039395	Mreg	melanoregulin
145	chr1	72254773	72254807	35	*	8.83958e-12	0.343459	0.000777528	0.342682	Intron (uc007bkh.1/uc007bkh.1, intron 1 of 3)	chr1	72259173	72284314	25142	-	111175	uc007bki.2	29507	ENSMUSG00000026189	Pecr	peroxisomal trans-2-enoyl-CoA reductase
146	chr1	74124499	74124609	111	*	1.09685e-07	0.0064928	0.337616	-0.3312	Promoter (<=1kb)	chr1	73910231	74124449	214219	-	21961	uc007blg.3	-50	ENSMUSG00000055322	Tns1	tensin 1
147	chr1	74124875	74124922	48	*	4.89961e-06	0.00931114	0.309206	-0.299894	Promoter (<=1kb)	chr1	73910231	74124449	214219	-	21961	uc007blg.3	-426	ENSMUSG00000055322	Tns1	tensin 1
148	chr1	74206908	74206908	1	*	0.000731966	0.7785	0.887848	-0.109348	Promoter (<=1kb)	chr1	74206554	74206620	67	-	100316687	uc056yde.1	-288	ENSMUSG00000087820	Mir1928	microRNA 1928
149	chr1	74236614	74236691	78	*	6.50885e-09	0.00390658	5.59068e-05	0.00385011	Promoter (<=1kb)	chr1	74236550	74268213	31664	+	76709	uc007blo.1	141	ENSMUSG00000006304	Arpc2	actin related protein 2/3 complex, subunit 2
150	chr1	74236769	74236883	115	*	3.75315e-12	0.000783319	0.345233	-0.34445	Promoter (<=1kb)	chr1	74236891	74268213	31323	+	76709	uc007blp.1	-122	ENSMUSG00000006304	Arpc2	actin related protein 2/3 complex, subunit 2
151	chr1	74284683	74284714	32	*	5.77282e-07	3.79523e-05	0.0023283	-0.00229035	Promoter (<=1kb)	chr1	74279840	74284738	4899	-	227290	uc007blr.2	24	ENSMUSG00000006299	Aamp	angio-associated migratory protein
152	chr1	74391781	74391783	3	*	7.32718e-08	0.00430617	3.51771e-05	0.00427099	Promoter (<=1kb)	chr1	74391609	74397285	5677	+	227292	uc007blz.2	174	ENSMUSG00000026176	Ctdsp1	CTD (carboxy-terminal domain, RNA polymerase II, polypeptide A) small phosphatase 1
153	chr1	74391992	74392114	123	*	5.84208e-14	0.00012449	0.3449	-0.344592	Promoter (<=1kb)	chr1	74391609	74397285	5677	+	227292	uc007blz.2	505	ENSMUSG00000026176	Ctdsp1	CTD (carboxy-terminal domain, RNA polymerase II, polypeptide A) small phosphatase 1
154	chr1	74505901	74505996	96	*	1.14106e-06	0.31776	0.0052375	0.312522	Promoter (<=1kb)	chr1	74452687	74505803	53117	-	319651	uc007bme.1	-98	ENSMUSG00000033364	Usp37	ubiquitin specific peptidase 37
155	chr1	74506478	74506594	117	*	1.20089e-11	0.00081253	0.33495	-0.332966	Promoter (<=1kb)	chr1	74506060	74530842	24783	+	58184	uc007bmf.2	534	ENSMUSG00000026174	Rqcd1	rcd1 (required for cell differentiation) homolog 1 (S. pombe)
156	chr1	74587785	74587858	74	*	2.37981e-11	0.345453	0.000958403	0.344495	Promoter (<=1kb)	chr1	74565128	74588028	22901	-	77264	uc007bmm.1	170	ENSMUSG00000026135	Zfp142	zinc finger protein 142
157	chr1	74588022	74588022	1	*	0.000639137	0.230841	0.0114652	0.219376	Promoter (<=1kb)	chr1	74565128	74588028	22901	-	77264	uc007bmm.1	6	ENSMUSG00000026135	Zfp142	zinc finger protein 142
158	chr1	74661856	74661923	68	*	8.95324e-07	0.00435308	4.80536e-05	0.00430493	Promoter (<=1kb)	chr1	74661754	74697973	36220	+	67534	uc007bmy.1	169	ENSMUSG00000033257	Ttll4	tubulin tyrosine ligase-like family, member 4
159	chr1	74855133	74855223	91	*	7.53798e-06	0.000774883	2.6549e-05	0.000750238	Promoter (<=1kb)	chr1	74855029	74857732	2704	+	12570	uc007bng.2	194	ENSMUSG00000090071	Cdk5r2	cyclin-dependent kinase 5, regulatory subunit 2 (p39)
160	chr1	74885199	74885212	14	*	0.00101563	0.0718506	0.00671083	0.0651398	Promoter (<=1kb)	chr1	74881509	74885408	3900	-	260298	uc007bnh.2	196	ENSMUSG00000055197	Fev	FEV (ETS oncogene family)
161	chr1	74885331	74885361	31	*	2.57417e-09	2.85582e-05	0.00387572	-0.00384717	Promoter (<=1kb)	chr1	74881509	74885408	3900	-	260298	uc007bnh.2	47	ENSMUSG00000055197	Fev	FEV (ETS oncogene family)
162	chr1	74885379	74885424	46	*	4.79586e-05	0.3119	0.0117721	0.300128	Promoter (<=1kb)	chr1	74881509	74885408	3900	-	260298	uc007bnh.2	0	ENSMUSG00000055197	Fev	FEV (ETS oncogene family)
163	chr1	74948402	74948408	7	*	0.00276364	0.0183455	0.137595	-0.119249	Exon (uc007bnl.1/16147, exon 2 of 3)	chr1	74945318	74951651	6334	-	16147	uc007bnl.1	3243	ENSMUSG00000006538	Ihh	Indian hedgehog
164	chr1	75192420	75192488	69	*	0.000420401	0.00728202	0.20968	-0.202398	Promoter (<=1kb)	chr1	75192323	75199385	7063	+	52231	uc007boe.1	165	ENSMUSG00000026199	Ankzf1	ankyrin repeat and zinc finger domain containing 1
165	chr1	75316711	75316754	44	*	5.48798e-06	0.267012	0.00484027	0.26226	Promoter (<=1kb)	chr1	75308565	75317007	8443	-	13437	uc007bou.2	253	ENSMUSG00000026209	Dnpep	aspartyl aminopeptidase
166	chr1	75317313	75317319	7	*	9.35911e-06	6.48285e-05	0.00376093	-0.0036961	Promoter (<=1kb)	chr1	75307940	75317017	9078	-	13437	uc007bow.2	-296	ENSMUSG00000026209	Dnpep	aspartyl aminopeptidase
167	chr1	75317407	75317457	51	*	6.82554e-05	0.299745	0.0105644	0.290317	Promoter (<=1kb)	chr1	75308565	75317637	9073	-	13437	uc011wnp.1	180	ENSMUSG00000026209	Dnpep	aspartyl aminopeptidase
168	chr1	75382317	75382320	4	*	8.68027e-07	2.31975e-05	0.00137412	-0.00135092	Promoter (<=1kb)	chr1	75382114	75404565	22452	+	11790	uc007bpa.1	206	ENSMUSG00000026207	Speg	SPEG complex locus
169	chr1	75382440	75382502	63	*	1.86758e-06	0.00590513	0.330551	-0.324418	Promoter (<=1kb)	chr1	75382114	75404565	22452	+	11790	uc007bpa.1	388	ENSMUSG00000026207	Speg	SPEG complex locus
170	chr1	75478671	75478675	5	*	0.000365084	0.251314	0.0106146	0.240699	Promoter (<=1kb)	chr1	75474569	75478746	4178	-	74241	uc007bph.1	71	ENSMUSG00000032997	Chpf	chondroitin polymerizing factor
171	chr1	75478700	75478700	1	*	2.8199e-05	0.000135627	0.00671446	-0.00657883	Promoter (<=1kb)	chr1	75474569	75478746	4178	-	74241	uc007bph.1	46	ENSMUSG00000032997	Chpf	chondroitin polymerizing factor
172	chr1	75478710	75478746	37	*	7.62821e-07	0.295839	0.00391745	0.291921	Promoter (<=1kb)	chr1	75474569	75478746	4178	-	74241	uc007bph.1	0	ENSMUSG00000032997	Chpf	chondroitin polymerizing factor
173	chr1	75478946	75479102	157	*	2.65229e-09	0.328169	0.00182614	0.326258	Promoter (<=1kb)	chr1	75474569	75478746	4178	-	74241	uc007bph.1	-200	ENSMUSG00000032997	Chpf	chondroitin polymerizing factor
174	chr1	75479311	75479344	34	*	0.000110866	0.136688	0.00297595	0.134001	Promoter (<=1kb)	chr1	75474569	75479471	4903	-	74241	uc007bpi.2	127	ENSMUSG00000032997	Chpf	chondroitin polymerizing factor
175	chr1	75479419	75479485	67	*	2.5195e-06	2.78097e-05	0.001827	-0.00179919	Promoter (<=1kb)	chr1	75474569	75479471	4903	-	74241	uc007bpi.2	0	ENSMUSG00000032997	Chpf	chondroitin polymerizing factor
176	chr1	75479700	75479701	2	*	5.53778e-13	0.000570848	0.36097	-0.3604	Promoter (<=1kb)	chr1	75479580	75485693	6114	+	319998	uc007bpm.2	121	ENSMUSG00000051703	Tmem198	transmembrane protein 198
177	chr1	75486784	75486808	25	*	0.000421396	0.294923	0.19117	0.104774	Exon (uc007bpn.2/98733, exon 19 of 20)	chr1	75479580	75485693	6114	+	319998	uc007bpm.2	7228	ENSMUSG00000051703	Tmem198	transmembrane protein 198
178	chr1	75505566	75505632	67	*	4.82453e-08	0.00347989	0.333827	-0.329674	Promoter (<=1kb)	chr1	75485825	75506452	20628	-	98733	uc007bpn.2	820	ENSMUSG00000026211	Obsl1	obscurin-like 1
179	chr1	75505842	75505856	15	*	2.35745e-10	0.00135833	0.341416	-0.340058	Promoter (<=1kb)	chr1	75485825	75506452	20628	-	98733	uc007bpn.2	596	ENSMUSG00000026211	Obsl1	obscurin-like 1
180	chr1	75546417	75546462	46	*	3.13882e-10	0.300293	0.000921599	0.299371	Promoter (<=1kb)	chr1	75546266	75559431	13166	+	20536	uc007bpv.2	196	ENSMUSG00000006576	Slc4a3	solute carrier family 4 (anion exchanger), member 3
181	chr1	75546572	75546603	32	*	0.00090188	0.000127339	0.00241542	-0.00228809	Promoter (<=1kb)	chr1	75546644	75559431	12788	+	20536	uc007bpw.2	-72	ENSMUSG00000006576	Slc4a3	solute carrier family 4 (anion exchanger), member 3
182	chr1	75546891	75546891	1	*	4.43032e-07	0.00317314	0.282808	-0.279634	Promoter (<=1kb)	chr1	75546644	75559431	12788	+	20536	uc007bpw.2	247	ENSMUSG00000006576	Slc4a3	solute carrier family 4 (anion exchanger), member 3
183	chr1	75546894	75546897	4	*	6.95626e-05	0.00331257	0.000100648	0.00321192	Promoter (<=1kb)	chr1	75546644	75559431	12788	+	20536	uc007bpw.2	253	ENSMUSG00000006576	Slc4a3	solute carrier family 4 (anion exchanger), member 3
184	chr1	75546898	75546898	1	*	6.80877e-07	0.00341467	0.28156	-0.278146	Promoter (<=1kb)	chr1	75546644	75559431	12788	+	20536	uc007bpw.2	254	ENSMUSG00000006576	Slc4a3	solute carrier family 4 (anion exchanger), member 3
185	chr1	75546903	75546932	30	*	4.88644e-05	0.00329077	9.32328e-05	0.00319754	Promoter (<=1kb)	chr1	75546644	75559431	12788	+	20536	uc007bpw.2	288	ENSMUSG00000006576	Slc4a3	solute carrier family 4 (anion exchanger), member 3
186	chr1	80340379	80340443	65	*	1.03536e-09	0.339556	0.00168142	0.337874	Promoter (<=1kb)	chr1	80266818	80340430	73613	-	26554	uc007brc.1	0	ENSMUSG00000004364	Cul3	cullin 3
187	chr1	80340464	80340577	114	*	5.94665e-08	2.59984e-05	0.00234086	-0.00231511	Promoter (<=1kb)	chr1	80266818	80340430	73613	-	26554	uc007brc.1	-34	ENSMUSG00000004364	Cul3	cullin 3
188	chr1	80340698	80340737	40	*	0.00155801	0.203295	0.00223279	0.201063	Promoter (<=1kb)	chr1	80266818	80340430	73613	-	26554	uc007brc.1	-268	ENSMUSG00000004364	Cul3	cullin 3
189	chr1	80758340	80758382	43	*	1.56479e-06	2.79905e-05	0.00128509	-0.0012571	Promoter (<=1kb)	chr1	80501068	80758553	257486	-	210293	uc007brg.3	171	ENSMUSG00000038608	Dock10	dedicator of cytokinesis 10
190	chr1	82283322	82283335	14	*	5.12656e-06	0.0067845	0.297542	-0.290758	Intron (uc007brp.2/16367, intron 1 of 1)	chr1	82233105	82291439	58335	-	16367	uc007brp.2	8104	ENSMUSG00000055980	Irs1	insulin receptor substrate 1
191	chr1	82283445	82283455	11	*	1.55874e-14	0.346114	0.000314833	0.345799	Intron (uc007brp.2/16367, intron 1 of 1)	chr1	82233105	82291439	58335	-	16367	uc007brp.2	7984	ENSMUSG00000055980	Irs1	insulin receptor substrate 1
192	chr1	82291552	82291557	6	*	4.12753e-06	6.1274e-05	0.00575527	-0.00569399	Promoter (<=1kb)	chr1	82233105	82291439	58335	-	16367	uc007brp.2	-113	ENSMUSG00000055980	Irs1	insulin receptor substrate 1
193	chr1	82291722	82291850	129	*	2.60949e-08	3.42487e-05	0.00425335	-0.0042191	Promoter (<=1kb)	chr1	82233105	82291439	58335	-	16367	uc007brp.2	-283	ENSMUSG00000055980	Irs1	insulin receptor substrate 1
194	chr1	82291851	82291878	28	*	5.02628e-07	0.337053	0.00419905	0.332854	Promoter (<=1kb)	chr1	82233105	82291439	58335	-	16367	uc007brp.2	-412	ENSMUSG00000055980	Irs1	insulin receptor substrate 1
195	chr1	82974634	82974634	1	*	0.000918569	0.746335	0.87173	-0.125395	Distal Intergenic	chr1	83012523	83038448	25926	-	80721	uc007bsi.2	63814	ENSMUSG00000038496	Slc19a3	solute carrier family 19, member 3
196	chr1	83038351	83038351	1	*	0.00137181	0.000689701	0.0155872	-0.0148975	Promoter (<=1kb)	chr1	83012523	83038448	25926	-	80721	uc007bsi.2	97	ENSMUSG00000038496	Slc19a3	solute carrier family 19, member 3
197	chr1	84838580	84838611	32	*	2.20725e-08	0.344268	0.00364484	0.340624	Promoter (<=1kb)	chr1	84721189	84839304	118116	-	14897	uc007bsy.1	693	ENSMUSG00000026219	Trip12	thyroid hormone receptor interactor 12
198	chr1	84838779	84838779	1	*	3.30376e-07	0.323667	0.00318449	0.320482	Promoter (<=1kb)	chr1	84721189	84839304	118116	-	14897	uc007bsy.1	525	ENSMUSG00000026219	Trip12	thyroid hormone receptor interactor 12
199	chr1	84838826	84838939	114	*	0.00248583	0.0013973	0.197991	-0.196236	Promoter (<=1kb)	chr1	84721189	84839304	118116	-	14897	uc007bsy.1	365	ENSMUSG00000026219	Trip12	thyroid hormone receptor interactor 12
200	chr1	84839057	84839069	13	*	9.49351e-09	0.00257546	0.338908	-0.336333	Promoter (<=1kb)	chr1	84721189	84839304	118116	-	14897	uc007bsy.1	235	ENSMUSG00000026219	Trip12	thyroid hormone receptor interactor 12
201	chr1	84839251	84839272	22	*	2.19314e-06	3.9227e-05	0.00376762	-0.00372839	Promoter (<=1kb)	chr1	84721189	84839304	118116	-	14897	uc007bsy.1	32	ENSMUSG00000026219	Trip12	thyroid hormone receptor interactor 12
202	chr1	84839402	84839491	90	*	7.52006e-05	0.00488369	0.225809	-0.220629	Promoter (<=1kb)	chr1	84721189	84839304	118116	-	14897	uc007bsy.1	-98	ENSMUSG00000026219	Trip12	thyroid hormone receptor interactor 12
203	chr1	86358630	86358630	1	*	0.00418132	0.000665577	0.0198222	-0.0191567	Promoter (<=1kb)	chr1	86344719	86359455	14737	-	17975	uc007bvl.1	825	ENSMUSG00000026234	Ncl	nucleolin
204	chr1	86358847	86358896	50	*	1.3952e-11	9.57896e-05	0.337615	-0.336828	Promoter (<=1kb)	chr1	86344719	86359455	14737	-	17975	uc007bvl.1	559	ENSMUSG00000026234	Ncl	nucleolin
205	chr1	86434196	86434219	24	*	0.00106788	0.0155291	0.268063	-0.252534	Distal Intergenic	chr1	86426329	86428049	1721	+	71863	uc007bvo.2	7890	ENSMUSG00000036574	1700019O17Rik	RIKEN cDNA 1700019O17 gene
206	chr1	86472356	86472385	30	*	2.61623e-08	0.328679	0.00282277	0.325856	Distal Intergenic	chr1	86426329	86428049	1721	+	71863	uc007bvo.2	46056	ENSMUSG00000036574	1700019O17Rik	RIKEN cDNA 1700019O17 gene
207	chr1	86525313	86525350	38	*	0.000271522	0.0157194	0.000524879	0.0151928	Promoter (1-2kb)	chr1	86526736	86530698	3963	+	19231	uc007bvp.1	-1423	ENSMUSG00000026238	Ptma	prothymosin alpha
208	chr1	86581993	86582031	39	*	0.00114575	0.0137246	0.000312222	0.0134123	Promoter (<=1kb)	chr1	86543015	86582501	39487	-	18582	uc007bvq.1	470	ENSMUSG00000026239	Pde6d	phosphodiesterase 6D, cGMP-specific, rod, delta
209	chr1	86582146	86582162	17	*	9.79513e-07	5.54723e-05	0.00547884	-0.00542337	Promoter (<=1kb)	chr1	86543015	86582501	39487	-	18582	uc007bvq.1	339	ENSMUSG00000026239	Pde6d	phosphodiesterase 6D, cGMP-specific, rod, delta
210	chr1	86582391	86582401	11	*	0.00105791	0.301206	0.022108	0.279098	Promoter (<=1kb)	chr1	86543015	86582501	39487	-	18582	uc007bvq.1	100	ENSMUSG00000026239	Pde6d	phosphodiesterase 6D, cGMP-specific, rod, delta
211	chr1	86582768	86582769	2	*	2.36389e-08	2.82547e-05	0.00395259	-0.00392434	Promoter (<=1kb)	chr1	86543015	86582501	39487	-	18582	uc007bvq.1	-267	ENSMUSG00000026239	Pde6d	phosphodiesterase 6D, cGMP-specific, rod, delta
212	chr1	88008401	88008463	63	*	6.71725e-10	0.0017205	0.337061	-0.335341	Promoter (<=1kb)	chr1	87945121	88008551	63431	-	227334	uc007bxw.1	88	ENSMUSG00000005501	Usp40	ubiquitin specific peptidase 40
213	chr1	89454675	89454822	148	*	2.31836e-08	0.00205459	2.39049e-05	0.00203097	Promoter (<=1kb)	chr1	89454811	89895282	440472	+	347722	uc007byw.1	0	ENSMUSG00000055013	Agap1	ArfGAP with GTPase domain, ankyrin repeat and PH domain 1
214	chr1	91053059	91053143	85	*	1.04919e-08	0.341271	0.00261399	0.338657	Promoter (<=1kb)	chr1	91053444	91117322	63879	+	16978	uc007bzr.2	-385	ENSMUSG00000026305	Lrrfip1	leucine rich repeat (in FLII) interacting protein 1
215	chr1	91298401	91298418	18	*	1.21245e-12	0.338395	0.000572803	0.337822	Promoter (<=1kb)	chr1	91298338	91305454	7117	+	50880	uc007cad.1	80	ENSMUSG00000026307	Scly	selenocysteine lyase
216	chr1	91398898	91398983	86	*	1.71061e-06	3.21362e-05	0.00295884	-0.00292565	Promoter (<=1kb)	chr1	91373861	91398783	24923	-	67444	uc007cak.1	-115	ENSMUSG00000026309	Ilkap	integrin-linked kinase-associated serine/threonine phosphatase 2C
217	chr1	91399017	91399018	2	*	1.66333e-07	0.329768	0.00380973	0.325958	Promoter (<=1kb)	chr1	91373861	91398783	24923	-	67444	uc007cak.1	-234	ENSMUSG00000026309	Ilkap	integrin-linked kinase-associated serine/threonine phosphatase 2C
218	chr1	91399042	91399046	5	*	4.70057e-07	4.76664e-05	0.00476831	-0.00472065	Promoter (<=1kb)	chr1	91373861	91398783	24923	-	67444	uc007cak.1	-259	ENSMUSG00000026309	Ilkap	integrin-linked kinase-associated serine/threonine phosphatase 2C
219	chr1	91414327	91414361	35	*	1.59042e-08	0.00318937	0.343152	-0.339857	Promoter (1-2kb)	chr1	91411483	91413222	1740	-	55927	uc007cau.1	-1105	ENSMUSG00000067071	Hes6	hairy and enhancer of split 6
220	chr1	91459092	91459133	42	*	7.46102e-08	6.17976e-05	0.00261509	-0.00255329	Promoter (<=1kb)	chr1	91415982	91459328	43347	-	18627	uc007cav.1	195	ENSMUSG00000055866	Per2	period circadian clock 2
221	chr1	91540718	91540738	21	*	1.79424e-05	7.11526e-05	0.00534723	-0.00527607	Promoter (<=1kb)	chr1	91540565	91559590	19026	+	65247	uc007caz.1	173	ENSMUSG00000026311	Asb1	ankyrin repeat and SOCS box-containing 1
222	chr1	91540762	91540853	92	*	2.07093e-06	0.164985	0.00202842	0.162957	Promoter (<=1kb)	chr1	91540565	91559590	19026	+	65247	uc007caz.1	288	ENSMUSG00000026311	Asb1	ankyrin repeat and SOCS box-containing 1
223	chr1	91540931	91540935	5	*	0.00100087	0.000332847	0.00809115	-0.0077583	Promoter (<=1kb)	chr1	91541080	91552779	11700	+	65247	uc007cbb.3	-149	ENSMUSG00000026311	Asb1	ankyrin repeat and SOCS box-containing 1
224	chr1	92179785	92179802	18	*	8.63855e-13	0.000521586	0.345638	-0.345116	Promoter (<=1kb)	chr1	91932749	92180341	247593	-	208727	uc007cbg.2	539	ENSMUSG00000026313	Hdac4	histone deacetylase 4
225	chr1	92180074	92180129	56	*	9.77605e-06	2.3304e-05	0.00175786	-0.00173458	Promoter (<=1kb)	chr1	91932749	92180341	247593	-	208727	uc007cbg.2	212	ENSMUSG00000026313	Hdac4	histone deacetylase 4
226	chr1	92831602	92831680	79	*	1.52908e-08	0.339777	0.00256045	0.337217	Promoter (<=1kb)	chr1	92831686	92860196	28511	+	14733	uc007cbs.1	-84	ENSMUSG00000034220	Gpc1	glypican 1
227	chr1	92831807	92831858	52	*	1.03498e-09	0.341486	0.00159188	0.339894	Promoter (<=1kb)	chr1	92831686	92860196	28511	+	14733	uc007cbs.1	172	ENSMUSG00000034220	Gpc1	glypican 1
228	chr1	92832019	92832020	2	*	0.00179632	0.00523975	0.0810936	-0.0758539	Promoter (<=1kb)	chr1	92831686	92860196	28511	+	14733	uc007cbs.1	334	ENSMUSG00000034220	Gpc1	glypican 1
229	chr1	92832198	92832201	4	*	0.000574892	8.10789e-05	0.00191276	-0.00183168	Promoter (<=1kb)	chr1	92831686	92860196	28511	+	14733	uc007cbs.1	515	ENSMUSG00000034220	Gpc1	glypican 1
230	chr1	92910787	92910801	15	*	1.52311e-08	0.00295702	0.345076	-0.342119	Promoter (<=1kb)	chr1	92910825	92920585	9761	+	108657	uc007cbw.2	-38	ENSMUSG00000026269	Rnpepl1	arginyl aminopeptidase (aminopeptidase B)-like 1
231	chr1	92910839	92910941	103	*	1.90952e-09	0.328657	0.00143713	0.327318	Promoter (<=1kb)	chr1	92910825	92920585	9761	+	108657	uc007cbw.2	116	ENSMUSG00000026269	Rnpepl1	arginyl aminopeptidase (aminopeptidase B)-like 1
232	chr1	92934744	92934744	1	*	9.99505e-08	0.34489	0.00480686	0.340083	Promoter (<=1kb)	chr1	92934408	92940972	6565	+	23830	uc007cbx.1	336	ENSMUSG00000026270	Capn10	calpain 10
233	chr1	92934793	92934834	42	*	3.18156e-07	6.14635e-05	0.00977167	-0.0097079	Promoter (<=1kb)	chr1	92934408	92940972	6565	+	23830	uc007cbx.1	426	ENSMUSG00000026270	Capn10	calpain 10
234	chr1	93101889	93101951	63	*	6.28261e-07	3.04423e-05	0.00171581	-0.00168536	Promoter (<=1kb)	chr1	93015455	93101874	86420	-	16560	uc007cdf.3	-15	ENSMUSG00000014602	Kif1a	kinesin family member 1A
235	chr1	93305567	93305567	1	*	0.00112603	0.03317	0.323149	-0.289979	Promoter (<=1kb)	chr1	93299211	93305870	6660	-	69821	uc007cdo.1	303	ENSMUSG00000026273	Mterf4	mitochondrial transcription termination factor 4
236	chr1	93305743	93305768	26	*	4.47635e-05	0.107055	0.0017069	0.105348	Promoter (<=1kb)	chr1	93299211	93305870	6660	-	69821	uc007cdo.1	102	ENSMUSG00000026273	Mterf4	mitochondrial transcription termination factor 4
237	chr1	93305937	93305955	19	*	0.000247572	0.00110626	0.0554322	-0.0543259	Promoter (<=1kb)	chr1	93299211	93305870	6660	-	69821	uc007cdo.1	-67	ENSMUSG00000026273	Mterf4	mitochondrial transcription termination factor 4
238	chr1	93445174	93445187	14	*	1.3326e-08	0.00289618	0.345503	-0.342607	Promoter (<=1kb)	chr1	93405940	93445701	39762	-	110611	uc007cdx.2	514	ENSMUSG00000034088	Hdlbp	high density lipoprotein (HDL) binding protein
239	chr1	93445299	93445299	1	*	5.99214e-06	0.00646483	0.326873	-0.320408	Promoter (<=1kb)	chr1	93405940	93445701	39762	-	110611	uc007cdx.2	402	ENSMUSG00000034088	Hdlbp	high density lipoprotein (HDL) binding protein
240	chr1	93445300	93445316	17	*	7.96634e-05	0.00669296	0.000104834	0.00658813	Promoter (<=1kb)	chr1	93405940	93445701	39762	-	110611	uc007cdx.2	385	ENSMUSG00000034088	Hdlbp	high density lipoprotein (HDL) binding protein
241	chr1	93445318	93445321	4	*	6.96456e-05	0.00672191	0.254568	-0.247846	Promoter (<=1kb)	chr1	93405940	93445701	39762	-	110611	uc007cdx.2	380	ENSMUSG00000034088	Hdlbp	high density lipoprotein (HDL) binding protein
242	chr1	93445326	93445326	1	*	0.000616991	0.00642933	0.000223907	0.00620542	Promoter (<=1kb)	chr1	93405940	93445701	39762	-	110611	uc007cdx.2	375	ENSMUSG00000034088	Hdlbp	high density lipoprotein (HDL) binding protein
243	chr1	93445330	93445330	1	*	0.000160428	0.00674551	0.22453	-0.217784	Promoter (<=1kb)	chr1	93405940	93445701	39762	-	110611	uc007cdx.2	371	ENSMUSG00000034088	Hdlbp	high density lipoprotein (HDL) binding protein
244	chr1	93445384	93445410	27	*	0.00109886	0.00381412	0.000189159	0.00362496	Promoter (<=1kb)	chr1	93405940	93445701	39762	-	110611	uc007cdx.2	291	ENSMUSG00000034088	Hdlbp	high density lipoprotein (HDL) binding protein
245	chr1	93478227	93478317	91	*	0.000139503	2.30505e-05	0.00030078	-0.000277729	Promoter (<=1kb)	chr1	93405940	93478917	72978	-	110611	uc007cdy.2	600	ENSMUSG00000034088	Hdlbp	high density lipoprotein (HDL) binding protein
246	chr1	93478526	93478535	10	*	0.000159822	0.00573338	0.275035	-0.269301	Promoter (<=1kb)	chr1	93405940	93478917	72978	-	110611	uc007cdy.2	382	ENSMUSG00000034088	Hdlbp	high density lipoprotein (HDL) binding protein
247	chr1	93478614	93478620	7	*	1.5401e-05	0.00176228	4.50096e-05	0.00171727	Promoter (<=1kb)	chr1	93405940	93478917	72978	-	110611	uc007cdy.2	297	ENSMUSG00000034088	Hdlbp	high density lipoprotein (HDL) binding protein
248	chr1	93479672	93479672	1	*	0.000304481	0.0920523	0.00221815	0.0898341	Promoter (<=1kb)	chr1	93479061	93509732	30672	+	18000	uc011wpq.1	611	ENSMUSG00000026276	Sept2	septin 2
249	chr1	93512016	93512020	5	*	0.000232068	4.86984e-05	0.00114345	-0.00109476	Promoter (<=1kb)	chr1	93512104	93581294	69191	+	227377	uc007ceb.2	-88	ENSMUSG00000034066	Farp2	FERM, RhoGEF and pleckstrin domain protein 2
250	chr1	93512030	93512059	30	*	6.18535e-12	0.337411	0.000712196	0.33674	Promoter (<=1kb)	chr1	93512104	93581294	69191	+	227377	uc007ceb.2	-74	ENSMUSG00000034066	Farp2	FERM, RhoGEF and pleckstrin domain protein 2
251	chr1	93512141	93512268	128	*	5.34007e-08	0.00752145	0.345082	-0.337481	Promoter (<=1kb)	chr1	93512104	93581294	69191	+	227377	uc007ceb.2	164	ENSMUSG00000034066	Farp2	FERM, RhoGEF and pleckstrin domain protein 2
252	chr1	93686205	93686301	97	*	2.51205e-10	0.00138125	0.337962	-0.336531	Promoter (<=1kb)	chr1	93685694	93695762	10069	+	51800	uc007cee.1	607	ENSMUSG00000026278	Bok	BCL2-related ovarian killer
253	chr1	93686633	93686633	1	*	3.03887e-07	0.00427213	0.317538	-0.313266	Promoter (<=1kb)	chr1	93685694	93695762	10069	+	51800	uc007cee.1	939	ENSMUSG00000026278	Bok	BCL2-related ovarian killer
254	chr1	93801801	93801889	89	*	7.5305e-09	4.13257e-05	0.00590824	-0.00586691	Promoter (<=1kb)	chr1	93792576	93801934	9359	-	21915	uc007cek.2	45	ENSMUSG00000026281	Dtymk	deoxythymidylate kinase
255	chr1	93804055	93804172	118	*	1.92478e-06	2.32482e-05	0.000544858	-0.000521626	Promoter (<=1kb)	chr1	93803965	93822100	18136	+	66262	uc007cen.1	207	ENSMUSG00000026283	Ing5	inhibitor of growth family, member 5
256	chr1	93826616	93826658	43	*	0.000547806	0.869403	0.770835	0.0993753	Promoter (1-2kb)	chr1	93825274	93852174	26901	+	98314	uc007ceo.2	1384	ENSMUSG00000073609	D2hgdh	D-2-hydroxyglutarate dehydrogenase
257	chr1	95313961	95313961	1	*	1.23259e-07	0.0218134	0.000120743	0.0216926	Promoter (<=1kb)	chr1	95313628	95327945	14318	+	67698	uc007cex.2	333	ENSMUSG00000051185	Fam174a	family with sequence similarity 174, member A
258	chr1	105664306	105664308	3	*	3.8611e-06	2.32864e-05	0.000846104	-0.000822818	Promoter (<=1kb)	chr1	105663861	105665150	1290	+	227446	uc007cgi.2	447	ENSMUSG00000026319	2310035C23Rik	RIKEN cDNA 2310035C23 gene
259	chr1	105664352	105664401	50	*	5.20599e-07	0.00242233	2.64683e-05	0.00239573	Promoter (<=1kb)	chr1	105663861	105665150	1290	+	227446	uc007cgi.2	540	ENSMUSG00000026319	2310035C23Rik	RIKEN cDNA 2310035C23 gene
260	chr1	105990942	105991026	85	*	2.18831e-11	0.000909861	0.34559	-0.344666	Promoter (<=1kb)	chr1	105990406	106034079	43674	+	227449	uc007cgq.3	620	ENSMUSG00000038866	Zcchc2	zinc finger, CCHC domain containing 2
261	chr1	105993908	105993990	83	*	1.02388e-05	0.00561911	7.21055e-05	0.005547	Intron (uc007cgq.3/227449, intron 1 of 12)	chr1	105990406	106034079	43674	+	227449	uc007cgq.3	3584	ENSMUSG00000038866	Zcchc2	zinc finger, CCHC domain containing 2
262	chr1	105993991	105993996	6	*	4.76747e-09	0.00177913	0.334383	-0.332604	Intron (uc007cgq.3/227449, intron 1 of 12)	chr1	105990406	106034079	43674	+	227449	uc007cgq.3	3590	ENSMUSG00000038866	Zcchc2	zinc finger, CCHC domain containing 2
263	chr1	105993997	105994034	38	*	2.64786e-05	0.000909483	2.70943e-05	0.000882389	Intron (uc007cgq.3/227449, intron 1 of 12)	chr1	105990406	106034079	43674	+	227449	uc007cgq.3	3628	ENSMUSG00000038866	Zcchc2	zinc finger, CCHC domain containing 2
264	chr1	106172041	106172180	140	*	2.03789e-10	0.00307832	2.61256e-05	0.00305219	Promoter (<=1kb)	chr1	106171869	106287406	115538	+	98432	uc007cgu.2	311	ENSMUSG00000044340	Phlpp1	PH domain and leucine rich repeat protein phosphatase 1
265	chr1	106714082	106714082	1	*	0.00010202	0.00403204	8.15938e-05	0.00395045	Promoter (<=1kb)	chr1	106538178	106714290	176113	-	12043	uc007cgw.2	208	ENSMUSG00000057329	Bcl2	B cell leukemia/lymphoma 2
266	chr1	106714256	106714287	32	*	7.26353e-11	0.00356836	2.4204e-05	0.00354438	Promoter (<=1kb)	chr1	106538178	106714290	176113	-	12043	uc007cgw.2	3	ENSMUSG00000057329	Bcl2	B cell leukemia/lymphoma 2
267	chr1	106714368	106714368	1	*	0.000937303	0.000499813	0.0144226	-0.0139228	Promoter (<=1kb)	chr1	106538178	106714290	176113	-	12043	uc007cgw.2	-78	ENSMUSG00000057329	Bcl2	B cell leukemia/lymphoma 2
268	chr1	109349547	109349558	12	*	0.000126393	0.810036	0.967334	-0.157297	Distal Intergenic	chr1	109982327	110065797	83471	+	241201	uc007chv.1	-632780	ENSMUSG00000026312	Cdh7	cadherin 7, type 2
269	chr1	118321810	118321833	24	*	3.41025e-06	0.336106	0.00783431	0.328272	Promoter (<=1kb)	chr1	118321843	118329564	7722	+	67949	uc011wql.1	-33	ENSMUSG00000026377	Nifk	nucleolar protein interacting with the FHA domain of MKI67
270	chr1	118321973	118322018	46	*	9.25471e-07	0.340697	0.00561007	0.335087	Promoter (<=1kb)	chr1	118321843	118329564	7722	+	67949	uc011wql.1	175	ENSMUSG00000026377	Nifk	nucleolar protein interacting with the FHA domain of MKI67
271	chr1	119421251	119421258	8	*	5.41103e-13	0.345222	0.000507825	0.344714	Promoter (<=1kb)	chr1	119415465	119422248	6784	-	16324	uc007cir.1	990	ENSMUSG00000037035	Inhbb	inhibin beta-B
272	chr1	119421790	119421793	4	*	6.08196e-09	0.379019	0.00174696	0.377272	Promoter (<=1kb)	chr1	119415465	119422248	6784	-	16324	uc007cir.1	455	ENSMUSG00000037035	Inhbb	inhibin beta-B
273	chr1	119421814	119421988	175	*	4.30454e-09	4.43404e-05	0.00968562	-0.00965353	Promoter (<=1kb)	chr1	119415465	119422248	6784	-	16324	uc007cir.1	260	ENSMUSG00000037035	Inhbb	inhibin beta-B
274	chr1	119422315	119422394	80	*	9.12859e-09	0.389372	0.00193888	0.387405	Promoter (<=1kb)	chr1	119415465	119422248	6784	-	16324	uc007cir.1	-67	ENSMUSG00000037035	Inhbb	inhibin beta-B
275	chr1	119504344	119504440	97	*	1.93579e-11	0.000700976	0.323429	-0.322728	Promoter (<=1kb)	chr1	119470305	119504782	34478	-	64143	uc007cis.2	342	ENSMUSG00000004451	Ralb	v-ral simian leukemia viral oncogene homolog B (ras related)
276	chr1	119648369	119648407	39	*	8.08066e-08	0.332312	0.00297096	0.329341	Promoter (<=1kb)	chr1	119594824	119648617	53794	-	226352	uc007cix.2	210	ENSMUSG00000026383	Epb41l5	erythrocyte membrane protein band 4.1 like 5
277	chr1	119648466	119648543	78	*	2.83845e-10	3.36928e-05	0.00979705	-0.00967713	Promoter (<=1kb)	chr1	119594824	119648617	53794	-	226352	uc007cix.2	74	ENSMUSG00000026383	Epb41l5	erythrocyte membrane protein band 4.1 like 5
278	chr1	119648944	119648957	14	*	0.00245218	0.00127026	0.0217538	-0.0203359	Promoter (<=1kb)	chr1	119545033	119649000	103968	-	226352	uc007ciw.2	43	ENSMUSG00000026383	Epb41l5	erythrocyte membrane protein band 4.1 like 5
279	chr1	119837203	119837250	48	*	3.57614e-08	0.334818	0.00252315	0.332295	Promoter (<=1kb)	chr1	119658093	119837071	178979	-	19258	uc007ciz.1	-132	ENSMUSG00000026384	Ptpn4	protein tyrosine phosphatase, non-receptor type 4
280	chr1	120601477	120601526	50	*	0.000853138	0.270215	0.482166	-0.227218	Promoter (1-2kb)	chr1	120602487	120607991	5505	+	13798	uc007cjm.2	-1010	ENSMUSG00000058665	En1	engrailed 1
281	chr1	121327494	121327569	76	*	2.08996e-10	0.00507143	2.65104e-05	0.00504492	Promoter (<=1kb)	chr1	121304353	121327678	23326	-	72999	uc007cjo.1	109	ENSMUSG00000003721	Insig2	insulin induced gene 2
282	chr1	121431190	121431254	65	*	2.8144e-09	0.338225	0.00175971	0.336283	Promoter (<=1kb)	chr1	121431067	121444022	12956	+	70829	uc007cjr.1	187	ENSMUSG00000026339	Ccdc93	coiled-coil domain containing 93
283	chr1	125435928	125435976	49	*	3.89985e-10	0.00136137	0.331001	-0.329639	Promoter (<=1kb)	chr1	125392905	125435727	42823	-	74117	uc007cke.2	-201	ENSMUSG00000026341	Actr3	ARP3 actin-related protein 3
284	chr1	127205807	127205883	77	*	4.46016e-06	0.00799706	0.328972	-0.321266	Promoter (<=1kb)	chr1	127204986	127388212	183227	+	107895	uc007ckp.1	897	ENSMUSG00000036155	Mgat5	mannoside acetylglucosaminyltransferase 5
285	chr1	128103349	128103358	10	*	0.000253895	0.00261907	7.48406e-05	0.00254423	Promoter (<=1kb)	chr1	128103306	128184654	81349	+	226412	uc007clh.1	52	ENSMUSG00000056211	R3hdm1	R3H domain containing 1
286	chr1	128103434	128103434	1	*	0.000334041	0.000120111	0.00404021	-0.0039201	Promoter (<=1kb)	chr1	128103306	128184654	81349	+	226412	uc007clh.1	128	ENSMUSG00000056211	R3hdm1	R3H domain containing 1
287	chr1	128103508	128103518	11	*	5.07058e-09	0.341457	0.00215143	0.339306	Promoter (<=1kb)	chr1	128103306	128184654	81349	+	226412	uc007clh.1	212	ENSMUSG00000056211	R3hdm1	R3H domain containing 1
288	chr1	128103634	128103677	44	*	1.17035e-09	0.342407	0.00185223	0.340554	Promoter (<=1kb)	chr1	128103306	128184654	81349	+	226412	uc007clh.1	371	ENSMUSG00000056211	R3hdm1	R3H domain containing 1
289	chr1	130715740	130715740	1	*	3.37694e-13	0.000442798	0.336096	-0.335653	Promoter (<=1kb)	chr1	130670202	130715821	45620	-	18640	uc007cmd.2	81	ENSMUSG00000026409	Pfkfb2	6-phosphofructo-2-kinase/fructose-2,6-biphosphatase 2
290	chr1	131097968	131098020	53	*	8.7538e-06	0.00242127	3.9123e-05	0.00238215	Promoter (<=1kb)	chr1	131053704	131097543	43840	-	17164	uc007cmv.1	-425	ENSMUSG00000016528	Mapkapk2	MAP kinase-activated protein kinase 2
291	chr1	131527954	131528022	69	*	0.000404177	0.00594243	0.180287	-0.174273	Promoter (<=1kb)	chr1	131527989	131539872	11884	+	108900	uc007cnk.1	0	ENSMUSG00000055184	Fam72a	family with sequence similarity 72, member A
292	chr1	131828427	131828448	22	*	1.23184e-09	0.300152	0.00109992	0.299052	Promoter (<=1kb)	chr1	131828012	131848864	20853	+	98396	uc007cnu.3	436	ENSMUSG00000013275	Slc41a1	solute carrier family 41, member 1
293	chr1	131910594	131910677	84	*	1.18514e-07	0.00258266	0.299573	-0.297346	Promoter (<=1kb)	chr1	131910458	131936321	25864	+	98415	uc007cnx.2	219	ENSMUSG00000026434	Nucks1	nuclear casein kinase and cyclin-dependent kinase substrate 1
294	chr1	131910915	131910984	70	*	0.000684841	0.101986	0.00635874	0.0957241	Promoter (<=1kb)	chr1	131910458	131936321	25864	+	98415	uc007cnx.2	526	ENSMUSG00000026434	Nucks1	nuclear casein kinase and cyclin-dependent kinase substrate 1
295	chr1	132316050	132316099	50	*	2.10206e-07	0.00322258	0.323514	-0.320291	Promoter (<=1kb)	chr1	132316125	132333488	17364	+	74137	uc007coo.2	-75	ENSMUSG00000009772	Nuak2	NUAK family, SNF1-like kinase, 2
296	chr1	132391507	132391537	31	*	3.87952e-05	0.000547238	2.46781e-05	0.00052256	Promoter (<=1kb)	chr1	132356315	132391281	34967	-	68875	uc007cot.1	-226	ENSMUSG00000042066	Tmcc2	transmembrane and coiled-coil domains 2
297	chr1	132391545	132391549	5	*	0.00134954	0.00262336	0.0874917	-0.0848683	Promoter (<=1kb)	chr1	132356315	132391281	34967	-	68875	uc007cot.1	-264	ENSMUSG00000042066	Tmcc2	transmembrane and coiled-coil domains 2
298	chr1	132391556	132391882	327	*	1.17349e-06	0.343727	0.013283	0.329446	Promoter (<=1kb)	chr1	132356315	132391281	34967	-	68875	uc007cot.1	-275	ENSMUSG00000042066	Tmcc2	transmembrane and coiled-coil domains 2
299	chr1	133045852	133045907	56	*	2.55402e-07	4.22329e-05	0.00394881	-0.00390658	Promoter (<=1kb)	chr1	133046012	133068033	22022	+	240752	uc007cpq.1	-160	ENSMUSG00000026447	Pik3c2b	phosphoinositide-3-kinase, class 2, beta polypeptide
300	chr1	133163983	133164028	46	*	3.44154e-08	0.00478639	3.47061e-05	0.00475284	Distal Intergenic	chr1	133131344	133139800	8457	+	108954	uc007cps.2	32684	ENSMUSG00000046062	Ppp1r15b	protein phosphatase 1, regulatory (inhibitor) subunit 15b
301	chr1	133260033	133260044	12	*	0.000341306	0.432601	0.694843	-0.262242	5' UTR	chr1	133249852	133269808	19957	-	100502933	uc007cpw.2	9764	ENSMUSG00000101693	Gm19461	predicted gene, 19461
302	chr1	133661130	133661130	1	*	1.74633e-11	0.339509	0.000837494	0.338671	Promoter (<=1kb)	chr1	133655879	133660885	5007	-	667118	uc007cqr.2	-245	ENSMUSG00000102049	Zbed6	zinc finger, BED type containing 6
303	chr1	133661516	133661538	23	*	1.29008e-11	0.33901	0.000781962	0.338228	Promoter (<=1kb)	chr1	133619871	133661399	41529	-	70579	uc007cqn.2	-117	ENSMUSG00000102976	Zc3h11a	zinc finger CCCH type containing 11A
304	chr1	134361918	134362027	110	*	0.00180329	0.0290369	0.000920471	0.0278086	Promoter (<=1kb)	chr1	134346097	134361999	15903	-	57439	uc007crq.1	0	ENSMUSG00000042305	Tmem183a	transmembrane protein 183A
305	chr1	134415384	134415386	3	*	6.56966e-09	0.00790407	3.46587e-05	0.00786941	Promoter (<=1kb)	chr1	134415467	134432341	16875	+	72674	uc007crx.1	-83	ENSMUSG00000026457	Adipor1	adiponectin receptor 1
306	chr1	134415498	134415514	17	*	7.83909e-07	0.000471267	0.0320649	-0.0315904	Promoter (<=1kb)	chr1	134415467	134432341	16875	+	72674	uc007crx.1	47	ENSMUSG00000026457	Adipor1	adiponectin receptor 1
307	chr1	134415676	134415803	128	*	1.09479e-09	0.339592	0.00175156	0.337912	Promoter (<=1kb)	chr1	134415760	134432341	16582	+	72674	uc007cry.1	0	ENSMUSG00000026457	Adipor1	adiponectin receptor 1
308	chr1	134560436	134560496	61	*	4.8756e-06	0.00342148	0.23999	-0.236198	Promoter (<=1kb)	chr1	134560178	134606791	46614	+	75605	uc007csf.2	318	ENSMUSG00000042207	Kdm5b	lysine (K)-specific demethylase 5B
309	chr1	134962423	134962466	44	*	4.23376e-08	0.01142	4.69476e-05	0.0113731	Promoter (<=1kb)	chr1	134962565	134974179	11615	+	67196	uc007csp.2	-142	ENSMUSG00000026429	Ube2t	ubiquitin-conjugating enzyme E2T (putative)
310	chr1	134962871	134962877	7	*	0.000125054	0.0185094	0.000463764	0.0180456	Promoter (<=1kb)	chr1	134962565	134974179	11615	+	67196	uc007csp.2	312	ENSMUSG00000026429	Ube2t	ubiquitin-conjugating enzyme E2T (putative)
311	chr1	135147086	135147123	38	*	5.59154e-05	2.30507e-05	0.00050337	-0.000480326	Promoter (<=1kb)	chr1	135146834	135156268	9435	+	68724	uc007csu.1	289	ENSMUSG00000026426	Arl8a	ADP-ribosylation factor-like 8A
312	chr1	135147473	135147473	1	*	0.00246041	0.00011896	2.29949e-05	9.59649e-05	Promoter (<=1kb)	chr1	135146834	135156268	9435	+	68724	uc007csu.1	639	ENSMUSG00000026426	Arl8a	ADP-ribosylation factor-like 8A
313	chr1	135283943	135283943	1	*	6.69937e-07	0.00140045	2.31721e-05	0.00137728	Promoter (<=1kb)	chr1	135262699	135284084	21386	-	215615	uc007csy.2	141	ENSMUSG00000041926	Rnpep	arginyl aminopeptidase (aminopeptidase B)
314	chr1	135430223	135430250	28	*	7.39417e-07	0.00312853	0.299021	-0.295893	Promoter (<=1kb)	chr1	135382315	135430491	48177	-	226432	uc007cte.1	241	ENSMUSG00000041879	Ipo9	importin 9
315	chr1	135430546	135430595	50	*	1.86004e-14	0.34544	0.000329744	0.34511	Promoter (<=1kb)	chr1	135382315	135430491	48177	-	226432	uc007cte.1	-55	ENSMUSG00000041879	Ipo9	importin 9
316	chr1	135766084	135766099	16	*	1.08929e-13	0.00042646	0.34502	-0.344593	Promoter (<=1kb)	chr1	135766085	135769134	3050	+	27280	uc007ctq.2	0	ENSMUSG00000041801	Phlda3	pleckstrin homology-like domain, family A, member 3
317	chr1	136415412	136415456	45	*	2.77211e-07	0.338703	0.00507559	0.333628	Promoter (<=1kb)	chr1	136411916	136415519	3604	-	320054	uc007cus.1	63	ENSMUSG00000097403	9230116N13Rik	RIKEN cDNA 9230116N13 gene
318	chr1	136466371	136466391	21	*	2.05321e-10	2.87135e-05	0.00374994	-0.00372123	Promoter (1-2kb)	chr1	136467848	136530819	62972	+	381293	uc007cuv.2	-1477	ENSMUSG00000041498	Kif14	kinesin family member 14
319	chr1	136625024	136625064	41	*	1.79038e-11	0.345659	0.000848449	0.344811	Promoter (<=1kb)	chr1	136624901	136630391	5491	+	226442	uc007cuw.2	163	ENSMUSG00000041483	Zfp281	zinc finger protein 281
320	chr1	138619359	138619521	163	*	4.57597e-11	0.344138	0.000605805	0.343116	Promoter (<=1kb)	chr1	138484714	138619696	134983	-	59125	uc007cvn.1	175	ENSMUSG00000026393	Nek7	NIMA (never in mitosis gene a)-related expressed kinase 7
321	chr1	139422356	139422401	46	*	0.000709481	0.00900853	0.000313296	0.00873812	Promoter (<=1kb)	chr1	139422383	139453007	30625	+	226470	uc007cwg.2	0	ENSMUSG00000033964	Zbtb41	zinc finger and BTB domain containing 41 homolog
322	chr1	139422450	139422538	89	*	2.4526e-06	0.00588018	0.323044	-0.317121	Promoter (<=1kb)	chr1	139422383	139453007	30625	+	226470	uc007cwg.2	155	ENSMUSG00000033964	Zbtb41	zinc finger and BTB domain containing 41 homolog
323	chr1	139422704	139422718	15	*	0.00233837	0.00246366	0.0387684	-0.0363533	Promoter (<=1kb)	chr1	139423034	139453007	29974	+	226470	uc011wtd.1	-330	ENSMUSG00000033964	Zbtb41	zinc finger and BTB domain containing 41 homolog
324	chr1	143702399	143702485	87	*	2.82366e-09	0.00134864	0.31342	-0.31202	Promoter (<=1kb)	chr1	143607499	143702684	95186	-	214498	uc007cwx.1	199	ENSMUSG00000026361	Cdc73	cell division cycle 73, Paf1/RNA polymerase II complex component
325	chr1	143739497	143739503	7	*	2.96857e-06	0.00130972	3.75086e-05	0.00127221	Promoter (<=1kb)	chr1	143739568	143749678	10111	+	69367	uc007cxa.1	-71	ENSMUSG00000018196	Glrx2	glutaredoxin 2 (thioltransferase)
326	chr1	143739509	143739513	5	*	1.60625e-09	0.00161367	0.312641	-0.311028	Promoter (<=1kb)	chr1	143739568	143749678	10111	+	69367	uc007cxa.1	-59	ENSMUSG00000018196	Glrx2	glutaredoxin 2 (thioltransferase)
327	chr1	143739519	143739535	17	*	1.61389e-05	0.00228351	7.03139e-05	0.0022132	Promoter (<=1kb)	chr1	143739568	143749678	10111	+	69367	uc007cxa.1	-49	ENSMUSG00000018196	Glrx2	glutaredoxin 2 (thioltransferase)
328	chr1	143739537	143739540	4	*	1.49549e-07	0.00292438	0.288191	-0.285267	Promoter (<=1kb)	chr1	143739568	143749678	10111	+	69367	uc007cxa.1	-31	ENSMUSG00000018196	Glrx2	glutaredoxin 2 (thioltransferase)
329	chr1	143739546	143739646	101	*	6.85132e-09	0.00532039	5.42996e-05	0.00527043	Promoter (<=1kb)	chr1	143739568	143749678	10111	+	69367	uc007cxa.1	0	ENSMUSG00000018196	Glrx2	glutaredoxin 2 (thioltransferase)
330	chr1	143739728	143739829	102	*	0.000149319	0.0126392	0.295553	-0.284408	Promoter (<=1kb)	chr1	143739615	143749678	10064	+	69367	uc007cxb.1	214	ENSMUSG00000018196	Glrx2	glutaredoxin 2 (thioltransferase)
331	chr1	144004131	144004163	33	*	8.09606e-09	0.00314967	0.323056	-0.319907	Promoter (<=1kb)	chr1	143999338	144004149	4812	-	19735	uc007cxg.2	0	ENSMUSG00000026360	Rgs2	regulator of G-protein signaling 2
332	chr1	144004303	144004324	22	*	3.73662e-06	0.00608589	0.312303	-0.306652	Promoter (<=1kb)	chr1	143999338	144004149	4812	-	19735	uc007cxg.2	-154	ENSMUSG00000026360	Rgs2	regulator of G-protein signaling 2
333	chr1	151344617	151344675	59	*	8.47467e-08	0.00302978	0.310789	-0.307616	Promoter (<=1kb)	chr1	151344498	151356798	12301	+	117198	uc007cym.1	177	ENSMUSG00000023150	Ivns1abp	influenza virus NS1A binding protein
334	chr1	152089938	152089942	5	*	0.00132841	0.00474216	0.236515	-0.231773	Promoter (<=1kb)	chr1	151852403	152090320	237918	-	69399	uc007czd.2	378	ENSMUSG00000032666	1700025G04Rik	RIKEN cDNA 1700025G04 gene
335	chr1	152090022	152090126	105	*	2.77458e-09	0.00526648	3.44285e-05	0.00523205	Promoter (<=1kb)	chr1	151852403	152090320	237918	-	69399	uc007czd.2	194	ENSMUSG00000032666	1700025G04Rik	RIKEN cDNA 1700025G04 gene
336	chr1	152090137	152090139	3	*	2.29564e-09	0.00189297	0.345836	-0.343943	Promoter (<=1kb)	chr1	151852403	152090320	237918	-	69399	uc007czd.2	181	ENSMUSG00000032666	1700025G04Rik	RIKEN cDNA 1700025G04 gene
337	chr1	152090141	152090141	1	*	1.38528e-06	0.00183073	2.57913e-05	0.00180494	Promoter (<=1kb)	chr1	151852403	152090320	237918	-	69399	uc007czd.2	179	ENSMUSG00000032666	1700025G04Rik	RIKEN cDNA 1700025G04 gene
338	chr1	152090328	152090328	1	*	3.08233e-05	0.000473294	2.36992e-05	0.000449595	Promoter (<=1kb)	chr1	151852403	152090320	237918	-	69399	uc007czd.2	-8	ENSMUSG00000032666	1700025G04Rik	RIKEN cDNA 1700025G04 gene
339	chr1	152386424	152386424	1	*	1.64182e-07	0.0033003	0.383848	-0.380548	Promoter (<=1kb)	chr1	152370736	152386682	15947	-	66637	uc007czf.2	258	ENSMUSG00000014980	Tsen15	tRNA splicing endonuclease 15 homolog (S. cerevisiae)
340	chr1	152386429	152386429	1	*	1.08112e-05	0.00436513	5.82285e-05	0.0043069	Promoter (<=1kb)	chr1	152370736	152386682	15947	-	66637	uc007czf.2	253	ENSMUSG00000014980	Tsen15	tRNA splicing endonuclease 15 homolog (S. cerevisiae)
341	chr1	152386432	152386490	59	*	3.70059e-08	0.00256428	0.388028	-0.385414	Promoter (<=1kb)	chr1	152370736	152386682	15947	-	66637	uc007czf.2	192	ENSMUSG00000014980	Tsen15	tRNA splicing endonuclease 15 homolog (S. cerevisiae)
342	chr1	152386649	152386685	37	*	0.000393519	0.319931	0.0214173	0.298514	Promoter (<=1kb)	chr1	152370736	152386682	15947	-	66637	uc007czf.2	0	ENSMUSG00000014980	Tsen15	tRNA splicing endonuclease 15 homolog (S. cerevisiae)
343	chr1	152902044	152902076	33	*	3.38371e-05	0.0090272	0.28445	-0.275423	Promoter (<=1kb)	chr1	152836995	152902646	65652	-	226517	uc007czo.2	570	ENSMUSG00000042772	Smg7	Smg-7 homolog, nonsense mediated mRNA decay factor (C. elegans)
344	chr1	152902194	152902202	9	*	1.20201e-14	0.000275735	0.344916	-0.34464	Promoter (<=1kb)	chr1	152836995	152902646	65652	-	226517	uc007czo.2	444	ENSMUSG00000042772	Smg7	Smg-7 homolog, nonsense mediated mRNA decay factor (C. elegans)
345	chr1	152902874	152902950	77	*	2.73533e-11	0.00105756	0.346331	-0.345275	Promoter (<=1kb)	chr1	152836995	152902646	65652	-	226517	uc007czo.2	-228	ENSMUSG00000042772	Smg7	Smg-7 homolog, nonsense mediated mRNA decay factor (C. elegans)
346	chr1	152903815	152903863	49	*	9.63053e-06	0.00101638	2.59104e-05	0.000990473	Promoter (1-2kb)	chr1	152836995	152902646	65652	-	226517	uc007czo.2	-1169	ENSMUSG00000042772	Smg7	Smg-7 homolog, nonsense mediated mRNA decay factor (C. elegans)
347	chr1	153101217	153101248	32	*	0.00056493	0.855569	0.720469	0.135099	Intron (uc007czq.1/226518, intron 8 of 10)	chr1	153122756	153186447	63692	-	16782	uc007czr.1	85199	ENSMUSG00000026479	Lamc2	laminin, gamma 2
348	chr1	153487356	153487427	72	*	1.26313e-12	0.00310626	2.47211e-05	0.00308169	Promoter (<=1kb)	chr1	153455758	153487660	31903	-	13211	uc007czy.1	233	ENSMUSG00000042699	Dhx9	DEAH (Asp-Glu-Ala-His) box polypeptide 9
349	chr1	153487675	153487681	7	*	0.000134378	0.191183	0.00282738	0.188355	Promoter (<=1kb)	chr1	153455758	153487660	31903	-	13211	uc007czy.1	-15	ENSMUSG00000042699	Dhx9	DEAH (Asp-Glu-Ala-His) box polypeptide 9
350	chr1	153899802	153899857	56	*	2.81278e-05	0.00505103	0.251093	-0.246042	Promoter (<=1kb)	chr1	153899926	153900036	111	+	102466257	uc033fml.1	-124	ENSMUSG00000099227	Mir8114	microRNA 8114
351	chr1	155098327	155098419	93	*	2.02394e-10	0.340999	0.00128563	0.339713	Promoter (1-2kb)	chr1	155096367	155099636	3270	-	15939	uc007dax.2	1217	ENSMUSG00000056708	Ier5	immediate early response 5
352	chr1	155098424	155098424	1	*	0.000961735	2.30464e-05	0.000168	-0.000144954	Promoter (1-2kb)	chr1	155096367	155099636	3270	-	15939	uc007dax.2	1212	ENSMUSG00000056708	Ier5	immediate early response 5
353	chr1	155098591	155098606	16	*	1.79137e-06	0.334749	0.00570386	0.329045	Promoter (1-2kb)	chr1	155096367	155099636	3270	-	15939	uc007dax.2	1030	ENSMUSG00000056708	Ier5	immediate early response 5
354	chr1	155098870	155098898	29	*	4.20242e-11	0.00117525	0.345415	-0.34424	Promoter (<=1kb)	chr1	155096367	155099636	3270	-	15939	uc007dax.2	738	ENSMUSG00000056708	Ier5	immediate early response 5
355	chr1	155099125	155099144	20	*	1.3616e-07	0.00402576	0.345394	-0.341361	Promoter (<=1kb)	chr1	155096367	155099636	3270	-	15939	uc007dax.2	492	ENSMUSG00000056708	Ier5	immediate early response 5
356	chr1	155417261	155417369	109	*	3.14347e-09	0.336768	0.00214133	0.334627	Promoter (<=1kb)	chr1	155275657	155417444	141788	-	19775	uc007dbf.1	75	ENSMUSG00000026469	Xpr1	xenotropic and polytropic retrovirus receptor 1
357	chr1	155973133	155973217	85	*	6.78301e-05	0.0115013	0.000368513	0.0111328	Promoter (<=1kb)	chr1	155844964	155973255	128292	-	74081	uc007dbs.2	38	ENSMUSG00000033671	Cep350	centrosomal protein 350
358	chr1	155973223	155973226	4	*	0.000916399	0.0141836	0.236171	-0.221988	Promoter (<=1kb)	chr1	155844964	155973255	128292	-	74081	uc007dbs.2	29	ENSMUSG00000033671	Cep350	centrosomal protein 350
359	chr1	155973229	155973229	1	*	6.29205e-06	0.0133657	0.000256038	0.0131096	Promoter (<=1kb)	chr1	155844964	155973255	128292	-	74081	uc007dbs.2	26	ENSMUSG00000033671	Cep350	centrosomal protein 350
360	chr1	155973231	155973231	1	*	0.000499587	0.0131316	0.245513	-0.232381	Promoter (<=1kb)	chr1	155844964	155973255	128292	-	74081	uc007dbs.2	24	ENSMUSG00000033671	Cep350	centrosomal protein 350
361	chr1	156035681	156035728	48	*	1.02637e-07	0.00184816	2.55365e-05	0.00182262	Promoter (<=1kb)	chr1	156035727	156053736	18010	+	240832	uc007dby.2	0	ENSMUSG00000050565	Tor1aip2	torsin A interacting protein 2
362	chr1	156035911	156035952	42	*	2.56724e-05	0.00334917	6.59078e-05	0.00328326	Promoter (<=1kb)	chr1	156035727	156053736	18010	+	240832	uc007dby.2	225	ENSMUSG00000050565	Tor1aip2	torsin A interacting protein 2
363	chr1	156035961	156035961	1	*	2.11635e-06	0.00386065	0.292326	-0.288465	Promoter (<=1kb)	chr1	156035727	156053736	18010	+	240832	uc007dby.2	234	ENSMUSG00000050565	Tor1aip2	torsin A interacting protein 2
364	chr1	156204253	156204254	2	*	0.000790258	0.15449	0.322769	-0.168278	Promoter (<=1kb)	chr1	156075956	156205026	129071	-	329274	uc033fmn.1	772	ENSMUSG00000015484	Fam163a	family with sequence similarity 163, member A
365	chr1	156420949	156420999	51	*	2.01889e-11	0.0141017	5.71691e-05	0.013379	Distal Intergenic	chr1	156428108	156474328	46221	-	20652	uc007dcj.1	53329	ENSMUSG00000026600	Soat1	sterol O-acyltransferase 1
366	chr1	156558702	156558720	19	*	0.000834424	0.0119494	0.163835	-0.152722	Promoter (<=1kb)	chr1	156558787	156649619	90833	+	11352	uc007dcl.2	-85	ENSMUSG00000026596	Abl2	v-abl Abelson murine leukemia viral oncogene 2 (arg, Abelson-related gene)
367	chr1	156559068	156559084	17	*	2.24787e-05	2.59054e-05	0.00071769	-0.000691785	Promoter (<=1kb)	chr1	156558787	156649619	90833	+	11352	uc007dcl.2	297	ENSMUSG00000026596	Abl2	v-abl Abelson murine leukemia viral oncogene 2 (arg, Abelson-related gene)
368	chr1	156559245	156559278	34	*	1.03682e-08	0.00475221	2.92551e-05	0.0047233	Promoter (<=1kb)	chr1	156558787	156649619	90833	+	11352	uc007dcl.2	491	ENSMUSG00000026596	Abl2	v-abl Abelson murine leukemia viral oncogene 2 (arg, Abelson-related gene)
369	chr1	156559283	156559283	1	*	2.85398e-07	0.00472583	0.340629	-0.335903	Promoter (<=1kb)	chr1	156558787	156649619	90833	+	11352	uc007dcl.2	496	ENSMUSG00000026596	Abl2	v-abl Abelson murine leukemia viral oncogene 2 (arg, Abelson-related gene)
370	chr1	156674389	156674415	27	*	7.41848e-17	0.000137901	0.346848	-0.34671	Promoter (<=1kb)	chr1	156653617	156674339	20723	-	30935	uc007dcn.2	-50	ENSMUSG00000060519	Tor3a	torsin family 3, member A
371	chr1	156674505	156674540	36	*	5.28478e-09	0.00716453	4.51124e-05	0.00711942	Promoter (<=1kb)	chr1	156653617	156674339	20723	-	30935	uc007dcn.2	-166	ENSMUSG00000060519	Tor3a	torsin family 3, member A
372	chr1	156719054	156719058	5	*	4.47641e-05	0.00155281	4.02302e-05	0.00151258	Promoter (<=1kb)	chr1	156678571	156718910	40340	-	215015	uc007dcp.1	-144	ENSMUSG00000033557	Fam20b	family with sequence similarity 20, member B
373	chr1	156719143	156719149	7	*	6.2094e-06	0.000605257	0.0229669	-0.0223616	Promoter (<=1kb)	chr1	156678571	156718910	40340	-	215015	uc007dcp.1	-233	ENSMUSG00000033557	Fam20b	family with sequence similarity 20, member B
374	chr1	156939257	156939381	125	*	3.58214e-10	0.00361574	2.62608e-05	0.00358948	Promoter (<=1kb)	chr1	156804166	156939387	135222	-	78255	uc011wui.1	6	ENSMUSG00000026594	Ralgps2	Ral GEF with PH domain and SH3 binding motif 2
375	chr1	156939540	156939577	38	*	1.27011e-05	2.34159e-05	0.000678632	-0.000655217	Promoter (<=1kb)	chr1	156804166	156939626	135461	-	78255	uc007dcu.2	49	ENSMUSG00000026594	Ralgps2	Ral GEF with PH domain and SH3 binding motif 2
376	chr1	156939584	156939587	4	*	1.53759e-10	0.34445	0.00113808	0.343312	Promoter (<=1kb)	chr1	156804166	156939626	135461	-	78255	uc007dcu.2	39	ENSMUSG00000026594	Ralgps2	Ral GEF with PH domain and SH3 binding motif 2
377	chr1	157086778	157086779	2	*	8.2892e-07	0.237739	0.00229369	0.235445	Distal Intergenic	chr1	157099147	157108650	9504	-	73435	uc007dde.2	21871	ENSMUSG00000026592	Tex35	testis expressed 35
378	chr1	157412202	157412274	73	*	6.39962e-10	0.342394	0.00177128	0.340623	Promoter (<=1kb)	chr1	157412352	157420236	7885	+	69953	uc007ddi.1	-150	ENSMUSG00000049881	2810025M15Rik	RIKEN cDNA 2810025M15 gene
379	chr1	157412353	157412353	1	*	5.83592e-06	5.0046e-05	0.0031791	-0.00312905	Promoter (<=1kb)	chr1	157412352	157420236	7885	+	69953	uc007ddi.1	1	ENSMUSG00000049881	2810025M15Rik	RIKEN cDNA 2810025M15 gene
380	chr1	157465764	157465765	2	*	6.52733e-05	0.955028	0.840993	0.114035	Exon (uc007ddj.1/226527, exon 6 of 10)	chr1	157458582	157488733	30152	+	226527	uc007ddj.1	7183	ENSMUSG00000033488	BC026585	cDNA sequence BC026585
381	chr1	160212400	160212407	8	*	1.14216e-09	0.00139804	0.332834	-0.331436	Promoter (<=1kb)	chr1	160202367	160212892	10526	-	12301	uc007deg.2	485	ENSMUSG00000014226	Cacybp	calcyclin binding protein
382	chr1	160212592	160212592	1	*	0.000515694	0.133453	0.00458412	0.128869	Promoter (<=1kb)	chr1	160202367	160212892	10526	-	12301	uc007deg.2	300	ENSMUSG00000014226	Cacybp	calcyclin binding protein
383	chr1	160212807	160212881	75	*	2.51007e-06	0.0047759	5.85223e-05	0.0047177	Promoter (<=1kb)	chr1	160202367	160212892	10526	-	12301	uc007deg.2	11	ENSMUSG00000014226	Cacybp	calcyclin binding protein
384	chr1	161034549	161034615	67	*	0.000329587	0.0322488	0.0012456	0.0310032	Promoter (<=1kb)	chr1	161008794	161034848	26055	-	240869	uc007deo.1	233	ENSMUSG00000043467	Zbtb37	zinc finger and BTB domain containing 37
385	chr1	161034702	161034782	81	*	6.03951e-08	2.75124e-05	0.00190972	-0.00188211	Promoter (<=1kb)	chr1	161008794	161034848	26055	-	240869	uc007deo.1	66	ENSMUSG00000043467	Zbtb37	zinc finger and BTB domain containing 37
386	chr1	161131534	161131575	42	*	3.20265e-05	0.00487683	0.242186	-0.237309	Promoter (<=1kb)	chr1	161088378	161131479	43102	-	226541	uc007dff.1	-55	ENSMUSG00000026705	Klhl20	kelch-like 20
387	chr1	161250799	161250799	1	*	3.22954e-06	2.41096e-05	0.00114906	-0.00112495	Promoter (<=1kb)	chr1	161240112	161251210	11099	-	11758	uc007dfl.2	411	ENSMUSG00000026701	Prdx6	peroxiredoxin 6
388	chr1	161250819	161250837	19	*	9.22984e-10	0.343749	0.00151927	0.342229	Promoter (<=1kb)	chr1	161240112	161251210	11099	-	11758	uc007dfl.2	373	ENSMUSG00000026701	Prdx6	peroxiredoxin 6
389	chr1	162739810	162739868	59	*	7.87338e-09	7.11101e-05	0.0120013	-0.0119305	Promoter (<=1kb)	chr1	162671785	162740556	68772	-	226562	uc007dgr.1	688	ENSMUSG00000040225	Prrc2c	proline-rich coiled-coil 2C
390	chr1	162740299	162740376	78	*	1.92242e-05	0.335637	0.0125821	0.324355	Promoter (<=1kb)	chr1	162671785	162740556	68772	-	226562	uc007dgr.1	180	ENSMUSG00000040225	Prrc2c	proline-rich coiled-coil 2C
391	chr1	163308873	163308908	36	*	2.27489e-07	0.00299182	0.335635	-0.332662	Intron (uc007dhh.1/18933, intron 4 of 4)	chr1	163245119	163313650	68532	-	18933	uc007dhh.1	4742	ENSMUSG00000026586	Prrx1	paired related homeobox 1
392	chr1	163929790	163929897	108	*	1.50197e-08	5.785e-05	0.00702327	-0.00696542	Promoter (<=1kb)	chr1	163929765	163955126	25362	+	240880	uc007dhq.2	132	ENSMUSG00000026584	Scyl3	SCY1-like 3 (S. cerevisiae)
393	chr1	164248571	164248571	1	*	2.91973e-05	0.00793695	0.283978	-0.276041	Promoter (<=1kb)	chr1	164249046	164265385	16340	+	116914	uc007did.2	-475	ENSMUSG00000040918	Slc19a2	solute carrier family 19 (thiamine transporter), member 2
394	chr1	164248895	164248976	82	*	5.14848e-13	0.344174	0.00056991	0.343598	Promoter (<=1kb)	chr1	164249046	164265385	16340	+	116914	uc007did.2	-151	ENSMUSG00000040918	Slc19a2	solute carrier family 19 (thiamine transporter), member 2
395	chr1	164249136	164249149	14	*	4.27657e-06	0.30075	0.0054019	0.295348	Promoter (<=1kb)	chr1	164249046	164265385	16340	+	116914	uc007did.2	103	ENSMUSG00000040918	Slc19a2	solute carrier family 19 (thiamine transporter), member 2
396	chr1	164249351	164249404	54	*	3.35397e-12	0.345108	0.000776221	0.344276	Promoter (<=1kb)	chr1	164249046	164265385	16340	+	116914	uc007did.2	358	ENSMUSG00000040918	Slc19a2	solute carrier family 19 (thiamine transporter), member 2
397	chr1	164249632	164249661	30	*	1.95451e-70	0.00763257	2.35851e-05	0.00760899	Promoter (<=1kb)	chr1	164249046	164265385	16340	+	116914	uc007did.2	615	ENSMUSG00000040918	Slc19a2	solute carrier family 19 (thiamine transporter), member 2
398	chr1	165194381	165194502	122	*	3.28585e-05	0.00760568	0.000126855	0.00747663	Promoter (<=1kb)	chr1	165174341	165194433	20093	-	108735	uc007dix.2	0	ENSMUSG00000040848	Sft2d2	SFT2 domain containing 2
399	chr1	165281816	165281854	39	*	1.29908e-05	0.000297838	0.0278111	-0.0275133	Distal Intergenic	chr1	165295766	165321851	26086	+	240888	uc007dja.1	-13950	ENSMUSG00000040836	Gpr161	G protein-coupled receptor 161
400	chr1	165281879	165281931	53	*	8.78116e-05	0.326578	0.0135091	0.313069	Distal Intergenic	chr1	165295766	165321851	26086	+	240888	uc007dja.1	-13887	ENSMUSG00000040836	Gpr161	G protein-coupled receptor 161
401	chr1	165634257	165634261	5	*	0.00147154	0.00014057	2.30781e-05	0.000117492	Promoter (<=1kb)	chr1	165592181	165634541	42361	-	68481	uc007djh.1	280	ENSMUSG00000026566	Mpzl1	myelin protein zero-like 1
402	chr1	165634427	165634437	11	*	4.71347e-05	0.268572	0.00846998	0.260313	Promoter (<=1kb)	chr1	165592181	165634541	42361	-	68481	uc007djh.1	104	ENSMUSG00000026566	Mpzl1	myelin protein zero-like 1
403	chr1	165634469	165634502	34	*	5.46124e-13	3.52464e-05	0.00942667	-0.00939143	Promoter (<=1kb)	chr1	165592181	165634541	42361	-	68481	uc007djh.1	39	ENSMUSG00000026566	Mpzl1	myelin protein zero-like 1
404	chr1	165634503	165634538	36	*	5.14858e-07	0.342019	0.00605877	0.336092	Promoter (<=1kb)	chr1	165592181	165634541	42361	-	68481	uc007djh.1	3	ENSMUSG00000026566	Mpzl1	myelin protein zero-like 1
405	chr1	165642855	165642869	15	*	0.00019657	0.00302042	0.0293962	-0.0263758	Distal Intergenic	chr1	165592181	165634541	42361	-	68481	uc007djh.1	-8314	ENSMUSG00000026566	Mpzl1	myelin protein zero-like 1
406	chr1	165844839	165844879	41	*	3.46022e-05	3.00479e-05	0.000957406	-0.000927358	Intron (uc007djn.2/12503, intron 1 of 7)	chr1	165875474	165880475	5002	-	18986	uc007djt.1	35596	ENSMUSG00000026565	Pou2f1	POU domain, class 2, transcription factor 1
407	chr1	166002385	166002434	50	*	2.15591e-07	4.28893e-05	0.00911432	-0.00907508	Promoter (<=1kb)	chr1	165865154	166002634	137481	-	18986	uc007djy.2	200	ENSMUSG00000026565	Pou2f1	POU domain, class 2, transcription factor 1
408	chr1	166002690	166002690	1	*	0.000431122	0.311279	0.0169071	0.294372	Promoter (<=1kb)	chr1	165865154	166002634	137481	-	18986	uc007djy.2	-56	ENSMUSG00000026565	Pou2f1	POU domain, class 2, transcription factor 1
409	chr1	166003514	166003514	1	*	0.00696992	0.000416855	0.00607824	-0.00566139	Promoter (<=1kb)	chr1	165865154	166002634	137481	-	18986	uc007djy.2	-880	ENSMUSG00000026565	Pou2f1	POU domain, class 2, transcription factor 1
410	chr1	166378975	166379018	44	*	5.28515e-10	0.296544	0.000946337	0.295597	Promoter (<=1kb)	chr1	166379167	166384108	4942	+	27878	uc007dkl.2	-192	ENSMUSG00000026563	Tada1	transcriptional adaptor 1
411	chr1	167284429	167284429	1	*	1.15728e-07	0.00226445	0.286983	-0.284718	Promoter (<=1kb)	chr1	167226084	167285127	59044	-	80914	uc007dku.2	698	ENSMUSG00000026558	Uck2	uridine-cytidine kinase 2
412	chr1	167284620	167284647	28	*	2.82769e-06	0.249373	0.00141019	0.247988	Promoter (<=1kb)	chr1	167226084	167285127	59044	-	80914	uc007dku.2	480	ENSMUSG00000026558	Uck2	uridine-cytidine kinase 2
413	chr1	167284681	167284765	85	*	3.09396e-07	0.00410365	0.321161	-0.317069	Promoter (<=1kb)	chr1	167226084	167285127	59044	-	80914	uc007dku.2	362	ENSMUSG00000026558	Uck2	uridine-cytidine kinase 2
414	chr1	167284954	167284955	2	*	1.88516e-08	0.345045	0.00249119	0.342554	Promoter (<=1kb)	chr1	167226084	167285127	59044	-	80914	uc007dku.2	172	ENSMUSG00000026558	Uck2	uridine-cytidine kinase 2
415	chr1	167285225	167285248	24	*	6.48775e-14	0.339581	0.00038676	0.339194	Promoter (<=1kb)	chr1	167226084	167285127	59044	-	80914	uc007dku.2	-98	ENSMUSG00000026558	Uck2	uridine-cytidine kinase 2
416	chr1	167309018	167309018	1	*	0.000582157	0.0513852	0.00302522	0.0483599	Promoter (<=1kb)	chr1	167308670	167333978	25309	+	68944	uc007dkv.1	348	ENSMUSG00000052428	Tmco1	transmembrane and coiled-coil domains 1
417	chr1	167394395	167394417	23	*	3.6962e-06	0.00410861	8.77312e-05	0.00402088	Promoter (<=1kb)	chr1	167372384	167393797	21414	-	66447	uc007dky.1	-598	ENSMUSG00000026688	Mgst3	microsomal glutathione S-transferase 3
418	chr1	167688768	167688800	33	*	4.70957e-12	0.0075587	3.48608e-05	0.00752384	Promoter (<=1kb)	chr1	167689558	167848733	159176	+	110648	uc007dlc.1	-790	ENSMUSG00000026686	Lmx1a	LIM homeobox transcription factor 1 alpha
419	chr1	167689086	167689132	47	*	0.00246866	0.00605452	0.0739001	-0.0687719	Promoter (<=1kb)	chr1	167689558	167848733	159176	+	110648	uc007dlc.1	-472	ENSMUSG00000026686	Lmx1a	LIM homeobox transcription factor 1 alpha
420	chr1	170174801	170174910	110	*	1.37716e-11	0.000798546	0.344944	-0.344089	Promoter (<=1kb)	chr1	170141223	170174964	33742	-	107652	uc007dlw.2	54	ENSMUSG00000026670	Uap1	UDP-N-acetylglucosamine pyrophosphorylase 1
421	chr1	170174922	170174923	2	*	1.56515e-08	0.342818	0.00323313	0.339585	Promoter (<=1kb)	chr1	170141223	170174964	33742	-	107652	uc007dlw.2	41	ENSMUSG00000026670	Uap1	UDP-N-acetylglucosamine pyrophosphorylase 1
422	chr1	170174933	170174934	2	*	1.57672e-09	3.62025e-05	0.00536259	-0.00532639	Promoter (<=1kb)	chr1	170141223	170174964	33742	-	107652	uc007dlw.2	30	ENSMUSG00000026670	Uap1	UDP-N-acetylglucosamine pyrophosphorylase 1
423	chr1	170174938	170174938	1	*	1.20974e-06	0.323789	0.00607955	0.317709	Promoter (<=1kb)	chr1	170141223	170174964	33742	-	107652	uc007dlw.2	26	ENSMUSG00000026670	Uap1	UDP-N-acetylglucosamine pyrophosphorylase 1
424	chr1	170174939	170175021	83	*	6.11885e-06	0.000218525	0.0158392	-0.0156207	Promoter (<=1kb)	chr1	170141223	170174964	33742	-	107652	uc007dlw.2	0	ENSMUSG00000026670	Uap1	UDP-N-acetylglucosamine pyrophosphorylase 1
425	chr1	170885120	170885120	1	*	6.16885e-12	0.000788331	0.344673	-0.343885	Promoter (<=1kb)	chr1	170874188	170885540	11353	-	80915	uc007dml.1	420	ENSMUSG00000026659	Dusp12	dual specificity phosphatase 12
426	chr1	170885219	170885274	56	*	9.29851e-06	0.000873446	2.43828e-05	0.000849168	Promoter (<=1kb)	chr1	170874188	170885540	11353	-	80915	uc007dml.1	266	ENSMUSG00000026659	Dusp12	dual specificity phosphatase 12
427	chr1	171044742	171044789	48	*	1.50729e-10	0.0195545	0.000128523	0.019426	Distal Intergenic	chr1	171051169	171058052	6884	-	14131	uc007dmy.2	13263	ENSMUSG00000059498	Fcgr3	Fc receptor, IgG, low affinity III
428	chr1	171102752	171102757	6	*	0.00159169	0.00292716	0.024466	-0.0215389	Exon (uc033fnt.1/uc033fnt.1, exon 1 of 1)	chr1	171121661	171126967	5307	+	75472	uc007dna.1	-18909	ENSMUSG00000026649	Cfap126	cilia and flagella associated protein 126
429	chr1	171150571	171150624	54	*	1.17707e-10	0.336526	0.00112174	0.335405	Promoter (<=1kb)	chr1	171129157	171150603	21447	-	66052	uc007dnb.2	0	ENSMUSG00000058076	Sdhc	succinate dehydrogenase complex, subunit C, integral membrane protein
430	chr1	171222187	171222255	69	*	0.000107769	0.00710169	0.244649	-0.237547	Promoter (<=1kb)	chr1	171217803	171222184	4382	-	641376	uc007dni.1	-3	ENSMUSG00000005674	Tomm40l	translocase of outer mitochondrial membrane 40 homolog-like (yeast)
431	chr1	171294471	171294484	14	*	4.32489e-07	3.35238e-05	0.00460189	-0.00456837	Promoter (<=1kb)	chr1	171288564	171294982	6419	-	66155	uc007dnw.1	498	ENSMUSG00000062963	Ufc1	ubiquitin-fold modifier conjugating enzyme 1
432	chr1	171294747	171294751	5	*	0.000855742	0.00110875	0.0422969	-0.0411881	Promoter (<=1kb)	chr1	171288564	171294982	6419	-	66155	uc007dnw.1	231	ENSMUSG00000062963	Ufc1	ubiquitin-fold modifier conjugating enzyme 1
433	chr1	171294921	171295010	90	*	0.000768068	0.0203327	0.000710239	0.0196941	Promoter (<=1kb)	chr1	171288564	171294982	6419	-	66155	uc007dnw.1	0	ENSMUSG00000062963	Ufc1	ubiquitin-fold modifier conjugating enzyme 1
434	chr1	171329401	171329448	48	*	9.79377e-07	2.39873e-05	0.00154075	-0.00151732	Promoter (<=1kb)	chr1	171329145	171342501	13357	+	21945	uc007dnx.2	303	ENSMUSG00000013973	Dedd	death effector domain-containing
435	chr1	171411475	171411704	230	*	8.53795e-05	0.285819	0.00855725	0.273879	Promoter (<=1kb)	chr1	171411681	171418759	7079	+	22278	uc007dol.2	0	ENSMUSG00000026641	Usf1	upstream transcription factor 1
436	chr1	171437972	171438009	38	*	4.05034e-06	0.00398966	4.91001e-05	0.00394056	Promoter (<=1kb)	chr1	171437561	171464593	27033	+	16456	uc007doo.1	448	ENSMUSG00000038235	F11r	F11 receptor
437	chr1	172023643	172023643	1	*	0.000204544	0.63344	0.815268	-0.181828	Intron (uc007dpi.1/93840, intron 7 of 7)	chr1	172004371	172028045	23675	-	93840	uc007dpi.1	4402	ENSMUSG00000026556	Vangl2	vang-like 2 (van gogh, Drosophila)
438	chr1	172026668	172026668	1	*	0.00502071	0.00320979	0.0615064	-0.0582966	Promoter (1-2kb)	chr1	172004371	172028045	23675	-	93840	uc007dpi.1	1377	ENSMUSG00000026556	Vangl2	vang-like 2 (van gogh, Drosophila)
439	chr1	172027146	172027465	320	*	2.78658e-07	3.6011e-05	0.00252535	-0.00248925	Promoter (<=1kb)	chr1	172004371	172028045	23675	-	93840	uc007dpi.1	580	ENSMUSG00000026556	Vangl2	vang-like 2 (van gogh, Drosophila)
440	chr1	172148228	172148276	49	*	0.00100505	0.0139809	0.24889	-0.234883	Promoter (<=1kb)	chr1	172148178	172196393	48216	+	98193	uc007dpx.2	98	ENSMUSG00000026554	Dcaf8	DDB1 and CUL4 associated factor 8
441	chr1	172206315	172206319	5	*	6.94603e-09	0.3362	0.0021747	0.334025	Promoter (<=1kb)	chr1	172196729	172206781	10053	-	18611	uc007dpy.1	462	ENSMUSG00000013698	Pea15a	phosphoprotein enriched in astrocytes 15A
442	chr1	172206359	172206362	4	*	2.35131e-06	2.45015e-05	0.00120493	-0.00118042	Promoter (<=1kb)	chr1	172196729	172206781	10053	-	18611	uc007dpy.1	419	ENSMUSG00000013698	Pea15a	phosphoprotein enriched in astrocytes 15A
443	chr1	172376601	172376819	219	*	1.14269e-06	0.00559347	0.336966	-0.33243	Promoter (<=1kb)	chr1	172376531	172384099	7569	+	67556	uc007dqk.2	288	ENSMUSG00000050229	Pigm	phosphatidylinositol glycan anchor biosynthesis, class M
444	chr1	172392495	172392495	1	*	0.00201656	0.073215	0.13431	-0.0610947	Distal Intergenic	chr1	172376531	172384099	7569	+	67556	uc007dqk.2	15964	ENSMUSG00000050229	Pigm	phosphatidylinositol glycan anchor biosynthesis, class M
445	chr1	172632552	172632552	1	*	4.86443e-06	0.00108534	2.45694e-05	0.00106077	Promoter (<=1kb)	chr1	172630769	172632974	2206	-	68440	uc007dqw.1	422	ENSMUSG00000026544	Dusp23	dual specificity phosphatase 23
446	chr1	172632558	172632558	1	*	6.45003e-10	0.00142873	0.343635	-0.342206	Promoter (<=1kb)	chr1	172630769	172632974	2206	-	68440	uc007dqw.1	416	ENSMUSG00000026544	Dusp23	dual specificity phosphatase 23
447	chr1	172632583	172632583	1	*	2.38422e-06	0.00186534	2.77554e-05	0.00183759	Promoter (<=1kb)	chr1	172630769	172632974	2206	-	68440	uc007dqw.1	391	ENSMUSG00000026544	Dusp23	dual specificity phosphatase 23
448	chr1	172632584	172632584	1	*	4.16814e-09	0.00186975	0.34039	-0.33852	Promoter (<=1kb)	chr1	172630769	172632974	2206	-	68440	uc007dqw.1	390	ENSMUSG00000026544	Dusp23	dual specificity phosphatase 23
449	chr1	172632591	172632591	1	*	0.000179794	0.00345632	8.88468e-05	0.00336748	Promoter (<=1kb)	chr1	172630769	172632974	2206	-	68440	uc007dqw.1	383	ENSMUSG00000026544	Dusp23	dual specificity phosphatase 23
450	chr1	172632592	172632624	33	*	1.02539e-08	0.00213848	0.337801	-0.335663	Promoter (<=1kb)	chr1	172630769	172632974	2206	-	68440	uc007dqw.1	350	ENSMUSG00000026544	Dusp23	dual specificity phosphatase 23
451	chr1	172632930	172632930	1	*	0.000116047	0.00952876	0.258169	-0.24864	Promoter (<=1kb)	chr1	172630769	172632974	2206	-	68440	uc007dqw.1	44	ENSMUSG00000026544	Dusp23	dual specificity phosphatase 23
452	chr1	174502861	174502885	25	*	4.64458e-06	0.0842771	0.0381317	0.0462279	Promoter (1-2kb)	chr1	174501825	174822729	320905	+	54418	uc007dtd.2	1060	ENSMUSG00000028354	Fmn2	formin 2
453	chr1	175625292	175625557	266	*	4.56687e-10	5.72019e-05	0.00281093	-0.00275373	Promoter (<=1kb)	chr1	175601378	175625635	24258	-	14194	uc007dtn.2	78	ENSMUSG00000026526	Fh1	fumarate hydratase 1
454	chr1	175625614	175625636	23	*	7.14907e-10	0.339696	0.00157808	0.338035	Promoter (<=1kb)	chr1	175601378	175625635	24258	-	14194	uc007dtn.2	0	ENSMUSG00000026526	Fh1	fumarate hydratase 1
455	chr1	175692158	175692200	43	*	7.80037e-06	0.344299	0.00590007	0.338398	Promoter (<=1kb)	chr1	175662421	175692632	30212	-	13603	uc007dtq.2	432	ENSMUSG00000026525	Opn3	opsin 3
456	chr1	176813433	176813463	31	*	3.7939e-05	0.00499297	7.29349e-05	0.00492004	Promoter (1-2kb)	chr1	176814660	176845497	30838	+	76816	uc007duh.2	-1227	ENSMUSG00000026504	Sdccag8	serologically defined colon cancer antigen 8
457	chr1	176813749	176813749	1	*	0.00089416	0.000127497	0.00295439	-0.00282689	Promoter (<=1kb)	chr1	176814660	176845497	30838	+	76816	uc007duh.2	-911	ENSMUSG00000026504	Sdccag8	serologically defined colon cancer antigen 8
458	chr1	176813752	176813793	42	*	1.56644e-10	0.344069	0.0011403	0.342921	Promoter (<=1kb)	chr1	176814660	176845497	30838	+	76816	uc007duh.2	-908	ENSMUSG00000026504	Sdccag8	serologically defined colon cancer antigen 8
459	chr1	176813804	176813828	25	*	3.07659e-05	2.3781e-05	0.000556797	-0.000533016	Promoter (<=1kb)	chr1	176814660	176845497	30838	+	76816	uc007duh.2	-856	ENSMUSG00000026504	Sdccag8	serologically defined colon cancer antigen 8
460	chr1	177442066	177442132	67	*	0.000134417	0.0112008	0.283427	-0.272226	Promoter (<=1kb)	chr1	177442407	177450764	8358	+	30928	uc007dul.2	-341	ENSMUSG00000063659	Zbtb18	zinc finger and BTB domain containing 18
461	chr1	177442231	177442241	11	*	0.000924804	0.162838	0.00599319	0.156844	Promoter (<=1kb)	chr1	177442407	177450764	8358	+	30928	uc007dul.2	-176	ENSMUSG00000063659	Zbtb18	zinc finger and BTB domain containing 18
462	chr1	177442335	177442343	9	*	1.23229e-06	2.97095e-05	0.0014257	-0.00139599	Promoter (<=1kb)	chr1	177442407	177450764	8358	+	30928	uc007dul.2	-72	ENSMUSG00000063659	Zbtb18	zinc finger and BTB domain containing 18
463	chr1	177442465	177442648	184	*	0.000108744	0.00300531	0.0625587	-0.0588726	Promoter (<=1kb)	chr1	177442407	177450764	8358	+	30928	uc007dul.2	241	ENSMUSG00000063659	Zbtb18	zinc finger and BTB domain containing 18
464	chr1	177983564	177983609	46	*	1.73169e-09	0.32907	0.00153198	0.327538	Promoter (<=1kb)	chr1	177983423	178149962	166540	+	545391	uc011wxj.1	186	ENSMUSG00000091476	Gm16432	predicted gene 16432
465	chr1	178187946	178187990	45	*	5.55214e-10	0.333079	0.0016287	0.33145	Promoter (<=1kb)	chr1	178187417	178252597	65181	+	78825	uc007dux.1	573	ENSMUSG00000026502	Desi2	desumoylating isopeptidase 2
466	chr1	178337735	178337737	3	*	0.00261085	0.00310927	0.0376873	-0.034578	Promoter (<=1kb)	chr1	178322166	178337784	15619	-	51810	uc007dvb.2	47	ENSMUSG00000039630	Hnrnpu	heterogeneous nuclear ribonucleoprotein U
467	chr1	178337861	178338011	151	*	5.78945e-07	0.332374	0.00544236	0.328472	Promoter (<=1kb)	chr1	178322166	178337784	15619	-	51810	uc007dvb.2	-77	ENSMUSG00000039630	Hnrnpu	heterogeneous nuclear ribonucleoprotein U
468	chr1	179546794	179546833	40	*	1.69329e-15	0.000241791	0.344984	-0.344728	Promoter (<=1kb)	chr1	179546529	179582936	36408	+	226744	uc007dvm.1	304	ENSMUSG00000038949	Cnst	consortin, connexin sorting protein
469	chr1	179668553	179668644	92	*	5.11932e-08	6.55513e-05	0.010905	-0.0108379	Promoter (<=1kb)	chr1	179668231	179687184	18954	+	109232	uc007dvp.1	413	ENSMUSG00000038936	Sccpdh	saccharopine dehydrogenase (putative)
470	chr1	179668653	179668653	1	*	8.00364e-15	0.346393	0.000266011	0.346127	Promoter (<=1kb)	chr1	179668231	179687184	18954	+	109232	uc007dvp.1	422	ENSMUSG00000038936	Sccpdh	saccharopine dehydrogenase (putative)
471	chr1	179847930	179847930	1	*	3.7683e-08	0.00334917	2.80388e-05	0.00332113	Distal Intergenic	chr1	179744904	179804015	59112	-	226747	uc011wxn.1	-43915	ENSMUSG00000026491	Ahctf1	AT hook containing transcription factor 1
472	chr1	179959786	179959799	14	*	2.53333e-05	0.01574	0.000946622	0.0147895	Promoter (1-2kb)	chr1	179961089	180101272	140184	+	226751	uc007dvs.2	-1303	ENSMUSG00000026490	Cdc42bpa	CDC42 binding protein kinase alpha
473	chr1	179959841	179959936	96	*	6.61324e-09	0.00245815	0.34415	-0.340012	Promoter (1-2kb)	chr1	179961089	180101272	140184	+	226751	uc007dvs.2	-1248	ENSMUSG00000026490	Cdc42bpa	CDC42 binding protein kinase alpha
474	chr1	180003215	180003215	1	*	0.0013397	0.967646	0.745926	0.22172	Intron (uc007dvs.2/226751, intron 2 of 14)	chr1	179961089	180101272	140184	+	226751	uc007dvs.2	42126	ENSMUSG00000026490	Cdc42bpa	CDC42 binding protein kinase alpha
475	chr1	180256116	180256121	6	*	8.91855e-05	0.000412768	2.49536e-05	0.000387814	Promoter (<=1kb)	chr1	180227004	180256300	29297	-	19165	uc007dwd.2	179	ENSMUSG00000010609	Psen2	presenilin 2
476	chr1	180256124	180256135	12	*	3.44698e-11	0.00081365	0.338981	-0.338167	Promoter (<=1kb)	chr1	180227004	180256300	29297	-	19165	uc007dwd.2	165	ENSMUSG00000010609	Psen2	presenilin 2
477	chr1	180256144	180256144	1	*	1.93764e-05	0.00141381	3.77075e-05	0.00137611	Promoter (<=1kb)	chr1	180227004	180256300	29297	-	19165	uc007dwd.2	156	ENSMUSG00000010609	Psen2	presenilin 2
478	chr1	180256188	180256209	22	*	1.51527e-06	0.00520436	0.29312	-0.288045	Promoter (<=1kb)	chr1	180227004	180256300	29297	-	19165	uc007dwd.2	91	ENSMUSG00000010609	Psen2	presenilin 2
479	chr1	180256373	180256373	1	*	7.92467e-06	0.000143609	0.010348	-0.0102044	Promoter (<=1kb)	chr1	180227004	180256300	29297	-	19165	uc007dwd.2	-73	ENSMUSG00000010609	Psen2	presenilin 2
480	chr1	180812608	180812621	14	*	2.24407e-11	0.325713	0.000872929	0.32484	Promoter (<=1kb)	chr1	180802568	180813603	11036	-	15078	uc007dwr.1	982	ENSMUSG00000060743	H3f3a	H3 histone, family 3A
481	chr1	180813862	180813868	7	*	3.37741e-08	2.301e-05	0.00137907	-0.00135606	Promoter (<=1kb)	chr1	180802568	180813603	11036	-	15078	uc007dwr.1	-259	ENSMUSG00000060743	H3f3a	H3 histone, family 3A
482	chr1	180814038	180814176	139	*	2.64867e-06	2.60245e-05	0.00165241	-0.00162385	Promoter (<=1kb)	chr1	180802568	180813603	11036	-	15078	uc007dwr.1	-435	ENSMUSG00000060743	H3f3a	H3 histone, family 3A
483	chr1	180814183	180814197	15	*	7.61182e-08	0.33863	0.0036085	0.335022	Promoter (<=1kb)	chr1	180802568	180813603	11036	-	15078	uc007dwr.1	-580	ENSMUSG00000060743	H3f3a	H3 histone, family 3A
484	chr1	180814210	180814220	11	*	7.81585e-07	4.93075e-05	0.00449476	-0.00444546	Promoter (<=1kb)	chr1	180802568	180813603	11036	-	15078	uc007dwr.1	-607	ENSMUSG00000060743	H3f3a	H3 histone, family 3A
485	chr1	180814235	180814235	1	*	1.95247e-06	0.297981	0.00457184	0.293409	Promoter (<=1kb)	chr1	180802568	180813603	11036	-	15078	uc007dwr.1	-632	ENSMUSG00000060743	H3f3a	H3 histone, family 3A
486	chr1	180814239	180814239	1	*	1.06278e-05	7.79915e-05	0.0046084	-0.00453041	Promoter (<=1kb)	chr1	180802568	180813603	11036	-	15078	uc007dwr.1	-636	ENSMUSG00000060743	H3f3a	H3 histone, family 3A
487	chr1	180814253	180814254	2	*	1.00463e-05	0.276057	0.00534136	0.270715	Promoter (<=1kb)	chr1	180802568	180813603	11036	-	15078	uc007dwr.1	-650	ENSMUSG00000060743	H3f3a	H3 histone, family 3A
488	chr1	180814274	180814274	1	*	5.03462e-06	5.0347e-05	0.00298172	-0.00293137	Promoter (<=1kb)	chr1	180802568	180813603	11036	-	15078	uc007dwr.1	-671	ENSMUSG00000060743	H3f3a	H3 histone, family 3A
489	chr1	180814275	180814275	1	*	7.4206e-08	0.317964	0.00278813	0.315176	Promoter (<=1kb)	chr1	180802568	180813603	11036	-	15078	uc007dwr.1	-672	ENSMUSG00000060743	H3f3a	H3 histone, family 3A
490	chr1	180814284	180814303	20	*	8.04012e-06	4.32832e-05	0.00302676	-0.00298371	Promoter (<=1kb)	chr1	180802568	180813603	11036	-	15078	uc007dwr.1	-681	ENSMUSG00000060743	H3f3a	H3 histone, family 3A
491	chr1	180814318	180814318	1	*	1.90679e-06	0.321144	0.004834	0.31631	Promoter (<=1kb)	chr1	180802568	180813603	11036	-	15078	uc007dwr.1	-715	ENSMUSG00000060743	H3f3a	H3 histone, family 3A
492	chr1	180942501	180942532	32	*	1.8234e-08	0.00351185	0.345094	-0.341582	Promoter (<=1kb)	chr1	180942518	180975104	32587	+	208795	uc007dwx.1	0	ENSMUSG00000026519	Tmem63a	transmembrane protein 63a
493	chr1	180942535	180942537	3	*	0.000207959	0.00429239	0.000101163	0.00419123	Promoter (<=1kb)	chr1	180942518	180975104	32587	+	208795	uc007dwx.1	19	ENSMUSG00000026519	Tmem63a	transmembrane protein 63a
494	chr1	180942539	180942539	1	*	6.70733e-10	0.00184028	0.347178	-0.345337	Promoter (<=1kb)	chr1	180942518	180975104	32587	+	208795	uc007dwx.1	21	ENSMUSG00000026519	Tmem63a	transmembrane protein 63a
495	chr1	180942541	180942541	1	*	2.04381e-08	0.00182914	2.31016e-05	0.00180604	Promoter (<=1kb)	chr1	180942518	180975104	32587	+	208795	uc007dwx.1	23	ENSMUSG00000026519	Tmem63a	transmembrane protein 63a
496	chr1	180942544	180942544	1	*	6.16844e-10	0.00181775	0.347205	-0.345388	Promoter (<=1kb)	chr1	180942518	180975104	32587	+	208795	uc007dwx.1	26	ENSMUSG00000026519	Tmem63a	transmembrane protein 63a
497	chr1	180942546	180942546	1	*	2.13198e-08	0.00181387	2.30851e-05	0.00179078	Promoter (<=1kb)	chr1	180942518	180975104	32587	+	208795	uc007dwx.1	28	ENSMUSG00000026519	Tmem63a	transmembrane protein 63a
498	chr1	180942549	180942555	7	*	6.16917e-10	0.00182183	0.347249	-0.345427	Promoter (<=1kb)	chr1	180942518	180975104	32587	+	208795	uc007dwx.1	37	ENSMUSG00000026519	Tmem63a	transmembrane protein 63a
499	chr1	181144047	181144062	16	*	0.00269568	0.171835	0.00271975	0.169115	Promoter (<=1kb)	chr1	181093423	181144157	50735	-	67459	uc007dxb.1	95	ENSMUSG00000026516	Nvl	nuclear VCP-like
500	chr1	181210823	181210863	41	*	1.62372e-08	0.323527	0.00210737	0.32142	Promoter (1-2kb)	chr1	181173226	181211978	38753	-	226757	uc007dxf.2	1115	ENSMUSG00000038733	Wdr26	WD repeat domain 26
501	chr1	181352540	181352627	88	*	0.000120949	0.233328	0.00748878	0.225839	Promoter (<=1kb)	chr1	181352628	181460641	108014	+	72978	uc007dxh.2	-88	ENSMUSG00000026514	Cnih3	cornichon homolog 3 (Drosophila)
502	chr1	181353677	181353730	54	*	0.000350609	0.0273617	0.182987	-0.156039	Promoter (1-2kb)	chr1	181352628	181460641	108014	+	72978	uc007dxh.2	1102	ENSMUSG00000026514	Cnih3	cornichon homolog 3 (Drosophila)
503	chr1	182124860	182124887	28	*	1.34393e-10	0.345896	0.00164051	0.344256	Promoter (<=1kb)	chr1	182124737	182132415	7679	+	27058	uc007dxu.2	150	ENSMUSG00000026511	Srp9	signal recognition particle 9
504	chr1	182124962	182125064	103	*	1.85961e-08	3.78752e-05	0.00328747	-0.00325031	Promoter (<=1kb)	chr1	182124737	182132415	7679	+	27058	uc007dxu.2	327	ENSMUSG00000026511	Srp9	signal recognition particle 9
505	chr1	182408728	182408798	71	*	1.64062e-07	0.00570835	0.336587	-0.331508	Promoter (<=1kb)	chr1	182409167	182462436	53270	+	209456	uc007dyc.1	-439	ENSMUSG00000026510	Trp53bp2	transformation related protein 53 binding protein 2
506	chr1	182763932	182763994	63	*	3.7821e-07	0.295445	0.00349511	0.29195	Promoter (<=1kb)	chr1	182764906	182895654	130749	+	96935	uc007dyk.1	-974	ENSMUSG00000038576	Susd4	sushi domain containing 4
507	chr1	183369253	183369301	49	*	3.80535e-14	0.346809	0.000361072	0.346448	Promoter (<=1kb)	chr1	183326236	183369565	43330	-	338366	uc008icw.1	264	#N/A	Mia3	melanoma inhibitory activity 3
508	chr1	183369388	183369516	129	*	2.40627e-06	0.00706494	0.335692	-0.32924	Promoter (<=1kb)	chr1	183326236	183369565	43330	-	338366	uc008icw.1	49	#N/A	Mia3	melanoma inhibitory activity 3
509	chr1	184033583	184033583	1	*	9.12991e-08	2.31716e-05	0.00121767	-0.0011945	Promoter (<=1kb)	chr1	184033032	184033998	967	-	73363	uc011wxw.1	415	ENSMUSG00000044854	1700056E22Rik	RIKEN cDNA 1700056E22 gene
510	chr1	184033895	184034011	117	*	3.46562e-12	0.00964395	4.01719e-05	0.00960378	Promoter (<=1kb)	chr1	184033032	184033998	967	-	73363	uc011wxw.1	0	ENSMUSG00000044854	1700056E22Rik	RIKEN cDNA 1700056E22 gene
511	chr1	184732881	184732898	18	*	0.00010642	0.301976	0.00843264	0.293543	Promoter (<=1kb)	chr1	184727145	184732493	5349	-	15284	uc007dyn.2	-388	ENSMUSG00000039377	Hlx	H2.0-like homeobox
512	chr1	184732904	184732904	1	*	3.09465e-05	0.000140494	0.0100813	-0.00994085	Promoter (<=1kb)	chr1	184727145	184732493	5349	-	15284	uc007dyn.2	-411	ENSMUSG00000039377	Hlx	H2.0-like homeobox
513	chr1	185329016	185329055	40	*	1.38029e-06	0.00205625	0.288956	-0.284518	Promoter (<=1kb)	chr1	185286662	185329401	42740	-	381314	uc007dyz.1	346	ENSMUSG00000026618	Iars2	isoleucine-tRNA synthetase 2, mitochondrial
514	chr1	185329238	185329258	21	*	9.01737e-09	0.00294834	0.343454	-0.340506	Promoter (<=1kb)	chr1	185286662	185329401	42740	-	381314	uc007dyz.1	143	ENSMUSG00000026618	Iars2	isoleucine-tRNA synthetase 2, mitochondrial
515	chr1	185332109	185332207	99	*	1.77758e-06	0.0235869	0.00028139	0.0233055	Promoter (<=1kb)	chr1	185332159	185357769	25611	+	23827	uc007dzc.1	0	ENSMUSG00000026617	Bpnt1	bisphosphate 3'-nucleotidase 1
516	chr1	186705529	186705557	29	*	0.000106384	5.1737e-05	0.00178384	-0.0017321	Promoter (<=1kb)	chr1	186623186	186705992	82807	-	21808	uc007dzo.2	435	ENSMUSG00000039239	Tgfb2	transforming growth factor, beta 2
517	chr1	186925571	186925628	58	*	1.59114e-07	0.0483835	0.000288289	0.0480952	Distal Intergenic	chr1	186967416	186970627	3212	+	110957	uc007dzs.1	-41845	ENSMUSG00000039224	D1Pas1	DNA segment, Chr 1, Pasteur Institute 1
518	chr1	187215737	187215800	64	*	6.0666e-08	2.62148e-05	0.00234494	-0.00231864	Promoter (<=1kb)	chr1	187215511	187234339	18829	+	67769	uc007dzx.2	289	ENSMUSG00000039210	Gpatch2	G patch domain containing 2
519	chr1	187651871	187651914	44	*	4.95862e-06	0.00363747	0.312819	-0.309182	Intron (uc007eaa.2/26381, intron 1 of 7)	chr1	187609006	188214884	605879	+	26381	uc007eaa.2	42908	ENSMUSG00000026610	Esrrg	estrogen-related receptor gamma
520	chr1	188060731	188060743	13	*	0.000355137	0.695502	0.451206	0.243428	Intron (uc007eaa.2/26381, intron 3 of 7)	chr1	188006576	188008990	2415	-	320272	uc007eac.1	-51741	ENSMUSG00000103577	9330162B11Rik	RIKEN cDNA 9330162B11 gene
521	chr1	189728552	189728566	15	*	0.00160535	0.00683555	0.000479511	0.00635604	Promoter (<=1kb)	chr1	189728268	189840609	112342	+	19250	uc007eas.1	298	ENSMUSG00000026604	Ptpn14	protein tyrosine phosphatase, non-receptor type 14
522	chr1	189728628	189728632	5	*	0.00640824	0.026449	0.22215	-0.195701	Promoter (<=1kb)	chr1	189728268	189840609	112342	+	19250	uc007eas.1	364	ENSMUSG00000026604	Ptpn14	protein tyrosine phosphatase, non-receptor type 14
523	chr1	189922248	189922258	11	*	1.32201e-06	0.0213148	0.000171942	0.0211428	Promoter (<=1kb)	chr1	189880492	189922288	41797	-	226830	uc007eax.1	30	ENSMUSG00000026603	Smyd2	SET and MYND domain containing 2
524	chr1	189922261	189922263	3	*	8.99421e-05	0.0136197	0.322878	-0.309259	Promoter (<=1kb)	chr1	189880492	189922288	41797	-	226830	uc007eax.1	25	ENSMUSG00000026603	Smyd2	SET and MYND domain containing 2
525	chr1	189922270	189922270	1	*	2.07743e-09	0.0132025	4.58385e-05	0.0131567	Promoter (<=1kb)	chr1	189880492	189922288	41797	-	226830	uc007eax.1	18	ENSMUSG00000026603	Smyd2	SET and MYND domain containing 2
526	chr1	189922273	189922498	226	*	5.99271e-08	0.00415395	0.333239	-0.329056	Promoter (<=1kb)	chr1	189880492	189922288	41797	-	226830	uc007eax.1	0	ENSMUSG00000026603	Smyd2	SET and MYND domain containing 2
527	chr1	190928809	190928813	5	*	9.11442e-06	0.328013	0.00892209	0.319091	Promoter (<=1kb)	chr1	190928853	190938435	9583	+	52477	uc007ebp.1	-44	ENSMUSG00000026634	Angel2	angel homolog 2 (Drosophila)
528	chr1	190928855	190928943	89	*	1.08929e-10	3.8237e-05	0.0204259	-0.0203884	Promoter (<=1kb)	chr1	190928855	190946491	17637	+	52477	uc007ebq.2	0	ENSMUSG00000026634	Angel2	angel homolog 2 (Drosophila)
529	chr1	191025990	191026005	16	*	1.70471e-07	0.00484165	0.334684	-0.329456	Promoter (<=1kb)	chr1	191005832	191026190	20359	-	226844	uc007ebv.1	185	ENSMUSG00000066595	Mfsd7b	major facilitator superfamily domain containing 7B
530	chr1	191026233	191026263	31	*	6.68639e-08	0.0285916	0.000174629	0.0284172	Promoter (<=1kb)	chr1	191005832	191026190	20359	-	226844	uc007ebv.1	-43	ENSMUSG00000066595	Mfsd7b	major facilitator superfamily domain containing 7B
531	chr1	191063043	191063076	34	*	1.40668e-05	0.0105894	0.320242	-0.309653	Promoter (<=1kb)	chr1	191063021	191076939	13919	+	381318	uc007eca.2	55	ENSMUSG00000062510	Nsl1	NSL1, MIND kinetochore complex component, homolog (S. cerevisiae)
532	chr1	191183448	191183464	17	*	0.000525515	7.33041e-05	0.0018133	-0.00174	Promoter (<=1kb)	chr1	191170297	191183333	13037	-	11910	uc007ece.1	-115	ENSMUSG00000026628	Atf3	activating transcription factor 3
533	chr1	191183467	191183469	3	*	0.000541554	0.143961	0.00379526	0.140166	Promoter (<=1kb)	chr1	191170297	191183333	13037	-	11910	uc007ece.1	-134	ENSMUSG00000026628	Atf3	activating transcription factor 3
534	chr1	191183506	191183540	35	*	0.000209618	7.04766e-05	0.00173048	-0.00166	Promoter (<=1kb)	chr1	191170297	191183333	13037	-	11910	uc007ece.1	-173	ENSMUSG00000026628	Atf3	activating transcription factor 3
535	chr1	191317817	191317817	1	*	5.14892e-06	0.0663341	0.000738345	0.0655957	Promoter (<=1kb)	chr1	191306797	191318118	11322	-	66208	uc007ecg.1	301	ENSMUSG00000037499	Nenf	neuron derived neurotrophic factor
536	chr1	191317935	191317968	34	*	2.85448e-10	2.61529e-05	0.00503889	-0.00501273	Promoter (<=1kb)	chr1	191306797	191318118	11322	-	66208	uc007ecg.1	150	ENSMUSG00000037499	Nenf	neuron derived neurotrophic factor
537	chr1	191325878	191325890	13	*	8.63102e-05	0.00836856	0.275007	-0.266639	Promoter (<=1kb)	chr1	191325965	191352925	26961	+	66950	uc007ech.1	-87	ENSMUSG00000026627	Tmem206	transmembrane protein 206
538	chr1	191326147	191326198	52	*	1.17028e-10	0.00140256	0.344225	-0.342885	Promoter (<=1kb)	chr1	191325965	191352925	26961	+	66950	uc007ech.1	233	ENSMUSG00000026627	Tmem206	transmembrane protein 206
539	chr1	191396555	191396572	18	*	9.50778e-08	0.00239671	2.70301e-05	0.00236968	Promoter (<=1kb)	chr1	191351981	191397041	45061	-	226849	uc007eci.1	469	ENSMUSG00000026626	Ppp2r5a	protein phosphatase 2, regulatory subunit B', alpha
540	chr1	191396815	191396820	6	*	0.000180067	0.0108519	0.000315572	0.0105364	Promoter (<=1kb)	chr1	191351981	191397041	45061	-	226849	uc007eci.1	221	ENSMUSG00000026626	Ppp2r5a	protein phosphatase 2, regulatory subunit B', alpha
541	chr1	191397030	191397146	117	*	2.70673e-07	0.338539	0.00496718	0.333484	Promoter (<=1kb)	chr1	191351981	191397041	45061	-	226849	uc007eci.1	0	ENSMUSG00000026626	Ppp2r5a	protein phosphatase 2, regulatory subunit B', alpha
542	chr1	192136689	192136689	1	*	0.00204901	0.185699	0.0130361	0.172663	Promoter (<=1kb)	chr1	192136898	192151025	14128	+	100038712	uc007edm.1	-209	ENSMUSG00000097316	Gm10516	predicted gene 10516
543	chr1	192137023	192137041	19	*	1.75067e-10	0.00126736	0.340113	-0.338848	Promoter (<=1kb)	chr1	192136898	192151025	14128	+	100038712	uc007edm.1	143	ENSMUSG00000097316	Gm10516	predicted gene 10516
544	chr1	192137701	192137853	153	*	1.48874e-08	0.339044	0.00272284	0.337811	Promoter (<=1kb)	chr1	192098546	192138040	39495	-	214742	uc007edh.2	187	ENSMUSG00000037395	Rcor3	REST corepressor 3
545	chr1	192138006	192138006	1	*	8.61825e-05	4.94354e-05	0.00160002	-0.00155059	Promoter (<=1kb)	chr1	192098546	192138040	39495	-	214742	uc007edh.2	34	ENSMUSG00000037395	Rcor3	REST corepressor 3
546	chr1	192138011	192138011	1	*	0.00553295	0.0984692	0.00482303	0.0936462	Promoter (<=1kb)	chr1	192098546	192138040	39495	-	214742	uc007edh.2	29	ENSMUSG00000037395	Rcor3	REST corepressor 3
547	chr1	192138269	192138295	27	*	6.76234e-07	0.320471	0.00414069	0.316149	Promoter (<=1kb)	chr1	192098546	192138040	39495	-	214742	uc007edh.2	-229	ENSMUSG00000037395	Rcor3	REST corepressor 3
548	chr1	192138639	192138639	1	*	0.0103975	0.0202073	0.198741	-0.178533	Promoter (<=1kb)	chr1	192098546	192138040	39495	-	214742	uc007edh.2	-599	ENSMUSG00000037395	Rcor3	REST corepressor 3
549	chr1	192770582	192770698	117	*	2.31739e-09	0.00149656	0.330408	-0.328912	Promoter (<=1kb)	chr1	192512828	192771219	258392	-	226861	uc007edp.2	521	ENSMUSG00000037375	Hhat	hedgehog acyltransferase
550	chr1	192854994	192855054	61	*	1.36831e-06	0.0136352	0.000222377	0.0134129	Promoter (<=1kb)	chr1	192844488	192855752	11265	-	214791	uc007eds.2	698	ENSMUSG00000016262	Sertad4	SERTA domain containing 4
551	chr1	192855120	192855178	59	*	2.41545e-13	0.000507122	0.34424	-0.343733	Promoter (<=1kb)	chr1	192844488	192855752	11265	-	214791	uc007eds.2	574	ENSMUSG00000016262	Sertad4	SERTA domain containing 4
552	chr1	192855464	192855569	106	*	8.2628e-13	0.345132	0.000587859	0.344449	Promoter (<=1kb)	chr1	192844488	192855752	11265	-	214791	uc007eds.2	183	ENSMUSG00000016262	Sertad4	SERTA domain containing 4
553	chr1	192855804	192855826	23	*	7.25959e-12	0.000759849	0.346255	-0.345495	Promoter (<=1kb)	chr1	192844488	192855752	11265	-	214791	uc007eds.2	-52	ENSMUSG00000016262	Sertad4	SERTA domain containing 4
554	chr1	193153056	193153116	61	*	0.000414871	0.0236381	0.0861475	-0.0626998	Promoter (<=1kb)	chr1	193153112	193166868	13757	+	54139	uc007edx.1	0	ENSMUSG00000026638	Irf6	interferon regulatory factor 6
555	chr10	3366477	3366477	1	*	4.85969e-13	0.000486108	0.347712	-0.347226	Promoter (<=1kb)	chr10	3366150	3464975	98826	+	76142	uc007ehq.1	327	ENSMUSG00000040653	Ppp1r14c	protein phosphatase 1, regulatory (inhibitor) subunit 14c
556	chr10	3367088	3367095	8	*	0.0015137	0.180054	0.00927617	0.170778	Promoter (<=1kb)	chr10	3366150	3464975	98826	+	76142	uc007ehq.1	945	ENSMUSG00000040653	Ppp1r14c	protein phosphatase 1, regulatory (inhibitor) subunit 14c
557	chr10	3973701	3973706	6	*	1.72644e-05	0.00532839	0.000141302	0.0051563	Promoter (<=1kb)	chr10	3973075	4156130	183056	+	270685	uc007ehj.2	631	ENSMUSG00000040675	Mthfd1l	methylenetetrahydrofolate dehydrogenase (NADP+ dependent) 1-like
558	chr10	4386673	4386753	81	*	1.51246e-07	4.24162e-05	0.00409257	-0.00405015	Promoter (<=1kb)	chr10	4367074	4387462	20389	-	381990	uc007ehg.2	709	ENSMUSG00000075327	Zbtb2	zinc finger and BTB domain containing 2
559	chr10	4387195	4387209	15	*	2.87638e-05	0.0118672	0.33452	-0.322653	Promoter (<=1kb)	chr10	4367074	4387462	20389	-	381990	uc007ehg.2	253	ENSMUSG00000075327	Zbtb2	zinc finger and BTB domain containing 2
560	chr10	4387281	4387469	189	*	1.11838e-10	0.345196	0.00117838	0.343915	Promoter (<=1kb)	chr10	4367074	4387462	20389	-	381990	uc007ehg.2	0	ENSMUSG00000075327	Zbtb2	zinc finger and BTB domain containing 2
561	chr10	4387895	4387939	45	*	8.9284e-08	0.00434707	0.342597	-0.337943	Promoter (<=1kb)	chr10	4367074	4388108	21035	-	381990	uc007ehf.2	169	ENSMUSG00000075327	Zbtb2	zinc finger and BTB domain containing 2
562	chr10	4388077	4388098	22	*	2.13564e-10	0.346156	0.00148216	0.344674	Promoter (<=1kb)	chr10	4367074	4388108	21035	-	381990	uc007ehf.2	10	ENSMUSG00000075327	Zbtb2	zinc finger and BTB domain containing 2
563	chr10	5922306	5922441	136	*	2.1474e-05	8.88507e-05	0.00388902	-0.00379443	Promoter (<=1kb)	chr10	5825664	5922400	96737	-	56533	uc007egg.2	0	ENSMUSG00000019775	Rgs17	regulator of G-protein signaling 17
564	chr10	7211801	7211816	16	*	0.000852741	0.00608174	0.0738131	-0.0677663	Promoter (<=1kb)	chr10	7119062	7212237	93176	-	215748	uc007efb.1	421	ENSMUSG00000015202	Cnksr3	Cnksr family member 3
565	chr10	7589796	7590027	232	*	4.34985e-09	0.325999	0.00198362	0.321397	Promoter (<=1kb)	chr10	7589800	7608639	18840	+	237253	uc007ehv.2	0	ENSMUSG00000019796	Lrp11	low density lipoprotein receptor-related protein 11
566	chr10	7663098	7663293	196	*	2.75841e-07	0.00429514	0.335974	-0.333073	Promoter (<=1kb)	chr10	7663371	7664623	1253	+	320642	uc007eib.2	-273	#N/A	A630066F11Rik	RIKEN cDNA A630066F11 gene
567	chr10	7681061	7681105	45	*	0.000113427	0.278209	0.0096269	0.268587	Promoter (<=1kb)	chr10	7678971	7681158	2188	-	407824	uc007eie.2	53	#N/A	BC020402	cDNA sequence BC020402
568	chr10	7681277	7681287	11	*	9.07033e-06	0.0462094	0.000316987	0.0458924	Promoter (<=1kb)	chr10	7681209	7716461	35253	+	16798	uc007eig.2	78	ENSMUSG00000040021	Lats1	large tumor suppressor
569	chr10	7955539	7955539	1	*	0.00406946	0.00207942	0.0398324	-0.037753	Promoter (<=1kb)	chr10	7905648	7956123	50476	-	68652	uc007eir.2	584	ENSMUSG00000015755	Tab2	TGF-beta activated kinase 1/MAP3K7 binding protein 2
570	chr10	7955618	7955701	84	*	4.88702e-08	0.00157878	2.40072e-05	0.00155374	Promoter (<=1kb)	chr10	7905648	7956123	50476	-	68652	uc007eir.2	422	ENSMUSG00000015755	Tab2	TGF-beta activated kinase 1/MAP3K7 binding protein 2
571	chr10	7956114	7956163	50	*	4.2241e-06	0.0013071	3.46849e-05	0.00127241	Promoter (<=1kb)	chr10	7905648	7956123	50476	-	68652	uc007eir.2	0	ENSMUSG00000015755	Tab2	TGF-beta activated kinase 1/MAP3K7 binding protein 2
572	chr10	8885829	8885829	1	*	0.00371647	0.0152009	0.209553	-0.194353	Promoter (<=1kb)	chr10	8722219	8886070	163852	-	70097	uc007eiu.1	241	ENSMUSG00000015305	Sash1	SAM and SH3 domain containing 1
573	chr10	8885925	8885934	10	*	0.000104077	0.126928	0.00348466	0.123444	Promoter (<=1kb)	chr10	8722219	8886070	163852	-	70097	uc007eiu.1	136	ENSMUSG00000015305	Sash1	SAM and SH3 domain containing 1
574	chr10	8886168	8886198	31	*	1.03826e-06	0.0069236	5.86726e-05	0.00687058	Promoter (<=1kb)	chr10	8722219	8886070	163852	-	70097	uc007eiu.1	-98	ENSMUSG00000015305	Sash1	SAM and SH3 domain containing 1
575	chr10	9901095	9901103	9	*	7.78985e-05	4.7267e-05	0.00141964	-0.00137238	Promoter (<=1kb)	chr10	9755547	9901040	145494	-	78808	uc007eiz.2	-55	ENSMUSG00000019790	Stxbp5	syntaxin binding protein 5 (tomosyn)
576	chr10	12548790	12548790	1	*	7.45581e-05	0.286158	0.0102196	0.275939	Intron (uc007ejw.1/22288, intron 24 of 73)	chr10	12385518	12614891	229374	-	22288	uc007ejx.1	66101	ENSMUSG00000019820	Utrn	utrophin
577	chr10	12869123	12869138	16	*	1.76572e-05	0.0202892	0.000368008	0.0200235	Promoter (<=1kb)	chr10	12720819	12869365	148547	-	22288	uc007eke.1	227	ENSMUSG00000019820	Utrn	utrophin
578	chr10	12869288	12869302	15	*	5.18082e-06	0.00927958	0.336063	-0.326784	Promoter (<=1kb)	chr10	12720819	12869365	148547	-	22288	uc007eke.1	63	ENSMUSG00000019820	Utrn	utrophin
579	chr10	13964702	13964771	70	*	2.5557e-08	0.00353874	0.343224	-0.339683	Promoter (1-2kb)	chr10	13966077	14151378	185302	+	15273	uc007elg.1	-1375	ENSMUSG00000015501	Hivep2	human immunodeficiency virus type I enhancer binding protein 2
580	chr10	13965181	13965257	77	*	0.000183669	0.0483325	0.000608016	0.0477245	Promoter (<=1kb)	chr10	13966077	14151378	185302	+	15273	uc007elg.1	-896	ENSMUSG00000015501	Hivep2	human immunodeficiency virus type I enhancer binding protein 2
581	chr10	13965585	13965615	31	*	5.33172e-05	0.285798	0.0109266	0.274871	Promoter (<=1kb)	chr10	13966077	14151378	185302	+	15273	uc007elg.1	-492	ENSMUSG00000015501	Hivep2	human immunodeficiency virus type I enhancer binding protein 2
582	chr10	13966109	13966122	14	*	0.000174995	0.0157531	0.000304865	0.0154482	Promoter (<=1kb)	chr10	13966077	14151378	185302	+	15273	uc007elg.1	45	ENSMUSG00000015501	Hivep2	human immunodeficiency virus type I enhancer binding protein 2
583	chr10	14705282	14705365	84	*	1.71504e-06	0.340754	0.00898747	0.332488	Promoter (<=1kb)	chr10	14655333	14705489	50157	-	66201	uc007ell.1	124	ENSMUSG00000019868	Vta1	Vps20-associated 1 homolog (S. cerevisiae)
584	chr10	17722960	17723134	175	*	7.65991e-16	0.000255473	0.346563	-0.346109	Promoter (<=1kb)	chr10	17723228	17725674	2447	+	17684	uc007elt.2	-268	ENSMUSG00000039910	Cited2	Cbp/p300-interacting transactivator, with Glu/Asp-rich carboxy-terminal domain, 2
585	chr10	17723613	17723615	3	*	0.00102994	2.40356e-05	0.000205934	-0.000181898	Promoter (<=1kb)	chr10	17723421	17725674	2254	+	17684	uc007elu.2	194	ENSMUSG00000039910	Cited2	Cbp/p300-interacting transactivator, with Glu/Asp-rich carboxy-terminal domain, 2
586	chr10	17723679	17723756	78	*	2.33973e-10	0.0163969	3.95486e-05	0.0163563	Promoter (<=1kb)	chr10	17723421	17725674	2254	+	17684	uc007elu.2	335	ENSMUSG00000039910	Cited2	Cbp/p300-interacting transactivator, with Glu/Asp-rich carboxy-terminal domain, 2
587	chr10	18022727	18022912	186	*	2.02802e-06	0.0015033	2.5359e-05	0.00147792	Promoter (<=1kb)	chr10	18011260	18023252	11993	-	73112	uc007ely.2	340	ENSMUSG00000078453	Abracl	ABRA C-terminal like
588	chr10	18055636	18055644	9	*	3.16659e-12	0.000644476	0.346431	-0.345787	Promoter (<=1kb)	chr10	18055940	18125155	69216	+	19707	uc007ema.2	-304	ENSMUSG00000019854	Reps1	RalBP1 associated Eps domain containing protein
589	chr10	18056059	18056248	190	*	1.37049e-05	0.30265	0.00136903	0.293459	Promoter (<=1kb)	chr10	18055940	18125155	69216	+	19707	uc007ema.2	308	ENSMUSG00000019854	Reps1	RalBP1 associated Eps domain containing protein
590	chr10	18431039	18431063	25	*	0.000267043	0.0104006	0.000403983	0.0099966	Intron (uc007emh.1/215819, intron 1 of 3)	chr10	18407675	18512510	104836	+	215819	uc007emh.1	23388	ENSMUSG00000039835	Nhsl1	NHS-like 1
591	chr10	18743765	18743792	28	*	1.57449e-12	0.000494916	0.341132	-0.340637	Promoter (<=1kb)	chr10	18588011	18743758	155748	-	215821	uc007emn.1	-7	ENSMUSG00000019852	Arfgef3	ARFGEF family member 3
592	chr10	18844922	18844961	40	*	4.83833e-08	0.322577	0.00273272	0.319844	Promoter (<=1kb)	chr10	18845071	18857072	12002	+	64058	uc007emz.1	-149	ENSMUSG00000019851	Perp	PERP, TP53 apoptosis effector
593	chr10	19357170	19357170	1	*	0.000317093	0.000454437	0.0259263	-0.0254719	Promoter (<=1kb)	chr10	19356539	19358604	2066	+	94222	uc007ene.1	631	ENSMUSG00000045591	Olig3	oligodendrocyte transcription factor 3
594	chr10	19592209	19592283	75	*	2.94315e-05	0.283675	0.0117368	0.272998	Promoter (<=1kb)	chr10	19591958	19610225	18268	+	15979	uc007eng.1	325	ENSMUSG00000020009	Ifngr1	interferon gamma receptor 1
595	chr10	19934129	19934179	51	*	2.84553e-12	0.3378	0.000574545	0.337225	Promoter (<=1kb)	chr10	19934526	20142750	208225	+	26408	uc007enm.2	-397	ENSMUSG00000071369	Map3k5	mitogen-activated protein kinase kinase kinase 5
596	chr10	19934655	19934770	116	*	2.9841e-05	0.00673883	0.277636	-0.270897	Promoter (<=1kb)	chr10	19934526	20142750	208225	+	26408	uc007enm.2	244	ENSMUSG00000071369	Map3k5	mitogen-activated protein kinase kinase kinase 5
597	chr10	20312302	20312395	94	*	2.46784e-05	0.0127305	0.326878	-0.314148	Promoter (<=1kb)	chr10	20312469	20342501	30033	+	72567	uc007ent.1	-167	ENSMUSG00000037608	Bclaf1	BCL2-associated transcription factor 1
598	chr10	20312849	20312926	78	*	4.37137e-06	2.35909e-05	0.000958647	-0.000935056	Promoter (<=1kb)	chr10	20312469	20342501	30033	+	72567	uc007ent.1	457	ENSMUSG00000037608	Bclaf1	BCL2-associated transcription factor 1
599	chr10	20347786	20347794	9	*	1.3746e-05	4.5575e-05	0.0027637	-0.00271812	Promoter (<=1kb)	chr10	20347819	20361669	13851	+	71804	uc007eny.2	-33	ENSMUSG00000019992	Mtfr2	mitochondrial fission regulator 2
600	chr10	20347902	20347905	4	*	0.00113865	0.191977	0.00128579	0.190691	Promoter (<=1kb)	chr10	20347819	20361669	13851	+	71804	uc007eny.2	86	ENSMUSG00000019992	Mtfr2	mitochondrial fission regulator 2
601	chr10	22149026	22149091	66	*	5.65665e-09	0.00222083	0.324166	-0.322078	Promoter (<=1kb)	chr10	22113050	22149270	36221	-	319887	uc029qwb.1	179	ENSMUSG00000097327	E030030I06Rik	RIKEN cDNA E030030I06 gene
602	chr10	25296791	25296819	29	*	6.47491e-10	0.00179649	0.344559	-0.342762	Promoter (2-3kb)	chr10	25169090	25299163	130074	-	432442	uc007eri.1	2344	ENSMUSG00000039166	Akap7	A kinase (PRKA) anchor protein 7
603	chr10	25297007	25297048	42	*	2.77787e-06	2.29677e-05	0.000648395	-0.000625428	Promoter (2-3kb)	chr10	25169090	25299163	130074	-	432442	uc007eri.1	2115	ENSMUSG00000039166	Akap7	A kinase (PRKA) anchor protein 7
604	chr10	25359901	25359901	1	*	0.00127575	0.000306508	0.0108939	-0.0105874	Promoter (<=1kb)	chr10	25359798	25523518	163721	+	13822	uc007erk.2	103	ENSMUSG00000019978	Epb41l2	erythrocyte membrane protein band 4.1 like 2
605	chr10	25360080	25360104	25	*	5.40165e-06	0.000174266	0.010332	-0.0101578	Promoter (<=1kb)	chr10	25359798	25523518	163721	+	13822	uc007erk.2	306	ENSMUSG00000019978	Epb41l2	erythrocyte membrane protein band 4.1 like 2
606	chr10	26374015	26374068	54	*	5.5472e-12	2.91661e-05	0.00874735	-0.00871844	Promoter (<=1kb)	chr10	26275452	26373956	98505	-	237339	uc007esa.1	-59	ENSMUSG00000039089	L3mbtl3	l(3)mbt-like 3 (Drosophila)
607	chr10	26374185	26374185	1	*	9.59643e-07	0.00581999	0.330208	-0.324388	Promoter (<=1kb)	chr10	26275452	26373956	98505	-	237339	uc007esa.1	-229	ENSMUSG00000039089	L3mbtl3	l(3)mbt-like 3 (Drosophila)
608	chr10	26374367	26374426	60	*	9.93334e-08	2.34219e-05	0.000654335	-0.000630913	Promoter (<=1kb)	chr10	26275452	26373956	98505	-	237339	uc007esa.1	-411	ENSMUSG00000039089	L3mbtl3	l(3)mbt-like 3 (Drosophila)
609	chr10	26772469	26772477	9	*	0.000101305	0.000171711	0.00550498	-0.00533327	Promoter (<=1kb)	chr10	26772512	26918648	146137	+	73910	uc007ese.1	-43	ENSMUSG00000039031	Arhgap18	Rho GTPase activating protein 18
610	chr10	29147502	29147535	34	*	3.33823e-07	0.0025415	0.269989	-0.267447	Exon (uc007est.1/67412, exon 2 of 7)	chr10	29143996	29199628	55633	+	67412	uc007est.1	3539	ENSMUSG00000038916	Soga3	SOGA family member 3
611	chr10	29313356	29313361	6	*	7.78704e-08	0.00114649	2.3e-05	0.00112349	Promoter (<=1kb)	chr10	29313500	29346661	33162	+	52665	uc007esx.2	-144	ENSMUSG00000019883	Echdc1	enoyl Coenzyme A hydratase domain containing 1
612	chr10	29361854	29361881	28	*	2.12331e-12	0.000536934	0.343519	-0.342955	Promoter (<=1kb)	chr10	29344176	29362442	18267	-	68031	uc007esy.2	561	ENSMUSG00000038876	Rnf146	ring finger protein 146
613	chr10	30802638	30802665	28	*	1.5069e-09	0.33595	0.00149642	0.334454	Promoter (<=1kb)	chr10	30645582	30803107	157526	-	211329	uc007etl.2	442	ENSMUSG00000039697	Ncoa7	nuclear receptor coactivator 7
614	chr10	30802739	30802821	83	*	1.62447e-10	0.00103688	0.330415	-0.329378	Promoter (<=1kb)	chr10	30645582	30803107	157526	-	211329	uc007etl.2	286	ENSMUSG00000039697	Ncoa7	nuclear receptor coactivator 7
615	chr10	30842965	30842965	1	*	3.85908e-11	0.00106784	0.344993	-0.343925	Promoter (<=1kb)	chr10	30832359	30842783	10425	-	15214	uc007etp.1	-182	ENSMUSG00000019789	Hey2	hairy/enhancer-of-split related with YRPW motif 2
616	chr10	30842972	30842984	13	*	2.55937e-07	0.00180382	2.77481e-05	0.00177607	Promoter (<=1kb)	chr10	30832359	30842783	10425	-	15214	uc007etp.1	-189	ENSMUSG00000019789	Hey2	hairy/enhancer-of-split related with YRPW motif 2
617	chr10	30842998	30842998	1	*	6.35849e-08	0.00317626	0.329885	-0.326709	Promoter (<=1kb)	chr10	30832359	30842783	10425	-	15214	uc007etp.1	-215	ENSMUSG00000019789	Hey2	hairy/enhancer-of-split related with YRPW motif 2
618	chr10	30843000	30843013	14	*	5.48435e-07	0.00380745	4.37578e-05	0.00376369	Promoter (<=1kb)	chr10	30832359	30842783	10425	-	15214	uc007etp.1	-217	ENSMUSG00000019789	Hey2	hairy/enhancer-of-split related with YRPW motif 2
619	chr10	30843039	30843039	1	*	9.82122e-06	0.0060805	0.290302	-0.284221	Promoter (<=1kb)	chr10	30832359	30842783	10425	-	15214	uc007etp.1	-256	ENSMUSG00000019789	Hey2	hairy/enhancer-of-split related with YRPW motif 2
620	chr10	30843042	30843045	4	*	4.63566e-06	0.00606225	8.19364e-05	0.00598032	Promoter (<=1kb)	chr10	30832359	30842783	10425	-	15214	uc007etp.1	-259	ENSMUSG00000019789	Hey2	hairy/enhancer-of-split related with YRPW motif 2
621	chr10	30843051	30843055	5	*	8.95418e-06	0.00615314	0.294465	-0.288311	Promoter (<=1kb)	chr10	30832359	30842783	10425	-	15214	uc007etp.1	-268	ENSMUSG00000019789	Hey2	hairy/enhancer-of-split related with YRPW motif 2
622	chr10	30843061	30843061	1	*	2.09863e-06	0.0057568	6.85843e-05	0.00568822	Promoter (<=1kb)	chr10	30832359	30842783	10425	-	15214	uc007etp.1	-278	ENSMUSG00000019789	Hey2	hairy/enhancer-of-split related with YRPW motif 2
623	chr10	30843063	30843069	7	*	3.62551e-06	0.00548987	0.304294	-0.298805	Promoter (<=1kb)	chr10	30832359	30842783	10425	-	15214	uc007etp.1	-280	ENSMUSG00000019789	Hey2	hairy/enhancer-of-split related with YRPW motif 2
624	chr10	30843078	30843082	5	*	7.671e-07	0.00481911	5.2007e-05	0.00476711	Promoter (<=1kb)	chr10	30832359	30842783	10425	-	15214	uc007etp.1	-295	ENSMUSG00000019789	Hey2	hairy/enhancer-of-split related with YRPW motif 2
625	chr10	30843087	30843087	1	*	6.49477e-07	0.00443645	0.319856	-0.315419	Promoter (<=1kb)	chr10	30832359	30842783	10425	-	15214	uc007etp.1	-304	ENSMUSG00000019789	Hey2	hairy/enhancer-of-split related with YRPW motif 2
626	chr10	31608947	31608964	18	*	1.79994e-10	0.0016233	0.34213	-0.340507	Promoter (<=1kb)	chr10	31501887	31609725	107839	-	268291	uc007etu.2	761	ENSMUSG00000063760	Rnf217	ring finger protein 217
627	chr10	33995628	33995635	8	*	0.000849768	0.80642	0.924848	-0.118428	Promoter (<=1kb)	chr10	33987216	33995055	7840	-	414093	uc011xco.2	-573	#N/A	A830082N09Rik	RIKEN cDNA A830082N09 gene
628	chr10	34282278	34282291	14	*	0.000691751	0.228476	0.00385375	0.224623	Promoter (<=1kb)	chr10	34282190	34284885	2696	+	22110	uc007eut.2	101	ENSMUSG00000047514	Tspyl1	testis-specific protein, Y-encoded-like 1
629	chr10	36974252	36974401	150	*	7.93365e-07	0.334424	0.00594249	0.328348	Promoter (<=1kb)	chr10	36974544	36996111	21568	+	15182	uc007eve.1	-292	ENSMUSG00000019777	Hdac2	histone deacetylase 2
630	chr10	36974523	36974602	80	*	7.3168e-09	0.345276	0.00287998	0.342391	Promoter (<=1kb)	chr10	36974544	36996111	21568	+	15182	uc007eve.1	0	ENSMUSG00000019777	Hdac2	histone deacetylase 2
631	chr10	37138982	37139050	69	*	1.31528e-06	0.284618	0.00340096	0.280352	Promoter (<=1kb)	chr10	37133243	37138926	5684	-	17118	uc007evg.1	-56	ENSMUSG00000069662	Marcks	myristoylated alanine rich protein kinase C substrate
632	chr10	39369861	39369932	72	*	6.14415e-08	4.50868e-05	0.00691015	-0.00686411	Promoter (<=1kb)	chr10	39369799	39565374	195576	+	14360	uc007evx.2	133	ENSMUSG00000019843	Fyn	Fyn proto-oncogene
633	chr10	39616399	39616399	1	*	0.000788109	0.236884	0.376317	-0.139433	Intron (uc007ewa.1/103213, intron 1 of 8)	chr10	39612934	39655307	42374	+	103213	uc007ewa.1	3465	ENSMUSG00000019842	Traf3ip2	TRAF3 interacting protein 2
634	chr10	39731974	39732037	64	*	1.62366e-09	0.334636	0.00228719	0.332349	Promoter (<=1kb)	chr10	39621411	39732007	110597	-	327744	uc007ewb.2	0	ENSMUSG00000087177	E130307A14Rik	RIKEN cDNA E130307A14 gene
635	chr10	40300933	40301068	136	*	1.12371e-05	0.000974873	2.52154e-05	0.000949657	Promoter (1-2kb)	chr10	40287458	40302188	14731	-	11702	uc007ews.3	1120	ENSMUSG00000075232	Amd1	S-adenosylmethionine decarboxylase 1
636	chr10	40349524	40349613	90	*	2.22762e-08	0.332487	0.00244265	0.330052	Promoter (<=1kb)	chr10	40349308	40483818	134511	+	78334	uc007ewu.2	305	ENSMUSG00000038481	Cdk19	cyclin-dependent kinase 19
637	chr10	40713424	40713444	21	*	2.75645e-06	0.0655328	0.144139	-0.0786062	Intron (uc007exd.1/327747, intron 1 of 4)	chr10	40683282	40811083	127802	+	327747	uc007exd.1	30162	ENSMUSG00000045555	Mettl24	methyltransferase like 24
638	chr10	41809800	41810002	203	*	2.84236e-06	0.299136	0.000744012	0.293324	Promoter (<=1kb)	chr10	41718840	41809868	91029	-	103268	uc011xdc.2	0	ENSMUSG00000019813	Cep57l1	centrosomal protein 57-like 1
639	chr10	41810274	41810413	140	*	6.09782e-10	0.00143353	0.342746	-0.341248	Promoter (<=1kb)	chr10	41810574	41908436	97863	+	140742	uc007eye.2	-300	ENSMUSG00000038332	Sesn1	sestrin 1
640	chr10	42018081	42018128	48	*	3.74325e-06	0.000215455	0.0182274	-0.018012	Promoter (<=1kb)	chr10	41914990	42018382	103393	-	213402	uc007eyh.3	254	ENSMUSG00000071324	Armc2	armadillo repeat containing 2
641	chr10	42277438	42277508	71	*	4.70673e-06	2.79378e-05	0.00143557	-0.0014076	Promoter (<=1kb)	chr10	42185786	42276742	90957	-	56484	uc007eyl.1	-696	ENSMUSG00000048756	Foxo3	forkhead box O3
642	chr10	42591819	42591904	86	*	2.95701e-05	0.00743113	0.273362	-0.265095	Distal Intergenic	chr10	42561971	42583588	21618	-	21907	uc007eyt.1	-8231	ENSMUSG00000019803	Nr2e1	nuclear receptor subfamily 2, group E, member 1
643	chr10	42762069	42762117	49	*	4.16796e-07	0.00461314	0.336798	-0.332184	Promoter (<=1kb)	chr10	42761496	42832514	71019	+	140740	uc007eyx.2	621	ENSMUSG00000019802	Sec63	SEC63-like (S. cerevisiae)
644	chr10	43174015	43174023	9	*	7.76359e-05	0.00366696	9.7142e-05	0.00356982	Promoter (<=1kb)	chr10	43002500	43174530	172031	-	109205	uc007ezf.1	507	ENSMUSG00000038248	Sobp	sine oculis-binding protein homolog (Drosophila)
645	chr10	43174325	43174328	4	*	5.48491e-08	2.42857e-05	0.00227839	-0.00225411	Promoter (<=1kb)	chr10	43002500	43174530	172031	-	109205	uc007ezf.1	202	ENSMUSG00000038248	Sobp	sine oculis-binding protein homolog (Drosophila)
646	chr10	43174437	43174597	161	*	2.05852e-12	0.000619097	0.345737	-0.345118	Promoter (<=1kb)	chr10	43002500	43174530	172031	-	109205	uc007ezf.1	0	ENSMUSG00000038248	Sobp	sine oculis-binding protein homolog (Drosophila)
647	chr10	43174836	43174837	2	*	0.00236433	0.000519208	0.00734116	-0.00682196	Promoter (<=1kb)	chr10	43174699	43176565	1867	+	74530	uc011xdj.2	138	ENSMUSG00000045008	9030612E09Rik	RIKEN cDNA 9030612E09 gene
648	chr10	43901628	43901628	1	*	1.35934e-12	0.34666	0.000598466	0.346061	Promoter (<=1kb)	chr10	43874190	43901736	27547	-	76563	uc007ezn.1	108	ENSMUSG00000019863	Qrsl1	glutaminyl-tRNA synthase (glutamine-hydrolyzing)-like 1
649	chr10	44148996	44149020	25	*	5.31141e-07	3.89733e-05	0.00364347	-0.00360449	Distal Intergenic	chr10	44170447	44219585	49139	+	70365	uc007ezs.2	-21451	#N/A	Speer5-ps1	spermatogenesis associated glutamate (E)-rich protein 5, pseudogene 1
650	chr10	44458562	44458635	74	*	6.31255e-10	0.00126542	0.33305	-0.331784	Promoter (<=1kb)	chr10	44437174	44458748	21575	-	12142	uc007ezu.3	113	ENSMUSG00000038151	Prdm1	PR domain containing 1, with ZNF domain
651	chr10	50894477	50894527	51	*	3.73652e-07	0.00158096	3.18019e-05	0.00154916	Promoter (1-2kb)	chr10	50895651	50989152	93502	+	20464	uc007fal.1	-1174	ENSMUSG00000019913	Sim1	single-minded homolog 1 (Drosophila)
652	chr10	52233555	52233619	65	*	4.88835e-10	0.00229447	2.54136e-05	0.00226906	Promoter (<=1kb)	chr10	52233619	52288545	54927	+	66686	uc007fbc.1	0	ENSMUSG00000019891	Dcbld1	discoidin, CUB and LCCL domain containing 1
653	chr10	52381725	52381736	12	*	0.00187319	0.000588839	0.0143833	-0.0137945	Promoter (<=1kb)	chr10	52337024	52382124	45101	-	94221	uc007fbf.2	388	ENSMUSG00000019861	Gopc	golgi associated PDZ and coiled-coil motif containing
654	chr10	52381760	52381919	160	*	5.89627e-06	0.316175	0.00649083	0.309798	Promoter (<=1kb)	chr10	52337024	52382124	45101	-	94221	uc007fbf.2	205	ENSMUSG00000019861	Gopc	golgi associated PDZ and coiled-coil motif containing
655	chr10	52417612	52417730	119	*	3.38734e-07	3.22907e-05	0.00245393	-0.00242164	Promoter (<=1kb)	chr10	52417547	52440192	22646	+	52014	uc007fbi.2	183	ENSMUSG00000023068	Nus1	nuclear undecaprenyl pyrophosphate synthase 1 homolog (S. cerevisiae)
656	chr10	52417746	52417756	11	*	3.80769e-07	0.314642	0.00347723	0.311164	Promoter (<=1kb)	chr10	52417547	52440192	22646	+	52014	uc007fbi.2	209	ENSMUSG00000023068	Nus1	nuclear undecaprenyl pyrophosphate synthase 1 homolog (S. cerevisiae)
657	chr10	52417871	52417920	50	*	1.69105e-06	0.000762187	2.483e-05	0.000737357	Promoter (<=1kb)	chr10	52417547	52440192	22646	+	52014	uc007fbi.2	373	ENSMUSG00000023068	Nus1	nuclear undecaprenyl pyrophosphate synthase 1 homolog (S. cerevisiae)
658	chr10	52418132	52418244	113	*	9.53283e-08	0.005861	4.66374e-05	0.00581437	Promoter (<=1kb)	chr10	52417547	52440192	22646	+	52014	uc007fbi.2	697	ENSMUSG00000023068	Nus1	nuclear undecaprenyl pyrophosphate synthase 1 homolog (S. cerevisiae)
659	chr10	53379393	53379452	60	*	5.6702e-10	0.343095	0.00178942	0.341292	Promoter (<=1kb)	chr10	53278081	53379851	101771	-	100038725	uc007fbn.2	399	ENSMUSG00000038594	Cep85l	centrosomal protein 85-like
660	chr10	53379628	53379628	1	*	5.98691e-15	0.000250717	0.343439	-0.343189	Promoter (<=1kb)	chr10	53278081	53379851	101771	-	100038725	uc007fbn.2	223	ENSMUSG00000038594	Cep85l	centrosomal protein 85-like
661	chr10	53379815	53379827	13	*	2.6924e-05	0.0028111	6.14519e-05	0.00274965	Promoter (<=1kb)	chr10	53278081	53379851	101771	-	100038725	uc007fbn.2	24	ENSMUSG00000038594	Cep85l	centrosomal protein 85-like
662	chr10	53597656	53597697	42	*	9.43044e-08	2.78942e-05	0.0024603	-0.00243237	Promoter (<=1kb)	chr10	53537324	53597648	60325	-	71567	uc011xdv.1	-8	ENSMUSG00000058298	Mcm9	minichromosome maintenance complex component 9
663	chr10	53597774	53597785	12	*	2.44841e-08	0.00298136	2.66236e-05	0.00295473	Promoter (<=1kb)	chr10	53537324	53597648	60325	-	71567	uc011xdv.1	-126	ENSMUSG00000058298	Mcm9	minichromosome maintenance complex component 9
664	chr10	53750988	53751008	21	*	2.74702e-08	0.335819	0.00332451	0.332495	Promoter (<=1kb)	chr10	53633145	53750909	117765	-	75906	uc007fbu.2	-79	ENSMUSG00000019856	Fam184a	family with sequence similarity 184, member A
665	chr10	58629525	58629525	1	*	0.000405944	0.300085	0.17222	0.127865	Intron (uc007fdh.2/13608, intron 10 of 11)	chr10	58600788	58675696	74909	-	13608	uc007fdh.2	46171	ENSMUSG00000003227	Edar	ectodysplasin-A receptor
666	chr10	58812373	58812453	81	*	3.88833e-15	0.0217317	4.73854e-05	0.0216878	Promoter (<=1kb)	chr10	58813359	59050020	236662	+	237353	uc007fdj.2	-986	ENSMUSG00000037990	Sh3rf3	SH3 domain containing ring finger 3
667	chr10	59539894	59539942	49	*	1.27208e-07	0.00298353	0.326039	-0.323056	Intron (uc007fdt.3/215999, intron 7 of 7)	chr10	59446984	59616692	169709	-	215999	uc007fdt.3	76750	ENSMUSG00000009647	Mcu	mitochondrial calcium uniporter
668	chr10	59616624	59616665	42	*	1.35569e-06	0.00149074	3.21717e-05	0.00145857	Promoter (<=1kb)	chr10	59446984	59616692	169709	-	215999	uc007fdt.3	27	ENSMUSG00000009647	Mcu	mitochondrial calcium uniporter
669	chr10	59702740	59702740	1	*	0.00365537	0.0546749	0.0060763	0.0485986	Promoter (<=1kb)	chr10	59702563	59744896	42334	+	216001	uc007fdv.2	177	ENSMUSG00000020111	Micu1	mitochondrial calcium uptake 1
670	chr10	59952293	59952339	47	*	3.7417e-09	0.0014508	0.311563	-0.310112	Promoter (<=1kb)	chr10	59949675	59951770	2096	-	74747	uc007fee.1	-523	ENSMUSG00000020108	Ddit4	DNA-damage-inducible transcript 4
671	chr10	59952777	59952780	4	*	0.000337766	0.000457937	0.0169616	-0.0165036	Promoter (1-2kb)	chr10	59949675	59951770	2096	-	74747	uc007fee.1	-1007	ENSMUSG00000020108	Ddit4	DNA-damage-inducible transcript 4
672	chr10	60277892	60277921	30	*	4.43168e-07	3.32616e-05	0.00470993	-0.00467667	Promoter (<=1kb)	chr10	60277628	60302600	24973	+	19156	uc007feo.2	293	ENSMUSG00000004207	Psap	prosaposin
673	chr10	60752770	60752872	103	*	3.8505e-06	2.49852e-05	0.00178177	-0.00175678	Promoter (<=1kb)	chr10	60712072	60752782	40711	-	71279	uc007ffb.1	0	ENSMUSG00000020100	Slc29a3	solute carrier family 29 (nucleoside transporters), member 3
674	chr10	60831211	60831228	18	*	2.78869e-09	0.0265914	3.42978e-05	0.0265571	Promoter (<=1kb)	chr10	60762595	60831581	68987	-	107449	uc007ffe.1	353	ENSMUSG00000020099	Unc5b	unc-5 homolog B (C. elegans)
675	chr10	60831376	60831424	49	*	8.47094e-05	2.29232e-05	0.000334383	-0.00031146	Promoter (<=1kb)	chr10	60762595	60831581	68987	-	107449	uc007ffe.1	157	ENSMUSG00000020099	Unc5b	unc-5 homolog B (C. elegans)
676	chr10	60839113	60839128	16	*	0.000681276	0.389519	0.619538	-0.230019	Distal Intergenic	chr10	60762595	60831581	68987	-	107449	uc007ffe.1	-7532	ENSMUSG00000020099	Unc5b	unc-5 homolog B (C. elegans)
677	chr10	61452347	61452347	1	*	4.58776e-06	2.47458e-05	0.00228504	-0.00226029	Promoter (<=1kb)	chr10	61432497	61452669	20173	-	13688	uc007fga.1	322	ENSMUSG00000020091	Eif4ebp2	eukaryotic translation initiation factor 4E binding protein 2
678	chr10	61452709	61452764	56	*	4.17711e-07	0.00456617	0.337479	-0.332913	Promoter (<=1kb)	chr10	61432497	61452669	20173	-	13688	uc007fga.1	-40	ENSMUSG00000020091	Eif4ebp2	eukaryotic translation initiation factor 4E binding protein 2
679	chr10	61476070	61476076	7	*	0.00103577	0.00145268	0.0438579	-0.0424053	Promoter (<=1kb)	chr10	61475833	61582228	106396	+	216011	uc007fgc.1	243	ENSMUSG00000037151	Lrrc20	leucine rich repeat containing 20
680	chr10	61649076	61649076	1	*	4.22468e-06	0.0071079	0.31929	-0.312182	Promoter (<=1kb)	chr10	61648621	61674165	25545	+	67895	uc007fge.1	455	ENSMUSG00000020089	Ppa1	pyrophosphatase (inorganic) 1
681	chr10	61649081	61649081	1	*	1.26057e-08	0.00705168	4.809e-05	0.00700359	Promoter (<=1kb)	chr10	61648621	61674165	25545	+	67895	uc007fge.1	460	ENSMUSG00000020089	Ppa1	pyrophosphatase (inorganic) 1
682	chr10	61649082	61649082	1	*	4.40863e-06	0.00706049	0.31712	-0.31006	Promoter (<=1kb)	chr10	61648621	61674165	25545	+	67895	uc007fge.1	461	ENSMUSG00000020089	Ppa1	pyrophosphatase (inorganic) 1
683	chr10	61649092	61649092	1	*	4.77398e-08	0.00761639	5.96974e-05	0.00755669	Promoter (<=1kb)	chr10	61648621	61674165	25545	+	67895	uc007fge.1	471	ENSMUSG00000020089	Ppa1	pyrophosphatase (inorganic) 1
684	chr10	61649102	61649103	2	*	4.19847e-05	0.00900569	0.287705	-0.2787	Promoter (<=1kb)	chr10	61648621	61674165	25545	+	67895	uc007fge.1	482	ENSMUSG00000020089	Ppa1	pyrophosphatase (inorganic) 1
685	chr10	61680377	61680395	19	*	0.000293613	0.000161512	0.00602005	-0.00585854	Promoter (<=1kb)	chr10	61680321	61693297	12977	+	20224	uc007fgg.1	74	ENSMUSG00000020088	Sar1a	SAR1 gene homolog A (S. cerevisiae)
686	chr10	61680529	61680544	16	*	0.00100669	0.269074	0.0172448	0.251829	Promoter (<=1kb)	chr10	61680321	61693297	12977	+	20224	uc007fgg.1	223	ENSMUSG00000020088	Sar1a	SAR1 gene homolog A (S. cerevisiae)
687	chr10	61715419	61715505	87	*	2.05419e-05	0.241974	0.00481107	0.237163	Promoter (<=1kb)	chr10	61715263	61738652	23390	+	71361	uc007fgi.2	242	ENSMUSG00000020085	Aifm2	apoptosis-inducing factor, mitochondrion-associated 2
688	chr10	61783146	61783146	1	*	2.36487e-05	0.296828	0.00893459	0.287894	Promoter (<=1kb)	chr10	61738647	61783864	45218	-	404634	uc007fgm.1	718	ENSMUSG00000020086	H2afy2	H2A histone family, member Y2
689	chr10	61783354	61783489	136	*	3.0008e-08	0.00233973	0.337813	-0.335259	Promoter (<=1kb)	chr10	61738647	61783864	45218	-	404634	uc007fgm.1	375	ENSMUSG00000020086	H2afy2	H2A histone family, member Y2
690	chr10	61783610	61783711	102	*	3.79454e-11	4.35533e-05	0.00541964	-0.00538044	Promoter (<=1kb)	chr10	61738647	61783864	45218	-	404634	uc007fgm.1	153	ENSMUSG00000020086	H2afy2	H2A histone family, member Y2
691	chr10	62449534	62449562	29	*	2.44221e-09	0.00875304	4.03562e-05	0.00871268	Promoter (<=1kb)	chr10	62429378	62449693	20316	-	338359	uc007fhd.1	131	ENSMUSG00000020079	Supv3l1	suppressor of var1, 3-like 1 (S. cerevisiae)
692	chr10	62449672	62449700	29	*	1.78222e-08	0.337976	0.00299888	0.334978	Promoter (<=1kb)	chr10	62429378	62449693	20316	-	338359	uc007fhd.1	0	ENSMUSG00000020079	Supv3l1	suppressor of var1, 3-like 1 (S. cerevisiae)
693	chr10	62449710	62449710	1	*	2.36419e-08	3.29215e-05	0.00335409	-0.00332116	Promoter (<=1kb)	chr10	62429378	62449693	20316	-	338359	uc007fhd.1	-17	ENSMUSG00000020079	Supv3l1	suppressor of var1, 3-like 1 (S. cerevisiae)
694	chr10	62449752	62449766	15	*	3.61718e-06	0.33377	0.00628795	0.327482	Promoter (<=1kb)	chr10	62429378	62449693	20316	-	338359	uc007fhd.1	-59	ENSMUSG00000020079	Supv3l1	suppressor of var1, 3-like 1 (S. cerevisiae)
695	chr10	62725737	62725782	46	*	2.43731e-08	0.00240028	0.314447	-0.312046	Promoter (<=1kb)	chr10	62659422	62726099	66678	-	216021	uc011xfe.1	317	ENSMUSG00000036923	Stox1	storkhead box 1
696	chr10	63023159	63023172	14	*	1.7039e-06	0.00264201	3.70164e-05	0.002605	Promoter (<=1kb)	chr10	63014664	63023748	9085	-	432467	uc011xfk.1	576	ENSMUSG00000020069	Hnrnph3	heterogeneous nuclear ribonucleoprotein H3
697	chr10	63023178	63023204	27	*	2.26088e-10	0.00121914	0.343933	-0.342713	Promoter (<=1kb)	chr10	63014664	63023748	9085	-	432467	uc011xfk.1	544	ENSMUSG00000020069	Hnrnph3	heterogeneous nuclear ribonucleoprotein H3
698	chr10	63023206	63023206	1	*	6.56663e-06	0.000883306	2.39189e-05	0.000859387	Promoter (<=1kb)	chr10	63014664	63023748	9085	-	432467	uc011xfk.1	542	ENSMUSG00000020069	Hnrnph3	heterogeneous nuclear ribonucleoprotein H3
699	chr10	63023729	63023729	1	*	0.000554709	2.28723e-05	2.28723e-05	-2.57498e-19	Promoter (<=1kb)	chr10	63014664	63023748	9085	-	432467	uc011xfk.1	19	ENSMUSG00000020069	Hnrnph3	heterogeneous nuclear ribonucleoprotein H3
700	chr10	67096455	67096535	81	*	9.53252e-13	0.00498826	3.36851e-05	0.00495752	Promoter (<=1kb)	chr10	67096125	67226916	130792	+	108829	uc011xfo.1	410	ENSMUSG00000037876	Jmjd1c	jumonji domain containing 1C
701	chr10	67096777	67096878	102	*	3.17752e-07	2.68616e-05	0.00162569	-0.0015987	Promoter (<=1kb)	chr10	67009189	67096988	87800	-	28193	uc007flq.2	110	ENSMUSG00000019873	Reep3	receptor accessory protein 3
702	chr10	67126682	67126752	71	*	9.38555e-08	4.18692e-05	0.00398156	-0.0039397	Promoter (<=1kb)	chr10	67127258	67256326	129069	+	108829	uc011xfp.1	-576	ENSMUSG00000037876	Jmjd1c	jumonji domain containing 1C
703	chr10	67536973	67537051	79	*	2.24869e-10	0.00123112	0.344192	-0.342961	Promoter (<=1kb)	chr10	67537869	67542188	4320	+	13654	uc007flx.1	-896	ENSMUSG00000037868	Egr2	early growth response 2
704	chr10	67548089	67548099	11	*	0.00229236	0.0157966	0.000960034	0.0148365	Promoter (<=1kb)	chr10	67544511	67548955	4445	-	211488	uc007flz.2	856	ENSMUSG00000057134	Ado	2-aminoethanethiol (cysteamine) dioxygenase
705	chr10	67548218	67548323	106	*	7.98356e-11	0.336345	0.00118013	0.335073	Promoter (<=1kb)	chr10	67544511	67548955	4445	-	211488	uc007flz.2	632	ENSMUSG00000057134	Ado	2-aminoethanethiol (cysteamine) dioxygenase
706	chr10	67548424	67548425	2	*	0.00452022	0.0961819	0.008812	0.0873699	Promoter (<=1kb)	chr10	67544511	67548955	4445	-	211488	uc007flz.2	530	ENSMUSG00000057134	Ado	2-aminoethanethiol (cysteamine) dioxygenase
707	chr10	67549012	67549092	81	*	1.40337e-09	0.340074	0.00230474	0.337661	Promoter (<=1kb)	chr10	67544511	67548955	4445	-	211488	uc007flz.2	-57	ENSMUSG00000057134	Ado	2-aminoethanethiol (cysteamine) dioxygenase
708	chr10	68136539	68136630	92	*	8.97044e-06	0.314877	0.00740716	0.30747	Promoter (<=1kb)	chr10	68095593	68136626	41034	-	71371	uc007fmf.1	0	ENSMUSG00000019947	Arid5b	AT rich interactive domain 5B (MRF1-like)
709	chr10	69352225	69352267	43	*	0.00197513	0.0339155	0.00198827	0.0318933	Promoter (<=1kb)	chr10	69336635	69352912	16278	-	12534	uc007fmr.1	645	ENSMUSG00000019942	Cdk1	cyclin-dependent kinase 1
710	chr10	69693990	69694002	13	*	0.00050379	0.955325	0.997745	-0.0424204	Intron (uc007fmt.1/11735, intron 1 of 6)	chr10	69706474	69822635	116162	+	11735	uc007fnd.1	-12484	ENSMUSG00000069601	Ank3	ankyrin 3, epithelial
711	chr10	70097842	70097881	40	*	2.10754e-11	0.343064	0.000906074	0.342158	Promoter (<=1kb)	chr10	70097121	70193200	96080	+	76551	uc011xfv.1	760	ENSMUSG00000048701	Ccdc6	coiled-coil domain containing 6
712	chr10	70098078	70098105	28	*	0.000122734	0.000792287	0.0327352	-0.0315461	Promoter (<=1kb)	chr10	70097121	70193200	96080	+	76551	uc011xfv.1	984	ENSMUSG00000048701	Ccdc6	coiled-coil domain containing 6
713	chr10	71159437	71159437	1	*	0.00062699	0.0174308	0.31501	-0.297579	Promoter (<=1kb)	chr10	70925096	71159634	234539	-	83675	uc007fog.2	197	ENSMUSG00000014329	Bicc1	bicaudal C homolog 1 (Drosophila)
714	chr10	71238022	71238130	109	*	7.97577e-08	0.0026574	2.71696e-05	0.00263023	Promoter (<=1kb)	chr10	71225477	71238044	12568	-	21780	uc007fom.1	0	ENSMUSG00000003923	Tfam	transcription factor A, mitochondrial
715	chr10	71238139	71238140	2	*	5.68965e-06	2.83259e-05	0.0014949	-0.00146657	Promoter (<=1kb)	chr10	71225477	71238044	12568	-	21780	uc007fom.1	-95	ENSMUSG00000003923	Tfam	transcription factor A, mitochondrial
716	chr10	71238151	71238151	1	*	3.93629e-07	0.274703	0.0024605	0.272242	Promoter (<=1kb)	chr10	71225477	71238044	12568	-	21780	uc007fom.1	-107	ENSMUSG00000003923	Tfam	transcription factor A, mitochondrial
717	chr10	71344858	71344984	127	*	2.01585e-06	0.000319472	0.171688	-0.171225	Promoter (<=1kb)	chr10	71330494	71344849	14356	-	52637	uc007foq.1	-9	ENSMUSG00000037710	Cisd1	CDGSH iron sulfur domain 1
718	chr10	71344993	71345006	14	*	5.21038e-10	0.344239	0.00139377	0.342845	Promoter (<=1kb)	chr10	71330494	71344849	14356	-	52637	uc007foq.1	-144	ENSMUSG00000037710	Cisd1	CDGSH iron sulfur domain 1
719	chr10	74967016	74967016	1	*	1.79598e-05	0.000740896	2.53617e-05	0.000715534	Promoter (<=1kb)	chr10	74967231	75015877	48647	+	14687	uc007fpt.1	-215	ENSMUSG00000040009	Gnaz	guanine nucleotide binding protein, alpha z subunit
720	chr10	74967020	74967024	5	*	1.91912e-11	0.000860165	0.343397	-0.342537	Promoter (<=1kb)	chr10	74967231	75015877	48647	+	14687	uc007fpt.1	-211	ENSMUSG00000040009	Gnaz	guanine nucleotide binding protein, alpha z subunit
721	chr10	74967027	74967027	1	*	0.000844302	0.00201361	9.94364e-05	0.00191418	Promoter (<=1kb)	chr10	74967231	75015877	48647	+	14687	uc007fpt.1	-204	ENSMUSG00000040009	Gnaz	guanine nucleotide binding protein, alpha z subunit
722	chr10	74967037	74967037	1	*	0.000154931	0.00258719	0.126762	-0.124175	Promoter (<=1kb)	chr10	74967231	75015877	48647	+	14687	uc007fpt.1	-194	ENSMUSG00000040009	Gnaz	guanine nucleotide binding protein, alpha z subunit
723	chr10	74967323	74967329	7	*	0.00044517	0.000459744	0.0129469	-0.0124871	Promoter (<=1kb)	chr10	74967231	75015877	48647	+	14687	uc007fpt.1	98	ENSMUSG00000040009	Gnaz	guanine nucleotide binding protein, alpha z subunit
724	chr10	74967344	74967344	1	*	0.000247072	0.3712	0.0126269	0.358573	Promoter (<=1kb)	chr10	74967231	75015877	48647	+	14687	uc007fpt.1	113	ENSMUSG00000040009	Gnaz	guanine nucleotide binding protein, alpha z subunit
725	chr10	75061101	75061118	18	*	3.17739e-08	0.0102668	3.39997e-05	0.0102328	Promoter (<=1kb)	chr10	75060896	75184923	124028	+	110279	uc007fqb.2	222	ENSMUSG00000009681	Bcr	breakpoint cluster region
726	chr10	75667499	75667535	37	*	1.1397e-06	2.55805e-05	0.00208999	-0.00206441	Promoter (<=1kb)	chr10	75646110	75667918	21809	-	104248	uc007fqu.1	383	ENSMUSG00000020196	Cabin1	calcineurin binding protein 1
727	chr10	75667732	75667749	18	*	1.83482e-05	0.000102022	0.00426882	-0.0041668	Promoter (<=1kb)	chr10	75646110	75667918	21809	-	104248	uc007fqu.1	169	ENSMUSG00000020196	Cabin1	calcineurin binding protein 1
728	chr10	75667910	75667910	1	*	0.00110436	0.0163383	0.265637	-0.249299	Promoter (<=1kb)	chr10	75646110	75667918	21809	-	104248	uc007fqu.1	8	ENSMUSG00000020196	Cabin1	calcineurin binding protein 1
729	chr10	75668169	75668218	50	*	4.68831e-05	7.29222e-05	0.00394208	-0.00386916	Promoter (<=1kb)	chr10	75656775	75668090	11316	-	104248	uc007fqy.1	-79	ENSMUSG00000020196	Cabin1	calcineurin binding protein 1
730	chr10	76032784	76032853	70	*	0.00029984	0.00945359	0.000120753	0.00933284	Promoter (<=1kb)	chr10	76032612	76042969	10358	+	64453	uc007ftw.2	241	ENSMUSG00000049764	Zfp280b	zinc finger protein 280B
731	chr10	76344822	76344833	12	*	7.7527e-05	0.000535949	0.0226584	-0.0221224	Promoter (<=1kb)	chr10	76263049	76345291	82243	-	64451	uc033fql.1	458	ENSMUSG00000020231	Dip2a	DIP2 disco-interacting protein 2 homolog A (Drosophila)
732	chr10	76345335	76345382	48	*	3.82176e-08	2.32817e-05	0.00177982	-0.00175654	Promoter (<=1kb)	chr10	76263049	76345291	82243	-	64451	uc033fql.1	-44	ENSMUSG00000020231	Dip2a	DIP2 disco-interacting protein 2 homolog A (Drosophila)
733	chr10	76531353	76531453	101	*	9.15838e-08	2.73402e-05	0.00179679	-0.00176865	Promoter (<=1kb)	chr10	76531605	76557139	25535	+	16987	uc007fuq.2	-252	ENSMUSG00000033105	Lss	lanosterol synthase
734	chr10	77032999	77033071	73	*	2.16322e-06	0.00151929	2.52105e-05	0.00149408	Promoter (<=1kb)	chr10	77033212	77050432	17221	+	20509	uc007fvd.2	-213	ENSMUSG00000001436	Slc19a1	solute carrier family 19 (folate transporter), member 1
735	chr10	77259236	77259360	125	*	2.22423e-10	0.00594842	2.8735e-05	0.00591968	Promoter (<=1kb)	chr10	77259300	77269586	10287	+	80294	uc007fvj.1	0	ENSMUSG00000020260	Pofut2	protein O-fucosyltransferase 2
736	chr10	77259603	77259613	11	*	0.000699426	0.000531328	0.0117723	-0.011241	Promoter (<=1kb)	chr10	77259300	77269586	10287	+	80294	uc007fvj.1	313	ENSMUSG00000020260	Pofut2	protein O-fucosyltransferase 2
737	chr10	77515703	77515718	16	*	4.23888e-07	0.00349897	3.44053e-05	0.00346457	Promoter (<=1kb)	chr10	77486655	77515813	29159	-	108707	uc007fvt.2	95	ENSMUSG00000032977	Fam207a	family with sequence similarity 207, member A
738	chr10	77572668	77572689	22	*	8.65029e-08	0.590753	0.272538	0.318215	Distal Intergenic	chr10	77581767	77598732	16966	+	108705	uc007fvx.1	-9099	ENSMUSG00000009291	Pttg1ip	pituitary tumor-transforming 1 interacting protein
739	chr10	77581602	77581642	41	*	7.03622e-08	0.00789055	4.19814e-05	0.00784857	Promoter (<=1kb)	chr10	77581767	77598732	16966	+	108705	uc007fvx.1	-165	ENSMUSG00000009291	Pttg1ip	pituitary tumor-transforming 1 interacting protein
740	chr10	77581978	77582021	44	*	0.0010087	0.0092397	0.191078	-0.181821	Promoter (<=1kb)	chr10	77581767	77598732	16966	+	108705	uc007fvx.1	254	ENSMUSG00000009291	Pttg1ip	pituitary tumor-transforming 1 interacting protein
741	chr10	77622200	77622217	18	*	1.14316e-06	0.31268	0.00387558	0.308805	Promoter (<=1kb)	chr10	77622321	77641578	19258	+	22213	uc011xhg.1	-121	ENSMUSG00000009293	Ube2g2	ubiquitin-conjugating enzyme E2G 2
742	chr10	77622359	77622370	12	*	1.48579e-06	0.346122	0.00683999	0.339282	Promoter (<=1kb)	chr10	77622321	77641578	19258	+	22213	uc011xhg.1	49	ENSMUSG00000009293	Ube2g2	ubiquitin-conjugating enzyme E2G 2
743	chr10	77622378	77622378	1	*	1.5543e-09	2.42327e-05	0.00621463	-0.0061904	Promoter (<=1kb)	chr10	77622321	77641578	19258	+	22213	uc011xhg.1	57	ENSMUSG00000009293	Ube2g2	ubiquitin-conjugating enzyme E2G 2
744	chr10	77622428	77622563	136	*	1.26516e-09	0.336779	0.00184798	0.335151	Promoter (<=1kb)	chr10	77622321	77641578	19258	+	22213	uc011xhg.1	242	ENSMUSG00000009293	Ube2g2	ubiquitin-conjugating enzyme E2G 2
745	chr10	77622650	77622715	66	*	8.76829e-10	0.00175849	0.329166	-0.327408	Promoter (<=1kb)	chr10	77622321	77641578	19258	+	22213	uc011xhg.1	394	ENSMUSG00000009293	Ube2g2	ubiquitin-conjugating enzyme E2G 2
746	chr10	77969776	77969807	32	*	0.000166648	0.00800102	0.225218	-0.217217	Promoter (<=1kb)	chr10	77907722	77969872	62151	-	28240	uc007fwl.2	65	ENSMUSG00000009292	Trpm2	transient receptor potential cation channel, subfamily M, member 2
747	chr10	78009359	78009464	106	*	1.67336e-10	0.339858	0.00105379	0.338804	Promoter (<=1kb)	chr10	77986949	78009796	22848	-	18641	uc007fwo.2	332	ENSMUSG00000020277	Pfkl	phosphofructokinase, liver, B-type
748	chr10	78069030	78069030	1	*	0.000139093	0.0016277	5.51955e-05	0.0015725	Promoter (<=1kb)	chr10	78069368	78075590	6223	+	50723	uc011xhs.1	-338	ENSMUSG00000000732	Icosl	icos ligand
749	chr10	78244674	78244749	76	*	3.2975e-07	0.000123216	0.0088319	-0.00870869	Promoter (<=1kb)	chr10	78186726	78244642	57917	-	216131	uc007fxm.1	-32	ENSMUSG00000000374	Trappc10	trafficking protein particle complex 10
750	chr10	78352315	78352435	121	*	7.54095e-10	0.32667	0.00162379	0.325139	Promoter (<=1kb)	chr10	78274072	78352442	78371	-	28169	uc007fxr.1	7	ENSMUSG00000001211	Agpat3	1-acylglycerol-3-phosphate O-acyltransferase 3
751	chr10	78425900	78425908	9	*	7.16062e-05	2.55742e-05	0.000543336	-0.000517762	Promoter (<=1kb)	chr10	78425670	78427622	1953	+	13014	uc007fxt.1	238	ENSMUSG00000005054	Cstb	cystatin B
752	chr10	78426035	78426035	1	*	0.00198134	0.0164846	0.000609934	0.0158747	Promoter (<=1kb)	chr10	78425670	78427622	1953	+	13014	uc007fxt.1	365	ENSMUSG00000005054	Cstb	cystatin B
753	chr10	79533571	79533684	114	*	1.4394e-08	3.88104e-05	0.00272212	-0.00268061	Promoter (<=1kb)	chr10	79526424	79533787	7364	-	50784	uc007fyq.2	103	ENSMUSG00000052151	Ppap2c	phosphatidic acid phosphatase type 2C
754	chr10	79669377	79669424	48	*	2.10885e-09	0.300664	0.00133029	0.299488	Promoter (<=1kb)	chr10	79669410	79676126	6717	+	110012	uc007fzh.1	0	ENSMUSG00000020308	Tpgs1	tubulin polyglutamylase complex subunit 1
755	chr10	79669827	79669858	32	*	7.21445e-07	3.22325e-05	0.00141194	-0.00137971	Promoter (<=1kb)	chr10	79669410	79676126	6717	+	110012	uc007fzh.1	448	ENSMUSG00000020308	Tpgs1	tubulin polyglutamylase complex subunit 1
756	chr10	79682420	79682449	30	*	0.000533179	0.00252344	0.0645699	-0.0620465	Promoter (<=1kb)	chr10	79682195	79688398	6204	+	216150	uc007fzi.1	254	ENSMUSG00000020307	Cdc34	cell division cycle 34
757	chr10	79780362	79780437	76	*	3.66931e-07	4.51416e-05	0.00856825	-0.0085167	Promoter (<=1kb)	chr10	79780581	79782630	2050	+	83554	uc007fzt.2	-219	ENSMUSG00000020325	Fstl3	follistatin-like 3
758	chr10	79793694	79793751	58	*	2.10178e-13	0.000461916	0.345595	-0.345133	Promoter (<=1kb)	chr10	79793572	79817398	23827	+	18483	uc007fzv.2	179	ENSMUSG00000035863	Palm	paralemmin
759	chr10	79908789	79908829	41	*	1.56467e-07	0.00446051	0.332344	-0.327883	Promoter (<=1kb)	chr10	79894707	79908938	14232	-	216154	uc007gak.2	109	ENSMUSG00000013833	Med16	mediator complex subunit 16
760	chr10	79926598	79926667	70	*	3.4528e-07	3.0761e-05	0.0017026	-0.00167089	Promoter (<=1kb)	chr10	79927043	79955018	27976	+	13496	uc007gap.2	-445	ENSMUSG00000019564	Arid3a	AT rich interactive domain 3A (BRIGHT-like)
761	chr10	79927002	79927019	18	*	0.00115768	0.00015082	2.29969e-05	0.000127823	Promoter (<=1kb)	chr10	79927043	79955018	27976	+	13496	uc007gap.2	-41	ENSMUSG00000019564	Arid3a	AT rich interactive domain 3A (BRIGHT-like)
762	chr10	79927234	79927234	1	*	0.00594062	0.00733945	0.119485	-0.112145	Promoter (<=1kb)	chr10	79927341	79955018	27678	+	13496	uc007gaq.2	-107	ENSMUSG00000019564	Arid3a	AT rich interactive domain 3A (BRIGHT-like)
763	chr10	79927250	79927250	1	*	0.00332274	0.00260062	0.000174673	0.00242594	Promoter (<=1kb)	chr10	79927341	79955018	27678	+	13496	uc007gaq.2	-91	ENSMUSG00000019564	Arid3a	AT rich interactive domain 3A (BRIGHT-like)
764	chr10	79927543	79927576	34	*	0.000142241	0.0153437	0.329822	-0.31456	Promoter (<=1kb)	chr10	79927341	79955018	27678	+	13496	uc007gaq.2	235	ENSMUSG00000019564	Arid3a	AT rich interactive domain 3A (BRIGHT-like)
765	chr10	79927717	79927717	1	*	0.000118259	0.000426635	0.0120544	-0.0116278	Promoter (<=1kb)	chr10	79927341	79955018	27678	+	13496	uc007gaq.2	376	ENSMUSG00000019564	Arid3a	AT rich interactive domain 3A (BRIGHT-like)
766	chr10	79983997	79984017	21	*	6.97304e-07	2.31927e-05	0.0014211	-0.00139791	Promoter (<=1kb)	chr10	79977120	79984330	7211	-	216157	uc007gax.1	313	ENSMUSG00000013858	Tmem259	transmembrane protein 259
767	chr10	79984087	79984150	64	*	1.52595e-08	0.332856	0.00225123	0.330605	Promoter (<=1kb)	chr10	79977120	79984330	7211	-	216157	uc007gax.1	180	ENSMUSG00000013858	Tmem259	transmembrane protein 259
768	chr10	80053844	80053863	20	*	5.36625e-10	0.33487	0.0012845	0.333585	Promoter (<=1kb)	chr10	80054019	80056439	2421	+	625249	uc007gbl.2	-175	ENSMUSG00000075706	Gpx4	glutathione peroxidase 4
769	chr10	80053864	80053864	1	*	1.74348e-05	3.37227e-05	0.00134615	-0.00131243	Promoter (<=1kb)	chr10	80054019	80056439	2421	+	625249	uc007gbl.2	-155	ENSMUSG00000075706	Gpx4	glutathione peroxidase 4
770	chr10	80053886	80053917	32	*	4.98246e-11	0.339773	0.000930262	0.338843	Promoter (<=1kb)	chr10	80054019	80056439	2421	+	625249	uc007gbl.2	-133	ENSMUSG00000075706	Gpx4	glutathione peroxidase 4
771	chr10	80054155	80054163	9	*	0.000145731	0.000346035	0.179115	-0.178769	Promoter (<=1kb)	chr10	80054019	80056439	2421	+	625249	uc007gbl.2	144	ENSMUSG00000075706	Gpx4	glutathione peroxidase 4
772	chr10	80115855	80115968	114	*	1.20192e-07	0.337226	0.0046681	0.332083	Promoter (<=1kb)	chr10	80115803	80130685	14883	+	20869	uc007gbt.2	165	ENSMUSG00000003068	Stk11	serine/threonine kinase 11
773	chr10	80116134	80116173	40	*	2.48985e-07	2.39316e-05	0.00112682	-0.00110288	Promoter (<=1kb)	chr10	80115803	80130685	14883	+	20869	uc007gbt.2	370	ENSMUSG00000003068	Stk11	serine/threonine kinase 11
774	chr10	80148827	80148849	23	*	0.000461871	7.15036e-05	0.00182681	-0.00175531	Promoter (<=1kb)	chr10	80148272	80158368	10097	+	59090	uc007gca.2	577	ENSMUSG00000035621	Midn	midnolin
775	chr10	80150314	80150314	1	*	4.98237e-07	2.43518e-05	0.000897059	-0.000872708	Promoter (<=1kb)	chr10	80149682	80158368	8687	+	59090	uc007gcd.2	632	ENSMUSG00000035621	Midn	midnolin
776	chr10	80150325	80150342	18	*	5.57262e-10	0.341725	0.00165621	0.340069	Promoter (<=1kb)	chr10	80149682	80158368	8687	+	59090	uc007gcd.2	660	ENSMUSG00000035621	Midn	midnolin
777	chr10	80150355	80150384	30	*	1.30618e-06	7.00248e-05	0.00590133	-0.00583131	Promoter (<=1kb)	chr10	80149682	80158368	8687	+	59090	uc007gcd.2	702	ENSMUSG00000035621	Midn	midnolin
778	chr10	80150397	80150397	1	*	8.93932e-06	0.294549	0.00643186	0.288117	Promoter (<=1kb)	chr10	80149682	80158368	8687	+	59090	uc007gcd.2	715	ENSMUSG00000035621	Midn	midnolin
779	chr10	80150399	80150404	6	*	1.66625e-06	7.82497e-05	0.00649195	-0.0064137	Promoter (<=1kb)	chr10	80149682	80158368	8687	+	59090	uc007gcd.2	722	ENSMUSG00000035621	Midn	midnolin
780	chr10	80150406	80150406	1	*	1.2207e-05	0.292232	0.00667813	0.285553	Promoter (<=1kb)	chr10	80149682	80158368	8687	+	59090	uc007gcd.2	724	ENSMUSG00000035621	Midn	midnolin
781	chr10	80150428	80150428	1	*	9.67289e-07	5.83161e-05	0.0053975	-0.00533918	Promoter (<=1kb)	chr10	80149682	80158368	8687	+	59090	uc007gcd.2	746	ENSMUSG00000035621	Midn	midnolin
782	chr10	80150681	80150712	32	*	6.15669e-07	0.00105365	2.3998e-05	0.00102965	Promoter (1-2kb)	chr10	80149682	80158368	8687	+	59090	uc007gcd.2	1030	ENSMUSG00000035621	Midn	midnolin
783	chr10	80160612	80160624	13	*	8.22716e-06	0.00028182	0.0152793	-0.0149975	Intron (uc029qzy.1/100568459, intron 1 of 1)	chr10	80167841	80171653	3813	+	12696	uc007gce.1	-7229	ENSMUSG00000045193	Cirbp	cold inducible RNA binding protein
784	chr10	80160933	80161006	74	*	5.7423e-06	0.329071	0.00824053	0.320749	Intron (uc029qzy.1/100568459, intron 1 of 1)	chr10	80167841	80171653	3813	+	12696	uc007gce.1	-6908	ENSMUSG00000045193	Cirbp	cold inducible RNA binding protein
785	chr10	80168028	80168125	98	*	3.4403e-05	0.00868387	0.295112	-0.284364	Promoter (<=1kb)	chr10	80167841	80171653	3813	+	12696	uc007gce.1	284	ENSMUSG00000045193	Cirbp	cold inducible RNA binding protein
786	chr10	80226791	80226791	1	*	2.1803e-06	0.00578926	6.53319e-05	0.00572393	Promoter (<=1kb)	chr10	80226598	80245144	18547	+	68114	uc007gch.1	193	ENSMUSG00000020156	Mum1	melanoma associated antigen (mutated) 1
787	chr10	80226793	80226793	1	*	7.55242e-06	0.00601616	0.299441	-0.293424	Promoter (<=1kb)	chr10	80226598	80245144	18547	+	68114	uc007gch.1	195	ENSMUSG00000020156	Mum1	melanoma associated antigen (mutated) 1
788	chr10	80226800	80226931	132	*	1.54133e-12	0.0145688	6.57294e-05	0.0145132	Promoter (<=1kb)	chr10	80226598	80245144	18547	+	68114	uc007gch.1	333	ENSMUSG00000020156	Mum1	melanoma associated antigen (mutated) 1
789	chr10	80265158	80265177	20	*	8.28532e-09	0.334622	0.00223952	0.332383	Promoter (<=1kb)	chr10	80264991	80288413	23423	+	70248	uc007gck.2	186	ENSMUSG00000069565	Dazap1	DAZ associated protein 1
790	chr10	80386411	80386413	3	*	5.22423e-06	2.76173e-05	0.00133631	-0.00130869	Promoter (1-2kb)	chr10	80380355	80387651	7297	-	237400	uc007gcz.1	1238	ENSMUSG00000048696	Mex3d	mex3 homolog D (C. elegans)
791	chr10	80399101	80399443	343	*	1.72085e-08	0.333782	0.00346804	0.326255	Promoter (<=1kb)	chr10	80392541	80399366	6826	-	17192	uc007gda.1	0	ENSMUSG00000035478	Mbd3	methyl-CpG binding domain protein 3
792	chr10	80433162	80433198	37	*	1.4749e-07	0.00362761	3.57844e-05	0.00359299	Promoter (<=1kb)	chr10	80409165	80433653	24489	-	21423	uc007gdf.2	455	ENSMUSG00000020167	Tcf3	transcription factor 3
793	chr10	80433385	80433434	50	*	0.000351142	2.80389e-05	0.000549021	-0.000520982	Promoter (<=1kb)	chr10	80409165	80433653	24489	-	21423	uc007gdf.2	219	ENSMUSG00000020167	Tcf3	transcription factor 3
794	chr10	80561247	80561371	125	*	2.35578e-08	0.001796	0.310463	-0.308784	Promoter (<=1kb)	chr10	80540926	80561560	20635	-	66932	uc007gds.1	189	ENSMUSG00000047417	Rexo1	REX1, RNA exonuclease 1 homolog (S. cerevisiae)
795	chr10	80576904	80576904	1	*	2.64083e-10	0.29387	0.000792544	0.293077	Promoter (<=1kb)	chr10	80567121	80577296	10176	-	118445	uc007gdt.1	392	ENSMUSG00000035397	Klf16	Kruppel-like factor 16
796	chr10	80576906	80576918	13	*	1.13704e-05	2.71735e-05	0.00133625	-0.00130908	Promoter (<=1kb)	chr10	80567121	80577296	10176	-	118445	uc007gdt.1	378	ENSMUSG00000035397	Klf16	Kruppel-like factor 16
797	chr10	80576924	80576931	8	*	1.41704e-06	0.280741	0.00355325	0.277188	Promoter (<=1kb)	chr10	80567121	80577296	10176	-	118445	uc007gdt.1	365	ENSMUSG00000035397	Klf16	Kruppel-like factor 16
798	chr10	80576936	80576936	1	*	9.26915e-08	2.83272e-05	0.00351635	-0.00348803	Promoter (<=1kb)	chr10	80567121	80577296	10176	-	118445	uc007gdt.1	360	ENSMUSG00000035397	Klf16	Kruppel-like factor 16
799	chr10	80576948	80576964	17	*	8.93094e-06	0.29158	0.00608949	0.28549	Promoter (<=1kb)	chr10	80567121	80577296	10176	-	118445	uc007gdt.1	332	ENSMUSG00000035397	Klf16	Kruppel-like factor 16
800	chr10	80577246	80577276	31	*	5.56845e-08	0.00249837	2.83558e-05	0.00247046	Promoter (<=1kb)	chr10	80567121	80577296	10176	-	118445	uc007gdt.1	20	ENSMUSG00000035397	Klf16	Kruppel-like factor 16
801	chr10	80577296	80577303	8	*	4.16973e-09	0.0018326	0.340513	-0.33868	Promoter (<=1kb)	chr10	80567121	80577296	10176	-	118445	uc007gdt.1	0	ENSMUSG00000035397	Klf16	Kruppel-like factor 16
802	chr10	80577351	80577442	92	*	5.635e-07	0.304884	0.00407211	0.300769	Promoter (<=1kb)	chr10	80567121	80577296	10176	-	118445	uc007gdt.1	-55	ENSMUSG00000035397	Klf16	Kruppel-like factor 16
803	chr10	80577518	80577520	3	*	4.40697e-12	2.3085e-05	0.0115983	-0.0115752	Promoter (<=1kb)	chr10	80567121	80577296	10176	-	118445	uc007gdt.1	-222	ENSMUSG00000035397	Klf16	Kruppel-like factor 16
804	chr10	80656109	80656109	1	*	1.48003e-12	0.000556283	0.345278	-0.344722	Promoter (<=1kb)	chr10	80642617	80657071	14455	-	208198	uc011xit.1	962	ENSMUSG00000003344	Btbd2	BTB (POZ) domain containing 2
805	chr10	80656119	80656119	1	*	3.28572e-05	0.000607634	2.45609e-05	0.000583073	Promoter (<=1kb)	chr10	80642617	80657071	14455	-	208198	uc011xit.1	952	ENSMUSG00000003344	Btbd2	BTB (POZ) domain containing 2
806	chr10	80656122	80656122	1	*	3.42705e-12	0.000626627	0.344825	-0.344198	Promoter (<=1kb)	chr10	80642617	80657071	14455	-	208198	uc011xit.1	949	ENSMUSG00000003344	Btbd2	BTB (POZ) domain containing 2
807	chr10	80656135	80656143	9	*	1.84281e-05	0.00074648	2.48029e-05	0.000721677	Promoter (<=1kb)	chr10	80642617	80657071	14455	-	208198	uc011xit.1	928	ENSMUSG00000003344	Btbd2	BTB (POZ) domain containing 2
808	chr10	80656145	80656145	1	*	2.62307e-11	0.000849862	0.34405	-0.3432	Promoter (<=1kb)	chr10	80642617	80657071	14455	-	208198	uc011xit.1	926	ENSMUSG00000003344	Btbd2	BTB (POZ) domain containing 2
809	chr10	80656150	80656150	1	*	1.42243e-05	0.000847792	2.52264e-05	0.000822565	Promoter (<=1kb)	chr10	80642617	80657071	14455	-	208198	uc011xit.1	921	ENSMUSG00000003344	Btbd2	BTB (POZ) domain containing 2
810	chr10	80656289	80656312	24	*	2.20925e-05	0.103738	0.00106672	0.102671	Promoter (<=1kb)	chr10	80642617	80657071	14455	-	208198	uc011xit.1	759	ENSMUSG00000003344	Btbd2	BTB (POZ) domain containing 2
811	chr10	80754985	80755034	50	*	3.91102e-15	0.000260326	0.34698	-0.34672	Promoter (<=1kb)	chr10	80755206	80792773	37568	+	208266	uc033frf.1	-221	ENSMUSG00000061589	Dot1l	DOT1-like, histone H3 methyltransferase (S. cerevisiae)
812	chr10	80755110	80755153	44	*	2.81686e-10	0.00664591	3.18163e-05	0.00661409	Promoter (<=1kb)	chr10	80755206	80792773	37568	+	208266	uc033frf.1	-96	ENSMUSG00000061589	Dot1l	DOT1-like, histone H3 methyltransferase (S. cerevisiae)
813	chr10	80798531	80798619	89	*	0.000429469	2.33671e-05	0.000602981	-0.000579614	Promoter (<=1kb)	chr10	80796099	80798626	2528	-	78670	uc007ger.1	7	ENSMUSG00000035278	Plekhj1	pleckstrin homology domain containing, family J member 1
814	chr10	80798630	80798649	20	*	2.40796e-11	0.346155	0.00114551	0.345009	Promoter (<=1kb)	chr10	80796099	80798626	2528	-	78670	uc007ger.1	-4	ENSMUSG00000035278	Plekhj1	pleckstrin homology domain containing, family J member 1
815	chr10	80799019	80799069	51	*	2.11318e-12	0.345684	0.000602485	0.345082	Promoter (<=1kb)	chr10	80798735	80804922	6188	+	20222	uc011xiv.1	334	ENSMUSG00000020211	Sf3a2	splicing factor 3a, subunit 2
816	chr10	80826949	80827053	105	*	7.39259e-07	0.00465677	0.312737	-0.307864	Promoter (<=1kb)	chr10	80826656	80829290	2635	+	18245	uc033frg.1	397	ENSMUSG00000035242	Oaz1	ornithine decarboxylase antizyme 1
817	chr10	80898174	80898174	1	*	0.00116919	0.171176	0.290633	-0.119457	Promoter (2-3kb)	chr10	80899450	80900969	1520	-	30055	uc007gfi.2	2795	ENSMUSG00000020219	Timm13	translocase of inner mitochondrial membrane 13
818	chr10	80917756	80917756	1	*	0.00183208	0.0123501	0.218717	-0.206367	Promoter (<=1kb)	chr10	80901363	80918245	16883	-	16907	uc007gfk.1	489	ENSMUSG00000062075	Lmnb2	lamin B2
819	chr10	80917888	80917953	66	*	4.47978e-06	0.00393188	0.28587	-0.280871	Promoter (<=1kb)	chr10	80901363	80918245	16883	-	16907	uc007gfk.1	292	ENSMUSG00000062075	Lmnb2	lamin B2
820	chr10	80939808	80939871	64	*	4.21138e-06	0.000864628	2.32273e-05	0.000841401	Distal Intergenic	chr10	80930091	80932204	2114	+	17873	uc007gfl.1	9780	ENSMUSG00000015312	Gadd45b	growth arrest and DNA-damage-inducible 45 beta
821	chr10	80988205	80988272	68	*	0.00103506	0.0101682	0.000365851	0.0098024	Intron (uc007gfm.1/14708, intron 2 of 3)	chr10	80948624	81001365	52742	-	14708	uc007gfm.1	13093	ENSMUSG00000048240	Gng7	guanine nucleotide binding protein (G protein), gamma 7
822	chr10	81070038	81070075	38	*	2.17245e-06	0.00623649	6.83455e-05	0.00616814	Promoter (<=1kb)	chr10	81070083	81082360	12278	+	50492	uc007gfv.2	-45	ENSMUSG00000004929	Thop1	thimet oligopeptidase 1
823	chr10	81106175	81106211	37	*	5.52708e-13	0.343448	0.000467144	0.342981	Promoter (<=1kb)	chr10	81105947	81124697	18751	+	26396	uc007gfx.2	264	ENSMUSG00000035027	Map2k2	mitogen-activated protein kinase kinase 2
824	chr10	81106330	81106330	1	*	0.00151848	0.000931714	0.0224329	-0.0215012	Promoter (<=1kb)	chr10	81105947	81124697	18751	+	26396	uc007gfx.2	383	ENSMUSG00000035027	Map2k2	mitogen-activated protein kinase kinase 2
825	chr10	81167624	81167706	83	*	6.81591e-09	0.00212007	0.338621	-0.336501	Promoter (<=1kb)	chr10	81153966	81167720	13755	-	59004	uc007ggc.3	14	ENSMUSG00000004934	Pias4	protein inhibitor of activated STAT 4
826	chr10	81183120	81183161	42	*	2.26689e-05	2.32386e-05	0.000531793	-0.000508555	Promoter (<=1kb)	chr10	81183263	81193197	9935	+	13144	uc007ggk.2	-143	ENSMUSG00000034974	Dapk3	death-associated protein kinase 3
827	chr10	81266735	81266794	60	*	0.000150543	0.0828296	0.00150506	0.0813245	Promoter (<=1kb)	chr10	81264722	81266926	2205	-	66047	uc007ggy.1	132	ENSMUSG00000034932	Mrpl54	mitochondrial ribosomal protein L54
828	chr10	81320630	81320644	15	*	2.62377e-08	0.00958797	6.78597e-05	0.00952011	Promoter (<=1kb)	chr10	81321103	81326251	5149	+	70312	uc007ghf.2	-473	ENSMUSG00000034889	Cactin	cactin, spliceosome C complex subunit
829	chr10	81320764	81320780	17	*	1.08208e-08	0.332704	0.00183692	0.330867	Promoter (<=1kb)	chr10	81321103	81326251	5149	+	70312	uc007ghf.2	-339	ENSMUSG00000034889	Cactin	cactin, spliceosome C complex subunit
830	chr10	81321379	81321469	91	*	1.20452e-11	0.00328211	2.77857e-05	0.00320166	Promoter (<=1kb)	chr10	81321103	81326251	5149	+	70312	uc007ghf.2	366	ENSMUSG00000034889	Cactin	cactin, spliceosome C complex subunit
831	chr10	81350013	81350045	33	*	8.82119e-05	0.0496651	0.000638727	0.0490263	Promoter (<=1kb)	chr10	81346046	81350369	4324	-	15353	uc007ghj.2	324	ENSMUSG00000020232	Hmg20b	high mobility group 20B
832	chr10	81350235	81350235	1	*	7.61418e-08	2.41497e-05	0.0020309	-0.00200675	Promoter (<=1kb)	chr10	81346046	81350369	4324	-	15353	uc007ghj.2	134	ENSMUSG00000020232	Hmg20b	high mobility group 20B
833	chr10	81350236	81350319	84	*	9.37339e-09	0.342394	0.00222542	0.340168	Promoter (<=1kb)	chr10	81346046	81350369	4324	-	15353	uc007ghj.2	50	ENSMUSG00000020232	Hmg20b	high mobility group 20B
834	chr10	81350320	81350322	3	*	1.07088e-08	3.1228e-05	0.00656663	-0.00653542	Promoter (<=1kb)	chr10	81346046	81350369	4324	-	15353	uc007ghj.2	47	ENSMUSG00000020232	Hmg20b	high mobility group 20B
835	chr10	81350335	81350335	1	*	7.39174e-06	0.336363	0.00819094	0.328172	Promoter (<=1kb)	chr10	81346046	81350369	4324	-	15353	uc007ghj.2	34	ENSMUSG00000020232	Hmg20b	high mobility group 20B
836	chr10	81350341	81350348	8	*	1.97077e-09	3.0373e-05	0.00980116	-0.00977079	Promoter (<=1kb)	chr10	81346046	81350369	4324	-	15353	uc007ghj.2	21	ENSMUSG00000020232	Hmg20b	high mobility group 20B
837	chr10	81350629	81350657	29	*	3.23311e-06	0.0173651	0.000287112	0.0170816	Promoter (<=1kb)	chr10	81346046	81350457	4412	-	15353	uc007ghm.2	-172	ENSMUSG00000020232	Hmg20b	high mobility group 20B
838	chr10	81357473	81357549	77	*	1.38822e-07	2.40805e-05	0.00129373	-0.00126968	Promoter (<=1kb)	chr10	81357570	81364035	6466	+	73822	uc007gho.1	-97	ENSMUSG00000034854	Mfsd12	major facilitator superfamily domain containing 12
839	chr10	81357609	81357700	92	*	8.07986e-07	0.000775374	2.364e-05	0.000751772	Promoter (<=1kb)	chr10	81357570	81364035	6466	+	73822	uc007gho.1	130	ENSMUSG00000034854	Mfsd12	major facilitator superfamily domain containing 12
840	chr10	81378149	81378201	53	*	3.71448e-07	3.57017e-05	0.00272087	-0.00268516	Promoter (<=1kb)	chr10	81366879	81378370	11492	-	56371	uc007ght.1	169	ENSMUSG00000020235	Fzr1	fizzy/cell division cycle 20 related 1 (Drosophila)
841	chr10	81378466	81378518	53	*	5.2505e-08	0.00220617	0.301805	-0.299522	Promoter (<=1kb)	chr10	81366879	81378370	11492	-	56371	uc007ght.1	-96	ENSMUSG00000020235	Fzr1	fizzy/cell division cycle 20 related 1 (Drosophila)
842	chr10	81384212	81384243	32	*	0.000419818	0.000359446	0.0138323	-0.0134729	Promoter (<=1kb)	chr10	81384428	81388352	3925	+	102115	uc007ghu.2	-216	ENSMUSG00000078440	Dohh	deoxyhypusine hydroxylase/monooxygenase
843	chr10	81384409	81384438	30	*	1.59586e-08	0.00231579	0.337224	-0.334877	Promoter (<=1kb)	chr10	81384428	81388352	3925	+	102115	uc007ghu.2	0	ENSMUSG00000078440	Dohh	deoxyhypusine hydroxylase/monooxygenase
844	chr10	81424760	81424787	28	*	1.49328e-08	0.00445459	2.83492e-05	0.00442624	Promoter (2-3kb)	chr10	81396191	81427173	30983	-	18029	uc007ghy.1	2386	ENSMUSG00000055053	Nfic	nuclear factor I/C
845	chr10	81459698	81459698	1	*	0.000238059	0.69447	0.852555	-0.158085	3' UTR	chr10	81459228	81473131	13904	-	319586	uc007gib.2	13433	ENSMUSG00000034818	Celf5	CUGBP, Elav-like family member 5
846	chr10	81477676	81477722	47	*	1.65909e-07	0.0032581	0.328914	-0.325471	Promoter (2-3kb)	chr10	81459228	81474844	15617	-	319586	uc007gic.2	-2832	ENSMUSG00000034818	Celf5	CUGBP, Elav-like family member 5
847	chr10	81482210	81482215	6	*	8.11944e-10	0.00143458	0.34177	-0.340336	Promoter (<=1kb)	chr10	81459228	81482709	23482	-	319586	uc007gid.2	494	ENSMUSG00000034818	Celf5	CUGBP, Elav-like family member 5
848	chr10	81482771	81482780	10	*	2.63131e-12	0.344557	0.000633305	0.343924	Promoter (<=1kb)	chr10	81459228	81482709	23482	-	319586	uc007gid.2	-62	ENSMUSG00000034818	Celf5	CUGBP, Elav-like family member 5
849	chr10	81544703	81544718	16	*	3.05874e-08	0.00362556	0.341741	-0.338099	Promoter (<=1kb)	chr10	81528732	81545046	16315	-	14672	uc007gil.1	328	ENSMUSG00000034781	Gna11	guanine nucleotide binding protein, alpha 11
850	chr10	81545072	81545118	47	*	1.65951e-10	0.347186	0.000746832	0.346249	Promoter (<=1kb)	chr10	81528732	81545046	16315	-	14672	uc007gil.1	-26	ENSMUSG00000034781	Gna11	guanine nucleotide binding protein, alpha 11
851	chr10	81545523	81545549	27	*	1.33529e-05	0.274729	0.0032565	0.271472	Promoter (<=1kb)	chr10	81528732	81545046	16315	-	14672	uc007gil.1	-477	ENSMUSG00000034781	Gna11	guanine nucleotide binding protein, alpha 11
852	chr10	81559392	81559401	10	*	0.00237416	0.0923824	0.00436468	0.0879374	Promoter (<=1kb)	chr10	81559444	81566371	6928	+	14797	uc007gim.2	-52	ENSMUSG00000054452	Aes	amino-terminal enhancer of split
853	chr10	81559740	81559785	46	*	3.1559e-05	6.70484e-05	0.00335921	-0.00329216	Promoter (<=1kb)	chr10	81559444	81566371	6928	+	14797	uc007gim.2	341	ENSMUSG00000054452	Aes	amino-terminal enhancer of split
854	chr10	81570860	81570887	28	*	2.54339e-06	0.00413002	6.07807e-05	0.00406941	Distal Intergenic	chr10	81575287	81590473	15187	+	21886	uc007gio.2	-4427	ENSMUSG00000034771	Tle2	transducin-like enhancer of split 2, homolog of Drosophila E(spl)
855	chr10	81570921	81571021	101	*	1.35947e-07	0.00406499	0.316223	-0.312158	Distal Intergenic	chr10	81575287	81590473	15187	+	21886	uc007gio.2	-4366	ENSMUSG00000034771	Tle2	transducin-like enhancer of split 2, homolog of Drosophila E(spl)
856	chr10	82241294	82241294	1	*	3.30378e-09	0.00142477	0.310733	-0.309308	Promoter (<=1kb)	chr10	82224856	82241275	16420	-	237411	uc007gjl.3	-19	ENSMUSG00000062931	Zfp938	zinc finger protein 938
857	chr10	82699001	82699067	67	*	3.08578e-05	2.61554e-05	0.000988281	-0.000962097	Promoter (<=1kb)	chr10	82699007	82741392	42386	+	67933	uc007gjt.1	0	ENSMUSG00000020246	Hcfc2	host cell factor C2
858	chr10	82699315	82699340	26	*	2.02552e-08	0.334405	0.00370556	0.330805	Promoter (<=1kb)	chr10	82699007	82741392	42386	+	67933	uc007gjt.1	333	ENSMUSG00000020246	Hcfc2	host cell factor C2
859	chr10	82763473	82763584	112	*	2.29234e-05	0.00583793	0.270176	-0.264488	Promoter (<=1kb)	chr10	82748700	82764141	15442	-	18045	uc007gjv.1	557	ENSMUSG00000020248	Nfyb	nuclear transcription factor-Y beta
860	chr10	82763781	82763799	19	*	2.43511e-05	0.0015305	2.73672e-05	0.00150313	Promoter (<=1kb)	chr10	82748700	82764141	15442	-	18045	uc007gjv.1	342	ENSMUSG00000020248	Nfyb	nuclear transcription factor-Y beta
861	chr10	82763936	82763976	41	*	3.02982e-13	0.346332	0.000478976	0.345857	Promoter (<=1kb)	chr10	82748700	82764141	15442	-	18045	uc007gjv.1	165	ENSMUSG00000020248	Nfyb	nuclear transcription factor-Y beta
862	chr10	83063028	83063054	27	*	0.000519831	0.0866092	0.282154	-0.195544	Intron (uc007gke.1/58250, intron 1 of 2)	chr10	82985749	83195891	210143	+	58250	uc011xjs.1	77305	ENSMUSG00000034612	Chst11	carbohydrate sulfotransferase 11
863	chr10	83337218	83337267	50	*	5.1534e-11	0.298294	0.000676926	0.297617	Promoter (<=1kb)	chr10	83231139	83337817	106679	-	338365	uc007gkf.1	550	ENSMUSG00000034591	Slc41a2	solute carrier family 41, member 2
864	chr10	83337345	83337371	27	*	2.96918e-05	0.000354923	0.012779	-0.0124241	Promoter (<=1kb)	chr10	83231139	83337817	106679	-	338365	uc007gkf.1	446	ENSMUSG00000034591	Slc41a2	solute carrier family 41, member 2
865	chr10	83648652	83648695	44	*	1.58913e-09	0.339638	0.00211158	0.337526	Promoter (<=1kb)	chr10	83600034	83648664	48631	-	216190	uc007gkk.1	0	ENSMUSG00000020263	Appl2	adaptor protein, phosphotyrosine interaction, PH domain and leucine zipper containing 2
866	chr10	84440225	84440225	1	*	0.00329904	0.254695	0.0216091	0.233086	Promoter (<=1kb)	chr10	84371319	84440471	69153	-	77976	uc007gko.1	246	ENSMUSG00000020032	Nuak1	NUAK family, SNF1-like kinase, 1
867	chr10	84440704	84440716	13	*	2.67263e-09	0.00219097	0.341817	-0.339626	Promoter (<=1kb)	chr10	84371319	84440471	69153	-	77976	uc007gko.1	-233	ENSMUSG00000020032	Nuak1	NUAK family, SNF1-like kinase, 1
868	chr10	84441216	84441418	203	*	1.19862e-07	0.00174956	2.35436e-05	0.00172604	Promoter (<=1kb)	chr10	84371319	84440471	69153	-	77976	uc007gko.1	-745	ENSMUSG00000020032	Nuak1	NUAK family, SNF1-like kinase, 1
869	chr10	85102693	85102743	51	*	5.73841e-08	0.00392386	3.58861e-05	0.00388798	Promoter (<=1kb)	chr10	85102627	85117747	15121	+	103266	uc007glb.2	116	ENSMUSG00000060935	Tmem263	transmembrane protein 263
870	chr10	85388203	85388249	47	*	1.53186e-07	0.352016	0.0024835	0.349273	Promoter (1-2kb)	chr10	85386814	85660292	273479	+	74007	uc007glg.2	1435	ENSMUSG00000020042	Btbd11	BTB (POZ) domain containing 11
871	chr10	87492658	87492680	23	*	3.43605e-06	0.332171	0.00674431	0.325426	Promoter (<=1kb)	chr10	87491041	87493660	2620	-	17172	uc007gqs.1	980	ENSMUSG00000020052	Ascl1	achaete-scute complex homolog 1 (Drosophila)
872	chr10	87493017	87493243	227	*	1.04413e-08	0.00348905	0.334076	-0.330587	Promoter (<=1kb)	chr10	87491041	87493660	2620	-	17172	uc007gqs.1	417	ENSMUSG00000020052	Ascl1	achaete-scute complex homolog 1 (Drosophila)
873	chr10	88504044	88504057	14	*	1.56159e-08	0.330592	0.0025734	0.328018	Promoter (<=1kb)	chr10	88472813	88503970	31158	-	212862	uc007grq.2	-74	ENSMUSG00000060002	Chpt1	choline phosphotransferase 1
874	chr10	89686103	89686103	1	*	1.43776e-06	0.00324408	4.32098e-05	0.00320087	Promoter (<=1kb)	chr10	89640107	89686285	46179	-	213326	uc007gsm.1	182	ENSMUSG00000069539	Scyl2	SCY1-like 2 (S. cerevisiae)
875	chr10	89686118	89686118	1	*	8.1557e-08	0.00314233	0.325544	-0.322402	Promoter (<=1kb)	chr10	89640107	89686285	46179	-	213326	uc007gsm.1	167	ENSMUSG00000069539	Scyl2	SCY1-like 2 (S. cerevisiae)
876	chr10	89686123	89686123	1	*	1.15504e-06	0.00308689	3.96283e-05	0.00304726	Promoter (<=1kb)	chr10	89640107	89686285	46179	-	213326	uc007gsm.1	162	ENSMUSG00000069539	Scyl2	SCY1-like 2 (S. cerevisiae)
877	chr10	89686125	89686145	21	*	1.08006e-07	0.00328161	0.325606	-0.322324	Promoter (<=1kb)	chr10	89640107	89686285	46179	-	213326	uc007gsm.1	140	ENSMUSG00000069539	Scyl2	SCY1-like 2 (S. cerevisiae)
878	chr10	89686294	89686303	10	*	0.000148614	0.000299492	2.32789e-05	0.000276213	Promoter (<=1kb)	chr10	89640107	89686285	46179	-	213326	uc007gsm.1	-9	ENSMUSG00000069539	Scyl2	SCY1-like 2 (S. cerevisiae)
879	chr10	89872946	89872992	47	*	4.31714e-06	0.00113621	2.58674e-05	0.00111041	Promoter (<=1kb)	chr10	89873509	90972984	1099476	+	77531	uc033frv.1	-563	ENSMUSG00000058589	Anks1b	ankyrin repeat and sterile alpha motif domain containing 1B
880	chr10	89873430	89873430	1	*	0.000240491	0.302147	0.0138373	0.288309	Promoter (<=1kb)	chr10	89873509	90972984	1099476	+	77531	uc033frv.1	-79	ENSMUSG00000058589	Anks1b	ankyrin repeat and sterile alpha motif domain containing 1B
881	chr10	91123436	91123470	35	*	7.94939e-11	0.333973	0.000865991	0.333107	Promoter (<=1kb)	chr10	91116578	91123963	7386	-	18674	uc007gtn.1	493	ENSMUSG00000061904	Slc25a3	solute carrier family 25 (mitochondrial carrier, phosphate carrier), member 3
882	chr10	91123899	91123905	7	*	2.4798e-10	0.0135641	5.21013e-05	0.013512	Promoter (<=1kb)	chr10	91116578	91123963	7386	-	18674	uc007gtn.1	58	ENSMUSG00000061904	Slc25a3	solute carrier family 25 (mitochondrial carrier, phosphate carrier), member 3
883	chr10	91170286	91170295	10	*	2.32242e-05	0.00536666	0.259014	-0.253996	Promoter (<=1kb)	chr10	91147571	91170550	22980	-	21917	uc007gtp.2	255	ENSMUSG00000019961	Tmpo	thymopoietin
884	chr10	91170729	91170764	36	*	3.7099e-12	0.000633853	0.344786	-0.344152	Promoter (<=1kb)	chr10	91147571	91170550	22980	-	21917	uc007gtp.2	-179	ENSMUSG00000019961	Tmpo	thymopoietin
885	chr10	91170766	91170786	21	*	1.76523e-05	0.000635603	2.3552e-05	0.000612017	Promoter (<=1kb)	chr10	91147571	91170550	22980	-	21917	uc007gtp.2	-216	ENSMUSG00000019961	Tmpo	thymopoietin
886	chr10	91170787	91170787	1	*	4.80919e-13	0.000505303	0.347069	-0.346564	Promoter (<=1kb)	chr10	91147571	91170550	22980	-	21917	uc007gtp.2	-237	ENSMUSG00000019961	Tmpo	thymopoietin
887	chr10	91170800	91170800	1	*	4.02786e-05	0.000417727	2.29805e-05	0.000394747	Promoter (<=1kb)	chr10	91147571	91170550	22980	-	21917	uc007gtp.2	-250	ENSMUSG00000019961	Tmpo	thymopoietin
888	chr10	91170801	91170805	5	*	7.32281e-14	0.000400334	0.347423	-0.347023	Promoter (<=1kb)	chr10	91147571	91170550	22980	-	21917	uc007gtp.2	-251	ENSMUSG00000019961	Tmpo	thymopoietin
889	chr10	91170806	91170806	1	*	4.54562e-05	0.000383967	2.29248e-05	0.000361042	Promoter (<=1kb)	chr10	91147571	91170550	22980	-	21917	uc007gtp.2	-256	ENSMUSG00000019961	Tmpo	thymopoietin
890	chr10	91170814	91170814	1	*	1.40851e-14	0.00034375	0.347595	-0.347251	Promoter (<=1kb)	chr10	91147571	91170550	22980	-	21917	uc007gtp.2	-264	ENSMUSG00000019961	Tmpo	thymopoietin
891	chr10	91170815	91170816	2	*	4.6615e-05	0.00033719	2.28796e-05	0.000314311	Promoter (<=1kb)	chr10	91147571	91170550	22980	-	21917	uc007gtp.2	-265	ENSMUSG00000019961	Tmpo	thymopoietin
892	chr10	91170911	91170920	10	*	0.00251442	0.000314598	0.00922555	-0.00891095	Promoter (<=1kb)	chr10	91147571	91170550	22980	-	21917	uc007gtp.2	-361	ENSMUSG00000019961	Tmpo	thymopoietin
893	chr10	91171102	91171152	51	*	1.17446e-10	0.0011444	0.344645	-0.343501	Promoter (<=1kb)	chr10	91147571	91171619	24049	-	21917	uc007gtq.2	467	ENSMUSG00000019961	Tmpo	thymopoietin
894	chr10	91171309	91171309	1	*	0.000400001	0.00896217	0.000226767	0.0087354	Promoter (<=1kb)	chr10	91147571	91171619	24049	-	21917	uc007gtq.2	310	ENSMUSG00000019961	Tmpo	thymopoietin
895	chr10	91171824	91171948	125	*	7.84377e-08	0.00272372	0.305238	-0.302515	Promoter (<=1kb)	chr10	91147571	91171619	24049	-	21917	uc007gtq.2	-205	ENSMUSG00000019961	Tmpo	thymopoietin
896	chr10	93160645	93160723	79	*	8.90565e-12	0.000696149	0.338862	-0.338166	Promoter (<=1kb)	chr10	93160876	93225368	64493	+	237459	uc007guk.2	-231	ENSMUSG00000020015	Cdk17	cyclin-dependent kinase 17
897	chr10	93161402	93161489	88	*	6.83367e-06	2.4058e-05	0.000851711	-0.000827435	Promoter (<=1kb)	chr10	93160876	93225368	64493	+	237459	uc007guk.2	613	ENSMUSG00000020015	Cdk17	cyclin-dependent kinase 17
898	chr10	93161565	93161584	20	*	1.19844e-07	0.0024138	2.81069e-05	0.0023857	Promoter (<=1kb)	chr10	93160876	93225368	64493	+	237459	uc007guk.2	708	ENSMUSG00000020015	Cdk17	cyclin-dependent kinase 17
899	chr10	93161650	93161650	1	*	1.18676e-06	0.00778879	0.345515	-0.337727	Promoter (<=1kb)	chr10	93160876	93225368	64493	+	237459	uc007guk.2	774	ENSMUSG00000020015	Cdk17	cyclin-dependent kinase 17
900	chr10	93310114	93310138	25	*	3.66967e-05	0.000652356	2.63225e-05	0.000626033	Promoter (1-2kb)	chr10	93247416	93311159	63744	-	13713	uc011xlt.1	1021	ENSMUSG00000008398	Elk3	ELK3, member of ETS oncogene family
901	chr10	93310329	93310341	13	*	0.00017826	0.00220278	0.12047	-0.118268	Promoter (<=1kb)	chr10	93247416	93311159	63744	-	13713	uc011xlt.1	818	ENSMUSG00000008398	Elk3	ELK3, member of ETS oncogene family
902	chr10	93310415	93310416	2	*	0.000991805	0.0024375	0.000105122	0.00233238	Promoter (<=1kb)	chr10	93247416	93311159	63744	-	13713	uc011xlt.1	743	ENSMUSG00000008398	Elk3	ELK3, member of ETS oncogene family
903	chr10	93641321	93641440	120	*	0.00126717	0.287245	0.0168858	0.27096	Promoter (<=1kb)	chr10	93641049	93745972	104924	+	57764	uc007gux.2	391	ENSMUSG00000020019	Ntn4	netrin 4
904	chr10	93641618	93641651	34	*	0.00157513	0.210096	0.00901735	0.201079	Promoter (<=1kb)	chr10	93641049	93745972	104924	+	57764	uc007gux.2	602	ENSMUSG00000020019	Ntn4	netrin 4
905	chr10	94147963	94147963	1	*	0.000612436	0.00457015	0.165442	-0.160872	Promoter (<=1kb)	chr10	94147931	94197214	49284	+	22025	uc007gvo.2	32	ENSMUSG00000005897	Nr2c1	nuclear receptor subfamily 2, group C, member 1
906	chr10	94148155	94148179	25	*	0.000343074	0.251701	0.00734195	0.244359	Promoter (<=1kb)	chr10	94147931	94197214	49284	+	22025	uc007gvo.2	248	ENSMUSG00000005897	Nr2c1	nuclear receptor subfamily 2, group C, member 1
907	chr10	94312403	94312439	37	*	7.74354e-06	0.0010066	3.47841e-05	0.000971815	Intron (uc007gvs.1/uc007gvs.1, intron 1 of 1)	chr10	94293663	94298703	5041	-	215472	uc007gvr.2	-13700	ENSMUSG00000053420	Gm4792	predicted gene 4792
908	chr10	94688743	94688822	80	*	1.19916e-08	0.00331613	0.344545	-0.341203	Promoter (<=1kb)	chr10	94688790	94742691	53902	+	77048	uc007gvw.1	0	ENSMUSG00000020024	Cep83	centrosomal protein 83
909	chr10	94688826	94688871	46	*	1.54736e-11	0.00486091	3.59879e-05	0.00482492	Promoter (<=1kb)	chr10	94688790	94742691	53902	+	77048	uc007gvw.1	81	ENSMUSG00000020024	Cep83	centrosomal protein 83
910	chr10	94689082	94689126	45	*	1.39158e-08	0.00243199	0.340019	-0.337311	Promoter (<=1kb)	chr10	94688790	94742691	53902	+	77048	uc007gvw.1	336	ENSMUSG00000020024	Cep83	centrosomal protein 83
911	chr10	94945156	94945224	69	*	1.52962e-06	0.00240534	3.62258e-05	0.00236654	Promoter (<=1kb)	chr10	94790866	94944578	153713	-	54712	uc007gvz.3	-578	ENSMUSG00000074785	Plxnc1	plexin C1
912	chr10	95414467	95414472	6	*	2.25648e-05	6.41555e-05	0.00419929	-0.00413513	Promoter (<=1kb)	chr10	95411490	95415283	3794	-	216233	uc011xmb.1	811	ENSMUSG00000020027	Socs2	suppressor of cytokine signaling 2
913	chr10	95414688	95414713	26	*	1.6092e-05	0.00976249	0.000129785	0.00963271	Promoter (<=1kb)	chr10	95411490	95415283	3794	-	216233	uc011xmb.1	570	ENSMUSG00000020027	Socs2	suppressor of cytokine signaling 2
914	chr10	95416677	95416682	6	*	8.12196e-07	0.342786	0.0062764	0.336526	Promoter (<=1kb)	chr10	95411490	95416857	5368	-	216233	uc007gwg.2	175	ENSMUSG00000020027	Socs2	suppressor of cytokine signaling 2
915	chr10	95416852	95416955	104	*	3.1797e-06	0.00573188	7.03876e-05	0.0056615	Promoter (<=1kb)	chr10	95411490	95416857	5368	-	216233	uc007gwg.2	0	ENSMUSG00000020027	Socs2	suppressor of cytokine signaling 2
916	chr10	95515610	95515616	7	*	1.19532e-07	5.9774e-05	0.00559668	-0.0055369	Promoter (<=1kb)	chr10	95515162	95545658	30497	+	93765	uc007gwm.1	454	ENSMUSG00000074781	Ube2n	ubiquitin-conjugating enzyme E2N
917	chr10	95515651	95515669	19	*	6.24623e-11	0.344754	0.00100375	0.343763	Promoter (<=1kb)	chr10	95515162	95545658	30497	+	93765	uc007gwm.1	507	ENSMUSG00000074781	Ube2n	ubiquitin-conjugating enzyme E2N
918	chr10	95515678	95515678	1	*	4.50022e-06	2.40061e-05	0.00102453	-0.00100052	Promoter (<=1kb)	chr10	95515162	95545658	30497	+	93765	uc007gwm.1	516	ENSMUSG00000074781	Ube2n	ubiquitin-conjugating enzyme E2N
919	chr10	96617209	96617211	3	*	0.000994324	0.0590341	0.00132775	0.0577064	Promoter (<=1kb)	chr10	96617001	96622811	5811	+	12226	uc007gww.2	210	ENSMUSG00000036478	Btg1	B cell translocation gene 1, anti-proliferative
920	chr10	96617343	96617377	35	*	1.07851e-09	0.00796712	3.66725e-05	0.00793045	Promoter (<=1kb)	chr10	96617001	96622811	5811	+	12226	uc007gww.2	376	ENSMUSG00000036478	Btg1	B cell translocation gene 1, anti-proliferative
921	chr10	97457512	97457523	12	*	9.86586e-05	0.83965	0.938218	-0.0984173	Distal Intergenic	chr10	97479500	97518162	38663	+	13179	uc007gwx.2	-21988	ENSMUSG00000019929	Dcn	decorin
922	chr10	98914089	98914099	11	*	7.9398e-05	2.30941e-05	0.000362195	-0.000339101	Promoter (1-2kb)	chr10	98915152	99026143	110992	+	67972	uc007gxf.2	-1063	ENSMUSG00000019943	Atp2b1	ATPase, Ca++ transporting, plasma membrane 1
923	chr10	98914338	98914420	83	*	8.14361e-12	0.000951774	0.34488	-0.343928	Promoter (<=1kb)	chr10	98915152	99026143	110992	+	67972	uc007gxf.2	-814	ENSMUSG00000019943	Atp2b1	ATPase, Ca++ transporting, plasma membrane 1
924	chr10	98914456	98914479	24	*	2.52469e-05	0.00048941	2.31916e-05	0.000466218	Promoter (<=1kb)	chr10	98915152	99026143	110992	+	67972	uc007gxf.2	-696	ENSMUSG00000019943	Atp2b1	ATPase, Ca++ transporting, plasma membrane 1
925	chr10	98914482	98914482	1	*	5.60556e-11	0.00101456	0.344368	-0.343353	Promoter (<=1kb)	chr10	98915152	99026143	110992	+	67972	uc007gxf.2	-670	ENSMUSG00000019943	Atp2b1	ATPase, Ca++ transporting, plasma membrane 1
926	chr10	98915065	98915089	25	*	6.96338e-08	0.00371536	0.340845	-0.336926	Promoter (<=1kb)	chr10	98915152	99026143	110992	+	67972	uc007gxf.2	-87	ENSMUSG00000019943	Atp2b1	ATPase, Ca++ transporting, plasma membrane 1
927	chr10	98915469	98915521	53	*	1.0549e-09	0.00299917	2.37686e-05	0.00297567	Promoter (<=1kb)	chr10	98915152	99026143	110992	+	67972	uc007gxf.2	369	ENSMUSG00000019943	Atp2b1	ATPase, Ca++ transporting, plasma membrane 1
928	chr10	99107272	99107328	57	*	2.87802e-06	0.00708456	7.19824e-05	0.00701257	Promoter (<=1kb)	chr10	99107171	99197988	90818	+	382406	uc007gxh.1	157	ENSMUSG00000019952	Poc1b	POC1 centriolar protein homolog B (Chlamydomonas)
929	chr10	99107449	99107474	26	*	9.00351e-08	0.324404	0.00341496	0.32101	Promoter (<=1kb)	chr10	99107741	99197988	90248	+	382406	uc007gxi.1	-292	ENSMUSG00000019952	Poc1b	POC1 centriolar protein homolog B (Chlamydomonas)
930	chr10	99107740	99107740	1	*	0.000459821	0.0336278	0.000987219	0.0326405	Promoter (<=1kb)	chr10	99107741	99197988	90248	+	382406	uc007gxi.1	-1	ENSMUSG00000019952	Poc1b	POC1 centriolar protein homolog B (Chlamydomonas)
931	chr10	99261549	99261575	27	*	0.000382453	0.000115215	0.00427252	-0.0041573	Promoter (1-2kb)	chr10	99263231	99267489	4259	+	67603	uc007gxk.2	-1682	ENSMUSG00000019960	Dusp6	dual specificity phosphatase 6
932	chr10	99261665	99261773	109	*	1.44736e-08	0.0246634	5.91637e-05	0.0246117	Promoter (1-2kb)	chr10	99263231	99267489	4259	+	67603	uc007gxk.2	-1566	ENSMUSG00000019960	Dusp6	dual specificity phosphatase 6
933	chr10	99262056	99262056	1	*	2.5228e-05	2.33077e-05	0.000940274	-0.000916967	Promoter (1-2kb)	chr10	99263231	99267489	4259	+	67603	uc007gxk.2	-1175	ENSMUSG00000019960	Dusp6	dual specificity phosphatase 6
934	chr10	99262061	99262098	38	*	6.13512e-11	0.341822	0.000987009	0.340835	Promoter (1-2kb)	chr10	99263231	99267489	4259	+	67603	uc007gxk.2	-1170	ENSMUSG00000019960	Dusp6	dual specificity phosphatase 6
935	chr10	99262105	99262105	1	*	1.73207e-05	3.06649e-05	0.00100956	-0.000978891	Promoter (1-2kb)	chr10	99263231	99267489	4259	+	67603	uc007gxk.2	-1126	ENSMUSG00000019960	Dusp6	dual specificity phosphatase 6
936	chr10	99262771	99262782	12	*	2.25479e-05	0.0171913	0.00032876	0.0168625	Promoter (<=1kb)	chr10	99263231	99267489	4259	+	67603	uc007gxk.2	-460	ENSMUSG00000019960	Dusp6	dual specificity phosphatase 6
937	chr10	99263030	99263180	151	*	4.27318e-10	0.336061	0.00101036	0.335051	Promoter (<=1kb)	chr10	99263231	99267489	4259	+	67603	uc007gxk.2	-201	ENSMUSG00000019960	Dusp6	dual specificity phosphatase 6
938	chr10	105574004	105574077	74	*	2.59496e-08	0.003564	0.341805	-0.338241	Promoter (<=1kb)	chr10	105187664	105574479	386816	-	278279	uc007gym.1	402	ENSMUSG00000036019	Tmtc2	transmembrane and tetratricopeptide repeat containing 2
939	chr10	107272125	107272154	30	*	1.62035e-05	0.23749	0.00434977	0.23314	Promoter (<=1kb)	chr10	107272394	107425143	152750	+	108030	uc033fsp.1	-269	ENSMUSG00000019906	Lin7a	lin-7 homolog A (C. elegans)
940	chr10	107272351	107272387	37	*	1.63038e-06	0.00834299	9.3149e-05	0.00824984	Promoter (<=1kb)	chr10	107272394	107425143	152750	+	108030	uc033fsp.1	-43	ENSMUSG00000019906	Lin7a	lin-7 homolog A (C. elegans)
941	chr10	108162004	108162072	69	*	0.000112391	2.37061e-05	0.000365097	-0.000341391	Promoter (<=1kb)	chr10	108162400	108277575	115176	+	17931	uc007gzc.1	-396	ENSMUSG00000019907	Ppp1r12a	protein phosphatase 1, regulatory (inhibitor) subunit 12A
942	chr10	108162721	108162773	53	*	1.51363e-10	0.336645	0.00103893	0.335606	Promoter (<=1kb)	chr10	108162400	108277575	115176	+	17931	uc007gzc.1	373	ENSMUSG00000019907	Ppp1r12a	protein phosphatase 1, regulatory (inhibitor) subunit 12A
943	chr10	108333012	108333066	55	*	3.19248e-08	2.3405e-05	0.00188003	-0.00185666	Promoter (<=1kb)	chr10	108332688	108414391	81704	+	114774	uc011xnd.1	378	ENSMUSG00000035873	Pawr	PRKC, apoptosis, WT1, regulator
944	chr10	108333072	108333102	31	*	3.7078e-08	0.34388	0.0032242	0.340656	Promoter (<=1kb)	chr10	108332688	108414391	81704	+	114774	uc011xnd.1	414	ENSMUSG00000035873	Pawr	PRKC, apoptosis, WT1, regulator
945	chr10	108333277	108333285	9	*	8.99836e-06	0.329845	0.00859833	0.321246	Promoter (<=1kb)	chr10	108332688	108414391	81704	+	114774	uc011xnd.1	597	ENSMUSG00000035873	Pawr	PRKC, apoptosis, WT1, regulator
946	chr10	109010839	109010882	44	*	3.49362e-08	0.34098	0.00314517	0.337303	Promoter (<=1kb)	chr10	108497650	109010975	513326	-	20979	uc007gzg.2	93	ENSMUSG00000035864	Syt1	synaptotagmin I
947	chr10	110924068	110924069	2	*	0.00283575	0.90574	0.75743	0.14831	Intron (uc007gzs.2/13008, intron 1 of 5)	chr10	110920176	110939514	19339	+	13008	uc007gzs.2	3893	ENSMUSG00000020186	Csrp2	cysteine and glycine-rich protein 2
948	chr10	111473393	111473492	100	*	2.48283e-08	0.00259022	0.323384	-0.321285	Promoter (<=1kb)	chr10	111473192	111495004	21813	+	53605	uc007haa.2	300	ENSMUSG00000058799	Nap1l1	nucleosome assembly protein 1-like 1
949	chr10	111506645	111506750	106	*	6.1651e-05	0.000389405	2.31435e-05	0.000366262	Promoter (<=1kb)	chr10	111506286	111508649	2364	+	21664	uc007haf.2	464	ENSMUSG00000020205	Phlda1	pleckstrin homology-like domain, family A, member 1
950	chr10	111506962	111507002	41	*	6.98669e-06	0.300473	0.00529863	0.295175	Promoter (<=1kb)	chr10	111506286	111508649	2364	+	21664	uc007haf.2	716	ENSMUSG00000020205	Phlda1	pleckstrin homology-like domain, family A, member 1
951	chr10	115314943	115314943	1	*	4.0258e-07	0.00422768	0.330503	-0.326276	Promoter (<=1kb)	chr10	115289862	115315591	25730	-	216344	uc007haz.1	648	ENSMUSG00000020132	Rab21	RAB21, member RAS oncogene family
952	chr10	115315066	115315066	1	*	0.00475162	0.22037	0.0120717	0.208299	Promoter (<=1kb)	chr10	115289862	115315591	25730	-	216344	uc007haz.1	525	ENSMUSG00000020132	Rab21	RAB21, member RAS oncogene family
953	chr10	115315156	115315162	7	*	0.000567828	0.0105279	0.240256	-0.229728	Promoter (<=1kb)	chr10	115289862	115315591	25730	-	216344	uc007haz.1	429	ENSMUSG00000020132	Rab21	RAB21, member RAS oncogene family
954	chr10	115315217	115315371	155	*	1.36628e-08	0.331165	0.00303699	0.328099	Promoter (<=1kb)	chr10	115289862	115315591	25730	-	216344	uc007haz.1	220	ENSMUSG00000020132	Rab21	RAB21, member RAS oncogene family
955	chr10	115384512	115384612	101	*	1.27972e-05	0.00210198	5.72962e-05	0.00204793	Promoter (<=1kb)	chr10	115369966	115384435	14470	-	66816	uc007hbe.1	-77	ENSMUSG00000020137	Thap2	THAP domain containing, apoptosis associated protein 2
956	chr10	115385061	115385114	54	*	0.00139895	0.0511827	0.0060329	0.0453222	Promoter (<=1kb)	chr10	115384959	115432771	47813	+	216345	uc007hbg.1	155	ENSMUSG00000034163	Zfc3h1	zinc finger, C3H1-type containing
957	chr10	115385614	115385676	63	*	0.00039345	0.000650077	0.0186259	-0.0179758	Promoter (<=1kb)	chr10	115384959	115432771	47813	+	216345	uc007hbg.1	717	ENSMUSG00000034163	Zfc3h1	zinc finger, C3H1-type containing
958	chr10	115385843	115385860	18	*	7.85044e-12	0.000737264	0.342811	-0.342059	Promoter (<=1kb)	chr10	115384959	115432771	47813	+	216345	uc007hbg.1	901	ENSMUSG00000034163	Zfc3h1	zinc finger, C3H1-type containing
959	chr10	116580945	116581010	66	*	4.61611e-08	0.330589	0.0039375	0.327012	Promoter (<=1kb)	chr10	116485161	116581511	96351	-	72068	uc007hca.2	501	ENSMUSG00000020166	Cnot2	CCR4-NOT transcription complex, subunit 2
960	chr10	117224417	117224522	106	*	4.36106e-06	0.00328526	4.84917e-05	0.00323677	Promoter (<=1kb)	chr10	117215141	117224507	9367	-	64050	uc007hcx.2	0	ENSMUSG00000020171	Yeats4	YEATS domain containing 4
961	chr10	117709999	117710015	17	*	4.94732e-08	0.332677	0.00290159	0.329775	Promoter (<=1kb)	chr10	117688875	117710028	21154	-	17246	uc007hdl.2	13	ENSMUSG00000020184	Mdm2	transformed mouse 3T3 cell double minute 2
962	chr10	117710200	117710255	56	*	6.75601e-08	0.00254428	0.307225	-0.304681	Promoter (<=1kb)	chr10	117688875	117710028	21154	-	17246	uc007hdl.2	-172	ENSMUSG00000020184	Mdm2	transformed mouse 3T3 cell double minute 2
963	chr10	117710351	117710353	3	*	0.00514876	0.00658684	0.000450782	0.00613606	Promoter (<=1kb)	chr10	117688875	117710028	21154	-	17246	uc007hdl.2	-323	ENSMUSG00000020184	Mdm2	transformed mouse 3T3 cell double minute 2
964	chr10	117710696	117710696	1	*	2.11439e-11	0.000981336	0.342411	-0.341429	Promoter (<=1kb)	chr10	117688875	117710758	21884	-	17246	uc007hdm.2	62	ENSMUSG00000020184	Mdm2	transformed mouse 3T3 cell double minute 2
965	chr10	118141772	118141881	110	*	9.73984e-13	0.337486	0.000561201	0.336324	Promoter (<=1kb)	chr10	118141787	118148139	6353	+	17245	uc007hds.2	0	ENSMUSG00000020212	Mdm1	transformed mouse 3T3 cell double minute 1
966	chr10	118142100	118142100	1	*	0.000905282	0.314852	0.0229952	0.291856	Promoter (<=1kb)	chr10	118141787	118148139	6353	+	17245	uc007hds.2	313	ENSMUSG00000020212	Mdm1	transformed mouse 3T3 cell double minute 1
967	chr10	118560692	118560705	14	*	0.00118444	0.824902	0.92524	-0.100338	Distal Intergenic	chr10	118502035	118556525	54491	-	103214	uc033fst.1	-4167	#N/A	Tmevpg1	Theiler's murine encephalomyelitis virus persistence candidate gene 1
968	chr10	118868182	118868295	114	*	1.47555e-12	0.000630094	0.344733	-0.344149	Promoter (<=1kb)	chr10	118859349	118868903	9555	-	69181	uc007hea.1	608	ENSMUSG00000028630	Dyrk2	dual-specificity tyrosine-(Y)-phosphorylation regulated kinase 2
969	chr10	118868367	118868523	157	*	5.7852e-05	0.281572	0.00902482	0.27289	Promoter (<=1kb)	chr10	118859349	118868903	9555	-	69181	uc007hea.1	380	ENSMUSG00000028630	Dyrk2	dual-specificity tyrosine-(Y)-phosphorylation regulated kinase 2
970	chr10	119060393	119060393	1	*	0.000919303	0.765386	0.567417	0.197968	Distal Intergenic	chr10	119092905	119103107	10203	+	73400	uc029rjf.1	-32512	ENSMUSG00000100681	1700064J06Rik	RIKEN cDNA 1700064J06 gene
971	chr10	119239445	119239495	51	*	0.000872455	0.2505	0.011503	0.238072	Promoter (<=1kb)	chr10	119198812	119240055	41244	-	71902	uc007hec.2	560	ENSMUSG00000020114	Cand1	cullin associated and neddylation disassociated 1
972	chr10	119239536	119239618	83	*	4.42564e-07	8.37584e-05	0.00771295	-0.00762919	Promoter (<=1kb)	chr10	119198812	119240055	41244	-	71902	uc007hec.2	437	ENSMUSG00000020114	Cand1	cullin associated and neddylation disassociated 1
973	chr10	119239700	119239715	16	*	3.67916e-06	0.00139155	3.5234e-05	0.00135632	Promoter (<=1kb)	chr10	119198812	119240055	41244	-	71902	uc007hec.2	340	ENSMUSG00000020114	Cand1	cullin associated and neddylation disassociated 1
974	chr10	119239961	119240046	86	*	8.17011e-12	0.338642	0.000902597	0.337713	Promoter (<=1kb)	chr10	119198812	119240055	41244	-	71902	uc007hec.2	9	ENSMUSG00000020114	Cand1	cullin associated and neddylation disassociated 1
975	chr10	120474890	120474922	33	*	5.17275e-05	0.00856858	0.328223	-0.319654	Promoter (2-3kb)	chr10	120361275	120476935	115661	-	15364	uc007hfb.1	2013	ENSMUSG00000056758	Hmga2	high mobility group AT-hook 2
976	chr10	120474972	120475069	98	*	1.64443e-07	0.343183	0.00305155	0.339909	Promoter (1-2kb)	chr10	120361275	120476935	115661	-	15364	uc007hfb.1	1866	ENSMUSG00000056758	Hmga2	high mobility group AT-hook 2
977	chr10	120475214	120475214	1	*	5.41222e-12	0.000731416	0.339674	-0.338943	Promoter (1-2kb)	chr10	120361275	120476935	115661	-	15364	uc007hfb.1	1721	ENSMUSG00000056758	Hmga2	high mobility group AT-hook 2
978	chr10	120475604	120475687	84	*	9.97312e-07	0.00472128	0.293245	-0.288491	Promoter (1-2kb)	chr10	120361275	120476935	115661	-	15364	uc007hfb.1	1248	ENSMUSG00000056758	Hmga2	high mobility group AT-hook 2
979	chr10	120475760	120475804	45	*	1.12861e-11	0.342807	0.000795408	0.34207	Promoter (1-2kb)	chr10	120361275	120476935	115661	-	15364	uc007hfb.1	1131	ENSMUSG00000056758	Hmga2	high mobility group AT-hook 2
980	chr10	120475897	120475999	103	*	9.40929e-09	0.00282351	0.340907	-0.338084	Promoter (<=1kb)	chr10	120361275	120476935	115661	-	15364	uc007hfb.1	936	ENSMUSG00000056758	Hmga2	high mobility group AT-hook 2
981	chr10	120476192	120476281	90	*	8.95723e-07	0.00452842	0.303168	-0.297061	Promoter (<=1kb)	chr10	120361275	120476935	115661	-	15364	uc007hfb.1	654	ENSMUSG00000056758	Hmga2	high mobility group AT-hook 2
982	chr10	120801890	120801914	25	*	2.35435e-05	0.427538	0.536268	-0.108729	Intron (uc007hfh.2/320183, intron 2 of 6)	chr10	120765732	120774485	8754	+	70874	uc007hff.2	36182	ENSMUSG00000044544	4921513I03Rik	RIKEN cDNA 4921513I03 gene
983	chr10	121296143	121296143	1	*	0.00262989	0.650664	0.914779	-0.264116	Promoter (1-2kb)	chr10	121263820	121294757	30938	-	74694	uc007hfl.2	-1386	ENSMUSG00000052302	Tbc1d30	TBC1 domain family, member 30
984	chr10	121475691	121475786	96	*	5.95668e-11	2.49701e-05	0.00426335	-0.00423863	Promoter (<=1kb)	chr10	121410351	121476250	65900	-	192678	uc007hfs.1	464	ENSMUSG00000025795	Rassf3	Ras association (RalGDS/AF-6) domain family member 3
985	chr10	121475789	121475825	37	*	9.91732e-09	0.00535077	2.47817e-05	0.00532599	Promoter (<=1kb)	chr10	121410351	121476250	65900	-	192678	uc007hfs.1	425	ENSMUSG00000025795	Rassf3	Ras association (RalGDS/AF-6) domain family member 3
986	chr10	121475827	121475827	1	*	1.44789e-06	0.00718972	0.346958	-0.339768	Promoter (<=1kb)	chr10	121410351	121476250	65900	-	192678	uc007hfs.1	423	ENSMUSG00000025795	Rassf3	Ras association (RalGDS/AF-6) domain family member 3
987	chr10	121476247	121476357	111	*	1.67264e-06	2.4217e-05	0.000571511	-0.000547294	Promoter (<=1kb)	chr10	121410351	121476250	65900	-	192678	uc007hfs.1	0	ENSMUSG00000025795	Rassf3	Ras association (RalGDS/AF-6) domain family member 3
988	chr10	121625816	121625828	13	*	2.00275e-05	0.00799794	0.000124252	0.00787369	Promoter (<=1kb)	chr10	121587380	121626316	38937	-	73192	uc007hfv.1	488	ENSMUSG00000034667	Xpot	exportin, tRNA (nuclear export receptor for tRNAs)
989	chr10	121625940	121625991	52	*	1.21309e-05	0.00572077	0.000106079	0.00561469	Promoter (<=1kb)	chr10	121587380	121626316	38937	-	73192	uc007hfv.1	325	ENSMUSG00000034667	Xpot	exportin, tRNA (nuclear export receptor for tRNAs)
990	chr10	121626198	121626198	1	*	0.00732631	0.00275863	0.0489124	-0.0461538	Promoter (<=1kb)	chr10	121587380	121626316	38937	-	73192	uc007hfv.1	118	ENSMUSG00000034667	Xpot	exportin, tRNA (nuclear export receptor for tRNAs)
991	chr10	121626336	121626382	47	*	8.56633e-08	0.00352698	0.342069	-0.338542	Promoter (<=1kb)	chr10	121587380	121626316	38937	-	73192	uc007hfv.1	-20	ENSMUSG00000034667	Xpot	exportin, tRNA (nuclear export receptor for tRNAs)
992	chr10	122985860	122985932	73	*	4.56918e-08	2.76618e-05	0.00605836	-0.0060307	Promoter (<=1kb)	chr10	122985640	122985724	85	-	387251	uc011xpd.1	-136	ENSMUSG00000065406	Mirlet7i	microRNA let7i
993	chr10	123076233	123076254	22	*	1.95336e-05	0.000598709	2.3181e-05	0.000575528	Promoter (<=1kb)	chr10	122992061	123076505	84445	-	67074	uc007hgj.2	251	ENSMUSG00000034602	Mon2	MON2 homolog (yeast)
994	chr10	123076519	123076569	51	*	2.07008e-12	3.70146e-05	0.00738061	-0.0073436	Promoter (<=1kb)	chr10	122992061	123076505	84445	-	67074	uc007hgj.2	-14	ENSMUSG00000034602	Mon2	MON2 homolog (yeast)
995	chr10	123196810	123196878	69	*	3.37396e-05	0.0276129	0.00688363	0.0200172	Promoter (<=1kb)	chr10	123105006	123197019	92014	-	14479	uc007hgn.2	141	ENSMUSG00000020124	Usp15	ubiquitin specific peptidase 15
996	chr10	123197260	123197310	51	*	2.23446e-05	0.000651995	2.41148e-05	0.00062788	Promoter (<=1kb)	chr10	123105006	123197019	92014	-	14479	uc007hgn.2	-241	ENSMUSG00000020124	Usp15	ubiquitin specific peptidase 15
997	chr10	125966505	125966638	134	*	3.28684e-07	0.329816	0.00439811	0.325418	Promoter (<=1kb)	chr10	125966219	125998013	31795	+	320398	uc007hhb.2	419	ENSMUSG00000020105	Lrig3	leucine-rich repeats and immunoglobulin-like domains 3
998	chr10	126978606	126978827	222	*	3.07524e-07	0.00302066	0.320316	-0.315222	Promoter (<=1kb)	chr10	126978717	126999975	21259	+	52468	uc007hhj.2	0	ENSMUSG00000078429	Ctdsp2	CTD (carboxy-terminal domain, RNA polymerase II, polypeptide A) small phosphatase 2
999	chr10	126979178	126979219	42	*	2.78984e-07	0.00469273	0.342927	-0.338234	Promoter (<=1kb)	chr10	126978717	126999975	21259	+	52468	uc007hhj.2	502	ENSMUSG00000078429	Ctdsp2	CTD (carboxy-terminal domain, RNA polymerase II, polypeptide A) small phosphatase 2
1000	chr10	126979333	126979408	76	*	6.61222e-06	0.310648	0.00610318	0.304409	Promoter (<=1kb)	chr10	126978717	126999975	21259	+	52468	uc007hhj.2	691	ENSMUSG00000078429	Ctdsp2	CTD (carboxy-terminal domain, RNA polymerase II, polypeptide A) small phosphatase 2
1001	chr10	126979612	126979628	17	*	6.03503e-08	0.329429	0.00289312	0.326722	Promoter (<=1kb)	chr10	126978717	126999975	21259	+	52468	uc007hhj.2	911	ENSMUSG00000078429	Ctdsp2	CTD (carboxy-terminal domain, RNA polymerase II, polypeptide A) small phosphatase 2
1002	chr10	127007681	127007690	10	*	0.000319271	0.927401	0.824919	0.102482	Intron (uc007hhl.2/11567, intron 5 of 19)	chr10	127000709	127020994	20286	+	11567	uc007hhl.2	6981	ENSMUSG00000025432	Avil	advillin
1003	chr10	127059578	127059605	28	*	3.97889e-06	0.0059187	0.308922	-0.303003	Promoter (<=1kb)	chr10	127056050	127060184	4135	-	216438	uc007hhu.1	579	ENSMUSG00000040502	March9	membrane-associated ring finger (C3HC4) 9
1004	chr10	127059911	127060004	94	*	1.61553e-06	0.00108751	2.4669e-05	0.00106284	Promoter (<=1kb)	chr10	127056050	127060184	4135	-	216438	uc007hhu.1	180	ENSMUSG00000040502	March9	membrane-associated ring finger (C3HC4) 9
1005	chr10	127060159	127060164	6	*	1.31916e-08	0.284978	0.00160835	0.28337	Promoter (<=1kb)	chr10	127056050	127060184	4135	-	216438	uc007hhu.1	20	ENSMUSG00000040502	March9	membrane-associated ring finger (C3HC4) 9
1006	chr10	127060165	127060189	25	*	1.79547e-05	3.37697e-05	0.00155691	-0.00152314	Promoter (<=1kb)	chr10	127056050	127060184	4135	-	216438	uc007hhu.1	0	ENSMUSG00000040502	March9	membrane-associated ring finger (C3HC4) 9
1007	chr10	127079787	127079805	19	*	1.61638e-07	0.00674005	6.03129e-05	0.00667974	Promoter (<=1kb)	chr10	127078907	127093170	14264	+	216439	uc007hhx.2	898	ENSMUSG00000025422	Agap2	ArfGAP with GTPase domain, ankyrin repeat and PH domain 2
1008	chr10	127177865	127177900	36	*	5.34155e-06	0.000347414	0.0156933	-0.015117	Promoter (2-3kb)	chr10	127172426	127180645	8220	-	216441	uc033fsx.1	2745	ENSMUSG00000040441	Slc26a10	solute carrier family 26, member 10
1009	chr10	127189839	127189896	58	*	1.00496e-07	0.00311733	0.318392	-0.315274	Promoter (<=1kb)	chr10	127182521	127189823	7303	-	52666	uc007hij.2	-16	ENSMUSG00000019467	Arhgef25	Rho guanine nucleotide exchange factor (GEF) 25
1010	chr10	127288693	127288723	31	*	8.1422e-05	2.7674e-05	0.000573226	-0.000545552	Promoter (<=1kb)	chr10	127281956	127288771	6816	-	110962	uc007hiw.1	48	ENSMUSG00000025409	Mbd6	methyl-CpG binding domain protein 6
1011	chr10	127288787	127288819	33	*	1.14136e-08	0.343119	0.00224762	0.34093	Promoter (<=1kb)	chr10	127281956	127288771	6816	-	110962	uc007hiw.1	-16	ENSMUSG00000025409	Mbd6	methyl-CpG binding domain protein 6
1012	chr10	127341862	127342023	162	*	1.58102e-07	5.43023e-05	0.00462376	-0.00456946	Promoter (<=1kb)	chr10	127337390	127341886	4497	-	14632	uc011xpr.1	0	ENSMUSG00000025407	Gli1	GLI-Kruppel family member GLI1
1013	chr10	127380486	127380639	154	*	2.62348e-11	0.000862521	0.336862	-0.335953	Distal Intergenic	chr10	127390311	127499384	109074	+	71750	uc007hjl.2	-9825	ENSMUSG00000025404	R3hdm2	R3H domain containing 2
1014	chr10	127380646	127380646	1	*	3.75767e-05	0.000830728	2.96286e-05	0.000801099	Distal Intergenic	chr10	127390311	127499384	109074	+	71750	uc007hjl.2	-9665	ENSMUSG00000025404	R3hdm2	R3H domain containing 2
1015	chr10	127380653	127380653	1	*	1.24215e-09	0.00140556	0.328644	-0.327238	Distal Intergenic	chr10	127390311	127499384	109074	+	71750	uc007hjl.2	-9658	ENSMUSG00000025404	R3hdm2	R3H domain containing 2
1016	chr10	127380704	127380765	62	*	5.28272e-06	0.00293894	3.95691e-05	0.00289937	Distal Intergenic	chr10	127390311	127499384	109074	+	71750	uc007hjl.2	-9607	ENSMUSG00000025404	R3hdm2	R3H domain containing 2
1017	chr10	127512985	127513033	49	*	3.84607e-05	0.00281745	4.6918e-05	0.00277053	Promoter (1-2kb)	chr10	127514939	127517156	2218	+	407790	uc007hjt.2	-1954	ENSMUSG00000040280	Ndufa4l2	NADH dehydrogenase (ubiquinone) 1 alpha subcomplex, 4-like 2
1018	chr10	127621403	127621500	98	*	0.000678183	0.213703	0.00868561	0.204093	Promoter (<=1kb)	chr10	127538158	127621148	82991	-	16971	uc007hjx.1	-255	ENSMUSG00000040249	Lrp1	low density lipoprotein receptor-related protein 1
1019	chr10	127720451	127720451	1	*	3.9284e-05	0.528948	0.777357	-0.248409	Promoter (1-2kb)	chr10	127719328	127720940	1613	+	432516	uc007hki.2	1123	ENSMUSG00000025401	Myo1a	myosin IA
1020	chr10	127739362	127739402	41	*	7.95644e-05	3.60368e-05	0.000992986	-0.000956124	Promoter (<=1kb)	chr10	127739538	127747339	7802	+	320080	uc007hkl.1	-176	ENSMUSG00000044617	Zbtb39	zinc finger and BTB domain containing 39
1021	chr10	127739814	127739858	45	*	1.10243e-07	0.00164689	2.63324e-05	0.00162056	Promoter (<=1kb)	chr10	127739538	127747339	7802	+	320080	uc007hkl.1	320	ENSMUSG00000044617	Zbtb39	zinc finger and BTB domain containing 39
1022	chr10	127740030	127740066	37	*	3.06083e-05	0.0309816	0.000426721	0.0305549	Promoter (<=1kb)	chr10	127739538	127747339	7802	+	320080	uc007hkl.1	528	ENSMUSG00000044617	Zbtb39	zinc finger and BTB domain containing 39
1023	chr10	128036450	128036497	48	*	1.91665e-09	0.33845	0.00172609	0.336723	Promoter (1-2kb)	chr10	128035346	128048637	13292	+	17938	uc007hlb.2	1151	ENSMUSG00000061315	Naca	nascent polypeptide-associated complex alpha polypeptide
1024	chr10	128058496	128058564	69	*	4.03808e-13	0.000479278	0.34391	-0.343431	Promoter (<=1kb)	chr10	128058982	128077254	18273	+	56351	uc007hld.1	-486	ENSMUSG00000071072	Ptges3	prostaglandin E synthase 3 (cytosolic)
1025	chr10	128058765	128058767	3	*	1.4793e-11	0.345883	0.00083239	0.345051	Promoter (<=1kb)	chr10	128058982	128077254	18273	+	56351	uc007hld.1	-217	ENSMUSG00000071072	Ptges3	prostaglandin E synthase 3 (cytosolic)
1026	chr10	128058894	128058913	20	*	0.000504934	0.0128671	0.26746	-0.254593	Promoter (<=1kb)	chr10	128058982	128077254	18273	+	56351	uc007hld.1	-88	ENSMUSG00000071072	Ptges3	prostaglandin E synthase 3 (cytosolic)
1027	chr10	128058951	128058975	25	*	1.69725e-05	0.000904957	3.37768e-05	0.000871047	Promoter (<=1kb)	chr10	128058982	128077254	18273	+	56351	uc007hld.1	-31	ENSMUSG00000071072	Ptges3	prostaglandin E synthase 3 (cytosolic)
1028	chr10	128059278	128059398	121	*	6.29003e-12	0.342505	0.000780858	0.34189	Promoter (<=1kb)	chr10	128058982	128077254	18273	+	56351	uc007hld.1	416	ENSMUSG00000071072	Ptges3	prostaglandin E synthase 3 (cytosolic)
1029	chr10	128083905	128083926	22	*	9.69257e-06	0.283779	0.0064296	0.277349	Promoter (<=1kb)	chr10	128083307	128090388	7082	+	11947	uc007hle.1	619	ENSMUSG00000025393	Atp5b	ATP synthase, H+ transporting mitochondrial F1 complex, beta subunit
1030	chr10	128092895	128092907	13	*	1.58913e-15	0.345507	0.000216584	0.34529	Promoter (<=1kb)	chr10	128092460	128118655	26196	+	116848	uc007hli.1	447	ENSMUSG00000040054	Baz2a	bromodomain adjacent to zinc finger domain, 2A
1031	chr10	128092971	128092988	18	*	1.05463e-08	2.93606e-05	0.00576099	-0.00573166	Promoter (<=1kb)	chr10	128092460	128118655	26196	+	116848	uc007hli.1	528	ENSMUSG00000040054	Baz2a	bromodomain adjacent to zinc finger domain, 2A
1032	chr10	128093103	128093103	1	*	0.000105843	0.00425113	8.38682e-05	0.00416726	Promoter (<=1kb)	chr10	128092460	128118655	26196	+	116848	uc007hli.1	643	ENSMUSG00000040054	Baz2a	bromodomain adjacent to zinc finger domain, 2A
1033	chr10	128194671	128194686	16	*	0.000568857	0.0588097	0.00280335	0.0559187	Promoter (<=1kb)	chr10	128194635	128210004	15370	+	216456	uc007hlo.2	51	ENSMUSG00000044005	Gls2	glutaminase 2 (liver, mitochondrial)
1034	chr10	128194834	128194877	44	*	3.4589e-11	0.000918228	0.343052	-0.342133	Promoter (<=1kb)	chr10	128194635	128210004	15370	+	216456	uc007hlo.2	242	ENSMUSG00000044005	Gls2	glutaminase 2 (liver, mitochondrial)
1035	chr10	128211835	128211857	23	*	1.67531e-07	0.336287	0.00451833	0.331769	Promoter (<=1kb)	chr10	128209910	128211794	1885	-	66701	uc007hlq.1	-41	ENSMUSG00000051346	Spryd4	SPRY domain containing 4
1036	chr10	128232187	128232307	121	*	3.70948e-09	0.0138267	5.56799e-05	0.0137711	Promoter (<=1kb)	chr10	128232063	128244829	12767	+	21853	uc007hlt.2	244	ENSMUSG00000039994	Timeless	timeless circadian clock 1
1037	chr10	128270729	128270729	1	*	0.000468906	0.00214562	8.30546e-05	0.00206257	Promoter (<=1kb)	chr10	128270576	128292849	22274	+	20847	uc007hma.1	153	ENSMUSG00000040033	Stat2	signal transducer and activator of transcription 2
1038	chr10	128337653	128337734	82	*	1.1813e-08	0.33871	0.00250835	0.336202	Promoter (<=1kb)	chr10	128337832	128362479	24648	+	12974	uc007hmj.1	-179	ENSMUSG00000005683	Cs	citrate synthase
1039	chr10	128525480	128525505	26	*	1.14844e-08	4.89048e-05	0.00644348	-0.00614057	Promoter (<=1kb)	chr10	128510250	128525859	15610	-	23943	uc007hng.1	354	ENSMUSG00000025366	Esyt1	extended synaptotagmin-like protein 1
1040	chr10	128525739	128525785	47	*	4.64747e-09	0.341596	0.00230115	0.339295	Promoter (<=1kb)	chr10	128510250	128525859	15610	-	23943	uc007hng.1	74	ENSMUSG00000025366	Esyt1	extended synaptotagmin-like protein 1
1041	chr10	128565612	128565678	67	*	1.5519e-07	0.00235048	2.88778e-05	0.00232148	Promoter (<=1kb)	chr10	128557766	128565934	8169	-	18813	uc007hnl.1	256	ENSMUSG00000025364	Pa2g4	proliferation-associated 2G4
1042	chr10	128644043	128644062	20	*	0.000636358	0.863812	0.949482	-0.0856699	Promoter (<=1kb)	chr10	128632415	128644648	12234	-	22781	uc007hnp.1	586	ENSMUSG00000002578	Ikzf4	IKAROS family zinc finger 4
1043	chr10	128669194	128669296	103	*	0.00179171	0.0121945	0.212247	-0.198628	Distal Intergenic	chr10	128669887	128673918	4032	-	211389	uc007hnt.2	4622	ENSMUSG00000049858	Suox	sulfite oxidase
1044	chr10	128669310	128669310	1	*	7.13378e-12	0.340666	0.00068976	0.339976	Distal Intergenic	chr10	128669887	128673918	4032	-	211389	uc007hnt.2	4608	ENSMUSG00000049858	Suox	sulfite oxidase
1045	chr10	128669311	128669311	1	*	4.40228e-05	2.78144e-05	0.000697877	-0.000670062	Distal Intergenic	chr10	128669887	128673918	4032	-	211389	uc007hnt.2	4607	ENSMUSG00000049858	Suox	sulfite oxidase
1046	chr10	128669312	128669313	2	*	9.20578e-12	0.340113	0.000712318	0.3394	Distal Intergenic	chr10	128669887	128673918	4032	-	211389	uc007hnt.2	4605	ENSMUSG00000049858	Suox	sulfite oxidase
1047	chr10	128669319	128669319	1	*	4.66441e-05	2.97088e-05	0.000790358	-0.00076065	Distal Intergenic	chr10	128669887	128673918	4032	-	211389	uc007hnt.2	4599	ENSMUSG00000049858	Suox	sulfite oxidase
1048	chr10	128669320	128669340	21	*	8.36469e-10	0.326952	0.0011744	0.325778	Distal Intergenic	chr10	128669887	128673918	4032	-	211389	uc007hnt.2	4578	ENSMUSG00000049858	Suox	sulfite oxidase
1049	chr10	128669350	128669351	2	*	0.000431416	5.31209e-05	0.00134916	-0.00129603	Distal Intergenic	chr10	128669887	128673918	4032	-	211389	uc007hnt.2	4567	ENSMUSG00000049858	Suox	sulfite oxidase
1050	chr10	128674182	128674220	39	*	2.16956e-08	0.00271661	0.336106	-0.333389	Promoter (<=1kb)	chr10	128669887	128673918	4032	-	211389	uc007hnt.2	-264	ENSMUSG00000049858	Suox	sulfite oxidase
1051	chr10	128674296	128674366	71	*	2.13626e-08	0.00198968	3.6107e-05	0.00195083	Promoter (<=1kb)	chr10	128669887	128673918	4032	-	211389	uc007hnt.2	-378	ENSMUSG00000049858	Suox	sulfite oxidase
1052	chr10	128891476	128891516	41	*	0.000542943	0.00900373	0.209578	-0.200374	Promoter (<=1kb)	chr10	128884546	128891718	7173	-	14561	uc007hot.1	202	ENSMUSG00000025352	Gdf11	growth differentiation factor 11
1053	chr10	128891714	128891720	7	*	2.67431e-10	0.00128727	0.345031	-0.343744	Promoter (<=1kb)	chr10	128884546	128891718	7173	-	14561	uc007hot.1	0	ENSMUSG00000025352	Gdf11	growth differentiation factor 11
1054	chr10	128891723	128891723	1	*	1.98733e-06	0.00124987	2.37683e-05	0.0012261	Promoter (<=1kb)	chr10	128884546	128891718	7173	-	14561	uc007hot.1	-5	ENSMUSG00000025352	Gdf11	growth differentiation factor 11
1055	chr10	128896080	128896080	1	*	0.000978154	0.0154443	0.11219	-0.0967461	Distal Intergenic	chr10	128884546	128891718	7173	-	14561	uc007hot.1	-4362	ENSMUSG00000025352	Gdf11	growth differentiation factor 11
1056	chr11	3202637	3202637	1	*	3.78221e-06	0.00642777	0.31304	-0.306612	Promoter (<=1kb)	chr11	3202583	3220678	18096	+	74203	uc007hsd.2	54	ENSMUSG00000020454	Eif4enif1	eukaryotic translation initiation factor 4E nuclear import factor 1
1057	chr11	3202644	3202653	10	*	5.13217e-09	0.00489636	3.52763e-05	0.00486108	Promoter (<=1kb)	chr11	3202583	3220678	18096	+	74203	uc007hsd.2	70	ENSMUSG00000020454	Eif4enif1	eukaryotic translation initiation factor 4E nuclear import factor 1
1058	chr11	3202672	3202676	5	*	5.95558e-08	0.00395399	0.342106	-0.338152	Promoter (<=1kb)	chr11	3202583	3220678	18096	+	74203	uc007hsd.2	93	ENSMUSG00000020454	Eif4enif1	eukaryotic translation initiation factor 4E nuclear import factor 1
1059	chr11	3202677	3202677	1	*	2.5928e-10	0.00385737	2.61004e-05	0.00383127	Promoter (<=1kb)	chr11	3202583	3220678	18096	+	74203	uc007hsd.2	94	ENSMUSG00000020454	Eif4enif1	eukaryotic translation initiation factor 4E nuclear import factor 1
1060	chr11	3202696	3202702	7	*	4.22326e-09	0.00266184	0.346172	-0.34351	Promoter (<=1kb)	chr11	3202583	3220678	18096	+	74203	uc007hsd.2	119	ENSMUSG00000020454	Eif4enif1	eukaryotic translation initiation factor 4E nuclear import factor 1
1061	chr11	3202709	3202724	16	*	4.45566e-08	0.00126357	2.29921e-05	0.00124058	Promoter (<=1kb)	chr11	3202583	3220678	18096	+	74203	uc007hsd.2	141	ENSMUSG00000020454	Eif4enif1	eukaryotic translation initiation factor 4E nuclear import factor 1
1062	chr11	3266195	3266286	92	*	3.7017e-12	0.345113	0.00070199	0.344411	Promoter (<=1kb)	chr11	3249922	3266386	16465	-	13494	uc007hsh.1	100	ENSMUSG00000020457	Drg1	developmentally regulated GTP binding protein 1
1063	chr11	3290265	3290290	26	*	3.68231e-06	0.000601236	2.48793e-05	0.000576414	Promoter (<=1kb)	chr11	3290457	3295424	4968	+	56218	uc007hsm.1	-192	ENSMUSG00000020453	Patz1	POZ (BTB) and AT hook containing zinc finger 1
1064	chr11	3290355	3290363	9	*	3.38117e-06	2.54429e-05	0.00133541	-0.00130997	Promoter (<=1kb)	chr11	3290457	3295424	4968	+	56218	uc007hsm.1	-102	ENSMUSG00000020453	Patz1	POZ (BTB) and AT hook containing zinc finger 1
1065	chr11	3290379	3290381	3	*	1.64593e-09	0.341957	0.00162792	0.340329	Promoter (<=1kb)	chr11	3290457	3295424	4968	+	56218	uc007hsm.1	-78	ENSMUSG00000020453	Patz1	POZ (BTB) and AT hook containing zinc finger 1
1066	chr11	3290386	3290386	1	*	2.59252e-06	2.74591e-05	0.00177239	-0.00174493	Promoter (<=1kb)	chr11	3290457	3295424	4968	+	56218	uc007hsm.1	-71	ENSMUSG00000020453	Patz1	POZ (BTB) and AT hook containing zinc finger 1
1067	chr11	3290387	3290387	1	*	3.29682e-09	0.340657	0.00180148	0.338856	Promoter (<=1kb)	chr11	3290457	3295424	4968	+	56218	uc007hsm.1	-70	ENSMUSG00000020453	Patz1	POZ (BTB) and AT hook containing zinc finger 1
1068	chr11	3290389	3290389	1	*	2.56099e-06	2.75318e-05	0.00179028	-0.00176275	Promoter (<=1kb)	chr11	3290457	3295424	4968	+	56218	uc007hsm.1	-68	ENSMUSG00000020453	Patz1	POZ (BTB) and AT hook containing zinc finger 1
1069	chr11	3290402	3290425	24	*	2.77048e-09	0.341397	0.00176671	0.33963	Promoter (<=1kb)	chr11	3290457	3295424	4968	+	56218	uc007hsm.1	-55	ENSMUSG00000020453	Patz1	POZ (BTB) and AT hook containing zinc finger 1
1070	chr11	3408778	3408889	112	*	5.60049e-07	4.35201e-05	0.00271125	-0.00267003	Promoter (<=1kb)	chr11	3343297	3409238	65942	-	16886	uc007hsu.2	349	ENSMUSG00000020451	Limk2	LIM motif-containing protein kinase 2
1071	chr11	3409057	3409097	41	*	2.75672e-06	5.96021e-05	0.00219199	-0.00213239	Promoter (<=1kb)	chr11	3343297	3409238	65942	-	16886	uc007hsu.2	141	ENSMUSG00000020451	Limk2	LIM motif-containing protein kinase 2
1072	chr11	3539226	3539274	49	*	1.25058e-05	6.72194e-05	0.004089	-0.00402383	Promoter (<=1kb)	chr11	3517522	3539292	21771	-	29856	uc007htf.2	18	ENSMUSG00000020439	Smtn	smoothelin
1073	chr11	3913904	3913911	8	*	1.2709e-05	2.31454e-05	0.000626459	-0.000603314	Promoter (<=1kb)	chr11	3907022	3914664	7643	-	103710	uc007htv.1	753	ENSMUSG00000048807	Slc35e4	solute carrier family 35, member E4
1074	chr11	3913936	3914012	77	*	1.41186e-12	0.345036	0.000550597	0.344433	Promoter (<=1kb)	chr11	3907022	3914664	7643	-	103710	uc007htv.1	652	ENSMUSG00000048807	Slc35e4	solute carrier family 35, member E4
1075	chr11	4135395	4135395	1	*	1.45261e-05	0.000551952	2.49391e-05	0.000527012	Promoter (<=1kb)	chr11	4135160	4141192	6033	+	71673	uc007hui.1	235	ENSMUSG00000003581	Rnf215	ring finger protein 215
1076	chr11	4160438	4160510	73	*	9.49879e-06	4.44248e-05	0.00136663	-0.00132221	Promoter (<=1kb)	chr11	4160354	4171913	11560	+	67465	uc007huo.2	156	ENSMUSG00000002129	Sf3a1	splicing factor 3a, subunit 1
1077	chr11	4308632	4308674	43	*	8.69062e-05	0.372677	0.518356	-0.145678	Distal Intergenic	chr11	4266796	4272514	5719	+	16878	uc007huu.2	41878	ENSMUSG00000034394	Lif	leukemia inhibitory factor
1078	chr11	4594402	4594439	38	*	2.2481e-07	0.000939965	2.3054e-05	0.000916911	Promoter (<=1kb)	chr11	4480868	4594815	113948	-	74302	uc007hux.1	376	ENSMUSG00000034354	Mtmr3	myotubularin related protein 3
1079	chr11	4594828	4594849	22	*	6.27223e-12	0.344811	0.000846973	0.343933	Promoter (<=1kb)	chr11	4480868	4594815	113948	-	74302	uc007hux.1	-13	ENSMUSG00000034354	Mtmr3	myotubularin related protein 3
1080	chr11	5099621	5099695	75	*	6.08438e-11	0.340533	0.00112449	0.339403	Promoter (<=1kb)	chr11	5099748	5106100	6353	+	279766	uc011xrc.2	-127	ENSMUSG00000034175	Rhbdd3	rhomboid domain containing 3
1081	chr11	5520542	5520542	1	*	1.00351e-07	0.00193969	3.93252e-05	0.00190037	Promoter (<=1kb)	chr11	5520641	5525993	5353	+	22433	uc007hwm.2	-99	ENSMUSG00000020484	Xbp1	X-box binding protein 1
1082	chr11	5520816	5520832	17	*	8.56133e-12	0.345806	0.000780678	0.345025	Promoter (<=1kb)	chr11	5520641	5525993	5353	+	22433	uc007hwm.2	191	ENSMUSG00000020484	Xbp1	X-box binding protein 1
1083	chr11	5520923	5520944	22	*	4.13717e-07	2.36177e-05	0.0018919	-0.00186829	Promoter (<=1kb)	chr11	5520641	5525993	5353	+	22433	uc007hwm.2	303	ENSMUSG00000020484	Xbp1	X-box binding protein 1
1084	chr11	5521024	5521033	10	*	3.79622e-14	0.346336	0.000341818	0.345995	Promoter (<=1kb)	chr11	5520641	5525993	5353	+	22433	uc007hwm.2	392	ENSMUSG00000020484	Xbp1	X-box binding protein 1
1085	chr11	5541823	5541901	79	*	5.55052e-10	0.00169576	0.339417	-0.337436	Promoter (<=1kb)	chr11	5528888	5542217	13330	-	104479	uc007hwp.2	316	ENSMUSG00000020482	Ccdc117	coiled-coil domain containing 117
1086	chr11	5541987	5541994	8	*	1.83836e-05	0.239683	0.00454848	0.235134	Promoter (<=1kb)	chr11	5528888	5542217	13330	-	104479	uc007hwp.2	223	ENSMUSG00000020482	Ccdc117	coiled-coil domain containing 117
1087	chr11	5542008	5542011	4	*	0.000470442	0.000131123	0.00301968	-0.00288856	Promoter (<=1kb)	chr11	5528888	5542217	13330	-	104479	uc007hwp.2	206	ENSMUSG00000020482	Ccdc117	coiled-coil domain containing 117
1088	chr11	5542031	5542032	2	*	2.75456e-08	0.298612	0.0020868	0.296525	Promoter (<=1kb)	chr11	5528888	5542217	13330	-	104479	uc007hwp.2	185	ENSMUSG00000020482	Ccdc117	coiled-coil domain containing 117
1089	chr11	5542042	5542042	1	*	4.42624e-05	5.85372e-05	0.00180485	-0.00174632	Promoter (<=1kb)	chr11	5528888	5542217	13330	-	104479	uc007hwp.2	175	ENSMUSG00000020482	Ccdc117	coiled-coil domain containing 117
1090	chr11	5542043	5542043	1	*	6.90249e-09	0.308996	0.00178592	0.30721	Promoter (<=1kb)	chr11	5528888	5542217	13330	-	104479	uc007hwp.2	174	ENSMUSG00000020482	Ccdc117	coiled-coil domain containing 117
1091	chr11	5542046	5542046	1	*	3.4575e-05	5.30854e-05	0.00164623	-0.00159315	Promoter (<=1kb)	chr11	5528888	5542217	13330	-	104479	uc007hwp.2	171	ENSMUSG00000020482	Ccdc117	coiled-coil domain containing 117
1092	chr11	5542070	5542070	1	*	9.86785e-12	0.33445	0.000679412	0.333771	Promoter (<=1kb)	chr11	5528888	5542217	13330	-	104479	uc007hwp.2	147	ENSMUSG00000020482	Ccdc117	coiled-coil domain containing 117
1093	chr11	5542078	5542082	5	*	0.000152322	3.06676e-05	0.000585197	-0.000554529	Promoter (<=1kb)	chr11	5528888	5542217	13330	-	104479	uc007hwp.2	135	ENSMUSG00000020482	Ccdc117	coiled-coil domain containing 117
1094	chr11	5542084	5542084	1	*	2.20343e-12	0.337605	0.00055758	0.337047	Promoter (<=1kb)	chr11	5528888	5542217	13330	-	104479	uc007hwp.2	133	ENSMUSG00000020482	Ccdc117	coiled-coil domain containing 117
1095	chr11	5741073	5741220	148	*	3.38717e-05	0.00316321	9.70792e-05	0.00313249	Promoter (<=1kb)	chr11	5713417	5741176	27760	-	72046	uc007hwu.1	0	ENSMUSG00000049680	Urgcp	upregulator of cell proliferation
1096	chr11	5878308	5878352	45	*	1.24611e-06	0.004151	0.318329	-0.314178	Promoter (<=1kb)	chr11	5872180	5878256	6077	-	18972	uc007hxk.2	-52	ENSMUSG00000020471	Pold2	polymerase (DNA directed), delta 2, regulatory subunit
1097	chr11	5955654	5955677	24	*	3.5742e-11	0.345968	0.00106288	0.344905	Promoter (<=1kb)	chr11	5955758	5967781	12024	+	56418	uc007hxp.3	-104	ENSMUSG00000002741	Ykt6	YKT6 homolog (S. Cerevisiae)
1098	chr11	6291753	6291753	1	*	0.000775921	0.00437484	0.108659	-0.104284	Promoter (<=1kb)	chr11	6291597	6359094	67498	+	18293	uc007hyf.2	156	ENSMUSG00000020456	Ogdh	oxoglutarate (alpha-ketoglutarate) dehydrogenase (lipoamide)
1099	chr11	6291920	6291996	77	*	4.00665e-11	0.344169	0.00121564	0.342941	Promoter (<=1kb)	chr11	6291597	6359094	67498	+	18293	uc007hyf.2	399	ENSMUSG00000020456	Ogdh	oxoglutarate (alpha-ketoglutarate) dehydrogenase (lipoamide)
1100	chr11	6444383	6444449	67	*	4.97165e-08	0.00144032	2.31165e-05	0.00141721	Promoter (<=1kb)	chr11	6427226	6444443	17218	-	77605	uc007hyp.2	0	ENSMUSG00000041126	H2afv	H2A histone family, member V
1101	chr11	6444530	6444530	1	*	0.00634077	0.000348119	0.00514701	-0.00479889	Promoter (<=1kb)	chr11	6427226	6444443	17218	-	77605	uc007hyp.2	-87	ENSMUSG00000041126	H2afv	H2A histone family, member V
1102	chr11	6475847	6475874	28	*	1.74319e-10	0.00205994	2.33978e-05	0.00203654	Promoter (<=1kb)	chr11	6467599	6476076	8478	-	19291	uc007hyr.3	202	ENSMUSG00000094483	Purb	purine rich element binding protein B
1103	chr11	6475911	6475911	1	*	5.71649e-14	0.000378441	0.347328	-0.346949	Promoter (<=1kb)	chr11	6467599	6476076	8478	-	19291	uc007hyr.3	165	ENSMUSG00000094483	Purb	purine rich element binding protein B
1104	chr11	6475914	6475918	5	*	7.70521e-05	0.000351944	2.29984e-05	0.000328945	Promoter (<=1kb)	chr11	6467599	6476076	8478	-	19291	uc007hyr.3	158	ENSMUSG00000094483	Purb	purine rich element binding protein B
1105	chr11	6475923	6475923	1	*	1.47573e-14	0.000310808	0.347351	-0.34704	Promoter (<=1kb)	chr11	6467599	6476076	8478	-	19291	uc007hyr.3	153	ENSMUSG00000094483	Purb	purine rich element binding protein B
1106	chr11	6475927	6475927	1	*	0.000154724	0.00028459	2.29822e-05	0.000261608	Promoter (<=1kb)	chr11	6467599	6476076	8478	-	19291	uc007hyr.3	149	ENSMUSG00000094483	Purb	purine rich element binding protein B
1107	chr11	6475929	6475949	21	*	8.45991e-16	0.000197047	0.347056	-0.346896	Promoter (<=1kb)	chr11	6467599	6476076	8478	-	19291	uc007hyr.3	127	ENSMUSG00000094483	Purb	purine rich element binding protein B
1108	chr11	6625757	6625866	110	*	0.000682092	0.208024	0.0091074	0.198477	Promoter (<=1kb)	chr11	6615598	6626067	10470	-	21379	uc007hyz.2	201	ENSMUSG00000000384	Tbrg4	transforming growth factor beta regulated gene 4
1109	chr11	6626037	6626082	46	*	9.89666e-08	2.44972e-05	0.00107385	-0.00104935	Promoter (<=1kb)	chr11	6615598	6626067	10470	-	21379	uc007hyz.2	0	ENSMUSG00000000384	Tbrg4	transforming growth factor beta regulated gene 4
1110	chr11	6626170	6626171	2	*	4.39824e-13	0.343629	0.000462374	0.343167	Promoter (<=1kb)	chr11	6615598	6626067	10470	-	21379	uc007hyz.2	-103	ENSMUSG00000000384	Tbrg4	transforming growth factor beta regulated gene 4
1111	chr11	7063267	7063296	30	*	3.06171e-05	9.88607e-05	0.00432884	-0.00410049	Promoter (<=1kb)	chr11	7063489	7178505	115017	+	432530	uc007hzf.1	-222	ENSMUSG00000020431	Adcy1	adenylate cyclase 1
1112	chr11	7063639	7063746	108	*	3.76042e-08	0.0025551	0.31467	-0.312233	Promoter (<=1kb)	chr11	7063489	7178505	115017	+	432530	uc007hzf.1	257	ENSMUSG00000020431	Adcy1	adenylate cyclase 1
1113	chr11	9011126	9011175	50	*	1.59469e-09	0.345049	0.00194814	0.343101	Promoter (<=1kb)	chr11	8993137	9011191	18055	-	15574	uc007hzp.2	16	ENSMUSG00000020413	Hus1	Hus1 homolog (S. pombe)
1114	chr11	9118431	9118475	45	*	6.59038e-08	0.330145	0.00324968	0.326895	Promoter (<=1kb)	chr11	9118507	9136170	17664	+	22271	uc007hzy.2	-76	ENSMUSG00000020407	Upp1	uridine phosphorylase 1
1115	chr11	16752087	16752120	34	*	9.27656e-08	0.00225314	0.304826	-0.302573	Promoter (<=1kb)	chr11	16752203	16887658	135456	+	13649	uc007ibn.1	-116	ENSMUSG00000020122	Egfr	epidermal growth factor receptor
1116	chr11	17159071	17159071	1	*	0.00135102	0.000231276	0.00505055	-0.00481927	Promoter (<=1kb)	chr11	17159298	17200380	41083	+	19058	uc007ica.1	-227	ENSMUSG00000033953	Ppp3r1	protein phosphatase 3, regulatory subunit B, alpha isoform (calcineurin B, type I)
1117	chr11	17159258	17159258	1	*	1.11128e-05	0.00183703	0.149479	-0.147642	Promoter (<=1kb)	chr11	17159298	17200380	41083	+	19058	uc007ica.1	-40	ENSMUSG00000033953	Ppp3r1	protein phosphatase 3, regulatory subunit B, alpha isoform (calcineurin B, type I)
1118	chr11	17159267	17159277	11	*	1.06853e-06	0.000731212	2.34822e-05	0.000707729	Promoter (<=1kb)	chr11	17159298	17200380	41083	+	19058	uc007ica.1	-31	ENSMUSG00000033953	Ppp3r1	protein phosphatase 3, regulatory subunit B, alpha isoform (calcineurin B, type I)
1119	chr11	17159282	17159282	1	*	7.87651e-13	0.0006059	0.346903	-0.346297	Promoter (<=1kb)	chr11	17159298	17200380	41083	+	19058	uc007ica.1	-16	ENSMUSG00000033953	Ppp3r1	protein phosphatase 3, regulatory subunit B, alpha isoform (calcineurin B, type I)
1120	chr11	17159284	17159284	1	*	1.9457e-06	0.000585403	2.32418e-05	0.000562162	Promoter (<=1kb)	chr11	17159298	17200380	41083	+	19058	uc007ica.1	-14	ENSMUSG00000033953	Ppp3r1	protein phosphatase 3, regulatory subunit B, alpha isoform (calcineurin B, type I)
1121	chr11	17159288	17159293	6	*	3.08826e-13	0.000528401	0.347062	-0.346534	Promoter (<=1kb)	chr11	17159298	17200380	41083	+	19058	uc007ica.1	-10	ENSMUSG00000033953	Ppp3r1	protein phosphatase 3, regulatory subunit B, alpha isoform (calcineurin B, type I)
1122	chr11	17159491	17159498	8	*	0.000113186	0.0076224	0.00029789	0.00732451	Promoter (<=1kb)	chr11	17159298	17200380	41083	+	19058	uc007ica.1	200	ENSMUSG00000033953	Ppp3r1	protein phosphatase 3, regulatory subunit B, alpha isoform (calcineurin B, type I)
1123	chr11	17159647	17159732	86	*	2.22432e-07	4.63422e-05	0.00965991	-0.00956296	Promoter (<=1kb)	chr11	17159298	17200380	41083	+	19058	uc007ica.1	434	ENSMUSG00000033953	Ppp3r1	protein phosphatase 3, regulatory subunit B, alpha isoform (calcineurin B, type I)
1124	chr11	17211271	17211328	58	*	2.81981e-09	0.336405	0.000993263	0.335412	Promoter (<=1kb)	chr11	17203200	17211589	8390	-	66249	uc007icc.1	261	ENSMUSG00000020116	Pno1	partner of NOB1 homolog (S. cerevisiae)
1125	chr11	17211387	17211415	29	*	2.82999e-12	0.000632961	0.345165	-0.344486	Promoter (<=1kb)	chr11	17203200	17211589	8390	-	66249	uc007icc.1	174	ENSMUSG00000020116	Pno1	partner of NOB1 homolog (S. cerevisiae)
1126	chr11	17211416	17211416	1	*	2.79922e-05	0.000641678	2.46059e-05	0.000617072	Promoter (<=1kb)	chr11	17203200	17211589	8390	-	66249	uc007icc.1	173	ENSMUSG00000020116	Pno1	partner of NOB1 homolog (S. cerevisiae)
1127	chr11	17211431	17211432	2	*	2.13539e-11	0.000807667	0.343023	-0.342216	Promoter (<=1kb)	chr11	17203200	17211589	8390	-	66249	uc007icc.1	157	ENSMUSG00000020116	Pno1	partner of NOB1 homolog (S. cerevisiae)
1128	chr11	17211440	17211443	4	*	1.86953e-05	0.000960866	2.74197e-05	0.000933447	Promoter (<=1kb)	chr11	17203200	17211589	8390	-	66249	uc007icc.1	146	ENSMUSG00000020116	Pno1	partner of NOB1 homolog (S. cerevisiae)
1129	chr11	17211444	17211446	3	*	1.08857e-10	0.00101089	0.340408	-0.339397	Promoter (<=1kb)	chr11	17203200	17211589	8390	-	66249	uc007icc.1	143	ENSMUSG00000020116	Pno1	partner of NOB1 homolog (S. cerevisiae)
1130	chr11	18877840	18877881	42	*	2.14168e-08	0.00332336	0.335089	-0.331766	Distal Intergenic	chr11	18880428	19018969	138542	-	17268	uc007icl.2	141088	ENSMUSG00000020160	Meis1	Meis homeobox 1
1131	chr11	19020621	19020667	47	*	7.24617e-06	0.320195	0.00943656	0.310758	Promoter (1-2kb)	chr11	18880428	19018969	138542	-	17268	uc007icl.2	-1652	ENSMUSG00000020160	Meis1	Meis homeobox 1
1132	chr11	19920126	19920187	62	*	5.15278e-09	0.0106523	4.94685e-05	0.0106028	Distal Intergenic	chr11	19924442	20019086	94645	+	114716	uc007icq.1	-4316	ENSMUSG00000045671	Spred2	sprouty-related, EVH1 domain containing 2
1133	chr11	19920299	19920312	14	*	3.16927e-08	0.00314168	0.340669	-0.337527	Distal Intergenic	chr11	19924442	20019086	94645	+	114716	uc007icq.1	-4143	ENSMUSG00000045671	Spred2	sprouty-related, EVH1 domain containing 2
1134	chr11	20112402	20112452	51	*	0.00503128	0.0136133	0.23372	-0.220107	Promoter (<=1kb)	chr11	20062304	20112951	50648	-	66713	uc011xrw.1	499	ENSMUSG00000020152	Actr2	ARP2 actin-related protein 2
1135	chr11	20112550	20112607	58	*	2.386e-14	0.346664	0.000336552	0.346328	Promoter (<=1kb)	chr11	20062304	20112951	50648	-	66713	uc011xrw.1	344	ENSMUSG00000020152	Actr2	ARP2 actin-related protein 2
1136	chr11	20113073	20113230	158	*	1.89483e-06	5.1707e-05	0.00309511	-0.0030434	Promoter (<=1kb)	chr11	20062304	20112951	50648	-	66713	uc011xrw.1	-122	ENSMUSG00000020152	Actr2	ARP2 actin-related protein 2
1137	chr11	20332829	20332928	100	*	8.69306e-06	0.275839	0.00604606	0.269607	Promoter (<=1kb)	chr11	20302180	20332713	30534	-	55963	uc007idb.2	-116	ENSMUSG00000020142	Slc1a4	solute carrier family 1 (glutamate/neutral amino acid transporter), member 4
1138	chr11	20542613	20542613	1	*	3.05883e-11	0.00094227	0.345393	-0.344451	Promoter (<=1kb)	chr11	20543253	20653023	109771	+	58172	uc007idc.1	-640	ENSMUSG00000049800	Sertad2	SERTA domain containing 2
1139	chr11	20542626	20542626	1	*	1.04389e-05	0.000697969	2.37024e-05	0.000674267	Promoter (<=1kb)	chr11	20543253	20653023	109771	+	58172	uc007idc.1	-627	ENSMUSG00000049800	Sertad2	SERTA domain containing 2
1140	chr11	20542629	20542656	28	*	3.2876e-13	0.000490844	0.346948	-0.346457	Promoter (<=1kb)	chr11	20543253	20653023	109771	+	58172	uc007idc.1	-624	ENSMUSG00000049800	Sertad2	SERTA domain containing 2
1141	chr11	20542831	20542831	1	*	0.00115223	2.44718e-05	0.000195987	-0.000171515	Promoter (<=1kb)	chr11	20543253	20653023	109771	+	58172	uc007idc.1	-422	ENSMUSG00000049800	Sertad2	SERTA domain containing 2
1142	chr11	20543278	20543331	54	*	4.11089e-08	0.00304755	0.322357	-0.319309	Promoter (<=1kb)	chr11	20543253	20653023	109771	+	58172	uc007idc.1	78	ENSMUSG00000049800	Sertad2	SERTA domain containing 2
1143	chr11	20741070	20741200	131	*	1.34825e-07	0.31843	0.00360468	0.314825	Promoter (<=1kb)	chr11	20685085	20741556	56472	-	216549	uc007idh.3	356	ENSMUSG00000049659	Aftph	aftiphilin
1144	chr11	21091687	21091983	297	*	5.24752e-09	0.342557	0.00261388	0.340144	Promoter (<=1kb)	chr11	21092118	21149402	57285	+	67245	uc007idm.1	-431	ENSMUSG00000020134	Peli1	pellino 1
1145	chr11	21239487	21239553	67	*	1.77751e-06	0.0051799	0.329053	-0.323873	Promoter (<=1kb)	chr11	21239032	21321133	82102	+	245944	uc007ido.3	521	ENSMUSG00000020128	Vps54	vacuolar protein sorting 54 (yeast)
1146	chr11	21371136	21371177	42	*	1.04824e-06	5.00955e-05	0.00446318	-0.00441237	Promoter (<=1kb)	chr11	21321126	21371267	50142	-	216558	uc007idt.4	90	ENSMUSG00000001891	Ugp2	UDP-glucose pyrophosphorylase 2
1147	chr11	21997999	21998004	6	*	0.000522077	0.0887959	0.267399	-0.178603	Intron (uc007idy.1/18423, intron 1 of 4)	chr11	21994764	22001651	6888	-	18423	uc007idy.1	3647	ENSMUSG00000005917	Otx1	orthodenticle homolog 1
1148	chr11	22001986	22002147	162	*	1.28016e-05	0.00726852	0.366437	-0.358945	Promoter (<=1kb)	chr11	21994764	22001651	6888	-	18423	uc007idy.1	-335	ENSMUSG00000005917	Otx1	orthodenticle homolog 1
1149	chr11	22512582	22512630	49	*	3.66316e-07	0.000884073	2.32942e-05	0.000860779	Promoter (<=1kb)	chr11	22512283	22519231	6949	+	103765	uc007iee.1	347	ENSMUSG00000049904	Tmem17	transmembrane protein 17
1150	chr11	23067808	23067849	42	*	8.522e-13	0.341502	0.000596001	0.340906	Distal Intergenic	chr11	23020000	23030788	10789	+	73873	uc007ies.1	47849	ENSMUSG00000049811	Fam161a	family with sequence similarity 161, member A
1151	chr11	23255504	23255504	1	*	0.00061033	0.0113601	0.230914	-0.219554	Promoter (<=1kb)	chr11	23256041	23297597	41557	+	103573	uc007iet.1	-537	ENSMUSG00000020290	Xpo1	exportin 1, CRM1 homolog (yeast)
1152	chr11	23255924	23255924	1	*	0.000896191	0.000149331	0.00272806	-0.00257873	Promoter (<=1kb)	chr11	23256041	23297597	41557	+	103573	uc007iet.1	-117	ENSMUSG00000020290	Xpo1	exportin 1, CRM1 homolog (yeast)
1153	chr11	23256205	23256350	146	*	1.18157e-06	0.066377	0.00229837	0.0633321	Promoter (<=1kb)	chr11	23256041	23297597	41557	+	103573	uc007iet.1	309	ENSMUSG00000020290	Xpo1	exportin 1, CRM1 homolog (yeast)
1154	chr11	23256432	23256432	1	*	0.00286895	0.0155337	0.203446	-0.187913	Promoter (<=1kb)	chr11	23256041	23297597	41557	+	103573	uc007iet.1	391	ENSMUSG00000020290	Xpo1	exportin 1, CRM1 homolog (yeast)
1155	chr11	23306797	23306836	40	*	3.13931e-07	2.49375e-05	0.00115745	-0.00113251	Promoter (<=1kb)	chr11	23306895	23364512	57618	+	17847	uc011xsc.2	-98	ENSMUSG00000056342	Usp34	ubiquitin specific peptidase 34
1156	chr11	23307150	23307203	54	*	0.000563547	0.0493774	0.00115705	0.0482141	Promoter (<=1kb)	chr11	23306895	23364512	57618	+	17847	uc011xsc.2	308	ENSMUSG00000056342	Usp34	ubiquitin specific peptidase 34
1157	chr11	23665580	23665580	1	*	1.47738e-05	5.44015e-05	0.00509358	-0.00503918	Promoter (<=1kb)	chr11	23665674	23732876	67203	+	74467	uc007ifk.1	-94	ENSMUSG00000020280	Pus10	pseudouridylate synthase 10
1158	chr11	23665591	23665761	171	*	3.83017e-07	0.322749	0.00330003	0.320524	Promoter (<=1kb)	chr11	23665674	23732876	67203	+	74467	uc007ifk.1	0	ENSMUSG00000020280	Pus10	pseudouridylate synthase 10
1159	chr11	23894812	23894869	58	*	6.61183e-05	2.32655e-05	0.000401589	-0.000378324	Promoter (<=1kb)	chr11	23862646	23895270	32625	-	216578	uc007ifp.2	401	ENSMUSG00000020273	Papolg	poly(A) polymerase gamma
1160	chr11	24076668	24076715	48	*	1.1194e-07	3.2484e-05	0.00475759	-0.00472816	Promoter (1-2kb)	chr11	24078056	24090906	12851	+	14025	uc007ifs.2	-1388	ENSMUSG00000000861	Bcl11a	B cell CLL/lymphoma 11A (zinc finger protein)
1161	chr11	24461477	24461478	2	*	0.000612503	0.576882	0.688529	-0.111648	Distal Intergenic	chr11	24481909	24569951	88043	+	71316	uc029rkx.1	-20432	ENSMUSG00000086892	4933430M04Rik	RIKEN cDNA 4933430M04 gene
1162	chr11	26210294	26210323	30	*	1.45171e-06	0.390489	0.00690454	0.383831	Promoter (<=1kb)	chr11	25616846	26210576	593731	-	70626	uc011xsi.1	253	#N/A	5730522E02Rik	RIKEN cDNA 5730522E02 gene
1163	chr11	26210442	26210461	20	*	2.62328e-12	0.000739156	0.345722	-0.344983	Promoter (<=1kb)	chr11	25616846	26210576	593731	-	70626	uc011xsi.1	115	#N/A	5730522E02Rik	RIKEN cDNA 5730522E02 gene
1164	chr11	26593597	26593597	1	*	0.000152607	0.189789	0.00413676	0.185652	Promoter (<=1kb)	chr11	26471402	26593920	122519	-	69922	uc007igf.2	323	ENSMUSG00000064090	Vrk2	vaccinia related kinase 2
1165	chr11	26593771	26593817	47	*	1.93915e-06	0.0100469	0.000113355	0.00993354	Promoter (<=1kb)	chr11	26471402	26593920	122519	-	69922	uc007igf.2	103	ENSMUSG00000064090	Vrk2	vaccinia related kinase 2
1166	chr11	29526247	29526310	64	*	1.62301e-06	0.000225162	0.0288226	-0.0285945	Promoter (<=1kb)	chr11	29526397	29545447	19051	+	76784	uc007ihc.2	-150	ENSMUSG00000020459	Mtif2	mitochondrial translational initiation factor 2
1167	chr11	29526390	29526462	73	*	3.93623e-09	0.33348	0.00176604	0.331714	Promoter (<=1kb)	chr11	29526397	29545447	19051	+	76784	uc007ihc.2	0	ENSMUSG00000020459	Mtif2	mitochondrial translational initiation factor 2
1168	chr11	29693060	29693134	75	*	3.75748e-06	0.00513586	7.15088e-05	0.00506435	Promoter (<=1kb)	chr11	29692898	29744414	51517	+	68585	uc007ihk.2	236	ENSMUSG00000020458	Rtn4	reticulon 4
1169	chr11	29693327	29693330	4	*	1.82534e-06	2.57318e-05	0.000686997	-0.000661265	Promoter (<=1kb)	chr11	29692898	29744414	51517	+	68585	uc007ihk.2	432	ENSMUSG00000020458	Rtn4	reticulon 4
1170	chr11	29693369	29693375	7	*	1.98289e-11	0.33082	0.00082528	0.329994	Promoter (<=1kb)	chr11	29693774	29744414	50641	+	68585	uc007ihn.2	-405	ENSMUSG00000020458	Rtn4	reticulon 4
1171	chr11	29693401	29693472	72	*	1.40333e-08	2.99941e-05	0.00208628	-0.00206072	Promoter (<=1kb)	chr11	29693774	29744414	50641	+	68585	uc007ihn.2	-373	ENSMUSG00000020458	Rtn4	reticulon 4
1172	chr11	29693546	29693662	117	*	1.39996e-06	0.00137748	3.06988e-05	0.00134678	Promoter (<=1kb)	chr11	29693774	29744414	50641	+	68585	uc007ihn.2	-228	ENSMUSG00000020458	Rtn4	reticulon 4
1173	chr11	30267669	30267669	1	*	4.46402e-08	2.47267e-05	0.00215569	-0.00213097	Intron (uc007ihu.1/uc007ihu.1, intron 1 of 1)	chr11	30099395	30219772	120378	-	20742	uc007ihs.1	-47897	ENSMUSG00000020315	Sptbn1	spectrin beta, non-erythrocytic 1
1174	chr11	30267677	30267718	42	*	4.43261e-08	0.340887	0.0032438	0.337643	Intron (uc007ihu.1/uc007ihu.1, intron 1 of 1)	chr11	30099395	30219772	120378	-	20742	uc007ihs.1	-47905	ENSMUSG00000020315	Sptbn1	spectrin beta, non-erythrocytic 1
1175	chr11	30267728	30267729	2	*	4.25149e-08	3.2015e-05	0.00452309	-0.00449107	Intron (uc007ihu.1/uc007ihu.1, intron 1 of 1)	chr11	30099395	30219772	120378	-	20742	uc007ihs.1	-47956	ENSMUSG00000020315	Sptbn1	spectrin beta, non-erythrocytic 1
1176	chr11	30267733	30267757	25	*	3.50632e-07	0.335913	0.00448597	0.33143	Intron (uc007ihu.1/uc007ihu.1, intron 1 of 1)	chr11	30099395	30219772	120378	-	20742	uc007ihs.1	-47961	ENSMUSG00000020315	Sptbn1	spectrin beta, non-erythrocytic 1
1177	chr11	30267758	30267758	1	*	2.97557e-08	3.05307e-05	0.0044826	-0.00445207	Intron (uc007ihu.1/uc007ihu.1, intron 1 of 1)	chr11	30099395	30219772	120378	-	20742	uc007ihs.1	-47986	ENSMUSG00000020315	Sptbn1	spectrin beta, non-erythrocytic 1
1178	chr11	30267763	30267768	6	*	2.44927e-07	0.338228	0.0042993	0.333929	Intron (uc007ihu.1/uc007ihu.1, intron 1 of 1)	chr11	30099395	30219772	120378	-	20742	uc007ihs.1	-47991	ENSMUSG00000020315	Sptbn1	spectrin beta, non-erythrocytic 1
1179	chr11	31371511	31371546	36	*	1.21969e-07	0.529702	0.667734	-0.1322	Promoter (1-2kb)	chr11	31359441	31370061	10621	-	20856	uc007iik.1	-1450	ENSMUSG00000020303	Stc2	stanniocalcin 2
1180	chr11	31671592	31671601	10	*	0.000587781	0.00520415	0.000235564	0.00496859	Promoter (<=1kb)	chr11	31665150	31671862	6713	-	69556	uc007iim.1	261	ENSMUSG00000044502	Bod1	biorientation of chromosomes in cell division 1
1181	chr11	31671826	31671869	44	*	2.91914e-05	0.00316047	7.64675e-05	0.003084	Promoter (<=1kb)	chr11	31665150	31671862	6713	-	69556	uc007iim.1	0	ENSMUSG00000044502	Bod1	biorientation of chromosomes in cell division 1
1182	chr11	31870346	31870356	11	*	2.35549e-07	0.0115957	6.60482e-05	0.0115296	Promoter (<=1kb)	chr11	31870940	31935635	64696	+	67579	uc007iir.2	-594	ENSMUSG00000020300	Cpeb4	cytoplasmic polyadenylation element binding protein 4
1183	chr11	31870357	31870357	1	*	8.09944e-05	0.0103515	0.301877	-0.291526	Promoter (<=1kb)	chr11	31870940	31935635	64696	+	67579	uc007iir.2	-583	ENSMUSG00000020300	Cpeb4	cytoplasmic polyadenylation element binding protein 4
1184	chr11	31870496	31870496	1	*	4.20499e-05	0.00028104	0.0181843	-0.0179032	Promoter (<=1kb)	chr11	31870940	31935635	64696	+	67579	uc007iir.2	-444	ENSMUSG00000020300	Cpeb4	cytoplasmic polyadenylation element binding protein 4
1185	chr11	32347786	32347786	1	*	1.00076e-10	0.00429523	2.3322e-05	0.00427191	Promoter (<=1kb)	chr11	32347811	32390332	42522	+	268396	uc007ijo.1	-25	ENSMUSG00000040711	Sh3pxd2b	SH3 and PX domains 2B
1186	chr11	32347834	32347906	73	*	1.50065e-09	0.00193329	0.343586	-0.34156	Promoter (<=1kb)	chr11	32347811	32390332	42522	+	268396	uc007ijo.1	95	ENSMUSG00000040711	Sh3pxd2b	SH3 and PX domains 2B
1187	chr11	33147431	33147465	35	*	1.02639e-06	0.0066863	4.74917e-05	0.00663881	Promoter (<=1kb)	chr11	33116978	33147400	30423	-	14172	uc007ikc.2	-31	ENSMUSG00000057967	Fgf18	fibroblast growth factor 18
1188	chr11	33147952	33147980	29	*	0.000509695	0.000973636	4.24926e-05	0.000931144	Promoter (<=1kb)	chr11	33116978	33147400	30423	-	14172	uc007ikc.2	-552	ENSMUSG00000057967	Fgf18	fibroblast growth factor 18
1189	chr11	33873588	33873589	2	*	0.000712974	0.970537	0.74672	0.223816	Intron (uc007ikr.2/70357, intron 7 of 7)	chr11	33629341	33843585	214245	-	70357	uc007iko.2	-30003	ENSMUSG00000053519	Kcnip1	Kv channel-interacting protein 1
1190	chr11	36027404	36027404	1	*	0.00122171	0.826041	0.903964	-0.0779236	Exon (uc007ilk.2/23964, exon 26 of 29)	chr11	35839178	35980089	140912	-	211652	uc007ili.1	-47315	ENSMUSG00000018849	Wwc1	WW, C2 and coiled-coil domain containing 1
1191	chr11	40734100	40734118	19	*	0.000274128	0.19247	0.00657085	0.185899	Promoter (<=1kb)	chr11	40733661	40740046	6386	+	52653	uc007ily.3	457	ENSMUSG00000020328	Nudcd2	NudC domain containing 2
1192	chr11	43682242	43682455	214	*	4.55035e-08	0.0030666	0.324778	-0.321478	Promoter (<=1kb)	chr11	43681998	43707193	25196	+	70802	uc007imu.2	457	ENSMUSG00000044950	Pwwp2a	PWWP domain containing 2A
1193	chr11	43682506	43682511	6	*	7.59573e-06	0.227392	0.000944707	0.226447	Promoter (<=1kb)	chr11	43681998	43707193	25196	+	70802	uc007imu.2	513	ENSMUSG00000044950	Pwwp2a	PWWP domain containing 2A
1194	chr11	44470326	44470349	24	*	3.70056e-05	0.289319	0.00729286	0.281818	Promoter (<=1kb)	chr11	44454571	44470548	15978	-	79560	uc007ing.2	199	ENSMUSG00000041231	Ublcp1	ubiquitin-like domain containing CTD phosphatase 1
1195	chr11	44470632	44470632	1	*	3.55014e-05	0.23985	0.00554339	0.234307	Promoter (<=1kb)	chr11	44454571	44470548	15978	-	79560	uc007ing.2	-84	ENSMUSG00000041231	Ublcp1	ubiquitin-like domain containing CTD phosphatase 1
1196	chr11	44618280	44618307	28	*	1.07463e-08	6.17393e-05	0.0107657	-0.010704	Promoter (<=1kb)	chr11	44618100	44646820	28721	+	13591	uc007inj.2	207	ENSMUSG00000057098	Ebf1	early B cell factor 1
1197	chr11	45944708	45944874	167	*	9.20718e-08	0.302091	0.00294872	0.299143	Promoter (<=1kb)	chr11	45928269	45944935	16667	-	72290	uc007ins.1	61	ENSMUSG00000044847	Lsm11	U7 snRNP-specific Sm-like protein LSM11
1198	chr11	46437214	46437214	1	*	2.46571e-09	2.88833e-05	0.00886188	-0.008833	Promoter (<=1kb)	chr11	46436961	46442721	5761	+	66213	uc007iol.2	253	ENSMUSG00000020397	Med7	mediator complex subunit 7
1199	chr11	46437218	46437255	38	*	1.46587e-06	0.343978	0.00632556	0.337652	Promoter (<=1kb)	chr11	46436961	46442721	5761	+	66213	uc007iol.2	294	ENSMUSG00000020397	Med7	mediator complex subunit 7
1200	chr11	46437263	46437263	1	*	2.20659e-09	2.38756e-05	0.00483827	-0.0048144	Promoter (<=1kb)	chr11	46436961	46442721	5761	+	66213	uc007iol.2	302	ENSMUSG00000020397	Med7	mediator complex subunit 7
1201	chr11	48799958	48800007	50	*	5.35581e-07	0.00502457	0.335231	-0.330206	Promoter (<=1kb)	chr11	48800360	48806241	5882	+	14694	uc007ipa.1	-402	ENSMUSG00000020372	Gnb2l1	guanine nucleotide binding protein (G protein), beta polypeptide 2 like 1
1202	chr11	48800037	48800037	1	*	2.44164e-06	0.00833427	8.93882e-05	0.00824488	Promoter (<=1kb)	chr11	48800360	48806241	5882	+	14694	uc007ipa.1	-323	ENSMUSG00000020372	Gnb2l1	guanine nucleotide binding protein (G protein), beta polypeptide 2 like 1
1203	chr11	48800046	48800046	1	*	8.37947e-05	0.00885625	0.277712	-0.268856	Promoter (<=1kb)	chr11	48800360	48806241	5882	+	14694	uc007ipa.1	-314	ENSMUSG00000020372	Gnb2l1	guanine nucleotide binding protein (G protein), beta polypeptide 2 like 1
1204	chr11	48800052	48800054	3	*	1.21716e-05	0.00915604	0.000127412	0.00902863	Promoter (<=1kb)	chr11	48800360	48806241	5882	+	14694	uc007ipa.1	-308	ENSMUSG00000020372	Gnb2l1	guanine nucleotide binding protein (G protein), beta polypeptide 2 like 1
1205	chr11	48817100	48817144	45	*	3.31462e-07	5.90104e-05	0.0083439	-0.00828489	Promoter (<=1kb)	chr11	48806404	48817391	10988	-	211007	uc007ipc.1	247	ENSMUSG00000040365	Trim41	tripartite motif-containing 41
1206	chr11	48849711	48849746	36	*	0.000225991	0.70691	0.834221	-0.127311	Exon (uc007ipd.2/94089, exon 7 of 7)	chr11	48837471	48840593	3123	+	94089	uc011xty.1	12275	ENSMUSG00000040350	Trim7	tripartite motif-containing 7
1207	chr11	49244140	49244230	91	*	4.09797e-05	0.00102218	2.96931e-05	0.000992485	Promoter (<=1kb)	chr11	49244191	49263024	18834	+	17308	uc007iqb.2	0	ENSMUSG00000020346	Mgat1	mannoside acetylglucosaminyltransferase 1
1208	chr11	49250429	49250429	1	*	0.000138335	0.00879281	0.259138	-0.250346	Promoter (<=1kb)	chr11	49250552	49263024	12473	+	17308	uc007iqe.1	-123	ENSMUSG00000020346	Mgat1	mannoside acetylglucosaminyltransferase 1
1209	chr11	49250552	49250552	1	*	0.000658626	0.180286	0.00715308	0.173133	Promoter (<=1kb)	chr11	49250552	49263024	12473	+	17308	uc007iqe.1	0	ENSMUSG00000020346	Mgat1	mannoside acetylglucosaminyltransferase 1
1210	chr11	49590191	49590228	38	*	0.000444591	0.983959	0.799692	0.184542	Distal Intergenic	chr11	49609679	49652739	43061	+	14257	uc007iqu.2	-19488	ENSMUSG00000020357	Flt4	FMS-like tyrosine kinase 4
1211	chr11	49712096	49712096	1	*	1.60179e-09	0.34521	0.00269922	0.342511	Promoter (<=1kb)	chr11	49671497	49712722	41226	-	104625	uc007irb.3	626	ENSMUSG00000020362	Cnot6	CCR4-NOT transcription complex, subunit 6
1212	chr11	49712247	49712321	75	*	3.59592e-09	0.0105476	3.49859e-05	0.0105129	Promoter (<=1kb)	chr11	49671497	49712722	41226	-	104625	uc007irb.3	401	ENSMUSG00000020362	Cnot6	CCR4-NOT transcription complex, subunit 6
1213	chr11	49846757	49846886	130	*	4.17947e-07	4.4616e-05	0.00450182	-0.0044572	Promoter (<=1kb)	chr11	49846751	49873395	26645	+	26420	uc007ird.2	135	ENSMUSG00000020366	Mapk9	mitogen-activated protein kinase 9
1214	chr11	49846887	49846982	96	*	1.45849e-07	0.333864	0.00482313	0.329042	Promoter (<=1kb)	chr11	49846751	49873395	26645	+	26420	uc007ird.2	231	ENSMUSG00000020366	Mapk9	mitogen-activated protein kinase 9
1215	chr11	50174811	50174869	59	*	8.78953e-15	2.41878e-05	0.00513975	-0.00511556	Promoter (<=1kb)	chr11	50174851	50200115	25265	+	68067	uc007irv.2	0	ENSMUSG00000020381	3010026O09Rik	RIKEN cDNA 3010026O09 gene
1216	chr11	50225425	50225431	7	*	9.67437e-05	2.42048e-05	0.000426701	-0.000402496	Promoter (<=1kb)	chr11	50225335	50235103	9769	+	103534	uc007iry.2	96	ENSMUSG00000036620	Mgat4b	mannoside acetylglucosaminyltransferase 4, isoenzyme B
1217	chr11	50225618	50225635	18	*	9.53234e-11	0.0012719	0.345338	-0.344039	Promoter (<=1kb)	chr11	50225335	50235103	9769	+	103534	uc007iry.2	300	ENSMUSG00000036620	Mgat4b	mannoside acetylglucosaminyltransferase 4, isoenzyme B
1218	chr11	50376910	50376958	49	*	1.44504e-06	3.30614e-05	0.00265916	-0.0026261	Promoter (<=1kb)	chr11	50377094	50386528	9435	+	59013	uc007isj.1	-184	ENSMUSG00000007850	Hnrnph1	heterogeneous nuclear ribonucleoprotein H1
1219	chr11	50378089	50378133	45	*	5.14378e-08	2.65424e-05	0.00189786	-0.00187132	Promoter (<=1kb)	chr11	50377719	50386528	8810	+	59013	uc007isk.1	414	ENSMUSG00000007850	Hnrnph1	heterogeneous nuclear ribonucleoprotein H1
1220	chr11	50378460	50378553	94	*	4.03774e-08	4.18342e-05	0.00563884	-0.005597	Promoter (<=1kb)	chr11	50377719	50386528	8810	+	59013	uc007isk.1	834	ENSMUSG00000007850	Hnrnph1	heterogeneous nuclear ribonucleoprotein H1
1221	chr11	50431080	50431128	49	*	3.38737e-06	2.96049e-05	0.00194891	-0.00191969	Promoter (<=1kb)	chr11	50389303	50431111	41809	-	216724	uc007isn.1	0	ENSMUSG00000020375	Rufy1	RUN and FYVE domain containing 1
1222	chr11	50589202	50589237	36	*	0.000420202	0.208441	0.117912	0.0905297	Distal Intergenic	chr11	50602085	50798346	196262	+	216725	uc007isp.2	-12883	ENSMUSG00000036545	Adamts2	a disintegrin-like and metallopeptidase (reprolysin type) with thrombospondin type 1 motif, 2
1223	chr11	50713825	50713825	1	*	6.05636e-06	0.215987	0.354288	-0.1383	Intron (uc007isp.2/216725, intron 3 of 20)	chr11	50602085	50798346	196262	+	216725	uc007isp.2	111740	ENSMUSG00000036545	Adamts2	a disintegrin-like and metallopeptidase (reprolysin type) with thrombospondin type 1 motif, 2
1224	chr11	50827585	50827585	1	*	3.32737e-12	0.343831	0.000639593	0.343191	Promoter (<=1kb)	chr11	50811085	50827731	16647	-	30944	uc007isq.1	146	ENSMUSG00000044807	Zfp354c	zinc finger protein 354C
1225	chr11	50827588	50827588	1	*	3.08879e-05	2.49627e-05	0.000601069	-0.000576106	Promoter (<=1kb)	chr11	50811085	50827731	16647	-	30944	uc007isq.1	143	ENSMUSG00000044807	Zfp354c	zinc finger protein 354C
1226	chr11	50827592	50827612	21	*	7.33966e-13	0.345507	0.000495929	0.345011	Promoter (<=1kb)	chr11	50811085	50827731	16647	-	30944	uc007isq.1	119	ENSMUSG00000044807	Zfp354c	zinc finger protein 354C
1227	chr11	50827622	50827631	10	*	0.000109511	2.3266e-05	0.000330836	-0.00030757	Promoter (<=1kb)	chr11	50811085	50827731	16647	-	30944	uc007isq.1	100	ENSMUSG00000044807	Zfp354c	zinc finger protein 354C
1228	chr11	51584835	51584885	51	*	6.93807e-07	9.93534e-05	0.0122542	-0.0120356	Promoter (<=1kb)	chr11	51584757	51592828	8072	+	72947	uc007itw.1	128	ENSMUSG00000020359	Phykpl	5-phosphohydroxy-L-lysine phospholyase
1229	chr11	51605956	51606006	51	*	0.000319431	0.00644085	0.197664	-0.191224	Promoter (<=1kb)	chr11	51600100	51606881	6782	-	15384	uc007itz.1	875	ENSMUSG00000020358	Hnrnpab	heterogeneous nuclear ribonucleoprotein A/B
1230	chr11	51619835	51619841	7	*	3.60448e-05	4.10851e-05	0.00152215	-0.00148106	Promoter (<=1kb)	chr11	51619773	51623714	3942	+	52530	uc007iuc.1	68	ENSMUSG00000001056	Nhp2	NHP2 ribonucleoprotein
1231	chr11	51755977	51756007	31	*	5.30523e-10	0.00167751	0.342076	-0.340399	Promoter (<=1kb)	chr11	51692263	51756834	64572	-	77371	uc007iui.1	827	ENSMUSG00000036391	Sec24a	Sec24 related gene family, member A (S. cerevisiae)
1232	chr11	51803157	51803174	18	*	2.06335e-07	0.729089	0.87299	-0.143901	Distal Intergenic	chr11	51763663	51791953	28291	+	66397	uc007iup.2	39511	ENSMUSG00000020386	Sar1b	SAR1 gene homolog B (S. cerevisiae)
1233	chr11	51855397	51855451	55	*	0.00421101	0.0162084	0.205195	-0.188986	Promoter (2-3kb)	chr11	51813456	51857481	44026	-	76901	uc007iuq.1	2030	ENSMUSG00000020387	Jade2	jade family PHD finger 2
1234	chr11	51856384	51856487	104	*	2.9113e-13	0.000441031	0.344266	-0.343825	Promoter (<=1kb)	chr11	51813456	51857481	44026	-	76901	uc007iuq.1	994	ENSMUSG00000020387	Jade2	jade family PHD finger 2
1235	chr11	51916781	51916784	4	*	0.000292508	0.000711486	4.27827e-05	0.000668703	Distal Intergenic	chr11	51967631	51977336	9706	+	52626	uc007ius.2	-50850	ENSMUSG00000020392	Cdkn2aipnl	CDKN2A interacting protein N-terminal like
1236	chr11	51916888	51916888	1	*	0.000687881	0.00580496	0.000276231	0.00552873	Distal Intergenic	chr11	51967631	51977336	9706	+	52626	uc007ius.2	-50743	ENSMUSG00000020392	Cdkn2aipnl	CDKN2A interacting protein N-terminal like
1237	chr11	51999886	51999950	65	*	3.89187e-09	0.00161364	0.315244	-0.31363	Promoter (<=1kb)	chr11	51985146	52000466	15321	-	22210	uc007iut.2	516	ENSMUSG00000020390	Ube2b	ubiquitin-conjugating enzyme E2B
1238	chr11	52282861	52282879	19	*	1.47181e-05	0.00114179	3.814e-05	0.00110365	Promoter (<=1kb)	chr11	52252604	52283014	30411	-	21414	uc007ivk.1	135	ENSMUSG00000000782	Tcf7	transcription factor 7, T cell specific
1239	chr11	52282960	52282984	25	*	3.91287e-08	0.00379827	0.342716	-0.33886	Promoter (<=1kb)	chr11	52252604	52283014	30411	-	21414	uc007ivk.1	30	ENSMUSG00000000782	Tcf7	transcription factor 7, T cell specific
1240	chr11	52283002	52283095	94	*	4.62612e-11	0.341687	0.000902389	0.340999	Promoter (<=1kb)	chr11	52252604	52283014	30411	-	21414	uc007ivk.1	0	ENSMUSG00000000782	Tcf7	transcription factor 7, T cell specific
1241	chr11	52396626	52396698	73	*	2.00004e-10	0.332609	0.0011117	0.331497	Promoter (<=1kb)	chr11	52396428	52404242	7815	+	213673	uc007ivn.1	270	ENSMUSG00000036275	9530068E07Rik	RIKEN cDNA 9530068E07 gene
1242	chr11	53769823	53769858	36	*	0.000411209	0.0108329	0.248086	-0.23739	Promoter (<=1kb)	chr11	53770014	53777324	7311	+	16362	uc007iww.2	-191	ENSMUSG00000018899	Irf1	interferon regulatory factor 1
1243	chr11	54438373	54438382	10	*	2.38709e-09	0.342967	0.00185553	0.341128	Promoter (<=1kb)	chr11	54438179	54518241	80063	+	216742	uc007ixx.2	203	ENSMUSG00000035992	Fnip1	folliculin interacting protein 1
1244	chr11	54438395	54438395	1	*	1.43533e-06	2.49716e-05	0.00146338	-0.00143841	Promoter (<=1kb)	chr11	54438179	54518241	80063	+	216742	uc007ixx.2	216	ENSMUSG00000035992	Fnip1	folliculin interacting protein 1
1245	chr11	54438398	54438398	1	*	3.77671e-10	0.34454	0.0013978	0.343142	Promoter (<=1kb)	chr11	54438179	54518241	80063	+	216742	uc007ixx.2	219	ENSMUSG00000035992	Fnip1	folliculin interacting protein 1
1246	chr11	54438400	54438418	19	*	2.47047e-06	2.45943e-05	0.00119905	-0.00117445	Promoter (<=1kb)	chr11	54438179	54518241	80063	+	216742	uc007ixx.2	239	ENSMUSG00000035992	Fnip1	folliculin interacting protein 1
1247	chr11	54438509	54438545	37	*	2.95248e-09	0.284906	0.00115076	0.283756	Promoter (<=1kb)	chr11	54438179	54518241	80063	+	216742	uc007ixx.2	366	ENSMUSG00000035992	Fnip1	folliculin interacting protein 1
1248	chr11	54523153	54523207	55	*	2.47609e-09	0.0021268	0.335867	-0.333729	Promoter (<=1kb)	chr11	54522845	54635009	112165	+	192786	uc007ixy.2	362	ENSMUSG00000037533	Rapgef6	Rap guanine nucleotide exchange factor (GEF) 6
1249	chr11	54955895	54956044	150	*	6.63852e-09	0.338916	0.00204394	0.336799	Promoter (<=1kb)	chr11	54916796	54956178	39383	-	57783	uc007iyq.3	134	ENSMUSG00000020400	Tnip1	TNFAIP3 interacting protein 1
1250	chr11	55098023	55098071	49	*	0.000503517	0.000324099	2.80207e-05	0.000296078	Promoter (<=1kb)	chr11	55097985	55113028	15044	+	14667	uc007iyw.2	86	ENSMUSG00000000594	Gm2a	GM2 ganglioside activator protein
1251	chr11	57801965	57802067	103	*	6.02073e-06	2.96614e-05	0.000948593	-0.000918931	Promoter (<=1kb)	chr11	57801637	57810615	8979	+	50724	uc007jae.1	430	ENSMUSG00000020519	Sap30l	SAP30-like
1252	chr11	58103981	58104021	41	*	6.38511e-14	0.000382234	0.346277	-0.345895	Promoter (<=1kb)	chr11	58104153	58118594	14442	+	69125	uc007jaj.1	-172	ENSMUSG00000020515	Cnot8	CCR4-NOT transcription complex, subunit 8
1253	chr11	58104092	58104183	92	*	1.88194e-07	0.317926	0.00393489	0.313991	Promoter (<=1kb)	chr11	58104153	58118594	14442	+	69125	uc007jaj.1	0	ENSMUSG00000020515	Cnot8	CCR4-NOT transcription complex, subunit 8
1254	chr11	58867175	58867175	1	*	7.38813e-05	0.00746105	0.24651	-0.239049	Promoter (<=1kb)	chr11	58867240	58884338	17099	+	69944	uc007jcm.1	-65	ENSMUSG00000020491	2810021J22Rik	RIKEN cDNA 2810021J22 gene
1255	chr11	58938626	58938636	11	*	5.19005e-05	0.00913341	0.299377	-0.290244	Promoter (<=1kb)	chr11	58932288	58938906	6619	-	108660	uc007jcq.1	270	ENSMUSG00000020496	Rnf187	ring finger protein 187
1256	chr11	58938726	58938735	10	*	0.00406392	0.0306524	0.00145369	0.0291987	Promoter (<=1kb)	chr11	58932288	58938906	6619	-	108660	uc007jcq.1	171	ENSMUSG00000020496	Rnf187	ring finger protein 187
1257	chr11	58938813	58938907	95	*	4.41174e-06	3.30366e-05	0.00140388	-0.00137036	Promoter (<=1kb)	chr11	58932288	58938906	6619	-	108660	uc007jcq.1	0	ENSMUSG00000020496	Rnf187	ring finger protein 187
1258	chr11	58960056	58960084	29	*	9.55784e-05	0.000621466	0.0199446	-0.0193231	Intron (uc007jcu.1/56631, intron 1 of 6)	chr11	58963781	58971729	7949	+	56631	uc007jcv.1	-3725	ENSMUSG00000036964	Trim17	tripartite motif-containing 17
1259	chr11	59163684	59163769	86	*	9.64986e-11	0.00105584	0.341475	-0.340419	Promoter (<=1kb)	chr11	59155369	59163745	8377	-	216792	uc007jdd.2	0	ENSMUSG00000049287	Iba57	IBA57, iron-sulfur cluster assembly homolog (S. cerevisiae)
1260	chr11	59163813	59163813	1	*	1.24723e-05	0.00140508	3.30508e-05	0.00137203	Promoter (<=1kb)	chr11	59155369	59163745	8377	-	216792	uc007jdd.2	-68	ENSMUSG00000049287	Iba57	IBA57, iron-sulfur cluster assembly homolog (S. cerevisiae)
1261	chr11	59227981	59227996	16	*	3.81808e-05	0.00554105	0.000175655	0.00546994	Promoter (<=1kb)	chr11	59211412	59228162	16751	-	11840	uc007jdm.2	166	ENSMUSG00000048076	Arf1	ADP-ribosylation factor 1
1262	chr11	59228091	59228118	28	*	9.18984e-05	0.000112922	0.00358362	-0.0034707	Promoter (<=1kb)	chr11	59211412	59228162	16751	-	11840	uc007jdm.2	44	ENSMUSG00000048076	Arf1	ADP-ribosylation factor 1
1263	chr11	59290636	59290760	125	*	1.6032e-08	0.00318652	0.331356	-0.328348	Promoter (<=1kb)	chr11	59248042	59290751	42710	-	22416	uc007jdp.2	0	ENSMUSG00000009900	Wnt3a	wingless-type MMTV integration site family, member 3A
1264	chr11	59290835	59290835	1	*	1.48657e-09	0.00316018	2.87898e-05	0.00313139	Promoter (<=1kb)	chr11	59248042	59290751	42710	-	22416	uc007jdp.2	-84	ENSMUSG00000009900	Wnt3a	wingless-type MMTV integration site family, member 3A
1265	chr11	59307078	59307095	18	*	3.98953e-14	0.343891	0.000370914	0.343529	Promoter (<=1kb)	chr11	59306930	59333552	26623	+	216795	uc007jdq.1	165	ENSMUSG00000000126	Wnt9a	wingless-type MMTV integration site family, member 9A
1266	chr11	59307220	59307297	78	*	3.26605e-06	5.42651e-05	0.00203263	-0.00197836	Promoter (<=1kb)	chr11	59306930	59333552	26623	+	216795	uc007jdq.1	367	ENSMUSG00000000126	Wnt9a	wingless-type MMTV integration site family, member 9A
1267	chr11	59307929	59307995	67	*	2.38734e-05	0.0013369	0.0504606	-0.0490106	Promoter (1-2kb)	chr11	59306930	59333552	26623	+	216795	uc007jdq.1	1065	ENSMUSG00000000126	Wnt9a	wingless-type MMTV integration site family, member 9A
1268	chr11	59450284	59450334	51	*	2.89958e-05	0.00049911	2.40867e-05	0.000475023	Promoter (<=1kb)	chr11	59450045	59458567	8523	+	194952	uc007jdu.2	289	ENSMUSG00000036819	Jmjd4	jumonji domain containing 4
1269	chr11	59472201	59472330	130	*	3.78778e-06	0.0071241	0.301855	-0.285863	Promoter (<=1kb)	chr11	59461197	59472474	11278	-	237775	uc007jdy.1	144	ENSMUSG00000054519	Zfp867	zinc finger protein 867
1270	chr11	59506264	59506418	155	*	1.98997e-10	0.340458	0.0012664	0.339301	Promoter (<=1kb)	chr11	59485521	59506640	21120	-	268417	uc007jea.2	222	ENSMUSG00000020472	Zkscan17	zinc finger with KRAB and SCAN domains 17
1271	chr11	59506446	59506525	80	*	2.37959e-08	2.43494e-05	0.00264982	-0.00262547	Promoter (<=1kb)	chr11	59485521	59506640	21120	-	268417	uc007jea.2	115	ENSMUSG00000020472	Zkscan17	zinc finger with KRAB and SCAN domains 17
1272	chr11	59787688	59787710	23	*	2.61037e-09	0.020694	0.000198727	0.0204952	Promoter (<=1kb)	chr11	59783893	59787657	3765	-	194908	uc007jev.1	-31	ENSMUSG00000043648	Pld6	phospholipase D family, member 6
1273	chr11	59839300	59839300	1	*	1.41588e-05	8.81958e-05	0.00671107	-0.00662287	Promoter (<=1kb)	chr11	59839458	59876533	37076	+	103850	uc007jfb.1	-158	ENSMUSG00000032615	Nt5m	5',3'-nucleotidase, mitochondrial
1274	chr11	59839383	59839383	1	*	0.000175538	0.00380698	9.4386e-05	0.00371259	Promoter (<=1kb)	chr11	59839458	59876533	37076	+	103850	uc007jfb.1	-75	ENSMUSG00000032615	Nt5m	5',3'-nucleotidase, mitochondrial
1275	chr11	59839471	59839515	45	*	6.10064e-10	0.00147689	0.340309	-0.338832	Promoter (<=1kb)	chr11	59839458	59876533	37076	+	103850	uc007jfb.1	57	ENSMUSG00000032615	Nt5m	5',3'-nucleotidase, mitochondrial
1276	chr11	59948149	59948242	94	*	2.03669e-06	0.308056	0.00530801	0.302748	Promoter (<=1kb)	chr11	59948214	59963306	15093	+	192191	uc007jfg.1	0	ENSMUSG00000061650	Med9	mediator complex subunit 9
1277	chr11	59948303	59948303	1	*	7.76638e-12	0.000722542	0.345435	-0.344712	Promoter (<=1kb)	chr11	59948214	59963306	15093	+	192191	uc007jfg.1	89	ENSMUSG00000061650	Med9	mediator complex subunit 9
1278	chr11	59948311	59948427	117	*	6.24089e-09	0.00861115	3.41826e-05	0.00857698	Promoter (<=1kb)	chr11	59948214	59963306	15093	+	192191	uc007jfg.1	213	ENSMUSG00000061650	Med9	mediator complex subunit 9
1279	chr11	60105409	60105409	1	*	1.80116e-07	0.00101439	2.3098e-05	0.00099129	Promoter (<=1kb)	chr11	60105013	60199195	94183	+	19377	uc007jfk.1	396	ENSMUSG00000062115	Rai1	retinoic acid induced 1
1280	chr11	60105412	60105412	1	*	3.64306e-11	0.00112686	0.347082	-0.345955	Promoter (<=1kb)	chr11	60105013	60199195	94183	+	19377	uc007jfk.1	399	ENSMUSG00000062115	Rai1	retinoic acid induced 1
1281	chr11	60105414	60105414	1	*	1.15374e-07	0.00119903	2.32122e-05	0.00117582	Promoter (<=1kb)	chr11	60105013	60199195	94183	+	19377	uc007jfk.1	401	ENSMUSG00000062115	Rai1	retinoic acid induced 1
1282	chr11	60105432	60105439	8	*	1.53074e-09	0.00196719	0.345996	-0.344029	Promoter (<=1kb)	chr11	60105013	60199195	94183	+	19377	uc007jfk.1	426	ENSMUSG00000062115	Rai1	retinoic acid induced 1
1283	chr11	60105441	60105441	1	*	2.95768e-08	0.00217509	2.40649e-05	0.00215102	Promoter (<=1kb)	chr11	60105013	60199195	94183	+	19377	uc007jfk.1	428	ENSMUSG00000062115	Rai1	retinoic acid induced 1
1284	chr11	60105442	60105443	2	*	3.37926e-09	0.00223775	0.345571	-0.343334	Promoter (<=1kb)	chr11	60105013	60199195	94183	+	19377	uc007jfk.1	430	ENSMUSG00000062115	Rai1	retinoic acid induced 1
1285	chr11	60105444	60105448	5	*	2.51756e-08	0.0024004	2.43389e-05	0.00237606	Promoter (<=1kb)	chr11	60105013	60199195	94183	+	19377	uc007jfk.1	435	ENSMUSG00000062115	Rai1	retinoic acid induced 1
1286	chr11	60105449	60105449	1	*	7.76854e-09	0.00254736	0.344981	-0.342433	Promoter (<=1kb)	chr11	60105013	60199195	94183	+	19377	uc007jfk.1	436	ENSMUSG00000062115	Rai1	retinoic acid induced 1
1287	chr11	60105462	60105462	1	*	7.47471e-05	0.00802384	0.000157356	0.00786649	Promoter (<=1kb)	chr11	60105013	60199195	94183	+	19377	uc007jfk.1	449	ENSMUSG00000062115	Rai1	retinoic acid induced 1
1288	chr11	60105477	60105518	42	*	6.94364e-08	0.00349609	0.331792	-0.328301	Promoter (<=1kb)	chr11	60105013	60199195	94183	+	19377	uc007jfk.1	505	ENSMUSG00000062115	Rai1	retinoic acid induced 1
1289	chr11	60105794	60105798	5	*	0.000584667	0.0126386	0.245654	-0.233016	Promoter (<=1kb)	chr11	60105013	60199195	94183	+	19377	uc007jfk.1	785	ENSMUSG00000062115	Rai1	retinoic acid induced 1
1290	chr11	60477763	60477820	58	*	8.20093e-05	0.991366	0.865271	0.125354	Promoter (1-2kb)	chr11	60476215	60528368	52154	+	17910	uc033fwa.1	1605	ENSMUSG00000042678	Myo15	myosin XV
1291	chr11	60777476	60777555	80	*	1.80613e-10	0.00302242	2.40049e-05	0.0029984	Promoter (<=1kb)	chr11	60777525	60781067	3543	+	237782	uc011xvr.1	0	ENSMUSG00000049323	Smcr8	Smith-Magenis syndrome chromosome region, candidate 8 homolog (human)
1292	chr11	60777658	60777678	21	*	2.65856e-13	0.000430986	0.344813	-0.344382	Promoter (<=1kb)	chr11	60777525	60781067	3543	+	237782	uc011xvr.1	153	ENSMUSG00000049323	Smcr8	Smith-Magenis syndrome chromosome region, candidate 8 homolog (human)
1293	chr11	60913749	60913780	32	*	0.0005904	0.253674	0.0112824	0.242392	Promoter (<=1kb)	chr11	60902246	60913792	11547	-	24083	uc007jgu.2	12	ENSMUSG00000018931	Natd1	N-acetyltransferase domain containing 1
1294	chr11	60913782	60913782	1	*	6.93253e-05	0.000193766	0.0115312	-0.0113374	Promoter (<=1kb)	chr11	60902246	60913792	11547	-	24083	uc007jgu.2	10	ENSMUSG00000018931	Natd1	N-acetyltransferase domain containing 1
1295	chr11	60913787	60913787	1	*	0.000668003	0.252707	0.0116429	0.241064	Promoter (<=1kb)	chr11	60902246	60913792	11547	-	24083	uc007jgu.2	5	ENSMUSG00000018931	Natd1	N-acetyltransferase domain containing 1
1296	chr11	61408412	61408490	79	*	2.9918e-05	0.0071397	0.249308	-0.242191	Distal Intergenic	chr11	61343400	61378075	34676	-	67473	uc007jhh.2	-30337	ENSMUSG00000010122	Slc47a1	solute carrier family 47, member 1
1297	chr11	61761903	61761973	71	*	8.26398e-05	0.000439722	2.46181e-05	0.000415104	Promoter (<=1kb)	chr11	61729650	61762088	32439	-	212627	uc007jie.2	115	ENSMUSG00000020528	Prpsap2	phosphoribosyl pyrophosphate synthetase-associated protein 2
1298	chr11	61854144	61854173	30	*	2.5822e-07	3.62657e-05	0.00345895	-0.00342269	Promoter (<=1kb)	chr11	61775598	61855092	79495	-	29869	uc007jih.2	919	ENSMUSG00000004798	Ulk2	unc-51 like kinase 2
1299	chr11	61854525	61854589	65	*	0.000152577	0.00031125	2.33355e-05	0.000287915	Promoter (<=1kb)	chr11	61775598	61855092	79495	-	29869	uc007jih.2	503	ENSMUSG00000004798	Ulk2	unc-51 like kinase 2
1300	chr11	61854641	61854649	9	*	7.86831e-14	0.000381196	0.346356	-0.345975	Promoter (<=1kb)	chr11	61775598	61855092	79495	-	29869	uc007jih.2	443	ENSMUSG00000004798	Ulk2	unc-51 like kinase 2
1301	chr11	61855026	61855026	1	*	0.00195859	0.00300727	0.0871011	-0.0840938	Promoter (<=1kb)	chr11	61775598	61855092	79495	-	29869	uc007jih.2	66	ENSMUSG00000004798	Ulk2	unc-51 like kinase 2
1302	chr11	61855113	61855113	1	*	0.00204762	0.00290237	0.00017927	0.0027231	Promoter (<=1kb)	chr11	61775598	61855092	79495	-	29869	uc007jih.2	-21	ENSMUSG00000004798	Ulk2	unc-51 like kinase 2
1303	chr11	61855175	61855227	53	*	8.2301e-07	3.11643e-05	0.0028314	-0.00280023	Promoter (<=1kb)	chr11	61775598	61855092	79495	-	29869	uc007jih.2	-83	ENSMUSG00000004798	Ulk2	unc-51 like kinase 2
1304	chr11	61957035	61957082	48	*	1.34865e-06	0.0119215	0.00013014	0.0117913	Promoter (<=1kb)	chr11	61956763	62045484	88722	+	432572	uc007jil.1	319	ENSMUSG00000042331	Specc1	sperm antigen with calponin homology and coiled-coil domains 1
1305	chr11	62281397	62281444	48	*	0.0005845	2.30401e-05	0.000194995	-0.000171955	Promoter (<=1kb)	chr11	62267224	62281395	14172	-	69747	uc007jip.2	-2	ENSMUSG00000014243	Zswim7	zinc finger SWIM-type containing 7
1306	chr11	62281606	62281672	67	*	3.2672e-09	0.00165578	0.395031	-0.393379	Promoter (<=1kb)	chr11	62281473	62282588	1116	+	72795	uc007jiq.2	199	ENSMUSG00000042298	Ttc19	tetratricopeptide repeat domain 19
1307	chr11	62456787	62456797	11	*	7.71188e-05	0.00982616	0.312129	-0.302302	Promoter (<=1kb)	chr11	62384718	62457332	72615	-	20185	uc029rmb.1	535	ENSMUSG00000018501	Ncor1	nuclear receptor co-repressor 1
1308	chr11	62456799	62456847	49	*	2.42425e-06	0.0177822	0.000103042	0.0176792	Promoter (<=1kb)	chr11	62384718	62457332	72615	-	20185	uc029rmb.1	485	ENSMUSG00000018501	Ncor1	nuclear receptor co-repressor 1
1309	chr11	62457419	62457463	45	*	7.52156e-08	0.00617791	2.6706e-05	0.0061512	Promoter (<=1kb)	chr11	62384718	62457332	72615	-	20185	uc029rmb.1	-87	ENSMUSG00000018501	Ncor1	nuclear receptor co-repressor 1
1310	chr11	62457524	62457676	153	*	6.01905e-06	2.52295e-05	0.000985883	-0.000960653	Promoter (<=1kb)	chr11	62384783	62457806	73024	-	20185	uc007jjb.1	130	ENSMUSG00000018501	Ncor1	nuclear receptor co-repressor 1
1311	chr11	62551742	62551772	31	*	5.93968e-05	0.00954688	0.287719	-0.278172	Promoter (<=1kb)	chr11	62551504	62553206	1703	+	218963	uc029rmc.1	268	#N/A	Gm1821	ubiquitin pseudogene
1312	chr11	62648183	62648186	4	*	0.000243529	0.00499542	0.000152617	0.0048428	Promoter (<=1kb)	chr11	62604884	62648011	43128	-	192976	uc007jjn.1	-172	ENSMUSG00000046417	Lrrc75a	leucine rich repeat containing 75A
1313	chr11	62648279	62648298	20	*	1.08821e-06	2.72172e-05	0.002326	-0.00229878	Promoter (<=1kb)	chr11	62604884	62648523	43640	-	192976	uc007jjo.1	225	ENSMUSG00000046417	Lrrc75a	leucine rich repeat containing 75A
1314	chr11	62648380	62648486	107	*	0.00012868	0.040568	0.000722989	0.0402553	Promoter (<=1kb)	chr11	62604884	62648523	43640	-	192976	uc007jjo.1	37	ENSMUSG00000046417	Lrrc75a	leucine rich repeat containing 75A
1315	chr11	62648501	62648565	65	*	2.78564e-06	4.82868e-05	0.00191764	-0.00186935	Promoter (<=1kb)	chr11	62604884	62648523	43640	-	192976	uc007jjo.1	0	ENSMUSG00000046417	Lrrc75a	leucine rich repeat containing 75A
1316	chr11	63132603	63132681	79	*	2.75631e-05	3.12647e-05	0.000979097	-0.000947832	Promoter (<=1kb)	chr11	63132569	63159547	26979	+	18858	uc056ylm.1	112	ENSMUSG00000018217	Pmp22	peripheral myelin protein 22
1317	chr11	63133051	63133132	82	*	1.03363e-08	0.00558999	5.10846e-05	0.0055389	Promoter (<=1kb)	chr11	63132803	63159547	26745	+	18858	uc056yln.1	329	ENSMUSG00000018217	Pmp22	peripheral myelin protein 22
1318	chr11	63889182	63889215	34	*	0.000597094	0.98036	0.858923	0.121598	Exon (uc007jkn.1/54710, exon 2 of 2)	chr11	63884693	63922284	37592	-	54710	uc007jkn.1	33069	ENSMUSG00000070407	Hs3st3b1	heparan sulfate (glucosamine) 3-O-sulfotransferase 3B1
1319	chr11	64978917	64978928	12	*	1.20667e-09	0.0144554	3.93289e-05	0.014416	Promoter (<=1kb)	chr11	64979035	65002076	23042	+	68626	uc007jks.2	-118	ENSMUSG00000020549	Elac2	elaC homolog 2 (E. coli)
1320	chr11	64979214	64979319	106	*	1.27683e-10	0.343906	0.00143857	0.342467	Promoter (<=1kb)	chr11	64979035	65002076	23042	+	68626	uc007jks.2	284	ENSMUSG00000020549	Elac2	elaC homolog 2 (E. coli)
1321	chr11	65788050	65788127	78	*	2.44432e-07	0.00461048	0.387877	-0.383266	Promoter (<=1kb)	chr11	65688244	65788297	100054	-	26398	uc007jlb.1	170	ENSMUSG00000033352	Map2k4	mitogen-activated protein kinase kinase 4
1322	chr11	65788306	65788370	65	*	1.11783e-10	0.346572	0.0013514	0.345221	Promoter (<=1kb)	chr11	65688244	65788297	100054	-	26398	uc007jlb.1	-9	ENSMUSG00000033352	Map2k4	mitogen-activated protein kinase kinase 4
1323	chr11	67052334	67052334	1	*	0.00178336	0.00919849	0.223932	-0.214733	Promoter (<=1kb)	chr11	67037880	67052618	14739	-	66358	uc007jls.2	284	ENSMUSG00000020910	Adprm	ADP-ribose/CDP-alcohol diphosphatase, manganese dependent
1324	chr11	67052762	67052926	165	*	0.000226834	0.00446358	0.188347	-0.182378	Promoter (<=1kb)	chr11	67052670	67067440	14771	+	52892	uc007jlu.1	256	ENSMUSG00000069844	Sco1	SCO cytochrome oxidase deficient homolog 1 (yeast)
1325	chr11	67455371	67455383	13	*	1.88599e-07	0.00457053	0.335418	-0.330848	Distal Intergenic	chr11	67532998	67688992	155995	+	14457	uc011xwn.1	-77627	ENSMUSG00000033066	Gas7	growth arrest specific 7
1326	chr11	67455465	67455486	22	*	7.85578e-06	0.281851	0.00601101	0.27584	Distal Intergenic	chr11	67532998	67688992	155995	+	14457	uc011xwn.1	-77533	ENSMUSG00000033066	Gas7	growth arrest specific 7
1327	chr11	67922175	67922254	80	*	2.4445e-13	0.000423309	0.344734	-0.344356	Promoter (<=1kb)	chr11	67854523	67922153	67631	-	216835	uc007jne.1	-22	ENSMUSG00000020905	Usp43	ubiquitin specific peptidase 43
1328	chr11	68385856	68385862	7	*	0.000562364	0.0114669	0.239701	-0.228235	Promoter (<=1kb)	chr11	68209364	68386826	177463	-	18208	uc007jnm.1	964	ENSMUSG00000020902	Ntn1	netrin 1
1329	chr11	68385962	68385995	34	*	1.30726e-05	0.293838	0.00642339	0.287322	Promoter (<=1kb)	chr11	68209364	68386826	177463	-	18208	uc007jnm.1	831	ENSMUSG00000020902	Ntn1	netrin 1
1330	chr11	68386235	68386296	62	*	1.52219e-14	3.26445e-05	0.00666051	-0.0066333	Promoter (<=1kb)	chr11	68209364	68386826	177463	-	18208	uc007jnm.1	530	ENSMUSG00000020902	Ntn1	netrin 1
1331	chr11	68386985	68387094	110	*	1.19895e-09	0.330056	0.00137061	0.328685	Promoter (<=1kb)	chr11	68209364	68386826	177463	-	18208	uc007jnm.1	-159	ENSMUSG00000020902	Ntn1	netrin 1
1332	chr11	68432615	68432709	95	*	2.39541e-06	0.33203	0.561289	-0.229259	Promoter (<=1kb)	chr11	68432125	68476764	44640	+	320207	uc007jnn.1	584	ENSMUSG00000020901	Pik3r5	phosphoinositide-3-kinase, regulatory subunit 5, p101
1333	chr11	68691365	68691394	30	*	4.59552e-08	0.278814	0.00192725	0.276887	Promoter (<=1kb)	chr11	68691915	68746483	54569	+	77579	uc007jnx.1	-550	ENSMUSG00000020900	Myh10	myosin, heavy polypeptide 10, non-muscle
1334	chr11	68853042	68853114	73	*	2.04209e-06	0.319383	0.00603841	0.313346	Promoter (<=1kb)	chr11	68821446	68853131	31686	-	83431	uc007joc.3	17	ENSMUSG00000018736	Ndel1	nuclear distribution gene E-like homolog 1 (A. nidulans)
1335	chr11	68973379	68973396	18	*	0.00061039	0.000584628	0.0121776	-0.011593	Promoter (<=1kb)	chr11	68972484	68973855	1372	-	57785	uc007jor.2	459	ENSMUSG00000032892	Rangrf	RAN guanine nucleotide release factor
1336	chr11	69060146	69060238	93	*	9.72203e-08	0.00343111	0.328423	-0.324991	Promoter (<=1kb)	chr11	69059775	69061576	1802	+	71923	uc007jpb.1	463	ENSMUSG00000045176	Borcs6	BLOC-1 related complex subunit 6
1337	chr11	69088421	69088451	31	*	5.79232e-12	0.000841002	0.345836	-0.344995	Promoter (<=1kb)	chr11	69088528	69092381	3854	+	22318	uc007jpe.1	-107	ENSMUSG00000020894	Vamp2	vesicle-associated membrane protein 2
1338	chr11	69088657	69088723	67	*	6.1062e-07	0.00373008	0.30034	-0.296595	Promoter (<=1kb)	chr11	69088528	69092381	3854	+	22318	uc007jpe.1	195	ENSMUSG00000020894	Vamp2	vesicle-associated membrane protein 2
1339	chr11	69099075	69099085	11	*	9.95165e-05	0.00353415	0.178846	-0.175312	Promoter (<=1kb)	chr11	69098956	69109957	11002	+	18626	uc007jpg.2	129	ENSMUSG00000020893	Per1	period circadian clock 1
1340	chr11	69365153	69365154	2	*	1.80138e-07	0.0069053	4.70653e-05	0.00685823	Intron (uc029rmi.2/216848, intron 39 of 39)	chr11	69343273	69369426	26154	-	216848	uc029rmi.2	4272	ENSMUSG00000018474	Chd3	chromodomain helicase DNA binding protein 3
1341	chr11	69579033	69579045	13	*	3.7419e-05	0.000652897	2.65298e-05	0.000626367	Promoter (<=1kb)	chr11	69561754	69579324	17571	-	216853	uc007jqj.1	279	ENSMUSG00000041346	Wrap53	WD repeat containing, antisense to Trp53
1342	chr11	69579070	69579071	2	*	4.07738e-07	0.00308196	0.299437	-0.296355	Promoter (<=1kb)	chr11	69561754	69579324	17571	-	216853	uc007jqj.1	253	ENSMUSG00000041346	Wrap53	WD repeat containing, antisense to Trp53
1343	chr11	69579095	69579160	66	*	0.0005476	0.0161378	0.000308262	0.0159173	Promoter (<=1kb)	chr11	69561754	69579324	17571	-	216853	uc007jqj.1	164	ENSMUSG00000041346	Wrap53	WD repeat containing, antisense to Trp53
1344	chr11	69671623	69671623	1	*	0.0043509	0.236718	0.0184768	0.218241	Promoter (<=1kb)	chr11	69666936	69672423	5488	-	13681	uc007jqz.2	800	ENSMUSG00000059796	Eif4a1	eukaryotic translation initiation factor 4A1
1345	chr11	69671665	69671758	94	*	6.17313e-05	0.00281468	0.146386	-0.143572	Promoter (<=1kb)	chr11	69666936	69672423	5488	-	13681	uc007jqz.2	665	ENSMUSG00000059796	Eif4a1	eukaryotic translation initiation factor 4A1
1346	chr11	69671872	69671872	1	*	0.000624163	0.00306279	0.1007	-0.097637	Promoter (<=1kb)	chr11	69666936	69672423	5488	-	13681	uc007jqz.2	551	ENSMUSG00000059796	Eif4a1	eukaryotic translation initiation factor 4A1
1347	chr11	69672107	69672110	4	*	0.000460302	0.0147018	0.275953	-0.261251	Promoter (<=1kb)	chr11	69666936	69672423	5488	-	13681	uc007jqz.2	313	ENSMUSG00000059796	Eif4a1	eukaryotic translation initiation factor 4A1
1348	chr11	69758140	69758155	16	*	3.0637e-12	0.00856656	3.78808e-05	0.00852868	Promoter (<=1kb)	chr11	69733999	69758633	24635	-	20020	uc007jrk.2	478	ENSMUSG00000005198	Polr2a	polymerase (RNA) II (DNA directed) polypeptide A
1349	chr11	69759218	69759233	16	*	1.63991e-07	0.332496	0.00316713	0.329329	Promoter (<=1kb)	chr11	69733999	69758633	24635	-	20020	uc007jrk.2	-585	ENSMUSG00000005198	Polr2a	polymerase (RNA) II (DNA directed) polypeptide A
1350	chr11	69759256	69759262	7	*	0.000174088	0.000129769	0.00687667	-0.00674569	Promoter (<=1kb)	chr11	69733999	69758633	24635	-	20020	uc007jrk.2	-623	ENSMUSG00000005198	Polr2a	polymerase (RNA) II (DNA directed) polypeptide A
1351	chr11	69800553	69800641	89	*	0.000124085	0.240237	0.00674274	0.233179	Promoter (1-2kb)	chr11	69796068	69801716	5649	-	14166	uc007jrr.2	1075	ENSMUSG00000042826	Fgf11	fibroblast growth factor 11
1352	chr11	69830622	69830622	1	*	0.000883761	0.779416	0.96772	-0.188304	Intron (uc007jrw.1/216856, intron 6 of 6)	chr11	69823123	69834849	11727	-	216856	uc007jrw.1	4227	ENSMUSG00000051790	Nlgn2	neuroligin 2
1353	chr11	69838533	69838659	127	*	3.71731e-08	0.00331692	0.336988	-0.334613	Promoter (<=1kb)	chr11	69838525	69839558	1034	+	69186	uc007jry.1	134	ENSMUSG00000070394	Tmem256	transmembrane protein 256
1354	chr11	69846489	69846529	41	*	1.94046e-05	0.005792	0.275161	-0.269369	Promoter (<=1kb)	chr11	69846617	69852058	5442	+	70310	uc007jrz.2	-128	ENSMUSG00000019461	Plscr3	phospholipid scramblase 3
1355	chr11	69881012	69881165	154	*	6.4042e-06	2.34478e-05	0.000748087	-0.000724726	Promoter (<=1kb)	chr11	69878264	69880985	2722	-	216858	uc007jsd.2	-27	ENSMUSG00000046731	Kctd11	potassium channel tetramerisation domain containing 11
1356	chr11	69901811	69901858	48	*	8.10985e-12	0.00105568	0.34361	-0.342554	Promoter (<=1kb)	chr11	69901816	69912094	10279	+	216860	uc011xxf.2	0	ENSMUSG00000047284	Neurl4	neuralized E3 ubiquitin protein ligase 4
1357	chr11	69920683	69920814	132	*	8.39439e-07	2.68258e-05	0.00253343	-0.00249961	Promoter (<=1kb)	chr11	69916712	69920630	3919	-	276770	uc007jsq.2	-53	ENSMUSG00000078812	Eif5a	eukaryotic translation initiation factor 5A
1358	chr11	69920819	69920860	42	*	1.39923e-09	0.344451	0.00210409	0.342347	Promoter (<=1kb)	chr11	69916712	69920947	4236	-	276770	uc007jsr.2	87	ENSMUSG00000078812	Eif5a	eukaryotic translation initiation factor 5A
1359	chr11	69920871	69920871	1	*	3.94969e-05	9.96754e-05	0.00426296	-0.00416329	Promoter (<=1kb)	chr11	69916712	69920947	4236	-	276770	uc007jsr.2	76	ENSMUSG00000078812	Eif5a	eukaryotic translation initiation factor 5A
1360	chr11	69980871	69980942	72	*	0.000122263	0.00790732	0.25928	-0.251373	Promoter (<=1kb)	chr11	69981168	69990600	9433	+	67181	uc007jtf.1	-297	ENSMUSG00000018559	Ctdnep1	CTD nuclear envelope phosphatase 1
1361	chr11	69981010	69981044	35	*	2.41114e-14	0.344952	0.00033909	0.344613	Promoter (<=1kb)	chr11	69981168	69990600	9433	+	67181	uc007jtf.1	-158	ENSMUSG00000018559	Ctdnep1	CTD nuclear envelope phosphatase 1
1362	chr11	69981252	69981299	48	*	1.43288e-05	0.00106758	2.76086e-05	0.00103998	Promoter (<=1kb)	chr11	69968226	69981235	13010	-	54351	uc007jte.3	-17	ENSMUSG00000018565	Elp5	elongator acetyltransferase complex subunit 5
1363	chr11	69996702	69996702	1	*	0.00442614	0.0316513	0.00127819	0.0303731	Promoter (<=1kb)	chr11	69996941	70000011	3071	+	78246	uc007jtj.3	-239	ENSMUSG00000018572	Phf23	PHD finger protein 23
1364	chr11	69996789	69996912	124	*	5.06555e-09	0.00181815	0.337531	-0.335535	Promoter (<=1kb)	chr11	69996941	70000011	3071	+	78246	uc007jtj.3	-152	ENSMUSG00000018572	Phf23	PHD finger protein 23
1365	chr11	69997041	69997041	1	*	0.00746545	0.00501729	0.000497477	0.00451982	Promoter (<=1kb)	chr11	69996941	70000011	3071	+	78246	uc007jtj.3	100	ENSMUSG00000018572	Phf23	PHD finger protein 23
1366	chr11	69997307	69997307	1	*	3.50523e-06	0.000990329	2.3451e-05	0.000966878	Promoter (<=1kb)	chr11	69997462	70000011	2550	+	78246	uc007jtk.2	-155	ENSMUSG00000018572	Phf23	PHD finger protein 23
1367	chr11	69997308	69997319	12	*	3.05154e-10	0.00123794	0.345983	-0.344745	Promoter (<=1kb)	chr11	69997462	70000011	2550	+	78246	uc007jtk.2	-154	ENSMUSG00000018572	Phf23	PHD finger protein 23
1368	chr11	69997320	69997499	180	*	1.41852e-06	0.00415654	3.90119e-05	0.00411769	Promoter (<=1kb)	chr11	69997462	70000011	2550	+	78246	uc007jtk.2	0	ENSMUSG00000018572	Phf23	PHD finger protein 23
1369	chr11	70000812	70000856	45	*	3.32345e-10	0.00371378	2.82394e-05	0.00368555	Promoter (<=1kb)	chr11	70000626	70006961	6336	+	13543	uc007jtl.1	230	ENSMUSG00000020888	Dvl2	dishevelled 2, dsh homolog (Drosophila)
1370	chr11	70018523	70018633	111	*	7.97889e-07	0.00369722	5.04434e-05	0.00364677	Promoter (<=1kb)	chr11	70018605	70045531	26927	+	13385	uc007jtp.2	0	ENSMUSG00000020886	Dlg4	discs, large homolog 4 (Drosophila)
1371	chr11	70021698	70021755	58	*	5.08265e-09	0.331353	0.00176096	0.329592	Intron (uc007jtp.2/13385, intron 1 of 19)	chr11	70018605	70045531	26927	+	13385	uc007jtp.2	3150	ENSMUSG00000020886	Dlg4	discs, large homolog 4 (Drosophila)
1372	chr11	70226746	70226757	12	*	0.000413717	0.173824	0.320622	-0.146799	Exon (uc007juc.2/12029, exon 7 of 9)	chr11	70224127	70229798	5672	-	12029	uc007juc.2	3041	ENSMUSG00000000317	Bcl6b	B cell CLL/lymphoma 6, member B
1373	chr11	70653970	70654030	61	*	2.60752e-08	0.00325689	0.345489	-0.342855	Promoter (<=1kb)	chr11	70651847	70654650	2804	-	18643	uc007jvv.2	620	ENSMUSG00000018293	Pfn1	profilin 1
1374	chr11	70654031	70654031	1	*	4.19952e-08	0.00202937	2.42039e-05	0.00200516	Promoter (<=1kb)	chr11	70651847	70654650	2804	-	18643	uc007jvv.2	619	ENSMUSG00000018293	Pfn1	profilin 1
1375	chr11	70654032	70654032	1	*	1.62671e-09	0.00196758	0.345454	-0.343486	Promoter (<=1kb)	chr11	70651847	70654650	2804	-	18643	uc007jvv.2	618	ENSMUSG00000018293	Pfn1	profilin 1
1376	chr11	70654037	70654037	1	*	8.63255e-08	0.00165386	2.42253e-05	0.00162964	Promoter (<=1kb)	chr11	70651847	70654650	2804	-	18643	uc007jvv.2	613	ENSMUSG00000018293	Pfn1	profilin 1
1377	chr11	70654038	70654043	6	*	1.97458e-10	0.00138422	0.345467	-0.344083	Promoter (<=1kb)	chr11	70651847	70654650	2804	-	18643	uc007jvv.2	607	ENSMUSG00000018293	Pfn1	profilin 1
1378	chr11	70654056	70654056	1	*	1.32027e-06	0.000734851	2.3857e-05	0.000710994	Promoter (<=1kb)	chr11	70651847	70654650	2804	-	18643	uc007jvv.2	594	ENSMUSG00000018293	Pfn1	profilin 1
1379	chr11	70654057	70654057	1	*	2.32211e-12	0.000692715	0.346051	-0.345358	Promoter (<=1kb)	chr11	70651847	70654650	2804	-	18643	uc007jvv.2	593	ENSMUSG00000018293	Pfn1	profilin 1
1380	chr11	70654068	70654163	96	*	2.0164e-09	0.342521	0.00171629	0.340795	Promoter (<=1kb)	chr11	70651847	70654650	2804	-	18643	uc007jvv.2	487	ENSMUSG00000018293	Pfn1	profilin 1
1381	chr11	70654265	70654280	16	*	0.000183039	2.30839e-05	0.000270216	-0.000247132	Promoter (<=1kb)	chr11	70651847	70654650	2804	-	18643	uc007jvv.2	370	ENSMUSG00000018293	Pfn1	profilin 1
1382	chr11	70655821	70655821	1	*	1.91531e-06	4.66431e-05	0.00250966	-0.00246302	Promoter (1-2kb)	chr11	70651847	70654650	2804	-	18643	uc007jvv.2	-1171	ENSMUSG00000018293	Pfn1	profilin 1
1383	chr11	70655853	70655853	1	*	1.6193e-09	0.334775	0.00185347	0.332922	Promoter (1-2kb)	chr11	70651847	70654650	2804	-	18643	uc007jvv.2	-1203	ENSMUSG00000018293	Pfn1	profilin 1
1384	chr11	70655951	70655962	12	*	4.62622e-10	0.00137387	0.32458	-0.323206	Promoter (1-2kb)	chr11	70657176	70662513	5338	+	13808	uc007jvx.3	-1225	ENSMUSG00000060600	Eno3	enolase 3, beta muscle
1385	chr11	70656132	70656136	5	*	0.000116661	0.00119448	0.116843	-0.115648	Promoter (1-2kb)	chr11	70657176	70662513	5338	+	13808	uc007jvx.3	-1044	ENSMUSG00000060600	Eno3	enolase 3, beta muscle
1386	chr11	70700739	70700765	27	*	2.96942e-06	0.313871	0.00555735	0.308313	Promoter (<=1kb)	chr11	70700548	70707345	6798	+	16562	uc007jwk.1	217	ENSMUSG00000020821	Kif1c	kinesin family member 1C
1387	chr11	70700766	70700766	1	*	1.28572e-07	2.75747e-05	0.00226432	-0.00223675	Promoter (<=1kb)	chr11	70700548	70707345	6798	+	16562	uc007jwk.1	218	ENSMUSG00000020821	Kif1c	kinesin family member 1C
1388	chr11	70700774	70700879	106	*	3.69225e-09	0.338614	0.00196777	0.336646	Promoter (<=1kb)	chr11	70700548	70707345	6798	+	16562	uc007jwk.1	331	ENSMUSG00000020821	Kif1c	kinesin family member 1C
1389	chr11	71004229	71004251	23	*	7.55395e-06	0.0126274	0.000248629	0.0123788	Promoter (<=1kb)	chr11	70984091	71004432	20342	-	216877	uc007jxg.1	181	ENSMUSG00000040620	Dhx33	DEAH (Asp-Glu-Ala-His) box polypeptide 33
1390	chr11	71019435	71019470	36	*	7.49258e-07	0.324637	0.00644775	0.31819	Promoter (<=1kb)	chr11	71007164	71019303	12140	-	116891	uc007jxi.2	-132	ENSMUSG00000018442	Derl2	Der1-like domain family, member 2
1391	chr11	72042212	72042279	68	*	5.85952e-09	4.75913e-05	0.00452577	-0.00447818	Promoter (<=1kb)	chr11	72042502	72047370	4869	+	109212	uc007jxz.1	-290	ENSMUSG00000020808	Fam64a	family with sequence similarity 64, member A
1392	chr11	72489719	72489799	81	*	1.24953e-09	0.0224332	9.38977e-05	0.0223604	Promoter (<=1kb)	chr11	72451638	72489920	38283	-	216892	uc007jyz.3	121	ENSMUSG00000040447	Spns2	spinster homolog 2
1393	chr11	72607026	72607074	49	*	0.000308558	0.00219424	9.104e-05	0.0021032	Promoter (<=1kb)	chr11	72607261	72680140	72880	+	67128	uc007jzc.1	-235	ENSMUSG00000020794	Ube2g1	ubiquitin-conjugating enzyme E2G 1
1394	chr11	72607134	72607175	42	*	1.97807e-05	0.011131	0.315868	-0.304737	Promoter (<=1kb)	chr11	72607261	72680140	72880	+	67128	uc007jzc.1	-127	ENSMUSG00000020794	Ube2g1	ubiquitin-conjugating enzyme E2G 1
1395	chr11	72607451	72607451	1	*	0.00214994	0.00534951	0.000239794	0.00510972	Promoter (<=1kb)	chr11	72607261	72680140	72880	+	67128	uc007jzc.1	190	ENSMUSG00000020794	Ube2g1	ubiquitin-conjugating enzyme E2G 1
1396	chr11	72607859	72607969	111	*	6.64607e-06	2.53896e-05	0.00108025	-0.00105486	Promoter (<=1kb)	chr11	72607261	72680140	72880	+	67128	uc007jzc.1	708	ENSMUSG00000020794	Ube2g1	ubiquitin-conjugating enzyme E2G 1
1397	chr11	72608269	72608317	49	*	2.26381e-09	0.00178564	0.340607	-0.338822	Promoter (1-2kb)	chr11	72607261	72680140	72880	+	67128	uc007jzc.1	1056	ENSMUSG00000020794	Ube2g1	ubiquitin-conjugating enzyme E2G 1
1398	chr11	72690120	72690322	203	*	1.93679e-07	0.00499043	0.34208	-0.337425	Promoter (<=1kb)	chr11	72690002	72725180	35179	+	11736	uc007jzg.1	320	ENSMUSG00000020790	Ankfy1	ankyrin repeat and FYVE domain containing 1
1399	chr11	72795642	72795642	1	*	0.000739404	0.00878991	0.25291	-0.24412	Promoter (<=1kb)	chr11	72777232	72795839	18608	-	192986	uc007jzi.2	197	ENSMUSG00000057778	Cyb5d2	cytochrome b5 domain containing 2
1400	chr11	72796384	72796455	72	*	1.45453e-07	0.00341241	3.71483e-05	0.00337526	Promoter (<=1kb)	chr11	72796226	72851380	55155	+	195018	uc007jzk.2	229	ENSMUSG00000055670	Zzef1	zinc finger, ZZ-type with EF hand domain 1
1401	chr11	73019398	73019461	64	*	3.18775e-08	4.16966e-05	0.00227534	-0.00223364	Promoter (<=1kb)	chr11	73019008	73042065	23058	+	55984	uc007jzt.1	453	ENSMUSG00000020785	Camkk1	calcium/calmodulin-dependent protein kinase kinase 1, alpha
1402	chr11	74457274	74457287	14	*	0.000630647	0.776371	0.905638	-0.129267	Intron (uc007kbx.1/380711, intron 22 of 24)	chr11	74383483	74425271	41789	-	380711	uc007kbw.1	-32003	ENSMUSG00000038807	Rap1gap2	RAP1 GTPase activating protein 2
1403	chr11	74830406	74830446	41	*	4.10758e-07	0.00544552	0.314957	-0.309512	Promoter (<=1kb)	chr11	74830924	74845725	14802	+	17428	uc011xzb.1	-518	ENSMUSG00000000282	Mnt	max binding protein
1404	chr11	74830942	74830944	3	*	6.07101e-05	2.40302e-05	0.000330041	-0.000306011	Promoter (<=1kb)	chr11	74830924	74845725	14802	+	17428	uc011xzb.1	20	ENSMUSG00000000282	Mnt	max binding protein
1405	chr11	74831010	74831044	35	*	6.9704e-09	0.338753	0.0023645	0.336388	Promoter (<=1kb)	chr11	74830924	74845725	14802	+	17428	uc011xzb.1	120	ENSMUSG00000000282	Mnt	max binding protein
1406	chr11	74838536	74838618	83	*	2.51699e-07	0.0019281	2.67679e-05	0.00190139	Intron (uc011xzb.1/17428, intron 4 of 5)	chr11	74830924	74845725	14802	+	17428	uc011xzb.1	7694	ENSMUSG00000000282	Mnt	max binding protein
1407	chr11	75165668	75165668	1	*	0.00367573	0.182521	0.631927	-0.449406	Promoter (2-3kb)	chr11	75164565	75168152	3588	-	15248	uc007kdc.1	2484	ENSMUSG00000043099	Hic1	hypermethylated in cancer 1
1408	chr11	75170373	75170417	45	*	1.42072e-10	6.01337e-05	0.0101553	-0.0100951	Promoter (<=1kb)	chr11	75164565	75170255	5691	-	15248	uc007kdd.1	-118	ENSMUSG00000043099	Hic1	hypermethylated in cancer 1
1409	chr11	75265647	75265648	2	*	0.00133925	0.876734	0.945318	-0.0685839	Exon (uc007kdh.1/237847, exon 2 of 2)	chr11	75193993	75267762	73770	+	237847	uc007kdh.1	71655	ENSMUSG00000045287	Rtn4rl1	reticulon 4 receptor-like 1
1410	chr11	75462485	75462571	87	*	1.68005e-06	0.00212345	3.79642e-05	0.00208549	Promoter (1-2kb)	chr11	75461539	75466690	5152	+	100042498	uc007kdv.1	1032	ENSMUSG00000085148	Mir22hg	Mir22 host gene (non-protein coding)
1411	chr11	75486917	75486965	49	*	1.66374e-06	0.00446554	0.313166	-0.308701	Promoter (<=1kb)	chr11	75486820	75494020	7201	+	192159	uc007kdy.1	145	ENSMUSG00000020850	Prpf8	pre-mRNA processing factor 8
1412	chr11	75510349	75510360	12	*	1.53541e-06	0.00663662	0.329216	-0.32258	Promoter (<=1kb)	chr11	75510094	75513166	3073	+	280408	uc007kdz.1	266	ENSMUSG00000038195	Rilp	Rab interacting lysosomal protein
1413	chr11	75510511	75510511	1	*	0.000606505	0.0463568	0.00170214	0.0446547	Promoter (<=1kb)	chr11	75510094	75513166	3073	+	280408	uc007kdz.1	417	ENSMUSG00000038195	Rilp	Rab interacting lysosomal protein
1414	chr11	75630666	75630666	1	*	3.16184e-07	0.00245866	3.13226e-05	0.00242734	Promoter (<=1kb)	chr11	75631020	75635268	4249	+	19062	uc007kej.1	-354	ENSMUSG00000006127	Inpp5k	inositol polyphosphate 5-phosphatase K
1415	chr11	75630687	75630693	7	*	4.04629e-10	0.00141409	0.340629	-0.339215	Promoter (<=1kb)	chr11	75631020	75635268	4249	+	19062	uc007kej.1	-333	ENSMUSG00000006127	Inpp5k	inositol polyphosphate 5-phosphatase K
1416	chr11	75630700	75630704	5	*	1.13037e-06	0.00113257	2.6608e-05	0.00110596	Promoter (<=1kb)	chr11	75631020	75635268	4249	+	19062	uc007kej.1	-320	ENSMUSG00000006127	Inpp5k	inositol polyphosphate 5-phosphatase K
1417	chr11	75630709	75630709	1	*	4.40173e-11	0.00102463	0.342618	-0.341594	Promoter (<=1kb)	chr11	75631020	75635268	4249	+	19062	uc007kej.1	-311	ENSMUSG00000006127	Inpp5k	inositol polyphosphate 5-phosphatase K
1418	chr11	75630889	75630889	1	*	0.000119563	0.00116061	4.3198e-05	0.00111741	Promoter (<=1kb)	chr11	75631020	75635268	4249	+	19062	uc007kej.1	-131	ENSMUSG00000006127	Inpp5k	inositol polyphosphate 5-phosphatase K
1419	chr11	75733354	75733426	73	*	1.34637e-07	0.00160559	0.314108	-0.312367	Promoter (<=1kb)	chr11	75732887	75765841	32955	+	22627	uc007ket.2	539	ENSMUSG00000020849	Ywhae	tyrosine 3-monooxygenase/tryptophan 5-monooxygenase activation protein, epsilon polypeptide
1420	chr11	75733542	75733549	8	*	1.71254e-09	0.00398945	3.34519e-05	0.003956	Promoter (<=1kb)	chr11	75732887	75765841	32955	+	22627	uc007ket.2	662	ENSMUSG00000020849	Ywhae	tyrosine 3-monooxygenase/tryptophan 5-monooxygenase activation protein, epsilon polypeptide
1421	chr11	75733619	75733671	53	*	1.38629e-05	2.41526e-05	0.000673312	-0.00064916	Promoter (<=1kb)	chr11	75732887	75765841	32955	+	22627	uc007ket.2	784	ENSMUSG00000020849	Ywhae	tyrosine 3-monooxygenase/tryptophan 5-monooxygenase activation protein, epsilon polypeptide
1422	chr11	76201942	76201973	32	*	1.03575e-11	0.342798	0.000819149	0.341968	Promoter (<=1kb)	chr11	76202056	76208257	6202	+	116972	uc007kfg.2	-114	ENSMUSG00000069808	Fam57a	family with sequence similarity 57, member A
1423	chr11	76244050	76244050	1	*	0.000221993	0.0302185	0.00223603	0.0279825	Promoter (<=1kb)	chr11	76243736	76244884	1149	+	67390	uc007kfm.2	314	ENSMUSG00000038046	Rnmtl1	RNA methyltransferase like 1
1424	chr11	76398628	76398628	1	*	0.000861628	0.000593845	0.0275835	-0.0269897	Promoter (<=1kb)	chr11	76257226	76399141	141916	-	18230	uc007kfo.2	513	ENSMUSG00000020844	Nxn	nucleoredoxin
1425	chr11	76398769	76398889	121	*	2.8104e-07	0.000256102	0.0184938	-0.0182404	Promoter (<=1kb)	chr11	76257226	76399141	141916	-	18230	uc007kfo.2	252	ENSMUSG00000020844	Nxn	nucleoredoxin
1426	chr11	76494606	76494606	1	*	1.18024e-09	0.341134	0.00179462	0.33934	Promoter (<=1kb)	chr11	76455609	76495456	39848	-	109934	uc007kfv.1	850	ENSMUSG00000017631	Abr	active BCR-related gene
1427	chr11	76494613	76494650	38	*	2.43619e-08	2.54184e-05	0.00248312	-0.00245771	Promoter (<=1kb)	chr11	76455609	76495456	39848	-	109934	uc007kfv.1	806	ENSMUSG00000017631	Abr	active BCR-related gene
1428	chr11	76494661	76494668	8	*	2.51632e-08	0.343626	0.00351533	0.340111	Promoter (<=1kb)	chr11	76455609	76495456	39848	-	109934	uc007kfv.1	788	ENSMUSG00000017631	Abr	active BCR-related gene
1429	chr11	76494672	76494672	1	*	3.12959e-10	6.73801e-05	0.00833767	-0.00827029	Promoter (<=1kb)	chr11	76455609	76495456	39848	-	109934	uc007kfv.1	784	ENSMUSG00000017631	Abr	active BCR-related gene
1430	chr11	76494673	76494678	6	*	1.80688e-07	0.343854	0.00664567	0.337208	Promoter (<=1kb)	chr11	76455609	76495456	39848	-	109934	uc007kfv.1	778	ENSMUSG00000017631	Abr	active BCR-related gene
1431	chr11	76494685	76494689	5	*	3.43181e-05	0.000377766	0.0130182	-0.0126405	Promoter (<=1kb)	chr11	76455609	76495456	39848	-	109934	uc007kfv.1	767	ENSMUSG00000017631	Abr	active BCR-related gene
1432	chr11	76494714	76494738	25	*	1.15171e-05	0.341117	0.0135801	0.327556	Promoter (<=1kb)	chr11	76455609	76495456	39848	-	109934	uc007kfv.1	718	ENSMUSG00000017631	Abr	active BCR-related gene
1433	chr11	76494794	76494808	15	*	2.76587e-05	0.000657592	0.199623	-0.198887	Promoter (<=1kb)	chr11	76455609	76495456	39848	-	109934	uc007kfv.1	648	ENSMUSG00000017631	Abr	active BCR-related gene
1434	chr11	76623454	76623569	116	*	1.58787e-09	0.00139794	0.345465	-0.344067	Distal Intergenic	chr11	76416732	76577739	161008	-	109934	uc007kfu.2	-45715	ENSMUSG00000017631	Abr	active BCR-related gene
1435	chr11	76623610	76623614	5	*	0.000136446	0.000363213	2.40108e-05	0.000339202	Distal Intergenic	chr11	76416732	76577739	161008	-	109934	uc007kfu.2	-45871	ENSMUSG00000017631	Abr	active BCR-related gene
1436	chr11	76763173	76763300	128	*	1.37181e-09	0.297773	0.000754832	0.296618	Promoter (<=1kb)	chr11	76726602	76763555	36954	-	53334	uc007kfz.1	255	ENSMUSG00000010392	Gosr1	golgi SNAP receptor complex member 1
1437	chr11	76996219	76996267	49	*	0.000134185	0.104882	0.288486	-0.183604	Promoter (2-3kb)	chr11	76998597	77032343	33747	+	15567	uc007kgf.2	-2378	ENSMUSG00000020838	Slc6a4	solute carrier family 6 (neurotransmitter transporter, serotonin), member 4
1438	chr11	77348237	77348243	7	*	0.000174795	0.0102512	0.270254	-0.260003	Promoter (<=1kb)	chr11	77348280	77432157	83878	+	237860	uc007kgn.1	-43	ENSMUSG00000037926	Ssh2	slingshot homolog 2 (Drosophila)
1439	chr11	77491250	77491285	36	*	6.7204e-06	0.273488	0.00443637	0.269052	Promoter (1-2kb)	chr11	77470487	77489678	19192	-	268445	uc007kgx.1	-1572	ENSMUSG00000037907	Ankrd13b	ankyrin repeat domain 13b
1440	chr11	77493191	77493233	43	*	0.000114542	0.00572269	0.280785	-0.275062	Promoter (<=1kb)	chr11	77493412	77507774	14363	+	216963	uc007kgy.1	-221	ENSMUSG00000011877	Git1	G protein-coupled receptor kinase-interactor 1
1441	chr11	77493376	77493426	51	*	1.78649e-09	2.37789e-05	0.00166527	-0.00164149	Promoter (<=1kb)	chr11	77493412	77507774	14363	+	216963	uc007kgy.1	0	ENSMUSG00000011877	Git1	G protein-coupled receptor kinase-interactor 1
1442	chr11	77686659	77686666	8	*	8.06691e-08	0.00267032	0.322749	-0.320079	Promoter (<=1kb)	chr11	77686139	77717966	31828	+	68564	uc007khd.2	527	ENSMUSG00000037857	Nufip2	nuclear fragile X mental retardation protein interacting protein 2
1443	chr11	77982777	77983006	230	*	2.0368e-06	3.91224e-05	0.00179027	-0.00174844	Promoter (<=1kb)	chr11	77982816	78009923	27108	+	268448	uc007khr.2	0	ENSMUSG00000037791	Phf12	PHD finger protein 12
1444	chr11	78032047	78032054	8	*	4.56934e-06	0.338769	0.00894054	0.329829	Promoter (<=1kb)	chr11	78032313	78037864	5552	+	70451	uc007khu.1	-266	ENSMUSG00000020834	Dhrs13	dehydrogenase/reductase (SDR family) member 13
1445	chr11	78115378	78115489	112	*	4.32544e-06	2.82493e-05	0.00140648	-0.00137823	Promoter (<=1kb)	chr11	78115626	78157339	41714	+	216971	uc007kie.2	-248	ENSMUSG00000037750	Fam222b	family with sequence similarity 222, member B
1446	chr11	78154491	78154491	1	*	0.00257249	0.541553	0.363362	0.178191	Exon (uc007kid.2/216971, exon 3 of 3)	chr11	78158423	78165550	7128	-	22032	uc007kif.2	11059	ENSMUSG00000017386	Traf4	TNF receptor associated factor 4
1447	chr11	78165843	78165865	23	*	4.44851e-10	0.311853	0.00107692	0.310769	Promoter (<=1kb)	chr11	78158423	78165550	7128	-	22032	uc007kif.2	-293	ENSMUSG00000017386	Traf4	TNF receptor associated factor 4
1448	chr11	78178884	78178929	46	*	4.91041e-05	0.0030988	8.17123e-05	0.00301708	Promoter (<=1kb)	chr11	78178827	78178887	61	+	102465761	uc033fym.1	102	#N/A	Mir7653	microRNA 7653
1449	chr11	78183404	78183406	3	*	3.81875e-07	0.00325888	0.27805	-0.274791	Promoter (<=1kb)	chr11	78180936	78183584	2649	-	268449	uc007kil.3	178	ENSMUSG00000058546	Rpl23a	ribosomal protein L23A
1450	chr11	78189137	78189267	131	*	8.58041e-08	0.00330214	0.325398	-0.322317	Promoter (<=1kb)	chr11	78188748	78192193	3446	+	19376	uc007kim.2	519	ENSMUSG00000002059	Rab34	RAB34, member RAS oncogene family
1451	chr11	78328907	78328971	65	*	2.16069e-12	2.80111e-05	0.007762	-0.00771982	Promoter (<=1kb)	chr11	78328422	78334873	6452	+	276846	uc007kiy.1	549	ENSMUSG00000041958	Pigs	phosphatidylinositol glycan anchor biosynthesis, class S
1452	chr11	78512431	78512434	4	*	2.16512e-14	0.34745	0.000327729	0.347123	Promoter (<=1kb)	chr11	78512296	78522736	10441	+	67811	uc007kjo.1	138	ENSMUSG00000001100	Poldip2	polymerase (DNA-directed), delta interacting protein 2
1453	chr11	78512577	78512749	173	*	1.50645e-11	0.0160269	0.000233649	0.0157932	Promoter (<=1kb)	chr11	78512296	78522736	10441	+	67811	uc007kjo.1	453	ENSMUSG00000001100	Poldip2	polymerase (DNA-directed), delta interacting protein 2
1454	chr11	79146478	79146478	1	*	2.29355e-07	0.343623	0.00411829	0.339505	Promoter (<=1kb)	chr11	79014801	79146354	131554	-	16706	uc033fyo.1	-124	ENSMUSG00000018334	Ksr1	kinase suppressor of ras 1
1455	chr11	79146481	79146481	1	*	8.52541e-08	2.56718e-05	0.00421856	-0.00419289	Promoter (<=1kb)	chr11	79014801	79146354	131554	-	16706	uc033fyo.1	-127	ENSMUSG00000018334	Ksr1	kinase suppressor of ras 1
1456	chr11	79146507	79146520	14	*	8.2998e-07	0.338967	0.00491091	0.334056	Promoter (<=1kb)	chr11	79014801	79146354	131554	-	16706	uc033fyo.1	-153	ENSMUSG00000018334	Ksr1	kinase suppressor of ras 1
1457	chr11	79214102	79214102	1	*	9.87396e-08	0.00286591	0.332098	-0.329232	Distal Intergenic	chr11	79239382	79243575	4194	-	78889	uc007kkh.1	29473	ENSMUSG00000017677	Wsb1	WD repeat and SOCS box-containing 1
1458	chr11	79214127	79214127	1	*	1.24899e-05	0.00408801	5.13364e-05	0.00403668	Distal Intergenic	chr11	79239382	79243575	4194	-	78889	uc007kkh.1	29448	ENSMUSG00000017677	Wsb1	WD repeat and SOCS box-containing 1
1459	chr11	79214137	79214137	1	*	1.01579e-05	0.00526445	0.294773	-0.289508	Distal Intergenic	chr11	79239382	79243575	4194	-	78889	uc007kkh.1	29438	ENSMUSG00000017677	Wsb1	WD repeat and SOCS box-containing 1
1460	chr11	79806227	79806258	32	*	0.00126129	0.129379	0.291623	-0.162244	Distal Intergenic	chr11	79726400	79726511	112	+	723853	uc011yao.1	79858	ENSMUSG00000065489	Mir365-2	microRNA 365-2
1461	chr11	80477155	80477155	1	*	0.000856317	0.00213583	0.0109556	-0.00881972	Promoter (<=1kb)	chr11	80477046	80481179	4134	+	12569	uc011yat.1	109	ENSMUSG00000048895	Cdk5r1	cyclin-dependent kinase 5, regulatory subunit 1 (p35)
1462	chr11	80477303	80477330	28	*	5.96846e-07	0.00336678	0.358887	-0.3545	Promoter (<=1kb)	chr11	80477046	80481179	4134	+	12569	uc011yat.1	284	ENSMUSG00000048895	Cdk5r1	cyclin-dependent kinase 5, regulatory subunit 1 (p35)
1463	chr11	80477491	80477497	7	*	1.10659e-06	3.65132e-05	0.00439331	-0.0043568	Promoter (<=1kb)	chr11	80477046	80481179	4134	+	12569	uc011yat.1	451	ENSMUSG00000048895	Cdk5r1	cyclin-dependent kinase 5, regulatory subunit 1 (p35)
1464	chr11	80508863	80508863	1	*	0.000653839	0.0273129	0.0707857	-0.0434727	Promoter (<=1kb)	chr11	80507410	80509106	1697	-	77417	uc056yne.1	243	#N/A	C030013C21Rik	RIKEN cDNA C030013C21 gene
1465	chr11	81152294	81152294	1	*	0.000857285	0.00100337	0.0409618	-0.0399584	Promoter (<=1kb)	chr11	80880163	81152903	272741	-	11418	uc007kml.2	609	ENSMUSG00000020704	Asic2	acid-sensing (proton-gated) ion channel 2
1466	chr11	82261460	82261510	51	*	0.000425704	0.714692	0.966296	-0.251617	Distal Intergenic	chr11	82176666	82179812	3147	-	20290	uc007kmu.1	-81648	ENSMUSG00000020702	Ccl1	chemokine (C-C motif) ligand 1
1467	chr11	82870470	82870471	2	*	0.00122258	8.60582e-05	0.00147806	-0.00139201	Promoter (<=1kb)	chr11	82803819	82870744	66926	-	67338	uc007kni.2	273	ENSMUSG00000020696	Rffl	ring finger and FYVE like domain containing protein
1468	chr11	82888738	82888756	19	*	0.000430903	0.0164236	0.242904	-0.22648	Promoter (1-2kb)	chr11	82871961	82890624	18664	-	19364	uc033fyu.1	1868	ENSMUSG00000018841	Rad51d	RAD51 homolog D
1469	chr11	82897326	82897375	50	*	0.000110847	0.840306	0.986935	-0.146576	Promoter (<=1kb)	chr11	82897539	82900737	3199	+	78919	uc007kns.1	-213	ENSMUSG00000018844	Fndc8	fibronectin type III domain containing 8
1470	chr11	83291710	83291734	25	*	3.42504e-09	0.00192106	0.344736	-0.342815	Promoter (<=1kb)	chr11	83291699	83294637	2939	+	613254	uc007kom.2	35	ENSMUSG00000093483	AA465934	expressed sequence AA465934
1471	chr11	83291752	83291752	1	*	1.03002e-06	0.00226235	2.70176e-05	0.00223533	Promoter (<=1kb)	chr11	83291699	83294637	2939	+	613254	uc007kom.2	53	ENSMUSG00000093483	AA465934	expressed sequence AA465934
1472	chr11	83462963	83462993	31	*	1.05009e-07	0.00536357	4.12177e-05	0.0053248	Promoter (<=1kb)	chr11	83441876	83462961	21086	-	118453	uc007kpa.1	-2	ENSMUSG00000020682	Mmp28	matrix metallopeptidase 28 (epilysin)
1473	chr11	83473344	83473524	181	*	7.72184e-07	0.00398475	3.40674e-05	0.00395439	Promoter (<=1kb)	chr11	83473108	83489213	16106	+	70439	uc007kpe.1	416	ENSMUSG00000020680	Taf15	TAF15 RNA polymerase II, TATA box binding protein (TBP)-associated factor
1474	chr11	83753767	83753890	124	*	2.838e-11	0.332645	0.000596454	0.33162	Promoter (<=1kb)	chr11	83753712	83783754	30043	+	217026	uc007kpv.1	178	ENSMUSG00000000976	Heatr6	HEAT repeat containing 6
1475	chr11	83849691	83849758	68	*	7.50692e-08	0.0344033	0.0873049	-0.0529016	Promoter (1-2kb)	chr11	83850869	83905917	55049	+	21410	uc007kpx.2	-1178	ENSMUSG00000020679	Hnf1b	HNF1 homeobox B
1476	chr11	83942149	83942200	52	*	1.51889e-05	5.73053e-05	0.00345327	-0.00339597	Promoter (<=1kb)	chr11	83942090	83963086	20997	+	78394	uc007kpz.2	110	ENSMUSG00000020677	Ddx52	DEAD (Asp-Glu-Ala-Asp) box polypeptide 52
1477	chr11	83942280	83942373	94	*	1.92743e-05	0.0135437	0.000310173	0.0134311	Promoter (<=1kb)	chr11	83942090	83963086	20997	+	78394	uc007kpz.2	283	ENSMUSG00000020677	Ddx52	DEAD (Asp-Glu-Ala-Asp) box polypeptide 52
1478	chr11	84079618	84079618	1	*	0.000590533	0.781683	0.891091	-0.109408	Exon (uc007kqf.1/217031, exon 16 of 16)	chr11	84048045	84068577	20533	-	56405	uc007kqe.1	-11041	ENSMUSG00000018648	Dusp14	dual specificity phosphatase 14
1479	chr11	84129482	84129529	48	*	2.28163e-08	0.00256249	3.30359e-05	0.00252947	Promoter (<=1kb)	chr11	84078920	84129568	50649	-	217031	uc007kqf.1	39	ENSMUSG00000018651	Tada2a	transcriptional adaptor 2A
1480	chr11	84179851	84179953	103	*	2.91369e-08	0.339408	0.00373643	0.336291	Intron (uc007kqg.1/107476, intron 1 of 3)	chr11	84173318	84233808	60491	+	107476	uc007kqk.1	6635	ENSMUSG00000020532	Acaca	acetyl-Coenzyme A carboxylase alpha
1481	chr11	84542244	84542282	39	*	0.000401435	0.593133	0.796419	-0.203286	Distal Intergenic	chr11	84525660	84535831	10172	+	78365	uc007kqp.2	16622	ENSMUSG00000087211	Lhx1os	LIM homeobox 1, opposite strand
1482	chr11	84869787	84869888	102	*	2.30385e-05	0.00536571	0.293556	-0.288146	Promoter (<=1kb)	chr11	84870005	84871631	1627	+	102635561	uc033fyy.2	-218	#N/A	Ggnbp2os	gametogenetin binding protein 2, opposite strand
1483	chr11	84870685	84870745	61	*	6.50202e-11	0.001028	0.338121	-0.337161	Promoter (<=1kb)	chr11	84832361	84870738	38378	-	217039	uc007kqv.1	0	ENSMUSG00000020530	Ggnbp2	gametogenetin binding protein 2
1484	chr11	84870949	84870966	18	*	5.15947e-08	0.00451425	3.49732e-05	0.00447928	Promoter (<=1kb)	chr11	84870923	84871631	709	+	102635561	uc056yno.1	43	#N/A	Ggnbp2os	gametogenetin binding protein 2, opposite strand
1485	chr11	84871077	84871077	1	*	1.31151e-05	0.1953	0.00278692	0.192513	Promoter (<=1kb)	chr11	84870923	84871631	709	+	102635561	uc056yno.1	154	#N/A	Ggnbp2os	gametogenetin binding protein 2, opposite strand
1486	chr11	84880193	84880210	18	*	0.00342394	0.0522593	0.0124928	0.0397665	Promoter (<=1kb)	chr11	84876313	84880195	3883	-	70325	uc007kqy.1	0	ENSMUSG00000045140	Pigw	phosphatidylinositol glycan anchor biosynthesis, class W
1487	chr11	84880338	84880393	56	*	1.67077e-08	0.301567	0.00195122	0.299616	Promoter (<=1kb)	chr11	84876313	84880285	3973	-	70325	uc007kqz.1	-53	ENSMUSG00000045140	Pigw	phosphatidylinositol glycan anchor biosynthesis, class W
1488	chr11	84880397	84880397	1	*	0.000844444	0.000153327	0.0029071	-0.00275377	Promoter (<=1kb)	chr11	84876313	84880285	3973	-	70325	uc007kqz.1	-112	ENSMUSG00000045140	Pigw	phosphatidylinositol glycan anchor biosynthesis, class W
1489	chr11	84880403	84880405	3	*	4.23429e-06	0.246127	0.00338957	0.242738	Promoter (<=1kb)	chr11	84876313	84880285	3973	-	70325	uc007kqz.1	-118	ENSMUSG00000045140	Pigw	phosphatidylinositol glycan anchor biosynthesis, class W
1490	chr11	85832961	85832963	3	*	1.76142e-08	0.343317	0.00253476	0.340782	Promoter (<=1kb)	chr11	85832615	85841948	9334	+	21385	uc007ksb.1	348	ENSMUSG00000000093	Tbx2	T-box 2
1491	chr11	85832968	85832968	1	*	3.01668e-07	2.53338e-05	0.00275858	-0.00273325	Promoter (<=1kb)	chr11	85832615	85841948	9334	+	21385	uc007ksb.1	353	ENSMUSG00000000093	Tbx2	T-box 2
1492	chr11	85832976	85832976	1	*	3.05102e-08	0.344906	0.00290656	0.341999	Promoter (<=1kb)	chr11	85832615	85841948	9334	+	21385	uc007ksb.1	361	ENSMUSG00000000093	Tbx2	T-box 2
1493	chr11	86544812	86544879	68	*	1.07998e-06	0.000176094	0.0170618	-0.0166373	Promoter (<=1kb)	chr11	86499011	86544807	45797	-	72508	uc007ksn.2	-5	ENSMUSG00000020516	Rps6kb1	ribosomal protein S6 kinase, polypeptide 1
1494	chr11	86544904	86544985	82	*	1.83419e-08	0.334435	0.00272958	0.331767	Promoter (<=1kb)	chr11	86544991	86567360	22370	+	56427	uc007ksr.1	-87	ENSMUSG00000020513	Tubd1	tubulin, delta 1
1495	chr11	87109498	87109643	146	*	3.11309e-07	0.00561165	5.17329e-05	0.00555336	Promoter (<=1kb)	chr11	87109261	87123298	14038	+	66140	uc007kti.1	382	ENSMUSG00000020492	Ska2	spindle and kinetochore associated complex subunit 2
1496	chr11	87109859	87109907	49	*	6.10176e-08	0.00300284	2.82795e-05	0.00297456	Promoter (<=1kb)	chr11	87109261	87123298	14038	+	66140	uc007kti.1	646	ENSMUSG00000020492	Ska2	spindle and kinetochore associated complex subunit 2
1497	chr11	87126934	87127128	195	*	6.19971e-10	0.338787	0.00175925	0.337007	Promoter (<=1kb)	chr11	87127075	87220686	93612	+	68729	uc007ktm.2	0	ENSMUSG00000018548	Trim37	tripartite motif-containing 37
1498	chr11	87778560	87778569	10	*	2.36689e-05	0.00784178	9.56436e-05	0.00774614	Promoter (<=1kb)	chr11	87778793	87780371	1579	+	207777	uc029rne.1	-233	ENSMUSG00000034156	Bzrap1	benzodiazepine receptor associated protein 1
1499	chr11	87778576	87778576	1	*	0.000427271	0.0102334	0.260644	-0.25041	Promoter (<=1kb)	chr11	87778793	87780371	1579	+	207777	uc029rne.1	-217	ENSMUSG00000034156	Bzrap1	benzodiazepine receptor associated protein 1
1500	chr11	87987021	87987024	4	*	6.62289e-12	2.39984e-05	0.0124631	-0.0124391	Promoter (<=1kb)	chr11	87979525	87986585	7061	-	68097	uc011ycd.1	-436	ENSMUSG00000020483	Dynll2	dynein light chain LC8-type 2
1501	chr11	87987204	87987260	57	*	1.52589e-07	0.003041	0.305463	-0.302363	Promoter (<=1kb)	chr11	87979525	87987533	8009	-	68097	uc007kva.2	273	ENSMUSG00000020483	Dynll2	dynein light chain LC8-type 2
1502	chr11	88048330	88048330	1	*	1.87435e-08	2.32519e-05	0.0019505	-0.00192724	Promoter (<=1kb)	chr11	88047373	88053757	6385	+	110809	uc007kvc.2	957	ENSMUSG00000018379	Srsf1	serine/arginine-rich splicing factor 1
1503	chr11	88048468	88048496	29	*	0.00122918	0.0871768	0.00245768	0.0847191	Promoter (1-2kb)	chr11	88047373	88053757	6385	+	110809	uc007kvc.2	1123	ENSMUSG00000018379	Srsf1	serine/arginine-rich splicing factor 1
1504	chr11	88068032	88068032	1	*	3.17037e-08	0.00250173	0.334541	-0.332039	Promoter (<=1kb)	chr11	88068279	88084729	16451	+	22344	uc007kvf.2	-247	ENSMUSG00000018377	Vezf1	vascular endothelial zinc finger 1
1505	chr11	88068034	88068034	1	*	0.00203009	0.0058498	0.000239155	0.00561064	Promoter (<=1kb)	chr11	88068279	88084729	16451	+	22344	uc007kvf.2	-245	ENSMUSG00000018377	Vezf1	vascular endothelial zinc finger 1
1506	chr11	88068044	88068143	100	*	2.53996e-09	0.0021696	0.342798	-0.340849	Promoter (<=1kb)	chr11	88068279	88084729	16451	+	22344	uc007kvf.2	-235	ENSMUSG00000018377	Vezf1	vascular endothelial zinc finger 1
1507	chr11	88068253	88068300	48	*	3.63567e-10	0.340191	0.00152996	0.338661	Promoter (<=1kb)	chr11	88068279	88084729	16451	+	22344	uc007kvf.2	0	ENSMUSG00000018377	Vezf1	vascular endothelial zinc finger 1
1508	chr11	88099255	88099255	1	*	8.62485e-08	0.00567681	3.8948e-05	0.00563786	Promoter (<=1kb)	chr11	88099146	88185355	86210	+	103841	uc007kvg.2	109	ENSMUSG00000018378	Cuedc1	CUE domain containing 1
1509	chr11	88099263	88099274	12	*	1.60422e-07	0.00385264	0.394157	-0.390304	Promoter (<=1kb)	chr11	88099146	88185355	86210	+	103841	uc007kvg.2	128	ENSMUSG00000018378	Cuedc1	CUE domain containing 1
1510	chr11	88099359	88099406	48	*	1.47899e-05	0.331646	0.00966992	0.325435	Promoter (<=1kb)	chr11	88099146	88185355	86210	+	103841	uc007kvg.2	260	ENSMUSG00000018378	Cuedc1	CUE domain containing 1
1511	chr11	88187738	88187818	81	*	8.86599e-06	5.19215e-05	0.00399985	-0.00394793	Intron (uc007kvh.2/103841, intron 7 of 10)	chr11	88194106	88211507	17402	+	64656	uc056yny.1	-6368	ENSMUSG00000023723	Mrps23	mitochondrial ribosomal protein S23
1512	chr11	88718030	88718048	19	*	5.8747e-05	0.00100927	3.50852e-05	0.000974183	Promoter (<=1kb)	chr11	88339382	88718267	378886	-	76626	uc007kvl.2	219	ENSMUSG00000069769	Msi2	musashi RNA-binding protein 2
1513	chr11	88718054	88718061	8	*	1.02561e-11	0.000722853	0.340337	-0.339614	Promoter (<=1kb)	chr11	88339382	88718267	378886	-	76626	uc007kvl.2	206	ENSMUSG00000069769	Msi2	musashi RNA-binding protein 2
1514	chr11	88718181	88718243	63	*	3.65173e-05	2.4599e-05	0.000583978	-0.000559014	Promoter (<=1kb)	chr11	88339382	88718267	378886	-	76626	uc007kvl.2	24	ENSMUSG00000069769	Msi2	musashi RNA-binding protein 2
1515	chr11	88718641	88718707	67	*	7.49563e-05	0.01009	0.000189178	0.00990083	Promoter (<=1kb)	chr11	88718643	88722600	3958	+	193280	uc007kvs.2	0	#N/A	C030037D09Rik	RIKEN cDNA C030037D09 gene
1516	chr11	88718787	88718865	79	*	4.9922e-10	0.00183394	0.338175	-0.336341	Promoter (<=1kb)	chr11	88718643	88722600	3958	+	193280	uc007kvs.2	222	#N/A	C030037D09Rik	RIKEN cDNA C030037D09 gene
1517	chr11	88718874	88718874	1	*	6.7311e-07	0.00388784	5.08952e-05	0.00383695	Promoter (<=1kb)	chr11	88718643	88722600	3958	+	193280	uc007kvs.2	231	#N/A	C030037D09Rik	RIKEN cDNA C030037D09 gene
1518	chr11	88973909	88973934	26	*	5.70432e-19	8.53272e-05	0.344585	-0.3445	Promoter (<=1kb)	chr11	88973864	88991613	17750	+	12812	uc007kwa.1	70	ENSMUSG00000033983	Coil	coilin
1519	chr11	88974094	88974121	28	*	4.76943e-08	0.320092	0.00322557	0.316867	Promoter (<=1kb)	chr11	88973864	88991613	17750	+	12812	uc007kwa.1	257	ENSMUSG00000033983	Coil	coilin
1520	chr11	89060241	89060315	75	*	0.0016951	0.0135314	0.000568795	0.0129626	Promoter (<=1kb)	chr11	89060751	89067884	7134	+	414094	uc033fze.1	-510	#N/A	Dgkeos	diacylglycerol kinase, epsilon, opposite strand
1521	chr11	89060700	89060756	57	*	2.80714e-06	0.342723	0.00802413	0.334698	Promoter (<=1kb)	chr11	89060751	89067884	7134	+	414094	uc033fze.1	0	#N/A	Dgkeos	diacylglycerol kinase, epsilon, opposite strand
1522	chr11	93955264	93955349	86	*	5.6521e-10	0.00120353	0.331458	-0.330042	Promoter (<=1kb)	chr11	93949814	93955783	5970	-	18103	uc007kxs.2	434	ENSMUSG00000020857	Nme2	NME/NM23 nucleoside diphosphate kinase 2
1523	chr11	93995919	93995966	48	*	1.72125e-05	0.305869	0.00862185	0.297247	Promoter (<=1kb)	chr11	93996091	94050649	54559	+	70834	uc007kxv.1	-172	ENSMUSG00000020859	Spag9	sperm associated antigen 9
1524	chr11	93996285	93996396	112	*	1.6074e-10	0.00143727	0.343345	-0.34166	Promoter (<=1kb)	chr11	93996091	94050649	54559	+	70834	uc007kxv.1	305	ENSMUSG00000020859	Spag9	sperm associated antigen 9
1525	chr11	94549051	94549183	133	*	9.23972e-07	2.74344e-05	0.00107878	-0.00105135	Promoter (<=1kb)	chr11	94539798	94549207	9410	-	237926	uc007kza.2	24	ENSMUSG00000039096	Rsad1	radical S-adenosyl methionine domain containing 1
1526	chr11	94549193	94549195	3	*	1.59218e-08	0.316443	0.00255088	0.313892	Promoter (<=1kb)	chr11	94539798	94549207	9410	-	237926	uc007kza.2	12	ENSMUSG00000039096	Rsad1	radical S-adenosyl methionine domain containing 1
1527	chr11	94549210	94549229	20	*	1.04134e-06	6.98719e-05	0.00440033	-0.00433046	Promoter (<=1kb)	chr11	94539798	94549207	9410	-	237926	uc007kza.2	-3	ENSMUSG00000039096	Rsad1	radical S-adenosyl methionine domain containing 1
1528	chr11	94549237	94549251	15	*	4.27599e-05	0.265747	0.00721539	0.258532	Promoter (<=1kb)	chr11	94539798	94549207	9410	-	237926	uc007kza.2	-30	ENSMUSG00000039096	Rsad1	radical S-adenosyl methionine domain containing 1
1529	chr11	94549270	94549287	18	*	0.00188093	0.000680266	0.0167567	-0.0160764	Promoter (<=1kb)	chr11	94539798	94549207	9410	-	237926	uc007kza.2	-63	ENSMUSG00000039096	Rsad1	radical S-adenosyl methionine domain containing 1
1530	chr11	94676994	94677050	57	*	6.69992e-08	2.70447e-05	0.00206206	-0.00200431	Promoter (<=1kb)	chr11	94663847	94677493	13647	-	217119	uc007kzi.2	443	ENSMUSG00000020868	Xylt2	xylosyltransferase II
1531	chr11	94677078	94677078	1	*	0.00183373	0.00163968	0.00013793	0.00150175	Promoter (<=1kb)	chr11	94663847	94677493	13647	-	217119	uc007kzi.2	415	ENSMUSG00000020868	Xylt2	xylosyltransferase II
1532	chr11	94677279	94677299	21	*	6.93235e-06	0.00411549	0.255429	-0.251313	Promoter (<=1kb)	chr11	94663847	94677493	13647	-	217119	uc007kzi.2	194	ENSMUSG00000020868	Xylt2	xylosyltransferase II
1533	chr11	94991064	94991229	166	*	8.90849e-07	0.219096	0.00225729	0.217012	Promoter (<=1kb)	chr11	94991212	95006898	15687	+	217124	uc007kzr.2	0	ENSMUSG00000038976	Ppp1r9b	protein phosphatase 1, regulatory subunit 9B
1534	chr11	95199469	95199516	48	*	0.000768061	0.750474	0.870688	-0.118641	Distal Intergenic	chr11	95140447	95145801	5355	-	13394	uc007kzz.2	-53668	ENSMUSG00000020871	Dlx4	distal-less homeobox 4
1535	chr11	95258593	95258639	47	*	6.63089e-06	0.00381139	3.17775e-05	0.00377962	Promoter (2-3kb)	chr11	95261529	95269261	7733	+	93670	uc007lac.1	-2936	ENSMUSG00000020872	Tac4	tachykinin 4
1536	chr11	95259073	95259120	48	*	7.72249e-11	0.0148548	6.86461e-05	0.0147861	Promoter (2-3kb)	chr11	95261529	95269261	7733	+	93670	uc007lac.1	-2456	ENSMUSG00000020872	Tac4	tachykinin 4
1537	chr11	95309669	95309692	24	*	2.59641e-05	0.000111227	0.00659721	-0.00648601	Promoter (<=1kb)	chr11	95271853	95310246	38394	-	217127	uc007lad.2	554	ENSMUSG00000038909	Kat7	K(lysine) acetyltransferase 7
1538	chr11	95384831	95384870	40	*	2.62803e-05	0.285846	0.00637556	0.27947	Promoter (<=1kb)	chr11	95384922	95391652	6731	+	110172	uc007lah.1	-91	ENSMUSG00000020873	Slc35b1	solute carrier family 35, member B1
1539	chr11	95384957	95385004	48	*	3.66612e-07	7.81296e-05	0.0124387	-0.0123606	Promoter (<=1kb)	chr11	95384922	95391652	6731	+	110172	uc007lah.1	82	ENSMUSG00000020873	Slc35b1	solute carrier family 35, member B1
1540	chr11	95713184	95713227	44	*	1.47884e-09	0.00238528	2.51577e-05	0.00236012	Promoter (<=1kb)	chr11	95713008	95835115	122108	+	237928	uc007lap.1	219	ENSMUSG00000050860	Phospho1	phosphatase, orphan 1
1541	chr11	96064802	96064818	17	*	4.46229e-14	0.346763	0.000367087	0.346396	Promoter (<=1kb)	chr11	96047431	96065364	17934	-	268470	uc007lbd.2	546	ENSMUSG00000014349	Ube2z	ubiquitin-conjugating enzyme E2Z (putative)
1542	chr11	96065226	96065345	120	*	1.33896e-07	0.00371711	0.332269	-0.328552	Promoter (<=1kb)	chr11	96047431	96065364	17934	-	268470	uc007lbd.2	19	ENSMUSG00000014349	Ube2z	ubiquitin-conjugating enzyme E2Z (putative)
1543	chr11	96065352	96065352	1	*	1.2096e-07	0.00134443	2.4036e-05	0.0013204	Promoter (<=1kb)	chr11	96047431	96065364	17934	-	268470	uc007lbd.2	12	ENSMUSG00000014349	Ube2z	ubiquitin-conjugating enzyme E2Z (putative)
1544	chr11	96286304	96286346	43	*	0.000324134	0.108016	0.197192	-0.0890551	Promoter (<=1kb)	chr11	96286646	96290163	3518	+	15415	uc007lbr.1	-342	ENSMUSG00000038721	Hoxb7	homeobox B7
1545	chr11	96447944	96447991	48	*	6.75384e-05	0.605079	0.767778	-0.162699	Exon (uc011ydh.1/100038600, exon 3 of 3)	chr11	96446899	96464547	17649	-	100038600	uc011ydh.1	16556	#N/A	Gm11529	predicted gene 11529
1546	chr11	96978158	96978214	57	*	1.12197e-05	0.00653582	0.310492	-0.303914	Promoter (<=1kb)	chr11	96953338	96977688	24351	-	78912	uc007ldf.1	-470	ENSMUSG00000018678	Sp2	Sp2 transcription factor
1547	chr11	97041735	97041780	46	*	3.6207e-07	0.0162622	0.000142692	0.0161195	Promoter (<=1kb)	chr11	97041586	97049213	7628	+	107732	uc007ldm.1	194	ENSMUSG00000001445	Mrpl10	mitochondrial ribosomal protein L10
1548	chr11	97198144	97198185	42	*	4.24383e-05	0.619909	0.840406	-0.220497	Distal Intergenic	chr11	97159710	97187892	28183	-	16211	uc007ldu.1	-10252	ENSMUSG00000001440	Kpnb1	karyopherin (importin) beta 1
1549	chr11	97404413	97404430	18	*	9.08298e-08	4.02314e-05	0.00311706	-0.00307856	Distal Intergenic	chr11	97362551	97398542	35992	+	192157	uc007lea.1	41879	ENSMUSG00000038485	Socs7	suppressor of cytokine signaling 7
1550	chr11	97428413	97428507	95	*	8.35761e-09	0.00922345	5.25941e-05	0.00916793	Distal Intergenic	chr11	97450160	97502400	52241	+	58996	uc007lec.1	-21747	ENSMUSG00000049807	Arhgap23	Rho GTPase activating protein 23
1551	chr11	97535009	97535057	49	*	3.37692e-05	0.000595845	0.0330298	-0.032434	Exon (uc007lee.1/56013, exon 8 of 20)	chr11	97490783	97500340	9558	-	100141474	uc033fzq.1	-34669	ENSMUSG00000047988	4933428G20Rik	RIKEN cDNA 4933428G20 gene
1552	chr11	97635685	97635720	36	*	6.56377e-06	0.80296	0.682707	0.120253	Distal Intergenic	chr11	97627387	97629716	2330	-	103551	uc007leg.1	-5969	ENSMUSG00000043439	E130012A19Rik	RIKEN cDNA E130012A19 gene
1553	chr11	97663203	97663311	109	*	1.46464e-07	0.00383806	0.338041	-0.334203	Promoter (<=1kb)	chr11	97663412	97685458	22047	+	246198	uc007lei.1	-209	ENSMUSG00000038437	Mllt6	myeloid/lymphoid or mixed-lineage leukemia (trithorax homolog, Drosophila); translocated to, 6
1554	chr11	97700547	97700657	111	*	1.615e-09	0.000105708	0.0129165	-0.01265	Promoter (<=1kb)	chr11	97688823	97700497	11675	-	22658	uc007len.2	-50	ENSMUSG00000018537	Pcgf2	polycomb group ring finger 2
1555	chr11	97719742	97719742	1	*	2.3575e-10	0.900492	0.998049	-0.0975573	Exon (uc007leq.1/108083, exon 9 of 10)	chr11	97703434	97708064	4631	+	26446	uc007leo.1	16308	ENSMUSG00000069744	Psmb3	proteasome (prosome, macropain) subunit, beta type 3
1556	chr11	97745188	97745316	129	*	2.5516e-06	0.302983	0.00511622	0.297756	Promoter (<=1kb)	chr11	97744897	97745035	139	+	102466256	uc033fzt.1	419	ENSMUSG00000098919	Mir8102	microRNA 8102
1557	chr11	97766230	97766230	1	*	1.92151e-06	0.268675	0.00354282	0.265132	Promoter (<=1kb)	chr11	97745470	97766613	21144	-	67480	uc007ler.2	383	ENSMUSG00000018541	Cwc25	CWC25 spliceosome-associated protein homolog (S. cerevisiae)
1558	chr11	97766573	97766637	65	*	2.30785e-10	3.13337e-05	0.00655915	-0.00652782	Promoter (<=1kb)	chr11	97745470	97766613	21144	-	67480	uc007ler.2	0	ENSMUSG00000018541	Cwc25	CWC25 spliceosome-associated protein homolog (S. cerevisiae)
1559	chr11	97781964	97782045	82	*	9.57591e-08	0.00297558	3.00632e-05	0.00293688	Promoter (<=1kb)	chr11	97781639	97781766	128	-	100302498	uc011ydw.1	-198	#N/A	Snora21	small nucleolar RNA, H/ACA box 21
1560	chr11	97800787	97800873	87	*	2.68662e-06	0.26046	0.00396032	0.256568	Promoter (1-2kb)	chr11	97799672	97838764	39093	+	16796	uc007lew.1	1201	ENSMUSG00000038366	Lasp1	LIM and SH3 protein 1
1561	chr11	98026675	98026693	19	*	0.000443355	0.0431133	0.0012216	0.0418917	Promoter (<=1kb)	chr11	98026710	98030493	3784	+	19921	uc007lfk.2	-35	ENSMUSG00000017404	Rpl19	ribosomal protein L19
1562	chr11	98149730	98149972	243	*	9.97938e-09	0.00233979	0.338783	-0.335911	Promoter (<=1kb)	chr11	98082554	98149616	67063	-	72194	uc007lfm.1	-114	ENSMUSG00000020883	Fbxl20	F-box and leucine-rich repeat protein 20
1563	chr11	98314170	98314170	1	*	0.000571192	0.00311024	0.000117053	0.00299319	Distal Intergenic	chr11	98325417	98329645	4229	-	18013	uc009vai.1	15475	ENSMUSG00000038255	Neurod2	neurogenic differentiation 2
1564	chr11	98348795	98348795	1	*	5.62239e-08	0.332939	0.00308513	0.329853	Promoter (<=1kb)	chr11	98348738	98357795	9058	+	19049	uc007lfz.1	57	ENSMUSG00000061718	Ppp1r1b	protein phosphatase 1, regulatory (inhibitor) subunit 1B
1565	chr11	98348806	98348872	67	*	5.70364e-14	2.83506e-05	0.00671553	-0.00668755	Promoter (<=1kb)	chr11	98348738	98357795	9058	+	19049	uc007lfz.1	134	ENSMUSG00000061718	Ppp1r1b	protein phosphatase 1, regulatory (inhibitor) subunit 1B
1566	chr11	98400410	98400441	32	*	9.50809e-08	0.275949	0.00242297	0.27356	Promoter (<=1kb)	chr11	98388672	98400490	11819	-	320655	uc007lgh.1	49	ENSMUSG00000038208	Pgap3	post-GPI attachment to proteins 3
1567	chr11	98412451	98412582	132	*	8.83925e-10	0.34212	0.00174497	0.340375	Promoter (<=1kb)	chr11	98412484	98437716	25233	+	13866	uc007lgi.1	0	ENSMUSG00000062312	Erbb2	v-erb-b2 erythroblastic leukemia viral oncogene homolog 2, neuro/glioblastoma derived oncogene homolog (avian)
1568	chr11	98412601	98412603	3	*	0.000383219	0.000161478	0.00534198	-0.00518051	Promoter (<=1kb)	chr11	98412484	98437716	25233	+	13866	uc007lgi.1	119	ENSMUSG00000062312	Erbb2	v-erb-b2 erythroblastic leukemia viral oncogene homolog 2, neuro/glioblastoma derived oncogene homolog (avian)
1569	chr11	98412604	98412609	6	*	3.40489e-09	0.343863	0.00214679	0.341716	Promoter (<=1kb)	chr11	98412484	98437716	25233	+	13866	uc007lgi.1	125	ENSMUSG00000062312	Erbb2	v-erb-b2 erythroblastic leukemia viral oncogene homolog 2, neuro/glioblastoma derived oncogene homolog (avian)
1570	chr11	98412610	98412610	1	*	6.5359e-08	2.50823e-05	0.00210932	-0.00208424	Promoter (<=1kb)	chr11	98412484	98437716	25233	+	13866	uc007lgi.1	126	ENSMUSG00000062312	Erbb2	v-erb-b2 erythroblastic leukemia viral oncogene homolog 2, neuro/glioblastoma derived oncogene homolog (avian)
1571	chr11	98412611	98412611	1	*	2.78686e-09	0.344318	0.00209456	0.342224	Promoter (<=1kb)	chr11	98412484	98437716	25233	+	13866	uc007lgi.1	127	ENSMUSG00000062312	Erbb2	v-erb-b2 erythroblastic leukemia viral oncogene homolog 2, neuro/glioblastoma derived oncogene homolog (avian)
1572	chr11	98412614	98412615	2	*	5.69105e-08	2.46933e-05	0.00205173	-0.00202703	Promoter (<=1kb)	chr11	98412484	98437716	25233	+	13866	uc007lgi.1	131	ENSMUSG00000062312	Erbb2	v-erb-b2 erythroblastic leukemia viral oncogene homolog 2, neuro/glioblastoma derived oncogene homolog (avian)
1573	chr11	98623204	98623208	5	*	0.000694028	0.909108	0.957164	-0.0480563	Distal Intergenic	chr11	98626360	98638089	11730	+	450219	uc007lgs.1	-3156	ENSMUSG00000064224	Gsdma3	gasdermin A3
1574	chr11	98682783	98682858	76	*	1.12226e-05	0.00648435	0.29947	-0.292986	Promoter (<=1kb)	chr11	98682554	98692517	9964	+	22123	uc007lgw.1	304	ENSMUSG00000017221	Psmd3	proteasome (prosome, macropain) 26S subunit, non-ATPase, 3
1575	chr11	98682942	98683019	78	*	1.09187e-12	0.343745	0.000585438	0.343159	Promoter (<=1kb)	chr11	98682554	98692517	9964	+	22123	uc007lgw.1	465	ENSMUSG00000017221	Psmd3	proteasome (prosome, macropain) 26S subunit, non-ATPase, 3
1576	chr11	98741831	98741865	35	*	1.0006e-06	2.56529e-05	0.00196554	-0.00193988	Promoter (<=1kb)	chr11	98741873	98757695	15823	+	21833	uc007lhd.1	-42	ENSMUSG00000058756	Thra	thyroid hormone receptor alpha
1577	chr11	98742095	98742219	125	*	7.06449e-09	0.332918	0.00215961	0.331179	Promoter (<=1kb)	chr11	98741873	98757695	15823	+	21833	uc007lhd.1	346	ENSMUSG00000058756	Thra	thyroid hormone receptor alpha
1578	chr11	98750850	98750883	34	*	7.88302e-05	0.257982	0.00777893	0.250203	Promoter (2-3kb)	chr11	98753290	98768403	15114	+	21833	uc007lhg.1	-2440	ENSMUSG00000058756	Thra	thyroid hormone receptor alpha
1579	chr11	98774094	98774094	1	*	6.03367e-05	0.000812752	0.0316641	-0.0308514	Promoter (1-2kb)	chr11	98767932	98775377	7446	-	217166	uc007lhh.2	1283	ENSMUSG00000020889	Nr1d1	nuclear receptor subfamily 1, group D, member 1
1580	chr11	98775291	98775398	108	*	3.38815e-07	0.339147	0.00628615	0.333673	Promoter (<=1kb)	chr11	98767932	98775377	7446	-	217166	uc007lhh.2	0	ENSMUSG00000020889	Nr1d1	nuclear receptor subfamily 1, group D, member 1
1581	chr11	98789312	98789389	78	*	3.42684e-06	0.24335	0.00319723	0.240153	Distal Intergenic	chr11	98795769	98801038	5270	+	74026	uc007lhi.2	-6457	ENSMUSG00000052915	Msl1	male-specific lethal 1 homolog (Drosophila)
1582	chr11	98795114	98795257	144	*	7.43394e-05	0.00659995	0.23728	-0.23068	Promoter (<=1kb)	chr11	98795769	98801038	5270	+	74026	uc007lhi.2	-655	ENSMUSG00000052915	Msl1	male-specific lethal 1 homolog (Drosophila)
1583	chr11	98795522	98795540	19	*	2.73555e-06	2.66811e-05	0.00187183	-0.00184515	Promoter (<=1kb)	chr11	98795769	98801038	5270	+	74026	uc007lhi.2	-247	ENSMUSG00000052915	Msl1	male-specific lethal 1 homolog (Drosophila)
1584	chr11	98795638	98795698	61	*	3.18985e-11	0.332247	0.000794664	0.331427	Promoter (<=1kb)	chr11	98795769	98801038	5270	+	74026	uc007lhi.2	-131	ENSMUSG00000052915	Msl1	male-specific lethal 1 homolog (Drosophila)
1585	chr11	98796100	98796100	1	*	0.000687456	0.00408028	0.000210473	0.00386981	Promoter (<=1kb)	chr11	98795769	98801038	5270	+	74026	uc007lhi.2	331	ENSMUSG00000052915	Msl1	male-specific lethal 1 homolog (Drosophila)
1586	chr11	98796259	98796337	79	*	0.000314203	0.00924485	0.226955	-0.214992	Promoter (<=1kb)	chr11	98795769	98801038	5270	+	74026	uc007lhi.2	568	ENSMUSG00000052915	Msl1	male-specific lethal 1 homolog (Drosophila)
1587	chr11	98809737	98809785	49	*	3.47119e-08	5.24718e-05	0.0122313	-0.0121805	Promoter (<=1kb)	chr11	98809808	98833807	24000	+	192160	uc011yeh.1	-71	ENSMUSG00000078676	Casc3	cancer susceptibility candidate 3
1588	chr11	98809951	98809989	39	*	2.47784e-10	0.00107957	0.319553	-0.318473	Promoter (<=1kb)	chr11	98798309	98810089	11781	-	100037262	uc007lhl.1	100	ENSMUSG00000075576	Gm12359	predicted gene 12359
1589	chr11	98810102	98810127	26	*	9.82129e-12	0.000650358	0.341338	-0.340688	Promoter (<=1kb)	chr11	98798309	98810089	11781	-	100037262	uc007lhl.1	-13	ENSMUSG00000075576	Gm12359	predicted gene 12359
1590	chr11	98936338	98936385	48	*	2.12914e-13	0.000472317	0.340449	-0.339993	Promoter (1-2kb)	chr11	98937696	98974942	37247	+	19401	uc007lhx.1	-1358	ENSMUSG00000037992	Rara	retinoic acid receptor, alpha
1591	chr11	99230922	99230997	76	*	1.41542e-07	0.00235406	0.269451	-0.267097	Promoter (<=1kb)	chr11	99209048	99231017	21970	-	57376	uc007lii.1	20	ENSMUSG00000037935	Smarce1	SWI/SNF related, matrix associated, actin dependent regulator of chromatin, subfamily e, member 1
1592	chr11	99385962	99386089	128	*	1.87718e-05	0.00720091	0.317167	-0.311039	Exon (uc007lir.2/16661, exon 7 of 8)	chr11	99385256	99389364	4109	-	16661	uc007lir.2	3275	ENSMUSG00000019761	Krt10	keratin 10
1593	chr11	100416000	100416046	47	*	1.05363e-08	0.00200123	0.332538	-0.330537	Promoter (<=1kb)	chr11	100415694	100424840	9147	+	14230	uc007llb.2	352	ENSMUSG00000001555	Fkbp10	FK506 binding protein 10
1594	chr11	100527856	100527870	15	*	9.06609e-11	0.342057	0.00100882	0.341048	Promoter (<=1kb)	chr11	100476352	100528000	51649	-	104112	uc007lll.2	130	ENSMUSG00000020917	Acly	ATP citrate lyase
1595	chr11	100528160	100528178	19	*	2.49041e-08	0.0026289	0.340984	-0.338337	Promoter (<=1kb)	chr11	100476352	100528000	51649	-	104112	uc007lll.2	-160	ENSMUSG00000020917	Acly	ATP citrate lyase
1596	chr11	100574887	100574933	47	*	3.23871e-07	2.88274e-05	0.00172182	-0.00169299	Promoter (<=1kb)	chr11	100574939	100581739	6801	+	12799	uc007llo.2	-52	ENSMUSG00000006782	Cnp	2',3'-cyclic nucleotide 3' phosphodiesterase
1597	chr11	100575178	100575178	1	*	5.46624e-05	0.000184643	0.00920573	-0.00902109	Promoter (<=1kb)	chr11	100574939	100581739	6801	+	12799	uc007llo.2	239	ENSMUSG00000006782	Cnp	2',3'-cyclic nucleotide 3' phosphodiesterase
1598	chr11	100623035	100623049	15	*	7.27741e-05	0.000506907	0.0304627	-0.0299558	Promoter (<=1kb)	chr11	100622955	100627602	4648	+	71966	uc007llu.1	94	ENSMUSG00000017837	Nkiras2	NFKB inhibitor interacting Ras-like protein 2
1599	chr11	100738317	100738321	5	*	3.24637e-10	0.00131612	0.345131	-0.343815	Promoter (<=1kb)	chr11	100715003	100738215	23213	-	19345	uc007lme.2	-102	ENSMUSG00000019173	Rab5c	RAB5C, member RAS oncogene family
1600	chr11	100738331	100738331	1	*	1.76791e-06	0.001692	2.57474e-05	0.00166625	Promoter (<=1kb)	chr11	100715003	100738215	23213	-	19345	uc007lme.2	-116	ENSMUSG00000019173	Rab5c	RAB5C, member RAS oncogene family
1601	chr11	100891972	100892006	35	*	0.0001511	0.881261	0.690748	0.190513	Intron (uc007lmo.1/20848, intron 3 of 23)	chr11	100860484	100877308	16825	+	20850	uc007lmn.1	31522	ENSMUSG00000004043	Stat5a	signal transducer and activator of transcription 5A
1602	chr11	100970341	100970443	103	*	0.000392203	0.00520673	0.196698	-0.191411	Promoter (<=1kb)	chr11	100956736	100970617	13882	-	19285	uc007lmr.2	174	ENSMUSG00000004044	Ptrf	polymerase I and transcript release factor
1603	chr11	100970589	100970593	5	*	0.000569851	0.00285955	0.000163359	0.00269619	Promoter (<=1kb)	chr11	100956736	100970617	13882	-	19285	uc007lmr.2	24	ENSMUSG00000004044	Ptrf	polymerase I and transcript release factor
1604	chr11	100970597	100970597	1	*	6.3449e-10	0.00146378	0.331719	-0.330255	Promoter (<=1kb)	chr11	100956736	100970617	13882	-	19285	uc007lmr.2	20	ENSMUSG00000004044	Ptrf	polymerase I and transcript release factor
1605	chr11	100970598	100970633	36	*	2.46309e-05	0.00110131	3.17947e-05	0.00106952	Promoter (<=1kb)	chr11	100956736	100970617	13882	-	19285	uc007lmr.2	0	ENSMUSG00000004044	Ptrf	polymerase I and transcript release factor
1606	chr11	100970660	100970671	12	*	1.581e-09	0.00153194	0.342015	-0.340368	Promoter (<=1kb)	chr11	100956736	100970617	13882	-	19285	uc007lmr.2	-43	ENSMUSG00000004044	Ptrf	polymerase I and transcript release factor
1607	chr11	101009463	101009481	19	*	4.59601e-05	0.000331898	0.012788	-0.0124561	Promoter (<=1kb)	chr11	101009452	101044823	35372	+	11975	uc029rof.1	29	ENSMUSG00000019302	Atp6v0a1	ATPase, H+ transporting, lysosomal V0 subunit A1
1608	chr11	101095194	101095424	231	*	9.72673e-08	0.00027206	0.214471	-0.203903	Promoter (<=1kb)	chr11	101092141	101095386	3246	-	19183	uc011yfh.2	0	ENSMUSG00000019303	Psmc3ip	proteasome (prosome, macropain) 26S subunit, ATPase 3, interacting protein
1609	chr11	101278923	101278949	27	*	0.000157137	0.00819525	0.227048	-0.218853	Promoter (<=1kb)	chr11	101277970	101278948	979	-	52469	uc007log.1	0	ENSMUSG00000017188	Coa3	cytochrome C oxidase assembly factor 3
1610	chr11	101425215	101425215	1	*	1.16584e-06	0.00705634	7.19748e-05	0.00698436	Promoter (<=1kb)	chr11	101418814	101425333	6520	-	73635	uc007lot.1	118	ENSMUSG00000097487	Ptges3l	prostaglandin E synthase 3 (cytosolic)-like
1611	chr11	101425429	101425505	77	*	9.17013e-30	4.41564e-05	0.0165648	-0.0165219	Promoter (<=1kb)	chr11	101418814	101425333	6520	-	73635	uc007lot.1	-96	ENSMUSG00000097487	Ptges3l	prostaglandin E synthase 3 (cytosolic)-like
1612	chr11	101468627	101468738	112	*	0.00070643	0.00564631	0.000199653	0.00544665	Promoter (<=1kb)	chr11	101468338	101471306	2969	+	11858	uc007lpb.1	400	ENSMUSG00000001313	Rnd2	Rho family GTPase 2
1613	chr11	101582186	101582223	38	*	0.00029863	0.239703	0.00602606	0.233677	Promoter (<=1kb)	chr11	101582242	101591785	9544	+	217203	uc007lpl.1	-56	ENSMUSG00000034947	Tmem106a	transmembrane protein 106A
1614	chr11	101733012	101733012	1	*	0.000412699	2.28723e-05	2.28723e-05	-2.57498e-19	Promoter (<=1kb)	chr11	101732956	101767357	34402	+	217207	uc007lpr.1	56	ENSMUSG00000034931	Dhx8	DEAH (Asp-Glu-Ala-His) box polypeptide 8
1615	chr11	101784398	101784505	108	*	0.00012742	0.0128806	0.272082	-0.259202	Promoter (<=1kb)	chr11	101769742	101784347	14606	-	18612	uc007lps.1	-51	ENSMUSG00000017724	Etv4	ets variant 4
1616	chr11	101784510	101784516	7	*	0.000633841	0.0209232	0.000942586	0.0199807	Promoter (<=1kb)	chr11	101769742	101784347	14606	-	18612	uc007lps.1	-163	ENSMUSG00000017724	Etv4	ets variant 4
1617	chr11	101784539	101784540	2	*	7.85832e-06	0.012542	0.328148	-0.315606	Promoter (<=1kb)	chr11	101769742	101784347	14606	-	18612	uc007lps.1	-192	ENSMUSG00000017724	Etv4	ets variant 4
1618	chr11	101784579	101784579	1	*	3.03258e-22	0.0102436	2.74627e-05	0.0102162	Promoter (<=1kb)	chr11	101769742	101784347	14606	-	18612	uc007lps.1	-232	ENSMUSG00000017724	Etv4	ets variant 4
1619	chr11	101784603	101784616	14	*	1.34977e-07	0.00487131	0.345616	-0.340745	Promoter (<=1kb)	chr11	101774403	101784848	10446	-	18612	uc007lpw.1	232	ENSMUSG00000017724	Etv4	ets variant 4
1620	chr11	102156443	102156446	4	*	0.000572336	0.125469	0.00574488	0.119798	Promoter (<=1kb)	chr11	102152547	102156407	3861	-	76547	uc007lqr.2	-36	ENSMUSG00000020921	Tmem101	transmembrane protein 101
1621	chr11	102185259	102185304	46	*	4.96318e-05	0.0003918	2.3002e-05	0.000368798	Promoter (<=1kb)	chr11	102163489	102185256	21768	-	268490	uc007lqs.1	-3	ENSMUSG00000020922	Lsm12	LSM12 homolog (S. cerevisiae)
1622	chr11	102248939	102249065	127	*	5.33095e-05	0.000498369	0.0202651	-0.0197032	Promoter (<=1kb)	chr11	102248882	102265183	16302	+	217216	uc007lqz.1	183	ENSMUSG00000034773	BC030867	cDNA sequence BC030867
1623	chr11	102249172	102249194	23	*	2.43178e-10	0.00126947	0.343531	-0.342262	Promoter (<=1kb)	chr11	102248882	102265183	16302	+	217216	uc007lqz.1	312	ENSMUSG00000034773	BC030867	cDNA sequence BC030867
1624	chr11	102284921	102284980	60	*	2.01069e-06	0.00685204	0.333001	-0.326149	Promoter (<=1kb)	chr11	102284939	102289427	4489	+	72053	uc007lrd.2	0	ENSMUSG00000034757	Tmub2	transmembrane and ubiquitin-like domain containing 2
1625	chr11	102296268	102296306	39	*	2.22968e-10	0.00120136	0.33531	-0.334108	Promoter (<=1kb)	chr11	102289300	102296629	7330	-	217218	uc007lrg.1	323	ENSMUSG00000059995	Atxn7l3	ataxin 7-like 3
1626	chr11	102316906	102316916	11	*	9.00212e-10	0.00137633	0.333942	-0.332566	Promoter (<=1kb)	chr11	102313609	102316705	3097	-	21429	uc007lro.1	-201	ENSMUSG00000020923	Ubtf	upstream binding transcription factor, RNA polymerase I
1627	chr11	102317005	102317057	53	*	2.46817e-10	0.342023	0.00131993	0.340494	Promoter (<=1kb)	chr11	102304563	102317287	12725	-	21429	uc007lrk.2	230	ENSMUSG00000020923	Ubtf	upstream binding transcription factor, RNA polymerase I
1628	chr11	102317064	102317064	1	*	1.07206e-08	2.8223e-05	0.00301067	-0.00298244	Promoter (<=1kb)	chr11	102304563	102317287	12725	-	21429	uc007lrk.2	223	ENSMUSG00000020923	Ubtf	upstream binding transcription factor, RNA polymerase I
1629	chr11	102317071	102317088	18	*	1.39184e-07	0.336378	0.00428775	0.33209	Promoter (<=1kb)	chr11	102304563	102317287	12725	-	21429	uc007lrk.2	199	ENSMUSG00000020923	Ubtf	upstream binding transcription factor, RNA polymerase I
1630	chr11	102317095	102317096	2	*	1.06764e-07	4.40869e-05	0.0058078	-0.00576372	Promoter (<=1kb)	chr11	102304563	102317287	12725	-	21429	uc007lrk.2	191	ENSMUSG00000020923	Ubtf	upstream binding transcription factor, RNA polymerase I
1631	chr11	102317112	102317119	8	*	0.000446757	0.262684	0.0124113	0.250272	Promoter (<=1kb)	chr11	102304563	102317287	12725	-	21429	uc007lrk.2	168	ENSMUSG00000020923	Ubtf	upstream binding transcription factor, RNA polymerase I
1632	chr11	102317335	102317335	1	*	2.40881e-08	0.00313825	0.345457	-0.342319	Promoter (<=1kb)	chr11	102304563	102317287	12725	-	21429	uc007lrk.2	-48	ENSMUSG00000020923	Ubtf	upstream binding transcription factor, RNA polymerase I
1633	chr11	102318235	102318295	61	*	4.30796e-10	0.344313	0.00189356	0.34242	Promoter (<=1kb)	chr11	102308894	102317654	8761	-	21429	uc007lrn.1	-581	ENSMUSG00000020923	Ubtf	upstream binding transcription factor, RNA polymerase I
1634	chr11	102318304	102318328	25	*	0.000486466	0.000134184	0.00316081	-0.00302662	Promoter (<=1kb)	chr11	102308894	102317654	8761	-	21429	uc007lrn.1	-650	ENSMUSG00000020923	Ubtf	upstream binding transcription factor, RNA polymerase I
1635	chr11	102318679	102318686	8	*	6.34395e-05	0.26595	0.00875068	0.257199	Promoter (<=1kb)	chr11	102304563	102319096	14534	-	21429	uc007lrl.2	410	ENSMUSG00000020923	Ubtf	upstream binding transcription factor, RNA polymerase I
1636	chr11	102318849	102318874	26	*	9.24178e-11	2.54318e-05	0.00317421	-0.00314878	Promoter (<=1kb)	chr11	102304563	102319096	14534	-	21429	uc007lrl.2	222	ENSMUSG00000020923	Ubtf	upstream binding transcription factor, RNA polymerase I
1637	chr11	102319068	102319076	9	*	1.18863e-09	0.329366	0.00134321	0.328023	Promoter (<=1kb)	chr11	102304563	102319096	14534	-	21429	uc007lrl.2	20	ENSMUSG00000020923	Ubtf	upstream binding transcription factor, RNA polymerase I
1638	chr11	102393547	102393547	1	*	2.23398e-06	0.000432429	0.101212	-0.10078	Promoter (<=1kb)	chr11	102393403	102402939	9537	+	51799	uc007lrq.3	144	ENSMUSG00000006575	Rundc3a	RUN domain containing 3A
1639	chr11	102393645	102393645	1	*	6.29413e-14	0.336358	0.00030547	0.336053	Promoter (<=1kb)	chr11	102393403	102402939	9537	+	51799	uc007lrq.3	242	ENSMUSG00000006575	Rundc3a	RUN domain containing 3A
1640	chr11	102399210	102399226	17	*	0.00016305	0.276415	0.461468	-0.185053	Promoter (<=1kb)	chr11	102399167	102402939	3773	+	51799	uc007lrs.3	59	ENSMUSG00000006575	Rundc3a	RUN domain containing 3A
1641	chr11	102447369	102447495	127	*	1.60423e-06	0.321431	0.00624937	0.315182	Promoter (<=1kb)	chr11	102436981	102447663	10683	-	217219	uc007lrw.2	168	ENSMUSG00000034685	Fam171a2	family with sequence similarity 171, member A2
1642	chr11	102467171	102467277	107	*	5.69136e-09	0.3318	0.00197618	0.329824	Promoter (<=1kb)	chr11	102456472	102467199	10728	-	16399	uc007lsa.1	0	ENSMUSG00000034664	Itga2b	integrin alpha 2b
1643	chr11	102591620	102591621	2	*	0.000573159	0.536678	0.720859	-0.184182	Distal Intergenic	chr11	102576399	102579119	2721	-	100040792	uc007lsd.1	-12501	ENSMUSG00000078640	Gm11627	predicted gene 11627
1644	chr11	102605221	102605247	27	*	6.66866e-05	0.00682084	0.000169757	0.00665108	Promoter (<=1kb)	chr11	102604431	102608058	3628	+	57265	uc011yft.1	816	ENSMUSG00000050288	Fzd2	frizzled homolog 2 (Drosophila)
1645	chr11	102761353	102761413	61	*	8.6109e-07	5.56278e-05	0.00594312	-0.00588749	Promoter (<=1kb)	chr11	102761439	102780262	18824	+	11488	uc007lsi.2	-86	ENSMUSG00000020926	Adam11	a disintegrin and metallopeptidase domain 11
1646	chr11	102819025	102819032	8	*	5.15529e-09	0.345772	0.0031251	0.342647	Promoter (<=1kb)	chr11	102799478	102819159	19682	-	14615	uc007lsl.2	127	ENSMUSG00000034520	Gjc1	gap junction protein, gamma 1
1647	chr11	102819063	102819074	12	*	0.000534598	0.000266859	0.00421169	-0.00397065	Promoter (<=1kb)	chr11	102799478	102819159	19682	-	14615	uc007lsl.2	85	ENSMUSG00000034520	Gjc1	gap junction protein, gamma 1
1648	chr11	102819249	102819292	44	*	1.72441e-07	2.57159e-05	0.00180376	-0.00177822	Promoter (<=1kb)	chr11	102799478	102819159	19682	-	14615	uc007lsl.2	-90	ENSMUSG00000034520	Gjc1	gap junction protein, gamma 1
1649	chr11	102819347	102819363	17	*	9.84072e-07	0.000842359	2.48456e-05	0.000817513	Promoter (<=1kb)	chr11	102799478	102819159	19682	-	14615	uc007lsl.2	-188	ENSMUSG00000034520	Gjc1	gap junction protein, gamma 1
1650	chr11	102819371	102819371	1	*	6.30983e-05	0.00334076	0.16454	-0.161199	Promoter (<=1kb)	chr11	102799478	102819159	19682	-	14615	uc007lsl.2	-212	ENSMUSG00000034520	Gjc1	gap junction protein, gamma 1
1651	chr11	102819372	102819372	1	*	1.69969e-07	0.00185534	2.63746e-05	0.00182896	Promoter (<=1kb)	chr11	102799478	102819159	19682	-	14615	uc007lsl.2	-213	ENSMUSG00000034520	Gjc1	gap junction protein, gamma 1
1652	chr11	102819373	102819373	1	*	2.13625e-09	0.00193197	0.342075	-0.340143	Promoter (<=1kb)	chr11	102799478	102819159	19682	-	14615	uc007lsl.2	-214	ENSMUSG00000034520	Gjc1	gap junction protein, gamma 1
1653	chr11	102819374	102819374	1	*	1.53562e-07	0.00201146	2.68359e-05	0.00198462	Promoter (<=1kb)	chr11	102799478	102819159	19682	-	14615	uc007lsl.2	-215	ENSMUSG00000034520	Gjc1	gap junction protein, gamma 1
1654	chr11	102819375	102819381	7	*	4.54527e-09	0.00217254	0.341225	-0.339053	Promoter (<=1kb)	chr11	102799478	102819159	19682	-	14615	uc007lsl.2	-216	ENSMUSG00000034520	Gjc1	gap junction protein, gamma 1
1655	chr11	102819382	102819382	1	*	8.91542e-08	0.0026648	2.80464e-05	0.00263676	Promoter (<=1kb)	chr11	102799478	102819159	19682	-	14615	uc007lsl.2	-223	ENSMUSG00000034520	Gjc1	gap junction protein, gamma 1
1656	chr11	103115268	103115341	74	*	1.06061e-07	0.34389	0.00446198	0.339434	Promoter (1-2kb)	chr11	103116325	103119724	3400	+	192231	uc007lto.1	-1057	ENSMUSG00000048878	Hexim1	hexamethylene bis-acetamide inducible 1
1657	chr11	103132317	103132449	133	*	5.19931e-12	3.6099e-05	0.00772717	-0.00769107	Promoter (1-2kb)	chr11	103133339	103139908	6570	+	71059	uc007ltp.2	-1022	ENSMUSG00000043372	Hexim2	hexamethylene bis-acetamide inducible 2
1658	chr11	103132819	103132829	11	*	3.98106e-06	2.37208e-05	0.00101835	-0.000994631	Promoter (<=1kb)	chr11	103133339	103139908	6570	+	71059	uc007ltp.2	-520	ENSMUSG00000043372	Hexim2	hexamethylene bis-acetamide inducible 2
1659	chr11	103132915	103132940	26	*	1.36982e-06	0.00158671	2.48087e-05	0.00156193	Promoter (<=1kb)	chr11	103133339	103139908	6570	+	71059	uc007ltp.2	-424	ENSMUSG00000043372	Hexim2	hexamethylene bis-acetamide inducible 2
1660	chr11	103218312	103218330	19	*	2.78913e-08	2.47271e-05	0.00307494	-0.00305021	Promoter (<=1kb)	chr11	103208127	103218432	10306	-	328019	uc007ltz.1	102	ENSMUSG00000044787	Spata32	spermatogenesis associated 32
1661	chr11	103267054	103267123	70	*	0.000128353	0.000495241	0.0170508	-0.0165556	Promoter (<=1kb)	chr11	103219764	103267401	47638	-	53859	uc007lua.1	278	ENSMUSG00000020941	Map3k14	mitogen-activated protein kinase kinase kinase 14
1662	chr11	103267579	103267685	107	*	5.57548e-06	0.00687405	0.275917	-0.269043	Promoter (<=1kb)	chr11	103219764	103267401	47638	-	53859	uc007lua.1	-178	ENSMUSG00000020941	Map3k14	mitogen-activated protein kinase kinase kinase 14
1663	chr11	103361585	103361594	10	*	0.000222796	0.0342907	0.298509	-0.264393	Promoter (2-3kb)	chr11	103331484	103363692	32209	-	544817	uc029roj.1	2098	ENSMUSG00000034255	Arhgap27	Rho GTPase activating protein 27
1664	chr11	103721839	103721868	30	*	0.000591152	0.00027774	0.00770776	-0.00743002	Intron (uc007lvp.1/399609, intron 2 of 2)	chr11	103697724	103705669	7946	+	399609	uc033gau.1	24144	#N/A	C130046K22Rik	RIKEN cDNA C130046K22 gene
1665	chr11	103772242	103772259	18	*	6.49605e-06	0.00572888	0.293011	-0.287215	Promoter (1-2kb)	chr11	103774175	103818021	43847	+	22415	uc007lvs.2	-1933	ENSMUSG00000000125	Wnt3	wingless-type MMTV integration site family, member 3
1666	chr11	103953601	103953625	25	*	0.00157721	0.233951	0.00901183	0.224939	Promoter (<=1kb)	chr11	103821783	103954056	132274	-	18195	uc007lvt.1	431	ENSMUSG00000034187	Nsf	N-ethylmaleimide sensitive fusion protein
1667	chr11	103953860	103953937	78	*	6.09768e-05	2.51597e-05	0.000496547	-0.000471422	Promoter (<=1kb)	chr11	103821783	103954056	132274	-	18195	uc007lvt.1	119	ENSMUSG00000034187	Nsf	N-ethylmaleimide sensitive fusion protein
1668	chr11	104132398	104132445	48	*	0.000191892	0.00015926	0.00492068	-0.00476957	Promoter (<=1kb)	chr11	104132882	104175518	42637	+	12921	uc007lvz.1	-484	ENSMUSG00000018634	Crhr1	corticotropin releasing hormone receptor 1
1669	chr11	104132878	104132894	17	*	0.00268242	0.00209033	0.0315549	-0.0294634	Promoter (<=1kb)	chr11	104132882	104175518	42637	+	12921	uc007lvz.1	0	ENSMUSG00000018634	Crhr1	corticotropin releasing hormone receptor 1
1670	chr11	104158128	104158148	21	*	5.9593e-06	0.00102689	0.052616	-0.0515891	Intron (uc007lvz.1/12921, intron 2 of 12)	chr11	104153521	104169953	16433	+	12921	uc007lwb.1	4627	ENSMUSG00000018634	Crhr1	corticotropin releasing hormone receptor 1
1671	chr11	104231408	104231441	34	*	9.0195e-06	0.000726943	2.33351e-05	0.000703608	Promoter (<=1kb)	chr11	104231436	104295317	63882	+	17762	uc007lwe.1	0	ENSMUSG00000018411	Mapt	microtubule-associated protein tau
1672	chr11	104441983	104441983	1	*	1.58251e-10	0.0037877	2.54498e-05	0.00376225	Promoter (<=1kb)	chr11	104333229	104442291	109063	-	76719	uc007lwj.1	308	ENSMUSG00000018412	Kansl1	KAT8 regulatory NSL complex subunit 1
1673	chr11	104442086	104442116	31	*	1.185e-15	0.346983	0.00022819	0.346755	Promoter (<=1kb)	chr11	104333229	104442291	109063	-	76719	uc007lwj.1	175	ENSMUSG00000018412	Kansl1	KAT8 regulatory NSL complex subunit 1
1674	chr11	104442175	104442194	20	*	0.000571625	0.0067117	0.125131	-0.11805	Promoter (<=1kb)	chr11	104333229	104442291	109063	-	76719	uc007lwj.1	97	ENSMUSG00000018412	Kansl1	KAT8 regulatory NSL complex subunit 1
1675	chr11	104442531	104442560	30	*	1.17378e-11	0.000808783	0.334955	-0.334151	Promoter (<=1kb)	chr11	104421060	104442706	21647	-	76719	uc007lwp.1	146	ENSMUSG00000018412	Kansl1	KAT8 regulatory NSL complex subunit 1
1676	chr11	104468932	104468959	28	*	1.76016e-11	0.000676703	0.39649	-0.395813	Promoter (<=1kb)	chr11	104333229	104468861	135633	-	76719	uc007lwk.1	-71	ENSMUSG00000018412	Kansl1	KAT8 regulatory NSL complex subunit 1
1677	chr11	104468965	104468979	15	*	3.60143e-07	0.000862116	2.31217e-05	0.000838994	Promoter (<=1kb)	chr11	104333229	104468861	135633	-	76719	uc007lwk.1	-104	ENSMUSG00000018412	Kansl1	KAT8 regulatory NSL complex subunit 1
1678	chr11	104469247	104469265	19	*	8.54694e-11	0.00116743	0.346892	-0.345724	Promoter (<=1kb)	chr11	104354576	104469434	114859	-	76719	uc007lwn.1	169	ENSMUSG00000018412	Kansl1	KAT8 regulatory NSL complex subunit 1
1679	chr11	105182038	105182044	7	*	1.24992e-08	0.00783356	3.19736e-05	0.00780159	Promoter (<=1kb)	chr11	105181527	105276873	95347	+	24086	uc007lxd.3	517	ENSMUSG00000020694	Tlk2	tousled-like kinase 2 (Arabidopsis)
1680	chr11	105182047	105182047	1	*	1.06134e-05	0.00839916	0.333203	-0.324803	Promoter (<=1kb)	chr11	105181527	105276873	95347	+	24086	uc007lxd.3	520	ENSMUSG00000020694	Tlk2	tousled-like kinase 2 (Arabidopsis)
1681	chr11	105182074	105182074	1	*	7.00052e-08	0.0118243	5.13822e-05	0.0117729	Promoter (<=1kb)	chr11	105181527	105276873	95347	+	24086	uc007lxd.3	547	ENSMUSG00000020694	Tlk2	tousled-like kinase 2 (Arabidopsis)
1682	chr11	105182084	105182084	1	*	0.000174218	0.0132893	0.312845	-0.299555	Promoter (<=1kb)	chr11	105181527	105276873	95347	+	24086	uc007lxd.3	557	ENSMUSG00000020694	Tlk2	tousled-like kinase 2 (Arabidopsis)
1683	chr11	105182087	105182087	1	*	5.96437e-08	0.0138564	5.47017e-05	0.0138017	Promoter (<=1kb)	chr11	105181527	105276873	95347	+	24086	uc007lxd.3	560	ENSMUSG00000020694	Tlk2	tousled-like kinase 2 (Arabidopsis)
1684	chr11	105182290	105182367	78	*	7.69043e-12	0.343124	0.000774897	0.342349	Promoter (<=1kb)	chr11	105181527	105276873	95347	+	24086	uc007lxd.3	840	ENSMUSG00000020694	Tlk2	tousled-like kinase 2 (Arabidopsis)
1685	chr11	105311602	105311646	45	*	0.000501998	0.0081003	0.0995224	-0.0914221	Intron (uc007lxh.1/17534, intron 1 of 19)	chr11	105292646	105343871	51226	+	17534	uc007lxh.1	19000	ENSMUSG00000020695	Mrc2	mannose receptor, C type 2
1686	chr11	105589326	105589330	5	*	0.000272857	0.314439	0.0152924	0.299147	Promoter (<=1kb)	chr11	105589986	105929303	339318	+	77097	uc007lxm.1	-660	ENSMUSG00000053580	Tanc2	tetratricopeptide repeat, ankyrin repeat and coiled-coil containing 2
1687	chr11	105589531	105589605	75	*	1.48495e-06	0.00138897	2.39876e-05	0.00136434	Promoter (<=1kb)	chr11	105589986	105929303	339318	+	77097	uc007lxm.1	-455	ENSMUSG00000053580	Tanc2	tetratricopeptide repeat, ankyrin repeat and coiled-coil containing 2
1688	chr11	105589660	105589662	3	*	1.54192e-06	2.3992e-05	0.00140249	-0.0013785	Promoter (<=1kb)	chr11	105589986	105929303	339318	+	77097	uc007lxm.1	-326	ENSMUSG00000053580	Tanc2	tetratricopeptide repeat, ankyrin repeat and coiled-coil containing 2
1689	chr11	105589670	105589687	18	*	2.2339e-09	0.344387	0.00179514	0.342592	Promoter (<=1kb)	chr11	105589986	105929303	339318	+	77097	uc007lxm.1	-316	ENSMUSG00000053580	Tanc2	tetratricopeptide repeat, ankyrin repeat and coiled-coil containing 2
1690	chr11	105589689	105589693	5	*	8.56521e-07	2.71546e-05	0.00242435	-0.0023972	Promoter (<=1kb)	chr11	105589986	105929303	339318	+	77097	uc007lxm.1	-297	ENSMUSG00000053580	Tanc2	tetratricopeptide repeat, ankyrin repeat and coiled-coil containing 2
1691	chr11	105589695	105589710	16	*	5.17623e-07	0.361755	0.00343607	0.358319	Promoter (<=1kb)	chr11	105589986	105929303	339318	+	77097	uc007lxm.1	-291	ENSMUSG00000053580	Tanc2	tetratricopeptide repeat, ankyrin repeat and coiled-coil containing 2
1692	chr11	106036921	106036929	9	*	2.94577e-14	0.346481	0.000316854	0.346164	Promoter (<=1kb)	chr11	106036872	106048644	11773	+	71833	uc007lxy.1	57	ENSMUSG00000049354	Dcaf7	DDB1 and CUL4 associated factor 7
1693	chr11	106037437	106037437	1	*	2.64906e-05	4.93375e-05	0.00197887	-0.00192953	Promoter (<=1kb)	chr11	106036872	106048644	11773	+	71833	uc007lxy.1	565	ENSMUSG00000049354	Dcaf7	DDB1 and CUL4 associated factor 7
1694	chr11	106066084	106066086	3	*	0.00120896	0.00797441	0.152252	-0.144277	Promoter (<=1kb)	chr11	106066107	106073612	7506	+	70207	uc007lyb.1	-23	ENSMUSG00000001983	Taco1	translational activator of mitochondrially encoded cytochrome c oxidase I
1695	chr11	106066314	106066323	10	*	1.84645e-08	2.4976e-05	0.00287773	-0.00285276	Promoter (<=1kb)	chr11	106066107	106073612	7506	+	70207	uc007lyb.1	216	ENSMUSG00000001983	Taco1	translational activator of mitochondrially encoded cytochrome c oxidase I
1696	chr11	106216496	106216542	47	*	1.10536e-06	0.00210641	2.99904e-05	0.00207642	Promoter (<=1kb)	chr11	106199356	106216367	17012	-	67163	uc007lyi.1	-129	ENSMUSG00000078622	Ccdc47	coiled-coil domain containing 47
1697	chr11	106272858	106272890	33	*	1.96289e-11	0.00083766	0.343338	-0.3425	Promoter (<=1kb)	chr11	106263171	106272972	9802	-	83796	uc007lyp.2	82	ENSMUSG00000078619	Smarcd2	SWI/SNF related, matrix associated, actin dependent regulator of chromatin, subfamily d, member 2
1698	chr11	106487726	106487808	83	*	1.06579e-06	0.0067778	0.33962	-0.332962	Promoter (<=1kb)	chr11	106397620	106487796	90177	-	78943	uc007lyy.1	0	ENSMUSG00000020715	Ern1	endoplasmic reticulum (ER) to nucleus signalling 1
1699	chr11	106787653	106787653	1	*	1.01633e-06	2.78777e-05	0.00245084	-0.00242296	Promoter (<=1kb)	chr11	106780356	106788494	8139	-	13207	uc007lzq.1	841	ENSMUSG00000020719	Ddx5	DEAD (Asp-Glu-Ala-Asp) box polypeptide 5
1700	chr11	106787657	106787657	1	*	1.59321e-08	0.341351	0.00240681	0.338944	Promoter (<=1kb)	chr11	106780356	106788494	8139	-	13207	uc007lzq.1	837	ENSMUSG00000020719	Ddx5	DEAD (Asp-Glu-Ala-Asp) box polypeptide 5
1701	chr11	106787660	106787660	1	*	7.97633e-07	2.66448e-05	0.00236232	-0.00233567	Promoter (<=1kb)	chr11	106780356	106788494	8139	-	13207	uc007lzq.1	834	ENSMUSG00000020719	Ddx5	DEAD (Asp-Glu-Ala-Asp) box polypeptide 5
1702	chr11	106787666	106787666	1	*	9.45392e-09	0.343014	0.00225349	0.340761	Promoter (<=1kb)	chr11	106780356	106788494	8139	-	13207	uc007lzq.1	828	ENSMUSG00000020719	Ddx5	DEAD (Asp-Glu-Ala-Asp) box polypeptide 5
1703	chr11	106787746	106787870	125	*	6.28247e-07	0.00405399	0.296731	-0.293395	Promoter (<=1kb)	chr11	106780356	106788494	8139	-	13207	uc007lzq.1	624	ENSMUSG00000020719	Ddx5	DEAD (Asp-Glu-Ala-Asp) box polypeptide 5
1704	chr11	106787974	106787999	26	*	1.84794e-05	0.00212844	4.12205e-05	0.00208728	Promoter (<=1kb)	chr11	106780356	106788494	8139	-	13207	uc007lzq.1	495	ENSMUSG00000020719	Ddx5	DEAD (Asp-Glu-Ala-Asp) box polypeptide 5
1705	chr11	106788533	106788685	153	*	2.09262e-13	0.000414064	0.344802	-0.34435	Promoter (<=1kb)	chr11	106780356	106788494	8139	-	13207	uc007lzq.1	-39	ENSMUSG00000020719	Ddx5	DEAD (Asp-Glu-Ala-Asp) box polypeptide 5
1706	chr11	106788689	106788689	1	*	4.10055e-07	0.00335139	2.82638e-05	0.00332313	Promoter (<=1kb)	chr11	106780356	106788865	8510	-	13207	uc007lzr.1	176	ENSMUSG00000020719	Ddx5	DEAD (Asp-Glu-Ala-Asp) box polypeptide 5
1707	chr11	106788700	106788700	1	*	6.39322e-08	0.00358001	0.346621	-0.343041	Promoter (<=1kb)	chr11	106780356	106788865	8510	-	13207	uc007lzr.1	165	ENSMUSG00000020719	Ddx5	DEAD (Asp-Glu-Ala-Asp) box polypeptide 5
1708	chr11	106789098	106789098	1	*	1.3747e-10	0.334865	0.000985515	0.333879	Promoter (<=1kb)	chr11	106789252	106818861	29610	+	320162	uc007lzu.2	-154	ENSMUSG00000018372	Cep95	centrosomal protein 95
1709	chr11	106789287	106789337	51	*	2.52144e-13	0.34208	0.000438022	0.341642	Promoter (<=1kb)	chr11	106789252	106818861	29610	+	320162	uc007lzu.2	85	ENSMUSG00000018372	Cep95	centrosomal protein 95
1710	chr11	106920095	106920134	40	*	5.30846e-06	0.00790952	7.2263e-05	0.00783684	Promoter (<=1kb)	chr11	106820064	106920715	100652	-	66313	uc007lzx.2	581	ENSMUSG00000018363	Smurf2	SMAD specific E3 ubiquitin protein ligase 2
1711	chr11	106920285	106920299	15	*	2.06032e-16	0.000159002	0.346332	-0.346194	Promoter (<=1kb)	chr11	106820064	106920715	100652	-	66313	uc007lzx.2	416	ENSMUSG00000018363	Smurf2	SMAD specific E3 ubiquitin protein ligase 2
1712	chr11	106920303	106920303	1	*	0.00043108	0.000246255	2.37678e-05	0.000222487	Promoter (<=1kb)	chr11	106820064	106920715	100652	-	66313	uc007lzx.2	412	ENSMUSG00000018363	Smurf2	SMAD specific E3 ubiquitin protein ligase 2
1713	chr11	106920307	106920330	24	*	9.09127e-13	0.000491142	0.342281	-0.34179	Promoter (<=1kb)	chr11	106820064	106920715	100652	-	66313	uc007lzx.2	385	ENSMUSG00000018363	Smurf2	SMAD specific E3 ubiquitin protein ligase 2
1714	chr11	106920331	106920333	3	*	9.69042e-05	0.00054819	2.68534e-05	0.000521337	Promoter (<=1kb)	chr11	106820064	106920715	100652	-	66313	uc007lzx.2	382	ENSMUSG00000018363	Smurf2	SMAD specific E3 ubiquitin protein ligase 2
1715	chr11	106920494	106920537	44	*	2.98731e-14	0.000259719	0.343632	-0.343373	Promoter (<=1kb)	chr11	106820064	106920715	100652	-	66313	uc007lzx.2	178	ENSMUSG00000018363	Smurf2	SMAD specific E3 ubiquitin protein ligase 2
1716	chr11	107547855	107547882	28	*	7.04641e-08	0.00283636	0.335075	-0.332063	Promoter (<=1kb)	chr11	107547960	107672287	124328	+	78455	uc007mau.1	-105	ENSMUSG00000020721	Helz	helicase with zinc finger domain
1717	chr11	108343221	108343338	118	*	1.04992e-07	0.34093	0.00522962	0.335518	Promoter (<=1kb)	chr11	107933387	108343888	410502	-	18750	uc011ygr.1	550	ENSMUSG00000050965	Prkca	protein kinase C, alpha
1718	chr11	108343604	108343817	214	*	9.60369e-11	0.00105368	0.341223	-0.339604	Promoter (<=1kb)	chr11	107933387	108343888	410502	-	18750	uc011ygr.1	71	ENSMUSG00000050965	Prkca	protein kinase C, alpha
1719	chr11	108344180	108344189	10	*	8.51544e-05	0.00983651	0.271707	-0.26187	Promoter (<=1kb)	chr11	107933387	108343888	410502	-	18750	uc011ygr.1	-292	ENSMUSG00000050965	Prkca	protein kinase C, alpha
1720	chr11	108921694	108921816	123	*	3.83845e-07	0.00239512	3.29265e-05	0.00236219	Promoter (1-2kb)	chr11	108920349	108950781	30433	+	12006	uc007mbu.2	1467	ENSMUSG00000000142	Axin2	axin2
1721	chr11	108922080	108922080	1	*	0.00154452	0.00698544	0.164009	-0.157023	Promoter (1-2kb)	chr11	108920349	108950781	30433	+	12006	uc007mbu.2	1731	ENSMUSG00000000142	Axin2	axin2
1722	chr11	108936730	108936730	1	*	0.000247392	0.114818	0.187378	-0.0725602	Intron (uc007mbu.2/12006, intron 3 of 10)	chr11	108943621	108950781	7161	+	12006	uc007mbv.1	-6891	ENSMUSG00000000142	Axin2	axin2
1723	chr11	109440084	109440133	50	*	5.61537e-07	0.309445	0.0058015	0.303644	Promoter (<=1kb)	chr11	109440078	109453359	13282	+	100503496	uc007mck.2	55	#N/A	LOC100503496	uncharacterized LOC100503496
1724	chr11	109611371	109611380	10	*	4.5576e-13	0.00999476	3.60295e-05	0.00995873	Promoter (<=1kb)	chr11	109573521	109611389	37869	-	52639	uc007mcq.1	9	ENSMUSG00000041895	Wipi1	WD repeat domain, phosphoinositide interacting 1
1725	chr11	110447072	110447080	9	*	2.85533e-06	0.851175	0.926833	-0.0758393	Intron (uc007mdr.1/26399, intron 1 of 11)	chr11	110479287	110497974	18688	+	26399	uc007mdt.1	-32215	ENSMUSG00000020623	Map2k6	mitogen-activated protein kinase kinase 6
1726	chr11	112781744	112781752	9	*	5.36165e-05	0.000170472	0.00580939	-0.00563892	Promoter (<=1kb)	chr11	112687643	112781976	94334	-	217294	uc007mec.1	224	ENSMUSG00000041674	BC006965	cDNA sequence BC006965
1727	chr11	112781986	112781988	3	*	1.08211e-16	0.000119018	0.345198	-0.345079	Promoter (<=1kb)	chr11	112687643	112781976	94334	-	217294	uc007mec.1	-10	ENSMUSG00000041674	BC006965	cDNA sequence BC006965
1728	chr11	112783862	112783864	3	*	0.000882182	0.0799445	0.162345	-0.0824005	Promoter (1-2kb)	chr11	112782210	112787757	5548	+	20682	uc007med.2	1654	ENSMUSG00000000567	Sox9	SRY (sex determining region Y)-box 9
1729	chr11	112886291	112886291	1	*	0.000614901	0.835404	0.899575	-0.0641708	Distal Intergenic	chr11	112822965	112825128	2164	-	76393	uc007mef.2	-61163	#N/A	1700012H19Rik	RIKEN cDNA 1700012H19 gene
1730	chr11	113201494	113201541	48	*	1.9088e-09	0.00195948	0.344194	-0.342235	Promoter (<=1kb)	chr11	113043906	113201838	157933	-	72386	uc007mei.2	297	ENSMUSG00000087259	2610035D17Rik	RIKEN cDNA 2610035D17 gene
1731	chr11	113649795	113649840	46	*	9.85362e-07	0.325264	0.00500782	0.320765	Promoter (<=1kb)	chr11	113244855	113650071	405217	-	69806	uc007meo.1	231	ENSMUSG00000041654	Slc39a11	solute carrier family 39 (metal ion transporter), member 11
1732	chr11	113649982	113650038	57	*	0.00014012	0.00361056	9.94561e-05	0.00351189	Promoter (<=1kb)	chr11	113244855	113650071	405217	-	69806	uc007meo.1	33	ENSMUSG00000041654	Slc39a11	solute carrier family 39 (metal ion transporter), member 11
1733	chr11	113751740	113751815	76	*	9.98705e-14	0.000362436	0.343031	-0.342668	Promoter (<=1kb)	chr11	113726850	113751815	24966	-	56699	uc007mfc.2	0	ENSMUSG00000041598	Cdc42ep4	CDC42 effector protein (Rho GTPase binding) 4
1734	chr11	114066862	114066885	24	*	3.26098e-07	0.00464576	0.321791	-0.317142	Promoter (<=1kb)	chr11	113780790	114065951	285162	-	237979	uc007mfe.1	-911	ENSMUSG00000041592	Sdk2	sidekick homolog 2 (chicken)
1735	chr11	114067149	114067161	13	*	0.00150932	0.00118008	0.0180897	-0.0170592	Promoter (1-2kb)	chr11	113780790	114065951	285162	-	237979	uc007mfe.1	-1198	ENSMUSG00000041592	Sdk2	sidekick homolog 2 (chicken)
1736	chr11	114727865	114727866	2	*	0.000882114	0.346721	0.511269	-0.164548	Promoter (<=1kb)	chr11	114727412	114757886	30475	+	432611	uc007mfn.1	454	ENSMUSG00000034706	Dnaic2	dynein, axonemal, intermediate chain 2
1737	chr11	115146616	115146634	19	*	0.000223636	0.529698	0.694785	-0.165087	Exon (uc007mgl.2/58222, exon 2 of 9)	chr11	115154178	115162240	8063	+	58222	uc007mgo.2	-7562	ENSMUSG00000020732	Rab37	RAB37, member RAS oncogene family
1738	chr11	115268615	115268642	28	*	0.000214809	0.855276	0.741674	0.113601	Promoter (1-2kb)	chr11	115249169	115267243	18075	-	14813	uc007mgx.1	-1372	ENSMUSG00000020734	Grin2c	glutamate receptor, ionotropic, NMDA2C (epsilon 3)
1739	chr11	115475520	115475611	92	*	6.12035e-07	2.37245e-05	0.000788314	-0.00076501	Promoter (<=1kb)	chr11	115475677	115490466	14790	+	276905	uc007mht.1	-157	ENSMUSG00000057219	Armc7	armadillo repeat containing 7
1740	chr11	115491768	115491797	30	*	5.62046e-05	2.34025e-05	0.000431345	-0.000407942	Promoter (<=1kb)	chr11	115490426	115491814	1389	-	50773	uc007mhu.1	17	ENSMUSG00000020736	Nt5c	5',3'-nucleotidase, cytosolic
1741	chr11	115514374	115514400	27	*	2.48664e-12	0.000470587	0.320076	-0.319606	Promoter (<=1kb)	chr11	115497353	115514370	17018	-	15374	uc007mhv.1	-4	ENSMUSG00000020737	Hn1	hematological and neurological expressed sequence 1
1742	chr11	115535716	115535786	71	*	1.02795e-07	0.00363117	0.340577	-0.337156	Promoter (<=1kb)	chr11	115523109	115536230	13122	-	170930	uc007mhw.1	444	ENSMUSG00000020738	Sumo2	small ubiquitin-like modifier 2
1743	chr11	115535954	115535965	12	*	4.29636e-10	0.339652	0.00126561	0.338386	Promoter (<=1kb)	chr11	115523109	115536230	13122	-	170930	uc007mhw.1	265	ENSMUSG00000020738	Sumo2	small ubiquitin-like modifier 2
1744	chr11	115604360	115604368	9	*	9.14055e-08	0.00374176	0.338406	-0.334597	Promoter (<=1kb)	chr11	115604151	115607624	3474	+	50529	uc007mia.1	217	ENSMUSG00000046756	Mrps7	mitchondrial ribosomal protein S7
1745	chr11	115627972	115627972	1	*	0.00135491	0.192035	0.00803456	0.184	Promoter (<=1kb)	chr11	115614181	115628295	14115	-	67283	uc007mig.2	323	ENSMUSG00000020744	Slc25a19	solute carrier family 25 (mitochondrial thiamine pyrophosphate carrier), member 19
1746	chr11	115628080	115628080	1	*	0.000293836	0.287782	0.0115261	0.276255	Promoter (<=1kb)	chr11	115614181	115628295	14115	-	67283	uc007mig.2	215	ENSMUSG00000020744	Slc25a19	solute carrier family 25 (mitochondrial thiamine pyrophosphate carrier), member 19
1747	chr11	115628081	115628081	1	*	3.74773e-06	8.34302e-05	0.0113837	-0.0113003	Promoter (<=1kb)	chr11	115614181	115628295	14115	-	67283	uc007mig.2	214	ENSMUSG00000020744	Slc25a19	solute carrier family 25 (mitochondrial thiamine pyrophosphate carrier), member 19
1748	chr11	115628085	115628085	1	*	0.000127599	0.304173	0.0106512	0.293522	Promoter (<=1kb)	chr11	115614181	115628295	14115	-	67283	uc007mig.2	210	ENSMUSG00000020744	Slc25a19	solute carrier family 25 (mitochondrial thiamine pyrophosphate carrier), member 19
1749	chr11	116024237	116024267	31	*	0.00112405	0.0152197	0.264694	-0.256318	Promoter (<=1kb)	chr11	116021961	116024504	2544	-	15081	uc007mjo.1	237	ENSMUSG00000016559	H3f3b	H3 histone, family 3B
1750	chr11	116024322	116024359	38	*	1.93874e-12	0.351161	0.000655272	0.350482	Promoter (<=1kb)	chr11	116021961	116024504	2544	-	15081	uc007mjo.1	145	ENSMUSG00000016559	H3f3b	H3 histone, family 3B
1751	chr11	116024634	116024674	41	*	5.33741e-06	0.00383744	5.60721e-05	0.00378137	Promoter (<=1kb)	chr11	116021961	116024504	2544	-	15081	uc007mjo.1	-130	ENSMUSG00000016559	H3f3b	H3 histone, family 3B
1752	chr11	116109787	116109832	46	*	7.31678e-08	0.00483533	2.65703e-05	0.00480999	Promoter (<=1kb)	chr11	116105750	116110235	4486	-	217333	uc007mjx.2	403	ENSMUSG00000020773	Trim47	tripartite motif-containing 47
1753	chr11	116168221	116168254	34	*	6.19893e-12	0.342943	0.000599379	0.342293	Promoter (<=1kb)	chr11	116142285	116168178	25894	-	217335	uc007mkh.1	-43	ENSMUSG00000020776	Fbf1	Fas (TNFRSF6) binding factor 1
1754	chr11	116198580	116198674	95	*	5.60428e-07	0.000131874	0.00931832	-0.00918645	Promoter (<=1kb)	chr11	116198855	116215318	16464	+	69535	uc007mkn.2	-275	ENSMUSG00000020778	Ten1	TEN1 telomerase capping complex subunit
1755	chr11	116199035	116199102	68	*	1.06359e-08	0.0031615	2.41013e-05	0.00313557	Promoter (<=1kb)	chr11	116171883	116199045	27163	-	11430	uc007mkl.2	0	ENSMUSG00000020777	Acox1	acyl-Coenzyme A oxidase 1, palmitoyl
1756	chr11	116273616	116273671	56	*	0.000355612	0.00925207	0.233661	-0.224409	Promoter (<=1kb)	chr11	116245166	116274217	29052	-	217337	uc007mkq.1	546	ENSMUSG00000020780	Srp68	signal recognition particle 68
1757	chr11	116274047	116274084	38	*	3.10453e-05	0.0197493	0.000337526	0.0194134	Promoter (<=1kb)	chr11	116245166	116274217	29052	-	217337	uc007mkq.1	133	ENSMUSG00000020780	Srp68	signal recognition particle 68
1758	chr11	116306645	116306686	42	*	6.16456e-05	0.00925977	0.284448	-0.275188	Promoter (<=1kb)	chr11	116287998	116306738	18741	-	53413	uc007mkt.2	52	ENSMUSG00000020792	Exoc7	exocyst complex component 7
1759	chr11	116335610	116335671	62	*	0.000125524	0.0660048	0.00136058	0.0646877	Promoter (<=1kb)	chr11	116330704	116335354	4651	-	15223	uc007mkv.2	-256	ENSMUSG00000034227	Foxj1	forkhead box J1
1760	chr11	116412366	116412366	1	*	6.40615e-12	3.12436e-05	0.00719978	-0.00716854	Promoter (<=1kb)	chr11	116336345	116413032	76688	-	217340	uc007mky.2	666	ENSMUSG00000052949	Rnf157	ring finger protein 157
1761	chr11	116412607	116412607	1	*	4.27392e-12	0.345355	0.000741232	0.344614	Promoter (<=1kb)	chr11	116336345	116413032	76688	-	217340	uc007mky.2	425	ENSMUSG00000052949	Rnf157	ring finger protein 157
1762	chr11	116412613	116412617	5	*	2.53006e-05	2.37723e-05	0.000545796	-0.000522024	Promoter (<=1kb)	chr11	116336345	116413032	76688	-	217340	uc007mky.2	415	ENSMUSG00000052949	Rnf157	ring finger protein 157
1763	chr11	116413026	116413106	81	*	1.0457e-09	0.34414	0.00237561	0.341279	Promoter (<=1kb)	chr11	116336345	116413032	76688	-	217340	uc007mky.2	0	ENSMUSG00000052949	Rnf157	ring finger protein 157
1764	chr11	116413206	116413292	87	*	1.06029e-09	2.92811e-05	0.00357775	-0.00354832	Promoter (<=1kb)	chr11	116336345	116413032	76688	-	217340	uc007mky.2	-174	ENSMUSG00000052949	Rnf157	ring finger protein 157
1765	chr11	116446465	116446497	33	*	8.47489e-07	0.00059819	0.103084	-0.102486	Exon (uc007mlc.1/217341, exon 7 of 14)	chr11	116441325	116454347	13023	-	217341	uc007mlc.1	7850	ENSMUSG00000070331	Qrich2	glutamine rich 2
1766	chr11	116489935	116489951	17	*	4.4708e-05	0.00298917	3.53457e-05	0.00295382	Promoter (<=1kb)	chr11	116470816	116490346	19531	-	67763	uc007mld.2	395	ENSMUSG00000015869	Prpsap1	phosphoribosyl pyrophosphate synthetase-associated protein 1
1767	chr11	116490320	116490339	20	*	0.000948396	0.0118732	0.00067168	0.0112015	Promoter (<=1kb)	chr11	116470816	116490346	19531	-	67763	uc007mld.2	7	ENSMUSG00000015869	Prpsap1	phosphoribosyl pyrophosphate synthetase-associated protein 1
1768	chr11	116532870	116532954	85	*	2.04269e-12	0.000100412	0.0110109	-0.0109104	Promoter (<=1kb)	chr11	116533238	116536675	3438	+	20698	uc007mlj.2	-368	ENSMUSG00000061878	Sphk1	sphingosine kinase 1
1769	chr11	116580853	116580903	51	*	5.60858e-12	0.000670779	0.338856	-0.338139	Promoter (<=1kb)	chr11	116537753	116581447	43695	-	217342	uc007mln.1	544	ENSMUSG00000020802	Ube2o	ubiquitin-conjugating enzyme E2O
1770	chr11	116843144	116843223	80	*	6.4109e-13	0.00709448	3.48231e-05	0.00665262	Promoter (<=1kb)	chr11	116837432	116843449	6018	-	107817	uc007mmi.1	226	ENSMUSG00000056962	Jmjd6	jumonji domain containing 6
1771	chr11	117123834	117123837	4	*	0.00103811	0.391783	0.488789	-0.0970059	Intron (uc007mmz.2/74136, intron 2 of 2)	chr11	117115172	117128763	13592	+	74136	uc007mmz.2	8665	ENSMUSG00000020823	Sec14l1	SEC14-like 1 (S. cerevisiae)
1772	chr11	117267026	117267069	44	*	1.60906e-06	0.00342526	0.277282	-0.273857	Promoter (<=1kb)	chr11	117266246	117362325	96080	+	53860	uc007mne.2	823	ENSMUSG00000059248	Sept9	septin 9
1773	chr11	117267198	117267198	1	*	0.00188377	0.18022	0.00833833	0.171882	Promoter (<=1kb)	chr11	117266246	117362325	96080	+	53860	uc007mne.2	952	ENSMUSG00000059248	Sept9	septin 9
1774	chr11	117317969	117317989	21	*	5.50809e-10	0.00135235	0.341178	-0.339825	Intron (uc007mnd.2/53860, intron 3 of 11)	chr11	117331715	117362325	30611	+	53860	uc007mnf.2	-13746	ENSMUSG00000059248	Sept9	septin 9
1775	chr11	117649671	117649672	2	*	0.000463822	0.825199	0.645151	0.180049	Distal Intergenic	chr11	117654289	117763441	109153	+	217351	uc007mni.2	-4618	ENSMUSG00000025571	Tnrc6c	trinucleotide repeat containing 6C
1776	chr11	117655489	117655521	33	*	0.000141523	0.0572116	0.00100366	0.056208	Promoter (<=1kb)	chr11	117654965	117763441	108477	+	217351	uc007mnj.2	556	ENSMUSG00000025571	Tnrc6c	trinucleotide repeat containing 6C
1777	chr11	117849203	117849313	111	*	1.17926e-10	0.0122188	9.79981e-05	0.0114253	Promoter (<=1kb)	chr11	117849237	117855743	6507	+	11799	uc007mod.1	0	ENSMUSG00000017716	Birc5	baculoviral IAP repeat-containing 5
1778	chr11	117873229	117873269	41	*	2.56539e-09	0.000201406	0.00641208	-0.00616958	Promoter (<=1kb)	chr11	117867949	117873526	5578	-	71776	uc007moh.2	257	ENSMUSG00000017713	Tha1	threonine aldolase 1
1779	chr11	118248479	118248490	12	*	6.59615e-07	0.296196	0.00329011	0.292906	Promoter (<=1kb)	chr11	118164166	118248592	84427	-	19157	uc011yil.1	102	ENSMUSG00000017132	Cyth1	cytohesin 1
1780	chr11	118248504	118248504	1	*	1.35224e-05	4.36435e-05	0.00229215	-0.00224851	Promoter (<=1kb)	chr11	118164166	118248592	84427	-	19157	uc011yil.1	88	ENSMUSG00000017132	Cyth1	cytohesin 1
1781	chr11	118248511	118248644	134	*	3.20402e-08	0.308191	0.00206931	0.30614	Promoter (<=1kb)	chr11	118164166	118248592	84427	-	19157	uc011yil.1	0	ENSMUSG00000017132	Cyth1	cytohesin 1
1782	chr11	118249101	118249110	10	*	7.17154e-06	0.00391436	0.264942	-0.261027	Promoter (<=1kb)	chr11	118164166	118248592	84427	-	19157	uc011yil.1	-509	ENSMUSG00000017132	Cyth1	cytohesin 1
1783	chr11	118289968	118289968	1	*	1.53804e-12	0.345406	0.000515471	0.34489	Promoter (<=1kb)	chr11	118259653	118290244	30592	-	72344	uc011yim.1	276	ENSMUSG00000033909	Usp36	ubiquitin specific peptidase 36
1784	chr11	118289987	118289989	3	*	0.000160759	2.31576e-05	0.000389929	-0.000366772	Promoter (<=1kb)	chr11	118259653	118290244	30592	-	72344	uc011yim.1	255	ENSMUSG00000033909	Usp36	ubiquitin specific peptidase 36
1785	chr11	119023505	119023538	34	*	5.39787e-07	0.00485843	0.337107	-0.332248	Promoter (<=1kb)	chr11	119023029	119031270	8242	+	12416	uc007mpt.1	509	ENSMUSG00000025577	Cbx2	chromobox 2
1786	chr11	119037249	119037340	92	*	8.06707e-06	0.00729425	0.315624	-0.30833	Distal Intergenic	chr11	119038436	119040913	2478	-	30951	uc007mpu.1	3573	ENSMUSG00000025578	Cbx8	chromobox 8
1787	chr11	119039245	119039272	28	*	5.88148e-05	0.829638	0.905641	-0.0778107	Promoter (1-2kb)	chr11	119038436	119040913	2478	-	30951	uc007mpu.1	1641	ENSMUSG00000025578	Cbx8	chromobox 8
1788	chr11	119053457	119053611	155	*	4.24027e-11	0.0050596	4.49657e-05	0.00502301	Distal Intergenic	chr11	119038436	119040913	2478	-	30951	uc007mpu.1	-12544	ENSMUSG00000025578	Cbx8	chromobox 8
1789	chr11	119299806	119299834	29	*	6.25489e-06	0.227921	0.00288853	0.225033	Promoter (<=1kb)	chr11	119288363	119300043	11681	-	192170	uc007mqj.1	209	ENSMUSG00000025580	Eif4a3	eukaryotic translation initiation factor 4A3
1790	chr11	119300084	119300107	24	*	1.00369e-09	0.00163899	0.34357	-0.341931	Promoter (<=1kb)	chr11	119288363	119300043	11681	-	192170	uc007mqj.1	-41	ENSMUSG00000025580	Eif4a3	eukaryotic translation initiation factor 4A3
1791	chr11	119300382	119300419	38	*	6.37121e-08	3.00453e-05	0.00298526	-0.00295521	Promoter (<=1kb)	chr11	119288363	119300043	11681	-	192170	uc007mqj.1	-339	ENSMUSG00000025580	Eif4a3	eukaryotic translation initiation factor 4A3
1792	chr11	120086674	120086843	170	*	4.87543e-10	0.00167588	0.341614	-0.339696	Promoter (<=1kb)	chr11	120064430	120086827	22398	-	12009	uc007mrp.2	0	ENSMUSG00000039781	Cep131	centrosomal protein 131
1793	chr11	120087028	120087028	1	*	7.98741e-06	0.00775169	0.309733	-0.301981	Promoter (<=1kb)	chr11	120064430	120086827	22398	-	12009	uc007mrp.2	-201	ENSMUSG00000039781	Cep131	centrosomal protein 131
1794	chr11	120151222	120151326	105	*	0.000303833	0.233567	0.00997616	0.223528	Promoter (<=1kb)	chr11	120103951	120151351	47401	-	72055	uc007mrv.2	25	ENSMUSG00000061306	Slc38a10	solute carrier family 38, member 10
1795	chr11	120171575	120171623	49	*	0.000687146	0.527919	0.742126	-0.213373	Distal Intergenic	chr11	120186650	120189856	3207	-	100042332	uc007msb.2	18233	#N/A	2810410L24Rik	RIKEN cDNA 2810410L24 gene
1796	chr11	120188189	120188221	33	*	0.00118629	0.00877138	0.19689	-0.188521	Promoter (1-2kb)	chr11	120186650	120189856	3207	-	100042332	uc007msb.2	1635	#N/A	2810410L24Rik	RIKEN cDNA 2810410L24 gene
1797	chr11	120188336	120188360	25	*	2.54629e-05	0.000211095	0.0166105	-0.0163994	Promoter (1-2kb)	chr11	120186650	120189856	3207	-	100042332	uc007msb.2	1496	#N/A	2810410L24Rik	RIKEN cDNA 2810410L24 gene
1798	chr11	120188724	120188754	31	*	6.23622e-05	0.00485998	0.22032	-0.215453	Promoter (1-2kb)	chr11	120186650	120189856	3207	-	100042332	uc007msb.2	1102	#N/A	2810410L24Rik	RIKEN cDNA 2810410L24 gene
1799	chr11	120189771	120189865	95	*	5.99397e-13	2.58248e-05	0.00611657	-0.00609185	Promoter (<=1kb)	chr11	120186650	120189856	3207	-	100042332	uc007msb.2	0	#N/A	2810410L24Rik	RIKEN cDNA 2810410L24 gene
1800	chr11	120225696	120225712	17	*	1.70405e-05	0.635061	0.880041	-0.246768	Distal Intergenic	chr11	120232947	120292297	59351	+	268515	uc007msd.2	-7251	ENSMUSG00000039741	Bahcc1	BAH domain and coiled-coil containing 1
1801	chr11	120230405	120230528	124	*	1.74782e-12	0.00753925	3.50539e-05	0.00747382	Promoter (2-3kb)	chr11	120232947	120292297	59351	+	268515	uc007msd.2	-2542	ENSMUSG00000039741	Bahcc1	BAH domain and coiled-coil containing 1
1802	chr11	120230983	120231027	45	*	2.77093e-10	0.00140867	0.336442	-0.335033	Promoter (1-2kb)	chr11	120232947	120292297	59351	+	268515	uc007msd.2	-1964	ENSMUSG00000039741	Bahcc1	BAH domain and coiled-coil containing 1
1803	chr11	120231029	120231029	1	*	0.000526118	0.000211188	2.37924e-05	0.000187395	Promoter (1-2kb)	chr11	120232947	120292297	59351	+	268515	uc007msd.2	-1918	ENSMUSG00000039741	Bahcc1	BAH domain and coiled-coil containing 1
1804	chr11	120231030	120231200	171	*	1.31569e-05	2.45933e-05	0.000726745	-0.000702151	Promoter (1-2kb)	chr11	120232947	120292297	59351	+	268515	uc007msd.2	-1917	ENSMUSG00000039741	Bahcc1	BAH domain and coiled-coil containing 1
1805	chr11	120231205	120231243	39	*	7.22161e-06	0.00306461	3.40378e-05	0.00303057	Promoter (1-2kb)	chr11	120232947	120292297	59351	+	268515	uc007msd.2	-1742	ENSMUSG00000039741	Bahcc1	BAH domain and coiled-coil containing 1
1806	chr11	120231244	120231255	12	*	1.77692e-06	0.00566292	0.327864	-0.322201	Promoter (1-2kb)	chr11	120232947	120292297	59351	+	268515	uc007msd.2	-1703	ENSMUSG00000039741	Bahcc1	BAH domain and coiled-coil containing 1
1807	chr11	120231256	120231256	1	*	0.00102513	0.0145714	0.000452584	0.0141188	Promoter (1-2kb)	chr11	120232947	120292297	59351	+	268515	uc007msd.2	-1691	ENSMUSG00000039741	Bahcc1	BAH domain and coiled-coil containing 1
1808	chr11	120231257	120231268	12	*	1.81743e-06	0.00626775	0.336964	-0.330696	Promoter (1-2kb)	chr11	120232947	120292297	59351	+	268515	uc007msd.2	-1690	ENSMUSG00000039741	Bahcc1	BAH domain and coiled-coil containing 1
1809	chr11	120231353	120231353	1	*	4.56879e-09	0.302009	0.00179599	0.300213	Promoter (1-2kb)	chr11	120232947	120292297	59351	+	268515	uc007msd.2	-1594	ENSMUSG00000039741	Bahcc1	BAH domain and coiled-coil containing 1
1810	chr11	120235652	120235723	72	*	2.46366e-07	0.33938	0.00434851	0.335032	Promoter (1-2kb)	chr11	120236699	120292297	55599	+	268515	uc007mse.2	-1047	ENSMUSG00000039741	Bahcc1	BAH domain and coiled-coil containing 1
1811	chr11	120235980	120236082	103	*	0.000295972	0.00797136	0.225825	-0.217477	Promoter (<=1kb)	chr11	120236699	120292297	55599	+	268515	uc007mse.2	-719	ENSMUSG00000039741	Bahcc1	BAH domain and coiled-coil containing 1
1812	chr11	120236739	120236885	147	*	9.79293e-08	0.330031	0.00290847	0.328236	Promoter (<=1kb)	chr11	120236699	120292297	55599	+	268515	uc007mse.2	186	ENSMUSG00000039741	Bahcc1	BAH domain and coiled-coil containing 1
1813	chr11	120237269	120237351	83	*	4.917e-08	0.0144151	0.000119951	0.0141666	Promoter (<=1kb)	chr11	120236699	120292297	55599	+	268515	uc007mse.2	652	ENSMUSG00000039741	Bahcc1	BAH domain and coiled-coil containing 1
1814	chr11	120348049	120348177	129	*	3.53268e-08	2.66245e-05	0.00379589	-0.00376964	Promoter (<=1kb)	chr11	120345690	120348484	2795	-	11465	uc007msi.1	307	ENSMUSG00000062825	Actg1	actin, gamma, cytoplasmic 1
1815	chr11	120348370	120348370	1	*	0.000237684	0.00618901	0.243357	-0.237168	Promoter (<=1kb)	chr11	120345690	120348484	2795	-	11465	uc007msi.1	114	ENSMUSG00000062825	Actg1	actin, gamma, cytoplasmic 1
1816	chr11	120348557	120348603	47	*	0.000691263	0.240848	0.00620598	0.229332	Promoter (<=1kb)	chr11	120345690	120348484	2795	-	11465	uc007msi.1	-73	ENSMUSG00000062825	Actg1	actin, gamma, cytoplasmic 1
1817	chr11	120348683	120348760	78	*	2.25575e-12	4.42753e-05	0.0141712	-0.0141269	Promoter (<=1kb)	chr11	120348678	120351190	2513	+	66838	uc007msj.2	82	ENSMUSG00000043644	0610009L18Rik	RIKEN cDNA 0610009L18 gene
1818	chr11	120491955	120492001	47	*	4.34136e-09	0.00183616	0.342214	-0.340378	Promoter (<=1kb)	chr11	120491837	120501161	9325	+	27376	uc007mtb.2	164	ENSMUSG00000025792	Slc25a10	solute carrier family 25 (mitochondrial carrier, dicarboxylate transporter), member 10
1819	chr11	120492148	120492175	28	*	1.12709e-10	0.000805855	0.31568	-0.314874	Promoter (<=1kb)	chr11	120491837	120501161	9325	+	27376	uc007mtb.2	338	ENSMUSG00000025792	Slc25a10	solute carrier family 25 (mitochondrial carrier, dicarboxylate transporter), member 10
1820	chr11	120597923	120598030	108	*	7.07935e-09	0.00464307	3.40329e-05	0.0045526	Promoter (<=1kb)	chr11	120594516	120598365	3850	-	21681	uc007mtl.1	335	ENSMUSG00000025134	Alyref	Aly/REF export factor
1821	chr11	120598039	120598047	9	*	0.000504555	0.0082606	0.258009	-0.249748	Promoter (<=1kb)	chr11	120594516	120598365	3850	-	21681	uc007mtl.1	318	ENSMUSG00000025134	Alyref	Aly/REF export factor
1822	chr11	120633708	120633715	8	*	0.000663926	0.00188944	0.0561853	-0.0543246	Promoter (<=1kb)	chr11	120628351	120633547	5197	-	17134	uc007mtu.2	-161	ENSMUSG00000051510	Mafg	v-maf musculoaponeurotic fibrosarcoma oncogene family, protein G (avian)
1823	chr11	120643302	120643314	13	*	0.000821778	0.307735	0.0286912	0.279044	Promoter (<=1kb)	chr11	120635712	120643670	7959	-	209027	uc007mtv.1	356	ENSMUSG00000025140	Pycr1	pyrroline-5-carboxylate reductase 1
1824	chr11	120643463	120643463	1	*	0.00179684	0.0590271	0.0033492	0.0556779	Promoter (<=1kb)	chr11	120635712	120643670	7959	-	209027	uc007mtv.1	207	ENSMUSG00000025140	Pycr1	pyrroline-5-carboxylate reductase 1
1825	chr11	120673089	120673285	197	*	3.05846e-06	3.95523e-05	0.00489386	-0.00485635	Promoter (<=1kb)	chr11	120672973	120709446	36474	+	68938	uc007mua.2	312	ENSMUSG00000025142	Aspscr1	alveolar soft part sarcoma chromosome region, candidate 1 (human)
1826	chr11	120721587	120721624	38	*	8.0978e-13	0.343893	0.000502713	0.34339	Promoter (<=1kb)	chr11	120721468	120723969	2502	+	170758	uc007mug.1	156	ENSMUSG00000018012	Rac3	RAS-related C3 botulinum substrate 3
1827	chr11	120796030	120796079	50	*	1.29589e-08	0.0136236	6.41398e-05	0.0135594	Promoter (<=1kb)	chr11	120789202	120796389	7188	-	68730	uc007mur.1	310	ENSMUSG00000025155	Dus1l	dihydrouridine synthase 1-like (S. cerevisiae)
1828	chr11	121204501	121204649	149	*	1.95442e-05	0.00525918	0.000111312	0.00475675	Promoter (<=1kb)	chr11	121177593	121204648	27056	-	66179	uc007mvk.1	0	ENSMUSG00000025169	Ogfod3	2-oxoglutarate and iron-dependent oxygenase domain containing 3
1829	chr11	121236725	121236742	18	*	0.000141633	0.226369	0.00595468	0.220414	Promoter (<=1kb)	chr11	121237236	121255856	18621	+	67608	uc007mvq.2	-511	ENSMUSG00000000056	Narf	nuclear prelamin A recognition factor
1830	chr11	121236758	121236761	4	*	7.91503e-05	5.53422e-05	0.00200623	-0.00195089	Promoter (<=1kb)	chr11	121237236	121255856	18621	+	67608	uc007mvq.2	-478	ENSMUSG00000000056	Narf	nuclear prelamin A recognition factor
1831	chr11	121236762	121236783	22	*	5.24692e-10	0.332235	0.00124229	0.330992	Promoter (<=1kb)	chr11	121237236	121255856	18621	+	67608	uc007mvq.2	-474	ENSMUSG00000000056	Narf	nuclear prelamin A recognition factor
1832	chr11	121236797	121236797	1	*	7.40228e-05	2.46313e-05	0.000456338	-0.000431707	Promoter (<=1kb)	chr11	121237236	121255856	18621	+	67608	uc007mvq.2	-439	ENSMUSG00000000056	Narf	nuclear prelamin A recognition factor
1833	chr11	121259710	121259753	44	*	7.28126e-06	0.00698203	0.287963	-0.280981	Promoter (<=1kb)	chr11	121259683	121309896	50214	+	68837	uc007mvs.1	70	ENSMUSG00000039275	Foxk2	forkhead box K2
1834	chr11	121259919	121259984	66	*	3.6889e-05	2.31124e-05	0.000449848	-0.000426735	Promoter (<=1kb)	chr11	121259683	121309896	50214	+	68837	uc007mvs.1	301	ENSMUSG00000039275	Foxk2	forkhead box K2
1835	chr11	121260123	121260129	7	*	0.00199734	0.0145043	0.000956491	0.0135478	Promoter (<=1kb)	chr11	121259683	121309896	50214	+	68837	uc007mvs.1	446	ENSMUSG00000039275	Foxk2	forkhead box K2
1836	chr11	121260564	121260614	51	*	1.93684e-06	0.309081	0.00635728	0.302724	Promoter (<=1kb)	chr11	121259683	121309896	50214	+	68837	uc007mvs.1	931	ENSMUSG00000039275	Foxk2	forkhead box K2
1837	chr11	121354003	121354110	108	*	1.57966e-06	0.178879	0.000605029	0.178188	Promoter (<=1kb)	chr11	121327203	121354447	27245	-	66840	uc007mvt.2	337	ENSMUSG00000025173	Wdr45b	WD repeat domain 45B
1838	chr11	121388107	121388234	128	*	2.67944e-11	0.000901874	0.334645	-0.33356	Promoter (<=1kb)	chr11	121356121	121388251	32131	-	217371	uc007mvu.2	17	ENSMUSG00000025170	Rab40b	Rab40B, member RAS oncogene family
1839	chr11	121421614	121421676	63	*	3.13562e-08	0.00233213	0.318563	-0.316329	Promoter (<=1kb)	chr11	121421373	121430768	9396	+	238024	uc007mvv.2	303	ENSMUSG00000039253	Fn3krp	fructosamine 3 kinase related protein
1840	chr11	121421702	121421702	1	*	7.10081e-08	0.00383597	3.05817e-05	0.00380538	Promoter (<=1kb)	chr11	121421373	121430768	9396	+	238024	uc007mvv.2	329	ENSMUSG00000039253	Fn3krp	fructosamine 3 kinase related protein
1841	chr11	121421714	121421714	1	*	2.29945e-07	0.00390464	0.330445	-0.32654	Promoter (<=1kb)	chr11	121421373	121430768	9396	+	238024	uc007mvv.2	341	ENSMUSG00000039253	Fn3krp	fructosamine 3 kinase related protein
1842	chr11	121421715	121421715	1	*	2.03612e-07	0.00392105	3.65714e-05	0.00388448	Promoter (<=1kb)	chr11	121421373	121430768	9396	+	238024	uc007mvv.2	342	ENSMUSG00000039253	Fn3krp	fructosamine 3 kinase related protein
1843	chr11	121421735	121421736	2	*	1.01671e-06	0.00441458	0.311812	-0.307398	Promoter (<=1kb)	chr11	121421373	121430768	9396	+	238024	uc007mvv.2	363	ENSMUSG00000039253	Fn3krp	fructosamine 3 kinase related protein
1844	chr11	121421749	121421749	1	*	2.00583e-05	0.00508377	8.72055e-05	0.00499657	Promoter (<=1kb)	chr11	121421373	121430768	9396	+	238024	uc007mvv.2	376	ENSMUSG00000039253	Fn3krp	fructosamine 3 kinase related protein
1845	chr11	121421750	121421750	1	*	6.44454e-06	0.00513433	0.286703	-0.281568	Promoter (<=1kb)	chr11	121421373	121430768	9396	+	238024	uc007mvv.2	377	ENSMUSG00000039253	Fn3krp	fructosamine 3 kinase related protein
1846	chr11	121421764	121421764	1	*	0.00291189	0.0076762	0.000342242	0.00733396	Promoter (<=1kb)	chr11	121421373	121430768	9396	+	238024	uc007mvv.2	391	ENSMUSG00000039253	Fn3krp	fructosamine 3 kinase related protein
1847	chr11	121672866	121673020	155	*	1.11726e-08	0.00887623	8.97948e-05	0.00878643	Promoter (<=1kb)	chr11	121616208	121673151	56944	-	210004	uc007mwb.2	131	ENSMUSG00000046605	B3gntl1	UDP-GlcNAc:betaGal beta-1,3-N-acetylglucosaminyltransferase-like 1
1848	chr12	3309442	3309442	1	*	0.00103969	0.343796	0.026297	0.317499	Promoter (<=1kb)	chr12	3247428	3309969	62542	-	19325	uc007mwl.2	527	ENSMUSG00000020671	Rab10	RAB10, member RAS oncogene family
1849	chr12	3309445	3309526	82	*	1.11692e-06	2.61811e-05	0.0140075	-0.0139813	Promoter (<=1kb)	chr12	3247428	3309969	62542	-	19325	uc007mwl.2	443	ENSMUSG00000020671	Rab10	RAB10, member RAS oncogene family
1850	chr12	3309661	3309859	199	*	1.85959e-07	0.00129171	2.4831e-05	0.00126688	Promoter (<=1kb)	chr12	3247428	3309969	62542	-	19325	uc007mwl.2	110	ENSMUSG00000020671	Rab10	RAB10, member RAS oncogene family
1851	chr12	3426638	3426699	62	*	8.51215e-10	0.00134776	0.332657	-0.331309	Promoter (<=1kb)	chr12	3403883	3426747	22865	-	100043040	uc007mwo.2	48	ENSMUSG00000071456	1110002L01Rik	RIKEN cDNA 1110002L01 gene
1852	chr12	3572305	3572432	128	*	6.47058e-06	0.000984366	2.42366e-05	0.000960129	Promoter (<=1kb)	chr12	3572391	3646786	74396	+	13528	uc007mwu.2	0	ENSMUSG00000071454	Dtnb	dystrobrevin, beta
1853	chr12	3572524	3572577	54	*	6.17831e-06	0.00877695	0.316709	-0.307932	Promoter (<=1kb)	chr12	3572391	3646786	74396	+	13528	uc007mwu.2	186	ENSMUSG00000071454	Dtnb	dystrobrevin, beta
1854	chr12	3572698	3572722	25	*	0.000194874	0.31196	0.0139681	0.297992	Promoter (<=1kb)	chr12	3572391	3646786	74396	+	13528	uc007mwu.2	331	ENSMUSG00000071454	Dtnb	dystrobrevin, beta
1855	chr12	3806426	3806448	23	*	3.35702e-06	0.00196389	2.89076e-05	0.00193499	Promoter (<=1kb)	chr12	3806523	3867484	60962	+	13435	uc007mxa.2	-97	ENSMUSG00000020661	Dnmt3a	DNA methyltransferase 3A
1856	chr12	3806613	3806638	26	*	1.6119e-08	0.00213186	0.326867	-0.324693	Promoter (<=1kb)	chr12	3806523	3867484	60962	+	13435	uc007mxa.2	115	ENSMUSG00000020661	Dnmt3a	DNA methyltransferase 3A
1857	chr12	3806873	3807023	151	*	2.81032e-13	0.344362	0.000457945	0.343904	Promoter (<=1kb)	chr12	3806980	3914443	107464	+	13435	uc007mxb.1	0	ENSMUSG00000020661	Dnmt3a	DNA methyltransferase 3A
1858	chr12	3807270	3807318	49	*	8.76034e-10	0.00154419	0.337156	-0.335612	Promoter (<=1kb)	chr12	3807160	3914443	107284	+	13435	uc007mxc.1	158	ENSMUSG00000020661	Dnmt3a	DNA methyltransferase 3A
1859	chr12	3808104	3808130	27	*	1.02876e-05	0.00685931	0.357902	-0.351043	Promoter (<=1kb)	chr12	3807160	3914443	107284	+	13435	uc007mxc.1	970	ENSMUSG00000020661	Dnmt3a	DNA methyltransferase 3A
1860	chr12	4476339	4476369	31	*	2.71356e-07	0.328694	0.00453599	0.324456	Promoter (<=1kb)	chr12	4247362	4477182	229821	-	17977	uc007mxs.2	813	ENSMUSG00000020647	Ncoa1	nuclear receptor coactivator 1
1861	chr12	4476456	4476456	1	*	0.000492314	0.000321894	0.00976475	-0.00944286	Promoter (<=1kb)	chr12	4247362	4477182	229821	-	17977	uc007mxs.2	726	ENSMUSG00000020647	Ncoa1	nuclear receptor coactivator 1
1862	chr12	4476615	4476809	195	*	7.08019e-08	2.45673e-05	0.00181101	-0.00178693	Promoter (<=1kb)	chr12	4247362	4477182	229821	-	17977	uc007mxs.2	373	ENSMUSG00000020647	Ncoa1	nuclear receptor coactivator 1
1863	chr12	4593261	4593297	37	*	1.34975e-06	0.001081	0.155098	-0.154017	Promoter (<=1kb)	chr12	4593008	4641139	48132	+	20403	uc007mxv.2	289	ENSMUSG00000020640	Itsn2	intersectin 2
1864	chr12	4593475	4593484	10	*	1.87978e-09	2.3234e-05	0.00166854	-0.00164531	Promoter (<=1kb)	chr12	4593008	4641139	48132	+	20403	uc007mxv.2	476	ENSMUSG00000020640	Itsn2	intersectin 2
1865	chr12	4593496	4593497	2	*	1.50534e-09	0.344646	0.00217564	0.34247	Promoter (<=1kb)	chr12	4593008	4641139	48132	+	20403	uc007mxv.2	489	ENSMUSG00000020640	Itsn2	intersectin 2
1866	chr12	4593498	4593499	2	*	1.12702e-09	2.50665e-05	0.00221373	-0.00218866	Promoter (<=1kb)	chr12	4593008	4641139	48132	+	20403	uc007mxv.2	491	ENSMUSG00000020640	Itsn2	intersectin 2
1867	chr12	4593504	4593586	83	*	1.87766e-07	0.325055	0.00484273	0.320212	Promoter (<=1kb)	chr12	4593008	4641139	48132	+	20403	uc007mxv.2	578	ENSMUSG00000020640	Itsn2	intersectin 2
1868	chr12	4817376	4817399	24	*	2.34121e-08	3.73589e-05	0.0034029	-0.00336561	Promoter (<=1kb)	chr12	4817608	4827659	10052	+	66055	uc007myi.1	-232	ENSMUSG00000037361	Sf3b6	splicing factor 3B, subunit 6
1869	chr12	4907337	4907367	31	*	9.57576e-11	0.343181	0.00116906	0.342012	Promoter (<=1kb)	chr12	4879032	4907520	28489	-	217379	uc007myr.1	153	ENSMUSG00000020634	Ubxn2a	UBX domain protein 2A
1870	chr12	4907520	4907596	77	*	2.31748e-09	0.00288127	0.343211	-0.340408	Promoter (<=1kb)	chr12	4879032	4907520	28489	-	217379	uc007myr.1	0	ENSMUSG00000020634	Ubxn2a	UBX domain protein 2A
1871	chr12	4907598	4907620	23	*	1.28785e-08	0.00793569	0.000126596	0.00764475	Promoter (<=1kb)	chr12	4879032	4907520	28489	-	217379	uc007myr.1	-78	ENSMUSG00000020634	Ubxn2a	UBX domain protein 2A
1872	chr12	4907625	4907625	1	*	1.29812e-07	0.00629027	0.335304	-0.329014	Promoter (<=1kb)	chr12	4879032	4907520	28489	-	217379	uc007myr.1	-105	ENSMUSG00000020634	Ubxn2a	UBX domain protein 2A
1873	chr12	4907631	4907631	1	*	2.27075e-16	0.0067695	4.28101e-05	0.00672669	Promoter (<=1kb)	chr12	4879032	4907520	28489	-	217379	uc007myr.1	-111	ENSMUSG00000020634	Ubxn2a	UBX domain protein 2A
1874	chr12	4907633	4907633	1	*	1.24719e-07	0.00638667	0.335825	-0.329438	Promoter (<=1kb)	chr12	4879032	4907520	28489	-	217379	uc007myr.1	-113	ENSMUSG00000020634	Ubxn2a	UBX domain protein 2A
1875	chr12	4907635	4907640	6	*	5.49892e-07	0.00881159	0.00016972	0.00864187	Promoter (<=1kb)	chr12	4879032	4907520	28489	-	217379	uc007myr.1	-115	ENSMUSG00000020634	Ubxn2a	UBX domain protein 2A
1876	chr12	4907650	4907669	20	*	1.80137e-08	0.00474256	0.33812	-0.333824	Promoter (<=1kb)	chr12	4879032	4907520	28489	-	217379	uc007myr.1	-130	ENSMUSG00000020634	Ubxn2a	UBX domain protein 2A
1877	chr12	4917987	4918100	114	*	0.000623984	0.0499424	0.00244588	0.046765	Promoter (<=1kb)	chr12	4917353	4954994	37642	+	320817	uc007myt.1	747	ENSMUSG00000052812	Atad2b	ATPase family, AAA domain containing 2B
1878	chr12	8499010	8499036	27	*	1.10405e-05	7.42618e-05	0.00746214	-0.00738788	Promoter (<=1kb)	chr12	8497759	8499985	2227	-	11852	uc007mzp.1	949	ENSMUSG00000054364	Rhob	ras homolog gene family, member B
1879	chr12	8499594	8499687	94	*	1.01394e-06	0.331224	0.00569625	0.325528	Promoter (<=1kb)	chr12	8497759	8499985	2227	-	11852	uc007mzp.1	298	ENSMUSG00000054364	Rhob	ras homolog gene family, member B
1880	chr12	8500215	8500225	11	*	2.66257e-09	4.11347e-05	0.00725173	-0.00721059	Promoter (<=1kb)	chr12	8497759	8499985	2227	-	11852	uc007mzp.1	-230	ENSMUSG00000054364	Rhob	ras homolog gene family, member B
1881	chr12	8500230	8500230	1	*	6.44708e-06	0.319589	0.0080057	0.311584	Promoter (<=1kb)	chr12	8497759	8499985	2227	-	11852	uc007mzp.1	-245	ENSMUSG00000054364	Rhob	ras homolog gene family, member B
1882	chr12	8974019	8974065	47	*	2.73488e-08	0.00273701	0.33462	-0.331883	Promoter (<=1kb)	chr12	8974001	8991677	17677	+	74682	uc007nah.2	64	ENSMUSG00000066643	Wdr35	WD repeat domain 35
1883	chr12	9030388	9030421	34	*	9.1503e-07	3.33042e-05	0.00304871	-0.0030154	Promoter (<=1kb)	chr12	9029997	9036394	6398	+	75516	uc007nal.1	424	ENSMUSG00000066637	Ttc32	tetratricopeptide repeat domain 32
1884	chr12	9584591	9584607	17	*	0.000770624	0.0109796	0.128764	-0.117784	Distal Intergenic	chr12	9574442	9581500	7059	+	23967	uc007nao.2	10165	ENSMUSG00000048387	Osr1	odd-skipped related 1 (Drosophila)
1885	chr12	10390831	10390907	77	*	6.5798e-07	0.3433	0.00523033	0.338275	Promoter (<=1kb)	chr12	10390780	10395562	4783	+	105014	uc007nar.2	127	ENSMUSG00000020621	Rdh14	retinol dehydrogenase 14 (all-trans and 9-cis)
[truncated: 7,942 more rows]

## Sheet: Diet
	seqnames	start	end	width	strand	median.p	median.meth.group1	median.meth.group2	median.meth.diff	annotation	geneChr	geneStart	geneEnd	geneLength	geneStrand	geneId	transcriptId	distanceToTSS	ENSEMBL	SYMBOL	GENENAME
[truncated: 9,617 more rows]

[truncated: 1 more sheets: Interaction]
