# Supplementary material for: Ionizing Radiation Potentiates High-Fat Diet–Induced Insulin Resistance and Reprograms Skeletal Muscle and Adipose Progenitor Cells
Source: Oxford University Press journal article supplement (doi:10.2337/db16-0364), 2016-09-20
Supplement: db160364supplementarydata5.xlsx [file db160364supplementarydata5.xlsx]

## Sheet: Irradiation
ensembl_gene_id	logFC	logCPM	LR	PValue	FDR	chromosome_name	strand	transcript_start	transcript_end	refseq_mrna	mgi_symbol	description	Details
ENSMUSG00000033196	7.57048	5.49486	26.9697	2.06667e-07	8.52226e-05	chr11	+	67171027	67197517	NM_001039545	Myh2	myosin, heavy polypeptide 2, skeletal muscle, adult [Source:MGI Symbol;Acc:MGI:1339710]
ENSMUSG00000049630	5.34208	3.29876	26.7127	2.36068e-07	9.42062e-05	chr2	-	13011806	13003457	NM_153155	C1ql3	C1q-like 3 [Source:MGI Symbol;Acc:MGI:2387350]
ENSMUSG00000054423	4.88752	1.59416	29.6594	5.15029e-08	3.03401e-05	chr14	-	12823079	12372565	NM_001042617	Cadps	Ca2+-dependent secretion activator [Source:MGI Symbol;Acc:MGI:1350922]
ENSMUSG00000067276	4.67177	4.12465	33.3725	7.60905e-09	9.41315e-06	chrX	-	143827414	143802231	NM_007603	Capn6	calpain 6 [Source:MGI Symbol;Acc:MGI:1100850]
ENSMUSG00000031285	4.61708	3.61054	39.1595	3.9056e-10	9.66323e-07	chrX	-	143933311	143855842	NM_001110223	Dcx	doublecortin [Source:MGI Symbol;Acc:MGI:1277171]
ENSMUSG00000031111	4.39121	0.436442	21.7983	3.02873e-06	0.000572121	chrX	-	49797749	49782536	NM_177591	Igsf1	immunoglobulin superfamily, member 1 [Source:MGI Symbol;Acc:MGI:2147913]
ENSMUSG00000031965	4.17739	1.59095	36.2478	1.73756e-09	3.07076e-06	chr9	-	24774303	24720812	NM_194263	Tbx20	T-box 20 [Source:MGI Symbol;Acc:MGI:1888496]
ENSMUSG00000016327	4.12087	0.0578216	17.068	3.60655e-05	0.00284182	chrX	+	38316184	38336769	NM_133690	Atp1b4	ATPase, (Na+)/K+ transporting, beta 4 polypeptide [Source:MGI Symbol;Acc:MGI:1915071]
ENSMUSG00000042254	4.01696	1.54701	20.6354	5.5559e-06	0.000838195	chr9	+	65265180	65280605	NM_173385	Cilp	cartilage intermediate layer protein, nucleotide pyrophosphohydrolase [Source:MGI Symbol;Acc:MGI:2444507]
ENSMUSG00000001494	3.94557	1.48562	16.9029	3.93418e-05	0.00298278	chr11	-	101967015	101962458	NM_024449	Sost	sclerostin [Source:MGI Symbol;Acc:MGI:1921749]
ENSMUSG00000044006	3.84579	2.12076	15.9089	6.64655e-05	0.00446872	chr8	-	69887687	69880369	NM_026818	Cilp2	cartilage intermediate layer protein 2 [Source:MGI Symbol;Acc:MGI:1915959]
ENSMUSG00000040856	3.72818	0.538379	31.5125	1.98165e-08	1.63433e-05	chr12	+	109453455	109460700	NM_010052	Dlk1	delta-like 1 homolog (Drosophila) [Source:MGI Symbol;Acc:MGI:94900]
ENSMUSG00000027895	3.51413	0.403739	10.7287	0.00105486	0.0256884	chr3	-	107459552	107438303	NM_145922	Kcnc4	potassium voltage gated channel, Shaw-related subfamily, member 4 [Source:MGI Symbol;Acc:MGI:96670]
ENSMUSG00000033419	3.4329	2.81718	19.4746	1.01949e-05	0.00130021	chr9	-	86880439	86765923	NM_001277983	Snap91	synaptosomal-associated protein 91 [Source:MGI Symbol;Acc:MGI:109132]
ENSMUSG00000033377	3.43045	3.7209	34.0796	5.2902e-09	7.27167e-06	chr3	-	116968987	116918258	NM_023245	Palmd	palmdelphin [Source:MGI Symbol;Acc:MGI:2148896]
ENSMUSG00000010803	3.27758	1.10525	30.5369	3.27579e-08	2.22635e-05	chr11	-	42182930	42130939	NM_010250	Gabra1	gamma-aminobutyric acid (GABA) A receptor, subunit alpha 1 [Source:MGI Symbol;Acc:MGI:95613]
ENSMUSG00000024647	3.2439	-0.176657	16.1329	5.90478e-05	0.00407326	chr18	+	86711110	86718283	NM_001302356	Cbln2	cerebellin 2 precursor protein [Source:MGI Symbol;Acc:MGI:88282]
ENSMUSG00000070695	3.12132	3.33956	11.3026	0.000773995	0.021772	chr1	+	115684756	116587323	NM_001077425	Cntnap5a	contactin associated protein-like 5A [Source:MGI Symbol;Acc:MGI:3643623]
ENSMUSG00000005089	3.08177	0.374342	18.4188	1.77304e-05	0.00179165	chr2	+	102658659	102790784	NM_001077514	Slc1a2	solute carrier family 1 (glial high affinity glutamate transporter), member 2 [Source:MGI Symbol;Acc:MGI:101931]
ENSMUSG00000041607	3.0021	2.25678	22.8749	1.72893e-06	0.000375238	chr18	+	82475146	82558703	NM_001025245	Mbp	myelin basic protein [Source:MGI Symbol;Acc:MGI:96925]
ENSMUSG00000022055	2.95461	4.45093	17.2039	3.35739e-05	0.00273252	chr14	+	68083863	68089095	NM_010910	Nefl	neurofilament, light polypeptide [Source:MGI Symbol;Acc:MGI:97313]
ENSMUSG00000027559	2.86843	10.6727	11.2708	0.000787347	0.0220368	chr3	+	14863538	14872523	NM_007606	Car3	carbonic anhydrase 3 [Source:MGI Symbol;Acc:MGI:88270]
ENSMUSG00000092083	2.85128	-0.283977	13.3658	0.000256257	0.011202	chr1	+	15312452	15723750	NM_001098528	Kcnb2	potassium voltage gated channel, Shab-related subfamily, member 2 [Source:MGI Symbol;Acc:MGI:99632]
ENSMUSG00000052516	2.83299	0.205295	20.5376	5.84709e-06	0.000861123	chr16	-	74410989	73892306	NM_175549	Robo2	roundabout homolog 2 (Drosophila) [Source:MGI Symbol;Acc:MGI:1890110]
ENSMUSG00000020377	2.80874	-0.0513577	10.6651	0.00109179	0.0259653	chr11	-	50238532	50236472	NM_008521	Ltc4s	leukotriene C4 synthase [Source:MGI Symbol;Acc:MGI:107498]
ENSMUSG00000020905	2.80144	0.527464	14.7002	0.000126034	0.00708715	chr11	-	67922153	67854523	NM_173754	Usp43	ubiquitin specific peptidase 43 [Source:MGI Symbol;Acc:MGI:2444541]
ENSMUSG00000051159	2.78141	2.00478	20.9599	4.68998e-06	0.000735787	chrX	-	102252181	102247381	NM_001276473	Cited1	Cbp/p300-interacting transactivator with Glu/Asp-rich carboxy-terminal domain 1 [Source:MGI Symbol;Acc:MGI:108023]
ENSMUSG00000024471	2.7674	5.72601	9.29182	0.0023018	0.0409231	chr18	+	44334074	44355724	NM_001033621	Myot	myotilin [Source:MGI Symbol;Acc:MGI:1889800]
ENSMUSG00000075318	2.75758	0.932296	17.1596	3.43672e-05	0.00276076	chr2	+	65670445	65767447	NM_001099298	Scn2a1	sodium channel, voltage-gated, type II, alpha 1 [Source:MGI Symbol;Acc:MGI:98248]
ENSMUSG00000025608	2.74253	3.2465	24.5074	7.40254e-07	0.000212969	chr6	-	31563981	31519488	NM_013723	Podxl	podocalyxin-like [Source:MGI Symbol;Acc:MGI:1351317]
ENSMUSG00000058624	2.73355	1.22277	18.1547	2.0367e-05	0.00194213	chr19	-	21472672	21391307	NM_010266	Gda	guanine deaminase [Source:MGI Symbol;Acc:MGI:95678]
ENSMUSG00000021730	2.67645	0.0923529	14.3932	0.000148334	0.00794691	chr13	+	117602480	117976802	NM_010408	Hcn1	hyperpolarization-activated, cyclic nucleotide-gated K+ 1 [Source:MGI Symbol;Acc:MGI:1096392]
ENSMUSG00000037016	2.66404	6.61785	18.5103	1.68991e-05	0.0017568	chr3	-	53657355	53513938	NM_172862	Frem2	Fras1 related extracellular matrix protein 2 [Source:MGI Symbol;Acc:MGI:2444465]
ENSMUSG00000061601	2.66184	1.23425	32.7322	1.0577e-08	1.00652e-05	chr5	+	14514918	14795993	NM_001110796	Pclo	piccolo (presynaptic cytomatrix protein) [Source:MGI Symbol;Acc:MGI:1349390]
ENSMUSG00000027009	2.62668	6.88544	29.0896	6.91054e-08	3.88592e-05	chr2	+	79255500	79333123	NM_010576	Itga4	integrin alpha 4 [Source:MGI Symbol;Acc:MGI:96603]
ENSMUSG00000021815	2.62426	2.25513	14.8345	0.000117366	0.00667496	chr14	-	20496901	20482864	NM_029104	Mss51	MSS51 mitochondrial translational activator [Source:MGI Symbol;Acc:MGI:1922093]
ENSMUSG00000027500	2.57771	2.99149	19.311	1.11063e-05	0.00134702	chr3	+	8509360	8561606	NM_025285	Stmn2	stathmin-like 2 [Source:MGI Symbol;Acc:MGI:98241]
ENSMUSG00000047819	2.57076	1.62124	14.6278	0.000130966	0.00720079	chr3	+	84593574	84597032	NM_207278	Tigd4	tigger transposable element derived 4 [Source:MGI Symbol;Acc:MGI:2685264]
ENSMUSG00000038112	2.54562	4.83427	15.6675	7.55125e-05	0.00493294	chr9	-	39604124	39587396	NM_178737	AW551984	expressed sequence AW551984 [Source:MGI Symbol;Acc:MGI:2143322]
ENSMUSG00000038259	2.53456	0.441119	9.10631	0.0025473	0.0434657	chr2	-	155945367	155941023	NM_008109	Gdf5	growth differentiation factor 5 [Source:MGI Symbol;Acc:MGI:95688]
ENSMUSG00000023043	2.49132	4.59256	13.6684	0.000218098	0.00991947	chr15	+	102028216	102032026	NM_010664	Krt18	keratin 18 [Source:MGI Symbol;Acc:MGI:96692]
ENSMUSG00000015957	2.44185	0.432588	8.51105	0.00352996	0.0513755	chr7	+	98835131	98855195	NM_001285792	Wnt11	wingless-type MMTV integration site family, member 11 [Source:MGI Symbol;Acc:MGI:101948]
ENSMUSG00000021640	2.40306	2.65066	10.4967	0.00119588	0.0273392	chr13	-	100446406	100407770	NM_008670	Naip1	NLR family, apoptosis inhibitory protein 1 [Source:MGI Symbol;Acc:MGI:1298223]
ENSMUSG00000040747	2.36281	4.31924	13.3777	0.000254628	0.0111702	chr3	-	106790149	106759921	NM_007651	Cd53	CD53 antigen [Source:MGI Symbol;Acc:MGI:88341]
ENSMUSG00000004633	2.33904	1.19135	22.4643	2.14085e-06	0.000441407	chr6	+	54039573	54300721	NM_001163640	Chn2	chimerin 2 [Source:MGI Symbol;Acc:MGI:1917243]
ENSMUSG00000026787	2.32362	-0.136778	13.9192	0.000190836	0.00925816	chr2	+	22622205	22693874	NM_008078	Gad2	glutamic acid decarboxylase 2 [Source:MGI Symbol;Acc:MGI:95634]
ENSMUSG00000022269	2.28541	1.65336	25.3072	4.88878e-07	0.000163457	chr15	+	26309064	26409576	NM_177597	March11	membrane-associated ring finger (C3HC4) 11 [Source:MGI Symbol;Acc:MGI:3608327]
ENSMUSG00000097636	2.27994	1.91163	12.3362	0.000444264	0.0155254	chr19	-	53464796	53441212	NR_028427	5830416P10Rik	RIKEN cDNA 5830416P10 gene [Source:MGI Symbol;Acc:MGI:1922001]
ENSMUSG00000052854	2.26593	2.49103	22.058	2.64538e-06	0.000511343	chrX	+	138914430	139009092	NM_013724	Nrk	Nik related kinase [Source:MGI Symbol;Acc:MGI:1351326]
ENSMUSG00000007653	2.25996	1.39264	15.55	8.03508e-05	0.00506349	chr11	+	42419757	42629028	NM_008070	Gabrb2	gamma-aminobutyric acid (GABA) A receptor, subunit beta 2 [Source:MGI Symbol;Acc:MGI:95620]
ENSMUSG00000038216	2.24215	-0.0088616	6.75491	0.009349	0.0833232	chr11	+	98386450	98388181	NM_008890	Pnmt	phenylethanolamine-N-methyltransferase [Source:MGI Symbol;Acc:MGI:97724]
ENSMUSG00000024027	2.24177	0.920885	13.6135	0.000224565	0.0100656	chr17	+	30901867	30936510	NM_021332	Glp1r	glucagon-like peptide 1 receptor [Source:MGI Symbol;Acc:MGI:99571]
ENSMUSG00000048142	2.22176	0.480676	10.4155	0.00124965	0.0283139	chr5	+	33995984	34005916	NM_001001985	Nat8l	N-acetyltransferase 8-like [Source:MGI Symbol;Acc:MGI:2447776]
ENSMUSG00000021944	2.21657	2.15731	28.6964	8.46591e-08	4.55356e-05	chr14	-	63245248	63198922	NM_008092	Gata4	GATA binding protein 4 [Source:MGI Symbol;Acc:MGI:95664]
ENSMUSG00000022054	2.21117	2.74272	14.2827	0.000157305	0.00831633	chr14	-	68124846	68119283	NM_008691	Nefm	neurofilament, medium polypeptide [Source:MGI Symbol;Acc:MGI:97314]
ENSMUSG00000048939	2.20923	3.57829	13.7045	0.000213936	0.0097942	chr16	-	29378732	29231851	NM_175650	Atp13a5	ATPase type 13A5 [Source:MGI Symbol;Acc:MGI:2444068]
ENSMUSG00000050505	2.208	0.82898	6.71451	0.00956313	0.0843095	chr14	-	88471396	88464743	NM_178685	Pcdh20	protocadherin 20 [Source:MGI Symbol;Acc:MGI:2443376]
ENSMUSG00000051985	2.19258	4.57761	8.6134	0.00333699	0.0499331	chr1	-	136006342	135953585	NM_177642	Igfn1	immunoglobulin-like and fibronectin type III domain containing 1 [Source:MGI Symbol;Acc:MGI:3045352]
ENSMUSG00000090942	2.19117	2.79162	9.48415	0.00207254	0.0383823	chr18	+	60293380	60303016	NM_001101475	F830016B08Rik	RIKEN cDNA F830016B08 gene [Source:MGI Symbol;Acc:MGI:3588218]
ENSMUSG00000060726	2.16913	1.10357	8.02903	0.00460335	0.058933	chrX	-	135720673	135718667	NM_030106	Tmsb15a	thymosin beta 15a [Source:MGI Symbol;Acc:MGI:1925728]
ENSMUSG00000096887	2.16447	0.954371	6.25538	0.0123817	0.0949621	chr6	+	79818031	79818364	NM_001190732	Gm20594	predicted gene, 20594 [Source:MGI Symbol;Acc:MGI:5295700]
ENSMUSG00000020435	2.15558	3.21885	11.482	0.000702749	0.0204558	chr11	-	3722216	3703731	NM_001302630	Osbp2	oxysterol binding protein 2 [Source:MGI Symbol;Acc:MGI:1921559]
ENSMUSG00000025494	2.1332	2.41367	9.46809	0.00209077	0.0384046	chr7	-	141100546	141091175	NM_023059	Sigirr	single immunoglobulin and toll-interleukin 1 receptor (TIR) domain [Source:MGI Symbol;Acc:MGI:1344402]
ENSMUSG00000040723	2.10334	1.66146	6.33328	0.0118493	0.0936336	chr1	-	165708086	165646516	NM_001038846	Rcsd1	RCSD domain containing 1 [Source:MGI Symbol;Acc:MGI:2676394]
ENSMUSG00000000142	2.09512	1.47759	9.9964	0.00156847	0.0322939	chr11	+	108920349	108950783	NM_015732	Axin2	axin2 [Source:MGI Symbol;Acc:MGI:1270862]
ENSMUSG00000052914	2.08683	4.94128	9.46809	0.00209076	0.0384046	chr4	-	96553661	96516138	NM_010008	Cyp2j6	cytochrome P450, family 2, subfamily j, polypeptide 6 [Source:MGI Symbol;Acc:MGI:1270148]
ENSMUSG00000038916	2.08627	2.31206	16.1454	5.86613e-05	0.00407326	chr10	+	29143996	29199630	NM_026138	Soga3	SOGA family member 3 [Source:MGI Symbol;Acc:MGI:1914662]
ENSMUSG00000056296	2.08443	0.207448	17.4977	2.87652e-05	0.00243736	chr14	+	13284780	13615459	NM_028052	Synpr	synaptoporin [Source:MGI Symbol;Acc:MGI:1919253]
ENSMUSG00000027919	2.07485	0.809823	10.7035	0.00106933	0.0258024	chr3	-	92752338	92750148	NM_025413	Lce1g	late cornified envelope 1G [Source:MGI Symbol;Acc:MGI:1913445]
ENSMUSG00000028354	2.05914	-0.113217	7.72637	0.00544201	0.0638181	chr1	+	174501825	174822729	NM_019445	Fmn2	formin 2 [Source:MGI Symbol;Acc:MGI:1859252]
ENSMUSG00000030000	2.03939	4.68832	10.7769	0.00102772	0.0253887	chr6	+	86078084	86119555	NM_001271858	Add2	adducin 2 (beta) [Source:MGI Symbol;Acc:MGI:87919]
ENSMUSG00000035681	2.02328	1.01961	12.8008	0.000346478	0.0136506	chr10	+	112271123	112466304	NM_001025581	Kcnc2	potassium voltage gated channel, Shaw-related subfamily, member 2 [Source:MGI Symbol;Acc:MGI:96668]
ENSMUSG00000042045	2.01755	4.11706	7.34295	0.00673264	0.07094	chr9	+	53850251	53853844	NM_025540	Sln	sarcolipin [Source:MGI Symbol;Acc:MGI:1913652]
ENSMUSG00000038068	2.00374	2.41824	18.2003	1.98846e-05	0.00192182	chr13	+	47122720	47247991	NM_146042	Rnf144b	ring finger protein 144B [Source:MGI Symbol;Acc:MGI:2384986]
ENSMUSG00000041552	1.99087	1.65595	15.8933	6.70147e-05	0.00448129	chrX	-	155623325	155573455	NM_001093750	Ptchd1	patched domain containing 1 [Source:MGI Symbol;Acc:MGI:2685233]
ENSMUSG00000020181	1.98781	5.49414	20.2832	6.67842e-06	0.0009283	chr10	-	110000219	109682660	NM_001081035	Nav3	neuron navigator 3 [Source:MGI Symbol;Acc:MGI:2183703]
ENSMUSG00000049436	1.9782	2.35502	11.9078	0.000559002	0.0179151	chr16	-	38800203	38773184	NM_178924	Upk1b	uroplakin 1B [Source:MGI Symbol;Acc:MGI:98912]
ENSMUSG00000039579	1.9756	0.76849	7.91789	0.00489483	0.0604412	chr4	-	49845549	49661611	NM_001276355	Grin3a	glutamate receptor ionotropic, NMDA3A [Source:MGI Symbol;Acc:MGI:1933206]
ENSMUSG00000040605	1.96127	1.77378	21.0561	4.46034e-06	0.000724352	chr16	+	97356728	97439012	NM_019517	Bace2	beta-site APP-cleaving enzyme 2 [Source:MGI Symbol;Acc:MGI:1860440]
ENSMUSG00000031351	1.95126	2.82984	13.5779	0.000228859	0.010221	chrX	+	72987360	73031543	NM_001109043	Zfp185	zinc finger protein 185 [Source:MGI Symbol;Acc:MGI:108095]
ENSMUSG00000047686	1.93706	0.599022	7.19252	0.00732082	0.0736907	chrX	-	106840644	106837082	NM_199468	Zcchc5	zinc finger, CCHC domain containing 5 [Source:MGI Symbol;Acc:MGI:2685221]
ENSMUSG00000090462	1.93633	1.67972	11.8894	0.000564553	0.0179539	chr14	-	42095277	42089750	NR_073362	1700091H14Rik	RIKEN cDNA 1700091H14 gene [Source:MGI Symbol;Acc:MGI:1920803]
ENSMUSG00000019817	1.91614	4.95312	20.288	6.66167e-06	0.0009283	chr10	+	13090788	13131694	NM_009538	Plagl1	pleiomorphic adenoma gene-like 1 [Source:MGI Symbol;Acc:MGI:1100874]
ENSMUSG00000036242	1.91349	5.41118	7.72969	0.00543202	0.0638181	chr14	-	49783383	49681560	NM_026142	3632451O06Rik	RIKEN cDNA 3632451O06 gene [Source:MGI Symbol;Acc:MGI:1914669]
ENSMUSG00000040310	1.89843	0.0133795	6.84494	0.00888926	0.0813103	chr2	+	93642384	93681339	NM_007442	Alx4	aristaless-like homeobox 4 [Source:MGI Symbol;Acc:MGI:108359]
ENSMUSG00000035277	1.89077	2.10468	10.6222	0.00111736	0.0262294	chrX	+	93286496	93298357	NM_001305940	Arx	aristaless related homeobox [Source:MGI Symbol;Acc:MGI:1097716]
ENSMUSG00000027985	1.88993	3.47017	19.9525	7.93899e-06	0.00106754	chr3	+	131110471	131224356	NM_010703	Lef1	lymphoid enhancer binding factor 1 [Source:MGI Symbol;Acc:MGI:96770]
ENSMUSG00000073565	1.88859	0.089196	16.8554	4.0339e-05	0.00302445	chr18	+	51117898	51304641	NM_001081224	Prr16	proline rich 16 [Source:MGI Symbol;Acc:MGI:1918623]
ENSMUSG00000026678	1.88856	5.99573	14.643	0.00012992	0.00717515	chr1	+	169655501	169695813	NM_009063	Rgs5	regulator of G-protein signaling 5 [Source:MGI Symbol;Acc:MGI:1098434]
ENSMUSG00000036523	1.88695	0.95466	12.5854	0.000388765	0.0144427	chr12	-	16800684	16670615	NM_015764	Greb1	gene regulated by estrogen in breast cancer protein [Source:MGI Symbol;Acc:MGI:2149712]
ENSMUSG00000038530	1.88458	4.68751	12.274	0.00045931	0.0157368	chr1	-	169747642	169741477	NM_009062	Rgs4	regulator of G-protein signaling 4 [Source:MGI Symbol;Acc:MGI:108409]
ENSMUSG00000074652	1.88262	3.63653	8.12413	0.00436799	0.0577312	chr2	+	155611212	155634307	NM_001085378	Myh7b	myosin, heavy chain 7B, cardiac muscle, beta [Source:MGI Symbol;Acc:MGI:3710243]
ENSMUSG00000046157	1.87556	2.59709	15.3002	9.17083e-05	0.00548079	chr12	-	78983478	78961795	NM_001170401	Tmem229b	transmembrane protein 229B [Source:MGI Symbol;Acc:MGI:2444389]
ENSMUSG00000045790	1.87555	0.192723	14.2654	0.00015876	0.00835754	chr5	-	52471521	52374651	NM_001256059	Ccdc149	coiled-coil domain containing 149 [Source:MGI Symbol;Acc:MGI:2685293]
ENSMUSG00000041544	1.87153	-0.1037	7.43864	0.00638383	0.0689924	chr4	-	148287965	148240264	NM_001083342	Ptchd2	patched domain containing 2 [Source:MGI Symbol;Acc:MGI:2444403]
ENSMUSG00000096035	1.86796	1.4358	10.4938	0.00119779	0.0273392	chr5	+	91987475	91995320	NM_001177577	Gm1045	predicted gene 1045 [Source:MGI Symbol;Acc:MGI:2685891]
ENSMUSG00000060548	1.86066	4.94851	16.8308	4.08637e-05	0.00304533	chr14	-	61046855	60963834	NM_013869	Tnfrsf19	tumor necrosis factor receptor superfamily, member 19 [Source:MGI Symbol;Acc:MGI:1352474]
ENSMUSG00000079022	1.84498	0.405948	11.5854	0.000664713	0.0197672	chr15	-	72034227	71795795	NM_027174	Col22a1	collagen, type XXII, alpha 1 [Source:MGI Symbol;Acc:MGI:1916950]
ENSMUSG00000029121	1.83973	2.20033	14.0778	0.000175405	0.00882087	chr5	+	37242080	37292133	NM_001136058	Crmp1	collapsin response mediator protein 1 [Source:MGI Symbol;Acc:MGI:107793]
ENSMUSG00000028217	1.83666	1.35013	12.4877	0.000409641	0.0149049	chr4	+	11758147	11817895	NM_019753	Cdh17	cadherin 17 [Source:MGI Symbol;Acc:MGI:1095414]
ENSMUSG00000028214	1.8217	2.63122	15.6417	7.65485e-05	0.00493294	chr4	+	11704457	11714752	NM_010276	Gem	GTP binding protein (gene overexpressed in skeletal muscle) [Source:MGI Symbol;Acc:MGI:99844]
ENSMUSG00000032968	1.82056	4.51644	11.7729	0.000600984	0.018452	chr1	+	75507077	75510366	NM_010564	Inha	inhibin alpha [Source:MGI Symbol;Acc:MGI:96569]
ENSMUSG00000069874	1.78806	3.24675	7.87541	0.00501114	0.0611972	chr11	+	58215028	58222779	NM_019440	Irgm2	immunity-related GTPase family M member 2 [Source:MGI Symbol;Acc:MGI:1926262]
ENSMUSG00000021306	1.78519	3.97932	16.1414	5.8784e-05	0.00407326	chr13	-	13393624	13357623	NM_031999	Gpr137b	G protein-coupled receptor 137B [Source:MGI Symbol;Acc:MGI:1891463]
ENSMUSG00000028132	1.7826	1.28588	11.9918	0.000534344	0.0175475	chr3	-	121263340	121202008	NM_178936	Tmem56	transmembrane protein 56 [Source:MGI Symbol;Acc:MGI:1923195]
ENSMUSG00000034336	1.77823	-0.0947398	8.90321	0.00284669	0.0460948	chr19	+	47014698	47025327	NM_146100	Ina	internexin neuronal intermediate filament protein, alpha [Source:MGI Symbol;Acc:MGI:96568]
ENSMUSG00000044548	1.77518	1.11346	7.51141	0.00613094	0.0679784	chr12	+	71309884	71320107	NM_021532	Dact1	dapper homolog 1, antagonist of beta-catenin (xenopus) [Source:MGI Symbol;Acc:MGI:1891740]
ENSMUSG00000028017	1.76358	1.98076	6.79968	0.00911744	0.0823773	chr3	-	129755316	129677565	NM_010113	Egf	epidermal growth factor [Source:MGI Symbol;Acc:MGI:95290]
ENSMUSG00000050147	1.76209	-0.14563	11.2597	0.000792095	0.0221197	chr8	+	72761880	72763874	NM_007975	F2rl3	coagulation factor II (thrombin) receptor-like 3 [Source:MGI Symbol;Acc:MGI:1298207]
ENSMUSG00000032281	1.72597	3.4013	12.1632	0.000487426	0.0163687	chr9	-	54661870	54604877	NM_053178	Acsbg1	acyl-CoA synthetase bubblegum family member 1 [Source:MGI Symbol;Acc:MGI:2385656]
ENSMUSG00000057897	1.72594	5.32687	6.78875	0.00917339	0.0824753	chr11	-	6065748	5969644	NM_007595	Camk2b	calcium/calmodulin-dependent protein kinase II, beta [Source:MGI Symbol;Acc:MGI:88257]
ENSMUSG00000031548	1.70088	0.958213	12.6617	0.000373232	0.0142069	chr8	+	23411502	23449632	NM_013834	Sfrp1	secreted frizzled-related protein 1 [Source:MGI Symbol;Acc:MGI:892014]
ENSMUSG00000031778	1.67147	5.57049	15.998	6.34078e-05	0.00430999	chr8	+	94772009	94782423	NM_009142	Cx3cl1	chemokine (C-X3-C motif) ligand 1 [Source:MGI Symbol;Acc:MGI:1097153]
ENSMUSG00000035314	1.66917	3.4094	10.8898	0.000966946	0.0247151	chr7	+	99381549	99460983	NM_201352	Gdpd5	glycerophosphodiester phosphodiesterase domain containing 5 [Source:MGI Symbol;Acc:MGI:2686926]
ENSMUSG00000052889	1.66461	5.03395	11.2489	0.000796713	0.0221985	chr7	+	122289297	122628655	NM_008855	Prkcb	protein kinase C, beta [Source:MGI Symbol;Acc:MGI:97596]
ENSMUSG00000063268	1.64492	1.33905	12.2705	0.000460171	0.0157368	chr15	-	76243420	76233003	NM_001163576	Parp10	poly (ADP-ribose) polymerase family, member 10 [Source:MGI Symbol;Acc:MGI:3712326]
ENSMUSG00000027636	1.63841	0.0597458	6.1946	0.0128141	0.0960598	chr2	-	156887078	156872457	NM_029983	Sla2	Src-like-adaptor 2 [Source:MGI Symbol;Acc:MGI:1925049]
ENSMUSG00000020607	1.63688	3.63235	7.23833	0.00713633	0.0726613	chr12	-	14152038	14147599	NM_029007	Fam84a	family with sequence similarity 84, member A [Source:MGI Symbol;Acc:MGI:2145011]
ENSMUSG00000063450	1.63498	5.09005	13.7556	0.000208199	0.00961055	chr12	+	75818318	76110900	NM_001005510	Syne2	spectrin repeat containing, nuclear envelope 2 [Source:MGI Symbol;Acc:MGI:2449316]
ENSMUSG00000056476	1.62473	2.13732	7.26961	0.00701311	0.0721645	chr3	+	59006487	59318682	NM_177855	Med12l	mediator complex subunit 12-like [Source:MGI Symbol;Acc:MGI:2139916]
ENSMUSG00000015981	1.6074	0.347347	10.9242	0.000949183	0.0244632	chr7	-	139188517	139103638	NM_021302	Stk32c	serine/threonine kinase 32C [Source:MGI Symbol;Acc:MGI:2385336]
ENSMUSG00000052613	1.60121	1.01721	9.60053	0.00194521	0.0374323	chr10	+	73821883	74632664	NM_001142741	Pcdh15	protocadherin 15 [Source:MGI Symbol;Acc:MGI:1891428]
ENSMUSG00000014813	1.59782	2.9985	8.17373	0.00425014	0.0570266	chr14	+	69029289	69041401	NM_009285	Stc1	stanniocalcin 1 [Source:MGI Symbol;Acc:MGI:109131]
ENSMUSG00000031872	1.59551	1.66843	9.24394	0.00236276	0.0415397	chr8	+	104170513	104219092	NM_001141922	Bean1	brain expressed, associated with Nedd4, 1 [Source:MGI Symbol;Acc:MGI:1929597]
ENSMUSG00000039904	1.59029	3.73985	11.7409	0.000611415	0.0185388	chr6	-	25690729	25667503	NM_010338	Gpr37	G protein-coupled receptor 37 [Source:MGI Symbol;Acc:MGI:1313297]	Interacts with Parkin, i.e. invloved in parkinsons disease. Upregulation cause protein misfolding, if severe induces cell death or ER stress
ENSMUSG00000042671	1.58576	0.831696	8.5857	0.00338814	0.0503177	chr1	+	153653025	153700323	NM_026380	Rgs8	regulator of G-protein signaling 8 [Source:MGI Symbol;Acc:MGI:108408]
ENSMUSG00000074793	1.58249	3.41114	10.0342	0.00153661	0.0319485	chr2	+	131127280	131146321	NM_028306	Hspa12b	heat shock protein 12B [Source:MGI Symbol;Acc:MGI:1919880]
ENSMUSG00000048450	1.58209	0.912102	12.4557	0.000416714	0.0151178	chr5	-	37824583	37820485	NM_010835	Msx1	msh homeobox 1 [Source:MGI Symbol;Acc:MGI:97168]
ENSMUSG00000064325	1.57198	2.77471	6.98961	0.00819844	0.0778148	chr8	-	80058006	79970345	NM_020259	Hhip	Hedgehog-interacting protein [Source:MGI Symbol;Acc:MGI:1341847]
ENSMUSG00000032224	1.57064	0.732035	7.89617	0.00495397	0.0608595	chr9	-	70141578	70089310	NM_029784	Fam81a	family with sequence similarity 81, member A [Source:MGI Symbol;Acc:MGI:1924136]
ENSMUSG00000037386	1.5644	1.81268	8.68341	0.00321119	0.0489836	chr15	+	39198363	39681764	NM_001256383	Rims2	regulating synaptic membrane exocytosis 2 [Source:MGI Symbol;Acc:MGI:2152972]
ENSMUSG00000026638	1.56251	2.11003	7.59489	0.00585339	0.0661938	chr1	+	193153111	193172023	NM_016851	Irf6	interferon regulatory factor 6 [Source:MGI Symbol;Acc:MGI:1859211]
ENSMUSG00000032596	1.55912	0.183178	10.0288	0.00154115	0.0319892	chr9	+	107975534	107984056	NM_023738	Uba7	ubiquitin-like modifier activating enzyme 7 [Source:MGI Symbol;Acc:MGI:1349462]
ENSMUSG00000034330	1.54179	2.4946	18.4219	1.77009e-05	0.00179165	chr8	+	117498291	117635140	NM_172285	Plcg2	phospholipase C, gamma 2 [Source:MGI Symbol;Acc:MGI:97616]
ENSMUSG00000062627	1.53912	5.70934	7.72624	0.00544241	0.0638181	chr4	-	94979100	94942040	NM_177239	Mysm1	myb-like, SWIRM and MPN domains 1 [Source:MGI Symbol;Acc:MGI:2444584]
ENSMUSG00000021250	1.53906	3.6631	7.36699	0.00664322	0.0703022	chr12	+	85473890	85477273	NM_010234	Fos	FBJ osteosarcoma oncogene [Source:MGI Symbol;Acc:MGI:95574]
ENSMUSG00000025478	1.5358	1.75457	11.9516	0.000546	0.0177533	chr7	+	139086001	139102704	NM_011993	Dpysl4	dihydropyrimidinase-like 4 [Source:MGI Symbol;Acc:MGI:1349764]
ENSMUSG00000018411	1.5347	2.05971	6.30833	0.0120172	0.094211	chr11	+	104231390	104332090	NM_001285454	Mapt	microtubule-associated protein tau [Source:MGI Symbol;Acc:MGI:97180]
ENSMUSG00000048915	1.53128	2.13281	16.8932	3.95422e-05	0.00298278	chr17	-	62881317	62604184	NM_207654	Efna5	ephrin A5 [Source:MGI Symbol;Acc:MGI:107444]
ENSMUSG00000015766	1.53091	5.55982	14.0366	0.000179283	0.00894317	chr6	-	137649285	137477245	NM_007945	Eps8	epidermal growth factor receptor pathway substrate 8 [Source:MGI Symbol;Acc:MGI:104684]
ENSMUSG00000029814	1.52808	4.63184	38.7834	4.73529e-10	9.76338e-07	chr6	-	49214954	49085221	NM_023670	Igf2bp3	insulin-like growth factor 2 mRNA binding protein 3 [Source:MGI Symbol;Acc:MGI:1890359]
ENSMUSG00000027560	1.52478	2.32075	7.81668	0.00517662	0.0621144	chr2	+	170731807	170879769	NM_001163686	Dok5	docking protein 5 [Source:MGI Symbol;Acc:MGI:1924079]
ENSMUSG00000032452	1.52337	2.09158	10.5966	0.00113295	0.0264367	chr9	-	98033181	97444395	NM_022319	Clstn2	calsyntenin 2 [Source:MGI Symbol;Acc:MGI:1929897]
ENSMUSG00000037010	1.52307	4.05699	9.11639	0.0025333	0.0432865	chrX	-	48034853	48025146	NM_013912	Apln	apelin [Source:MGI Symbol;Acc:MGI:1353624]
ENSMUSG00000052085	1.52091	5.4585	11.4917	0.000699074	0.0203968	chr19	+	24999529	25202432	NM_028785	Dock8	dedicator of cytokinesis 8 [Source:MGI Symbol;Acc:MGI:1921396]
ENSMUSG00000017978	1.51641	1.04351	10.582	0.00114193	0.0265541	chr6	-	23839420	23262773	NM_001252106	Cadps2	Ca2+-dependent activator protein for secretion 2 [Source:MGI Symbol;Acc:MGI:2443963]
ENSMUSG00000031880	1.51494	4.84209	10.1595	0.00143558	0.0308862	chr8	-	104631321	104628066	NM_019662	Rrad	Ras-related associated with diabetes [Source:MGI Symbol;Acc:MGI:1930943]
ENSMUSG00000042834	1.50679	6.55756	15.5434	8.06328e-05	0.00506349	chr18	-	33463634	33437019	NM_053078	Nrep	neuronal regeneration related protein [Source:MGI Symbol;Acc:MGI:99444]
ENSMUSG00000044244	1.49195	0.737162	11.9153	0.000556748	0.017911	chr9	-	100486788	100457719	NM_001033543	Il20rb	interleukin 20 receptor beta [Source:MGI Symbol;Acc:MGI:2143266]
ENSMUSG00000039385	1.48756	1.45154	10.7882	0.0010215	0.0253754	chr15	-	13173639	13034200	NM_007666	Cdh6	cadherin 6 [Source:MGI Symbol;Acc:MGI:107435]
ENSMUSG00000000889	1.48671	1.03755	11.5787	0.00066712	0.0197912	chr2	+	27165233	27183200	NM_138942	Dbh	dopamine beta hydroxylase [Source:MGI Symbol;Acc:MGI:94864]
ENSMUSG00000038608	1.48573	1.93054	6.88737	0.00868068	0.0800006	chr1	-	80758448	80501073	NM_175291	Dock10	dedicator of cytokinesis 10 [Source:MGI Symbol;Acc:MGI:2146320]
ENSMUSG00000048218	1.47429	4.04982	8.82989	0.00296336	0.0472419	chr15	-	97247287	97244074	NM_001164602	Amigo2	adhesion molecule with Ig like domain 2 [Source:MGI Symbol;Acc:MGI:2145995]
ENSMUSG00000041771	1.46684	4.01515	10.0749	0.00150302	0.0315686	chr12	+	102129174	102266749	NM_172152	Slc24a4	solute carrier family 24 (sodium/potassium/calcium exchanger), member 4 [Source:MGI Symbol;Acc:MGI:2447362]
ENSMUSG00000079428	1.45517	6.70288	6.78467	0.0091944	0.0826027	chrX	+	136224041	136226100	NM_001127169	Tceal7	transcription elongation factor A (SII)-like 7 [Source:MGI Symbol;Acc:MGI:1915746]
ENSMUSG00000022906	1.45379	0.11019	7.30696	0.00686881	0.0716476	chr16	+	35938470	35972605	NM_030253	Parp9	poly (ADP-ribose) polymerase family, member 9 [Source:MGI Symbol;Acc:MGI:1933117]
ENSMUSG00000066842	1.44818	0.445106	12.6742	0.000370728	0.0141582	chr1	-	150993051	150562524	NM_001024720	Hmcn1	hemicentin 1 [Source:MGI Symbol;Acc:MGI:2685047]
ENSMUSG00000033022	1.44705	-0.133371	8.41811	0.00371501	0.0528865	chr18	-	46728342	46713205	NM_033037	Cdo1	cysteine dioxygenase 1, cytosolic [Source:MGI Symbol;Acc:MGI:105925]
ENSMUSG00000041911	1.446	2.87685	11.071	0.000876861	0.0233034	chr2	+	71528113	71533980	NM_010053	Dlx1	distal-less homeobox 1 [Source:MGI Symbol;Acc:MGI:94901]
ENSMUSG00000039470	1.43222	2.40679	9.1664	0.00246498	0.042769	chr8	+	40423815	40485725	NM_178395	Zdhhc2	zinc finger, DHHC domain containing 2 [Source:MGI Symbol;Acc:MGI:1923452]
ENSMUSG00000048582	1.4306	2.08039	7.38115	0.00659112	0.0699303	chr14	-	57058030	57035608	NM_016975	Gja3	gap junction protein, alpha 3 [Source:MGI Symbol;Acc:MGI:95714]
ENSMUSG00000040624	1.42538	0.151317	7.94205	0.00482992	0.0600368	chr10	+	3740364	3967303	NM_001159942	Plekhg1	pleckstrin homology domain containing, family G (with RhoGef domain) member 1 [Source:MGI Symbol;Acc:MGI:2676551]
ENSMUSG00000036585	1.42425	2.41413	6.10512	0.0134791	0.0989614	chr18	-	38918771	38838673	NM_010197	Fgf1	fibroblast growth factor 1 [Source:MGI Symbol;Acc:MGI:95515]
ENSMUSG00000068587	1.40934	1.28007	11.3354	0.000760439	0.0216262	chr6	+	40628831	40769123	NM_001171003	Mgam	maltase-glucoamylase [Source:MGI Symbol;Acc:MGI:1203495]
ENSMUSG00000034614	1.39518	1.90362	9.15698	0.00247771	0.0427901	chr11	+	3330401	3342971	NM_178149	Pik3ip1	phosphoinositide-3-kinase interacting protein 1 [Source:MGI Symbol;Acc:MGI:1917016]
ENSMUSG00000057914	1.39222	1.26964	7.29853	0.00690109	0.0718027	chr2	+	14604306	14987908	NM_023116	Cacnb2	calcium channel, voltage-dependent, beta 2 subunit [Source:MGI Symbol;Acc:MGI:894644]
ENSMUSG00000028572	1.38782	3.3985	7.02349	0.00804474	0.0773492	chr4	+	95967240	96025413	NM_030014	Hook1	hook homolog 1 (Drosophila) [Source:MGI Symbol;Acc:MGI:1925213]
ENSMUSG00000048826	1.38517	0.445433	7.94441	0.00482361	0.0600368	chr17	-	14203831	14195231	NM_172826	Dact2	dapper homolog 2, antagonist of beta-catenin (xenopus) [Source:MGI Symbol;Acc:MGI:1920347]
ENSMUSG00000022449	1.38274	4.36935	6.41671	0.0113051	0.0914089	chr15	-	94404258	94270163	NM_177431	Adamts20	a disintegrin-like and metallopeptidase (reprolysin type) with thrombospondin type 1 motif, 20 [Source:MGI Symbol;Acc:MGI:2660628]
ENSMUSG00000039629	1.37988	3.62107	21.7297	3.13897e-06	0.000579586	chr6	+	29917013	29959681	NM_001037740	Strip2	striatin interacting protein 2 [Source:MGI Symbol;Acc:MGI:2444363]
ENSMUSG00000041261	1.37572	2.7246	8.71978	0.00314776	0.0486155	chr4	-	8239041	8143362	NM_007592	Car8	carbonic anhydrase 8 [Source:MGI Symbol;Acc:MGI:88253]
ENSMUSG00000024812	1.36702	4.94698	13.7066	0.000213703	0.0097942	chr19	-	24225026	24094523	NM_001198985	Tjp2	tight junction protein 2 [Source:MGI Symbol;Acc:MGI:1341872]
ENSMUSG00000033213	1.36701	2.64777	6.78872	0.00917356	0.0824753	chr2	+	122637850	122641191	NM_001004174	AA467197	expressed sequence AA467197 [Source:MGI Symbol;Acc:MGI:3034182]
ENSMUSG00000091055	1.36357	1.54201	7.41758	0.00645897	0.0692227	chr18	-	78057395	78043614	NM_001101038	Siglec15	sialic acid binding Ig-like lectin 15 [Source:MGI Symbol;Acc:MGI:3646642]
ENSMUSG00000034613	1.36114	0.18677	7.93701	0.00484339	0.0600979	chr10	+	122678782	122945795	NM_001110218	Ppm1h	protein phosphatase 1H (PP2C domain containing) [Source:MGI Symbol;Acc:MGI:2442087]
ENSMUSG00000039835	1.3547	4.19096	19.1416	1.21372e-05	0.00141651	chr10	+	18407675	18533892	NM_173390	Nhsl1	NHS-like 1 [Source:MGI Symbol;Acc:MGI:106390]
ENSMUSG00000032911	1.35436	4.37551	6.86169	0.00880634	0.080639	chr9	+	56865104	56899870	NM_139001	Cspg4	chondroitin sulfate proteoglycan 4 [Source:MGI Symbol;Acc:MGI:2153093]
ENSMUSG00000018387	1.35404	0.143004	8.681	0.00321544	0.048988	chr11	+	53457205	53467766	NM_027917	Shroom1	shroom family member 1 [Source:MGI Symbol;Acc:MGI:1919024]
ENSMUSG00000052485	1.34582	1.50005	6.5325	0.0105921	0.0882985	chr13	-	98694834	98686235	NM_001025606	Tmem171	transmembrane protein 171 [Source:MGI Symbol;Acc:MGI:2685751]
ENSMUSG00000066800	1.33824	1.19672	7.88907	0.00497345	0.0610006	chr1	+	153749426	153762401	NM_011882	Rnasel	ribonuclease L (2', 5'-oligoisoadenylate synthetase-dependent) [Source:MGI Symbol;Acc:MGI:1098272]
ENSMUSG00000033278	1.33729	3.94257	16.9247	3.88923e-05	0.00296998	chr17	-	67354459	66666848	NM_008984	Ptprm	protein tyrosine phosphatase, receptor type, M [Source:MGI Symbol;Acc:MGI:102694]
ENSMUSG00000046591	1.33357	2.66028	9.76472	0.00177893	0.0350991	chr7	+	79660196	79698134	NM_029835	Ticrr	TOPBP1-interacting checkpoint and replication regulator [Source:MGI Symbol;Acc:MGI:1924261]
ENSMUSG00000033308	1.32409	1.355	10.496	0.00119636	0.0273392	chr3	+	118562129	119432924	NM_170778	Dpyd	dihydropyrimidine dehydrogenase [Source:MGI Symbol;Acc:MGI:2139667]
ENSMUSG00000044951	1.32101	5.83718	7.94867	0.00481227	0.0600161	chr13	-	32781779	32700827	NM_001166030	Mylk4	myosin light chain kinase family, member 4 [Source:MGI Symbol;Acc:MGI:3643758]
ENSMUSG00000075012	1.32078	1.37743	7.84287	0.00510215	0.0616393	chr2	-	102452499	102449366	NM_010218	Fjx1	four jointed box 1 (Drosophila) [Source:MGI Symbol;Acc:MGI:1341907]
ENSMUSG00000021583	1.31726	3.47536	18.8931	1.38249e-05	0.00154079	chr13	+	74639872	74691875	NM_030711	Erap1	endoplasmic reticulum aminopeptidase 1 [Source:MGI Symbol;Acc:MGI:1933403]
ENSMUSG00000030022	1.31615	1.73964	9.57972	0.00196739	0.0376175	chr6	-	92901441	92772702	NM_175314	Adamts9	a disintegrin-like and metallopeptidase (reprolysin type) with thrombospondin type 1 motif, 9 [Source:MGI Symbol;Acc:MGI:1916320]
ENSMUSG00000029153	1.31453	5.06026	12.4234	0.000423989	0.0151347	chr5	-	73338992	73322199	NM_026950	Ociad2	OCIA domain containing 2 [Source:MGI Symbol;Acc:MGI:1916377]
ENSMUSG00000056145	1.30682	1.88449	9.93853	0.00161855	0.0329427	chr3	+	107039504	107054347	NR_033498	AI504432	expressed sequence AI504432 [Source:MGI Symbol;Acc:MGI:2139742]
ENSMUSG00000036617	1.30435	5.10601	15.0536	0.000104499	0.00606929	chr2	+	20510047	20810524	NM_178059	Etl4	enhancer trap locus 4 [Source:MGI Symbol;Acc:MGI:95454]
ENSMUSG00000019779	1.30344	4.08754	10.9425	0.000939824	0.0244074	chr10	+	34483400	34611226	NM_010237	Frk	fyn-related kinase [Source:MGI Symbol;Acc:MGI:103265]
ENSMUSG00000031608	1.29921	3.84745	10.1632	0.00143271	0.0308781	chr8	-	57653031	57523828	NM_144731	Galnt7	UDP-N-acetyl-alpha-D-galactosamine: polypeptide N-acetylgalactosaminyltransferase 7 [Source:MGI Symbol;Acc:MGI:1349449]
ENSMUSG00000069793	1.2903	3.8175	9.44908	0.00211255	0.038507	chr11	-	82991830	82979629	NM_172796	Slfn9	schlafen 9 [Source:MGI Symbol;Acc:MGI:2445121]
ENSMUSG00000025758	1.28962	0.433152	7.45276	0.00633391	0.0687341	chr3	+	40799951	40816881	NM_011495	Plk4	polo-like kinase 4 [Source:MGI Symbol;Acc:MGI:101783]
ENSMUSG00000020185	1.28859	2.68295	7.21576	0.00722662	0.0730405	chr10	+	110745468	110787384	NM_178609	E2f7	E2F transcription factor 7 [Source:MGI Symbol;Acc:MGI:1289147]
ENSMUSG00000062151	1.28713	4.4371	12.6232	0.000380993	0.0142826	chr9	-	73933567	73480870	NM_001081153	Unc13c	unc-13 homolog C (C. elegans) [Source:MGI Symbol;Acc:MGI:2149021]
ENSMUSG00000022144	1.28596	2.77647	11.235	0.000802702	0.0222651	chr15	+	7811011	7837575	NM_001301333	Gdnf	glial cell line derived neurotrophic factor [Source:MGI Symbol;Acc:MGI:107430]
ENSMUSG00000026185	1.28568	8.64823	15.0582	0.000104246	0.00606929	chr1	-	72874884	72857932	NM_010518	Igfbp5	insulin-like growth factor binding protein 5 [Source:MGI Symbol;Acc:MGI:96440]
ENSMUSG00000052981	1.28327	1.60506	7.03822	0.00797884	0.0771408	chr13	-	69739897	69702835	NM_001145162	Ube2ql1	ubiquitin-conjugating enzyme E2Q family-like 1 [Source:MGI Symbol;Acc:MGI:1924230]
ENSMUSG00000047747	1.27989	2.27643	9.35257	0.00222673	0.0398652	chr8	+	82863356	83091271	NM_177378	Rnf150	ring finger protein 150 [Source:MGI Symbol;Acc:MGI:2443860]
ENSMUSG00000026896	1.27895	0.282673	8.10677	0.00441001	0.0578539	chr2	-	62646211	62595798	NM_027835	Ifih1	interferon induced with helicase C domain 1 [Source:MGI Symbol;Acc:MGI:1918836]
ENSMUSG00000028718	1.27856	3.11557	7.41786	0.00645797	0.0692227	chr4	+	115000159	115043196	NM_001304555	Stil	Scl/Tal1 interrupting locus [Source:MGI Symbol;Acc:MGI:107477]
ENSMUSG00000031861	1.27471	2.2016	11.1079	0.000859589	0.0230173	chr8	+	69822565	69831102	NM_020028	Lpar2	lysophosphatidic acid receptor 2 [Source:MGI Symbol;Acc:MGI:1858422]
ENSMUSG00000040035	1.27199	5.01739	11.0616	0.000881355	0.0233474	chr2	+	118779722	118795175	NM_170593	Disp2	dispatched homolog 2 (Drosophila) [Source:MGI Symbol;Acc:MGI:2388733]
ENSMUSG00000029378	1.26901	2.77943	8.11032	0.0044014	0.0578539	chr5	+	91139599	91148432	NM_009704	Areg	amphiregulin [Source:MGI Symbol;Acc:MGI:88068]
ENSMUSG00000030170	1.26467	0.311908	7.33441	0.0067647	0.0710408	chr6	-	119449386	119432531	NM_001271757	Wnt5b	wingless-type MMTV integration site family, member 5B [Source:MGI Symbol;Acc:MGI:98959]
ENSMUSG00000040717	1.25973	3.60519	10.865	0.00098001	0.0248947	chr14	+	27039001	27107286	NM_134437	Il17rd	interleukin 17 receptor D [Source:MGI Symbol;Acc:MGI:2159727]
ENSMUSG00000001985	1.25742	4.20629	7.91845	0.00489331	0.0604412	chr4	+	125490700	125714173	NM_001081097	Grik3	glutamate receptor, ionotropic, kainate 3 [Source:MGI Symbol;Acc:MGI:95816]
ENSMUSG00000024084	1.24982	2.18095	8.31385	0.0039344	0.054568	chr17	+	79051906	79090243	NM_027455	Qpct	glutaminyl-peptide cyclotransferase (glutaminyl cyclase) [Source:MGI Symbol;Acc:MGI:1917786]
ENSMUSG00000040274	1.24575	6.86509	17.7	2.58621e-05	0.00223734	chr5	+	3344312	3522225	NM_009873	Cdk6	cyclin-dependent kinase 6 [Source:MGI Symbol;Acc:MGI:1277162]
ENSMUSG00000017740	1.24264	0.397031	7.1754	0.00739099	0.0740956	chr2	+	164967983	164999731	NM_020333	Slc12a5	solute carrier family 12, member 5 [Source:MGI Symbol;Acc:MGI:1862037]
ENSMUSG00000030306	1.23947	4.74201	6.40346	0.0113898	0.0916002	chr6	-	148444389	148232430	NM_198967	Tmtc1	transmembrane and tetratricopeptide repeat containing 1 [Source:MGI Symbol;Acc:MGI:3039590]
ENSMUSG00000003746	1.23711	4.16244	10.8356	0.00099567	0.0250966	chr10	-	54075796	53904788	NM_008548	Man1a	mannosidase 1, alpha [Source:MGI Symbol;Acc:MGI:104677]
ENSMUSG00000033952	1.23566	4.89642	8.56228	0.00343198	0.0507253	chr1	+	139454775	139494091	NM_009791	Aspm	asp (abnormal spindle)-like, microcephaly associated (Drosophila) [Source:MGI Symbol;Acc:MGI:1334448]
ENSMUSG00000028078	1.22652	0.618915	9.53533	0.00201554	0.0380148	chr3	-	86920852	86786153	NM_027539	Dclk2	doublecortin-like kinase 2 [Source:MGI Symbol;Acc:MGI:1918012]
ENSMUSG00000036855	1.2242	3.64444	12.6018	0.000385382	0.0144035	chr18	-	9282809	9278607	NM_153086	Gjd4	gap junction protein, delta 4 [Source:MGI Symbol;Acc:MGI:2444990]
ENSMUSG00000068270	1.22248	3.15107	7.96532	0.0047682	0.0598032	chrX	+	6399854	6633837	NM_001040459	Shroom4	shroom family member 4 [Source:MGI Symbol;Acc:MGI:2685570]
ENSMUSG00000017861	1.21814	3.86182	7.1309	0.00757668	0.0753466	chr2	+	163054687	163084688	NM_008652	Mybl2	myeloblastosis oncogene-like 2 [Source:MGI Symbol;Acc:MGI:101785]
ENSMUSG00000037685	1.21741	4.31121	25.9509	3.50219e-07	0.000127428	chr5	-	67847370	67618140	NM_009727	Atp8a1	ATPase, aminophospholipid transporter (APLT), class I, type 8A, member 1 [Source:MGI Symbol;Acc:MGI:1330848]
ENSMUSG00000019256	1.21337	2.76451	9.25751	0.00234532	0.0413303	chr12	-	35535038	35497974	NM_013464	Ahr	aryl-hydrocarbon receptor [Source:MGI Symbol;Acc:MGI:105043]
ENSMUSG00000031004	1.21277	6.984	8.81985	0.00297971	0.0473804	chr7	-	135716379	135689788	NM_001081117	Mki67	antigen identified by monoclonal antibody Ki 67 [Source:MGI Symbol;Acc:MGI:106035]
ENSMUSG00000022421	1.20778	2.93946	16.1259	5.92666e-05	0.00407326	chr15	-	79804709	79786352	NM_030689	Nptxr	neuronal pentraxin receptor [Source:MGI Symbol;Acc:MGI:1920590]
ENSMUSG00000039716	1.20575	2.10538	6.81762	0.00902628	0.0820456	chr9	-	107231909	106892825	NM_153413	Dock3	dedicator of cyto-kinesis 3 [Source:MGI Symbol;Acc:MGI:2429763]
ENSMUSG00000056004	1.20275	0.972955	9.15605	0.00247896	0.0427901	chr5	+	9266132	9480717	NM_172706	9330182L06Rik	RIKEN cDNA 9330182L06 gene [Source:MGI Symbol;Acc:MGI:2443264]
ENSMUSG00000055639	1.20245	1.59487	6.12433	0.0133334	0.098476	chr14	-	98169543	97786853	NM_007826	Dach1	dachshund 1 (Drosophila) [Source:MGI Symbol;Acc:MGI:1277991]
ENSMUSG00000002227	1.19827	3.02404	7.16717	0.00742499	0.0743761	chr3	-	104818305	104794836	NM_001163441	Mov10	Moloney leukemia virus 10 [Source:MGI Symbol;Acc:MGI:97054]
ENSMUSG00000097056	1.19675	-0.130232	6.09844	0.0135302	0.0992093	chr16	+	11008898	11015186	NR_040518	Gm4262	predicted gene 4262 [Source:MGI Symbol;Acc:MGI:3782439]
ENSMUSG00000022895	1.1954	5.87699	14.0933	0.000173959	0.00878385	chr16	+	95702075	95721051	NM_011809	Ets2	E26 avian leukemia oncogene 2, 3' domain [Source:MGI Symbol;Acc:MGI:95456]
ENSMUSG00000042331	1.19486	4.91261	16.7727	4.21361e-05	0.00312135	chr11	+	62029253	62221129	NM_001281818	Specc1	sperm antigen with calponin homology and coiled-coil domains 1 [Source:MGI Symbol;Acc:MGI:2442356]
ENSMUSG00000021765	1.19474	6.0927	6.15707	0.0130888	0.0973086	chr13	-	114458730	114452262	NM_008046	Fst	follistatin [Source:MGI Symbol;Acc:MGI:95586]
ENSMUSG00000049907	1.18612	0.459139	8.24628	0.00408356	0.0555751	chr5	+	74195286	74199481	NM_026878	Rasl11b	RAS-like, family 11, member B [Source:MGI Symbol;Acc:MGI:1916189]
ENSMUSG00000047904	1.18457	-0.186621	6.59764	0.0102114	0.0867649	chr11	+	113619342	113626028	NM_001042606	Sstr2	somatostatin receptor 2 [Source:MGI Symbol;Acc:MGI:98328]
ENSMUSG00000022636	1.18421	6.92486	8.08199	0.00447074	0.0580716	chr16	-	52454074	52248996	NM_009655	Alcam	activated leukocyte cell adhesion molecule [Source:MGI Symbol;Acc:MGI:1313266]
ENSMUSG00000014602	1.18358	5.03292	10.1674	0.00142942	0.030861	chr1	-	93101822	93015464	NM_008440	Kif1a	kinesin family member 1A [Source:MGI Symbol;Acc:MGI:108391]
ENSMUSG00000041649	1.18212	2.28797	13.1415	0.000288828	0.0123637	chrX	+	153237748	153396132	NM_173780	Klf8	Kruppel-like factor 8 [Source:MGI Symbol;Acc:MGI:2442430]
ENSMUSG00000032369	1.18169	3.89216	11.1234	0.000852467	0.0229681	chr9	+	92249750	92272278	NM_011636	Plscr1	phospholipid scramblase 1 [Source:MGI Symbol;Acc:MGI:893575]
ENSMUSG00000041439	1.17509	2.91318	14.0029	0.000182528	0.00904871	chr1	-	52727462	52656286	NM_133829	Mfsd6	major facilitator superfamily domain containing 6 [Source:MGI Symbol;Acc:MGI:1922925]
ENSMUSG00000026605	1.17162	5.74707	10.1728	0.00142526	0.0308251	chr1	-	189688086	189640606	NM_001081363	Cenpf	centromere protein F [Source:MGI Symbol;Acc:MGI:1313302]
ENSMUSG00000035246	1.16862	0.413394	6.31013	0.012005	0.094211	chrX	+	93675102	93749951	NM_211138	Pcyt1b	phosphate cytidylyltransferase 1, choline, beta isoform [Source:MGI Symbol;Acc:MGI:2147987]
ENSMUSG00000079685	1.16576	4.08641	11.307	0.000772168	0.021772	chr10	-	7473477	7444873	NM_029975	Ulbp1	UL16 binding protein 1 [Source:MGI Symbol;Acc:MGI:1925027]
ENSMUSG00000036019	1.16298	2.69775	15.585	7.88767e-05	0.00503042	chr10	-	105574435	105187663	NM_177368	Tmtc2	transmembrane and tetratricopeptide repeat containing 2 [Source:MGI Symbol;Acc:MGI:1914057]
ENSMUSG00000035835	1.16224	2.52325	9.07061	0.00259751	0.0439857	chr10	-	79874570	79860475	NM_001170935	Lppr3	lipid phosphate phosphatase-related protein type 3 [Source:MGI Symbol;Acc:MGI:2388640]
ENSMUSG00000034488	1.16205	3.90289	13.0977	0.000295665	0.0125693	chr13	+	88821511	89323223	NM_001037987	Edil3	EGF-like repeats and discoidin I-like domains 3 [Source:MGI Symbol;Acc:MGI:1329025]
ENSMUSG00000031303	1.15707	0.594695	8.67584	0.00322457	0.0490063	chrX	+	159988433	160123351	NM_001163085	Map3k15	mitogen-activated protein kinase kinase kinase 15 [Source:MGI Symbol;Acc:MGI:2448588]
ENSMUSG00000040329	1.15591	0.489278	6.40529	0.0113781	0.0915797	chr3	-	7613727	7569994	NM_008371	Il7	interleukin 7 [Source:MGI Symbol;Acc:MGI:96561]
ENSMUSG00000031355	1.15403	4.58022	10.8472	0.000989474	0.0250323	chrX	+	168795099	169304435	NM_009707	Arhgap6	Rho GTPase activating protein 6 [Source:MGI Symbol;Acc:MGI:1196332]
ENSMUSG00000040594	1.14945	1.55384	12.0385	0.000521128	0.0172838	chr11	-	33513746	33211795	NM_023146	Ranbp17	RAN binding protein 17 [Source:MGI Symbol;Acc:MGI:1929706]
ENSMUSG00000050379	1.14383	3.65201	8.08085	0.00447354	0.0580716	chrX	-	36989656	36915031	NM_001177324	Sept6	septin 6 [Source:MGI Symbol;Acc:MGI:1888939]
ENSMUSG00000031016	1.14097	3.20082	13.827	0.00020044	0.00943781	chr7	+	110122350	110142112	NM_009516	Wee1	WEE 1 homolog 1 (S. pombe) [Source:MGI Symbol;Acc:MGI:103075]
ENSMUSG00000034981	1.13826	4.3011	10.8178	0.00100531	0.0252266	chr5	+	91517615	91626894	NM_145562	Parm1	prostate androgen-regulated mucin-like protein 1 [Source:MGI Symbol;Acc:MGI:2443349]
ENSMUSG00000020623	1.13787	1.54096	7.62817	0.00574636	0.0656401	chr11	+	110399122	110513641	NM_011943	Map2k6	mitogen-activated protein kinase kinase 6 [Source:MGI Symbol;Acc:MGI:1346870]
ENSMUSG00000048644	1.13668	3.43445	9.69319	0.00184952	0.0362032	chr8	-	4259274	4257648	NM_183315	Ctxn1	cortexin 1 [Source:MGI Symbol;Acc:MGI:88566]
ENSMUSG00000046733	1.13598	4.01847	7.0969	0.00772176	0.0759347	chr6	+	135065651	135084709	NM_181444	Gprc5a	G protein-coupled receptor, family C, group 5, member A [Source:MGI Symbol;Acc:MGI:1891250]
ENSMUSG00000026779	1.13595	4.00683	7.74407	0.00538892	0.0635523	chr2	-	23156024	23115606	NM_025979	Mastl	microtubule associated serine/threonine kinase-like [Source:MGI Symbol;Acc:MGI:1914371]
ENSMUSG00000040612	1.1337	3.32158	10.9801	0.000920944	0.0240359	chr1	+	166254139	166316823	NM_001164528	Ildr2	immunoglobulin-like domain containing receptor 2 [Source:MGI Symbol;Acc:MGI:1196370]
ENSMUSG00000061607	1.12993	4.21178	11.8982	0.000561883	0.0179151	chr17	+	35841515	35859670	NM_001010833	Mdc1	mediator of DNA damage checkpoint 1 [Source:MGI Symbol;Acc:MGI:3525201]
ENSMUSG00000044468	1.12847	2.8655	10.2879	0.00133902	0.0298527	chr3	-	100489324	100468057	NM_001142952	Fam46c	family with sequence similarity 46, member C [Source:MGI Symbol;Acc:MGI:1921895]
ENSMUSG00000045328	1.1282	5.45014	8.41987	0.00371143	0.0528865	chr3	+	135212537	135273611	NM_173762	Cenpe	centromere protein E [Source:MGI Symbol;Acc:MGI:1098230]
ENSMUSG00000062991	1.12704	0.929652	6.95588	0.00835441	0.078595	chr8	-	31918203	31818028	NM_178591	Nrg1	neuregulin 1 [Source:MGI Symbol;Acc:MGI:96083]
ENSMUSG00000031709	1.12672	4.04616	11.6149	0.000654264	0.0195749	chr8	+	83165352	83272422	NM_027758	Tbc1d9	TBC1 domain family, member 9 [Source:MGI Symbol;Acc:MGI:1918560]
ENSMUSG00000040711	1.12392	6.68329	17.767	2.49678e-05	0.00220626	chr11	+	32347820	32428173	NM_177364	Sh3pxd2b	SH3 and PX domains 2B [Source:MGI Symbol;Acc:MGI:2442062]
ENSMUSG00000042359	1.12277	3.85451	10.1809	0.00141902	0.0308251	chr2	+	76406538	76600647	NM_001290733	Osbpl6	oxysterol binding protein-like 6 [Source:MGI Symbol;Acc:MGI:2139014]
ENSMUSG00000053646	1.12213	5.39613	15.2392	9.47152e-05	0.00563328	chr9	+	109095389	109119917	NM_172775	Plxnb1	plexin B1 [Source:MGI Symbol;Acc:MGI:2154238]
ENSMUSG00000027533	1.12088	4.60079	7.67104	0.0056114	0.0648276	chr3	+	10012548	10016607	NM_010634	Fabp5	fatty acid binding protein 5, epidermal [Source:MGI Symbol;Acc:MGI:101790]
ENSMUSG00000031103	1.12025	3.71229	11.863	0.000572589	0.0180485	chrX	-	48463132	48411049	NM_019680	Elf4	E74-like factor 4 (ets domain transcription factor) [Source:MGI Symbol;Acc:MGI:1928377]
ENSMUSG00000024798	1.11978	1.29049	7.28531	0.00695207	0.0719879	chr19	-	36057340	35958734	NM_008315	Htr7	5-hydroxytryptamine (serotonin) receptor 7 [Source:MGI Symbol;Acc:MGI:99841]
ENSMUSG00000028532	1.11796	2.90762	7.83096	0.00513587	0.0618527	chr4	+	100776675	101004544	NM_198037	Cachd1	cache domain containing 1 [Source:MGI Symbol;Acc:MGI:2444177]
ENSMUSG00000026547	1.11532	6.25992	9.47222	0.00208607	0.0384046	chr1	+	172500047	172507380	NM_178598	Tagln2	transgelin 2 [Source:MGI Symbol;Acc:MGI:1312985]
ENSMUSG00000021662	1.11448	3.31474	11.8226	0.000585148	0.0182339	chr13	-	98206165	97898595	NM_012026	Arhgef28	Rho guanine nucleotide exchange factor (GEF) 28 [Source:MGI Symbol;Acc:MGI:1346016]
ENSMUSG00000020331	1.11407	0.35355	6.31784	0.0119529	0.0940229	chr10	+	79716634	79736108	NM_008226	Hcn2	hyperpolarization-activated, cyclic nucleotide-gated K+ 2 [Source:MGI Symbol;Acc:MGI:1298210]
ENSMUSG00000052397	1.11381	6.12965	9.60017	0.00194559	0.0374323	chr17	-	6782784	6738041	NM_009510	Ezr	ezrin [Source:MGI Symbol;Acc:MGI:98931]
ENSMUSG00000024056	1.11256	3.70373	7.50132	0.00616537	0.0679784	chr17	-	71526857	71496100	NM_023294	Ndc80	NDC80 homolog, kinetochore complex component (S. cerevisiae) [Source:MGI Symbol;Acc:MGI:1914302]
ENSMUSG00000043015	1.11122	1.80704	7.73164	0.00542615	0.0638181	chr1	+	52630703	52651919	NM_001142647	Tmem194b	transmembrane protein 194B [Source:MGI Symbol;Acc:MGI:2444113]
ENSMUSG00000009418	1.11089	4.21845	9.3589	0.00221905	0.0398059	chr1	-	135585705	135434580	NM_173437	Nav1	neuron navigator 1 [Source:MGI Symbol;Acc:MGI:2183683]
ENSMUSG00000044367	1.10812	3.07269	7.61839	0.00577759	0.0658752	chr11	-	70220994	70216789	NM_172371	Slc16a13	solute carrier family 16 (monocarboxylic acid transporters), member 13 [Source:MGI Symbol;Acc:MGI:1916559]
ENSMUSG00000038507	1.10431	2.34368	14.3581	0.000151126	0.00805853	chr6	-	39118349	39086410	NM_172893	Parp12	poly (ADP-ribose) polymerase family, member 12 [Source:MGI Symbol;Acc:MGI:2143990]
ENSMUSG00000027200	1.10403	5.56253	6.67945	0.00975307	0.0848814	chr2	+	124089969	124667769	NM_001290997	Sema6d	sema domain, transmembrane domain (TM), and cytoplasmic domain, (semaphorin) 6D [Source:MGI Symbol;Acc:MGI:2387661]
ENSMUSG00000040209	1.10288	6.21303	13.8488	0.000198124	0.00943265	chr3	-	9610085	9427020	NM_133218	Zfp704	zinc finger protein 704 [Source:MGI Symbol;Acc:MGI:2180715]
ENSMUSG00000068740	1.10085	1.63114	6.79632	0.00913461	0.0823773	chr3	-	108415552	108390851	NM_017392	Celsr2	cadherin, EGF LAG seven-pass G-type receptor 2 (flamingo homolog, Drosophila) [Source:MGI Symbol;Acc:MGI:1858235]
ENSMUSG00000004360	1.10022	3.07494	9.57319	0.00197439	0.0376932	chr10	+	29211643	29230779	NM_001162537	9330159F19Rik	RIKEN cDNA 9330159F19 gene [Source:MGI Symbol;Acc:MGI:3036239]
ENSMUSG00000042680	1.09759	2.73253	18.9417	1.34774e-05	0.00152963	chr18	-	21300138	21127201	NM_001033445	Garem	GRB2 associated, regulator of MAPK1 [Source:MGI Symbol;Acc:MGI:2685790]
ENSMUSG00000025582	1.09734	7.42702	8.92758	0.00280896	0.0457232	chr11	-	119547753	119538719	NM_008730	Nptx1	neuronal pentraxin 1 [Source:MGI Symbol;Acc:MGI:107811]
ENSMUSG00000062949	1.09405	4.56797	10.7485	0.00104364	0.0255156	chrX	-	60403981	60223293	NM_001001798	Atp11c	ATPase, class VI, type 11C [Source:MGI Symbol;Acc:MGI:1859661]
ENSMUSG00000017146	1.09394	4.72119	7.04434	0.00795163	0.0769847	chr11	-	101551879	101488764	NM_009764	Brca1	breast cancer 1 [Source:MGI Symbol;Acc:MGI:104537]
ENSMUSG00000050711	1.09325	1.60772	10.9361	0.000943073	0.0244074	chr1	-	79440120	79434669	NM_009129	Scg2	secretogranin II [Source:MGI Symbol;Acc:MGI:103033]
ENSMUSG00000027858	1.09201	3.08696	12.7708	0.000352067	0.0138267	chr3	+	102734529	102772292	NM_027533	Tspan2	tetraspanin 2 [Source:MGI Symbol;Acc:MGI:1917997]
ENSMUSG00000047139	1.09043	5.74349	12.7026	0.000365141	0.0141582	chr10	+	43579169	43584262	NM_009846	Cd24a	CD24a antigen [Source:MGI Symbol;Acc:MGI:88323]
ENSMUSG00000001517	1.09033	4.40283	8.24999	0.00407522	0.0555227	chr6	+	128362967	128375893	NM_008021	Foxm1	forkhead box M1 [Source:MGI Symbol;Acc:MGI:1347487]
ENSMUSG00000038168	1.09005	2.61516	10.5544	0.00115914	0.0268033	chr16	-	26105784	25959288	NM_173379	P3h2	prolyl 3-hydroxylase 2 [Source:MGI Symbol;Acc:MGI:2146663]
ENSMUSG00000034520	1.08877	4.16627	8.12144	0.00437448	0.0577343	chr11	-	102819179	102799579	NM_001159382	Gjc1	gap junction protein, gamma 1 [Source:MGI Symbol;Acc:MGI:95718]
ENSMUSG00000029826	1.08715	5.15207	12.3978	0.000429831	0.0152229	chr6	-	38354273	38310587	NM_028421	Zc3hav1	zinc finger CCCH type, antiviral 1 [Source:MGI Symbol;Acc:MGI:1926031]
ENSMUSG00000078920	1.08447	1.43982	7.19009	0.00733075	0.0737307	chr11	+	49076587	49096974	NM_001271677	Ifi47	interferon gamma inducible protein 47 [Source:MGI Symbol;Acc:MGI:99448]
ENSMUSG00000032254	1.08241	5.26784	7.44076	0.0063763	0.0689924	chr9	-	61946799	61917280	NM_024245	Kif23	kinesin family member 23 [Source:MGI Symbol;Acc:MGI:1919069]
ENSMUSG00000006575	1.08187	2.5262	6.93428	0.00845592	0.07889	chr11	+	102393403	102401754	NM_001252347	Rundc3a	RUN domain containing 3A [Source:MGI Symbol;Acc:MGI:1858752]
ENSMUSG00000078771	1.07593	4.83629	7.85544	0.00506682	0.0614959	chr11	-	79530588	79526560	NM_010161	Evi2a	ecotropic viral integration site 2a [Source:MGI Symbol;Acc:MGI:95458]
ENSMUSG00000022945	1.07565	3.85245	6.89779	0.00863023	0.079712	chr16	+	93883901	93906115	NM_028083	Chaf1b	chromatin assembly factor 1, subunit B (p60) [Source:MGI Symbol;Acc:MGI:1314881]
ENSMUSG00000020231	1.06918	5.48943	9.65593	0.00188741	0.0367157	chr10	-	76345260	76263051	NM_001081419	Dip2a	DIP2 disco-interacting protein 2 homolog A (Drosophila) [Source:MGI Symbol;Acc:MGI:2385920]
ENSMUSG00000024759	1.06839	5.01988	10.6348	0.00110978	0.0262005	chr19	+	7494040	7538608	NM_001163505	Atl3	atlastin GTPase 3 [Source:MGI Symbol;Acc:MGI:1924270]
ENSMUSG00000024867	1.06423	1.84865	8.10732	0.00440868	0.0578539	chr19	-	24555872	24294794	NM_008846	Pip5k1b	phosphatidylinositol-4-phosphate 5-kinase, type 1 beta [Source:MGI Symbol;Acc:MGI:107930]
ENSMUSG00000004872	1.06061	1.88277	7.83319	0.00512954	0.0618527	chr1	-	78196838	78101267	NM_001159520	Pax3	paired box 3 [Source:MGI Symbol;Acc:MGI:97487]
ENSMUSG00000017499	1.05914	3.74332	6.38606	0.011502	0.0920233	chr11	+	98907801	98923936	NM_001025779	Cdc6	cell division cycle 6 [Source:MGI Symbol;Acc:MGI:1345150]
ENSMUSG00000009681	1.05728	5.12645	11.0549	0.000884526	0.02335	chr10	+	75060896	75184923	NM_001081412	Bcr	breakpoint cluster region [Source:MGI Symbol;Acc:MGI:88141]
ENSMUSG00000030536	1.05661	7.76723	11.007	0.000907684	0.0237719	chr7	-	80803331	80711583	NM_016721	Iqgap1	IQ motif containing GTPase activating protein 1 [Source:MGI Symbol;Acc:MGI:1352757]
ENSMUSG00000089774	1.0542	7.46474	7.22438	0.00719198	0.0728682	chr16	+	92058322	92087473	NM_017391	Slc5a3	solute carrier family 5 (inositol transporters), member 3 [Source:MGI Symbol;Acc:MGI:1858226]
ENSMUSG00000025492	1.0535	5.51413	14.616	0.000131788	0.00721392	chr7	-	141010770	141009586	NM_025378	Ifitm3	interferon induced transmembrane protein 3 [Source:MGI Symbol;Acc:MGI:1913391]
ENSMUSG00000050107	1.05143	2.37194	6.81791	0.00902483	0.0820456	chr11	-	73138294	73135485	NM_010353	Gsg2	germ cell-specific gene 2 [Source:MGI Symbol;Acc:MGI:1194498]
ENSMUSG00000066392	1.05142	3.10718	8.42216	0.00370675	0.0528865	chr12	+	88794504	90334935	NM_001198587	Nrxn3	neurexin III [Source:MGI Symbol;Acc:MGI:1096389]
ENSMUSG00000028197	1.05089	2.68803	9.44002	0.00212301	0.0385664	chr3	+	145292472	145552011	NM_027770	Col24a1	collagen, type XXIV, alpha 1 [Source:MGI Symbol;Acc:MGI:1918605]
ENSMUSG00000035873	1.04953	1.20129	6.74167	0.00941863	0.0836157	chr10	+	108332189	108414391	NM_054056	Pawr	PRKC, apoptosis, WT1, regulator [Source:MGI Symbol;Acc:MGI:2149961]
ENSMUSG00000059493	1.04824	0.849786	6.58371	0.0102916	0.0870679	chrX	-	162159730	161833296	NM_001290526	Nhs	Nance-Horan syndrome (human) [Source:MGI Symbol;Acc:MGI:2684894]
ENSMUSG00000038481	1.04642	3.84218	15.1625	9.86416e-05	0.0057841	chr10	+	40349308	40483818	NM_001291817	Cdk19	cyclin-dependent kinase 19 [Source:MGI Symbol;Acc:MGI:1925584]
ENSMUSG00000036565	1.0428	4.09261	9.03879	0.0026431	0.0444868	chr5	-	140649025	140620578	NM_001308040	Ttyh3	tweety homolog 3 (Drosophila) [Source:MGI Symbol;Acc:MGI:1925589]
ENSMUSG00000038235	1.04155	2.37922	7.40351	0.00650969	0.0696638	chr1	+	171437535	171464603	NM_172647	F11r	F11 receptor [Source:MGI Symbol;Acc:MGI:1321398]
ENSMUSG00000071369	1.0372	1.70632	6.24861	0.0124291	0.0951577	chr10	+	19934472	20142753	NM_008580	Map3k5	mitogen-activated protein kinase kinase kinase 5 [Source:MGI Symbol;Acc:MGI:1346876]
ENSMUSG00000017724	1.03619	4.95141	7.10796	0.00767424	0.0756478	chr11	-	101785310	101769742	NM_008815	Etv4	ets variant 4 [Source:MGI Symbol;Acc:MGI:99423]
ENSMUSG00000043557	1.03464	1.8657	7.5089	0.0061395	0.0679784	chr17	-	29887882	29827958	NM_001081160	Mdga1	MAM domain containing glycosylphosphatidylinositol anchor 1 [Source:MGI Symbol;Acc:MGI:1922012]
ENSMUSG00000019775	1.03414	4.5743	6.2996	0.0120765	0.0942128	chr10	-	5922386	5825663	NM_019958	Rgs17	regulator of G-protein signaling 17 [Source:MGI Symbol;Acc:MGI:1927469]
ENSMUSG00000047749	1.03163	2.72962	10.2107	0.00139629	0.0305185	chr6	-	38299259	38287396	NM_172467	Zc3hav1l	zinc finger CCCH-type, antiviral 1-like [Source:MGI Symbol;Acc:MGI:2443387]
ENSMUSG00000031748	1.03075	2.16858	7.66457	0.00563157	0.0649532	chr8	+	93810838	93969388	NM_010308	Gnao1	guanine nucleotide binding protein, alpha O [Source:MGI Symbol;Acc:MGI:95775]
ENSMUSG00000028082	1.02839	4.57403	10.8016	0.00101415	0.0252524	chr3	+	86084434	86130522	NM_001082414	Sh3d19	SH3 domain protein D19 [Source:MGI Symbol;Acc:MGI:1350923]
ENSMUSG00000050822	1.02758	1.83334	7.05345	0.00791128	0.0768214	chr5	+	142702101	142722490	NM_146257	Slc29a4	solute carrier family 29 (nucleoside transporters), member 4 [Source:MGI Symbol;Acc:MGI:2385330]
ENSMUSG00000037679	1.02757	5.90634	10.3591	0.0012884	0.0288747	chr12	+	112588784	112615556	NM_198411	Inf2	inverted formin, FH2 and WH2 domain containing [Source:MGI Symbol;Acc:MGI:1917685]
ENSMUSG00000058587	1.02712	5.51483	11.6646	0.000637021	0.0192679	chr9	-	75559657	75497796	NM_016963	Tmod3	tropomodulin 3 [Source:MGI Symbol;Acc:MGI:1355315]
ENSMUSG00000028634	1.02627	1.09435	7.39036	0.00655745	0.0698409	chr4	+	119814495	120138045	NM_010657	Hivep3	human immunodeficiency virus type I enhancer binding protein 3 [Source:MGI Symbol;Acc:MGI:106589]
ENSMUSG00000025321	1.02535	4.97854	12.2692	0.000460491	0.0157368	chr12	-	119238802	119158022	NM_177290	Itgb8	integrin beta 8 [Source:MGI Symbol;Acc:MGI:1338035]
ENSMUSG00000047712	1.025	2.20685	8.25734	0.00405875	0.0554201	chr10	-	8518825	8204753	NM_177387	Ust	uronyl-2-sulfotransferase [Source:MGI Symbol;Acc:MGI:2442406]
ENSMUSG00000032815	1.02482	3.91356	6.11818	0.0133798	0.0986422	chr8	-	123318576	123268300	NM_016925	Fanca	Fanconi anemia, complementation group A [Source:MGI Symbol;Acc:MGI:1341823]
ENSMUSG00000035105	1.01944	5.08817	13.2136	0.000277931	0.0119801	chr12	-	54203860	54178981	NM_028133	Egln3	egl-9 family hypoxia-inducible factor 3 [Source:MGI Symbol;Acc:MGI:1932288]
ENSMUSG00000034522	1.01779	1.16926	8.86051	0.00291406	0.0467572	chr14	+	65358676	65398930	NM_199029	Zfp395	zinc finger protein 395 [Source:MGI Symbol;Acc:MGI:2682318]
ENSMUSG00000026158	1.01755	3.16553	12.4301	0.000422464	0.0151347	chr1	-	23383175	23366424	NM_001081079	Ogfrl1	opioid growth factor receptor-like 1 [Source:MGI Symbol;Acc:MGI:1917405]
ENSMUSG00000039202	1.01678	7.4109	15.4766	8.3535e-05	0.00516706	chr7	+	79273201	79365508	NM_018811	Abhd2	abhydrolase domain containing 2 [Source:MGI Symbol;Acc:MGI:1914344]
ENSMUSG00000007080	1.01603	5.42445	6.92217	0.00851337	0.0792071	chr5	+	110286306	110337474	NM_011132	Pole	polymerase (DNA directed), epsilon [Source:MGI Symbol;Acc:MGI:1196391]
ENSMUSG00000051220	1.01591	4.20499	6.64117	0.00996486	0.0858463	chrX	-	102157091	102141716	NM_146235	Ercc6l	excision repair cross-complementing rodent repair deficiency complementation group 6 like [Source:MGI Symbol;Acc:MGI:2654144]
ENSMUSG00000041147	1.01568	3.95848	8.84518	0.00293863	0.0469273	chr5	+	150522644	150569747	NM_009765	Brca2	breast cancer 2 [Source:MGI Symbol;Acc:MGI:109337]
ENSMUSG00000041219	1.01424	5.05511	11.0534	0.000885229	0.02335	chr2	-	113848656	113831546	NM_181416	Arhgap11a	Rho GTPase activating protein 11A [Source:MGI Symbol;Acc:MGI:2444300]
ENSMUSG00000038602	1.01407	5.29035	11.1635	0.000834237	0.0228326	chr10	+	52690533	53111622	NM_178675	Slc35f1	solute carrier family 35, member F1 [Source:MGI Symbol;Acc:MGI:2139810]
ENSMUSG00000028351	1.01227	3.24846	11.1107	0.000858311	0.0230173	chr4	-	68954397	68761514	NM_019967	Brinp1	bone morphogenic protein/retinoic acid inducible neural specific 1 [Source:MGI Symbol;Acc:MGI:1928478]
ENSMUSG00000041617	1.00886	1.24173	8.53476	0.00348426	0.0510709	chr16	+	17646475	17650738	NM_001166164	Ccdc74a	coiled-coil domain containing 74A [Source:MGI Symbol;Acc:MGI:1919565]
ENSMUSG00000027326	1.00762	4.59249	6.69389	0.00967441	0.084581	chr2	+	119047119	119104121	NM_029617	Casc5	cancer susceptibility candidate 5 [Source:MGI Symbol;Acc:MGI:1923714]
ENSMUSG00000025001	1.00752	4.70282	7.05379	0.00790978	0.0768214	chr19	+	38930915	38971051	NM_008234	Hells	helicase, lymphoid specific [Source:MGI Symbol;Acc:MGI:106209]
ENSMUSG00000028832	1.00589	6.41705	11.8246	0.000584523	0.0182339	chr4	+	134468320	134473843	NM_019641	Stmn1	stathmin 1 [Source:MGI Symbol;Acc:MGI:96739]
ENSMUSG00000015217	1.0047	4.94012	11.8644	0.000572169	0.0180485	chrX	+	71555918	71560676	NM_001293625	Hmgb3	high mobility group box 3 [Source:MGI Symbol;Acc:MGI:1098219]
ENSMUSG00000026039	1.00342	4.4967	6.31637	0.0119628	0.0940229	chr1	+	57995971	58025899	NM_199007	Sgol2a	shugoshin-like 2a (S. pombe) [Source:MGI Symbol;Acc:MGI:1098767]
ENSMUSG00000060260	1.00216	3.85451	6.77589	0.00923975	0.0826393	chr7	+	139248482	139267253	NM_001098636	Pwwp2b	PWWP domain containing 2B [Source:MGI Symbol;Acc:MGI:2142008]
ENSMUSG00000047534	1.00212	3.88164	6.46408	0.0110077	0.0898257	chr12	-	65172580	65132734	NM_172578	Mis18bp1	MIS18 binding protein 1 [Source:MGI Symbol;Acc:MGI:2145099]
ENSMUSG00000026029	1.00201	4.05198	7.77584	0.00529496	0.0629078	chr1	+	58795374	58847503	NM_009812	Casp8	caspase 8 [Source:MGI Symbol;Acc:MGI:1261423]
ENSMUSG00000049502	1.00167	0.631411	6.87694	0.00873148	0.0801909	chr16	-	35939151	35926511	NM_001013371	Dtx3l	deltex 3-like (Drosophila) [Source:MGI Symbol;Acc:MGI:2656973]
ENSMUSG00000026764	1.00146	3.52331	13.0586	0.000301892	0.012686	chr2	+	49619298	49774778	NM_008449	Kif5c	kinesin family member 5C [Source:MGI Symbol;Acc:MGI:1098269]
ENSMUSG00000047104	1.00115	2.07159	6.17495	0.0129572	0.0967882	chr6	-	135310347	135309784	NM_029595	Pbp2	phosphatidylethanolamine binding protein 2 [Source:MGI Symbol;Acc:MGI:1923650]
ENSMUSG00000033949	0.998746	0.55794	6.54335	0.0105277	0.0879434	chr18	-	46198818	46165302	NM_001170855	Trim36	tripartite motif-containing 36 [Source:MGI Symbol;Acc:MGI:106264]
ENSMUSG00000020828	0.995135	3.64838	9.54116	0.00200915	0.0380049	chr11	+	70540306	70558110	NM_008876	Pld2	phospholipase D2 [Source:MGI Symbol;Acc:MGI:892877]
ENSMUSG00000029999	0.995005	3.18041	10.2628	0.00135739	0.0300398	chr6	+	86195487	86275639	NM_031199	Tgfa	transforming growth factor alpha [Source:MGI Symbol;Acc:MGI:98724]
ENSMUSG00000032113	0.991686	3.26843	7.0376	0.00798159	0.0771408	chr9	-	36726658	36708482	NM_007691	Chek1	checkpoint kinase 1 [Source:MGI Symbol;Acc:MGI:1202065]
ENSMUSG00000025278	0.991401	8.59036	6.65583	0.00988317	0.08544	chr14	+	7817957	7951588	NM_001081427	Flnb	filamin, beta [Source:MGI Symbol;Acc:MGI:2446089]
ENSMUSG00000023186	0.989076	5.26128	11.5147	0.000690488	0.0202418	chr9	+	38718268	38743337	NM_172767	Vwa5a	von Willebrand factor A domain containing 5A [Source:MGI Symbol;Acc:MGI:1915026]
ENSMUSG00000002835	0.986536	4.52023	6.5031	0.0107687	0.0888883	chr17	+	56040416	56068026	NM_013733	Chaf1a	chromatin assembly factor 1, subunit A (p150) [Source:MGI Symbol;Acc:MGI:1351331]
ENSMUSG00000039046	0.986193	5.45672	18.59	1.62072e-05	0.00171367	chr2	+	6322667	6446390	NM_001080548	Usp6nl	USP6 N-terminal like [Source:MGI Symbol;Acc:MGI:2138893]
ENSMUSG00000021068	0.98465	5.67788	11.7437	0.000610503	0.0185388	chr12	-	70102833	70011435	NM_001081453	Nin	ninein [Source:MGI Symbol;Acc:MGI:105108]
ENSMUSG00000025352	0.983984	6.19766	8.74674	0.00310156	0.0485689	chr10	-	128891718	128882295	NM_010272	Gdf11	growth differentiation factor 11 [Source:MGI Symbol;Acc:MGI:1338027]
ENSMUSG00000041609	0.982683	3.54107	9.22679	0.00238499	0.0417322	chr5	-	115731621	115648175	NM_001080808	Ccdc64	coiled-coil domain containing 64 [Source:MGI Symbol;Acc:MGI:1922915]
ENSMUSG00000056758	0.981579	7.34462	6.2812	0.0122025	0.0944075	chr10	-	120476469	120361275	NM_010441	Hmga2	high mobility group AT-hook 2 [Source:MGI Symbol;Acc:MGI:101761]
ENSMUSG00000026355	0.978538	6.42172	6.30384	0.0120477	0.094211	chr1	-	128359664	128331590	NM_008567	Mcm6	minichromosome maintenance deficient 6 (MIS5 homolog, S. pombe) (S. cerevisiae) [Source:MGI Symbol;Acc:MGI:1298227]
ENSMUSG00000030254	0.976055	3.9995	7.22606	0.00718528	0.0728682	chr6	-	112696686	112619850	NM_021385	Rad18	RAD18 homolog (S. cerevisiae) [Source:MGI Symbol;Acc:MGI:1890476]
ENSMUSG00000095115	0.97204	6.83445	7.51734	0.0061108	0.0678606	chr7	-	118491975	118485114	NM_001033380	Itpripl2	inositol 1,4,5-triphosphate receptor interacting protein-like 2 [Source:MGI Symbol;Acc:MGI:2442416]
ENSMUSG00000035064	0.970601	3.64917	9.96231	0.00159777	0.0327795	chr7	+	120842831	120907219	NM_007908	Eef2k	eukaryotic elongation factor-2 kinase [Source:MGI Symbol;Acc:MGI:1195261]
ENSMUSG00000038010	0.970433	0.94721	6.92185	0.00851489	0.0792071	chr10	+	58497970	58576242	NM_001162956	Ccdc138	coiled-coil domain containing 138 [Source:MGI Symbol;Acc:MGI:1923388]
ENSMUSG00000073293	0.970373	1.10748	7.24469	0.00711109	0.0725836	chrX	-	6173015	6168696	NM_001031664	Nudt10	nudix (nucleoside diphosphate linked moiety X)-type motif 10 [Source:MGI Symbol;Acc:MGI:2147931]
ENSMUSG00000049866	0.970212	6.42595	7.69035	0.0055517	0.0644883	chr1	-	88702221	88698225	NM_177305	Arl4c	ADP-ribosylation factor-like 4C [Source:MGI Symbol;Acc:MGI:2445172]
ENSMUSG00000042289	0.97011	3.31865	7.7005	0.00552055	0.0641868	chr7	+	127800604	127803802	NM_133943	Hsd3b7	hydroxy-delta-5-steroid dehydrogenase, 3 beta- and steroid delta-isomerase 7 [Source:MGI Symbol;Acc:MGI:2141879]
ENSMUSG00000020387	0.963418	3.38427	7.24669	0.00710319	0.0725628	chr11	-	51857653	51813455	NM_199299	Jade2	jade family PHD finger 2 [Source:MGI Symbol;Acc:MGI:1924151]
ENSMUSG00000031971	0.963343	1.80906	10.0354	0.00153559	0.0319485	chr8	-	123860209	123840844	NM_028536	Ccsap	centriole, cilia and spindle associated protein [Source:MGI Symbol;Acc:MGI:1920670]
ENSMUSG00000037580	0.961374	2.79649	6.39217	0.0114625	0.0919006	chr14	-	47189413	47153895	NM_008102	Gch1	GTP cyclohydrolase 1 [Source:MGI Symbol;Acc:MGI:95675]
ENSMUSG00000029334	0.960728	6.70873	13.0375	0.000305315	0.0127174	chr5	-	99037351	98929773	NM_008926	Prkg2	protein kinase, cGMP-dependent, type II [Source:MGI Symbol;Acc:MGI:108173]
ENSMUSG00000025558	0.960112	3.84105	8.32581	0.00390858	0.0544516	chr14	-	121797734	121542039	NM_134074	Dock9	dedicator of cytokinesis 9 [Source:MGI Symbol;Acc:MGI:106321]
ENSMUSG00000038456	0.959119	4.54675	10.9387	0.000941766	0.0244074	chr6	-	39557867	39462378	NM_172477	Dennd2a	DENN/MADD domain containing 2A [Source:MGI Symbol;Acc:MGI:2444961]
ENSMUSG00000036777	0.957022	6.64338	6.44119	0.0111504	0.0905237	chr9	-	22389206	22331214	NM_028390	Anln	anillin, actin binding protein [Source:MGI Symbol;Acc:MGI:1920174]
ENSMUSG00000046532	0.95572	3.9993	8.3576	0.00384077	0.0539934	chrX	+	98149721	98323215	NM_013476	Ar	androgen receptor [Source:MGI Symbol;Acc:MGI:88064]
ENSMUSG00000036022	0.955649	2.14912	10.0606	0.00151477	0.0317466	chrX	-	53269020	53243425	NM_001166365	Fam122b	family with sequence similarity 122, member B [Source:MGI Symbol;Acc:MGI:1926005]
ENSMUSG00000018570	0.955173	1.07634	6.33175	0.0118595	0.0936336	chr11	-	69900957	69897363	NM_027419	2810408A11Rik	RIKEN cDNA 2810408A11 gene [Source:MGI Symbol;Acc:MGI:1917669]
ENSMUSG00000006715	0.954365	2.93357	6.71096	0.00958223	0.0843714	chr13	-	24761923	24751845	NM_020567	Gmnn	geminin [Source:MGI Symbol;Acc:MGI:1927344]
ENSMUSG00000041040	0.95428	4.82132	11.76	0.000605158	0.0184849	chr1	+	59913006	59985346	NM_001037725	Fam117b	family with sequence similarity 117, member B [Source:MGI Symbol;Acc:MGI:1920000]
ENSMUSG00000032359	0.953524	4.68768	8.31042	0.00394183	0.0546024	chr9	+	90054267	90076089	NM_007801	Ctsh	cathepsin H [Source:MGI Symbol;Acc:MGI:107285]
ENSMUSG00000035954	0.951511	2.88005	8.14366	0.0043212	0.0576051	chr12	+	40446053	40846486	NM_172803	Dock4	dedicator of cytokinesis 4 [Source:MGI Symbol;Acc:MGI:1918006]
ENSMUSG00000039621	0.950932	4.5537	8.90834	0.00283871	0.0460258	chr2	-	166713832	166566342	NM_177782	Prex1	phosphatidylinositol-3,4,5-trisphosphate-dependent Rac exchange factor 1 [Source:MGI Symbol;Acc:MGI:3040696]
ENSMUSG00000021948	0.950763	5.03456	8.96664	0.00274954	0.0453942	chr14	-	30626208	30595356	NM_011103	Prkcd	protein kinase C, delta [Source:MGI Symbol;Acc:MGI:97598]
ENSMUSG00000026980	0.949973	5.48044	11.5908	0.000662788	0.0197575	chr2	-	60383231	60293760	NM_013825	Ly75	lymphocyte antigen 75 [Source:MGI Symbol;Acc:MGI:106662]
ENSMUSG00000027330	0.948508	5.2409	6.98202	0.00823326	0.0778698	chr2	+	131186949	131198495	NM_023117	Cdc25b	cell division cycle 25B [Source:MGI Symbol;Acc:MGI:99701]
ENSMUSG00000059866	0.947823	3.90568	13.853	0.000197682	0.00943265	chr5	-	34513991	34496087	NM_139064	Tnip2	TNFAIP3 interacting protein 2 [Source:MGI Symbol;Acc:MGI:2386643]
ENSMUSG00000052062	0.947081	2.20368	7.79921	0.0052269	0.062369	chr1	+	61638824	62642284	NM_001081050	Pard3b	par-3 family cell polarity regulator beta [Source:MGI Symbol;Acc:MGI:1919301]
ENSMUSG00000021065	0.944038	4.79348	19.312	1.11005e-05	0.00134702	chr12	+	77238104	77475996	NM_001252614	Fut8	fucosyltransferase 8 [Source:MGI Symbol;Acc:MGI:1858901]
ENSMUSG00000044702	0.94152	2.15451	6.87094	0.00876088	0.0804012	chr7	-	122132844	122107262	NM_001289844	Palb2	partner and localizer of BRCA2 [Source:MGI Symbol;Acc:MGI:3040695]
ENSMUSG00000022723	0.939699	2.90116	6.774	0.00924951	0.0826393	chr16	-	59555752	59492088	NM_174848	Crybg3	beta-gamma crystallin domain containing 3 [Source:MGI Symbol;Acc:MGI:2676311]
ENSMUSG00000032076	0.937291	5.45784	18.9625	1.33314e-05	0.00152706	chr9	+	47530173	47853385	NM_207676	Cadm1	cell adhesion molecule 1 [Source:MGI Symbol;Acc:MGI:1889272]
ENSMUSG00000031628	0.936663	5.56559	12.9024	0.000328154	0.0131658	chr8	+	46617449	46638706	NM_009810	Casp3	transmembrane 6 superfamily member 1 [Source:MGI Symbol;Acc:MGI:1933209]
ENSMUSG00000034329	0.934429	3.57886	8.26713	0.00403692	0.0553053	chr11	-	86201193	86058138	NM_178309	Brip1	BRCA1 interacting protein C-terminal helicase 1 [Source:MGI Symbol;Acc:MGI:2442836]
ENSMUSG00000001435	0.932434	9.07722	11.4357	0.000720464	0.0207759	chr10	-	77166548	77052178	NM_009929	Col18a1	collagen, type XVIII, alpha 1 [Source:MGI Symbol;Acc:MGI:88451]
ENSMUSG00000026955	0.930408	1.83587	6.08741	0.0136149	0.0996035	chr2	+	25372330	25376803	NM_001290407	Sapcd2	suppressor APC domain containing 2 [Source:MGI Symbol;Acc:MGI:1919330]
ENSMUSG00000025867	0.92442	4.2549	8.26041	0.00405191	0.0554201	chr13	+	54371349	54383917	NM_009946	Cplx2	complexin 2 [Source:MGI Symbol;Acc:MGI:104726]
ENSMUSG00000034751	0.92355	6.88139	12.9377	0.000322035	0.0131481	chr13	-	103334460	102732491	NM_175171	Mast4	microtubule associated serine/threonine kinase family member 4 [Source:MGI Symbol;Acc:MGI:1918885]
ENSMUSG00000046179	0.923366	5.11552	9.51534	0.00203762	0.0381676	chr7	-	48881041	48866429	NM_001013368	E2f8	E2F transcription factor 8 [Source:MGI Symbol;Acc:MGI:1922038]
ENSMUSG00000025665	0.923018	2.89658	7.01228	0.00809526	0.0775127	chrX	-	111486782	111388193	NM_025949	Rps6ka6	ribosomal protein S6 kinase polypeptide 6 [Source:MGI Symbol;Acc:MGI:1914321]
ENSMUSG00000000567	0.922114	4.57346	9.46397	0.00209547	0.0384046	chr11	+	112782224	112787760	NM_011448	Sox9	SRY (sex determining region Y)-box 9 [Source:MGI Symbol;Acc:MGI:98371]
ENSMUSG00000001504	0.920844	3.27189	7.59302	0.00585946	0.0661986	chr13	+	72628820	72634198	NM_010574	Irx2	Iroquois related homeobox 2 (Drosophila) [Source:MGI Symbol;Acc:MGI:1197526]
ENSMUSG00000032688	0.919835	2.40843	7.06411	0.00786434	0.0765702	chr18	+	65430963	65478823	NM_172833	Malt1	mucosa associated lymphoid tissue lymphoma translocation gene 1 [Source:MGI Symbol;Acc:MGI:2445027]
ENSMUSG00000026475	0.91859	5.52033	7.3382	0.00675042	0.0709511	chr1	+	153740349	153745468	NM_011267	Rgs16	regulator of G-protein signaling 16 [Source:MGI Symbol;Acc:MGI:108407]
ENSMUSG00000028358	0.915842	2.85214	6.82627	0.00898269	0.0818901	chr4	+	62965574	63134030	NM_028326	Zfp618	zinc finger protein 618 [Source:MGI Symbol;Acc:MGI:1919950]
ENSMUSG00000031290	0.915091	2.46679	7.00076	0.00814753	0.0776464	chrX	-	147554050	147470387	NM_001081173	Lrch2	leucine-rich repeats and calponin homology (CH) domain containing 2 [Source:MGI Symbol;Acc:MGI:2147870]
ENSMUSG00000078185	0.913871	6.3488	9.37052	0.00220503	0.0397066	chr1	-	175688353	175682237	NM_021350	Chml	choroideremia-like [Source:MGI Symbol;Acc:MGI:101913]
ENSMUSG00000019564	0.91339	3.00085	7.50174	0.00616394	0.0679784	chr10	+	79927043	79955018	NM_007880	Arid3a	AT rich interactive domain 3A (BRIGHT-like) [Source:MGI Symbol;Acc:MGI:1328360]
ENSMUSG00000024789	0.913086	5.59308	8.67805	0.00322066	0.0490063	chr19	+	29251828	29313080	NM_008413	Jak2	Janus kinase 2 [Source:MGI Symbol;Acc:MGI:96629]
ENSMUSG00000026566	0.912892	3.60609	7.48195	0.00623207	0.0683063	chr1	-	165634521	165592240	NM_001001880	Mpzl1	myelin protein zero-like 1 [Source:MGI Symbol;Acc:MGI:1915731]
ENSMUSG00000040225	0.912154	8.39313	10.6801	0.00108294	0.025913	chr1	-	162740556	162670727	NM_001081290	Prrc2c	proline-rich coiled-coil 2C [Source:MGI Symbol;Acc:MGI:1913754]
ENSMUSG00000026274	0.911485	3.63043	6.51414	0.010702	0.0887364	chr1	-	93342789	93308778	NM_080850	Pask	PAS domain containing serine/threonine kinase [Source:MGI Symbol;Acc:MGI:2155936]
ENSMUSG00000090115	0.911247	2.5149	7.62095	0.00576941	0.0658426	chr17	+	47630690	47686738	NM_198421	Usp49	ubiquitin specific peptidase 49 [Source:MGI Symbol;Acc:MGI:2685391]
ENSMUSG00000024818	0.910199	2.17881	7.8278	0.00514485	0.0618532	chr19	+	5877817	5885766	NM_134154	Slc25a45	solute carrier family 25, member 45 [Source:MGI Symbol;Acc:MGI:2147731]
ENSMUSG00000021614	0.906311	6.3178	8.31377	0.00393457	0.054568	chr13	-	89742322	89656340	NM_019389	Vcan	versican [Source:MGI Symbol;Acc:MGI:102889]
ENSMUSG00000050954	0.905553	1.98989	10.4315	0.00123884	0.0281205	chr13	-	48513436	48487647	NM_001164576	Zfp169	zinc finger protein 169 [Source:MGI Symbol;Acc:MGI:1915161]
ENSMUSG00000027894	0.90405	2.96357	7.60035	0.00583569	0.0661808	chr3	-	107518018	107467543	NM_001293689	Slc6a17	solute carrier family 6 (neurotransmitter transporter), member 17 [Source:MGI Symbol;Acc:MGI:2442535]
ENSMUSG00000032501	0.902972	4.5872	9.90748	0.00164608	0.0333285	chr15	+	59648350	59656550	NM_144549	Trib1	tribbles homolog 1 (Drosophila) [Source:MGI Symbol;Acc:MGI:2443397]
ENSMUSG00000027379	0.900723	4.86986	6.3445	0.0117746	0.0933738	chr2	-	127831865	127801122	NM_009772	Bub1	budding uninhibited by benzimidazoles 1 homolog (S. cerevisiae) [Source:MGI Symbol;Acc:MGI:1100510]
ENSMUSG00000015961	0.899238	6.39359	9.5228	0.00202935	0.0381503	chr1	-	177796511	177762962	NM_007422	Adss	adenylosuccinate synthetase, non muscle [Source:MGI Symbol;Acc:MGI:87948]
ENSMUSG00000049537	0.898401	3.5901	6.91251	0.00855948	0.0793773	chr5	-	83355195	83278145	NM_153801	Tecrl	trans-2,3-enoyl-CoA reductase-like [Source:MGI Symbol;Acc:MGI:2444966]
ENSMUSG00000048503	0.897603	1.98849	8.17816	0.00423977	0.0569492	chr9	-	43116570	43108653	NM_001034863	Tmem136	transmembrane protein 136 [Source:MGI Symbol;Acc:MGI:2685030]
ENSMUSG00000016984	0.89728	3.06688	7.1188	0.00762797	0.0754341	chr11	-	17953875	17938756	NM_026576	Etaa1	Ewing tumor-associated antigen 1 [Source:MGI Symbol;Acc:MGI:1915395]
ENSMUSG00000063455	0.89471	3.19213	8.02588	0.00461136	0.058933	chr6	-	38254009	38123176	NM_194061	D630045J12Rik	RIKEN cDNA D630045J12 gene [Source:MGI Symbol;Acc:MGI:2669829]
ENSMUSG00000039043	0.893901	4.43055	7.04476	0.00794973	0.0769847	chr7	-	79935359	79925361	NM_027420	2610034B18Rik	RIKEN cDNA 2610034B18 gene [Source:MGI Symbol;Acc:MGI:1917670]
ENSMUSG00000038241	0.893769	6.03955	6.22069	0.0126266	0.0955375	chr2	+	155956558	155998900	NM_001130000	Cep250	centrosomal protein 250 [Source:MGI Symbol;Acc:MGI:108084]
ENSMUSG00000028076	0.89375	2.72325	8.88237	0.00287937	0.0465022	chr3	-	86999441	86995834	NM_007639	Cd1d1	CD1d1 antigen [Source:MGI Symbol;Acc:MGI:107674]
ENSMUSG00000042644	0.893108	5.91891	8.72921	0.00313152	0.0486155	chr17	+	27057304	27122223	NM_080553	Itpr3	inositol 1,4,5-triphosphate receptor 3 [Source:MGI Symbol;Acc:MGI:96624]
ENSMUSG00000019899	0.891859	7.32594	10.7796	0.00102626	0.0253887	chr10	-	27616843	26981285	NM_008481	Lama2	laminin, alpha 2 [Source:MGI Symbol;Acc:MGI:99912]
ENSMUSG00000064368	0.891545	3.40334	6.93566	0.00844937	0.07889	chrM	-	14070	13552	17722	mt-Nd6	mitochondrially encoded NADH dehydrogenase 6 [Source:MGI Symbol;Acc:MGI:102495]
ENSMUSG00000009376	0.89122	7.87696	8.1099	0.00440242	0.0578539	chr6	+	17463800	17573980	NM_008591	Met	met proto-oncogene [Source:MGI Symbol;Acc:MGI:96969]
ENSMUSG00000037474	0.886386	4.69122	7.56168	0.00596224	0.0668578	chr1	-	191575521	191537356	NM_001305233	Dtl	denticleless homolog (Drosophila) [Source:MGI Symbol;Acc:MGI:1924093]
ENSMUSG00000058806	0.8854	2.95692	7.44716	0.00635367	0.0688881	chr10	-	61979073	61838236	NM_001304757	Col13a1	collagen, type XIII, alpha 1 [Source:MGI Symbol;Acc:MGI:1277201]
ENSMUSG00000025986	0.885149	5.86349	9.08646	0.00257509	0.0438165	chr1	-	46854046	46807544	NM_172653	Slc39a10	solute carrier family 39 (zinc transporter), member 10 [Source:MGI Symbol;Acc:MGI:1914515]
ENSMUSG00000053199	0.884565	3.59703	7.2391	0.00713328	0.0726613	chr9	+	51765352	51853856	NM_175535	Arhgap20	Rho GTPase activating protein 20 [Source:MGI Symbol;Acc:MGI:2445175]
ENSMUSG00000031732	0.883567	3.29009	9.00629	0.00269053	0.0450398	chr8	+	109868603	109944670	NM_001122594	Phlpp2	PH domain and leucine rich repeat protein phosphatase 2 [Source:MGI Symbol;Acc:MGI:2444928]
ENSMUSG00000023008	0.883358	5.88824	8.34409	0.00386944	0.0542498	chr15	-	99370482	99317225	NM_011711	Fmnl3	formin-like 3 [Source:MGI Symbol;Acc:MGI:109569]
ENSMUSG00000037172	0.882666	3.46335	8.20015	0.00418869	0.0565085	chr6	-	40436133	40407500	NM_175528	E330009J07Rik	RIKEN cDNA E330009J07 gene [Source:MGI Symbol;Acc:MGI:2444256]
ENSMUSG00000002297	0.882015	5.00123	8.52717	0.00349883	0.0511883	chr5	-	8422680	8396973	NM_001190717	Dbf4	DBF4 homolog (S. cerevisiae) [Source:MGI Symbol;Acc:MGI:1351328]
ENSMUSG00000022360	0.880786	6.06205	6.55738	0.010445	0.0879332	chr15	-	58135082	58094047	NM_027435	Atad2	ATPase family, AAA domain containing 2 [Source:MGI Symbol;Acc:MGI:1917722]
ENSMUSG00000021360	0.878268	4.56345	7.24788	0.00709848	0.0725628	chr13	+	40859768	40960891	NM_023887	Gcnt2	glucosaminyl (N-acetyl) transferase 2, I-branching enzyme [Source:MGI Symbol;Acc:MGI:1100870]
ENSMUSG00000004530	0.87581	7.24921	8.45861	0.0036332	0.0523398	chr5	-	113908758	113842436	NM_011779	Coro1c	coronin, actin binding protein 1C [Source:MGI Symbol;Acc:MGI:1345964]
ENSMUSG00000031647	0.87571	7.32545	15.1623	9.86538e-05	0.0057841	chr8	+	60632860	60676729	NM_027756	Mfap3l	microfibrillar-associated protein 3-like [Source:MGI Symbol;Acc:MGI:1918556]
ENSMUSG00000036053	0.874489	3.87478	8.4889	0.00357319	0.051716	chr2	+	52857868	53134202	NM_172409	Fmnl2	formin-like 2 [Source:MGI Symbol;Acc:MGI:1918659]
ENSMUSG00000006678	0.873715	4.93188	6.79787	0.00912667	0.0823773	chrX	-	93632155	93304767	NM_008892	Pola1	polymerase (DNA directed), alpha 1 [Source:MGI Symbol;Acc:MGI:99660]
ENSMUSG00000024855	0.87325	4.78406	18.408	1.78304e-05	0.00179165	chr19	-	5273119	5133688	NM_153129	Pacs1	phosphofurin acidic cluster sorting protein 1 [Source:MGI Symbol;Acc:MGI:1277113]
ENSMUSG00000036030	0.872887	3.10998	6.23096	0.0125536	0.0954912	chr9	+	72806874	72917291	NM_175485	Prtg	protogenin homolog (Gallus gallus) [Source:MGI Symbol;Acc:MGI:2444710]
ENSMUSG00000027765	0.872511	2.60811	7.10848	0.00767201	0.0756478	chr3	+	61002795	61008979	NM_008772	P2ry1	purinergic receptor P2Y, G-protein coupled 1 [Source:MGI Symbol;Acc:MGI:105049]
ENSMUSG00000064367	0.872429	6.75908	8.59136	0.00337761	0.0502906	chrM	+	11742	13565	17721	mt-Nd5	mitochondrially encoded NADH dehydrogenase 5 [Source:MGI Symbol;Acc:MGI:102496]
ENSMUSG00000064345	0.872352	6.67566	6.62372	0.0100629	0.0860928	chrM	+	3914	4951	17717	mt-Nd2	mitochondrially encoded NADH dehydrogenase 2 [Source:MGI Symbol;Acc:MGI:102500]
ENSMUSG00000025932	0.871898	3.95775	9.59496	0.00195112	0.0374803	chr1	-	14310235	14168958	NM_010164	Eya1	eyes absent 1 homolog (Drosophila) [Source:MGI Symbol;Acc:MGI:109344]
ENSMUSG00000012443	0.871798	5.5478	6.30769	0.0120216	0.094211	chr19	+	37376403	37421859	NM_010615	Kif11	kinesin family member 11 [Source:MGI Symbol;Acc:MGI:1098231]
ENSMUSG00000044447	0.870918	4.83503	9.12702	0.00251861	0.0432146	chr14	-	67933572	67751928	NM_177780	Dock5	dedicator of cytokinesis 5 [Source:MGI Symbol;Acc:MGI:2652871]
ENSMUSG00000017550	0.870515	3.88127	9.93797	0.00161904	0.0329427	chr11	+	80089400	80135791	NM_001029856	Atad5	ATPase family, AAA domain containing 5 [Source:MGI Symbol;Acc:MGI:2442925]
ENSMUSG00000023915	0.869866	3.72554	8.98	0.00272951	0.0451768	chr17	+	43016555	43089188	NM_178589	Tnfrsf21	tumor necrosis factor receptor superfamily, member 21 [Source:MGI Symbol;Acc:MGI:2151075]
ENSMUSG00000022885	0.867842	4.87799	7.60252	0.00582869	0.0661808	chr16	+	23224740	23360348	NM_145933	St6gal1	beta galactoside alpha 2,6 sialyltransferase 1 [Source:MGI Symbol;Acc:MGI:108470]
ENSMUSG00000063810	0.865464	4.47666	8.78845	0.00303143	0.0477123	chr6	+	85587531	85702753	NM_145223	Alms1	Alstrom syndrome 1 [Source:MGI Symbol;Acc:MGI:1934606]
ENSMUSG00000057706	0.864745	5.57756	6.24187	0.0124765	0.0952564	chr7	+	82867333	82871563	NM_175366	Mex3b	mex3 homolog B (C. elegans) [Source:MGI Symbol;Acc:MGI:1918252]
ENSMUSG00000102543	0.864165	3.00324	6.93118	0.00847058	0.0789673	chr18	+	37819513	37841873	NM_033583	Pcdhgc5	protocadherin gamma subfamily C, 5 [Source:MGI Symbol;Acc:MGI:1935205]
ENSMUSG00000062995	0.862809	3.34927	8.3211	0.00391871	0.0545313	chr6	-	8778484	8630527	NM_001252266	Ica1	islet cell autoantigen 1 [Source:MGI Symbol;Acc:MGI:96391]
ENSMUSG00000022865	0.862004	6.22407	10.2527	0.00136483	0.0301506	chr16	+	78301496	78340752	NM_001025192	Cxadr	coxsackie virus and adenovirus receptor [Source:MGI Symbol;Acc:MGI:1201679]
ENSMUSG00000064363	0.860369	5.9293	6.55275	0.0104722	0.0879434	chrM	+	10167	11544	17719	mt-Nd4	mitochondrially encoded NADH dehydrogenase 4 [Source:MGI Symbol;Acc:MGI:102498]
ENSMUSG00000059456	0.858384	5.39501	7.9261	0.00487267	0.0603402	chr14	-	66281052	66153262	NM_172498	Ptk2b	PTK2 protein tyrosine kinase 2 beta [Source:MGI Symbol;Acc:MGI:104908]
ENSMUSG00000020019	0.85606	6.18519	6.15936	0.0130718	0.097241	chr10	+	93641049	93747207	NM_021320	Ntn4	netrin 4 [Source:MGI Symbol;Acc:MGI:1888978]
ENSMUSG00000034342	0.854821	4.26313	12.5119	0.000404374	0.0148442	chr9	-	44234046	44149262	NM_007619	Cbl	Casitas B-lineage lymphoma [Source:MGI Symbol;Acc:MGI:88279]
ENSMUSG00000034295	0.853973	6.36039	6.59339	0.0102358	0.0867904	chr18	+	24709445	25133500	NM_001289655	Fhod3	formin homology 2 domain containing 3 [Source:MGI Symbol;Acc:MGI:1925847]
ENSMUSG00000025931	0.850506	4.26208	10.8084	0.00101039	0.0252516	chr1	+	20890606	20939650	NM_028829	Paqr8	progestin and adipoQ receptor family member VIII [Source:MGI Symbol;Acc:MGI:1921479]
ENSMUSG00000024308	0.849212	4.22633	12.529	0.000400685	0.0147526	chr17	+	33919332	33929288	NM_001025313	Tapbp	TAP binding protein [Source:MGI Symbol;Acc:MGI:1201689]
ENSMUSG00000025880	0.848735	4.29098	6.72528	0.00950557	0.0840554	chr18	+	75367529	75395935	NM_001042660	Smad7	SMAD family member 7 [Source:MGI Symbol;Acc:MGI:1100518]
ENSMUSG00000074825	0.848717	4.11605	6.14835	0.0131535	0.0976134	chr2	-	127143306	127140409	NM_001163527	Itpripl1	inositol 1,4,5-triphosphate receptor interacting protein-like 1 [Source:MGI Symbol;Acc:MGI:1920588]
ENSMUSG00000048216	0.84693	1.57649	6.29912	0.0120798	0.0942128	chr6	-	13839942	13834458	NM_145066	Gpr85	G protein-coupled receptor 85 [Source:MGI Symbol;Acc:MGI:1927851]
ENSMUSG00000005968	0.84687	3.02423	7.8762	0.00500897	0.0611972	chr3	-	94658871	94612757	NM_011656	Tuft1	tuftelin 1 [Source:MGI Symbol;Acc:MGI:109572]
ENSMUSG00000046879	0.844505	2.98267	6.38622	0.011501	0.0920233	chr11	-	48871374	48865245	NM_008326	Irgm1	immunity-related GTPase family M member 1 [Source:MGI Symbol;Acc:MGI:107567]
ENSMUSG00000022438	0.844479	5.49998	11.5283	0.000685453	0.0201419	chr15	+	84232043	84315688	NM_133167	Parvb	parvin, beta [Source:MGI Symbol;Acc:MGI:2153063]
ENSMUSG00000052632	0.840837	3.7063	6.27204	0.0122658	0.094601	chr12	+	21111748	21270171	NM_001135192	Asap2	ArfGAP with SH3 domain, ankyrin repeat and PH domain 2 [Source:MGI Symbol;Acc:MGI:2685438]
ENSMUSG00000041734	0.840353	6.14024	7.36086	0.00666591	0.070482	chr3	-	87174747	87078601	NM_130867	Kirrel	kin of IRRE like (Drosophila) [Source:MGI Symbol;Acc:MGI:1891396]
ENSMUSG00000025255	0.839765	5.23837	8.60448	0.00335338	0.0501022	chr3	+	5218554	5415855	NM_030708	Zfhx4	zinc finger homeodomain 4 [Source:MGI Symbol;Acc:MGI:2137668]
ENSMUSG00000029223	0.839702	3.98902	8.03721	0.0045826	0.058933	chr5	+	66676091	66687234	NM_011670	Uchl1	ubiquitin carboxy-terminal hydrolase L1 [Source:MGI Symbol;Acc:MGI:103149]	Overexpression of ubiquitin carboxyl-terminal hydrolase L1 (UCHL1) delays Alzheimer's progression in vivo
ENSMUSG00000075284	0.837892	4.84637	8.08486	0.00446366	0.0580651	chr2	-	73529734	73429610	NM_153138	Wipf1	WAS/WASL interacting protein family, member 1 [Source:MGI Symbol;Acc:MGI:2178801]
ENSMUSG00000016526	0.830712	3.23602	7.96658	0.00476488	0.0598032	chr1	-	131138340	131127455	NM_145508	Dyrk3	dual-specificity tyrosine-(Y)-phosphorylation regulated kinase 3 [Source:MGI Symbol;Acc:MGI:1330300]
ENSMUSG00000022656	0.83071	5.60376	15.3148	9.09986e-05	0.00546478	chr16	-	46496967	46387706	NM_021496	Pvrl3	poliovirus receptor-related 3 [Source:MGI Symbol;Acc:MGI:1930171]
ENSMUSG00000044167	0.828742	4.80133	16.4787	4.92003e-05	0.0035594	chr3	+	52268336	52353221	NM_019739	Foxo1	forkhead box O1 [Source:MGI Symbol;Acc:MGI:1890077]
ENSMUSG00000032419	0.823837	4.44854	6.20016	0.0127739	0.0958312	chr9	-	87731260	87702800	NM_023814	Tbx18	T-box18 [Source:MGI Symbol;Acc:MGI:1923615]
ENSMUSG00000045817	0.823106	6.55023	7.67074	0.00561235	0.0648276	chr17	-	84187947	84183931	NM_001001806	Zfp36l2	zinc finger protein 36, C3H type-like 2 [Source:MGI Symbol;Acc:MGI:107945]
ENSMUSG00000047045	0.821734	4.89817	9.34398	0.0022372	0.039937	chrX	+	142681406	142843494	NM_001199357	Tmem164	transmembrane protein 164 [Source:MGI Symbol;Acc:MGI:2148020]
ENSMUSG00000022377	0.820268	5.53547	10.1218	0.00146528	0.0310952	chr15	-	64312673	64086857	NM_001276462	Asap1	ArfGAP with SH3 domain, ankyrin repeat and PH domain1 [Source:MGI Symbol;Acc:MGI:1342335]
ENSMUSG00000096188	0.818716	5.19958	10.5726	0.00114775	0.0266394	chr8	-	104395807	104348191	NM_153582	Cmtm4	CKLF-like MARVEL transmembrane domain containing 4 [Source:MGI Symbol;Acc:MGI:2142888]
ENSMUSG00000014778	0.817711	3.71993	6.52859	0.0106154	0.0883264	chr8	-	105347953	105329163	NM_177699	Fhod1	formin homology 2 domain containing 1 [Source:MGI Symbol;Acc:MGI:2679008]
ENSMUSG00000027381	0.817174	3.89755	10.7683	0.00103256	0.0254451	chr2	+	128126039	128162547	NM_207680	Bcl2l11	BCL2-like 11 (apoptosis facilitator) [Source:MGI Symbol;Acc:MGI:1197519]
ENSMUSG00000039787	0.815258	2.56232	6.52047	0.010664	0.0886588	chr2	+	29869494	29882840	NM_207298	Cercam	cerebral endothelial cell adhesion molecule [Source:MGI Symbol;Acc:MGI:2139134]
ENSMUSG00000021707	0.815225	4.02266	6.51285	0.0107098	0.0887414	chr13	+	92354783	92389053	NM_010049	Dhfr	dihydrofolate reductase [Source:MGI Symbol;Acc:MGI:94890]
ENSMUSG00000074802	0.813917	3.83413	6.94427	0.00840882	0.0787476	chr10	-	89443967	89408823	NM_001079876	Gas2l3	growth arrest-specific 2 like 3 [Source:MGI Symbol;Acc:MGI:1918780]
ENSMUSG00000075028	0.812854	2.16836	6.98474	0.00822074	0.0778698	chr2	-	93046144	92974906	NM_001177536	Prdm11	PR domain containing 11 [Source:MGI Symbol;Acc:MGI:2685553]
ENSMUSG00000000838	0.81182	5.70913	8.71112	0.00316274	0.0486468	chrX	+	68678541	68717963	NM_008031	Fmr1	fragile X mental retardation syndrome 1 [Source:MGI Symbol;Acc:MGI:95564]
ENSMUSG00000020900	0.810868	6.78339	8.20817	0.00417021	0.0563206	chr11	+	68691915	68816632	NM_175260	Myh10	myosin, heavy polypeptide 10, non-muscle [Source:MGI Symbol;Acc:MGI:1930780]
ENSMUSG00000024098	0.809752	6.20425	12.16	0.000488242	0.0163687	chr17	-	65951187	65923066	NM_023053	Twsg1	twisted gastrulation homolog 1 (Drosophila) [Source:MGI Symbol;Acc:MGI:2137520]
ENSMUSG00000021215	0.809345	6.86292	22.0799	2.61531e-06	0.000511343	chr13	-	3918220	3882565	NM_019671	Net1	neuroepithelial cell transforming gene 1 [Source:MGI Symbol;Acc:MGI:1927138]
ENSMUSG00000032802	0.80862	6.6152	6.40846	0.0113578	0.091476	chr2	+	152105524	152111376	NM_029688	Srxn1	sulfiredoxin 1 homolog (S. cerevisiae) [Source:MGI Symbol;Acc:MGI:104971]
ENSMUSG00000022246	0.808399	6.23944	7.26713	0.00702277	0.0721645	chr15	-	10713540	10568979	NM_030690	Rai14	retinoic acid induced 14 [Source:MGI Symbol;Acc:MGI:1922896]
ENSMUSG00000056724	0.806822	3.5076	9.13124	0.00251281	0.043175	chr9	-	110654161	110624789	NM_183276	Nbeal2	neurobeachin-like 2 [Source:MGI Symbol;Acc:MGI:2448554]
ENSMUSG00000024151	0.805427	4.42486	8.16593	0.00426847	0.0571485	chr17	+	87672330	87723713	NM_008628	Msh2	mutS homolog 2 (E. coli) [Source:MGI Symbol;Acc:MGI:101816]
ENSMUSG00000001552	0.805363	6.82903	7.74414	0.00538871	0.0635523	chr11	-	100397749	100370619	NM_010593	Jup	junction plakoglobin [Source:MGI Symbol;Acc:MGI:96650]
ENSMUSG00000031824	0.804321	5.90238	10.7014	0.00107057	0.0258024	chr8	+	120114152	120154574	NM_001163762	6430548M08Rik	RIKEN cDNA 6430548M08 gene [Source:MGI Symbol;Acc:MGI:2443793]
ENSMUSG00000018417	0.804246	5.87642	8.60194	0.00335806	0.0501116	chr1	-	51916071	51749765	NM_010863	Myo1b	myosin IB [Source:MGI Symbol;Acc:MGI:107752]
ENSMUSG00000006498	0.804185	7.02898	8.33922	0.00387982	0.0542498	chr10	+	79854427	79864432	NM_001077363	Ptbp1	polypyrimidine tract binding protein 1 [Source:MGI Symbol;Acc:MGI:97791]
ENSMUSG00000001052	0.803783	4.5325	9.7859	0.00175855	0.0348081	chr3	-	130060907	129982759	NM_207209	Sec24b	Sec24 related gene family, member B (S. cerevisiae) [Source:MGI Symbol;Acc:MGI:2139764]
ENSMUSG00000028521	0.802957	2.48499	7.42017	0.00644968	0.0692227	chr4	-	103215164	103170649	NM_177732	Slc35d1	solute carrier family 35 (UDP-glucuronic acid/UDP-N-acetylgalactosamine dual transporter), member D1 [Source:MGI Symbol;Acc:MGI:2140361]
ENSMUSG00000075122	0.802381	2.92574	6.17673	0.0129441	0.0967561	chr16	+	38458933	38486933	NM_009855	Cd80	CD80 antigen [Source:MGI Symbol;Acc:MGI:101775]
ENSMUSG00000032253	0.801417	7.16634	13.6232	0.000223405	0.01005	chr9	-	82975516	82866159	NM_001081216	Phip	pleckstrin homology domain interacting protein [Source:MGI Symbol;Acc:MGI:1932404]
ENSMUSG00000038552	0.800828	3.68552	9.01467	0.00267822	0.0450166	chr5	-	31295936	31292242	NM_022424	Fndc4	fibronectin type III domain containing 4 [Source:MGI Symbol;Acc:MGI:1917195]
ENSMUSG00000059588	0.800593	4.41234	12.8027	0.000346122	0.0136506	chr2	-	84425411	84330626	NM_018782	Calcrl	calcitonin receptor-like [Source:MGI Symbol;Acc:MGI:1926944]
ENSMUSG00000021665	0.800021	3.16826	7.60718	0.00581363	0.0661808	chr13	-	97198357	97176332	NM_010422	Hexb	hexosaminidase B [Source:MGI Symbol;Acc:MGI:96074]
ENSMUSG00000031750	0.79973	4.34091	6.45682	0.0110528	0.0900748	chr8	-	110805903	110741840	NM_001135100	Il34	interleukin 34 [Source:MGI Symbol;Acc:MGI:1923777]
ENSMUSG00000027550	0.799006	3.9138	14.0404	0.000178929	0.00894317	chr3	+	14533788	14572658	NM_028915	Lrrcc1	leucine rich repeat and coiled-coil domain containing 1 [Source:MGI Symbol;Acc:MGI:1918960]
ENSMUSG00000076431	0.797368	7.19623	6.66408	0.00983754	0.0853437	chr13	-	28953713	28948919	NM_009238	Sox4	SRY (sex determining region Y)-box 4 [Source:MGI Symbol;Acc:MGI:98366]
ENSMUSG00000041936	0.795662	5.82921	6.9692	0.00829245	0.0781905	chr4	-	156197488	156165778	NM_021604	Agrn	agrin [Source:MGI Symbol;Acc:MGI:87961]
ENSMUSG00000031488	0.792463	3.91353	9.89741	0.00165512	0.0333477	chr8	-	27174646	27138773	NM_029423	Rab11fip1	RAB11 family interacting protein 1 (class I) [Source:MGI Symbol;Acc:MGI:1923017]
ENSMUSG00000027007	0.787814	4.85366	8.62683	0.00331248	0.0498524	chr2	+	79635352	79672966	NM_080558	Ssfa2	sperm specific antigen 2 [Source:MGI Symbol;Acc:MGI:1917849]
ENSMUSG00000050390	0.785781	3.23694	6.5495	0.0104914	0.0879434	chr4	-	129227911	129219578	NM_001285866	C77080	expressed sequence C77080 [Source:MGI Symbol;Acc:MGI:2140651]
ENSMUSG00000036863	0.785443	3.0812	9.79055	0.00175411	0.0347757	chr3	+	145987870	146021720	NM_001166064	Syde2	synapse defective 1, Rho GTPase, homolog 2 (C. elegans) [Source:MGI Symbol;Acc:MGI:3036264]
ENSMUSG00000031799	0.783911	8.57225	6.35312	0.0117175	0.0930827	chr8	+	72135259	72153142	NM_001001491	Tpm4	tropomyosin 4 [Source:MGI Symbol;Acc:MGI:2449202]
ENSMUSG00000013033	0.783892	5.80806	9.47482	0.00208311	0.0384046	chr8	+	83900105	83941954	NM_181039	Adgrl1	adhesion G protein-coupled receptor L1 [Source:MGI Symbol;Acc:MGI:1929461]
ENSMUSG00000028312	0.782423	6.28888	6.16284	0.0130462	0.097167	chr4	+	52439243	52488260	NM_001301412	Smc2	structural maintenance of chromosomes 2 [Source:MGI Symbol;Acc:MGI:106067]
ENSMUSG00000062210	0.781551	2.40652	6.15032	0.0131389	0.0975636	chr18	+	49979427	50091001	NM_001177759	Tnfaip8	tumor necrosis factor, alpha-induced protein 8 [Source:MGI Symbol;Acc:MGI:2147191]
ENSMUSG00000024535	0.781372	3.81248	8.4354	0.00367986	0.0526298	chr18	+	53245662	53390823	NM_029394	Snx24	sorting nexing 24 [Source:MGI Symbol;Acc:MGI:1916476]
ENSMUSG00000070639	0.779769	5.24949	12.6394	0.000377693	0.0142252	chr5	+	105415775	105490074	NM_001033550	Lrrc8b	leucine rich repeat containing 8 family, member B [Source:MGI Symbol;Acc:MGI:2141353]
ENSMUSG00000066278	0.778578	5.16004	6.91938	0.00852664	0.0792071	chr5	-	124032270	124004641	NM_177876	Vps37b	vacuolar protein sorting 37B (yeast) [Source:MGI Symbol;Acc:MGI:1916724]
ENSMUSG00000019873	0.777295	5.75315	7.06213	0.00787304	0.0765702	chr10	-	67096988	67009189	NM_001204915	Reep3	receptor accessory protein 3 [Source:MGI Symbol;Acc:MGI:88930]
ENSMUSG00000025854	0.774566	6.43476	7.30187	0.00688828	0.071783	chr5	+	138754514	138810077	NM_030565	Fam20c	family with sequence similarity 20, member C [Source:MGI Symbol;Acc:MGI:2136853]
ENSMUSG00000033420	0.774107	6.4895	7.57291	0.00592521	0.066637	chr6	-	87335775	87133854	NM_054041	Antxr1	anthrax toxin receptor 1 [Source:MGI Symbol;Acc:MGI:1916788]
ENSMUSG00000064351	0.773193	11.5359	6.90781	0.00858202	0.0794077	chrM	+	5328	6872	17708	mt-Co1	mitochondrially encoded cytochrome c oxidase I [Source:MGI Symbol;Acc:MGI:102504]
ENSMUSG00000037110	0.772311	4.2494	8.81624	0.00298562	0.0474134	chr2	-	146512004	146239879	NM_001033348	Ralgapa2	Ral GTPase activating protein, alpha subunit 2 (catalytic) [Source:MGI Symbol;Acc:MGI:3036245]
ENSMUSG00000046269	0.770955	3.26208	7.96231	0.00477613	0.0598032	chrX	-	7375830	7372591	NM_019461	Usp27x	ubiquitin specific peptidase 27, X chromosome [Source:MGI Symbol;Acc:MGI:1859645]
ENSMUSG00000038418	0.770787	5.68012	6.53668	0.0105672	0.0881504	chr18	+	34861207	34864956	NM_007913	Egr1	early growth response 1 [Source:MGI Symbol;Acc:MGI:95295]
ENSMUSG00000035441	0.76928	4.32652	6.97246	0.00827734	0.0781076	chr11	-	80780025	80482126	NM_177390	Myo1d	myosin ID [Source:MGI Symbol;Acc:MGI:107728]
ENSMUSG00000029363	0.767766	4.37931	6.21374	0.0126763	0.0956662	chr5	-	117389047	117378103	NM_028128	Rfc5	replication factor C (activator 1) 5 [Source:MGI Symbol;Acc:MGI:1919401]
ENSMUSG00000025212	0.766319	4.2209	10.1371	0.00145312	0.030994	chr19	+	45047576	45056383	NM_053197	Sfxn3	sideroflexin 3 [Source:MGI Symbol;Acc:MGI:2137679]
ENSMUSG00000019841	0.765161	5.2328	13.0754	0.000299203	0.0126329	chr10	+	39732118	39875211	NM_011264	Rev3l	REV3-like, catalytic subunit of DNA polymerase zeta RAD54 like (S. cerevisiae) [Source:MGI Symbol;Acc:MGI:1337131]
ENSMUSG00000057110	0.764666	4.55499	7.4223	0.00644204	0.0692227	chr2	+	35109619	35178422	NM_012018	Cntrl	centriolin [Source:MGI Symbol;Acc:MGI:1889576]
ENSMUSG00000024070	0.763624	6.42798	11.6377	0.000646282	0.0194529	chr17	-	79020816	78950549	NM_001171004	Prkd3	protein kinase D3 [Source:MGI Symbol;Acc:MGI:1922542]
ENSMUSG00000021549	0.763242	8.62321	6.73451	0.0094565	0.0838011	chr13	-	85289029	85214780	NM_145452	Rasa1	RAS p21 protein activator 1 [Source:MGI Symbol;Acc:MGI:97860]
ENSMUSG00000032712	0.760374	6.80012	12.3941	0.000430687	0.0152229	chr6	+	149309428	149335663	NM_001289662	2810474O19Rik	RIKEN cDNA 2810474O19 gene [Source:MGI Symbol;Acc:MGI:1914496]
ENSMUSG00000039735	0.759882	5.64878	7.80157	0.00522009	0.062369	chr3	-	122619715	122538725	NM_153118	Fnbp1l	formin binding protein 1-like [Source:MGI Symbol;Acc:MGI:1925642]
ENSMUSG00000026655	0.758764	4.87884	6.76945	0.00927317	0.0827694	chr2	+	3713458	3782142	NM_025626	Fam107b	family with sequence similarity 107, member B [Source:MGI Symbol;Acc:MGI:1913790]
ENSMUSG00000029669	0.758064	5.83944	9.75364	0.00178968	0.0351989	chr6	-	21852515	21771395	NM_173007	Tspan12	tetraspanin 12 [Source:MGI Symbol;Acc:MGI:1889818]
ENSMUSG00000028906	0.756627	4.49495	10.7646	0.00103459	0.0254451	chr4	-	132007437	131923413	NM_001128607	Epb4.1	erythrocyte protein band 4.1 [Source:MGI Symbol;Acc:MGI:95401]
ENSMUSG00000074305	0.755504	6.9061	7.84897	0.00508497	0.0615177	chr9	-	56418067	56205129	NM_172924	Peak1	pseudopodium-enriched atypical kinase 1 [Source:MGI Symbol;Acc:MGI:2442366]
ENSMUSG00000025025	0.754865	3.72632	9.48543	0.0020711	0.0383823	chr19	+	53310506	53375810	NM_001008542	Mxi1	Max interacting protein 1 [Source:MGI Symbol;Acc:MGI:97245]
ENSMUSG00000024085	0.754425	5.61411	6.25931	0.0123542	0.0949278	chr17	+	64600736	64755110	NM_008549	Man2a1	mannosidase 2, alpha 1 [Source:MGI Symbol;Acc:MGI:104669]
ENSMUSG00000050721	0.754345	5.87794	7.6002	0.00583618	0.0661808	chr9	-	65580040	65554386	NM_153119	Plekho2	pleckstrin homology domain containing, family O member 2 [Source:MGI Symbol;Acc:MGI:2143132]
ENSMUSG00000026525	0.754311	4.0828	6.99109	0.00819163	0.0778148	chr1	-	175692776	175662421	NM_010098	Opn3	opsin 3 [Source:MGI Symbol;Acc:MGI:1338022]
ENSMUSG00000026238	0.753525	8.93402	6.11556	0.0133997	0.09873	chr1	+	86526726	86530712	NM_008972	Ptma	prothymosin alpha [Source:MGI Symbol;Acc:MGI:97803]
ENSMUSG00000053580	0.752154	5.29164	10.5625	0.00115407	0.0267361	chr11	+	105589991	105929304	NM_181071	Tanc2	tetratricopeptide repeat, ankyrin repeat and coiled-coil containing 2 [Source:MGI Symbol;Acc:MGI:2444121]
ENSMUSG00000032555	0.75177	6.67043	6.38585	0.0115034	0.0920233	chr9	+	103305215	103350428	NM_176979	Topbp1	topoisomerase (DNA) II binding protein 1 [Source:MGI Symbol;Acc:MGI:1920018]
ENSMUSG00000020086	0.749585	3.63283	6.1938	0.0128199	0.0960598	chr10	-	61784147	61738665	NM_207000	H2afy2	H2A histone family, member Y2 [Source:MGI Symbol;Acc:MGI:3037658]
ENSMUSG00000043542	0.746669	6.1576	11.2222	0.000808258	0.022369	chr3	+	7503483	7553836	NM_173181	Zc2hc1a	zinc finger, C2HC-type containing 1A [Source:MGI Symbol;Acc:MGI:1914556]
ENSMUSG00000032352	0.743641	3.75121	11.559	0.00067423	0.0199543	chr9	-	77544870	77430823	NM_001146048	Lrrc1	leucine rich repeat containing 1 [Source:MGI Symbol;Acc:MGI:2442313]
ENSMUSG00000052949	0.742317	3.2444	7.38213	0.00658752	0.0699303	chr11	-	116413004	116336353	NM_027258	Rnf157	ring finger protein 157 [Source:MGI Symbol;Acc:MGI:2442484]
ENSMUSG00000035455	0.740003	4.66157	6.18371	0.0128932	0.096434	chr11	-	11808959	11800288	NM_021891	Fignl1	fidgetin-like 1 [Source:MGI Symbol;Acc:MGI:1890648]
ENSMUSG00000029787	0.739944	5.28536	10.2323	0.00138005	0.0304325	chr6	+	56714927	56761911	NM_030235	Avl9	AVL9 homolog (S. cerevisiase) [Source:MGI Symbol;Acc:MGI:1926187]
ENSMUSG00000021745	0.73928	6.00363	7.56946	0.00593654	0.0667039	chr14	+	11553532	12242041	NM_008981	Ptprg	protein tyrosine phosphatase, receptor type, G [Source:MGI Symbol;Acc:MGI:97814]
ENSMUSG00000018849	0.737566	3.99438	9.45963	0.00210044	0.0384386	chr11	-	35980527	35838400	NM_170779	Wwc1	WW, C2 and coiled-coil domain containing 1 [Source:MGI Symbol;Acc:MGI:2388637]
ENSMUSG00000031146	0.737478	6.27863	12.9578	0.00031859	0.0130939	chrX	-	7671390	7667941	NM_019755	Plp2	proteolipid protein 2 [Source:MGI Symbol;Acc:MGI:1298382]
ENSMUSG00000020653	0.736726	4.28851	13.9483	0.000187907	0.00918812	chr12	+	24651371	24662774	NM_178357	Klf11	Kruppel-like factor 11 [Source:MGI Symbol;Acc:MGI:2653368]
ENSMUSG00000040021	0.73619	5.95836	13.0484	0.000303538	0.012686	chr10	+	7681209	7716458	NM_010690	Lats1	large tumor suppressor [Source:MGI Symbol;Acc:MGI:1333883]
ENSMUSG00000031012	0.735946	4.96239	14.3925	0.00014839	0.00794691	chrX	-	13846578	13517080	NM_001284503	Cask	calcium/calmodulin-dependent serine protein kinase (MAGUK family) [Source:MGI Symbol;Acc:MGI:1309489]
ENSMUSG00000038718	0.732817	3.52676	10.8474	0.000989336	0.0250323	chr2	-	34372038	34171457	NM_001290576	Pbx3	pre B cell leukemia homeobox 3 [Source:MGI Symbol;Acc:MGI:97496]
ENSMUSG00000041238	0.732538	5	9.06948	0.00259911	0.0439857	chr18	+	11657349	11743207	NM_001081223	Rbbp8	retinoblastoma binding protein 8 [Source:MGI Symbol;Acc:MGI:2442995]
ENSMUSG00000070047	0.731574	9.30286	6.519	0.0106728	0.0886726	chr8	+	44950208	45052257	NM_001081286	Fat1	FAT tumor suppressor homolog 1 (Drosophila) [Source:MGI Symbol;Acc:MGI:109168]
ENSMUSG00000038764	0.729213	3.75332	7.42967	0.0064157	0.0691365	chr4	-	57301837	57190841	NM_011207	Ptpn3	protein tyrosine phosphatase, non-receptor type 3 [Source:MGI Symbol;Acc:MGI:105307]
ENSMUSG00000027459	0.72891	3.89778	6.93496	0.00845267	0.07889	chr2	-	151973935	151969398	NM_028666	Fam110a	family with sequence similarity 110, member A [Source:MGI Symbol;Acc:MGI:1921097]
ENSMUSG00000051341	0.728146	4.8332	6.13773	0.0132327	0.0980253	chr17	+	21555046	21562066	NM_144515	Zfp52	zinc finger protein 52 [Source:MGI Symbol;Acc:MGI:99199]
ENSMUSG00000031583	0.726444	4.92841	6.32963	0.0118737	0.0936798	chr8	-	33385527	33234384	NM_001122822	Wrn	Werner syndrome homolog (human) [Source:MGI Symbol;Acc:MGI:109635]
ENSMUSG00000048490	0.725476	6.10959	18.1268	2.06676e-05	0.00195175	chr16	-	76373049	76290862	NM_173440	Nrip1	nuclear receptor interacting protein 1 [Source:MGI Symbol;Acc:MGI:1315213]
ENSMUSG00000092035	0.725133	6.43752	9.61842	0.00192636	0.0371778	chr6	+	4747306	4760517	NM_130877	Peg10	paternally expressed 10 [Source:MGI Symbol;Acc:MGI:2157785]
ENSMUSG00000038178	0.725111	5.11889	8.79696	0.00301733	0.0476115	chr11	+	75531698	75577575	NM_173388	Slc43a2	solute carrier family 43, member 2 [Source:MGI Symbol;Acc:MGI:2442746]
ENSMUSG00000047996	0.72289	2.80613	6.35623	0.011697	0.0929969	chrX	-	78583891	78449613	NM_001289683	Prrg1	proline rich Gla (G-carboxyglutamic acid) 1 [Source:MGI Symbol;Acc:MGI:1917364]
ENSMUSG00000040751	0.719017	1.8273	6.49145	0.0108395	0.0890405	chr5	-	134615025	134600022	NM_022964	Lat2	linker for activation of T cells family, member 2 [Source:MGI Symbol;Acc:MGI:1926479]
ENSMUSG00000044345	0.717685	4.56292	9.55161	0.00199774	0.037905	chr19	+	42147400	42151703	NM_183195	Marveld1	MARVEL (membrane-associating) domain containing 1 [Source:MGI Symbol;Acc:MGI:2147570]
ENSMUSG00000031015	0.716818	4.91595	8.78854	0.00303128	0.0477123	chr7	+	110221703	110283503	NM_009302	Swap70	SWA-70 protein [Source:MGI Symbol;Acc:MGI:1298390]
ENSMUSG00000027635	0.713176	3.53773	7.38653	0.0065714	0.0698409	chr2	-	157007075	156995265	NM_025853	Dsn1	DSN1, MIND kinetochore complex component, homolog (S. cerevisiae) [Source:MGI Symbol;Acc:MGI:1914184]
ENSMUSG00000106847	0.712991	3.5358	9.98789	0.00157573	0.0323809	chr15	-	72810324	72805600	NR_002864	Peg13	paternally expressed 13 [Source:MGI Symbol;Acc:MGI:2663476]
ENSMUSG00000031530	0.71258	7.03015	6.3201	0.0119377	0.0940047	chr8	+	34807297	34819894	NM_176933	Dusp4	dual specificity phosphatase 4 [Source:MGI Symbol;Acc:MGI:2442191]
ENSMUSG00000021318	0.710746	4.74566	6.98064	0.0082396	0.0778702	chr13	+	15463980	15730026	NM_008130	Gli3	GLI-Kruppel family member GLI3 [Source:MGI Symbol;Acc:MGI:95729]
ENSMUSG00000068335	0.710629	4.85766	6.69398	0.00967389	0.084581	chr6	-	83033471	83030934	NM_010070	Dok1	docking protein 1 [Source:MGI Symbol;Acc:MGI:893587]
ENSMUSG00000036139	0.710085	1.99315	6.89696	0.00863423	0.079712	chr15	+	102977032	102985099	NM_008272	Hoxc9	homeobox C9 [Source:MGI Symbol;Acc:MGI:96199]
ENSMUSG00000023800	0.710075	6.58663	9.15202	0.00248444	0.0427901	chr17	+	3397207	3519397	NM_011878	Tiam2	T cell lymphoma invasion and metastasis 2 [Source:MGI Symbol;Acc:MGI:1344338]
ENSMUSG00000028693	0.709463	5.8212	7.27041	0.00700998	0.0721645	chr4	-	116627941	116601609	NM_016777	Nasp	nuclear autoantigenic sperm protein (histone-binding) [Source:MGI Symbol;Acc:MGI:1355328]
ENSMUSG00000001173	0.709114	4.4902	6.64689	0.00993291	0.0857502	chrX	+	47912387	47965868	NM_177215	Ocrl	oculocerebrorenal syndrome of Lowe [Source:MGI Symbol;Acc:MGI:109589]
ENSMUSG00000023018	0.708378	4.0632	10.1732	0.00142494	0.0308251	chr15	+	99702287	99713995	NM_031842	Smarcd1	SWI/SNF related, matrix associated, actin dependent regulator of chromatin, subfamily d, member 1 [Source:MGI Symbol;Acc:MGI:1933623]
ENSMUSG00000027646	0.708365	5.9146	7.00844	0.00811263	0.077559	chr2	+	157424280	157471862	NM_001025395	Src	Rous sarcoma oncogene [Source:MGI Symbol;Acc:MGI:98397]
ENSMUSG00000051950	0.703654	4.0744	10.5109	0.00118672	0.0272373	chr5	+	149678230	149762599	NM_001081204	B3glct	beta-3-glucosyltransferase [Source:MGI Symbol;Acc:MGI:2685903]
ENSMUSG00000050730	0.702701	4.62992	11.9171	0.000556218	0.017911	chr9	-	9239101	8994329	NM_027823	Arhgap42	Rho GTPase activating protein 42 [Source:MGI Symbol;Acc:MGI:1918794]
ENSMUSG00000008475	0.702353	5.89538	7.1259	0.00759785	0.075389	chr1	+	152766542	152775597	NM_026369	Arpc5	actin related protein 2/3 complex, subunit 5 [Source:MGI Symbol;Acc:MGI:1915021]
ENSMUSG00000032855	0.701996	6.85381	8.01815	0.00463108	0.0590774	chr17	+	24549950	24596514	NM_013630	Pkd1	polycystic kidney disease 1 homolog [Source:MGI Symbol;Acc:MGI:97603]
ENSMUSG00000026643	0.701724	6.40929	9.6194	0.00192533	0.0371778	chr2	+	3284212	3328877	NM_008708	Nmt2	N-myristoyltransferase 2 [Source:MGI Symbol;Acc:MGI:1202298]
ENSMUSG00000033389	0.700292	4.58922	9.21577	0.00239939	0.0418658	chr11	-	65162904	65002040	NM_001099288	Arhgap44	Rho GTPase activating protein 44 [Source:MGI Symbol;Acc:MGI:2144423]
ENSMUSG00000022773	0.696783	2.76825	6.71547	0.009558	0.0843095	chr16	+	17069696	17086736	NM_023249	Ypel1	yippee-like 1 (Drosophila) [Source:MGI Symbol;Acc:MGI:1913303]
ENSMUSG00000019189	0.695046	5.70407	6.29041	0.0121393	0.0942128	chr11	+	44519442	44554977	NM_001166553	Rnf145	ring finger protein 145 [Source:MGI Symbol;Acc:MGI:1921565]
ENSMUSG00000027394	0.694907	5.96188	6.12571	0.013323	0.0984581	chr2	+	129065942	129096283	NM_027192	Ttl	tubulin tyrosine ligase [Source:MGI Symbol;Acc:MGI:1916987]
ENSMUSG00000026565	0.692628	5.2464	13.5336	0.000234332	0.0103904	chr1	-	166002678	165865154	NM_011137	Pou2f1	POU domain, class 2, transcription factor 1 [Source:MGI Symbol;Acc:MGI:101898]
ENSMUSG00000024190	0.692601	5.31608	10.7566	0.00103909	0.0255052	chr17	-	26508519	26505590	NM_013642	Dusp1	dual specificity phosphatase 1 [Source:MGI Symbol;Acc:MGI:105120]
ENSMUSG00000045763	0.692116	6.02806	7.74835	0.00537616	0.0635523	chr15	-	25413764	25363285	NM_027395	Basp1	brain abundant, membrane attached signal protein 1 [Source:MGI Symbol;Acc:MGI:1917600]
ENSMUSG00000032413	0.690142	5.02473	8.59106	0.00337818	0.0502906	chr9	-	96631617	96539300	NM_053268	Rasa2	RAS p21 protein activator 2 [Source:MGI Symbol;Acc:MGI:2149960]
ENSMUSG00000052151	0.689286	5.51057	8.48966	0.00357172	0.051716	chr10	-	79533787	79526430	NM_001302390	Ppap2c	phosphatidic acid phosphatase type 2C [Source:MGI Symbol;Acc:MGI:1354945]
ENSMUSG00000048911	0.687741	3.6653	7.00206	0.00814159	0.0776464	chr2	-	131352881	131298064	NM_178607	Rnf24	ring finger protein 24 [Source:MGI Symbol;Acc:MGI:1261771]
ENSMUSG00000042272	0.687667	6.08554	9.89966	0.0016531	0.0333477	chr2	-	77280592	77186555	NM_175465	Sestd1	SEC14 and spectrin domains 1 [Source:MGI Symbol;Acc:MGI:1916262]
ENSMUSG00000026556	0.687446	4.08131	6.98237	0.00823166	0.0778698	chr1	-	172027295	172000960	NM_033509	Vangl2	vang-like 2 (van gogh, Drosophila) [Source:MGI Symbol;Acc:MGI:2135272]
ENSMUSG00000056515	0.686391	8.25202	8.63412	0.00329925	0.0498351	chr17	-	65772752	65651726	NM_133685	Rab31	RAB31, member RAS oncogene family [Source:MGI Symbol;Acc:MGI:1914603]
ENSMUSG00000031367	0.684603	5.28274	8.3824	0.00378871	0.0534437	chrX	+	163909017	163933666	NM_001290379	Ap1s2	adaptor-related protein complex 1, sigma 2 subunit [Source:MGI Symbol;Acc:MGI:1889383]
ENSMUSG00000000282	0.684529	3.35866	6.14364	0.0131886	0.0978153	chr11	+	74830920	74845725	NM_010813	Mnt	max binding protein [Source:MGI Symbol;Acc:MGI:109150]
ENSMUSG00000051065	0.684424	4.487	7.9064	0.00492603	0.0605843	chr16	-	28929698	28826176	NM_177718	Mb21d2	Mab-21 domain containing 2 [Source:MGI Symbol;Acc:MGI:1917028]
ENSMUSG00000040128	0.682527	5.34063	10.1731	0.00142507	0.0308251	chr4	-	33248510	33245423	NM_001033225	Pnrc1	proline-rich nuclear receptor coactivator 1 [Source:MGI Symbol;Acc:MGI:1917838]
ENSMUSG00000031246	0.682446	7.14205	7.47299	0.00626313	0.0683385	chrX	+	109095365	109162471	NM_019989	Sh3bgrl	SH3-binding domain glutamic acid-rich protein like [Source:MGI Symbol;Acc:MGI:1930849]
ENSMUSG00000002028	0.681787	5.34222	6.22523	0.0125943	0.0954987	chr9	-	44881274	44803355	NM_001081049	Kmt2a	lysine (K)-specific methyltransferase 2A [Source:MGI Symbol;Acc:MGI:96995]
ENSMUSG00000051344	0.681322	4.15953	7.51909	0.00610484	0.0678553	chr1	-	64956824	64789121	NM_001039493	Plekhm3	pleckstrin homology domain containing, family M, member 3 [Source:MGI Symbol;Acc:MGI:2443627]
ENSMUSG00000026688	0.680897	4.12846	6.55486	0.0104598	0.0879332	chr1	-	167393841	167371966	NM_025569	Mgst3	microsomal glutathione S-transferase 3 [Source:MGI Symbol;Acc:MGI:1913697]
ENSMUSG00000029338	0.680132	8.1684	8.80647	0.00300163	0.0475457	chr5	-	98030962	97882783	NM_133738	Antxr2	anthrax toxin receptor 2 [Source:MGI Symbol;Acc:MGI:1919164]
ENSMUSG00000040339	0.679783	5.86051	8.58764	0.00338453	0.0503177	chr3	-	109027607	108970997	NM_001163567	Fam102b	family with sequence similarity 102, member B [Source:MGI Symbol;Acc:MGI:3036259]
ENSMUSG00000048279	0.67681	7.57168	9.42433	0.00214125	0.0387839	chr14	+	61138457	61240695	NM_172809	Sacs	sacsin [Source:MGI Symbol;Acc:MGI:1354724]
ENSMUSG00000020453	0.676728	4.90776	8.52018	0.00351229	0.0512389	chr11	+	3289167	3309083	NR_045109	Patz1	POZ (BTB) and AT hook containing zinc finger 1 [Source:MGI Symbol;Acc:MGI:1891832]
ENSMUSG00000070733	0.676722	6.92926	10.701	0.00107076	0.0258024	chr5	-	73256619	73020322	NM_028194	Fryl	furry homolog-like (Drosophila) [Source:MGI Symbol;Acc:MGI:1919563]
ENSMUSG00000066894	0.675094	2.93423	6.61736	0.0100989	0.0862804	chr5	+	117319083	117355005	NM_001033311	Vsig10	V-set and immunoglobulin domain containing 10 [Source:MGI Symbol;Acc:MGI:2448533]
ENSMUSG00000024456	0.674808	5.1819	13.3911	0.000252827	0.0111307	chr18	-	37935476	37843601	NM_007858	Diap1	diaphanous homolog 1 (Drosophila) [Source:MGI Symbol;Acc:MGI:1194490]
ENSMUSG00000036620	0.673209	5.93451	10.3943	0.00126408	0.02857	chr11	+	50225335	50235103	NM_145926	Mgat4b	mannoside acetylglucosaminyltransferase 4, isoenzyme B [Source:MGI Symbol;Acc:MGI:2143974]
ENSMUSG00000035168	0.67166	6.74412	10.5134	0.00118512	0.0272373	chr2	+	59612042	59845717	NM_001290659	Tanc1	tetratricopeptide repeat, ankyrin repeat and coiled-coil containing 1 [Source:MGI Symbol;Acc:MGI:1914110]
ENSMUSG00000036478	0.671011	6.80673	13.8258	0.000200568	0.00943781	chr10	+	96617001	96622813	NM_007569	Btg1	B cell translocation gene 1, anti-proliferative [Source:MGI Symbol;Acc:MGI:88215]
ENSMUSG00000064341	0.67078	9.37906	7.06366	0.00786633	0.0765702	chrM	+	2751	3707	17716	mt-Nd1	mitochondrially encoded NADH dehydrogenase 1 [Source:MGI Symbol;Acc:MGI:101787]
ENSMUSG00000028382	0.670545	6.65871	8.85475	0.00292328	0.0468444	chr4	-	59549364	59471868	NM_178164	Ptbp3	polypyrimidine tract binding protein 3 [Source:MGI Symbol;Acc:MGI:1923334]
ENSMUSG00000022177	0.668901	3.77319	7.64873	0.00568122	0.0652756	chr14	-	54554361	54541785	NM_145462	Haus4	HAUS augmin-like complex, subunit 4 [Source:MGI Symbol;Acc:MGI:1261794]
ENSMUSG00000037876	0.667941	7.73137	9.15363	0.00248225	0.0427901	chr10	+	67185750	67256318	NM_001242396	Jmjd1c	jumonji domain containing 1C [Source:MGI Symbol;Acc:MGI:1918614]
ENSMUSG00000038518	0.665606	4.28051	10.6586	0.00109562	0.0259653	chr13	+	44730774	44920108	NM_001205044	Jarid2	jumonji, AT rich interactive domain 2 [Source:MGI Symbol;Acc:MGI:104813]
ENSMUSG00000019796	0.665455	4.2253	8.62886	0.00330879	0.0498524	chr10	+	7589817	7625483	NM_172784	Lrp11	low density lipoprotein receptor-related protein 11 [Source:MGI Symbol;Acc:MGI:2442989]
ENSMUSG00000027940	0.664928	8.09638	7.25198	0.0070823	0.0725291	chr3	+	90072649	90092130	NM_001293748	Tpm3	tropomyosin 3, gamma [Source:MGI Symbol;Acc:MGI:1890149]
ENSMUSG00000026821	0.664886	5.41755	9.62378	0.00192074	0.0371778	chr2	+	28513326	28553081	NM_001145834	Ralgds	ral guanine nucleotide dissociation stimulator [Source:MGI Symbol;Acc:MGI:107485]
ENSMUSG00000034317	0.664853	4.68646	6.77479	0.00924546	0.0826393	chr3	-	69044755	69035288	NM_025863	Trim59	tripartite motif-containing 59 [Source:MGI Symbol;Acc:MGI:1914199]
ENSMUSG00000021377	0.663395	6.21778	9.99591	0.00156888	0.0322939	chr13	-	47106190	47084782	NM_025900	Dek	DEK oncogene (DNA binding) [Source:MGI Symbol;Acc:MGI:1926209]
ENSMUSG00000040669	0.662644	4.15849	8.69127	0.00319738	0.0489798	chr6	-	122339658	122317738	NM_007905	Phc1	polyhomeotic-like 1 (Drosophila) [Source:MGI Symbol;Acc:MGI:103248]
ENSMUSG00000001768	0.662434	4.77102	6.32747	0.0118882	0.093728	chr2	+	145786116	145887616	NM_028724	Rin2	Ras and Rab interactor 2 [Source:MGI Symbol;Acc:MGI:1921280]
ENSMUSG00000044783	0.662288	6.53638	6.54327	0.0105282	0.0879434	chr1	-	88277633	88262471	NM_198652	Hjurp	Holliday junction recognition protein [Source:MGI Symbol;Acc:MGI:2685821]
ENSMUSG00000026014	0.66195	5.09586	7.2952	0.00691389	0.0718151	chr1	-	60566779	60482292	NM_001045513	Raph1	Ras association (RalGDS/AF-6) and pleckstrin homology domains 1 [Source:MGI Symbol;Acc:MGI:1924550]
ENSMUSG00000057614	0.661309	4.95034	7.08192	0.00778656	0.076203	chr5	-	18360355	18265135	NM_010305	Gnai1	guanine nucleotide binding protein (G protein), alpha inhibiting 1 [Source:MGI Symbol;Acc:MGI:95771]
ENSMUSG00000021277	0.659133	6.28859	11.873	0.000569527	0.0180485	chr12	+	111166370	111267153	NM_001286122	Traf3	TNF receptor-associated factor 3 [Source:MGI Symbol;Acc:MGI:108041]
ENSMUSG00000034858	0.657195	4.42773	7.79099	0.00525073	0.0625788	chr9	+	74953053	75032468	NM_001113283	Fam214a	family with sequence similarity 214, member A [Source:MGI Symbol;Acc:MGI:2387648]
ENSMUSG00000033767	0.65706	5.71696	13.13	0.000290603	0.0123967	chr3	-	84040175	83897655	NM_172681	D930015E06Rik	RIKEN cDNA D930015E06 gene [Source:MGI Symbol;Acc:MGI:2443399]
ENSMUSG00000040596	0.65468	5.83864	8.92057	0.00281977	0.0458389	chr1	-	166409863	166396169	NM_175170	Pogk	pogo transposable element with KRAB domain [Source:MGI Symbol;Acc:MGI:1918842]
ENSMUSG00000025417	0.65109	5.11727	10.906	0.000958553	0.0246022	chr10	-	127211622	127197067	NM_054097	Pip4k2c	phosphatidylinositol-5-phosphate 4-kinase, type II, gamma [Source:MGI Symbol;Acc:MGI:2152214]
ENSMUSG00000035914	0.649042	5.56299	8.45013	0.00365018	0.0524465	chr9	-	58555132	58524302	NM_133983	Cd276	CD276 antigen [Source:MGI Symbol;Acc:MGI:2183926]
ENSMUSG00000033149	0.648879	6.97007	7.94857	0.00481254	0.0600161	chr16	-	45844378	45746243	NM_153412	Phldb2	pleckstrin homology-like domain, family B, member 2 [Source:MGI Symbol;Acc:MGI:2444981]
ENSMUSG00000032440	0.647958	6.09708	8.73752	0.00311728	0.0486155	chr9	-	116175363	116087698	NM_009371	Tgfbr2	transforming growth factor, beta receptor II [Source:MGI Symbol;Acc:MGI:98729]
ENSMUSG00000024960	0.646826	6.53459	6.74475	0.0094024	0.0835611	chr19	-	6969759	6953714	NM_008874	Plcb3	phospholipase C, beta 3 [Source:MGI Symbol;Acc:MGI:104778]
ENSMUSG00000019889	0.644933	5.65514	9.17025	0.00245981	0.0427391	chr10	+	28074820	28597397	NM_008983	Ptprk	protein tyrosine phosphatase, receptor type, K [Source:MGI Symbol;Acc:MGI:103310]
ENSMUSG00000009905	0.644072	4.97234	7.48977	0.00620504	0.0682333	chr1	-	106759727	106720459	NM_027534	Kdsr	3-ketodihydrosphingosine reductase [Source:MGI Symbol;Acc:MGI:1918000]
ENSMUSG00000055485	0.641533	5.25134	6.54529	0.0105162	0.0879434	chr2	-	157079254	157015799	NM_001164663	Soga1	suppressor of glucose, autophagy associated 1 [Source:MGI Symbol;Acc:MGI:2444575]
ENSMUSG00000033487	0.641426	5.93891	8.13501	0.00434186	0.0576644	chr14	-	72710003	72537946	NM_207636	Fndc3a	fibronectin type III domain containing 3A [Source:MGI Symbol;Acc:MGI:1196463]
ENSMUSG00000054520	0.640865	5.45319	9.53228	0.00201889	0.0380148	chr5	+	34525846	34563641	NM_011893	Sh3bp2	SH3-domain binding protein 2 [Source:MGI Symbol;Acc:MGI:1346349]
ENSMUSG00000010175	0.640393	3.65639	8.02909	0.0046032	0.058933	chr1	-	190170714	190118035	NM_008937	Prox1	prospero homeobox 1 [Source:MGI Symbol;Acc:MGI:97772]
ENSMUSG00000089715	0.637913	5.5571	8.33665	0.00388532	0.0542498	chr15	-	79834688	79823896	NM_028763	Cbx6	chromobox 6 [Source:MGI Symbol;Acc:MGI:3512628]
ENSMUSG00000026987	0.636988	5.49066	12.2852	0.000456576	0.0157368	chr2	-	60125697	59899363	NM_001001182	Baz2b	bromodomain adjacent to zinc finger domain, 2B [Source:MGI Symbol;Acc:MGI:2442782]
ENSMUSG00000041417	0.633097	5.43693	8.95884	0.00276131	0.0454257	chr13	-	101768217	101680563	NM_001077495	Pik3r1	phosphatidylinositol 3-kinase, regulatory subunit, polypeptide 1 (p85 alpha) [Source:MGI Symbol;Acc:MGI:97583]
ENSMUSG00000043391	0.632963	3.52066	6.33163	0.0118603	0.0936336	chr16	-	21694665	21649045	NM_001001881	2510009E07Rik	RIKEN cDNA 2510009E07 gene [Source:MGI Symbol;Acc:MGI:1919440]
ENSMUSG00000034832	0.631024	5.11458	10.8212	0.00100347	0.0252266	chr6	-	83441675	83362373	NM_183138	Tet3	tet methylcytosine dioxygenase 3 [Source:MGI Symbol;Acc:MGI:2446229]
ENSMUSG00000024981	0.62901	5.55312	6.0956	0.0135519	0.0992603	chr19	+	55253369	55296627	NM_027976	Acsl5	acyl-CoA synthetase long-chain family member 5 [Source:MGI Symbol;Acc:MGI:1919129]
ENSMUSG00000046111	0.627291	4.91668	8.04496	0.00456304	0.0589274	chr9	-	15357788	15316915	NM_176976	Cep295	centrosomal protein 295 [Source:MGI Symbol;Acc:MGI:2442521]
ENSMUSG00000032741	0.626791	6.14177	9.08405	0.00257848	0.0438165	chr5	-	120588673	120534153	NM_145853	Tpcn1	two pore channel 1 [Source:MGI Symbol;Acc:MGI:2182472]
ENSMUSG00000019699	0.626608	5.00007	6.64369	0.00995074	0.0858006	chr1	-	177248767	177022115	NM_011785	Akt3	thymoma viral proto-oncogene 3 [Source:MGI Symbol;Acc:MGI:1345147]
ENSMUSG00000006219	0.624585	4.50383	6.08115	0.0136632	0.0997211	chr4	-	141599924	141576062	NM_001163256	Fblim1	filamin binding LIM protein 1 [Source:MGI Symbol;Acc:MGI:1921452]
ENSMUSG00000022358	0.623858	6.72419	7.50824	0.00614174	0.0679784	chr15	-	58214892	58175879	NM_026346	Fbxo32	F-box protein 32 [Source:MGI Symbol;Acc:MGI:1914981]
ENSMUSG00000032477	0.622622	4.85067	6.36517	0.0116382	0.0927082	chr9	+	109875579	109893895	NM_007658	Cdc25a	cell division cycle 25A [Source:MGI Symbol;Acc:MGI:103198]
ENSMUSG00000073591	0.621698	3.66088	6.98739	0.00820858	0.0778148	chr18	+	37517871	37524479	NM_053147	Pcdhb22	protocadherin beta 22 [Source:MGI Symbol;Acc:MGI:2136760]
ENSMUSG00000066877	0.62106	5.98134	8.94935	0.00277568	0.0456007	chr1	+	43445751	43570515	NM_010879	Nck2	non-catalytic region of tyrosine kinase adaptor protein 2 [Source:MGI Symbol;Acc:MGI:1306821]
ENSMUSG00000020423	0.620508	5.94673	6.79023	0.00916583	0.0824753	chr1	-	134079120	134075170	NM_007570	Btg2	B cell translocation gene 2, anti-proliferative [Source:MGI Symbol;Acc:MGI:108384]
ENSMUSG00000022283	0.620032	7.92958	6.47451	0.0109432	0.0894771	chr15	-	36608973	36595661	NM_008774	Pabpc1	poly(A) binding protein, cytoplasmic 1 [Source:MGI Symbol;Acc:MGI:1349722]
ENSMUSG00000017756	0.619658	5.87618	8.99016	0.00271437	0.0450774	chr13	+	73763697	73816743	NM_011390	Slc12a7	solute carrier family 12, member 7 [Source:MGI Symbol;Acc:MGI:1342283]
ENSMUSG00000073643	0.610557	5.59646	11.9904	0.00053475	0.0175475	chr1	-	79761769	79702262	NM_001111279	Wdfy1	WD repeat and FYVE domain containing 1 [Source:MGI Symbol;Acc:MGI:1916618]
ENSMUSG00000073062	0.610335	2.69869	6.50121	0.0107801	0.0888883	chrX	+	94724569	94730187	NM_001081473	Zxdb	zinc finger, X-linked, duplicated B [Source:MGI Symbol;Acc:MGI:3694898]
ENSMUSG00000015937	0.610158	5.99617	8.1169	0.00438545	0.0577768	chr13	-	56135631	56073619	NM_012015	H2afy	H2A histone family, member Y [Source:MGI Symbol;Acc:MGI:1349392]
ENSMUSG00000028868	0.609736	6.6227	10.0506	0.00152299	0.0317723	chr4	+	133130505	133199756	NM_153423	Wasf2	WAS protein family, member 2 [Source:MGI Symbol;Acc:MGI:1098641]
ENSMUSG00000030528	0.609456	3.94904	6.52834	0.0106169	0.0883264	chr7	-	80535119	80454993	NM_001042527	Blm	Bloom syndrome, RecQ helicase-like [Source:MGI Symbol;Acc:MGI:1328362]
ENSMUSG00000024542	0.609191	5.28093	6.91849	0.00853091	0.0792071	chr18	+	67800107	67885168	NM_027556	Cep192	centrosomal protein 192 [Source:MGI Symbol;Acc:MGI:1918049]
ENSMUSG00000029094	0.609015	6.10356	8.71341	0.00315877	0.0486468	chr5	+	35893319	36003923	NM_027373	Afap1	actin filament associated protein 1 [Source:MGI Symbol;Acc:MGI:1917542]
ENSMUSG00000038065	0.608118	4.38003	7.29135	0.00692873	0.0719088	chr6	+	54681624	54703851	NM_001289740	Mturn	maturin, neural progenitor differentiation regulator homolog (Xenopus) [Source:MGI Symbol;Acc:MGI:1915485]
ENSMUSG00000042557	0.607805	5.88585	9.54846	0.00200117	0.0379119	chr9	+	57075338	57128366	NM_001110351	Sin3a	transcriptional regulator, SIN3A (yeast) [Source:MGI Symbol;Acc:MGI:107157]
ENSMUSG00000026915	0.606594	4.77222	8.30855	0.00394588	0.0546024	chr2	-	37647285	37569868	NM_009261	Strbp	spermatid perinuclear RNA binding protein [Source:MGI Symbol;Acc:MGI:104626]
ENSMUSG00000039976	0.605788	5.38727	9.95502	0.00160411	0.0328061	chr11	-	119228499	119143045	NM_172443	Tbc1d16	TBC1 domain family, member 16 [Source:MGI Symbol;Acc:MGI:2652878]
ENSMUSG00000031605	0.605777	4.85545	9.09632	0.00256124	0.0436434	chr8	-	64849818	64739863	NM_178633	Klhl2	kelch-like 2, Mayven [Source:MGI Symbol;Acc:MGI:1924363]
ENSMUSG00000037972	0.605618	6.63327	7.71785	0.00546775	0.0640096	chr16	+	11066298	11074983	NM_009223	Snn	stannin [Source:MGI Symbol;Acc:MGI:1276549]
ENSMUSG00000007379	0.601168	4.20012	6.52936	0.0106108	0.0883264	chr3	+	103127556	103169738	NM_177857	Dennd2c	DENN/MADD domain containing 2C [Source:MGI Symbol;Acc:MGI:3036254]
ENSMUSG00000022451	0.600794	6.05833	6.21929	0.0126366	0.0955547	chr15	-	94589879	94577951	NM_008971	Twf1	twinfilin, actin-binding protein, homolog 1 (Drosophila) [Source:MGI Symbol;Acc:MGI:1100520]
ENSMUSG00000031557	0.60028	5.83494	8.34224	0.00387338	0.0542498	chr8	-	25101985	25040840	NM_031257	Plekha2	pleckstrin homology domain-containing, family A (phosphoinositide binding specific) member 2 [Source:MGI Symbol;Acc:MGI:1928144]
ENSMUSG00000040661	0.599113	6.53773	7.72682	0.00544065	0.0638181	chr9	-	106789194	106688082	NM_030730	Rad54l2	RAD54 like 2 (S. cerevisiae) [Source:MGI Symbol;Acc:MGI:1933196]
ENSMUSG00000074480	0.59895	5.63869	7.42706	0.00642501	0.0691765	chr3	+	88532395	88541396	NM_001029890	Mex3a	mex3 homolog A (C. elegans) [Source:MGI Symbol;Acc:MGI:1919890]
ENSMUSG00000031207	0.595953	8.43444	8.25832	0.00405656	0.0554201	chrX	+	96096042	96168552	NM_010833	Msn	moesin [Source:MGI Symbol;Acc:MGI:97167]
ENSMUSG00000026782	0.594244	5.18656	6.62274	0.0100685	0.0860928	chr1	+	60409619	60481158	NM_198127	Abi2	abl-interactor 2 [Source:MGI Symbol;Acc:MGI:106913]
ENSMUSG00000031527	0.593326	5.07611	7.97823	0.00473431	0.0596417	chr8	-	35495533	35465265	NM_026067	Eri1	exoribonuclease 1 [Source:MGI Symbol;Acc:MGI:1914526]
ENSMUSG00000021752	0.59329	2.97747	6.30572	0.0120349	0.094211	chr14	+	8214502	8223561	NM_001305936	Kctd6	potassium channel tetramerisation domain containing 6 [Source:MGI Symbol;Acc:MGI:1918643]
ENSMUSG00000026510	0.592981	4.74744	6.99952	0.00815315	0.0776464	chr1	+	182409172	182462432	NM_173378	Trp53bp2	transformation related protein 53 binding protein 2 [Source:MGI Symbol;Acc:MGI:2138319]
ENSMUSG00000024054	0.592519	6.73391	6.69408	0.00967334	0.084581	chr17	-	71475343	71344489	NM_028887	Smchd1	SMC hinge domain containing 1 [Source:MGI Symbol;Acc:MGI:1921605]
ENSMUSG00000038047	0.592372	5.01121	6.96764	0.0082997	0.0781993	chr4	-	86612055	86578855	NM_173400	Haus6	HAUS augmin-like complex, subunit 6 [Source:MGI Symbol;Acc:MGI:1923389]
ENSMUSG00000039985	0.588892	5.73236	6.4984	0.0107971	0.0888883	chr6	-	148946467	148921035	NM_019643	Fam60a	family with sequence similarity 60, member A [Source:MGI Symbol;Acc:MGI:1929091]
ENSMUSG00000028412	0.584864	6.25388	10.1506	0.00144253	0.030902	chr4	+	53440413	53550200	NM_001159633	Slc44a1	solute carrier family 44, member 1 [Source:MGI Symbol;Acc:MGI:2140592]
ENSMUSG00000066406	0.5833	8.29797	6.26006	0.012349	0.0949278	chr7	+	75455534	75754609	NM_029332	Akap13	A kinase (PRKA) anchor protein 13 [Source:MGI Symbol;Acc:MGI:2676556]
ENSMUSG00000000078	0.582751	6.40738	7.6768	0.00559353	0.0647918	chr13	+	5861489	5870393	NM_011803	Klf6	Kruppel-like factor 6 [Source:MGI Symbol;Acc:MGI:1346318]
ENSMUSG00000000325	0.582354	4.43485	8.21772	0.00414833	0.0561795	chr16	+	18348182	18407076	NM_001272029	Arvcf	armadillo repeat gene deleted in velo-cardio-facial syndrome [Source:MGI Symbol;Acc:MGI:109620]
ENSMUSG00000038437	0.581781	5.4882	7.70632	0.00550279	0.0641008	chr11	+	97663414	97685463	NM_139311	Mllt6	myeloid/lymphoid or mixed-lineage leukemia (trithorax homolog, Drosophila); translocated to, 6 [Source:MGI Symbol;Acc:MGI:1935145]
ENSMUSG00000042699	0.581545	6.84285	6.27642	0.0122355	0.0944959	chr1	-	153487608	153455758	NM_007842	Dhx9	DEAH (Asp-Glu-Ala-His) box polypeptide 9 [Source:MGI Symbol;Acc:MGI:108177]
ENSMUSG00000036046	0.581365	7.04495	8.01324	0.00464365	0.0590774	chr15	-	84987971	84945720	NM_001033273	5031439G07Rik	RIKEN cDNA 5031439G07 gene [Source:MGI Symbol;Acc:MGI:2444899]
ENSMUSG00000026836	0.57828	4.20338	7.23672	0.00714273	0.0726668	chr2	-	58566826	58446441	NM_001110204	Acvr1	activin A receptor, type 1 [Source:MGI Symbol;Acc:MGI:87911]
ENSMUSG00000024480	0.577035	5.88544	7.98595	0.00471419	0.0595679	chr18	+	46741917	46790826	NM_009681	Ap3s1	adaptor-related protein complex 3, sigma 1 subunit [Source:MGI Symbol;Acc:MGI:1337062]
ENSMUSG00000030313	0.571037	5.07032	6.9511	0.00837676	0.0786856	chr6	-	149101680	148988071	NM_177192	Dennd5b	DENN/MADD domain containing 5B [Source:MGI Symbol;Acc:MGI:2444273]
ENSMUSG00000037674	0.569913	5.44909	6.46447	0.0110053	0.0898257	chr9	+	72532240	72622829	NM_001033536	Rfx7	regulatory factor X, 7 [Source:MGI Symbol;Acc:MGI:2442675]
ENSMUSG00000029108	0.56968	7.1472	6.41022	0.0113465	0.0914641	chr5	+	57717967	58133230	NM_001122758	Pcdh7	protocadherin 7 [Source:MGI Symbol;Acc:MGI:1860487]
ENSMUSG00000029101	0.568823	7.22547	6.20905	0.0127099	0.0956993	chr5	+	34949445	35033595	NM_173402	Rgs12	regulator of G-protein signaling 12 [Source:MGI Symbol;Acc:MGI:1918979]
ENSMUSG00000020063	0.5681	4.91202	8.98548	0.00272134	0.0451282	chr10	-	63339035	63319058	NM_001159589	Sirt1	sirtuin 1 [Source:MGI Symbol;Acc:MGI:2135607]
ENSMUSG00000040272	0.56575	3.0121	6.34613	0.0117638	0.0933481	chr2	-	93849941	93833467	NM_001290782	Accs	1-aminocyclopropane-1-carboxylate synthase (non-functional) [Source:MGI Symbol;Acc:MGI:1919717]
ENSMUSG00000024975	0.563994	5.68955	10.0983	0.00148408	0.0312237	chr19	+	53892231	53929861	NM_011050	Pdcd4	programmed cell death 4 [Source:MGI Symbol;Acc:MGI:107490]
ENSMUSG00000037605	0.562489	5.83564	8.68462	0.00320906	0.0489836	chr5	+	81310025	81796634	NM_198702	Adgrl3	adhesion G protein-coupled receptor L3 [Source:MGI Symbol;Acc:MGI:2441950]
ENSMUSG00000035615	0.560536	5.62138	6.71353	0.00956839	0.0843095	chr4	+	45184906	45285936	NM_001081172	Frmpd1	FERM and PDZ domain containing 1 [Source:MGI Symbol;Acc:MGI:2446274]
ENSMUSG00000066306	0.556027	7.41174	6.22526	0.012594	0.0954987	chr7	+	101969843	102014959	NM_133947	Numa1	nuclear mitotic apparatus protein 1 [Source:MGI Symbol;Acc:MGI:2443665]
ENSMUSG00000035900	0.554906	5.33457	6.22165	0.0126198	0.0955375	chr15	+	86057695	86137634	NM_172611	Gramd4	GRAM domain containing 4 [Source:MGI Symbol;Acc:MGI:2676308]
ENSMUSG00000038822	0.552787	3.94112	6.21148	0.0126925	0.0956662	chr10	+	45577829	45712345	NM_172473	Hace1	HECT domain and ankyrin repeat containing, E3 ubiquitin protein ligase 1 [Source:MGI Symbol;Acc:MGI:2446110]
ENSMUSG00000027639	0.551592	4.27315	8.5546	0.0034465	0.0508184	chr2	-	157135265	157097533	NM_018851	Samhd1	SAM domain and HD domain, 1 [Source:MGI Symbol;Acc:MGI:1927468]
ENSMUSG00000019951	0.550862	6.57431	8.23448	0.0041102	0.0558762	chr10	+	89744991	89819869	NM_029166	Uhrf1bp1l	UHRF1 (ICBP90) binding protein 1-like [Source:MGI Symbol;Acc:MGI:2442888]
ENSMUSG00000066551	0.549129	8.37146	7.30701	0.00686859	0.0716476	chr5	-	149053040	149046702	NM_010439	Hmgb1	high mobility group box 1 [Source:MGI Symbol;Acc:MGI:96113]
ENSMUSG00000050310	0.548366	6.30884	8.72121	0.0031453	0.0486155	chr15	+	6708381	6800398	NM_030168	Rictor	RPTOR independent companion of MTOR, complex 2 [Source:MGI Symbol;Acc:MGI:1926007]
ENSMUSG00000028560	0.546723	5.42731	7.08101	0.00779049	0.076203	chr4	+	98923810	98935543	NM_001301414	Usp1	ubiquitin specific peptidase 1 [Source:MGI Symbol;Acc:MGI:2385198]
ENSMUSG00000030691	0.546617	3.87079	7.17929	0.00737498	0.073995	chr7	+	101108781	101284405	NM_199012	Fchsd2	FCH and double SH3 domains 2 [Source:MGI Symbol;Acc:MGI:2448475]
ENSMUSG00000032898	0.545868	5.3224	8.96253	0.00275572	0.0453942	chr5	+	117976730	118010201	NM_145564	Fbxo21	F-box protein 21 [Source:MGI Symbol;Acc:MGI:1924223]
ENSMUSG00000033237	0.545253	5.72833	8.02702	0.00460847	0.058933	chr15	+	96287573	96404992	NM_175251	Arid2	AT rich interactive domain 2 (ARID, RFX-like) [Source:MGI Symbol;Acc:MGI:1924294]
ENSMUSG00000029647	0.544827	5.55817	6.62621	0.0100489	0.0860907	chr5	+	147430161	147548502	NM_028291	Pan3	PAN3 polyA specific ribonuclease subunit homolog (S. cerevisiae) [Source:MGI Symbol;Acc:MGI:1919837]
ENSMUSG00000020362	0.542288	6.27124	6.27512	0.0122445	0.0944959	chr11	-	49712723	49671503	NM_001290741	Cnot6	CCR4-NOT transcription complex, subunit 6 [Source:MGI Symbol;Acc:MGI:2144529]
ENSMUSG00000039852	0.541922	4.59114	7.03127	0.00800985	0.0771714	chr4	+	150281646	150621966	NM_001085492	Rere	arginine glutamic acid dipeptide (RE) repeats [Source:MGI Symbol;Acc:MGI:2683486]
ENSMUSG00000050567	0.541487	5.06383	7.67852	0.0055882	0.0647907	chr11	-	50292311	50255634	NM_175334	Maml1	mastermind like 1 (Drosophila) [Source:MGI Symbol;Acc:MGI:1890504]
ENSMUSG00000033014	0.541046	5.77741	9.38718	0.00218509	0.0394097	chr3	+	103279293	103358775	NM_053170	Trim33	tripartite motif-containing 33 [Source:MGI Symbol;Acc:MGI:2137357]
ENSMUSG00000022353	0.539686	6.37083	10.673	0.0010871	0.0259625	chr15	-	59082026	58941244	NM_144800	Mtss1	metastasis suppressor 1 [Source:MGI Symbol;Acc:MGI:2384818]
ENSMUSG00000032410	0.539631	5.26133	8.08579	0.00446137	0.0580651	chr9	+	95954760	96053027	NM_011916	Xrn1	5'-3' exoribonuclease 1 [Source:MGI Symbol;Acc:MGI:891964]
ENSMUSG00000040852	0.539558	6.04583	8.00248	0.00467132	0.0591977	chr17	+	84511895	84622142	NM_177606	Plekhh2	pleckstrin homology domain containing, family H (with MyTH4 domain) member 2 [Source:MGI Symbol;Acc:MGI:2146813]
ENSMUSG00000038227	0.53717	4.06429	7.08948	0.00775379	0.0761287	chr6	-	52227370	52223100	NM_010456	Hoxa9	homeobox A9 [Source:MGI Symbol;Acc:MGI:96180]
ENSMUSG00000042050	0.535814	4.04881	6.40143	0.0114028	0.0916002	chr12	-	116263025	116207050	NM_146039	Wdr60	WD repeat domain 60 [Source:MGI Symbol;Acc:MGI:2445085]
ENSMUSG00000031540	0.53537	5.91344	6.9359	0.00844826	0.07889	chr8	+	22859549	22943259	NM_001081149	Kat6a	K(lysine) acetyltransferase 6A [Source:MGI Symbol;Acc:MGI:2442415]
ENSMUSG00000003269	0.534591	6.2139	11.4314	0.000722148	0.020776	chr7	-	45814311	45806639	NM_001112701	Cyth2	cytohesin 2 [Source:MGI Symbol;Acc:MGI:1334255]
ENSMUSG00000074994	0.532899	5.39855	6.79788	0.00912659	0.0823773	chr2	-	104816696	104754795	NM_001123327	Qser1	glutamine and serine rich 1 [Source:MGI Symbol;Acc:MGI:2138986]
ENSMUSG00000001098	0.532564	7.06055	7.7988	0.00522809	0.062369	chr5	-	114380508	114363567	NM_026145	Kctd10	potassium channel tetramerisation domain containing 10 [Source:MGI Symbol;Acc:MGI:2141207]
ENSMUSG00000017929	0.532355	6.04825	7.18067	0.00736932	0.073995	chr2	-	167349183	167298444	NM_019835	B4galt5	UDP-Gal:betaGlcNAc beta 1,4-galactosyltransferase, polypeptide 5 [Source:MGI Symbol;Acc:MGI:1927169]
ENSMUSG00000027803	0.531829	8.16143	6.99758	0.00816199	0.0776707	chr3	-	57575828	57455649	NM_133784	Wwtr1	WW domain containing transcription regulator 1 [Source:MGI Symbol;Acc:MGI:1917649]
ENSMUSG00000057133	0.531588	6.24508	7.30054	0.0068934	0.071783	chr2	-	161109022	160946978	NM_173368	Chd6	chromodomain helicase DNA binding protein 6 [Source:MGI Symbol;Acc:MGI:1918639]
ENSMUSG00000047248	0.531555	5.18452	7.04403	0.00795299	0.0769847	chr7	+	100372233	100470150	NM_001017985	C2cd3	C2 calcium-dependent domain containing 3 [Source:MGI Symbol;Acc:MGI:2142166]
ENSMUSG00000061410	0.526235	6.00238	7.6001	0.0058365	0.0661808	chr8	-	121652901	121598703	NM_080855	Zcchc14	zinc finger, CCHC domain containing 14 [Source:MGI Symbol;Acc:MGI:2159407]
ENSMUSG00000054823	0.526033	5.3597	6.39295	0.0114574	0.0919006	chr8	+	25602284	25677972	NM_001001735	Whsc1l1	Wolf-Hirschhorn syndrome candidate 1-like 1 (human) [Source:MGI Symbol;Acc:MGI:2142581]
ENSMUSG00000073563	0.525794	5.91085	9.81767	0.00172843	0.0344322	chr18	+	53862113	53955684	NM_152809	Csnk1g3	casein kinase 1, gamma 3 [Source:MGI Symbol;Acc:MGI:1917675]
ENSMUSG00000052040	0.524917	5.6412	6.25538	0.0123817	0.0949621	chr7	-	63938915	63886347	NM_021366	Klf13	Kruppel-like factor 13 [Source:MGI Symbol;Acc:MGI:1354948]
ENSMUSG00000016477	0.523517	5.47759	7.8633	0.00504481	0.0613092	chr13	-	29985668	29906575	NM_001289920	E2f3	E2F transcription factor 3 [Source:MGI Symbol;Acc:MGI:1096340]
ENSMUSG00000024073	0.523225	8.4023	6.84271	0.00890036	0.0813194	chr17	+	74528295	74703356	NM_007566	Birc6	baculoviral IAP repeat-containing 6 [Source:MGI Symbol;Acc:MGI:1276108]
ENSMUSG00000016559	0.522904	8.28374	7.94077	0.00483333	0.0600368	chr11	-	116024504	116021961	NM_008211	H3f3b	H3 histone, family 3B [Source:MGI Symbol;Acc:MGI:1101768]
ENSMUSG00000030172	0.52201	6.315	7.49267	0.00619507	0.0682333	chr6	-	119848150	119570796	NM_053204	Erc1	ELKS/RAB6-interacting/CAST family member 1 [Source:MGI Symbol;Acc:MGI:2151013]
ENSMUSG00000031229	0.520551	7.51346	8.70952	0.00316552	0.0486468	chrX	-	105929403	105797615	NM_009530	Atrx	alpha thalassemia/mental retardation syndrome X-linked homolog (human) [Source:MGI Symbol;Acc:MGI:103067]
ENSMUSG00000026819	0.518634	4.29211	7.09463	0.00773154	0.0759705	chr2	-	32431119	32414487	NM_001164358	Slc25a25	solute carrier family 25 (mitochondrial carrier, phosphate carrier), member 25 [Source:MGI Symbol;Acc:MGI:1915913]
ENSMUSG00000029924	0.518301	4.17887	7.46948	0.00627537	0.0683385	chr6	-	39377675	39334773	NM_028123	Slc37a3	solute carrier family 37 (glycerol-3-phosphate transporter), member 3 [Source:MGI Symbol;Acc:MGI:1919394]
ENSMUSG00000034158	0.51468	7.9722	7.28046	0.00697086	0.0720439	chr16	+	37868389	37888858	NM_177093	Lrrc58	leucine rich repeat containing 58 [Source:MGI Symbol;Acc:MGI:2443542]
ENSMUSG00000002221	0.513921	5.07023	6.69863	0.00964868	0.084581	chr5	-	27791550	27740080	NM_018878	Paxip1	PAX interacting (with transcription-activation domain) protein 1 [Source:MGI Symbol;Acc:MGI:1890430]
ENSMUSG00000055884	0.511195	4.64372	7.35207	0.00669854	0.0707062	chr12	+	65075606	65132058	NM_178912	Fancm	Fanconi anemia, complementation group M [Source:MGI Symbol;Acc:MGI:2442306]
ENSMUSG00000061665	0.508788	6.25116	8.02903	0.00460336	0.058933	chr17	-	42876424	42792951	NM_009847	Cd2ap	CD2-associated protein [Source:MGI Symbol;Acc:MGI:1330281]
ENSMUSG00000030199	0.508015	5.48215	7.75775	0.00534825	0.0633748	chr6	+	134035700	134270158	NM_007961	Etv6	ets variant 6 [Source:MGI Symbol;Acc:MGI:109336]
ENSMUSG00000022307	0.506582	7.17307	10.6245	0.00111598	0.0262294	chr15	+	41830958	41861045	NM_001130164	Oxr1	oxidation resistance 1 [Source:MGI Symbol;Acc:MGI:2179326]
ENSMUSG00000011256	0.504966	7.00373	7.01285	0.00809268	0.0775127	chr11	+	46055992	46147343	NM_001291890	Adam19	a disintegrin and metallopeptidase domain 19 (meltrin beta) [Source:MGI Symbol;Acc:MGI:105377]
ENSMUSG00000029705	0.50218	7.09732	7.91584	0.00490037	0.0604412	chr5	-	136567248	136248135	NM_001291238	Cux1	cut-like homeobox 1 [Source:MGI Symbol;Acc:MGI:88568]
ENSMUSG00000040433	0.500859	7.20111	8.783	0.00304052	0.0477944	chr9	-	96731675	96685423	NM_175537	Zbtb38	zinc finger and BTB domain containing 38 [Source:MGI Symbol;Acc:MGI:2442866]
ENSMUSG00000050332	0.500411	4.91588	8.64112	0.0032866	0.0497048	chrX	-	95444872	95420318	NM_175179	Amer1	APC membrane recruitment 1 [Source:MGI Symbol;Acc:MGI:1919595]
ENSMUSG00000038126	0.499962	4.56935	6.2498	0.0124207	0.0951577	chr5	-	124327972	124250959	NM_001081323	Mphosph9	M-phase phosphoprotein 9 [Source:MGI Symbol;Acc:MGI:2443138]
ENSMUSG00000038005	0.498435	4.27802	7.03576	0.0079898	0.0771598	chr8	+	60890451	60907580	NM_028299	2700029M09Rik	RIKEN cDNA 2700029M09 gene [Source:MGI Symbol;Acc:MGI:1919862]
ENSMUSG00000020827	0.497793	5.72415	6.96434	0.008315	0.0782837	chr11	+	70562890	70614128	NM_001045959	Mink1	misshapen-like kinase 1 (zebrafish) [Source:MGI Symbol;Acc:MGI:1355329]
ENSMUSG00000049076	0.495419	6.30855	7.13751	0.00754879	0.0751901	chr16	-	31201238	31092413	NM_030138	Acap2	ArfGAP with coiled-coil, ankyrin repeat and PH domains 2 [Source:MGI Symbol;Acc:MGI:1925868]
ENSMUSG00000040054	0.490813	5.64652	6.114	0.0134115	0.0987581	chr10	+	128092783	128129303	NM_054078	Baz2a	bromodomain adjacent to zinc finger domain, 2A [Source:MGI Symbol;Acc:MGI:2151152]
ENSMUSG00000000276	0.490362	4.51075	6.23698	0.0125109	0.0953459	chr11	-	89060748	89037582	NM_019505	Dgke	diacylglycerol kinase, epsilon [Source:MGI Symbol;Acc:MGI:1889276]
ENSMUSG00000024077	0.487602	5.1207	6.6578	0.00987225	0.08544	chr17	-	78737196	78649913	NM_011500	Strn	striatin, calmodulin binding protein [Source:MGI Symbol;Acc:MGI:1333757]
ENSMUSG00000018199	0.487294	6.73728	6.62966	0.0100294	0.0860371	chr1	-	143777068	143750790	NM_013835	Trove2	TROVE domain family, member 2 [Source:MGI Symbol;Acc:MGI:106652]
ENSMUSG00000049657	0.487213	3.96053	7.67488	0.00559949	0.0648001	chr4	-	45012394	44991242	NM_173399	Zbtb5	zinc finger and BTB domain containing 5 [Source:MGI Symbol;Acc:MGI:1924601]
ENSMUSG00000022967	0.486626	5.78663	7.59753	0.00584482	0.0661938	chr16	+	91485238	91507441	NM_010508	Ifnar1	interferon (alpha and beta) receptor 1 [Source:MGI Symbol;Acc:MGI:107658]
ENSMUSG00000018377	0.483498	6.22576	6.50289	0.0107699	0.0888883	chr11	+	88068279	88084729	NM_016686	Vezf1	vascular endothelial zinc finger 1 [Source:MGI Symbol;Acc:MGI:1313291]
ENSMUSG00000042390	0.482565	5.28504	6.59723	0.0102138	0.0867649	chr3	+	90341654	90358120	NM_139304	Gatad2b	GATA zinc finger domain containing 2B [Source:MGI Symbol;Acc:MGI:2443225]
ENSMUSG00000024383	0.479372	6.46701	6.78308	0.00920261	0.0826165	chr18	+	32163089	32236751	NM_011946	Map3k2	mitogen-activated protein kinase kinase kinase 2 [Source:MGI Symbol;Acc:MGI:1346873]
ENSMUSG00000029505	0.476049	6.66339	7.47827	0.0062448	0.0683063	chr5	-	110770527	110664373	NM_029337	Ep400	E1A binding protein p400 [Source:MGI Symbol;Acc:MGI:1276124]
ENSMUSG00000037503	0.473307	7.4713	6.53919	0.0105523	0.0880857	chr1	-	34843065	34813226	NM_174997	Fam168b	family with sequence similarity 168, member B [Source:MGI Symbol;Acc:MGI:2448487]
ENSMUSG00000042208	0.472295	5.35277	7.73712	0.00540969	0.0637364	chr11	-	23633631	23573788	NM_027860	0610010F05Rik	RIKEN cDNA 0610010F05 gene [Source:MGI Symbol;Acc:MGI:1918925]
ENSMUSG00000027087	0.471853	7.88695	7.5037	0.00615725	0.0679784	chr2	+	83724397	83806916	NM_008402	Itgav	integrin alpha V [Source:MGI Symbol;Acc:MGI:96608]
ENSMUSG00000031902	0.471604	5.49279	8.54019	0.00347389	0.0509807	chr8	+	106059603	106130537	NM_010901	Nfatc3	nuclear factor of activated T cells, cytoplasmic, calcineurin dependent 3 [Source:MGI Symbol;Acc:MGI:103296]
ENSMUSG00000059495	0.471265	7.94621	7.46954	0.00627516	0.0683385	chr9	-	43105718	42963842	NM_027144	Arhgef12	Rho guanine nucleotide exchange factor (GEF) 12 [Source:MGI Symbol;Acc:MGI:1916882]
ENSMUSG00000023026	0.471256	5.7338	7.64599	0.00568988	0.0652963	chr15	+	100038664	100219473	NM_001159361	Dip2b	DIP2 disco-interacting protein 2 homolog B (Drosophila) [Source:MGI Symbol;Acc:MGI:2145977]
ENSMUSG00000010277	0.471153	8.42842	6.55082	0.0104836	0.0879434	chr11	+	78261752	78290623	NM_001002004	2610507B11Rik	RIKEN cDNA 2610507B11 gene [Source:MGI Symbol;Acc:MGI:1919753]
ENSMUSG00000042506	0.467121	7.77554	7.22858	0.00717518	0.0728682	chr11	-	61175055	61151785	NM_001004143	Usp22	ubiquitin specific peptidase 22 [Source:MGI Symbol;Acc:MGI:2144157]
ENSMUSG00000029772	0.464417	4.8064	6.80373	0.00909678	0.0823773	chr6	+	29768480	29912304	NM_001171000	Ahcyl2	S-adenosylhomocysteine hydrolase-like 2 [Source:MGI Symbol;Acc:MGI:1921590]
ENSMUSG00000024639	0.462893	5.69443	6.24459	0.0124574	0.0952472	chr19	+	16132831	16387463	NM_008139	Gnaq	guanine nucleotide binding protein, alpha q polypeptide [Source:MGI Symbol;Acc:MGI:95776]
ENSMUSG00000037400	0.461779	5.32933	6.4527	0.0110784	0.0902242	chr3	+	35754134	35856276	NM_029570	Atp11b	ATPase, class VI, type 11B [Source:MGI Symbol;Acc:MGI:1923545]
ENSMUSG00000026116	0.461774	5.96782	7.26479	0.00703193	0.072167	chr1	-	36939527	36792191	NM_018872	Tmem131	transmembrane protein 131 [Source:MGI Symbol;Acc:MGI:1927110]
ENSMUSG00000022329	0.460953	5.15511	6.29095	0.0121356	0.0942128	chr15	-	35155806	34875496	NM_019635	Stk3	serine/threonine kinase 3 [Source:MGI Symbol;Acc:MGI:1928487]
ENSMUSG00000069729	0.460578	6.13496	8.62176	0.00332171	0.0498937	chr17	+	4995074	5347656	NM_001085355	Arid1b	AT rich interactive domain 1B (SWI-like) [Source:MGI Symbol;Acc:MGI:1926129]
ENSMUSG00000033769	0.45953	5.22551	8.21669	0.00415068	0.0561795	chr6	-	85069513	84618487	NM_177077	Exoc6b	exocyst complex component 6B [Source:MGI Symbol;Acc:MGI:1923164]
ENSMUSG00000041997	0.458653	5.43273	10.1031	0.00148024	0.031196	chr2	-	70825728	70712407	NM_172664	Tlk1	tousled-like kinase 1 [Source:MGI Symbol;Acc:MGI:2441683]
ENSMUSG00000038909	0.454074	6.11074	8.12016	0.00437756	0.0577343	chr11	-	95310201	95274259	NM_177619	Kat7	K(lysine) acetyltransferase 7 [Source:MGI Symbol;Acc:MGI:2182799]
ENSMUSG00000000420	0.45222	6.98059	7.21394	0.00723396	0.0730405	chr18	+	24205344	24286818	NM_013814	Galnt1	UDP-N-acetyl-alpha-D-galactosamine:polypeptide N-acetylgalactosaminyltransferase 1 [Source:MGI Symbol;Acc:MGI:894693]
ENSMUSG00000067336	0.451564	7.30471	6.20625	0.01273	0.0957042	chr1	+	59763400	59879014	NM_007561	Bmpr2	bone morphogenetic protein receptor, type II (serine/threonine kinase) [Source:MGI Symbol;Acc:MGI:1095407]
ENSMUSG00000021067	0.44992	6.00276	8.14513	0.00431769	0.0576051	chr12	-	69987002	69965012	NM_022028	Sav1	salvador homolog 1 (Drosophila) [Source:MGI Symbol;Acc:MGI:1927144]
ENSMUSG00000014353	0.440371	5.22394	7.75529	0.00535554	0.0634003	chr2	+	128818118	128854261	NM_028248	Tmem87b	transmembrane protein 87B [Source:MGI Symbol;Acc:MGI:1919727]
ENSMUSG00000034109	0.440334	6.0904	6.81587	0.00903514	0.0820659	chr3	-	75956929	75875084	NM_175193	Golim4	golgi integral membrane protein 4 [Source:MGI Symbol;Acc:MGI:1920374]
ENSMUSG00000034648	0.439282	9.18847	6.2574	0.0123676	0.0949621	chr6	+	107529726	107570228	NM_008516	Lrrn1	leucine rich repeat protein 1, neuronal [Source:MGI Symbol;Acc:MGI:106038]
ENSMUSG00000027799	0.435585	6.55435	6.40985	0.0113489	0.0914641	chr3	-	56183701	55625195	NM_030595	Nbea	neurobeachin [Source:MGI Symbol;Acc:MGI:1347075]
ENSMUSG00000018548	0.435511	5.3617	6.09845	0.0135301	0.0992093	chr11	+	87127077	87220683	NM_197987	Trim37	tripartite motif-containing 37 [Source:MGI Symbol;Acc:MGI:2153072]
ENSMUSG00000040151	0.434744	7.01621	6.31657	0.0119615	0.0940229	chr3	-	144570181	144429706	NM_011828	Hs2st1	heparan sulfate 2-O-sulfotransferase 1 [Source:MGI Symbol;Acc:MGI:1346049]
ENSMUSG00000026436	0.43424	5.55524	6.28602	0.0121694	0.0943283	chr1	+	132007607	132026448	NM_007923	Elk4	ELK4, member of ETS oncogene family [Source:MGI Symbol;Acc:MGI:102853]
ENSMUSG00000025423	0.433972	6.51691	7.3199	0.00681952	0.0714951	chr18	+	77065208	77155708	NM_001164167	Pias2	protein inhibitor of activated STAT 2 [Source:MGI Symbol;Acc:MGI:1096566]
ENSMUSG00000032407	0.432248	6.69434	6.70229	0.00962893	0.084581	chr9	-	95511894	95456898	NM_001114977	U2surp	U2 snRNP-associated SURP domain containing [Source:MGI Symbol;Acc:MGI:1915208]
ENSMUSG00000030678	0.430998	5.53555	6.21074	0.0126978	0.0956662	chr7	-	127026479	127022143	NM_010772	Maz	MYC-associated zinc finger protein (purine-binding transcription factor) [Source:MGI Symbol;Acc:MGI:1338823]
ENSMUSG00000016933	0.425061	7.15746	6.56957	0.0103737	0.0875994	chr2	+	160731310	160775760	NM_021280	Plcg1	phospholipase C, gamma 1 [Source:MGI Symbol;Acc:MGI:97615]
ENSMUSG00000040363	0.413643	6.19038	6.94723	0.00839491	0.0787476	chrX	-	12080553	12036740	NM_029510	Bcor	BCL6 interacting corepressor [Source:MGI Symbol;Acc:MGI:1918708]
ENSMUSG00000058230	0.409756	7.68975	6.37897	0.011548	0.0922872	chr7	-	16614993	16493719	NM_172739	Arhgap35	Rho GTPase activating protein 35 [Source:MGI Symbol;Acc:MGI:1929494]
ENSMUSG00000066571	0.409225	6.40282	8.39757	0.00375723	0.0532425	chr7	-	34285599	34236714	NM_172741	4931406P16Rik	RIKEN cDNA 4931406P16 gene [Source:MGI Symbol;Acc:MGI:1924311]
ENSMUSG00000021109	0.396071	7.44004	6.36707	0.0116258	0.0926821	chr12	+	73907904	73947530	NM_010431	Hif1a	hypoxia inducible factor 1, alpha subunit [Source:MGI Symbol;Acc:MGI:106918]
ENSMUSG00000033228	0.394508	7.06783	6.18608	0.0128759	0.0963632	chr15	-	96460843	96411698	NM_028148	Scaf11	SR-related CTD-associated factor 11 [Source:MGI Symbol;Acc:MGI:1919443]
ENSMUSG00000021690	0.393589	5.56404	6.27636	0.0122359	0.0944959	chr13	-	93499808	93430097	NM_021310	Jmy	junction-mediating and regulatory protein [Source:MGI Symbol;Acc:MGI:1913096]
ENSMUSG00000034674	0.391093	5.53916	6.69476	0.00966965	0.084581	chr10	+	82629828	82650324	NM_011561	Tdg	thymine DNA glycosylase [Source:MGI Symbol;Acc:MGI:108247]
ENSMUSG00000069495	0.389752	5.49636	6.30492	0.0120403	0.094211	chr2	+	49451486	49551948	NM_172663	Epc2	enhancer of polycomb homolog 2 (Drosophila) [Source:MGI Symbol;Acc:MGI:1278321]
ENSMUSG00000033417	0.330987	6.59432	6.44365	0.0111349	0.0905061	chr19	-	60581023	60524696	NM_030197	Cacul1	CDK2 associated, cullin domain 1 [Source:MGI Symbol;Acc:MGI:1926082]
ENSMUSG00000027710	-0.364795	5.40005	6.44387	0.0111336	0.0905061	chr3	+	36065979	36092853	NM_172678	Acad9	acyl-Coenzyme A dehydrogenase family, member 9 [Source:MGI Symbol;Acc:MGI:1914272]
ENSMUSG00000016757	-0.365813	6.01352	7.27107	0.00700741	0.0721645	chr15	-	83595157	83575644	NM_183017	Ttll12	tubulin tyrosine ligase-like family, member 12 [Source:MGI Symbol;Acc:MGI:3039573]
ENSMUSG00000015363	-0.373021	5.48446	6.29528	0.012106	0.0942128	chr15	+	89076013	89087077	NM_026485	Trabd	TraB domain containing [Source:MGI Symbol;Acc:MGI:1915226]
ENSMUSG00000094870	-0.375781	5.934	6.08188	0.0136575	0.0997211	chr13	-	119790805	119765187	NM_001302549	Zfp131	zinc finger protein 131 [Source:MGI Symbol;Acc:MGI:1919715]
ENSMUSG00000002625	-0.385839	5.4034	6.21771	0.0126479	0.0955815	chr17	-	32350581	32321425	NM_017476	Akap8l	A kinase (PRKA) anchor protein 8-like [Source:MGI Symbol;Acc:MGI:1860606]
ENSMUSG00000054455	-0.388093	6.52534	6.55535	0.0104569	0.0879332	chr2	+	173737511	173784336	NM_019806	Vapb	vesicle-associated membrane protein, associated protein B and C [Source:MGI Symbol;Acc:MGI:1928744]
ENSMUSG00000026245	-0.398108	6.79098	7.24124	0.00712479	0.0726613	chr1	-	78488859	78417975	NM_001278075	Farsb	phenylalanyl-tRNA synthetase, beta subunit [Source:MGI Symbol;Acc:MGI:1346035]
ENSMUSG00000053565	-0.400913	7.24312	6.40234	0.011397	0.0916002	chr7	-	28981814	28971373	NM_001285942	Eif3k	eukaryotic translation initiation factor 3, subunit K [Source:MGI Symbol;Acc:MGI:1921080]
ENSMUSG00000040044	-0.40485	6.05121	7.08063	0.00779216	0.076203	chr4	-	34614944	34570796	NM_015824	Orc3	origin recognition complex, subunit 3 [Source:MGI Symbol;Acc:MGI:1354944]
ENSMUSG00000020755	-0.404987	6.321	6.47921	0.0109143	0.0893677	chr11	+	115933282	115966725	NM_020483	Sap30bp	SAP30 binding protein [Source:MGI Symbol;Acc:MGI:1927479]
ENSMUSG00000014867	-0.408209	8.3161	6.16612	0.013022	0.097045	chr2	-	26933928	26920040	NM_011512	Surf4	surfeit gene 4 [Source:MGI Symbol;Acc:MGI:98445]
ENSMUSG00000015668	-0.410417	5.44939	7.01552	0.00808061	0.0775127	chrX	-	100625935	100622908	NM_028303	Pdzd11	PDZ domain containing 11 [Source:MGI Symbol;Acc:MGI:1919871]
ENSMUSG00000028907	-0.413066	5.59284	6.29443	0.0121118	0.0942128	chr4	-	124693600	124678160	NM_026031	Utp11l	UTP11-like, U3 small nucleolar ribonucleoprotein, (yeast) [Source:MGI Symbol;Acc:MGI:1914455]
ENSMUSG00000020864	-0.41557	6.61171	6.15257	0.0131222	0.097498	chr11	+	94328001	94341841	NM_027799	Ankrd40	ankyrin repeat domain 40 [Source:MGI Symbol;Acc:MGI:1918702]
ENSMUSG00000016256	-0.418325	6.83796	8.54668	0.00346153	0.0509792	chr2	-	174439039	174427493	NM_022325	Ctsz	cathepsin Z [Source:MGI Symbol;Acc:MGI:1891190]
ENSMUSG00000024581	-0.418348	5.19035	7.00679	0.00812012	0.0775706	chr18	+	62977836	62999450	NM_028017	Napg	N-ethylmaleimide sensitive fusion protein attachment protein gamma [Source:MGI Symbol;Acc:MGI:104561]
ENSMUSG00000025940	-0.418871	6.1001	6.94461	0.00840722	0.0787476	chr1	+	16665207	16678195	NM_026392	Tmem70	transmembrane protein 70 [Source:MGI Symbol;Acc:MGI:1915068]
ENSMUSG00000034211	-0.419783	5.79913	6.13345	0.0132648	0.0982039	chr5	+	129715516	129718691	NM_025450	Mrps17	mitochondrial ribosomal protein S17 [Source:MGI Symbol;Acc:MGI:1913508]
ENSMUSG00000036810	-0.421546	4.83153	6.28786	0.0121568	0.0942891	chr8	+	88118769	88135106	NM_029074	Cnep1r1	CTD nuclear envelope phosphatase 1 regulatory subunit 1 [Source:MGI Symbol;Acc:MGI:1921981]
ENSMUSG00000002981	-0.422234	7.29679	7.84821	0.00508711	0.0615177	chr7	-	19665030	19631581	NM_019649	Clptm1	cleft lip and palate associated transmembrane protein 1 [Source:MGI Symbol;Acc:MGI:1927155]
ENSMUSG00000003184	-0.423058	5.4385	8.12431	0.00436757	0.0577312	chr7	+	44997648	45002848	NM_016849	Irf3	interferon regulatory factor 3 [Source:MGI Symbol;Acc:MGI:1859179]
ENSMUSG00000065990	-0.424212	5.98356	6.49708	0.0108052	0.0888883	chr4	+	155831351	155833130	NM_025338	Aurkaip1	aurora kinase A interacting protein 1 [Source:MGI Symbol;Acc:MGI:1913327]
ENSMUSG00000027593	-0.425077	7.69285	6.4321	0.0112076	0.0909021	chr2	+	154791096	154867245	NM_001139511	Raly	hnRNP-associated with lethal yellow [Source:MGI Symbol;Acc:MGI:97850]
ENSMUSG00000027509	-0.426354	6.2652	6.71596	0.0095554	0.0843095	chr2	+	173000117	173015739	NM_175112	Rae1	RAE1 RNA export 1 homolog (S. pombe) [Source:MGI Symbol;Acc:MGI:1913929]
ENSMUSG00000031467	-0.426726	5.64546	7.22109	0.00720521	0.0729424	chr8	+	18846277	18891361	NM_026792	Agpat5	1-acylglycerol-3-phosphate O-acyltransferase 5 (lysophosphatidic acid acyltransferase, epsilon) [Source:MGI Symbol;Acc:MGI:1196345]
ENSMUSG00000027455	-0.428394	6.69973	7.26394	0.00703527	0.072167	chr2	+	151494182	151511310	NM_198326	Nsfl1c	NSFL1 (p97) cofactor (p47) [Source:MGI Symbol;Acc:MGI:3042273]
ENSMUSG00000047694	-0.429298	5.34455	6.51624	0.0106894	0.0887364	chrX	+	98937761	98949017	NM_207633	Yipf6	Yip1 domain family, member 6 [Source:MGI Symbol;Acc:MGI:1925179]
ENSMUSG00000041765	-0.430895	4.96936	6.45933	0.0110371	0.0900066	chr14	+	121878606	122021034	NM_026861	Ubac2	ubiquitin associated domain containing 2 [Source:MGI Symbol;Acc:MGI:1916139]
ENSMUSG00000062006	-0.43124	8.15421	6.12625	0.0133189	0.0984581	chr3	-	130730337	130726831	NM_026724	Rpl34	ribosomal protein L34 [Source:MGI Symbol;Acc:MGI:1915686]
ENSMUSG00000054364	-0.431392	8.08227	6.24113	0.0124817	0.0952564	chr12	-	8499985	8497763	NM_007483	Rhob	ras homolog gene family, member B [Source:MGI Symbol;Acc:MGI:107949]
ENSMUSG00000003662	-0.431568	5.74292	6.32645	0.011895	0.093728	chr2	-	127247816	127240938	NM_025296	Ciao1	cytosolic iron-sulfur protein assembly 1 [Source:MGI Symbol;Acc:MGI:1346998]
ENSMUSG00000040822	-0.432926	4.96017	6.62247	0.01007	0.0860928	chr14	+	54686171	54690742	NM_021437	1700123O20Rik	RIKEN cDNA 1700123O20 gene [Source:MGI Symbol;Acc:MGI:1920893]
ENSMUSG00000020484	-0.433765	6.90599	7.66075	0.00564349	0.0650052	chr11	+	5520659	5525893	NM_013842	Xbp1	X-box binding protein 1 [Source:MGI Symbol;Acc:MGI:98970]
ENSMUSG00000030298	-0.434376	7.0871	6.60635	0.0101616	0.0866361	chr6	-	113740743	113728067	NM_024206	Sec13	SEC13 homolog (S. cerevisiae) [Source:MGI Symbol;Acc:MGI:99832]
ENSMUSG00000079435	-0.435721	8.02089	6.24749	0.0124369	0.0951577	chrX	+	134585654	134588056	NM_019865	Rpl36a	ribosomal protein L36A [Source:MGI Symbol;Acc:MGI:1201789]
ENSMUSG00000031446	-0.43902	7.96453	7.12645	0.00759549	0.075389	chr8	+	13105621	13147940	NM_146207	Cul4a	cullin 4A [Source:MGI Symbol;Acc:MGI:1914487]
ENSMUSG00000004394	-0.439626	6.55665	7.42324	0.00643868	0.0692227	chr11	-	6274870	6270369	NM_134020	Tmed4	transmembrane emp24 protein transport domain containing 4 [Source:MGI Symbol;Acc:MGI:1915070]
ENSMUSG00000025979	-0.440614	7.24254	6.46636	0.0109935	0.0898257	chr1	+	55131231	55154899	NM_025283	Mob4	MOB family member 4, phocein [Source:MGI Symbol;Acc:MGI:104899]
ENSMUSG00000019579	-0.441921	5.52511	6.55549	0.0104561	0.0879332	chr17	-	56183920	56175744	NM_080837	Mydgf	myeloid derived growth factor [Source:MGI Symbol;Acc:MGI:2156020]
ENSMUSG00000056962	-0.44273	5.84614	6.83541	0.00893682	0.081532	chr11	-	116843449	116837432	NM_033398	Jmjd6	jumonji domain containing 6 [Source:MGI Symbol;Acc:MGI:1858910]
ENSMUSG00000028798	-0.442839	7.34531	8.25535	0.00406321	0.0554201	chr4	-	129600648	129591960	NM_018799	Eif3i	eukaryotic translation initiation factor 3, subunit I [Source:MGI Symbol;Acc:MGI:1860763]
ENSMUSG00000058267	-0.443881	5.23038	6.21644	0.0126569	0.0955917	chr1	+	160195215	160202170	NM_025474	Mrps14	mitochondrial ribosomal protein S14 [Source:MGI Symbol;Acc:MGI:1928141]
ENSMUSG00000014313	-0.444259	7.27908	6.1413	0.013206	0.0978862	chr15	-	35938246	35931976	NM_053071	Cox6c	cytochrome c oxidase subunit VIc [Source:MGI Symbol;Acc:MGI:104614]
ENSMUSG00000026457	-0.44515	7.72361	7.50582	0.00614998	0.0679784	chr1	+	134415378	134433351	NM_028320	Adipor1	adiponectin receptor 1 [Source:MGI Symbol;Acc:MGI:1919924]
ENSMUSG00000020873	-0.448517	5.85161	7.08295	0.00778207	0.076203	chr11	+	95384692	95391776	NM_016752	Slc35b1	solute carrier family 35, member B1 [Source:MGI Symbol;Acc:MGI:1343133]
ENSMUSG00000070319	-0.449081	6.64645	8.93167	0.00280268	0.0457232	chr9	-	20898600	20894352	NM_016876	Eif3g	eukaryotic translation initiation factor 3, subunit G [Source:MGI Symbol;Acc:MGI:1858258]
ENSMUSG00000024914	-0.449523	6.68408	6.63425	0.0100036	0.0859691	chr19	-	5424979	5422811	NM_024176	Drap1	Dr1 associated protein 1 (negative cofactor 2 alpha) [Source:MGI Symbol;Acc:MGI:1913806]
ENSMUSG00000021666	-0.449548	5.39745	7.63428	0.00572694	0.0655392	chr13	+	97137978	97176451	NM_177266	Gfm2	G elongation factor, mitochondrial 2 [Source:MGI Symbol;Acc:MGI:2444783]
ENSMUSG00000024999	-0.449931	5.47628	7.4602	0.00630779	0.0685708	chr19	-	38819237	38788128	NM_021315	Noc3l	nucleolar complex associated 3 homolog (S. cerevisiae) [Source:MGI Symbol;Acc:MGI:1932610]
ENSMUSG00000032497	-0.45129	6.11839	6.59119	0.0102485	0.0868116	chr9	+	111118135	111225668	NM_027742	Lrrfip2	leucine rich repeat (in FLII) interacting protein 2 [Source:MGI Symbol;Acc:MGI:1918518]
ENSMUSG00000020289	-0.452124	5.35532	8.4694	0.00361171	0.0521968	chr11	-	32267707	32231963	NM_181569	Nprl3	nitrogen permease regulator-like 3 [Source:MGI Symbol;Acc:MGI:109258]
ENSMUSG00000049299	-0.45394	5.11148	7.22793	0.00717779	0.0728682	chr11	+	69323980	69325793	NM_001024206	Trappc1	trafficking protein particle complex 1 [Source:MGI Symbol;Acc:MGI:1098727]
ENSMUSG00000005823	-0.454362	5.20377	6.51127	0.0107193	0.0887605	chr17	-	57247641	57234914	NM_001308072	Gpr108	G protein-coupled receptor 108 [Source:MGI Symbol;Acc:MGI:1925558]
ENSMUSG00000029434	-0.454648	5.62891	7.07083	0.00783488	0.0764395	chr5	-	123573038	123528659	NM_029929	Vps33a	vacuolar protein sorting 33A (yeast) [Source:MGI Symbol;Acc:MGI:1924823]
ENSMUSG00000001100	-0.455174	6.83031	7.07308	0.00782504	0.0764038	chr11	+	78512193	78522736	NM_026389	Poldip2	polymerase (DNA-directed), delta interacting protein 2 [Source:MGI Symbol;Acc:MGI:1915061]
ENSMUSG00000032547	-0.456459	7.13993	8.38655	0.00378007	0.0533827	chr9	+	102834917	102907542	NM_013649	Ryk	receptor-like tyrosine kinase [Source:MGI Symbol;Acc:MGI:101766]
ENSMUSG00000030890	-0.457045	7.58621	7.46564	0.00628878	0.0684244	chr7	+	105736592	105742925	NM_001161724	Ilk	integrin linked kinase [Source:MGI Symbol;Acc:MGI:1195267]
ENSMUSG00000013593	-0.45749	8.29029	6.49893	0.010794	0.0888883	chr1	-	171247122	171234853	NM_153064	Ndufs2	NADH dehydrogenase (ubiquinone) Fe-S protein 2 [Source:MGI Symbol;Acc:MGI:2385112]
ENSMUSG00000012405	-0.458422	9.51622	6.55432	0.010463	0.0879332	chr14	-	18271067	18267823	NM_025586	Rpl15	ribosomal protein L15 [Source:MGI Symbol;Acc:MGI:1913730]
ENSMUSG00000047719	-0.459044	4.95358	8.08924	0.00445289	0.0580471	chr4	-	148444771	148434495	NM_027873	Ubiad1	UbiA prenyltransferase domain containing 1 [Source:MGI Symbol;Acc:MGI:1918957]
ENSMUSG00000030335	-0.459117	5.96201	6.87885	0.00872216	0.0801648	chr6	+	125192165	125195583	NM_025595	Mrpl51	mitochondrial ribosomal protein L51 [Source:MGI Symbol;Acc:MGI:1913743]
ENSMUSG00000015759	-0.459359	6.52636	7.47179	0.00626733	0.0683385	chr14	-	46788411	46775582	NM_009919	Cnih1	cornichon homolog 1 (Drosophila) [Source:MGI Symbol;Acc:MGI:1277202]
ENSMUSG00000025421	-0.461171	5.46705	8.13106	0.00435133	0.0576959	chr18	+	76944115	76972171	NM_029826	Hdhd2	haloacid dehalogenase-like hydrolase domain containing 2 [Source:MGI Symbol;Acc:MGI:1924237]
ENSMUSG00000024593	-0.462982	9.01116	6.27087	0.0122739	0.0946043	chr18	+	57133090	57297467	NM_001001979	Megf10	multiple EGF-like-domains 10 [Source:MGI Symbol;Acc:MGI:2685177]
ENSMUSG00000038845	-0.464466	7.56907	7.53968	0.00603547	0.0673262	chr11	+	95666957	95680773	NM_008831	Phb	prohibitin [Source:MGI Symbol;Acc:MGI:97572]
ENSMUSG00000028772	-0.46569	5.33089	6.22466	0.0125983	0.0954987	chr4	-	130359943	130315383	NM_153160	Zcchc17	zinc finger, CCHC domain containing 17 [Source:MGI Symbol;Acc:MGI:1919955]
ENSMUSG00000030432	-0.465729	8.25506	7.71386	0.00547983	0.0640142	chr7	+	4792874	4794562	NM_009081	Rpl28	ribosomal protein L28 [Source:MGI Symbol;Acc:MGI:101839]
ENSMUSG00000030824	-0.46588	6.50259	6.4993	0.0107917	0.0888883	chr7	-	45510406	45492874	NM_001163662	Nucb1	nucleobindin 1 [Source:MGI Symbol;Acc:MGI:97388]
ENSMUSG00000032840	-0.466264	5.00599	7.11121	0.00766033	0.0756478	chr5	+	118245227	118266093	NM_001081236	2410131K14Rik	RIKEN cDNA 2410131K14 gene [Source:MGI Symbol;Acc:MGI:1924042]
ENSMUSG00000028894	-0.466431	4.98458	7.55902	0.00597104	0.0668578	chr4	+	124741850	124801511	NM_008385	Inpp5b	inositol polyphosphate-5-phosphatase B [Source:MGI Symbol;Acc:MGI:103257]
ENSMUSG00000021288	-0.466757	7.89603	8.29075	0.00398475	0.0550015	chr12	+	111758849	111806775	NM_001025360	Klc1	kinesin light chain 1 [Source:MGI Symbol;Acc:MGI:107978]
ENSMUSG00000024772	-0.467987	7.12596	7.11876	0.00762816	0.0754341	chr19	+	6276725	6300096	NM_010119	Ehd1	EH-domain containing 1 [Source:MGI Symbol;Acc:MGI:1341878]
ENSMUSG00000059734	-0.469331	6.05122	6.77354	0.00925191	0.0826393	chr19	-	3912717	3908870	NM_144870	Ndufs8	peptidase D [Source:MGI Symbol;Acc:MGI:97542]
ENSMUSG00000025264	-0.470582	4.52967	6.08362	0.0136441	0.0997211	chrX	-	151096543	151087094	NM_175146	Tsr2	TSR2 20S rRNA accumulation [Source:MGI Symbol;Acc:MGI:1916749]
ENSMUSG00000008668	-0.470598	9.41495	6.12193	0.0133515	0.0985507	chr17	-	33955717	33951999	NM_011296	Rps18	ribosomal protein S18 [Source:MGI Symbol;Acc:MGI:98146]
ENSMUSG00000029103	-0.471025	6.42115	6.36682	0.0116274	0.0926821	chr5	-	35105766	35091501	NM_013587	Lrpap1	low density lipoprotein receptor-related protein associated protein 1 [Source:MGI Symbol;Acc:MGI:96829]
ENSMUSG00000070934	-0.471055	5.72429	8.61284	0.00333802	0.0499331	chr4	+	86575668	86577285	NM_178376	Rraga	Ras-related GTP binding A [Source:MGI Symbol;Acc:MGI:1915691]
ENSMUSG00000038722	-0.472112	6.15828	6.73974	0.00942881	0.0836157	chr5	+	145140397	145148074	NM_001008705	Bud31	BUD31 homolog (yeast) [Source:MGI Symbol;Acc:MGI:2141291]
ENSMUSG00000039048	-0.473001	5.27671	6.62855	0.0100357	0.0860371	chr9	-	35210980	35204208	NM_172291	Foxred1	FAD-dependent oxidoreductase domain containing 1 [Source:MGI Symbol;Acc:MGI:2446262]
ENSMUSG00000023150	-0.476595	8.58494	6.59513	0.0102258	0.0867649	chr1	+	151344477	151364422	NM_054102	Ivns1abp	influenza virus NS1A binding protein [Source:MGI Symbol;Acc:MGI:2152389]
ENSMUSG00000018286	-0.478448	7.46892	6.11001	0.0134418	0.0988492	chr11	+	70525386	70527649	NM_008946	Psmb6	proteasome (prosome, macropain) subunit, beta type 6 [Source:MGI Symbol;Acc:MGI:104880]
ENSMUSG00000032171	-0.479371	6.11753	8.16245	0.00427665	0.0571961	chr9	+	20652130	20666584	NM_023371	Pin1	protein (peptidyl-prolyl cis/trans isomerase) NIMA-interacting 1 [Source:MGI Symbol;Acc:MGI:1346036]
ENSMUSG00000022365	-0.481357	6.95098	6.60165	0.0101884	0.0867331	chr15	-	57892418	57869502	NM_024207	Derl1	Der1-like domain family, member 1 [Source:MGI Symbol;Acc:MGI:1915069]
ENSMUSG00000025413	-0.482408	5.80958	7.88839	0.00497531	0.0610006	chr4	-	106678944	106662256	NM_001172073	Ttc4	tetratricopeptide repeat domain 4 [Source:MGI Symbol;Acc:MGI:1919604]
ENSMUSG00000029238	-0.483324	7.14432	7.82958	0.00513981	0.0618527	chr5	-	76304792	76209868	NM_001305222	Clock	circadian locomotor output cycles kaput [Source:MGI Symbol;Acc:MGI:99698]
ENSMUSG00000055239	-0.486269	7.00786	6.42891	0.0112277	0.0909021	chr6	-	72899979	72841114	NM_019715	Kcmf1	potassium channel modulatory factor 1 [Source:MGI Symbol;Acc:MGI:1921537]
ENSMUSG00000063931	-0.487148	6.69017	6.60321	0.0101795	0.0867293	chr7	+	34912379	35044710	NM_008820	Pepd	peptidase D [Source:MGI Symbol;Acc:MGI:97542]
ENSMUSG00000057788	-0.488554	5.48995	9.74989	0.00179334	0.0352149	chr8	-	70302489	70292866	NM_001024922	Ddx49	DEAD (Asp-Glu-Ala-Asp) box polypeptide 49 [Source:MGI Symbol;Acc:MGI:2136689]
ENSMUSG00000060938	-0.488779	9.26774	6.58283	0.0102967	0.0870679	chr11	+	68901583	68904534	NM_009080	Rpl26	ribosomal protein L26 [Source:MGI Symbol;Acc:MGI:106022]
ENSMUSG00000039316	-0.489377	4.89651	6.77584	0.00924	0.0826393	chr17	-	50190674	49992257	NM_181397	Rftn1	raftlin lipid raft linker 1 [Source:MGI Symbol;Acc:MGI:1923688]
ENSMUSG00000024359	-0.489726	9.66567	6.47673	0.0109296	0.0894248	chr18	-	34954357	34937414	NM_010481	Hspa9	heat shock protein 9 [Source:MGI Symbol;Acc:MGI:96245]
ENSMUSG00000039065	-0.48977	4.20049	6.26257	0.0123315	0.0949278	chr15	+	31602118	31617535	NM_026546	Fam173b	family with sequence similarity 173, member B [Source:MGI Symbol;Acc:MGI:1915323]
ENSMUSG00000046330	-0.489826	8.86657	6.63945	0.00997447	0.0858693	chr1	+	72711260	72713809	NM_009084	Rpl37a	ribosomal protein L37a [Source:MGI Symbol;Acc:MGI:98068]
ENSMUSG00000090733	-0.492835	8.34031	6.7469	0.00939105	0.0835611	chr3	-	90213623	90212671	NR_033727	Rps27	ribosomal protein S27 [Source:MGI Symbol;Acc:MGI:1888676]
ENSMUSG00000045410	-0.495586	4.3153	6.4311	0.0112139	0.0909021	chr13	-	4609174	4592490	NM_018859	Akr1e1	aldo-keto reductase family 1, member E1 [Source:MGI Symbol;Acc:MGI:1914758]
ENSMUSG00000022677	-0.496007	5.49196	6.22797	0.0125748	0.0954987	chr16	-	14317375	14299244	NM_025345	Fopnl	Fgfr1op N-terminal like [Source:MGI Symbol;Acc:MGI:1913336]
ENSMUSG00000028757	-0.496349	7.30656	8.87267	0.00289471	0.0466889	chr4	+	138304730	138312628	NM_007838	Ddost	dolichyl-di-phosphooligosaccharide-protein glycotransferase [Source:MGI Symbol;Acc:MGI:1194508]
ENSMUSG00000048277	-0.496984	5.89321	6.65607	0.00988188	0.08544	chr11	+	117809668	117814283	NM_009304	Syngr2	synaptogyrin 2 [Source:MGI Symbol;Acc:MGI:1328324]
ENSMUSG00000026926	-0.497444	7.37581	9.56767	0.00198034	0.0377485	chr2	+	26389339	26397122	NM_173180	Pmpca	peptidase (mitochondrial processing) alpha [Source:MGI Symbol;Acc:MGI:1918568]
ENSMUSG00000031533	-0.497462	4.72332	6.51454	0.0106996	0.0887364	chr8	+	22411340	22429665	NM_020560	Mrps31	mitochondrial ribosomal protein S31 [Source:MGI Symbol;Acc:MGI:1913153]
ENSMUSG00000023971	-0.497616	5.08794	7.65737	0.00565408	0.0650666	chr17	-	46674255	46667458	NM_144857	Rrp36	ribosomal RNA processing 36 homolog (S. cerevisiae) [Source:MGI Symbol;Acc:MGI:2385053]
ENSMUSG00000018770	-0.498365	8.43278	6.66465	0.0098344	0.0853437	chr2	-	73911325	73908447	NM_001301721	Atp5g3	ATP synthase, H+ transporting, mitochondrial F0 complex, subunit C3 (subunit 9) [Source:MGI Symbol;Acc:MGI:2442035]
ENSMUSG00000023942	-0.498619	8.20397	7.34001	0.00674363	0.07094	chr17	-	45592575	45585200	NM_022880	Slc29a1	solute carrier family 29 (nucleoside transporters), member 1 [Source:MGI Symbol;Acc:MGI:1927073]
ENSMUSG00000026895	-0.499779	6.07819	6.20573	0.0127337	0.0957042	chr2	-	36049406	36036326	NM_026703	Ndufa8	NADH dehydrogenase (ubiquinone) 1 alpha subcomplex, 8 [Source:MGI Symbol;Acc:MGI:1915625]
ENSMUSG00000002660	-0.499967	5.07913	7.00515	0.00812757	0.0775819	chr17	+	56990264	56996371	NM_017393	Clpp	caseinolytic mitochondrial matrix peptidase proteolytic subunit [Source:MGI Symbol;Acc:MGI:1858213]
ENSMUSG00000039737	-0.500204	4.67932	6.9876	0.00820763	0.0778148	chr5	-	136198963	136178127	NM_025774	Prkrip1	Prkr interacting protein 1 (IL11 inducible) [Source:MGI Symbol;Acc:MGI:1914051]
ENSMUSG00000071014	-0.500296	5.92323	6.33373	0.0118463	0.0936336	chr4	-	40279421	40270591	NM_001033305	Ndufb6	NADH dehydrogenase (ubiquinone) 1 beta subcomplex, 6 [Source:MGI Symbol;Acc:MGI:2684983]
ENSMUSG00000028964	-0.501798	6.57503	8.74039	0.00311237	0.0486155	chr4	-	150909926	150897133	NM_020569	Park7	Parkinson disease (autosomal recessive, early onset) 7 [Source:MGI Symbol;Acc:MGI:2135637]
ENSMUSG00000060477	-0.502283	3.97267	7.12557	0.00759923	0.075389	chr6	+	113638467	113695009	NM_172161	Irak2	interleukin-1 receptor-associated kinase 2 [Source:MGI Symbol;Acc:MGI:2429603]
ENSMUSG00000001508	-0.503147	6.53279	6.35749	0.0116887	0.092991	chr11	-	94976327	94962791	NM_009161	Sgca	sarcoglycan, alpha (dystrophin-associated glycoprotein) [Source:MGI Symbol;Acc:MGI:894698]
ENSMUSG00000049957	-0.503287	4.97504	7.26707	0.00702302	0.0721645	chr11	+	120458115	120464358	NM_152807	Ccdc137	coiled-coil domain containing 137 [Source:MGI Symbol;Acc:MGI:1914541]
ENSMUSG00000071456	-0.503317	4.80472	7.40005	0.00652222	0.0697376	chr12	-	3427011	3403878	NR_030694	1110002L01Rik	RIKEN cDNA 1110002L01 gene [Source:MGI Symbol;Acc:MGI:1915821]
ENSMUSG00000040952	-0.503734	9.04524	6.27581	0.0122397	0.0944959	chr7	+	24884714	24889806	NM_023133	Rps19	ribosomal protein S19 [Source:MGI Symbol;Acc:MGI:1333780]
ENSMUSG00000033379	-0.50408	6.32324	6.4204	0.0112817	0.0912792	chr4	-	117887329	117884326	NM_033617	Atp6v0b	ATPase, H+ transporting, lysosomal V0 subunit B [Source:MGI Symbol;Acc:MGI:1890510]
ENSMUSG00000075701	-0.504303	5.30526	6.80891	0.00907042	0.0822053	chr7	+	66079649	66089412	NM_024439	Vimp	VCP-interacting membrane protein [Source:MGI Symbol;Acc:MGI:95994]
ENSMUSG00000034203	-0.504849	4.96662	7.08415	0.00777685	0.076203	chr6	-	91473423	91464276	NM_133928	Chchd4	coiled-coil-helix-coiled-coil-helix domain containing 4 [Source:MGI Symbol;Acc:MGI:1919420]
ENSMUSG00000024304	-0.505305	9.12029	7.02299	0.00804697	0.0773492	chr18	-	16809246	16588877	NM_007664	Cdh2	cadherin 2 [Source:MGI Symbol;Acc:MGI:88355]
ENSMUSG00000026889	-0.505891	6.28249	6.82364	0.00899592	0.0819321	chr2	-	36136773	36116079	NM_001159635	Rbm18	RNA binding motif protein 18 [Source:MGI Symbol;Acc:MGI:1915139]
ENSMUSG00000042380	-0.506135	4.65369	6.5607	0.0104255	0.0879169	chr4	+	127243784	127247809	NM_030252	Smim12	small integral membrane protein 12 [Source:MGI Symbol;Acc:MGI:1933141]
ENSMUSG00000032380	-0.506362	6.27993	8.73213	0.00312651	0.0486155	chr9	+	66158223	66272242	NM_010019	Dapk2	death-associated protein kinase 2 [Source:MGI Symbol;Acc:MGI:1341297]
ENSMUSG00000022043	-0.506553	8.85915	6.26534	0.0123123	0.0948414	chr14	+	66297031	66311424	NM_029979	Trim35	tripartite motif-containing 35 [Source:MGI Symbol;Acc:MGI:1914104]
ENSMUSG00000028830	-0.507069	5.91731	7.38848	0.00656428	0.0698409	chr4	+	126753770	126870070	NM_001035526	AU040320	expressed sequence AU040320 [Source:MGI Symbol;Acc:MGI:2140475]
ENSMUSG00000040354	-0.507463	7.55264	9.56134	0.00198718	0.0377626	chr10	-	127311786	127296221	NM_001003913	Mars	methionine-tRNA synthetase [Source:MGI Symbol;Acc:MGI:1345633]
ENSMUSG00000028383	-0.508754	5.10965	7.95456	0.00479664	0.0599386	chr4	+	59581563	59618689	NM_024255	Hsdl2	hydroxysteroid dehydrogenase like 2 [Source:MGI Symbol;Acc:MGI:1919729]
ENSMUSG00000026277	-0.509549	7.34786	9.00191	0.00269697	0.0450398	chr1	-	93635722	93619751	NM_021537	Stk25	serine/threonine kinase 25 (yeast) [Source:MGI Symbol;Acc:MGI:1891699]
ENSMUSG00000025917	-0.509845	6.74809	8.27142	0.0040274	0.0552578	chr1	-	10038127	10024601	NM_001277101	Cops5	COP9 (constitutive photomorphogenic) homolog, subunit 5 (Arabidopsis thaliana) [Source:MGI Symbol;Acc:MGI:1349415]
ENSMUSG00000027131	-0.510221	5.72809	6.29965	0.0120762	0.0942128	chr2	-	112368027	112363011	NM_026519	Emc4	ER membrane protein complex subunit 4 [Source:MGI Symbol;Acc:MGI:1915282]
ENSMUSG00000029913	-0.511589	4.71236	7.70392	0.00551011	0.0641257	chr6	+	65778988	65936373	NM_027547	Prdm5	PR domain containing 5 [Source:MGI Symbol;Acc:MGI:1918029]
ENSMUSG00000028986	-0.512106	5.71607	6.82272	0.00900054	0.0819321	chr5	+	24100605	24160785	NM_026448	Klhl7	kelch-like 7 [Source:MGI Symbol;Acc:MGI:1196453]
ENSMUSG00000020781	-0.513817	3.95178	6.67877	0.0097568	0.0848814	chr11	+	115814724	115823094	NM_029557	Tsen54	tRNA splicing endonuclease 54 homolog (S. cerevisiae) [Source:MGI Symbol;Acc:MGI:1923515]
ENSMUSG00000040287	-0.514875	6.8308	7.28486	0.00695381	0.0719879	chr10	+	127501717	127508815	NM_177707	Stac3	SH3 and cysteine rich domain 3 [Source:MGI Symbol;Acc:MGI:3606571]
ENSMUSG00000030879	-0.515133	5.69832	8.18812	0.00421657	0.0567608	chr7	-	105811099	105806658	NM_025301	Mrpl17	mitochondrial ribosomal protein L17 [Source:MGI Symbol;Acc:MGI:1351608]
ENSMUSG00000034345	-0.515826	5.80878	6.65805	0.00987087	0.08544	chr17	+	6079786	6086517	NM_181392	Gtf2h5	general transcription factor IIH, polypeptide 5 [Source:MGI Symbol;Acc:MGI:107227]
ENSMUSG00000034667	-0.516319	7.81438	6.47923	0.0109142	0.0893677	chr10	-	121626316	121587380	NM_001081056	Xpot	exportin, tRNA (nuclear export receptor for tRNAs) [Source:MGI Symbol;Acc:MGI:1920442]
ENSMUSG00000020954	-0.51685	8.51373	6.29299	0.0121216	0.0942128	chr12	-	51691914	51608541	NM_052973	Strn3	striatin, calmodulin binding protein 3 [Source:MGI Symbol;Acc:MGI:2151064]
ENSMUSG00000068329	-0.517851	6.14283	9.83363	0.0017135	0.0342743	chr6	-	83054571	83051266	NM_019752	Htra2	HtrA serine peptidase 2 [Source:MGI Symbol;Acc:MGI:1928676]	locates to mitochondria and ER / participates in apoptosis induction / parkinson
ENSMUSG00000006638	-0.518249	3.92034	6.75369	0.00935542	0.0833232	chr5	+	30950066	30955091	NR_003522	Abhd1	abhydrolase domain containing 1 [Source:MGI Symbol;Acc:MGI:1931013]
ENSMUSG00000036850	-0.518402	4.85186	6.3852	0.0115076	0.0920233	chr2	-	24975098	24974117	NM_001031808	Mrpl41	mitochondrial ribosomal protein L41 [Source:MGI Symbol;Acc:MGI:1333816]
ENSMUSG00000004667	-0.518539	5.78674	8.01212	0.00464654	0.0590774	chr10	-	80039795	80035949	NM_025554	Polr2e	polymerase (RNA) II (DNA directed) polypeptide E [Source:MGI Symbol;Acc:MGI:1913670]
ENSMUSG00000090841	-0.51893	8.77073	6.50212	0.0107746	0.0888883	chr10	-	128493875	128490860	NM_010860	Myl6	myosin, light polypeptide 6, alkali, smooth muscle and non-muscle [Source:MGI Symbol;Acc:MGI:109318]
ENSMUSG00000029071	-0.519876	7.34347	6.64336	0.00995262	0.0858006	chr4	+	155847402	155859303	NM_001302342	Dvl1	dishevelled, dsh homolog 1 (Drosophila) [Source:MGI Symbol;Acc:MGI:94941]
ENSMUSG00000032786	-0.520686	6.04798	10.021	0.00154762	0.0320697	chr9	-	106247730	106233455	NM_001291835	Alas1	aminolevulinic acid synthase 1 [Source:MGI Symbol;Acc:MGI:87989]
ENSMUSG00000032475	-0.520966	5.77385	7.94066	0.00483361	0.0600368	chr9	-	100546134	100492293	NM_010878	Nck1	non-catalytic region of tyrosine kinase adaptor protein 1 [Source:MGI Symbol;Acc:MGI:109601]
ENSMUSG00000025348	-0.521221	10.6046	6.31311	0.0119848	0.094136	chr10	+	128933813	128958277	NM_008398	Itga7	integrin alpha 7 [Source:MGI Symbol;Acc:MGI:102700]
ENSMUSG00000055839	-0.526072	7.29407	6.93781	0.00843924	0.07889	chr17	-	23829109	23824740	NM_026305	Tceb2	transcription elongation factor B (SIII), polypeptide 2 [Source:MGI Symbol;Acc:MGI:1914923]
ENSMUSG00000022204	-0.527615	5.12565	8.94257	0.002786	0.0456498	chr14	+	55015454	55024135	NM_026890	Ngdn	neuroguidin, EIF4E binding protein [Source:MGI Symbol;Acc:MGI:1916216]
ENSMUSG00000024856	-0.529042	5.8347	6.29764	0.0120899	0.0942128	chr19	+	4097182	4099017	NM_026373	Cdk2ap2	CDK2-associated protein 2 [Source:MGI Symbol;Acc:MGI:1098779]
ENSMUSG00000075486	-0.529163	4.13009	7.57424	0.00592084	0.066637	chr14	-	101640686	101633766	NM_001033132	Commd6	COMM domain containing 6 [Source:MGI Symbol;Acc:MGI:1913450]
ENSMUSG00000036819	-0.530919	5.11301	7.03024	0.00801445	0.0771714	chr11	+	59450045	59458473	NM_178659	Jmjd4	jumonji domain containing 4 [Source:MGI Symbol;Acc:MGI:2144404]
ENSMUSG00000028093	-0.530927	5.09133	6.09755	0.0135369	0.0992093	chr3	+	97158777	97176574	NM_019800	Acp6	acid phosphatase 6, lysophosphatidic [Source:MGI Symbol;Acc:MGI:1931010]
ENSMUSG00000024732	-0.531868	5.59764	6.70576	0.00961022	0.0845576	chr19	-	10949266	10941481	NM_023731	Ccdc86	coiled-coil domain containing 86 [Source:MGI Symbol;Acc:MGI:1277220]
ENSMUSG00000021597	-0.531897	6.0844	7.20595	0.00726625	0.0732606	chr13	-	77135473	77043088	NM_134071	Ankrd32	ankyrin repeat domain 32 [Source:MGI Symbol;Acc:MGI:2145448]
ENSMUSG00000040018	-0.532211	5.80902	9.07263	0.00259464	0.0439857	chr19	-	43753000	43733254	NM_144874	Cox15	cytochrome c oxidase assembly protein 15 [Source:MGI Symbol;Acc:MGI:1920112]
ENSMUSG00000050552	-0.532813	4.52888	7.1023	0.00769853	0.0757665	chr5	+	138255482	138259395	NM_001081108	Lamtor4	late endosomal/lysosomal adaptor, MAPK and MTOR activator 4 [Source:MGI Symbol;Acc:MGI:1913346]
ENSMUSG00000063457	-0.533538	8.86796	7.85416	0.00507039	0.0614959	chr10	+	80292453	80294114	NM_009091	Rps15	ribosomal protein S15 [Source:MGI Symbol;Acc:MGI:98117]
ENSMUSG00000016257	-0.533824	6.72798	8.38687	0.00377942	0.0533827	chr2	-	174473081	174465067	NM_025531	Slmo2	slowmo homolog 2 (Drosophila) [Source:MGI Symbol;Acc:MGI:1913640]
ENSMUSG00000028397	-0.534519	5.73058	8.03148	0.00459713	0.058933	chr4	+	74242497	74405860	NM_001172095	Kdm4c	lysine (K)-specific demethylase 4C [Source:MGI Symbol;Acc:MGI:1924054]
ENSMUSG00000012848	-0.535053	9.45119	7.99761	0.0046839	0.059248	chr7	+	12922290	12926686	NM_009095	Rps5	ribosomal protein S5 [Source:MGI Symbol;Acc:MGI:1097682]
ENSMUSG00000029198	-0.536133	6.46981	7.15235	0.00748658	0.0748113	chr5	+	36464998	36474080	NM_024478	Grpel1	GrpE-like 1, mitochondrial [Source:MGI Symbol;Acc:MGI:1334417]
ENSMUSG00000023951	-0.536242	6.76273	7.02161	0.00805317	0.0773492	chr17	-	46031815	46016993	NM_001287058	Vegfa	vascular endothelial growth factor A [Source:MGI Symbol;Acc:MGI:103178]
ENSMUSG00000030965	-0.536592	6.38259	6.76792	0.00928111	0.0827805	chr7	+	132859225	132885111	NM_198017	Fam175b	family with sequence similarity 175, member B [Source:MGI Symbol;Acc:MGI:1926116]
ENSMUSG00000023004	-0.537477	9.45522	6.24735	0.012438	0.0951577	chr15	-	98934565	98931425	NM_011654	Tuba1b	tubulin, alpha 1B [Source:MGI Symbol;Acc:MGI:107804]
ENSMUSG00000023010	-0.538158	8.48833	11.1035	0.000861645	0.0230225	chr15	+	99392882	99410049	NM_026669	Tmbim6	transmembrane BAX inhibitor motif containing 6 [Source:MGI Symbol;Acc:MGI:99682]
ENSMUSG00000028057	-0.538347	5.27541	8.40764	0.00373648	0.0530898	chr3	+	88716838	88729727	NM_009069	Rit1	Ras-like without CAAX 1 [Source:MGI Symbol;Acc:MGI:108053]
ENSMUSG00000040548	-0.538675	5.491	7.43813	0.00638561	0.0689924	chr11	-	106612930	106502147	NM_198292	Tex2	testis expressed gene 2 [Source:MGI Symbol;Acc:MGI:102465]
ENSMUSG00000031960	-0.538944	8.73055	8.001	0.00467514	0.0591977	chr8	+	111033902	111057664	NM_146217	Aars	alanyl-tRNA synthetase [Source:MGI Symbol;Acc:MGI:2384560]
ENSMUSG00000039105	-0.539887	7.16138	8.31446	0.00393307	0.054568	chr4	+	63544772	63550750	NM_024173	Atp6v1g1	ATPase, H+ transporting, lysosomal V1 subunit G1 [Source:MGI Symbol;Acc:MGI:1913540]
ENSMUSG00000024944	-0.540174	5.03884	7.22578	0.00718641	0.0728682	chr19	-	6141406	6134383	NM_019722	Arl2	ADP-ribosylation factor-like 2 [Source:MGI Symbol;Acc:MGI:1928393]
ENSMUSG00000060904	-0.540336	7.15357	8.92875	0.00280717	0.0457232	chr10	+	88731068	88744094	NM_025859	Arl1	ADP-ribosylation factor-like 1 [Source:MGI Symbol;Acc:MGI:99436]
ENSMUSG00000025037	-0.540547	5.31457	7.31477	0.006839	0.0715833	chrX	+	16619698	16687818	NM_173740	Maoa	monoamine oxidase A [Source:MGI Symbol;Acc:MGI:96915]
ENSMUSG00000036306	-0.54148	5.44617	6.54636	0.0105099	0.0879434	chr8	-	69140953	69135503	NM_199364	Lzts1	leucine zipper, putative tumor suppressor 1 [Source:MGI Symbol;Acc:MGI:2684762]
ENSMUSG00000028461	-0.542276	4.28161	6.35843	0.0116825	0.092991	chr4	+	43493362	43495921	NM_001037913	Ccdc107	coiled-coil domain containing 107 [Source:MGI Symbol;Acc:MGI:1913423]
ENSMUSG00000037824	-0.5426	6.53542	7.13247	0.00757002	0.0753409	chr14	-	40966807	40906445	NM_145928	Tspan14	tetraspanin 14 [Source:MGI Symbol;Acc:MGI:1196325]
ENSMUSG00000049755	-0.543214	4.94454	7.95611	0.00479254	0.0599386	chr11	-	58323323	58315124	NM_001256519	Zfp672	zinc finger protein 672 [Source:MGI Symbol;Acc:MGI:2442105]
ENSMUSG00000001127	-0.543516	6.59329	8.6903	0.00319907	0.0489798	chrX	+	20848543	20860519	NM_009703	Araf	v-raf murine sarcoma 3611 viral oncogene homolog [Source:MGI Symbol;Acc:MGI:88065]
ENSMUSG00000024357	-0.544015	4.94044	7.12139	0.00761695	0.0754341	chr18	-	35498925	35266400	NM_030749	Sil1	endoplasmic reticulum chaperone SIL1 homolog (S. cerevisiae) [Source:MGI Symbol;Acc:MGI:1932040]
ENSMUSG00000049760	-0.545342	5.81354	6.11977	0.0133678	0.0986127	chr17	-	56609771	56607452	NM_153152	2410015M20Rik	RIKEN cDNA 2410015M20 gene [Source:MGI Symbol;Acc:MGI:2442174]
ENSMUSG00000031839	-0.545653	6.74448	8.43325	0.00368422	0.0526298	chr8	+	119344538	119348927	NM_024219	Hsbp1	heat shock factor binding protein 1 [Source:MGI Symbol;Acc:MGI:1915446]
ENSMUSG00000031231	-0.547456	7.33167	6.65121	0.00990883	0.0856021	chrX	+	106015700	106022450	NM_025379	Cox7b	cytochrome c oxidase subunit VIIb [Source:MGI Symbol;Acc:MGI:1913392]
ENSMUSG00000006024	-0.547868	7.32681	10.8703	0.000977211	0.0248746	chr7	+	16098458	16117975	NM_025898	Napa	N-ethylmaleimide sensitive fusion protein attachment protein alpha [Source:MGI Symbol;Acc:MGI:104563]
ENSMUSG00000022241	-0.548435	7.69817	11.1852	0.000824537	0.0227179	chr15	-	11399658	11383663	NM_033074	Tars	threonyl-tRNA synthetase [Source:MGI Symbol;Acc:MGI:106314]
ENSMUSG00000024735	-0.549075	8.09087	9.52017	0.00203225	0.0381503	chr19	+	10895231	10905532	NM_134129	Prpf19	PRP19/PSO4 pre-mRNA processing factor 19 homolog (S. cerevisiae) [Source:MGI Symbol;Acc:MGI:106247]
ENSMUSG00000037049	-0.549655	5.88973	6.67694	0.00976682	0.0849089	chr7	+	105554360	105558388	NM_011421	Smpd1	sphingomyelin phosphodiesterase 1, acid lysosomal [Source:MGI Symbol;Acc:MGI:98325]
ENSMUSG00000054452	-0.550247	7.89815	7.2143	0.00723249	0.0730405	chr10	+	81559494	81566362	NM_001276288	Aes	amino-terminal enhancer of split [Source:MGI Symbol;Acc:MGI:95806]
ENSMUSG00000031985	-0.550561	7.08221	7.37402	0.00661727	0.0700875	chr8	+	124863033	124890057	NM_010322	Gnpat	glyceronephosphate O-acyltransferase [Source:MGI Symbol;Acc:MGI:1343460]
ENSMUSG00000020921	-0.550833	4.38615	8.01	0.00465196	0.0590856	chr11	-	102156404	102152546	NM_029649	Tmem101	transmembrane protein 101 [Source:MGI Symbol;Acc:MGI:1923797]
ENSMUSG00000027523	-0.551229	10.7863	8.09822	0.00443086	0.0579432	chr2	+	174284320	174346744	NM_022000	Gnas	GNAS (guanine nucleotide binding protein, alpha stimulating) complex locus [Source:MGI Symbol;Acc:MGI:95777]
ENSMUSG00000041939	-0.551428	4.27721	7.57658	0.00591316	0.0666227	chr5	+	114444286	114460477	NM_001306205	Mvk	mevalonate kinase [Source:MGI Symbol;Acc:MGI:107624]
ENSMUSG00000039611	-0.553912	5.11916	8.33682	0.00388495	0.0542498	chr4	-	49597876	49584506	NM_025944	Tmem246	transmembrane protein 246 [Source:MGI Symbol;Acc:MGI:1914313]
ENSMUSG00000025532	-0.554496	4.67605	7.43251	0.00640559	0.0691223	chr5	+	130029290	130060789	NM_007761	Crcp	calcitonin gene-related peptide-receptor component protein [Source:MGI Symbol;Acc:MGI:1100818]
ENSMUSG00000031818	-0.555061	8.57659	7.49079	0.00620154	0.0682333	chr8	+	120668222	120674207	NM_009941	Cox4i1	cytochrome c oxidase subunit IV isoform 1 [Source:MGI Symbol;Acc:MGI:88473]
ENSMUSG00000028292	-0.555593	4.89859	9.50547	0.00204861	0.0381676	chr4	+	34614957	34660167	NM_181406	Rars2	arginyl-tRNA synthetase 2, mitochondrial [Source:MGI Symbol;Acc:MGI:1923596]
ENSMUSG00000033684	-0.558115	6.60958	8.86186	0.00291191	0.0467572	chr1	-	155812889	155778158	NM_001024945	Qsox1	quiescin Q6 sulfhydryl oxidase 1 [Source:MGI Symbol;Acc:MGI:1330818]
ENSMUSG00000022898	-0.559666	6.47839	10.0583	0.00151663	0.0317466	chr16	-	94526830	94497783	NM_007834	Dscr3	Down syndrome critical region gene 3 [Source:MGI Symbol;Acc:MGI:1206040]
ENSMUSG00000045128	-0.561262	9.12766	9.15693	0.00247778	0.0427901	chr8	-	70897443	70894722	NM_029751	Rpl18a	ribosomal protein L18A [Source:MGI Symbol;Acc:MGI:1924058]
ENSMUSG00000026203	-0.561602	5.84741	6.29147	0.012132	0.0942128	chr1	+	75236406	75245688	NM_001159883	Dnajb2	DnaJ (Hsp40) homolog, subfamily B, member 2 [Source:MGI Symbol;Acc:MGI:1928739]
ENSMUSG00000020520	-0.563821	6.33288	10.7204	0.00105962	0.0257534	chr11	+	57645442	57787514	NM_134189	Galnt10	UDP-N-acetyl-alpha-D-galactosamine:polypeptide N-acetylgalactosaminyltransferase 10 [Source:MGI Symbol;Acc:MGI:1890480]
ENSMUSG00000002342	-0.564592	6.15336	7.06324	0.00786817	0.0765702	chr8	+	70172405	70183681	NM_145597	Tmem161a	transmembrane protein 161A [Source:MGI Symbol;Acc:MGI:2384577]
ENSMUSG00000059534	-0.565488	6.57185	6.66267	0.0098453	0.0853513	chr11	-	4704342	4701973	NM_197979	Uqcr10	ubiquinol-cytochrome c reductase, complex III subunit X [Source:MGI Symbol;Acc:MGI:1913402]
ENSMUSG00000059923	-0.56567	6.71781	10.2245	0.00138588	0.0305067	chr11	-	115708597	115644045	NM_008163	Grb2	growth factor receptor bound protein 2 [Source:MGI Symbol;Acc:MGI:95805]
ENSMUSG00000061111	-0.565687	5.3357	8.04486	0.00456329	0.0589274	chr11	-	120549727	120542888	NM_001033231	Fam195b	family with sequence similarity 195, member B [Source:MGI Symbol;Acc:MGI:2384752]
ENSMUSG00000066235	-0.566348	4.17349	6.23698	0.012511	0.0953459	chr9	-	121996026	121981606	NM_001289559	Pomgnt2	protein O-linked mannose beta 1,4-N-acetylglucosaminyltransferase 2 [Source:MGI Symbol;Acc:MGI:2143424]
ENSMUSG00000046351	-0.566508	6.47648	6.86462	0.00879189	0.0806048	chr13	-	23369208	23353103	NM_172586	Zfp322a	zinc finger protein 322A [Source:MGI Symbol;Acc:MGI:2442566]
ENSMUSG00000002102	-0.567867	8.47404	7.48452	0.00622315	0.0683063	chr2	+	91054009	91059432	NM_008948	Psmc3	proteasome (prosome, macropain) 26S subunit, ATPase 3 [Source:MGI Symbol;Acc:MGI:1098754]
ENSMUSG00000031171	-0.568223	4.49883	8.40696	0.00373787	0.0530898	chrX	-	8252406	8238668	NM_133991	Ftsj1	FtsJ homolog 1 (E. coli) [Source:MGI Symbol;Acc:MGI:1859648]
ENSMUSG00000038274	-0.56976	8.43119	8.27472	0.00402008	0.0552578	chr19	+	6057888	6059524	NM_007990	Fau	Finkel-Biskis-Reilly murine sarcoma virus (FBR-MuSV) ubiquitously expressed (fox derived) [Source:MGI Symbol;Acc:MGI:102547]
ENSMUSG00000071657	-0.570679	3.74449	7.26698	0.00702336	0.0721645	chr19	+	8840519	8848666	NM_001290823	Bscl2	Berardinelli-Seip congenital lipodystrophy 2 homolog (seipin) [Source:MGI Symbol;Acc:MGI:1298392]
ENSMUSG00000063275	-0.571254	6.59627	7.55877	0.00597186	0.0668578	chr2	-	14056020	14026831	NM_013935	Hacd1	3-hydroxyacyl-CoA dehydratase 1 [Source:MGI Symbol;Acc:MGI:1353592]
ENSMUSG00000038695	-0.571695	5.10633	6.95356	0.00836526	0.0786373	chr7	+	44467980	44471652	NM_001205071	Josd2	Josephin domain containing 2 [Source:MGI Symbol;Acc:MGI:1913374]
ENSMUSG00000026385	-0.572093	7.00517	8.07393	0.00449066	0.0581717	chr1	-	120121078	120113280	NM_007830	Dbi	diazepam binding inhibitor [Source:MGI Symbol;Acc:MGI:94865]
ENSMUSG00000022450	-0.573062	5.88484	6.17294	0.0129719	0.0967882	chr15	-	82354291	82350139	NM_025987	Ndufa6	NADH dehydrogenase (ubiquinone) 1 alpha subcomplex, 6 (B14) [Source:MGI Symbol;Acc:MGI:1914380]
ENSMUSG00000031021	-0.576233	5.25492	7.03369	0.00799901	0.0771714	chr7	-	109752279	109735834	NM_020050	Tmem9b	TMEM9 domain family, member B [Source:MGI Symbol;Acc:MGI:1915254]
ENSMUSG00000031158	-0.576557	4.82645	8.65556	0.00326064	0.0494938	chrX	+	7899357	7908351	NM_011591	Timm17b	translocase of inner mitochondrial membrane 17b [Source:MGI Symbol;Acc:MGI:1343176]
ENSMUSG00000051256	-0.577217	5.29019	9.24305	0.00236391	0.0415397	chr6	+	113442569	113448229	NM_026365	Jagn1	jagunal homolog 1 (Drosophila) [Source:MGI Symbol;Acc:MGI:1915017]
ENSMUSG00000032602	-0.577835	5.74982	8.22732	0.00412643	0.0560352	chr9	+	108662098	108684641	NM_020520	Slc25a20	solute carrier family 25 (mitochondrial carnitine/acylcarnitine translocase), member 20 [Source:MGI Symbol;Acc:MGI:1928738]
ENSMUSG00000045438	-0.578627	5.4055	6.33356	0.0118474	0.0936336	chr5	-	139345233	139336189	NM_197980	Cox19	cytochrome c oxidase assembly protein 19 [Source:MGI Symbol;Acc:MGI:1915283]
ENSMUSG00000052833	-0.57898	7.30684	8.44635	0.00365778	0.0524946	chr7	-	16387797	16327053	NM_001285891	Sae1	SUMO1 activating enzyme subunit 1 [Source:MGI Symbol;Acc:MGI:1929264]
ENSMUSG00000002014	-0.579333	5.72607	9.11764	0.00253156	0.0432865	chrX	+	73787062	73790826	NM_009279	Ssr4	signal sequence receptor, delta [Source:MGI Symbol;Acc:MGI:1099464]
ENSMUSG00000017801	-0.579601	4.82652	9.74353	0.00179955	0.0352808	chr11	+	101087277	101092207	NM_001159385	Mlx	MAX-like protein X [Source:MGI Symbol;Acc:MGI:108398]
ENSMUSG00000029632	-0.580782	7.62036	7.43817	0.00638546	0.0689924	chr6	-	11907446	11900373	NM_010886	Ndufa4	NADH dehydrogenase (ubiquinone) 1 alpha subcomplex, 4 [Source:MGI Symbol;Acc:MGI:107686]
ENSMUSG00000027367	-0.580926	7.57359	11.3512	0.000753973	0.0214917	chr2	+	127270229	127298932	NM_139308	Stard7	START domain containing 7 [Source:MGI Symbol;Acc:MGI:2139090]
ENSMUSG00000069844	-0.581256	5.39419	8.16836	0.00426275	0.0571337	chr11	+	67052670	67065572	NM_001040026	Sco1	SCO cytochrome oxidase deficient homolog 1 (yeast) [Source:MGI Symbol;Acc:MGI:106362]
ENSMUSG00000020307	-0.582441	6.90813	7.77709	0.00529129	0.0629078	chr10	+	79682195	79688394	NM_177613	Cdc34	cell division cycle 34 [Source:MGI Symbol;Acc:MGI:102657]
ENSMUSG00000021281	-0.583041	6.57059	8.134	0.00434429	0.0576644	chr12	+	111442469	111455018	NM_009396	Tnfaip2	tumor necrosis factor, alpha-induced protein 2 [Source:MGI Symbol;Acc:MGI:104960]
ENSMUSG00000025736	-0.583114	4.39511	8.69925	0.00318341	0.0488609	chr17	+	25829043	25831842	NM_028101	Jmjd8	jumonji domain containing 8 [Source:MGI Symbol;Acc:MGI:1919356]
ENSMUSG00000038244	-0.584268	7.02478	8.61293	0.00333784	0.0499331	chr7	+	112225856	112355194	NM_177282	Mical2	microtubule associated monooxygenase, calponin and LIM domain containing 2 [Source:MGI Symbol;Acc:MGI:2444947]
ENSMUSG00000004069	-0.585341	6.49694	6.56189	0.0104185	0.0879169	chr16	+	4684070	4707695	NM_023646	Dnaja3	DnaJ (Hsp40) homolog, subfamily A, member 3 [Source:MGI Symbol;Acc:MGI:1933786]
ENSMUSG00000029009	-0.585851	5.61632	11.2808	0.000783114	0.021968	chr4	+	148039077	148056206	NM_010840	Mthfr	5,10-methylenetetrahydrofolate reductase [Source:MGI Symbol;Acc:MGI:106639]
ENSMUSG00000049516	-0.58619	6.54197	7.85208	0.00507624	0.0615065	chr7	-	47008411	46990396	NM_175318	Spty2d1	SPT2, Suppressor of Ty, domain containing 1 (S. cerevisiae) [Source:MGI Symbol;Acc:MGI:2142062]
ENSMUSG00000062997	-0.587453	8.73709	8.82263	0.00297517	0.0473692	chr2	-	39005624	39001580	NM_025592	Rpl35	ribosomal protein L35 [Source:MGI Symbol;Acc:MGI:1913739]
ENSMUSG00000029610	-0.588745	5.50616	9.34882	0.00223129	0.0398892	chr5	-	143909839	143902704	NM_001172146	Aimp2	aminoacyl tRNA synthetase complex-interacting multifunctional protein 2 [Source:MGI Symbol;Acc:MGI:2385237]
ENSMUSG00000031532	-0.589078	7.14916	9.65003	0.00189348	0.0367728	chr8	+	34154563	34170845	NM_026432	Saraf	store-operated calcium entry-associated regulatory factor [Source:MGI Symbol;Acc:MGI:1915137]
ENSMUSG00000029762	-0.591239	6.59353	6.84423	0.0088928	0.0813103	chr6	+	34354119	34368463	NM_008012	Akr1b8	aldo-keto reductase family 1, member B8 [Source:MGI Symbol;Acc:MGI:107673]
ENSMUSG00000086784	-0.591241	2.30306	6.29247	0.0121252	0.0942128	chr7	+	4877053	4895717	NM_001101598	Isoc2a	isochorismatase domain containing 2a [Source:MGI Symbol;Acc:MGI:3609243]
ENSMUSG00000028070	-0.592957	5.54221	7.86541	0.00503894	0.0613092	chr3	-	88058495	88056520	NM_144897	Apoa1bp	apolipoprotein A-I binding protein [Source:MGI Symbol;Acc:MGI:2180167]
ENSMUSG00000026864	-0.593261	9.9657	6.2835	0.0121867	0.0943718	chr2	+	34772095	34776531	NM_022310	Hspa5	heat shock protein 5 [Source:MGI Symbol;Acc:MGI:95835]
ENSMUSG00000055681	-0.594703	6.3633	11.1302	0.000849353	0.0229681	chr8	+	70302518	70312990	NM_021538	Cope	coatomer protein complex, subunit epsilon [Source:MGI Symbol;Acc:MGI:1891702]
ENSMUSG00000032553	-0.598244	5.6839	12.595	0.000386785	0.0144124	chr9	-	103202137	103188032	NM_009275	Srprb	signal recognition particle receptor, B subunit [Source:MGI Symbol;Acc:MGI:102964]
ENSMUSG00000003031	-0.598244	5.04802	10.212	0.00139531	0.0305185	chr6	+	134920401	134925513	NM_009875	Cdkn1b	cyclin-dependent kinase inhibitor 1B [Source:MGI Symbol;Acc:MGI:104565]
ENSMUSG00000004945	-0.599999	5.26487	7.10975	0.00766658	0.0756478	chr17	-	5440243	5410870	NM_027457	Tmem242	transmembrane protein 242 [Source:MGI Symbol;Acc:MGI:1917794]
ENSMUSG00000019738	-0.600095	4.12765	7.29596	0.00691098	0.0718151	chr7	+	30231948	30233390	NM_027259	Polr2i	polymerase (RNA) II (DNA directed) polypeptide I [Source:MGI Symbol;Acc:MGI:1917170]
ENSMUSG00000026399	-0.600329	4.48468	6.35232	0.0117228	0.0930827	chr1	-	130462744	130439027	NM_010016	Cd55	CD55 antigen [Source:MGI Symbol;Acc:MGI:104850]
ENSMUSG00000022956	-0.601852	8.2532	7.9176	0.00489561	0.0604412	chr16	-	91931687	91925214	NM_138597	Atp5o	ATP synthase, H+ transporting, mitochondrial F1 complex, O subunit [Source:MGI Symbol;Acc:MGI:106341]
ENSMUSG00000015747	-0.602262	4.79575	8.27764	0.00401363	0.0552578	chr3	-	96058466	95999832	NM_013841	Vps45	vacuolar protein sorting 45 (yeast) [Source:MGI Symbol;Acc:MGI:891965]
ENSMUSG00000020107	-0.603027	5.39435	10.1738	0.00142451	0.0308251	chr10	-	60003135	59987409	NM_025514	Anapc16	anaphase promoting complex subunit 16 [Source:MGI Symbol;Acc:MGI:1289325]
ENSMUSG00000019916	-0.603221	7.47604	7.31464	0.0068395	0.0715833	chr10	+	59323296	59373304	NM_011030	P4ha1	procollagen-proline, 2-oxoglutarate 4-dioxygenase (proline 4-hydroxylase), alpha 1 polypeptide [Source:MGI Symbol;Acc:MGI:97463]
ENSMUSG00000026087	-0.603488	5.9068	8.44344	0.00366363	0.0525176	chr1	+	37890477	37898535	NM_027098	Mrpl30	mitochondrial ribosomal protein L30 [Source:MGI Symbol;Acc:MGI:1333820]
ENSMUSG00000028247	-0.603589	4.81799	8.52628	0.00350055	0.0511883	chr4	+	21879673	21912162	NM_172687	Coq3	coenzyme Q3 homolog, methyltransferase (yeast) [Source:MGI Symbol;Acc:MGI:101813]
ENSMUSG00000018800	-0.604452	5.41105	7.39651	0.00653505	0.069758	chr11	-	110337678	110269369	NM_147219	Abca5	ATP-binding cassette, sub-family A (ABC1), member 5 [Source:MGI Symbol;Acc:MGI:2386607]
ENSMUSG00000054434	-0.604969	4.38105	6.68398	0.00972832	0.0848126	chr5	+	123076275	123117749	NM_001039723	Tmem120b	transmembrane protein 120B [Source:MGI Symbol;Acc:MGI:3603158]
ENSMUSG00000025204	-0.605023	6.10804	7.34104	0.00673978	0.07094	chr19	-	44555440	44550240	NM_026061	Ndufb8	NADH dehydrogenase (ubiquinone) 1 beta subcomplex 8 [Source:MGI Symbol;Acc:MGI:1914514]
ENSMUSG00000018995	-0.605194	5.0727	8.45594	0.00363853	0.0523398	chr7	+	96951505	97064761	NM_153591	Nars2	asparaginyl-tRNA synthetase 2 (mitochondrial)(putative) [Source:MGI Symbol;Acc:MGI:2142075]
ENSMUSG00000026317	-0.605636	5.74108	7.39641	0.00653541	0.069758	chr8	+	14888111	14901720	NM_012000	Cln8	ceroid-lipofuscinosis, neuronal 8 [Source:MGI Symbol;Acc:MGI:1349447]
ENSMUSG00000020246	-0.606081	5.33051	8.09533	0.00443793	0.0579743	chr10	+	82699007	82742428	NM_001081218	Hcfc2	host cell factor C2 [Source:MGI Symbol;Acc:MGI:1915183]
ENSMUSG00000021548	-0.60772	4.49305	11.1402	0.000844758	0.0229681	chr13	+	85189408	85213723	NM_023243	Ccnh	cyclin H [Source:MGI Symbol;Acc:MGI:1913921]
ENSMUSG00000017188	-0.608075	5.39541	7.64316	0.00569879	0.065338	chr11	-	101279114	101277968	NM_026618	Coa3	cytochrome C oxidase assembly factor 3 [Source:MGI Symbol;Acc:MGI:1098757]
ENSMUSG00000001211	-0.609859	7.75282	8.01562	0.00463757	0.0590774	chr10	-	78351700	78271563	NM_053014	Agpat3	1-acylglycerol-3-phosphate O-acyltransferase 3 [Source:MGI Symbol;Acc:MGI:1336186]
ENSMUSG00000038668	-0.610707	6.69226	8.57442	0.00340919	0.0505091	chr4	-	58553357	58435255	NM_172989	Lpar1	lysophosphatidic acid receptor 1 [Source:MGI Symbol;Acc:MGI:108429]
ENSMUSG00000028557	-0.610759	8.36849	6.69491	0.00966888	0.084581	chr4	-	109476675	109451098	NM_013876	Rnf11	ring finger protein 11 [Source:MGI Symbol;Acc:MGI:1352759]
ENSMUSG00000019797	-0.611742	4.26004	6.6822	0.00973801	0.0848373	chr10	-	43540994	43525121	NM_026411	1700021F05Rik	RIKEN cDNA 1700021F05 gene [Source:MGI Symbol;Acc:MGI:1915101]
ENSMUSG00000026411	-0.613722	6.01323	6.44816	0.0111067	0.0903956	chr1	+	136008150	136034267	NM_001160145	Tmem9	transmembrane protein 9 [Source:MGI Symbol;Acc:MGI:1913491]
ENSMUSG00000026663	-0.61405	8.00039	9.50559	0.00204847	0.0381676	chr1	-	170867771	170704674	NM_001081304	Atf6	activating transcription factor 6 [Source:MGI Symbol;Acc:MGI:1926157]
ENSMUSG00000037752	-0.614782	3.1948	6.7927	0.00915315	0.0824717	chr4	-	132732546	132724897	NM_201368	Xkr8	X Kell blood group precursor related family member 8 homolog [Source:MGI Symbol;Acc:MGI:2685877]
ENSMUSG00000052712	-0.616258	6.27176	7.88253	0.00499147	0.0610776	chr17	+	29268788	29302881	NM_030561	BC004004	cDNA sequence BC004004 [Source:MGI Symbol;Acc:MGI:2136782]
ENSMUSG00000024997	-0.616272	7.08364	8.68723	0.00320446	0.0489836	chr19	-	60874556	60864051	NM_007452	Prdx3	peroxiredoxin 3 [Source:MGI Symbol;Acc:MGI:88034]
ENSMUSG00000051989	-0.616535	3.82244	6.94598	0.0084008	0.0787476	chr16	+	92301286	92313041	NM_138743	Smim11	small integral membrane protein 11 [Source:MGI Symbol;Acc:MGI:1916186]
ENSMUSG00000037938	-0.61681	3.68509	8.54014	0.00347399	0.0509807	chr2	+	129129700	129134134	NM_025395	Chchd5	coiled-coil-helix-coiled-coil-helix domain containing 5 [Source:MGI Symbol;Acc:MGI:1913420]
ENSMUSG00000020647	-0.617147	5.9398	6.16177	0.0130541	0.0971673	chr12	-	4477182	4247363	NM_010881	Ncoa1	nuclear receptor coactivator 1 [Source:MGI Symbol;Acc:MGI:1276523]
ENSMUSG00000079144	-0.617721	3.9451	7.71096	0.00548866	0.0640568	chr1	+	193173468	193176298	NM_001160360	A130010J15Rik	RIKEN cDNA A130010J15 gene [Source:MGI Symbol;Acc:MGI:2441776]
ENSMUSG00000028811	-0.617947	7.01755	10.7022	0.0010701	0.0258024	chr4	+	129189760	129219607	NM_134151	Yars	tyrosyl-tRNA synthetase [Source:MGI Symbol;Acc:MGI:2147627]
ENSMUSG00000032435	-0.618123	7.90476	10.1475	0.00144496	0.030902	chr9	+	114688790	114724302	NM_146229	Dync1li1	dynein cytoplasmic 1 light intermediate chain 1 [Source:MGI Symbol;Acc:MGI:2135610]
ENSMUSG00000001473	-0.619768	9.50475	7.60644	0.00581601	0.0661808	chr18	+	67390717	67402748	NM_026473	Tubb6	tubulin, beta 6 class V [Source:MGI Symbol;Acc:MGI:1915201]
ENSMUSG00000034403	-0.619868	6.56799	11.1236	0.000852374	0.0229681	chrX	-	99470672	99466146	NM_008853	Pja1	praja ring finger 1, E3 ubiquitin protein ligase [Source:MGI Symbol;Acc:MGI:1101765]
ENSMUSG00000029263	-0.620204	4.15861	8.39082	0.0037712	0.0533793	chr5	+	108312609	108348233	NM_001081234	Pigg	phosphatidylinositol glycan anchor biosynthesis, class G [Source:MGI Symbol;Acc:MGI:3576484]
ENSMUSG00000025268	-0.620732	6.46784	9.05949	0.00261335	0.0441221	chrX	-	150814345	150806370	NM_030700	Maged2	melanoma antigen, family D, 2 [Source:MGI Symbol;Acc:MGI:1933391]
ENSMUSG00000025151	-0.620948	9.23576	11.0727	0.000876082	0.0233034	chrX	-	94542143	94535474	NM_019791	Maged1	melanoma antigen, family D, 1 [Source:MGI Symbol;Acc:MGI:1930187]
ENSMUSG00000074497	-0.621415	2.71215	6.1713	0.0129839	0.0968198	chr8	+	3353415	3390295	NM_001033378	A430078G23Rik	RIKEN cDNA A430078G23 gene [Source:MGI Symbol;Acc:MGI:2442135]
ENSMUSG00000020570	-0.62156	7.54407	7.52609	0.00608116	0.0677749	chr12	+	32953891	32979050	NM_013635	Sypl	synaptophysin-like protein [Source:MGI Symbol;Acc:MGI:108081]
ENSMUSG00000026172	-0.623349	4.17955	6.91769	0.00853473	0.0792071	chr1	+	74588300	74592443	NM_001305652	Bcs1l	BCS1-like (yeast) [Source:MGI Symbol;Acc:MGI:1914071]
ENSMUSG00000032905	-0.62351	6.4109	7.14893	0.00750086	0.0748936	chr18	-	46741579	46732417	NM_026217	Atg12	autophagy related 12 [Source:MGI Symbol;Acc:MGI:1914776]
ENSMUSG00000029161	-0.623522	4.92048	7.83139	0.00513467	0.0618527	chr5	-	30945591	30933143	NM_001160149	Cgref1	cell growth regulator with EF hand domain 1 [Source:MGI Symbol;Acc:MGI:1915817]
ENSMUSG00000072946	-0.623605	6.48438	9.05465	0.00262028	0.0441627	chr12	+	84285232	84315832	NM_029880	Ptgr2	prostaglandin reductase 2 [Source:MGI Symbol;Acc:MGI:1916372]
ENSMUSG00000014294	-0.624014	6.37816	8.27574	0.00401782	0.0552578	chr18	-	36744557	36742332	NM_010885	Ndufa2	NADH dehydrogenase (ubiquinone) 1 alpha subcomplex, 2 [Source:MGI Symbol;Acc:MGI:1343103]
ENSMUSG00000040370	-0.625787	5.08821	7.5948	0.0058537	0.0661938	chr6	+	145211134	145215791	NM_001163628	Lyrm5	LYR motif containing 5 [Source:MGI Symbol;Acc:MGI:1914886]
ENSMUSG00000024158	-0.626799	4.74768	6.08246	0.0136531	0.0997211	chr17	+	24850490	24864450	NM_024284	Hagh	hydroxyacyl glutathione hydrolase [Source:MGI Symbol;Acc:MGI:95745]
ENSMUSG00000006941	-0.626857	4.60436	8.52295	0.00350696	0.0512215	chr9	+	120492606	120495327	NM_026892	Eif1b	eukaryotic translation initiation factor 1B [Source:MGI Symbol;Acc:MGI:1916219]
ENSMUSG00000042111	-0.627809	4.52808	6.72128	0.00952691	0.0841839	chr1	-	34439672	34436670	NM_027159	Ccdc115	coiled-coil domain containing 115 [Source:MGI Symbol;Acc:MGI:1916918]
ENSMUSG00000027952	-0.627856	3.83455	6.57666	0.0103324	0.0873106	chr3	+	89459118	89469013	NM_026784	Pmvk	phosphomevalonate kinase [Source:MGI Symbol;Acc:MGI:1915853]
ENSMUSG00000026458	-0.628033	7.26196	6.60068	0.010194	0.0867331	chr1	-	134332928	134296783	NM_001144855	Ppfia4	protein tyrosine phosphatase, receptor type, f polypeptide (PTPRF), interacting protein (liprin), alpha 4 [Source:MGI Symbol;Acc:MGI:1915757]
ENSMUSG00000021196	-0.62854	5.20374	10.6988	0.00107206	0.0258024	chr13	-	6648725	6581182	NM_001291071	Pfkp	phosphofructokinase, platelet [Source:MGI Symbol;Acc:MGI:1891833]
ENSMUSG00000029185	-0.629009	5.12035	7.64115	0.00570517	0.0653506	chr5	+	64970071	65041886	NM_026667	Fam114a1	family with sequence similarity 114, member A1 [Source:MGI Symbol;Acc:MGI:1915553]
ENSMUSG00000025578	-0.629283	2.80942	6.90809	0.00858064	0.0794077	chr11	-	119040969	119036305	NM_013926	Cbx8	chromobox 8 [Source:MGI Symbol;Acc:MGI:1353589]
ENSMUSG00000018819	-0.629757	7.21456	8.00439	0.00466642	0.0591977	chr7	+	142460809	142494867	NM_001271510	Lsp1	lymphocyte specific 1 [Source:MGI Symbol;Acc:MGI:96832]
ENSMUSG00000057895	-0.630363	3.61878	6.42919	0.011226	0.0909021	chr9	+	122923072	122931028	NM_009544	Zfp105	zinc finger protein 105 [Source:MGI Symbol;Acc:MGI:1277119]
ENSMUSG00000032478	-0.630613	3.69674	6.50126	0.0107798	0.0888883	chr9	+	109832758	109842974	NM_018757	Nme6	NME/NM23 nucleoside diphosphate kinase 6 [Source:MGI Symbol;Acc:MGI:1861676]
ENSMUSG00000032114	-0.631344	4.51207	6.28298	0.0121903	0.0943718	chr9	+	44398176	44402963	NM_001293631	Slc37a4	solute carrier family 37 (glucose-6-phosphate transporter), member 4 [Source:MGI Symbol;Acc:MGI:1316650]
ENSMUSG00000032314	-0.632403	5.92323	10.0068	0.00155965	0.032265	chr9	-	55512243	55454508	NM_145615	Etfa	electron transferring flavoprotein, alpha polypeptide [Source:MGI Symbol;Acc:MGI:106092]
ENSMUSG00000040174	-0.637044	4.75551	7.80175	0.00521957	0.062369	chr2	-	94010730	93980637	NM_026944	Alkbh3	alkB, alkylation repair homolog 3 (E. coli) [Source:MGI Symbol;Acc:MGI:1916363]
ENSMUSG00000030872	-0.637814	8.46454	6.97905	0.00824692	0.0778799	chr7	-	122021222	121986722	NM_028758	Gga2	golgi associated, gamma adaptin ear containing, ARF binding protein 2 [Source:MGI Symbol;Acc:MGI:1921355]
ENSMUSG00000039831	-0.638389	7.8151	9.66451	0.00187861	0.0367146	chr3	+	121953229	122016753	NM_172525	Arhgap29	Rho GTPase activating protein 29 [Source:MGI Symbol;Acc:MGI:2443818]
ENSMUSG00000073436	-0.639263	4.20803	10.0533	0.00152075	0.0317723	chr17	-	24895087	24892152	NM_001163102	Eme2	essential meiotic endonuclease 1 homolog 2 (S. pombe) [Source:MGI Symbol;Acc:MGI:1919889]
ENSMUSG00000024208	-0.639431	6.20301	6.24252	0.0124719	0.0952564	chr17	-	27133916	27122663	NM_026063	Uqcc2	ubiquinol-cytochrome c reductase complex assembly factor 2 [Source:MGI Symbol;Acc:MGI:1914517]
ENSMUSG00000022540	-0.63949	4.50705	6.67097	0.00979961	0.0851341	chr16	-	5013517	5008730	NM_133185	Rogdi	rogdi homolog (Drosophila) [Source:MGI Symbol;Acc:MGI:1913299]
ENSMUSG00000040888	-0.64049	4.62867	12.3957	0.000430331	0.0152229	chr17	-	24696156	24693191	NM_023040	Gfer	growth factor, erv1 (S. cerevisiae)-like (augmenter of liver regeneration) [Source:MGI Symbol;Acc:MGI:107757]
ENSMUSG00000040359	-0.640701	5.09064	11.3028	0.00077391	0.021772	chr4	-	25281821	25248605	NM_026194	Ufl1	UFM1 specific ligase 1 [Source:MGI Symbol;Acc:MGI:1914740]
ENSMUSG00000040811	-0.641688	4.0563	7.96265	0.00477524	0.0598032	chr7	+	19181204	19206479	NM_028153	Eml2	echinoderm microtubule associated protein like 2 [Source:MGI Symbol;Acc:MGI:1919455]
ENSMUSG00000039697	-0.642252	5.92494	6.79624	0.00913501	0.0823773	chr10	-	30655867	30645584	NM_001111267	Ncoa7	nuclear receptor coactivator 7 [Source:MGI Symbol;Acc:MGI:2444847]
ENSMUSG00000040511	-0.64367	6.69669	12.9832	0.000314296	0.0129605	chr7	-	19921160	19903578	NM_027514	Pvr	poliovirus receptor [Source:MGI Symbol;Acc:MGI:107741]
ENSMUSG00000028653	-0.644476	5.35497	10.7761	0.00102819	0.0253887	chr4	+	123016597	123054949	NM_025873	Trit1	tRNA isopentenyltransferase 1 [Source:MGI Symbol;Acc:MGI:1914216]
ENSMUSG00000029432	-0.644546	6.63582	7.10584	0.00768332	0.0756771	chr5	+	129725063	129758327	NM_008095	Gbas	glioblastoma amplified sequence [Source:MGI Symbol;Acc:MGI:1278343]
ENSMUSG00000074656	-0.644838	8.24808	9.564	0.0019843	0.0377626	chr2	-	154892935	154871410	NM_026030	Eif2s2	eukaryotic translation initiation factor 2, subunit 2 (beta) [Source:MGI Symbol;Acc:MGI:1914454]
ENSMUSG00000023456	-0.646052	9.5651	6.23023	0.0125587	0.0954912	chr6	-	124814296	124810586	NM_009415	Tpi1	triosephosphate isomerase 1 [Source:MGI Symbol;Acc:MGI:98797]
ENSMUSG00000024493	-0.647307	8.31485	13.6449	0.000220843	0.0100075	chr18	-	42262122	42202350	NM_134137	Lars	leucyl-tRNA synthetase [Source:MGI Symbol;Acc:MGI:1913808]
ENSMUSG00000063659	-0.647464	7.777	8.54392	0.00346679	0.0509807	chr1	+	177444295	177450764	NM_001012330	Zbtb18	zinc finger and BTB domain containing 18 [Source:MGI Symbol;Acc:MGI:1353609]
ENSMUSG00000020910	-0.647524	3.70625	8.99663	0.00270478	0.0450398	chr11	-	67052570	67038041	NM_025510	Adprm	ADP-ribose/CDP-alcohol diphosphatase, manganese dependent [Source:MGI Symbol;Acc:MGI:1913608]
ENSMUSG00000043257	-0.647696	3.38076	7.79933	0.00522658	0.062369	chr4	-	133672647	133660387	NM_178698	Pigv	phosphatidylinositol glycan anchor biosynthesis, class V [Source:MGI Symbol;Acc:MGI:2442480]
ENSMUSG00000024875	-0.648639	5.49983	8.7213	0.00314514	0.0486155	chr19	+	5088538	5092879	NM_026553	Yif1a	Yip1 interacting factor homolog A (S. cerevisiae) [Source:MGI Symbol;Acc:MGI:1915340]
ENSMUSG00000039745	-0.648675	3.15603	7.74687	0.00538058	0.0635523	chr7	+	49759106	49773999	NM_001146049	Htatip2	HIV-1 tat interactive protein 2, homolog (human) [Source:MGI Symbol;Acc:MGI:1859271]
ENSMUSG00000056185	-0.649056	3.19499	6.08823	0.0136085	0.0996035	chr19	-	5510489	5495278	NM_001024560	Snx32	sorting nexin 32 [Source:MGI Symbol;Acc:MGI:2444704]
ENSMUSG00000027371	-0.650418	3.38072	6.88751	0.00867999	0.0800006	chr2	-	127444550	127436215	NM_029629	Fahd2a	fumarylacetoacetate hydrolase domain containing 2A [Source:MGI Symbol;Acc:MGI:1915376]
ENSMUSG00000027822	-0.650513	5.70829	11.9008	0.00056109	0.0179151	chr3	-	63964768	63942330	NM_015728	Slc33a1	solute carrier family 33 (acetyl-CoA transporter), member 1 [Source:MGI Symbol;Acc:MGI:1332247]
ENSMUSG00000009549	-0.65087	6.7156	9.6262	0.00191821	0.0371778	chr2	-	118479711	118475850	NM_009273	Srp14	signal recognition particle 14 [Source:MGI Symbol;Acc:MGI:107169]
ENSMUSG00000032018	-0.654191	5.29939	10.2849	0.00134121	0.0298527	chr9	-	42264300	42254177	NM_172769	Sc5d	sterol-C5-desaturase (fungal ERG3, delta-5-desaturase) homolog (S. cerevisae) [Source:MGI Symbol;Acc:MGI:1353611]
ENSMUSG00000048970	-0.6545	5.10591	7.90616	0.00492667	0.0605843	chrX	-	38635087	38630785	NM_021550	C1galt1c1	C1GALT1-specific chaperone 1 [Source:MGI Symbol;Acc:MGI:1913493]
ENSMUSG00000001105	-0.654562	4.85287	8.99642	0.00270508	0.0450398	chr11	+	78536361	78541737	NM_018854	Ift20	intraflagellar transport 20 [Source:MGI Symbol;Acc:MGI:1915585]
ENSMUSG00000025759	-0.654662	3.5731	6.30207	0.0120597	0.0942128	chr3	-	40846854	40818172	NM_028140	Mfsd8	major facilitator superfamily domain containing 8 [Source:MGI Symbol;Acc:MGI:1919425]
ENSMUSG00000038046	-0.655501	3.9008	6.33661	0.0118271	0.0936336	chr11	+	76243715	76250619	NM_183263	Rnmtl1	RNA methyltransferase like 1 [Source:MGI Symbol;Acc:MGI:1914640]
ENSMUSG00000020585	-0.657039	9.21636	8.89396	0.00286116	0.0462684	chr12	+	8921664	8938742	NM_008640	Laptm4a	lysosomal-associated protein transmembrane 4A [Source:MGI Symbol;Acc:MGI:108017]
ENSMUSG00000041881	-0.658226	6.73459	9.53439	0.00201657	0.0380148	chr17	+	33824591	33838316	NM_023202	Ndufa7	NADH dehydrogenase (ubiquinone) 1 alpha subcomplex, 7 (B14.5a) [Source:MGI Symbol;Acc:MGI:1913666]
ENSMUSG00000060913	-0.658422	7.35259	9.86861	0.00168122	0.0338185	chr3	+	19644474	19692421	NM_001081281	Trim55	tripartite motif-containing 55 [Source:MGI Symbol;Acc:MGI:3036269]
ENSMUSG00000006517	-0.658997	5.23124	9.17601	0.00245208	0.0426648	chr8	-	122443422	122433596	NM_138656	Mvd	mevalonate (diphospho) decarboxylase [Source:MGI Symbol;Acc:MGI:2179327]
ENSMUSG00000017386	-0.659219	7.25125	10.3835	0.00127143	0.02865	chr11	-	78165589	78159400	NM_009423	Traf4	TNF receptor associated factor 4 [Source:MGI Symbol;Acc:MGI:1202880]
ENSMUSG00000020843	-0.661551	5.42457	10.8009	0.00101451	0.0252524	chr11	+	76406952	76414329	NM_001291161	Timm22	translocase of inner mitochondrial membrane 22 [Source:MGI Symbol;Acc:MGI:1929742]
ENSMUSG00000021606	-0.661694	5.24677	10.5937	0.00113474	0.0264367	chr13	-	73328542	73319874	NM_010888	Ndufs6	NADH dehydrogenase (ubiquinone) Fe-S protein 6 [Source:MGI Symbol;Acc:MGI:107932]	AKA, Complex 1- the enzyme contains 44 separate polypeptide chains. the inhibition of complex I has been shown to cause the production of peroxides and a decrease in proteasome activity, which may lead to Parkinson’s disease
ENSMUSG00000021079	-0.662669	4.47043	8.78031	0.00304499	0.047804	chr12	-	71136675	71123173	NM_013896	Timm9	translocase of inner mitochondrial membrane 9 [Source:MGI Symbol;Acc:MGI:1353436]
ENSMUSG00000060950	-0.662892	4.42313	7.27095	0.00700788	0.0721645	chr12	+	111678105	111683902	NM_001099793	Trmt61a	tRNA methyltransferase 61A [Source:MGI Symbol;Acc:MGI:2443487]
ENSMUSG00000039263	-0.664006	6.09224	9.44554	0.00211663	0.038507	chr2	+	174110349	174123070	NM_213733	Npepl1	aminopeptidase-like 1 [Source:MGI Symbol;Acc:MGI:2448523]
ENSMUSG00000020056	-0.664641	4.51229	8.29108	0.00398403	0.0550015	chr10	+	88201093	88246158	NM_026070	Ccdc53	coiled-coil domain containing 53 [Source:MGI Symbol;Acc:MGI:1914532]
ENSMUSG00000041117	-0.666193	4.31594	6.54685	0.010507	0.0879434	chr7	+	16992708	16997516	NM_001101535	Ccdc8	coiled-coil domain containing 8 [Source:MGI Symbol;Acc:MGI:3612184]
ENSMUSG00000010755	-0.667529	7.27814	17.3789	3.06204e-05	0.00257691	chr7	-	143600090	143557230	NM_013742	Cars	cysteinyl-tRNA synthetase [Source:MGI Symbol;Acc:MGI:1351477]
ENSMUSG00000024588	-0.669689	7.18942	7.07333	0.00782397	0.0764038	chr18	-	64489066	64456550	NM_007998	Fech	ferrochelatase [Source:MGI Symbol;Acc:MGI:95513]
ENSMUSG00000030747	-0.673338	4.77822	6.2034	0.0127505	0.0957142	chr7	-	99182713	99153663	NM_026384	Dgat2	diacylglycerol O-acyltransferase 2 [Source:MGI Symbol;Acc:MGI:1915050]
ENSMUSG00000010461	-0.674557	6.37977	6.39408	0.0114502	0.0919006	chr10	-	23349895	23104168	NM_010167	Eya4	eyes absent 4 homolog (Drosophila) [Source:MGI Symbol;Acc:MGI:1337104]
ENSMUSG00000020629	-0.67695	4.21542	7.21281	0.00723851	0.0730405	chr12	+	28675231	28682175	NM_134052	Adi1	acireductone dioxygenase 1 [Source:MGI Symbol;Acc:MGI:2144929]
ENSMUSG00000001143	-0.677338	4.89861	11.4441	0.000717218	0.0207423	chr1	-	36445271	36422065	NM_001013374	Lman2l	lectin, mannose-binding 2-like [Source:MGI Symbol;Acc:MGI:2443010]
ENSMUSG00000029993	-0.678648	5.39223	7.15963	0.00745627	0.0745688	chr6	+	87009836	87028454	NM_020045	Nfu1	NFU1 iron-sulfur cluster scaffold homolog (S. cerevisiae) [Source:MGI Symbol;Acc:MGI:1913290]
ENSMUSG00000020964	-0.67892	7.38856	12.0051	0.000530556	0.0175475	chr12	-	91849157	91806043	NM_001039089	Sel1l	sel-1 suppressor of lin-12-like (C. elegans) [Source:MGI Symbol;Acc:MGI:1329016]
ENSMUSG00000056486	-0.681401	7.26204	8.72216	0.00314365	0.0486155	chr2	-	73775346	73610660	NM_001113246	Chn1	chimerin 1 [Source:MGI Symbol;Acc:MGI:1915674]
ENSMUSG00000020300	-0.681455	6.74702	6.74067	0.00942393	0.0836157	chr11	+	31872226	31935634	NM_001290678	Cpeb4	cytoplasmic polyadenylation element binding protein 4 [Source:MGI Symbol;Acc:MGI:1914829]
ENSMUSG00000058569	-0.681766	6.8204	16.3279	5.3274e-05	0.00380955	chr13	+	55593135	55597663	NM_026211	Tmed9	transmembrane emp24 protein transport domain containing 9 [Source:MGI Symbol;Acc:MGI:1914761]
ENSMUSG00000013622	-0.682881	5.24187	7.47904	0.00624212	0.0683063	chr5	+	31048635	31054623	NM_027855	Atraid	all-trans retinoic acid induced differentiation factor [Source:MGI Symbol;Acc:MGI:1918918]
ENSMUSG00000031519	-0.683019	8.75172	7.56159	0.00596254	0.0668578	chr8	+	54550331	54587836	NM_029569	Asb5	ankyrin repeat and SOCs box-containing 5 [Source:MGI Symbol;Acc:MGI:1923544]
ENSMUSG00000035199	-0.684153	8.88857	8.55538	0.00344502	0.0508184	chr6	+	97210689	97233315	NM_022992	Arl6ip5	ADP-ribosylation factor-like 6 interacting protein 5 [Source:MGI Symbol;Acc:MGI:1929501]
ENSMUSG00000031879	-0.684284	4.61723	12.1736	0.00048471	0.0163388	chr8	-	104641965	104639839	NM_026753	Fam96b	family with sequence similarity 96, member B [Source:MGI Symbol;Acc:MGI:1915773]
ENSMUSG00000030861	-0.685268	5.50149	8.34199	0.00387392	0.0542498	chr7	+	131410601	131446211	NM_025826	Acadsb	acyl-Coenzyme A dehydrogenase, short/branched chain [Source:MGI Symbol;Acc:MGI:1914135]
ENSMUSG00000022940	-0.685484	5.52901	8.10219	0.00442118	0.0578777	chr16	-	94371015	94364447	NM_001159617	Pigp	phosphatidylinositol glycan anchor biosynthesis, class P [Source:MGI Symbol;Acc:MGI:1860433]
ENSMUSG00000032115	-0.690322	8.56509	11.1797	0.000826987	0.0227348	chr9	+	44379490	44392369	NM_021395	Hyou1	hypoxia up-regulated 1 [Source:MGI Symbol;Acc:MGI:108030]
ENSMUSG00000025579	-0.693717	7.70862	14.5824	0.000134164	0.00731162	chr11	+	119267887	119285454	NM_008064	Gaa	glucosidase, alpha, acid [Source:MGI Symbol;Acc:MGI:95609]
ENSMUSG00000023809	-0.693759	6.84723	10.4485	0.00122748	0.0279139	chr17	+	7170115	7303313	NM_011299	Rps6ka2	ribosomal protein S6 kinase, polypeptide 2 [Source:MGI Symbol;Acc:MGI:1342290]
ENSMUSG00000008226	-0.694176	4.50104	6.18856	0.0128579	0.0962863	chr2	+	73312601	73337818	NM_029022	Scrn3	secernin 3 [Source:MGI Symbol;Acc:MGI:1921866]
ENSMUSG00000027357	-0.694296	5.12526	9.2627	0.00233868	0.0412722	chr2	+	132846666	132866785	NM_001024385	Crls1	cardiolipin synthase 1 [Source:MGI Symbol;Acc:MGI:1913836]
ENSMUSG00000021238	-0.694308	4.7147	8.01434	0.00464084	0.0590774	chr12	-	84450950	84430723	NM_134042	Aldh6a1	aldehyde dehydrogenase family 6, subfamily A1 [Source:MGI Symbol;Acc:MGI:1915077]
ENSMUSG00000029535	-0.695981	3.97223	7.12397	0.007606	0.0753957	chr5	+	115341225	115343569	NM_026933	Triap1	TP53 regulated inhibitor of apoptosis 1 [Source:MGI Symbol;Acc:MGI:1916326]
ENSMUSG00000036879	-0.696297	6.46448	6.10922	0.0134478	0.0988492	chr8	+	85841002	86061376	NM_199446	Phkb	phosphorylase kinase beta [Source:MGI Symbol;Acc:MGI:97578]
ENSMUSG00000002379	-0.697392	6.04922	8.64315	0.00328293	0.0497048	chr17	+	56717762	56724248	NM_027244	Ndufa11	NADH dehydrogenase (ubiquinone) 1 alpha subcomplex 11 [Source:MGI Symbol;Acc:MGI:1917125]
ENSMUSG00000032527	-0.697467	4.72326	8.51736	0.00351774	0.0512579	chr9	-	101034898	100982032	NM_025835	Pccb	propionyl Coenzyme A carboxylase, beta polypeptide [Source:MGI Symbol;Acc:MGI:1914154]
ENSMUSG00000030347	-0.69774	4.07717	9.65577	0.00188757	0.0367157	chr6	+	126939966	126975704	NM_138594	D6Wsu163e	DNA segment, Chr 6, Wayne State University 163, expressed [Source:MGI Symbol;Acc:MGI:107893]
ENSMUSG00000009894	-0.699871	6.71777	14.1229	0.00017125	0.00868685	chr11	-	59449999	59407134	NM_144521	Snap47	synaptosomal-associated protein, 47 [Source:MGI Symbol;Acc:MGI:1915076]
ENSMUSG00000036580	-0.699874	7.78042	9.26409	0.0023369	0.0412722	chr3	+	55112108	55137322	NM_144895	Spg20	spastic paraplegia 20, spartin (Troyer syndrome) homolog (human) [Source:MGI Symbol;Acc:MGI:2139806]
ENSMUSG00000033400	-0.700589	7.99601	6.99023	0.00819559	0.0778148	chr3	-	116808166	116739999	NM_001081326	Agl	amylo-1,6-glucosidase, 4-alpha-glucanotransferase [Source:MGI Symbol;Acc:MGI:1924809]
ENSMUSG00000024381	-0.704057	10.0358	7.39269	0.00654895	0.0698409	chr18	+	32377217	32435736	NM_001083334	Bin1	bridging integrator 1 [Source:MGI Symbol;Acc:MGI:108092]
ENSMUSG00000032902	-0.70668	7.12088	14.7136	0.00012514	0.00706898	chr3	+	104638668	104658462	NM_009196	Slc16a1	solute carrier family 16 (monocarboxylic acid transporters), member 1 [Source:MGI Symbol;Acc:MGI:106013]
ENSMUSG00000021906	-0.707449	5.0612	9.89906	0.00165363	0.0333477	chr14	+	32085413	32103202	NM_145460	Oxnad1	oxidoreductase NAD-binding domain containing 1 [Source:MGI Symbol;Acc:MGI:1916953]
ENSMUSG00000022193	-0.707991	6.68321	15.009	0.000106997	0.00618533	chr14	-	54617995	54614120	NM_011186	Psmb5	proteasome (prosome, macropain) subunit, beta type 5 [Source:MGI Symbol;Acc:MGI:1194513]
ENSMUSG00000067925	-0.708761	4.01373	7.81221	0.00518943	0.0622078	chrX	-	53643682	53642488	NM_024170	Cxx1a	CAAX box 1A [Source:MGI Symbol;Acc:MGI:1913408]
ENSMUSG00000058638	-0.708772	5.73014	10.2634	0.00135695	0.0300398	chr7	+	12834761	12850577	NM_022981	Zfp110	zinc finger protein 110 [Source:MGI Symbol;Acc:MGI:1890378]
ENSMUSG00000032047	-0.7092	6.62984	8.81033	0.0029953	0.0475062	chr9	-	53610382	53580522	NM_144784	Acat1	acetyl-Coenzyme A acetyltransferase 1 [Source:MGI Symbol;Acc:MGI:87870]
ENSMUSG00000033460	-0.709708	5.94348	9.48599	0.00207047	0.0383823	chrX	+	134717988	134721910	NM_001166377	Armcx1	armadillo repeat containing, X-linked 1 [Source:MGI Symbol;Acc:MGI:1925498]
ENSMUSG00000030086	-0.711311	3.4718	7.88633	0.00498097	0.0610095	chr6	-	89595652	89383146	NM_025351	Chchd6	coiled-coil-helix-coiled-coil-helix domain containing 6 [Source:MGI Symbol;Acc:MGI:1913348]
ENSMUSG00000024587	-0.713369	8.96374	16.2165	5.64991e-05	0.00397131	chr18	-	64516557	64499665	NM_027350	Nars	asparaginyl-tRNA synthetase [Source:MGI Symbol;Acc:MGI:1917473]
ENSMUSG00000026154	-0.71344	3.86262	7.64823	0.00568279	0.0652756	chr1	-	24005656	23995939	NM_026503	Sdhaf4	succinate dehydrogenase complex assembly factor 4 [Source:MGI Symbol;Acc:MGI:1915252]
ENSMUSG00000023249	-0.713583	7.33746	11.8605	0.000573363	0.0180485	chr9	-	106476949	106470322	NM_145619	Parp3	poly (ADP-ribose) polymerase family, member 3 [Source:MGI Symbol;Acc:MGI:1891258]
ENSMUSG00000072720	-0.714128	7.8895	8.28924	0.00398806	0.0550015	chr5	-	112896362	112688876	NM_028901	Myo18b	myosin XVIIIb [Source:MGI Symbol;Acc:MGI:1921626]
ENSMUSG00000029557	-0.714904	3.12666	7.77948	0.0052843	0.0629078	chr5	-	140331898	140327674	NM_026510	Ftsj2	FtsJ homolog 2 (E. coli) [Source:MGI Symbol;Acc:MGI:1915267]
ENSMUSG00000006356	-0.714984	8.52027	13.0542	0.000302605	0.012686	chr12	+	113140236	113145506	NM_024223	Crip2	cysteine rich protein 2 [Source:MGI Symbol;Acc:MGI:1915587]
ENSMUSG00000031490	-0.7167	6.67572	9.95168	0.00160702	0.0328061	chr8	+	27260327	27275656	NM_007918	Eif4ebp1	eukaryotic translation initiation factor 4E binding protein 1 [Source:MGI Symbol;Acc:MGI:103267]
ENSMUSG00000020439	-0.717021	6.66012	9.28874	0.00230566	0.0409231	chr11	-	3539239	3517523	NM_001284427	Smtn	smoothelin [Source:MGI Symbol;Acc:MGI:1354727]
ENSMUSG00000036473	-0.718741	5.56037	10.9484	0.000936837	0.0243992	chr17	-	24205535	24175431	NM_173186	Tbc1d24	TBC1 domain family, member 24 [Source:MGI Symbol;Acc:MGI:2443456]
ENSMUSG00000003420	-0.718812	4.55908	12.9986	0.000311723	0.0128974	chr7	-	45103822	45092993	NM_010189	Fcgrt	Fc receptor, IgG, alpha chain transporter [Source:MGI Symbol;Acc:MGI:103017]
ENSMUSG00000005873	-0.719775	7.36274	8.40265	0.00374674	0.0531547	chr18	-	34373415	34344889	NM_007874	Reep5	receptor accessory protein 5 [Source:MGI Symbol;Acc:MGI:1270152]
ENSMUSG00000030615	-0.720764	5.51396	7.54358	0.00602241	0.0672412	chr7	-	90457229	90450705	NM_025460	Tmem126a	transmembrane protein 126A [Source:MGI Symbol;Acc:MGI:1913521]
ENSMUSG00000018166	-0.720989	8.03017	8.80091	0.0030108	0.0476052	chr10	-	128589652	128567523	NM_010153	Erbb3	v-erb-b2 erythroblastic leukemia viral oncogene homolog 3 (avian) [Source:MGI Symbol;Acc:MGI:95411]
ENSMUSG00000073616	-0.722194	5.55596	10.2843	0.0013417	0.0298527	chr1	-	92641985	92637145	NM_001163425	Myeov2	myeloma overexpressed 2 [Source:MGI Symbol;Acc:MGI:1914165]
ENSMUSG00000030695	-0.723446	11.3912	6.23511	0.0125242	0.0953459	chr7	-	126799254	126795234	NM_007438	Aldoa	aldolase A, fructose-bisphosphate [Source:MGI Symbol;Acc:MGI:87994]
ENSMUSG00000057280	-0.723587	8.38142	7.50425	0.00615535	0.0679784	chr4	+	58285962	58374303	NM_001037130	Musk	muscle, skeletal, receptor tyrosine kinase [Source:MGI Symbol;Acc:MGI:103581]
ENSMUSG00000001467	-0.724057	7.55082	8.12718	0.00436064	0.0577312	chr5	-	4104746	4081145	NM_020010	Cyp51	cytochrome P450, family 51 [Source:MGI Symbol;Acc:MGI:106040]
ENSMUSG00000068739	-0.724746	7.91575	13.255	0.000271851	0.0118002	chr3	-	108445198	108424865	NM_001204979	Sars	seryl-aminoacyl-tRNA synthetase [Source:MGI Symbol;Acc:MGI:102809]
ENSMUSG00000058756	-0.726784	3.94157	7.92652	0.00487154	0.0603402	chr11	+	98741873	98765111	NM_178060	Thra	thyroid hormone receptor alpha [Source:MGI Symbol;Acc:MGI:98742]
ENSMUSG00000031168	-0.726922	4.45179	8.72281	0.00314253	0.0486155	chrX	-	8193512	8185329	NM_007898	Ebp	phenylalkylamine Ca2+ antagonist (emopamil) binding protein [Source:MGI Symbol;Acc:MGI:107822]
ENSMUSG00000022012	-0.727694	4.47453	9.51017	0.00204336	0.0381676	chr14	+	77156763	77721760	NM_172813	Enox1	ecto-NOX disulfide-thiol exchanger 1 [Source:MGI Symbol;Acc:MGI:2444896]
ENSMUSG00000030327	-0.729326	6.21408	10.7526	0.00104135	0.02551	chr6	+	122874557	122888934	NM_026267	Necap1	NECAP endocytosis associated 1 [Source:MGI Symbol;Acc:MGI:1914852]
ENSMUSG00000034110	-0.729543	4.39614	6.59578	0.0102221	0.0867649	chr5	+	130144861	130155806	NM_172509	Kctd7	potassium channel tetramerisation domain containing 7 [Source:MGI Symbol;Acc:MGI:2442265]
ENSMUSG00000058402	-0.730913	2.94703	6.78002	0.00921838	0.0826393	chr7	+	29859979	29876505	NM_172740	Zfp420	zinc finger protein 420 [Source:MGI Symbol;Acc:MGI:2444666]
ENSMUSG00000028551	-0.7313	4.36541	8.97862	0.00273157	0.0451768	chr4	-	109667189	109660876	NM_001301368	Cdkn2c	cyclin-dependent kinase inhibitor 2C (p18, inhibits CDK4) [Source:MGI Symbol;Acc:MGI:105388]
ENSMUSG00000057315	-0.731409	6.43264	11.6126	0.000655082	0.0195749	chr5	+	102481391	102897937	NM_029270	Arhgap24	Rho GTPase activating protein 24 [Source:MGI Symbol;Acc:MGI:1922647]
ENSMUSG00000050312	-0.735079	3.79583	6.90023	0.00861848	0.0796855	chr16	-	62786777	62732444	NM_178925	Nsun3	NOL1/NOP2/Sun domain family member 3 [Source:MGI Symbol;Acc:MGI:2146565]
ENSMUSG00000032803	-0.737033	8.96057	13.9566	0.000187076	0.0091838	chr9	-	103365840	103353094	NM_175833	Cdv3	carnitine deficiency-associated gene expressed in ventricle 3 [Source:MGI Symbol;Acc:MGI:2448759]
ENSMUSG00000042549	-0.737725	2.99338	9.22902	0.00238209	0.0417322	chr11	-	60931867	60920917	NR_027800	Map2k3os	mitogen-activated protein kinase kinase 3, opposite strand [Source:MGI Symbol;Acc:MGI:1344334]
ENSMUSG00000018599	-0.739674	6.26408	9.91483	0.00163953	0.0332543	chr11	+	60728398	60732951	NM_001009927	Mief2	mitochondrial elongation factor 2 [Source:MGI Symbol;Acc:MGI:2144199]
ENSMUSG00000025512	-0.740349	5.90012	17.3303	3.14142e-05	0.00262584	chr7	-	141539857	141493137	NM_001142681	Chid1	chitinase domain containing 1 [Source:MGI Symbol;Acc:MGI:1915288]
ENSMUSG00000002076	-0.743645	4.32453	7.58874	0.0058734	0.0662351	chr17	-	32034508	31944769	NM_028902	Hsf2bp	heat shock transcription factor 2 binding protein [Source:MGI Symbol;Acc:MGI:1921627]
ENSMUSG00000032673	-0.744296	3.48872	7.02991	0.00801594	0.0771714	chr11	-	29515033	29512876	NM_026465	Prorsd1	prolyl-tRNA synthetase domain containing 1 [Source:MGI Symbol;Acc:MGI:1915189]
ENSMUSG00000029166	-0.744511	5.09293	7.18046	0.00737017	0.073995	chr5	+	30814641	30866106	NM_133350	Mapre3	microtubule-associated protein, RP/EB family, member 3 [Source:MGI Symbol;Acc:MGI:2140967]
ENSMUSG00000042505	-0.745172	3.24565	6.30692	0.0120268	0.094211	chr6	+	6956004	7042979	NM_001077713	Sdhaf3	succinate dehydrogenase complex assembly factor 3 [Source:MGI Symbol;Acc:MGI:1913288]
ENSMUSG00000020389	-0.748002	2.83168	9.79123	0.00175347	0.0347757	chr11	+	52004221	52084667	NM_001166654	Cdkl3	cyclin-dependent kinase-like 3 [Source:MGI Symbol;Acc:MGI:2388268]
ENSMUSG00000006057	-0.748933	7.63285	12.5056	0.000405736	0.0148502	chr11	-	96075670	96068852	NM_007506	Atp5g1	ATP synthase, H+ transporting, mitochondrial F0 complex, subunit C1 (subunit 9) [Source:MGI Symbol;Acc:MGI:107653]	subunit of mitochondrial ATP synthase aka Complex V. Mitochondrial ATP synthase catalyzes ATP synthesis. ATP synthase consist of 2 subunits F1 and F0:the membrane-spanning component, Fo, comprising the proton channel whichseems to have nine subunits (a, b, c, d, e, f, g, F6 and 8
ENSMUSG00000042918	-0.749248	5.67635	12.2041	0.00047684	0.016206	chr7	+	45639993	45645211	NM_172418	Mamstr	MEF2 activating motif and SAP domain containing transcriptional regulator [Source:MGI Symbol;Acc:MGI:1921740]
ENSMUSG00000046794	-0.749442	3.11616	8.64705	0.00327591	0.0496646	chr8	+	35375741	35388124	NM_177741	Ppp1r3b	protein phosphatase 1, regulatory (inhibitor) subunit 3B [Source:MGI Symbol;Acc:MGI:2177268]
ENSMUSG00000000399	-0.750968	6.94825	10.2753	0.00134824	0.0299446	chr6	-	126849125	126821954	NM_025358	Ndufa9	NADH dehydrogenase (ubiquinone) 1 alpha subcomplex, 9 [Source:MGI Symbol;Acc:MGI:1913358]	Aka, complex 1
ENSMUSG00000035268	-0.751171	8.10789	8.62708	0.00331202	0.0498524	chr2	+	163658399	163726154	NM_001039391	Pkig	protein kinase inhibitor, gamma [Source:MGI Symbol;Acc:MGI:1343086]
ENSMUSG00000061758	-0.751754	4.95147	17.1847	3.39159e-05	0.00274231	chr6	+	34384218	34396950	NM_172398	Akr1b10	aldo-keto reductase family 1, member B10 (aldose reductase) [Source:MGI Symbol;Acc:MGI:1915111]
ENSMUSG00000034327	-0.752051	5.65119	6.48892	0.0108549	0.0891082	chr14	+	67715937	67739661	NM_001285933	Kctd9	potassium channel tetramerisation domain containing 9 [Source:MGI Symbol;Acc:MGI:2145579]
ENSMUSG00000051705	-0.755823	4.09192	9.51314	0.00204006	0.0381676	chr9	-	59750649	59734259	NM_001172071	Senp8	SUMO/sentrin specific peptidase 8 [Source:MGI Symbol;Acc:MGI:1918849]
ENSMUSG00000006315	-0.755974	6.21934	14.1245	0.000171105	0.00868685	chr7	-	30729534	30727701	NM_027215	Tmem147	transmembrane protein 147 [Source:MGI Symbol;Acc:MGI:1915011]
ENSMUSG00000030616	-0.758564	8.21076	9.23457	0.00237488	0.0416733	chr7	+	90348699	90410439	NM_001289584	Sytl2	synaptotagmin-like 2 [Source:MGI Symbol;Acc:MGI:1933366]
ENSMUSG00000031708	-0.759583	8.37021	11.12	0.00085404	0.0229681	chr8	-	83594491	83571700	NM_134118	Tecr	trans-2,3-enoyl-CoA reductase [Source:MGI Symbol;Acc:MGI:1915408]
ENSMUSG00000003814	-0.760602	9.49934	7.86634	0.00503635	0.0613092	chr8	-	84846934	84841850	NM_007591	Calr	calreticulin [Source:MGI Symbol;Acc:MGI:88252]
ENSMUSG00000044813	-0.760985	6.15179	12.3456	0.000442028	0.015491	chr4	-	45530330	45423278	NM_001033306	Shb	src homology 2 domain-containing transforming protein B [Source:MGI Symbol;Acc:MGI:98294]
ENSMUSG00000096210	-0.761164	6.5765	7.55488	0.00598477	0.0669418	chr15	+	79028212	79030498	NM_008197	H1f0	H1 histone family, member 0 [Source:MGI Symbol;Acc:MGI:95893]
ENSMUSG00000031431	-0.761352	6.33077	8.27071	0.00402898	0.0552578	chrX	-	140542668	140539528	NR_122039	Tsc22d3	TSC22 domain family, member 3 [Source:MGI Symbol;Acc:MGI:1196284]
ENSMUSG00000037349	-0.766445	3.69307	7.68594	0.00556528	0.0645855	chr19	-	6996037	6993018	NM_026675	Nudt22	nudix (nucleoside diphosphate linked moiety X)-type motif 22 [Source:MGI Symbol;Acc:MGI:1915573]
ENSMUSG00000022244	-0.767533	5.32461	15.3158	9.09513e-05	0.00546478	chr15	+	10981756	10996624	NM_008537	Amacr	alpha-methylacyl-CoA racemase [Source:MGI Symbol;Acc:MGI:1098273]
ENSMUSG00000039246	-0.768243	2.24505	6.74569	0.00939744	0.0835611	chr1	-	186117310	186087731	NM_146106	Lyplal1	lysophospholipase-like 1 [Source:MGI Symbol;Acc:MGI:2385115]
ENSMUSG00000033857	-0.76931	2.09322	6.41275	0.0113304	0.0914641	chr11	+	118476829	118489209	NM_172573	Engase	endo-beta-N-acetylglucosaminidase [Source:MGI Symbol;Acc:MGI:2443788]
ENSMUSG00000064215	-0.769983	4.48555	13.7769	0.000205849	0.0095597	chr12	+	103434211	103440207	NM_194066	Ifi27	interferon, alpha-inducible protein 27 [Source:MGI Symbol;Acc:MGI:1277180]
ENSMUSG00000008035	-0.77061	5.63667	10.1206	0.0014662	0.0310952	chrX	+	10717390	10719690	NM_001166635	Mid1ip1	Mid1 interacting protein 1 (gastrulation specific G12-like (zebrafish)) [Source:MGI Symbol;Acc:MGI:1915291]
ENSMUSG00000027944	-0.774274	6.29659	11.949	0.000546765	0.0177533	chr3	-	89998697	89995446	NM_011826	Hax1	HCLS1 associated X-1 [Source:MGI Symbol;Acc:MGI:1346319]
ENSMUSG00000024953	-0.774279	6.92765	17.0368	3.66616e-05	0.00284201	chr19	-	6910106	6906706	NM_012021	Prdx5	peroxiredoxin 5 [Source:MGI Symbol;Acc:MGI:1859821]
ENSMUSG00000025085	-0.774354	8.11717	6.83638	0.00893198	0.081532	chr19	-	57216032	57032733	NM_178688	Ablim1	actin-binding LIM protein 1 [Source:MGI Symbol;Acc:MGI:1194500]
ENSMUSG00000006095	-0.774886	5.62155	15.5163	8.17972e-05	0.00511068	chr7	-	30232272	30224131	NM_025548	Tbcb	tubulin folding cofactor B [Source:MGI Symbol;Acc:MGI:1913661]
ENSMUSG00000003865	-0.774982	7.57138	12.5749	0.000390963	0.0144808	chr7	+	45434844	45456619	NM_030678	Gys1	glycogen synthase 1, muscle [Source:MGI Symbol;Acc:MGI:101805]
ENSMUSG00000028420	-0.774993	5.60309	9.00249	0.00269613	0.0450398	chr4	+	53826045	53862019	NM_028053	Tmem38b	transmembrane protein 38B [Source:MGI Symbol;Acc:MGI:1098718]
ENSMUSG00000027257	-0.775346	7.55531	6.10728	0.0134626	0.0988989	chr2	+	91257329	91264679	NM_028733	Pacsin3	protein kinase C and casein kinase substrate in neurons 3 [Source:MGI Symbol;Acc:MGI:1891410]
ENSMUSG00000025855	-0.775874	4.06072	7.47116	0.0062695	0.0683385	chr5	-	139129759	139017306	NM_008923	Prkar1b	protein kinase, cAMP dependent regulatory, type I beta [Source:MGI Symbol;Acc:MGI:97759]
ENSMUSG00000016252	-0.777485	6.53311	11.5371	0.000682204	0.0200942	chr2	-	174464105	174461072	NM_025983	Atp5e	ATP synthase, H+ transporting, mitochondrial F1 complex, epsilon subunit [Source:MGI Symbol;Acc:MGI:1855697]
ENSMUSG00000026471	-0.780644	1.94389	6.2353	0.0125228	0.0953459	chr1	-	155146783	155127878	NM_008209	Mr1	major histocompatibility complex, class I-related [Source:MGI Symbol;Acc:MGI:1195463]
ENSMUSG00000027165	-0.781683	3.9695	8.07504	0.0044879	0.0581717	chr2	-	101628990	101560781	NM_026592	B230118H07Rik	RIKEN cDNA B230118H07 gene [Source:MGI Symbol;Acc:MGI:1915420]
ENSMUSG00000008575	-0.782144	4.59061	6.37009	0.011606	0.0926306	chr4	-	82505770	82290173	NM_001286127	Nfib	nuclear factor I/B [Source:MGI Symbol;Acc:MGI:103188]
ENSMUSG00000030588	-0.783266	5.24273	13.7786	0.000205671	0.0095597	chr7	+	29238329	29247529	NM_001110201	Yif1b	Yip1 interacting factor homolog B (S. cerevisiae) [Source:MGI Symbol;Acc:MGI:1924504]
ENSMUSG00000022386	-0.785815	3.67844	12.051	0.000517659	0.0172149	chr15	+	85879320	85897392	NM_028063	Trmu	tRNA 5-methylaminomethyl-2-thiouridylate methyltransferase [Source:MGI Symbol;Acc:MGI:1919276]
ENSMUSG00000020571	-0.786515	8.77767	11.1345	0.000847345	0.0229681	chr12	+	17266545	17284770	NM_027959	Pdia6	protein disulfide isomerase associated 6 [Source:MGI Symbol;Acc:MGI:1919103]
ENSMUSG00000027630	-0.786666	7.45985	12.8446	0.000338455	0.0135065	chr3	+	22076727	22212751	NM_030732	Tbl1xr1	transducin (beta)-like 1X-linked receptor 1 [Source:MGI Symbol;Acc:MGI:2441730]
ENSMUSG00000005469	-0.787523	8.63028	10.1458	0.00144631	0.030902	chr8	+	83972978	83996445	NM_008854	Prkaca	protein kinase, cAMP dependent, catalytic, alpha [Source:MGI Symbol;Acc:MGI:97592]
ENSMUSG00000062077	-0.789192	6.28891	8.72133	0.00314508	0.0486155	chr5	+	31116712	31137628	NM_021447	Trim54	tripartite motif-containing 54 [Source:MGI Symbol;Acc:MGI:1889623]
ENSMUSG00000095687	-0.789857	2.3248	8.13856	0.00433337	0.0576644	chr17	-	8148097	8128610	NM_001083938	Rnaset2a	ribonuclease T2A [Source:MGI Symbol;Acc:MGI:1915445]
ENSMUSG00000026094	-0.790438	7.46375	6.47904	0.0109154	0.0893677	chr1	-	53785224	53755506	NM_133810	Stk17b	serine/threonine kinase 17b (apoptosis-inducing) [Source:MGI Symbol;Acc:MGI:2138162]
ENSMUSG00000021287	-0.790509	3.31666	7.2477	0.0070992	0.0725628	chr12	-	111813841	111803193	NM_028875	Xrcc3	X-ray repair complementing defective repair in Chinese hamster cells 3 [Source:MGI Symbol;Acc:MGI:1921585]
ENSMUSG00000026479	-0.790953	3.3053	6.88118	0.00871079	0.0801199	chr1	-	153186447	153122756	NM_008485	Lamc2	laminin, gamma 2 [Source:MGI Symbol;Acc:MGI:99913]
ENSMUSG00000037032	-0.791777	6.13577	12.7183	0.00036209	0.0141307	chr7	-	105581653	105558483	NM_009685	Apbb1	amyloid beta (A4) precursor protein-binding, family B, member 1 [Source:MGI Symbol;Acc:MGI:107765]
ENSMUSG00000024885	-0.791865	4.96587	7.43161	0.0064088	0.0691223	chr19	-	3929761	3913493	NM_026316	Aldh3b1	aldehyde dehydrogenase 3 family, member B1 [Source:MGI Symbol;Acc:MGI:1914939]
ENSMUSG00000025190	-0.792862	6.6995	10.6465	0.00110277	0.0260847	chr19	-	43524605	43499752	NM_010324	Got1	glutamic-oxaloacetic transaminase 1, soluble [Source:MGI Symbol;Acc:MGI:95791]
ENSMUSG00000036006	-0.793402	4.95087	6.60654	0.0101605	0.0866361	chr13	+	24582189	24733816	NM_001286100	Fam65b	family with sequence similarity 65, member B [Source:MGI Symbol;Acc:MGI:2444879]
ENSMUSG00000021368	-0.795813	3.76115	8.49815	0.00355508	0.0516803	chr13	-	43171501	43151744	NM_001252640	Tbc1d7	TBC1 domain family, member 7 [Source:MGI Symbol;Acc:MGI:1914296]
ENSMUSG00000045954	-0.79706	8.38673	8.56626	0.0034245	0.0506753	chr1	+	51289126	51302960	NM_138741	Sdpr	serum deprivation response [Source:MGI Symbol;Acc:MGI:99513]
ENSMUSG00000042770	-0.799992	3.4246	6.72693	0.00949678	0.084041	chr6	-	135168215	135137519	NM_013546	Hebp1	heme binding protein 1 [Source:MGI Symbol;Acc:MGI:1333880]
ENSMUSG00000027107	-0.800057	11.1122	11.995	0.000533439	0.0175475	chr2	-	73580338	73563215	NM_007389	Chrna1	cholinergic receptor, nicotinic, alpha polypeptide 1 (muscle) [Source:MGI Symbol;Acc:MGI:87885]
ENSMUSG00000004610	-0.800196	6.50079	11.7695	0.000602107	0.018452	chr7	+	43444108	43457800	NM_026695	Etfb	electron transferring flavoprotein, beta polypeptide [Source:MGI Symbol;Acc:MGI:106098]
ENSMUSG00000032507	-0.801334	4.77484	8.14657	0.00431426	0.0576051	chr9	-	114026761	113976707	NM_178624	Fbxl2	F-box and leucine-rich repeat protein 2 [Source:MGI Symbol;Acc:MGI:1919429]
ENSMUSG00000046909	-0.801695	4.06015	10.3422	0.00130021	0.0290866	chr11	-	80142175	80136678	NM_183275	Tefm	transcription elongation factor, mitochondrial [Source:MGI Symbol;Acc:MGI:1915800]
ENSMUSG00000030979	-0.803259	4.96754	12.9254	0.000324158	0.0131481	chr7	-	133709069	133686356	NM_001302087	Uros	uroporphyrinogen III synthase [Source:MGI Symbol;Acc:MGI:98917]
ENSMUSG00000044502	-0.80953	6.8469	10.5961	0.00113324	0.0264367	chr11	-	31671885	31665181	NM_001024919	Bod1	biorientation of chromosomes in cell division 1 [Source:MGI Symbol;Acc:MGI:1916806]
ENSMUSG00000004032	-0.810234	5.48394	15.5848	7.88862e-05	0.00503042	chr3	+	107895821	107898686	NM_010360	Gstm5	glutathione S-transferase, mu 5 [Source:MGI Symbol;Acc:MGI:1309466]
ENSMUSG00000039542	-0.81025	10.103	10.1209	0.00146596	0.0310952	chr9	-	49798925	49502136	NM_001081445	Ncam1	neural cell adhesion molecule 1 [Source:MGI Symbol;Acc:MGI:97281]
ENSMUSG00000050288	-0.810881	5.18367	8.45701	0.00363639	0.0523398	chr11	+	102604396	102608058	NM_020510	Fzd2	frizzled homolog 2 (Drosophila) [Source:MGI Symbol;Acc:MGI:1888513]
ENSMUSG00000028672	-0.812134	4.66291	8.19298	0.00420527	0.0566704	chr4	+	135946448	135962617	NM_008254	Hmgcl	3-hydroxy-3-methylglutaryl-Coenzyme A lyase [Source:MGI Symbol;Acc:MGI:96158]
ENSMUSG00000028517	-0.81259	5.81613	8.85018	0.00293059	0.0469009	chr4	+	105157347	105232764	NM_080555	Ppap2b	phosphatidic acid phosphatase type 2B [Source:MGI Symbol;Acc:MGI:1915166]
ENSMUSG00000047342	-0.812808	2.53549	6.54786	0.010501	0.0879434	chr11	-	62789462	62778387	NM_138949	Zfp286	zinc finger protein 286 [Source:MGI Symbol;Acc:MGI:2384758]
ENSMUSG00000034617	-0.815068	5.24458	13.9569	0.000187047	0.0091838	chr13	-	68582121	68560780	NM_172480	Mtrr	5-methyltetrahydrofolate-homocysteine methyltransferase reductase [Source:MGI Symbol;Acc:MGI:1891037]
ENSMUSG00000044881	-0.816925	2.4604	7.9834	0.00472082	0.0595679	chr7	+	100537100	100540369	NM_183270	Coa4	cytochrome c oxidase assembly factor 4 [Source:MGI Symbol;Acc:MGI:1915435]
ENSMUSG00000042406	-0.821118	8.53949	10.8819	0.000971092	0.0247699	chr15	+	80255184	80257540	NM_001287180	Atf4	activating transcription factor 4 [Source:MGI Symbol;Acc:MGI:88096]
ENSMUSG00000044894	-0.821153	6.22346	8.5826	0.00339391	0.050343	chr11	-	53430827	53428953	NM_025352	Uqcrq	ubiquinol-cytochrome c reductase, complex III subunit VII [Source:MGI Symbol;Acc:MGI:107807]
ENSMUSG00000021809	-0.821316	2.68651	6.59052	0.0102523	0.0868116	chr14	+	20294690	20317575	NM_026341	Nudt13	nudix (nucleoside diphosphate linked moiety X)-type motif 13 [Source:MGI Symbol;Acc:MGI:1914975]
ENSMUSG00000023175	-0.822862	8.83504	13.8834	0.000194509	0.00939949	chr10	+	79704491	79711969	NM_001077184	Bsg	basigin [Source:MGI Symbol;Acc:MGI:88208]
ENSMUSG00000030316	-0.82495	4.70665	14.8304	0.000117625	0.00667496	chr6	-	115037876	115004381	NM_026894	Tamm41	TAM41, mitochondrial translocator assembly and maintenance protein, homolog (S. cerevisiae) [Source:MGI Symbol;Acc:MGI:1916221]
ENSMUSG00000045107	-0.826248	3.2905	8.13562	0.00434039	0.0576644	chr14	-	20083172	20075646	NM_026209	Saysd1	SAYSVFN motif domain containing 1 [Source:MGI Symbol;Acc:MGI:1914759]
ENSMUSG00000045268	-0.830909	3.24044	10.8969	0.000963238	0.0246713	chr4	-	119173856	119169513	NM_183140	Zfp691	zinc finger protein 691 [Source:MGI Symbol;Acc:MGI:3041163]
ENSMUSG00000028466	-0.832035	6.41507	10.6599	0.0010948	0.0259653	chr4	+	43562332	43567060	NM_013497	Creb3	cAMP responsive element binding protein 3 [Source:MGI Symbol;Acc:MGI:99946]
ENSMUSG00000025545	-0.832581	3.9379	8.72048	0.00314655	0.0486155	chr14	+	122181694	122402232	NM_029556	Clybl	citrate lyase beta like [Source:MGI Symbol;Acc:MGI:1916884]
ENSMUSG00000026833	-0.834706	6.82087	10.4902	0.00120007	0.0273408	chr2	+	28205659	28230736	NM_019498	Olfm1	olfactomedin 1 [Source:MGI Symbol;Acc:MGI:1860437]
ENSMUSG00000032850	-0.836254	2.53668	8.37081	0.00381296	0.0536634	chr5	-	118244861	118190736	NM_172998	Rnft2	ring finger protein, transmembrane 2 [Source:MGI Symbol;Acc:MGI:2442859]
ENSMUSG00000022090	-0.836334	5.38139	7.25528	0.0070693	0.0724559	chr14	-	70177681	70164218	NM_145978	Pdlim2	PDZ and LIM domain 2 [Source:MGI Symbol;Acc:MGI:2384850]
ENSMUSG00000055435	-0.83899	4.15087	6.37247	0.0115904	0.092566	chr8	-	115707794	115701435	NM_001025577	Maf	avian musculoaponeurotic fibrosarcoma (v-maf) AS42 oncogene homolog [Source:MGI Symbol;Acc:MGI:96909]
ENSMUSG00000028664	-0.840871	6.07774	8.49532	0.0035606	0.0516998	chr4	-	136835988	136647539	NM_010142	Ephb2	Eph receptor B2 [Source:MGI Symbol;Acc:MGI:99611]
ENSMUSG00000031543	-0.841421	7.53691	11.069	0.000877808	0.0233034	chr8	+	22974844	23149933	NM_001277280	Ank1	ankyrin 1, erythroid [Source:MGI Symbol;Acc:MGI:88024]
ENSMUSG00000031023	-0.842742	4.48184	11.3192	0.000767112	0.0217659	chr7	+	109703690	109712189	NM_020616	Akip1	A kinase (PRKA) interacting protein 1 [Source:MGI Symbol;Acc:MGI:3041226]
ENSMUSG00000027253	-0.843337	7.75135	9.45439	0.00210645	0.0384916	chr2	+	91457511	91513779	NM_172668	Lrp4	low density lipoprotein receptor-related protein 4 [Source:MGI Symbol;Acc:MGI:2442252]
ENSMUSG00000049521	-0.845156	6.73075	11.1752	0.00082898	0.0227391	chr15	+	78842647	78850902	NM_027219	Cdc42ep1	CDC42 effector protein (Rho GTPase binding) 1 [Source:MGI Symbol;Acc:MGI:1929763]
ENSMUSG00000017837	-0.850301	6.12639	18.6592	1.56291e-05	0.00166679	chr11	+	100622876	100627607	NM_028024	Nkiras2	NFKB inhibitor interacting Ras-like protein 2 [Source:MGI Symbol;Acc:MGI:1919216]
ENSMUSG00000020589	-0.850436	3.96765	7.71706	0.00547014	0.0640096	chr12	+	12262139	12376359	NM_029758	Fam49a	family with sequence similarity 49, member A [Source:MGI Symbol;Acc:MGI:1261783]
ENSMUSG00000014905	-0.851278	4.79315	9.80537	0.00174003	0.0346076	chr12	-	44210068	44205897	NM_013760	Dnajb9	DnaJ (Hsp40) homolog, subfamily B, member 9 [Source:MGI Symbol;Acc:MGI:1351618]
ENSMUSG00000018983	-0.852379	6.02337	10.6825	0.00108154	0.025913	chr4	+	136172394	136196057	NM_177733	E2f2	E2F transcription factor 2 [Source:MGI Symbol;Acc:MGI:1096341]
ENSMUSG00000047617	-0.852552	4.51655	6.41429	0.0113205	0.0914641	chr2	-	25461094	25459482	NM_153557	BC029214	cDNA sequence BC029214 [Source:MGI Symbol;Acc:MGI:2442831]
ENSMUSG00000034271	-0.856438	5.86668	11.0045	0.000908909	0.0237719	chr12	+	85599105	85639878	NM_001205052	Jdp2	Jun dimerization protein 2 [Source:MGI Symbol;Acc:MGI:1932093]
ENSMUSG00000030249	-0.864628	6.84813	7.28258	0.00696266	0.0720193	chr6	-	142702274	142587862	NM_021041	Abcc9	ATP-binding cassette, sub-family C (CFTR/MRP), member 9 [Source:MGI Symbol;Acc:MGI:1352630]
ENSMUSG00000015312	-0.86544	4.77099	10.8109	0.00100906	0.0252516	chr10	+	80930091	80932204	NM_008655	Gadd45b	growth arrest and DNA-damage-inducible 45 beta [Source:MGI Symbol;Acc:MGI:107776]
ENSMUSG00000053398	-0.865559	9.23389	16.6232	4.559e-05	0.00335711	chr3	-	98339990	98313170	NM_016966	Phgdh	3-phosphoglycerate dehydrogenase [Source:MGI Symbol;Acc:MGI:1355330]
ENSMUSG00000060703	-0.866421	3.63354	12.675	0.000370577	0.0141582	chr2	-	60284488	60251993	NM_001290660	Cd302	CD302 antigen [Source:MGI Symbol;Acc:MGI:1913455]
ENSMUSG00000009487	-0.868793	5.21686	11.0095	0.000906439	0.0237719	chr7	+	46240987	46311434	NM_013624	Otog	otogelin [Source:MGI Symbol;Acc:MGI:1202064]
ENSMUSG00000025485	-0.869678	7.04324	16.9265	3.88559e-05	0.00296998	chr7	+	140856957	140863730	NM_053194	Ric8	resistance to inhibitors of cholinesterase 8 homolog (C. elegans) [Source:MGI Symbol;Acc:MGI:2141866]
ENSMUSG00000022091	-0.870347	3.27051	6.7761	0.00923866	0.0826393	chr14	-	70207637	70180468	NM_001271408	Sorbs3	sorbin and SH3 domain containing 3 [Source:MGI Symbol;Acc:MGI:700013]
ENSMUSG00000030532	-0.873171	1.90913	6.49685	0.0108066	0.0888883	chr7	+	80343137	80346097	NM_026812	Hddc3	HD domain containing 3 [Source:MGI Symbol;Acc:MGI:1915945]
ENSMUSG00000049536	-0.87383	3.69299	7.48085	0.00623585	0.0683063	chrX	+	136707982	136711478	NM_146236	Tceal1	transcription elongation factor A (SII)-like 1 [Source:MGI Symbol;Acc:MGI:2385317]
ENSMUSG00000036214	-0.874237	2.78463	6.62899	0.0100332	0.0860371	chr17	+	36958592	36965622	NM_029602	Znrd1as	Znrd1 antisense [Source:MGI Symbol;Acc:MGI:1923666]
ENSMUSG00000025007	-0.87801	7.25631	14.4843	0.000141336	0.00766872	chr19	-	40588369	40550257	NM_153554	Aldh18a1	aldehyde dehydrogenase 18 family, member A1 [Source:MGI Symbol;Acc:MGI:1888908]
ENSMUSG00000037139	-0.879158	8.90903	7.41649	0.00646287	0.0692227	chr4	+	135759715	135815564	NM_001085509	Myom3	myomesin family, member 3 [Source:MGI Symbol;Acc:MGI:2685280]
ENSMUSG00000091803	-0.880125	1.3482	6.21155	0.012692	0.0956662	chr12	-	81485120	81470704	NM_025461	Cox16	cytochrome c oxidase assembly protein 16 [Source:MGI Symbol;Acc:MGI:1913522]
ENSMUSG00000023046	-0.880858	4.36285	11.8144	0.000587749	0.0182399	chr15	+	102144362	102149511	NM_008344	Igfbp6	insulin-like growth factor binding protein 6 [Source:MGI Symbol;Acc:MGI:96441]
ENSMUSG00000022508	-0.882553	6.42047	13.8251	0.000200642	0.00943781	chr16	-	23988852	23965052	NM_009744	Bcl6	B cell leukemia/lymphoma 6 [Source:MGI Symbol;Acc:MGI:107187]
ENSMUSG00000000340	-0.884123	4.27949	10.9252	0.000948671	0.0244632	chr3	+	116513070	116549981	NM_010022	Dbt	dihydrolipoamide branched chain transacylase E2 [Source:MGI Symbol;Acc:MGI:105386]
ENSMUSG00000074884	-0.886515	8.57935	14.6848	0.00012707	0.00711304	chr2	+	121449195	121453420	NM_011354	Serf2	small EDRK-rich factor 2 [Source:MGI Symbol;Acc:MGI:1337041]
ENSMUSG00000070283	-0.886659	4.04378	8.9308	0.00280402	0.0457232	chr9	-	108567434	108565537	NM_023247	Ndufaf3	NADH dehydrogenase (ubiquinone) 1 alpha subcomplex, assembly factor 3 [Source:MGI Symbol;Acc:MGI:1913956]
ENSMUSG00000041028	-0.887304	8.4948	17.9758	2.23736e-05	0.00206555	chr14	-	37135139	37120444	NM_001199122	Ghitm	growth hormone inducible transmembrane protein [Source:MGI Symbol;Acc:MGI:1913342]
ENSMUSG00000068015	-0.891378	4.77249	12.739	0.000358115	0.0140198	chr14	-	74947877	74754674	NM_001252132	Lrch1	leucine-rich repeats and calponin homology (CH) domain containing 1 [Source:MGI Symbol;Acc:MGI:2443390]
ENSMUSG00000031990	-0.892551	7.06565	16.5282	4.79315e-05	0.00349765	chr9	-	27155421	27097385	NM_023277	Jam3	junction adhesion molecule 3 [Source:MGI Symbol;Acc:MGI:1933825]
ENSMUSG00000056216	-0.892888	5.69981	6.68576	0.00971863	0.0848126	chr7	-	35056503	35046422	NM_009884	Cebpg	CCAAT/enhancer binding protein (C/EBP), gamma [Source:MGI Symbol;Acc:MGI:104982]
ENSMUSG00000029777	-0.898359	8.76036	18.3015	1.88557e-05	0.00186086	chr6	+	55038001	55079504	NM_180678	Gars	glycyl-tRNA synthetase [Source:MGI Symbol;Acc:MGI:2449057]
ENSMUSG00000044461	-0.902605	7.77466	14.2331	0.000161506	0.00845022	chr14	+	59625281	59631658	NM_145463	Shisa2	shisa family member 2 [Source:MGI Symbol;Acc:MGI:2444716]
ENSMUSG00000026142	-0.902639	6.07666	17.0319	3.6757e-05	0.00284201	chr1	+	82316452	82445366	NM_029777	Rhbdd1	rhomboid domain containing 1 [Source:MGI Symbol;Acc:MGI:1924117]
ENSMUSG00000026939	-0.903238	2.89309	7.87151	0.00502198	0.0612692	chr2	-	25622005	25620067	NM_001109993	Tmem141	transmembrane protein 141 [Source:MGI Symbol;Acc:MGI:1098773]
ENSMUSG00000031901	-0.903917	4.20742	10.6273	0.0011143	0.0262294	chr8	+	106011507	106053819	NM_025518	Dus2	dihydrouridine synthase 2 [Source:MGI Symbol;Acc:MGI:1913619]
ENSMUSG00000060519	-0.905727	5.93709	12.8985	0.000328853	0.0131658	chr1	-	156674356	156653617	NM_023141	Tor3a	torsin family 3, member A [Source:MGI Symbol;Acc:MGI:1353652]
ENSMUSG00000030598	-0.909073	4.2882	6.88518	0.00869136	0.0800006	chr7	+	28716804	28738144	NM_015796	Fbxo17	F-box protein 17 [Source:MGI Symbol;Acc:MGI:1354707]
ENSMUSG00000097350	-0.909893	1.77918	6.22527	0.012594	0.0954987	chr17	+	12318885	12327250	NR_045290	4732491K20Rik	RIKEN cDNA 4732491K20 gene [Source:MGI Symbol;Acc:MGI:3026975]
ENSMUSG00000057234	-0.911718	2.24814	10.6617	0.00109377	0.0259653	chr2	-	109278290	109092297	NM_029790	Mettl15	methyltransferase like 15 [Source:MGI Symbol;Acc:MGI:1924144]
ENSMUSG00000032575	-0.913869	6.98615	12.6937	0.00036688	0.0141582	chr9	-	106891979	106887415	NM_029103	Manf	mesencephalic astrocyte-derived neurotrophic factor [Source:MGI Symbol;Acc:MGI:1922090]
ENSMUSG00000031295	-0.914524	6.25716	16.2367	5.59008e-05	0.00397131	chrX	+	160502434	160591141	NM_172783	Phka2	phosphorylase kinase alpha 2 [Source:MGI Symbol;Acc:MGI:97577]
ENSMUSG00000027861	-0.916618	10.6219	6.63556	0.00999627	0.0859691	chr3	+	102086415	102146514	NM_009814	Casq2	calsequestrin 2 [Source:MGI Symbol;Acc:MGI:1309469]
ENSMUSG00000078566	-0.917404	7.18119	8.71165	0.00316182	0.0486468	chr7	-	138909506	138890836	NM_009760	Bnip3	BCL2/adenovirus E1B interacting protein 3 [Source:MGI Symbol;Acc:MGI:109326]
ENSMUSG00000031962	-0.920224	9.10248	15.7761	7.12974e-05	0.00472763	chr8	+	122848374	122867397	NM_007662	Cdh15	cadherin 15 [Source:MGI Symbol;Acc:MGI:106672]
ENSMUSG00000029456	-0.921245	3.30356	8.4351	0.00368047	0.0526298	chr5	-	121660514	121621028	NM_028037	Acad10	acyl-Coenzyme A dehydrogenase family, member 10 [Source:MGI Symbol;Acc:MGI:1919235]
ENSMUSG00000042515	-0.921489	6.87157	17.8929	2.33696e-05	0.00212577	chrX	+	139210042	139238333	NM_001164630	Mum1l1	melanoma associated antigen (mutated) 1-like 1 [Source:MGI Symbol;Acc:MGI:2445062]
ENSMUSG00000038213	-0.921915	2.66995	7.34314	0.00673192	0.07094	chr6	-	125231860	125223933	NM_145391	Tapbpl	TAP binding protein-like [Source:MGI Symbol;Acc:MGI:2384853]
ENSMUSG00000038271	-0.923577	7.39361	15.6414	7.65601e-05	0.00493294	chr6	+	125145244	125161774	NM_001039669	Iffo1	intermediate filament family orphan 1 [Source:MGI Symbol;Acc:MGI:2444516]
ENSMUSG00000039742	-0.924969	1.10784	6.11099	0.0134344	0.0988492	chr6	+	29319140	29336019	NM_207258	Fam71f1	family with sequence similarity 71, member F1 [Source:MGI Symbol;Acc:MGI:3032524]
ENSMUSG00000037902	-0.925515	4.88883	11.9231	0.000554435	0.017911	chr2	+	129592839	129632220	NM_001291020	Sirpa	signal-regulatory protein alpha [Source:MGI Symbol;Acc:MGI:108563]
ENSMUSG00000037071	-0.926164	5.21459	11.7988	0.000592677	0.0182843	chr19	-	44407709	44394451	NM_009127	Scd1	stearoyl-Coenzyme A desaturase 1 [Source:MGI Symbol;Acc:MGI:98239]
ENSMUSG00000022856	-0.929871	3.69581	11.8505	0.000576464	0.0181001	chr16	-	21947552	21934327	NM_025693	Tmem41a	transmembrane protein 41a [Source:MGI Symbol;Acc:MGI:1913914]
ENSMUSG00000072945	-0.930559	4.65164	7.98232	0.00472363	0.0595679	chrX	-	139782353	139779549	NM_001037915	Ripply1	ripply1 homolog (zebrafish) [Source:MGI Symbol;Acc:MGI:3614797]
ENSMUSG00000020722	-0.931853	7.33129	11.9131	0.00055741	0.017911	chr11	-	107716522	107703218	NM_007582	Cacng1	calcium channel, voltage-dependent, gamma subunit 1 [Source:MGI Symbol;Acc:MGI:1206582]
ENSMUSG00000059743	-0.933909	3.94297	12.097	0.000505043	0.0168862	chr3	-	89101888	89093588	NM_001253751	Fdps	farnesyl diphosphate synthetase [Source:MGI Symbol;Acc:MGI:104888]
ENSMUSG00000018648	-0.937573	5.78883	13.8729	0.000195602	0.00941553	chr11	-	84068357	84048041	NM_019819	Dusp14	dual specificity phosphatase 14 [Source:MGI Symbol;Acc:MGI:1927168]
ENSMUSG00000079110	-0.941385	6.57957	8.09178	0.00444664	0.0580268	chr2	+	120463579	120504913	NM_007601	Capn3	calpain 3 [Source:MGI Symbol;Acc:MGI:107437]
ENSMUSG00000010067	-0.941646	5.77442	17.2776	3.22978e-05	0.00266371	chr9	+	107551555	107562267	NM_001243748	Rassf1	Ras association (RalGDS/AF-6) domain family member 1 [Source:MGI Symbol;Acc:MGI:1928386]
ENSMUSG00000090213	-0.943608	6.14765	13.5526	0.000231966	0.0103225	chr2	-	167661556	167642608	NM_145538	Tmem189	transmembrane protein 189 [Source:MGI Symbol;Acc:MGI:2142624]
ENSMUSG00000075590	-0.944377	3.43329	9.38695	0.00218536	0.0394097	chr15	-	76090013	76085595	NM_144847	Nrbp2	nuclear receptor binding protein 2 [Source:MGI Symbol;Acc:MGI:2385017]
ENSMUSG00000058258	-0.94444	7.11621	11.4211	0.000726144	0.0208425	chr13	+	8885501	8892451	NM_145360	Idi1	isopentenyl-diphosphate delta isomerase [Source:MGI Symbol;Acc:MGI:2442264]
ENSMUSG00000036390	-0.944511	7.79303	11.808	0.000589763	0.0182399	chr6	-	67037406	67035096	NM_007836	Gadd45a	growth arrest and DNA-damage-inducible 45 alpha [Source:MGI Symbol;Acc:MGI:107799]
ENSMUSG00000097487	-0.945127	3.61465	7.63012	0.00574014	0.0656297	chr11	-	101425333	101418812	NM_026865	Ptges3l	prostaglandin E synthase 3 (cytosolic)-like [Source:MGI Symbol;Acc:MGI:1916146]
ENSMUSG00000022519	-0.945134	10.5647	8.04228	0.00456981	0.0589325	chr16	-	4523075	4480228	NM_175347	Srl	sarcalumenin [Source:MGI Symbol;Acc:MGI:2146620]
ENSMUSG00000037846	-0.959714	4.25632	12.932	0.000323011	0.0131481	chr10	+	67979598	68043864	NM_001081346	Rtkn2	rhotekin 2 [Source:MGI Symbol;Acc:MGI:2158417]
ENSMUSG00000031461	-0.961291	9.52757	8.46076	0.0036289	0.0523398	chr8	+	15057653	15133541	NM_008664	Myom2	myomesin 2 [Source:MGI Symbol;Acc:MGI:1328358]
ENSMUSG00000020475	-0.962336	7.59299	6.68993	0.00969589	0.084709	chr11	-	5803733	5801640	NM_018870	Pgam2	phosphoglycerate mutase 2 [Source:MGI Symbol;Acc:MGI:1933118]
ENSMUSG00000026675	-0.962577	6.38352	17.3165	3.16421e-05	0.00262714	chr1	-	169969241	169949535	NM_010476	Hsd17b7	hydroxysteroid (17-beta) dehydrogenase 7 [Source:MGI Symbol;Acc:MGI:1330808]
ENSMUSG00000031312	-0.969361	7.88545	7.52034	0.00610063	0.0678553	chrX	+	101449088	101453541	NM_013712	Itgb1bp2	integrin beta 1 binding protein 2 [Source:MGI Symbol;Acc:MGI:1353420]
ENSMUSG00000040466	-0.969743	3.56768	8.99706	0.00270414	0.0450398	chr7	+	27447978	27466144	NM_144923	Blvrb	biliverdin reductase B (flavin reductase (NADPH)) [Source:MGI Symbol;Acc:MGI:2385271]
ENSMUSG00000020182	-0.970695	5.26981	9.32827	0.00225645	0.0402227	chr11	-	11890408	11814103	NM_016672	Ddc	dopa decarboxylase [Source:MGI Symbol;Acc:MGI:94876]
ENSMUSG00000004035	-0.971058	1.42167	6.34013	0.0118036	0.0935445	chr3	-	107931817	107926334	NM_026672	Gstm7	glutathione S-transferase, mu 7 [Source:MGI Symbol;Acc:MGI:1915562]
ENSMUSG00000021451	-0.971089	4.16852	6.80923	0.00906878	0.0822053	chr13	-	51793673	51701246	NM_001281880	Sema4d	sema domain, immunoglobulin domain (Ig), transmembrane domain (TM) and short cytoplasmic domain, (semaphorin) 4D [Source:MGI Symbol;Acc:MGI:109244]
ENSMUSG00000052572	-0.971563	3.8499	8.62089	0.00332329	0.0498937	chr7	+	91090706	92447003	NM_011807	Dlg2	discs, large homolog 2 (Drosophila) [Source:MGI Symbol;Acc:MGI:1344351]
ENSMUSG00000023272	-0.973625	5.60997	12.6738	0.000370808	0.0141582	chr15	+	88819646	88826681	NM_029720	Creld2	cysteine-rich with EGF-like domains 2 [Source:MGI Symbol;Acc:MGI:1923987]
ENSMUSG00000021453	-0.974008	6.64301	9.83263	0.00171443	0.0342743	chr13	+	51846678	51848468	NM_011817	Gadd45g	growth arrest and DNA-damage-inducible 45 gamma [Source:MGI Symbol;Acc:MGI:1346325]
ENSMUSG00000044952	-0.974135	2.29724	10.5437	0.00116583	0.0269077	chr7	+	97332327	97350213	NM_001039039	Kctd21	potassium channel tetramerisation domain containing 21 [Source:MGI Symbol;Acc:MGI:3643121]
ENSMUSG00000053460	-0.977787	5.25661	20.1327	7.22511e-06	0.000982218	chr6	+	72414308	72430712	NM_019802	Ggcx	gamma-glutamyl carboxylase [Source:MGI Symbol;Acc:MGI:1927655]
ENSMUSG00000055926	-0.97814	3.85242	6.44098	0.0111517	0.0905237	chr2	+	119174509	119177575	NM_001039223	Gm14137	predicted gene 14137 [Source:MGI Symbol;Acc:MGI:3651144]
ENSMUSG00000036782	-0.983232	8.46028	6.63367	0.0100069	0.0859691	chrX	-	23285559	23219285	NM_001290476	Klhl13	kelch-like 13 [Source:MGI Symbol;Acc:MGI:1914705]
ENSMUSG00000001334	-0.987072	7.38806	14.2923	0.0001565	0.0083093	chr4	+	129136999	129144593	NM_027402	Fndc5	fibronectin type III domain containing 5 [Source:MGI Symbol;Acc:MGI:1917614]
ENSMUSG00000021768	-0.991226	5.54865	15.3163	9.09288e-05	0.00546478	chr14	-	21742879	21733395	NM_013849	Dusp13	dual specificity phosphatase 13 [Source:MGI Symbol;Acc:MGI:1351599]
ENSMUSG00000062054	-0.996161	4.5437	14.2287	0.000161887	0.00845022	chr12	+	21316392	21323605	NM_026347	Iah1	isoamyl acetate-hydrolyzing esterase 1 homolog (S. cerevisiae) [Source:MGI Symbol;Acc:MGI:1914982]
ENSMUSG00000027961	-0.99749	4.0311	6.72686	0.00949715	0.084041	chr3	+	116562973	116583134	NM_175413	Lrrc39	leucine rich repeat containing 39 [Source:MGI Symbol;Acc:MGI:1924557]
ENSMUSG00000004056	-0.998315	8.6761	19.5702	9.69694e-06	0.00126275	chr7	+	27591552	27640826	NM_001110208	Akt2	thymoma viral proto-oncogene 2 [Source:MGI Symbol;Acc:MGI:104874]
ENSMUSG00000022215	-1.00317	4.848	14.8945	0.000113695	0.00651164	chr14	+	55575617	55576952	NM_026808	Fitm1	fat storage-inducing transmembrane protein 1 [Source:MGI Symbol;Acc:MGI:1915930]
ENSMUSG00000031700	-1.00622	7.61044	18.4582	1.73672e-05	0.00179041	chr8	+	85492576	85527560	NM_173866	Gpt2	glutamic pyruvate transaminase (alanine aminotransferase) 2 [Source:MGI Symbol;Acc:MGI:1915391]
ENSMUSG00000032322	-1.01539	4.96385	8.21123	0.0041632	0.0562874	chr9	+	56089962	56128888	NM_011193	Pstpip1	proline-serine-threonine phosphatase-interacting protein 1 [Source:MGI Symbol;Acc:MGI:1321396]
ENSMUSG00000025983	-1.01658	1.20103	7.32504	0.00680005	0.0713515	chr1	+	54250683	54368727	NM_030025	Ccdc150	coiled-coil domain containing 150 [Source:MGI Symbol;Acc:MGI:1925266]
ENSMUSG00000024661	-1.02037	9.10161	12.4211	0.000424502	0.0151347	chr19	+	9982703	9985092	NM_010239	Fth1	ferritin heavy chain 1 [Source:MGI Symbol;Acc:MGI:95588]
ENSMUSG00000040618	-1.02422	5.80815	8.79953	0.00301308	0.0476052	chr14	+	55540266	55550017	NM_028994	Pck2	phosphoenolpyruvate carboxykinase 2 (mitochondrial) [Source:MGI Symbol;Acc:MGI:1860456]
ENSMUSG00000039529	-1.02939	1.10925	9.58063	0.00196641	0.0376175	chr18	-	64661000	64528979	NM_001001488	Atp8b1	ATPase, class I, type 8B, member 1 [Source:MGI Symbol;Acc:MGI:1859665]
ENSMUSG00000035642	-1.03318	6.37977	15.4089	8.65778e-05	0.00532862	chr7	-	97579496	97550340	NM_001177945	Aamdc	adipogenesis associated Mth938 domain containing [Source:MGI Symbol;Acc:MGI:1913523]
ENSMUSG00000075706	-1.03373	8.23977	16.067	6.11416e-05	0.00417891	chr10	+	80047166	80056439	NR_110342	Gpx4	glutathione peroxidase 4 [Source:MGI Symbol;Acc:MGI:104767]
ENSMUSG00000031609	-1.03738	4.68916	12.9273	0.000323823	0.0131481	chr8	-	57487860	57482707	NM_021788	Sap30	sin3 associated polypeptide [Source:MGI Symbol;Acc:MGI:1929129]
ENSMUSG00000022844	-1.03785	1.986	10.15	0.00144299	0.030902	chr16	-	35490873	35397313	NM_028295	Pdia5	protein disulfide isomerase associated 5 [Source:MGI Symbol;Acc:MGI:1919849]
ENSMUSG00000056091	-1.03819	5.25862	12.6797	0.000369645	0.0141582	chr6	+	72097592	72154571	NM_001035228	St3gal5	ST3 beta-galactoside alpha-2,3-sialyltransferase 5 [Source:MGI Symbol;Acc:MGI:1339963]
ENSMUSG00000034161	-1.03898	6.03821	8.93575	0.00279643	0.0457232	chr15	+	76457438	76459468	NM_198885	Scx	scleraxis [Source:MGI Symbol;Acc:MGI:102934]
ENSMUSG00000049872	-1.04108	1.27786	7.77457	0.00529868	0.0629078	chr10	-	34096519	34091352	NM_178908	Fam26e	family with sequence similarity 26, member E [Source:MGI Symbol;Acc:MGI:2143897]
ENSMUSG00000029446	-1.04464	5.59134	13.9285	0.000189902	0.0092491	chr5	-	129787449	129765558	NM_133900	Psph	phosphoserine phosphatase [Source:MGI Symbol;Acc:MGI:97788]
ENSMUSG00000038239	-1.05091	7.43451	9.27048	0.00232876	0.0412147	chr7	+	45335290	45338973	NM_010473	Hrc	histidine rich calcium binding protein [Source:MGI Symbol;Acc:MGI:96226]
ENSMUSG00000028644	-1.05181	3.52452	8.04093	0.00457321	0.0589325	chr4	-	119190011	119175457	NM_013848	Ermap	erythroblast membrane-associated protein [Source:MGI Symbol;Acc:MGI:1349816]
ENSMUSG00000028497	-1.05288	0.5252	7.37761	0.00660407	0.0700077	chr4	-	88438926	88412930	NM_025760	Hacd4	3-hydroxyacyl-CoA dehydratase 4 [Source:MGI Symbol;Acc:MGI:1914025]
ENSMUSG00000006542	-1.0544	6.15751	8.7623	0.0030752	0.0482171	chr1	-	74748955	74738922	NM_153744	Prkag3	protein kinase, AMP-activated, gamma 3 non-catatlytic subunit [Source:MGI Symbol;Acc:MGI:1891343]
ENSMUSG00000091898	-1.05696	10.5192	8.04982	0.00455083	0.0588894	chr14	+	31208312	31211729	NM_009393	Tnnc1	troponin C, cardiac/slow skeletal [Source:MGI Symbol;Acc:MGI:98779]
ENSMUSG00000032024	-1.05947	3.93824	11.443	0.000717621	0.0207423	chr9	+	40686012	40785319	NM_133733	Clmp	CXADR-like membrane protein [Source:MGI Symbol;Acc:MGI:1918816]
ENSMUSG00000028229	-1.06671	2.75183	11.768	0.000602586	0.018452	chr4	+	19575207	19606932	NM_025476	Rmdn1	regulator of microtubule dynamics 1 [Source:MGI Symbol;Acc:MGI:1913552]
ENSMUSG00000079037	-1.06871	7.63812	12.2835	0.000456986	0.0157368	chr2	+	131909928	131938429	NM_001278256	Prnp	prion protein [Source:MGI Symbol;Acc:MGI:97769]
ENSMUSG00000086596	-1.07133	1.47763	7.38805	0.00656588	0.0698409	chr9	+	114057354	114098733	NM_001101510	Susd5	sushi domain containing 5 [Source:MGI Symbol;Acc:MGI:2685972]
ENSMUSG00000034768	-1.07214	2.94009	7.19704	0.00730238	0.0735649	chr11	+	102268743	102279462	NM_148953	Asb16	ankyrin repeat and SOCS box-containing 16 [Source:MGI Symbol;Acc:MGI:2654437]
ENSMUSG00000028464	-1.08015	10.7391	10.8349	0.000996072	0.0250966	chr4	-	43523595	43514711	NM_001277876	Tpm2	tropomyosin 2, beta [Source:MGI Symbol;Acc:MGI:98810]
ENSMUSG00000038618	-1.08195	5.78633	13.2988	0.000265575	0.0115684	chr7	+	141215860	141218658	NM_025886	Rassf7	Ras association (RalGDS/AF-6) domain family (N-terminal) member 7 [Source:MGI Symbol;Acc:MGI:1914235]
ENSMUSG00000022075	-1.08345	5.2331	14.9614	0.000109733	0.00631401	chr14	-	69805530	69784990	NM_153514	Rhobtb2	Rho-related BTB domain containing 2 [Source:MGI Symbol;Acc:MGI:2180557]
ENSMUSG00000094724	-1.08384	1.28972	9.84296	0.00170483	0.0342378	chr17	+	6978860	6998193	NM_026611	Rnaset2b	ribonuclease T2B [Source:MGI Symbol;Acc:MGI:3702087]
ENSMUSG00000026456	-1.08471	7.85802	14.469	0.000142482	0.00769715	chr1	+	134405781	134411740	NM_028057	Cyb5r1	cytochrome b5 reductase 1 [Source:MGI Symbol;Acc:MGI:1919267]
ENSMUSG00000030672	-1.08731	11.7591	7.82415	0.00515526	0.0619181	chr7	+	127211608	127214298	NM_016754	Mylpf	myosin light chain, phosphorylatable, fast skeletal muscle [Source:MGI Symbol;Acc:MGI:97273]
ENSMUSG00000063698	-1.08753	1.20599	12.3146	0.000449424	0.0156175	chr19	-	60861479	60838748	NM_053198	Sfxn4	sideroflexin 4 [Source:MGI Symbol;Acc:MGI:2137680]
ENSMUSG00000044033	-1.09055	8.58632	17.22	3.32911e-05	0.00272744	chr2	-	77170617	77009995	NM_001025576	Ccdc141	coiled-coil domain containing 141 [Source:MGI Symbol;Acc:MGI:1919735]
ENSMUSG00000027510	-1.09409	6.16253	12.68	0.000369588	0.0141582	chr2	+	173021902	173034725	NM_019547	Rbm38	RNA binding motif protein 38 [Source:MGI Symbol;Acc:MGI:1889294]
ENSMUSG00000025823	-1.09427	8.2262	12.6364	0.000378311	0.0142252	chr6	-	47813512	47796142	NM_009787	Pdia4	protein disulfide isomerase associated 4 [Source:MGI Symbol;Acc:MGI:104864]
ENSMUSG00000087591	-1.10187	4.08226	9.83206	0.00171496	0.0342743	chrX	-	12354996	12339782	NR_045321	Gm14635	predicted gene 14635 [Source:MGI Symbol;Acc:MGI:3705138]
ENSMUSG00000052560	-1.10358	1.4383	7.14682	0.0075097	0.0749214	chr15	-	90679432	90487483	NM_025815	Cpne8	copine VIII [Source:MGI Symbol;Acc:MGI:1914121]
ENSMUSG00000030443	-1.10397	1.70769	13.0011	0.000311311	0.0128974	chr7	-	6330434	6316276	NM_001033249	Zfp583	zinc finger protein 583 [Source:MGI Symbol;Acc:MGI:2682297]
ENSMUSG00000061048	-1.11256	0.672322	7.0098	0.00810646	0.077559	chr8	+	106510913	106556908	NM_001037809	Cdh3	cadherin 3 [Source:MGI Symbol;Acc:MGI:88356]
ENSMUSG00000024892	-1.11282	5.1403	15.1704	9.82337e-05	0.0057841	chr19	+	4510472	4621752	NM_001162946	Pcx	pyruvate carboxylase [Source:MGI Symbol;Acc:MGI:97520]
ENSMUSG00000061086	-1.11311	11.5264	9.49413	0.0020613	0.0383464	chr11	+	104550663	104587215	NM_010858	Myl4	myosin, light polypeptide 4 [Source:MGI Symbol;Acc:MGI:97267]
ENSMUSG00000054484	-1.11832	5.43644	9.29012	0.00230393	0.0409231	chr2	+	120977017	121007852	NM_175285	Tmem62	transmembrane protein 62 [Source:MGI Symbol;Acc:MGI:2139461]
ENSMUSG00000100680	-1.12095	0.802102	6.685	0.00972278	0.0848126	chr6	+	91440987	91441755	NR_038153	1810044D09Rik	RIKEN cDNA 1810044D09 gene [Source:MGI Symbol;Acc:MGI:1917048]
ENSMUSG00000045136	-1.12263	7.78455	22.8805	1.72391e-06	0.000375238	chr13	-	34130354	34127008	NM_023716	Tubb2b	tubulin, beta 2B class IIB [Source:MGI Symbol;Acc:MGI:1920960]
ENSMUSG00000079363	-1.12315	4.17785	9.36495	0.00221174	0.0397696	chr5	-	105139586	105115767	NM_001256005	Gbp4	guanylate binding protein 4 [Source:MGI Symbol;Acc:MGI:97072]
ENSMUSG00000070576	-1.12555	4.12363	6.86377	0.00879609	0.0806048	chr5	+	111417442	111457033	NM_001081235	Mn1	meningioma 1 [Source:MGI Symbol;Acc:MGI:1261813]
ENSMUSG00000032135	-1.12848	3.79736	12.4382	0.000420634	0.0151347	chr9	+	44134562	44142727	NM_023061	Mcam	melanoma cell adhesion molecule [Source:MGI Symbol;Acc:MGI:1933966]
ENSMUSG00000023411	-1.13149	1.23296	6.22249	0.0126138	0.0955375	chr14	+	55824795	55833943	NM_001168346	Nfatc4	nuclear factor of activated T cells, cytoplasmic, calcineurin dependent 4 [Source:MGI Symbol;Acc:MGI:1920431]
ENSMUSG00000024339	-1.13173	3.56754	18.526	1.67605e-05	0.0017568	chr17	+	34203527	34216321	NM_011530	Tap2	transporter 2, ATP-binding cassette, sub-family B (MDR/TAP) [Source:MGI Symbol;Acc:MGI:98484]
ENSMUSG00000026253	-1.13186	8.97233	21.6698	3.23852e-06	0.000589048	chr1	+	87205811	87212694	NM_009604	Chrng	cholinergic receptor, nicotinic, gamma polypeptide [Source:MGI Symbol;Acc:MGI:87895]
ENSMUSG00000050035	-1.13323	0.931761	7.28716	0.00694492	0.0719879	chr10	-	85102495	85097019	NM_010214	Fhl4	four and a half LIM domains 4 [Source:MGI Symbol;Acc:MGI:1338765]
ENSMUSG00000050270	-1.13757	0.908429	6.92138	0.00851713	0.0792071	chr11	+	67025154	67034790	NM_177392	Tmem220	transmembrane protein 220 [Source:MGI Symbol;Acc:MGI:2443691]
ENSMUSG00000025429	-1.14003	3.07408	9.44601	0.00211609	0.038507	chr18	+	77794545	77882007	NM_013831	Pstpip2	proline-serine-threonine phosphatase-interacting protein 2 [Source:MGI Symbol;Acc:MGI:1335088]
ENSMUSG00000027792	-1.14067	2.90852	11.1997	0.000818094	0.0225907	chr3	-	73708415	73635808	NM_009738	Bche	butyrylcholinesterase [Source:MGI Symbol;Acc:MGI:894278]
ENSMUSG00000047986	-1.14149	3.30495	8.10438	0.00441585	0.0578692	chr8	+	84021471	84030295	NM_028877	Palm3	paralemmin 3 [Source:MGI Symbol;Acc:MGI:1921587]
ENSMUSG00000005413	-1.14389	6.63493	11.9762	0.000538849	0.0176352	chr8	+	75093591	75100596	NM_010442	Hmox1	heme oxygenase 1 [Source:MGI Symbol;Acc:MGI:96163]
ENSMUSG00000086392	-1.14398	1.30478	8.22271	0.00413693	0.0561162	chr3	+	35999913	36008828	NR_029456	Mccc1os	methylcrotonoyl-Coenzyme A carboxylase 1 (alpha), opposite strand [Source:MGI Symbol;Acc:MGI:3590669]
ENSMUSG00000021983	-1.14421	0.959464	9.66125	0.00188196	0.0367157	chr14	-	60086834	59647531	NM_015803	Atp8a2	ATPase, aminophospholipid transporter-like, class I, type 8A, member 2 [Source:MGI Symbol;Acc:MGI:1354710]
ENSMUSG00000017002	-1.14423	1.30487	8.48836	0.00357426	0.051716	chr2	-	164356507	164354070	NM_011414	Slpi	secretory leukocyte peptidase inhibitor [Source:MGI Symbol;Acc:MGI:109297]
ENSMUSG00000006611	-1.15645	0.830312	6.69697	0.00965771	0.084581	chr13	-	23710854	23703840	NM_010424	Hfe	hemochromatosis [Source:MGI Symbol;Acc:MGI:109191]
ENSMUSG00000078815	-1.15717	6.05577	13.6359	0.000221896	0.0100185	chr7	+	3424195	3435667	NM_133183	Cacng6	calcium channel, voltage-dependent, gamma subunit 6 [Source:MGI Symbol;Acc:MGI:1859168]
ENSMUSG00000040372	-1.16273	3.58844	15.5008	8.24723e-05	0.00512696	chr4	+	24973419	25009233	NM_030733	Gpr63	G protein-coupled receptor 63 [Source:MGI Symbol;Acc:MGI:2135884]
ENSMUSG00000026459	-1.16355	10.6666	14.6513	0.000129348	0.00717515	chr1	+	134289989	134292548	NM_031189	Myog	myogenin [Source:MGI Symbol;Acc:MGI:97276]
ENSMUSG00000029484	-1.1678	6.85568	13.4366	0.000246762	0.0109025	chr5	+	96793385	96845966	NM_013470	Anxa3	annexin A3 [Source:MGI Symbol;Acc:MGI:1201378]
ENSMUSG00000018339	-1.1717	6.06291	13.7726	0.000206325	0.0095597	chr11	+	54902772	54910377	NM_008161	Gpx3	glutathione peroxidase 3 [Source:MGI Symbol;Acc:MGI:105102]
ENSMUSG00000026712	-1.17311	1.63168	10.0003	0.00156511	0.0322939	chr2	+	14229392	14332057	NM_008625	Mrc1	mannose receptor, C type 1 [Source:MGI Symbol;Acc:MGI:97142]
ENSMUSG00000034533	-1.17443	2.11952	9.75913	0.00178434	0.0351498	chr9	-	119719032	119608456	NM_001205321	Scn10a	sodium channel, voltage-gated, type X, alpha [Source:MGI Symbol;Acc:MGI:108029]
ENSMUSG00000037318	-1.17651	4.23227	7.01427	0.00808627	0.0775127	chr1	-	193201547	193175504	NM_153137	Traf3ip3	TRAF3 interacting protein 3 [Source:MGI Symbol;Acc:MGI:2441706]
ENSMUSG00000052852	-1.18713	7.56289	17.8643	2.37229e-05	0.00214216	chr6	+	71707561	71810710	NM_178608	Reep1	receptor accessory protein 1 [Source:MGI Symbol;Acc:MGI:1098827]
ENSMUSG00000002007	-1.1876	6.14689	17.0435	3.65334e-05	0.00284201	chrX	+	73774405	73778925	NM_019684	Srpk3	serine/arginine-rich protein specific kinase 3 [Source:MGI Symbol;Acc:MGI:1891338]
ENSMUSG00000045659	-1.19213	4.27092	11.5399	0.00068119	0.0200942	chr7	-	116237776	116123493	NM_001305186	Plekha7	pleckstrin homology domain containing, family A member 7 [Source:MGI Symbol;Acc:MGI:2445094]
ENSMUSG00000027737	-1.19446	4.48675	7.04719	0.00793896	0.0769847	chr3	-	50443611	50364938	NM_011990	Slc7a11	solute carrier family 7 (cationic amino acid transporter, y+ system), member 11 [Source:MGI Symbol;Acc:MGI:1347355]
ENSMUSG00000035048	-1.1983	4.50711	19.425	1.04631e-05	0.00130746	chr9	+	102626296	102634425	NM_181394	Anapc13	anaphase promoting complex subunit 13 [Source:MGI Symbol;Acc:MGI:1916260]
ENSMUSG00000018845	-1.20784	7.30518	17.8175	2.43136e-05	0.00217959	chr11	+	82911253	82943403	NM_178680	Unc45b	unc-45 homolog B (C. elegans) [Source:MGI Symbol;Acc:MGI:2443377]
ENSMUSG00000032679	-1.20829	2.00564	7.70922	0.00549394	0.064058	chr2	+	104095801	104115354	NM_007652	Cd59a	CD59a antigen [Source:MGI Symbol;Acc:MGI:109177]
ENSMUSG00000068614	-1.20997	11.6698	12.5671	0.000392599	0.014498	chr2	-	114052887	114047282	NM_009608	Actc1	actin, alpha, cardiac muscle 1 [Source:MGI Symbol;Acc:MGI:87905]
ENSMUSG00000061461	-1.2116	5.36656	19.16	1.20206e-05	0.00141626	chr5	+	53267106	53278539	NM_001145433	Smim20	small integral membrane protein 20 [Source:MGI Symbol;Acc:MGI:1913528]
ENSMUSG00000057058	-1.21277	0.761033	6.79604	0.00913602	0.0823773	chr11	+	96464593	96758941	NM_001033186	Skap1	src family associated phosphoprotein 1 [Source:MGI Symbol;Acc:MGI:1925723]
ENSMUSG00000048120	-1.21325	1.76852	8.86527	0.00290647	0.0467572	chr19	+	40659770	40741602	NM_001304721	Entpd1	ectonucleoside triphosphate diphosphohydrolase 1 [Source:MGI Symbol;Acc:MGI:102805]
ENSMUSG00000032388	-1.21852	6.9947	17.07	3.60263e-05	0.00284182	chr9	+	65460937	65488470	NM_138584	Spg21	spastic paraplegia 21 homolog (human) [Source:MGI Symbol;Acc:MGI:106403]
ENSMUSG00000034245	-1.22517	4.85624	20.9564	4.69867e-06	0.000735787	chr6	+	91156665	91174692	NM_144919	Hdac11	histone deacetylase 11 [Source:MGI Symbol;Acc:MGI:2385252]
ENSMUSG00000058914	-1.23203	8.19439	9.46606	0.00209309	0.0384046	chr15	+	10952332	10980150	NM_030888	C1qtnf3	C1q and tumor necrosis factor related protein 3 [Source:MGI Symbol;Acc:MGI:1932136]
ENSMUSG00000016756	-1.2333	4.09828	13.0779	0.000298795	0.0126329	chr13	+	24415123	24477285	NM_007717	Cmah	cytidine monophospho-N-acetylneuraminic acid hydroxylase [Source:MGI Symbol;Acc:MGI:103227]
ENSMUSG00000025069	-1.23383	1.92163	13.1898	0.00028148	0.0120909	chr19	+	47865767	47886324	NM_026619	Gsto2	glutathione S-transferase omega 2 [Source:MGI Symbol;Acc:MGI:1915464]
ENSMUSG00000050777	-1.23705	5.13715	11.6431	0.000644409	0.0194439	chr1	-	120074074	120067377	NM_019432	Tmem37	transmembrane protein 37 [Source:MGI Symbol;Acc:MGI:2157899]
ENSMUSG00000062760	-1.24667	5.62032	11.811	0.000588824	0.0182399	chr15	-	84447097	84379203	NM_001163145	1810041L15Rik	RIKEN cDNA 1810041L15 gene [Source:MGI Symbol;Acc:MGI:1919551]
ENSMUSG00000025488	-1.25178	4.99488	7.31188	0.00685001	0.0716327	chr7	-	140900446	140898943	NM_007751	Cox8b	cytochrome c oxidase subunit VIIIb [Source:MGI Symbol;Acc:MGI:105958]
ENSMUSG00000029059	-1.25181	4.31287	8.18587	0.0042218	0.0567695	chr4	-	154899110	154896399	NM_025582	Fam213b	family with sequence similarity 213, member B [Source:MGI Symbol;Acc:MGI:1913719]
ENSMUSG00000034795	-1.25393	2.73891	17.9505	2.26722e-05	0.00207761	chr14	+	77036772	77112204	NM_175369	Ccdc122	coiled-coil domain containing 122 [Source:MGI Symbol;Acc:MGI:1918358]
ENSMUSG00000013584	-1.25743	0.301818	8.02762	0.00460692	0.058933	chr9	+	71215789	71296243	NM_009022	Aldh1a2	aldehyde dehydrogenase family 1, subfamily A2 [Source:MGI Symbol;Acc:MGI:107928]
ENSMUSG00000038550	-1.26119	1.96873	9.00628	0.00269053	0.0450398	chr3	-	95882231	95878505	NM_001033302	Ciart	circadian associated repressor of transcription [Source:MGI Symbol;Acc:MGI:2684975]
ENSMUSG00000029096	-1.26294	3.45398	10.3921	0.00126557	0.02857	chr5	-	35679782	35652023	NM_030127	Htra3	HtrA serine peptidase 3 [Source:MGI Symbol;Acc:MGI:1925808]
ENSMUSG00000087203	-1.26407	0.9594	10.22	0.00138927	0.0305185	chr2	-	118111202	117857291	NR_126479	Gm13986	predicted gene 13986 [Source:MGI Symbol;Acc:MGI:3651937]
ENSMUSG00000032246	-1.26492	1.78293	7.7157	0.00547427	0.0640096	chr9	+	62858104	62875918	NM_138304	Calml4	calmodulin-like 4 [Source:MGI Symbol;Acc:MGI:1922850]
ENSMUSG00000054003	-1.27359	0.219636	6.12987	0.0132916	0.0983437	chr12	+	111971559	112068854	NM_029056	Tdrd9	tudor domain containing 9 [Source:MGI Symbol;Acc:MGI:1921941]
ENSMUSG00000091243	-1.27697	6.96367	16.2169	5.64876e-05	0.00397131	chr16	+	65815633	65863057	NM_028572	Vgll3	vestigial like 3 (Drosophila) [Source:MGI Symbol;Acc:MGI:1920819]
ENSMUSG00000056055	-1.27785	0.418671	8.94696	0.00277932	0.0456007	chr1	+	87803680	87845158	NM_009118	Sag	S-antigen, retina and pineal gland (arrestin) [Source:MGI Symbol;Acc:MGI:98227]
ENSMUSG00000036570	-1.27862	3.80687	6.91031	0.00857002	0.0794077	chr7	-	31055656	31051681	NM_052992	Fxyd1	FXYD domain-containing ion transport regulator 1 [Source:MGI Symbol;Acc:MGI:1889273]
ENSMUSG00000038623	-1.28983	6.91834	12.9128	0.000326348	0.0131507	chr7	+	81859001	81884071	NM_145375	Tm6sf1	transmembrane 6 superfamily member 1 [Source:MGI Symbol;Acc:MGI:1933209]
ENSMUSG00000001864	-1.29038	8.4438	21.7834	3.0523e-06	0.000572121	chr2	+	31950139	31973442	NM_145144	Aif1l	allograft inflammatory factor 1-like [Source:MGI Symbol;Acc:MGI:1919598]
ENSMUSG00000026072	-1.29098	6.42038	12.2747	0.000459128	0.0157368	chr1	+	40225080	40317257	NM_008362	Il1r1	interleukin 1 receptor, type I [Source:MGI Symbol;Acc:MGI:96545]
ENSMUSG00000046814	-1.29664	3.33744	12.4211	0.00042452	0.0151347	chr2	+	119167773	119172390	NM_177157	Gchfr	GTP cyclohydrolase I feedback regulator [Source:MGI Symbol;Acc:MGI:2443977]
ENSMUSG00000055313	-1.29858	0.17666	9.15017	0.00248695	0.0427901	chr13	-	21441044	21421852	NM_001162920	Pgbd1	piggyBac transposable element derived 1 [Source:MGI Symbol;Acc:MGI:2441675]
ENSMUSG00000056271	-1.30476	4.18315	19.188	1.18453e-05	0.00140902	chr9	-	57620774	57607085	NM_199222	Lman1l	lectin, mannose-binding 1 like [Source:MGI Symbol;Acc:MGI:2667537]
ENSMUSG00000027890	-1.3056	2.42887	22.4153	2.19619e-06	0.000443309	chr3	-	108044894	108040408	NM_026764	Gstm4	glutathione S-transferase, mu 4 [Source:MGI Symbol;Acc:MGI:95862]
ENSMUSG00000021203	-1.31042	4.92417	18.2518	1.93539e-05	0.00188526	chr12	+	103388682	103406339	NM_001177841	Otub2	OTU domain, ubiquitin aldehyde binding 2 [Source:MGI Symbol;Acc:MGI:1915399]
ENSMUSG00000026610	-1.31081	3.58628	7.91332	0.00490723	0.0604654	chr1	+	187609029	188214386	NM_001243792	Esrrg	estrogen-related receptor gamma [Source:MGI Symbol;Acc:MGI:1347056]
ENSMUSG00000078234	-1.31781	2.48184	7.59046	0.00586778	0.0662321	chr4	-	139968026	139960220	NM_173427	Klhdc7a	kelch domain containing 7A [Source:MGI Symbol;Acc:MGI:2444612]
ENSMUSG00000027199	-1.32189	7.60868	19.1898	1.18347e-05	0.00140902	chr2	-	122611303	122594467	NM_025961	Gatm	glycine amidinotransferase (L-arginine:glycine amidinotransferase) [Source:MGI Symbol;Acc:MGI:1914342]
ENSMUSG00000031770	-1.3287	7.38776	26.2137	3.05649e-07	0.000114581	chr8	+	94386438	94395377	NM_022331	Herpud1	homocysteine-inducible, endoplasmic reticulum stress-inducible, ubiquitin-like domain member 1 [Source:MGI Symbol;Acc:MGI:1927406]
ENSMUSG00000001642	-1.32937	8.44541	24.7436	6.54866e-07	0.000197594	chr6	-	34317478	34303934	NM_009658	Akr1b3	aldo-keto reductase family 1, member B3 (aldose reductase) [Source:MGI Symbol;Acc:MGI:1353494]
ENSMUSG00000004460	-1.3314	7.53303	24.9114	6.00273e-07	0.000185649	chr16	+	22857845	22872388	NM_001190804	Dnajb11	DnaJ (Hsp40) homolog, subfamily B, member 11 [Source:MGI Symbol;Acc:MGI:1915088]
ENSMUSG00000049565	-1.33555	2.94244	18.7568	1.48489e-05	0.00161137	chr3	+	108739658	108782309	NM_177859	Aknad1	AKNA domain containing 1 [Source:MGI Symbol;Acc:MGI:3584453]
ENSMUSG00000056888	-1.33755	1.98582	8.98999	0.00271463	0.0450774	chr10	-	111997264	111985448	NM_028608	Glipr1	GLI pathogenesis-related 1 (glioma) [Source:MGI Symbol;Acc:MGI:1920940]
ENSMUSG00000038539	-1.33779	6.63447	17.5976	2.72937e-05	0.00234479	chr7	-	44815658	44812257	NM_030693	Atf5	activating transcription factor 5 [Source:MGI Symbol;Acc:MGI:2141857]
ENSMUSG00000028167	-1.33826	0.926415	10.1079	0.00147633	0.0311666	chr3	+	135281221	135304426	NM_001172055	Bdh2	3-hydroxybutyrate dehydrogenase, type 2 [Source:MGI Symbol;Acc:MGI:1917022]
ENSMUSG00000022769	-1.33908	4.88239	18.2917	1.8953e-05	0.00186086	chr16	-	17132383	17130138	NM_022324	Sdf2l1	stromal cell-derived factor 2-like 1 [Source:MGI Symbol;Acc:MGI:2149842]
ENSMUSG00000079523	-1.33914	10.5542	18.0113	2.19598e-05	0.0020426	chr6	-	72958488	72957347	NM_025284	Tmsb10	thymosin, beta 10 [Source:MGI Symbol;Acc:MGI:109146]
ENSMUSG00000009214	-1.34025	8.95929	15.3622	8.87449e-05	0.00543497	chr2	-	27072179	27061636	NM_025376	Tmem8c	transmembrane protein 8C [Source:MGI Symbol;Acc:MGI:1913389]
ENSMUSG00000028125	-1.34226	1.90066	12.4973	0.000407533	0.0148719	chr3	+	122044443	122180059	NM_007378	Abca4	ATP-binding cassette, sub-family A (ABC1), member 4 [Source:MGI Symbol;Acc:MGI:109424]
ENSMUSG00000004929	-1.34762	7.94055	21.6405	3.28842e-06	0.000589048	chr10	+	81070035	81082559	NM_022653	Thop1	thimet oligopeptidase 1 [Source:MGI Symbol;Acc:MGI:1354165]
ENSMUSG00000038742	-1.34959	1.62581	6.61348	0.010121	0.0864091	chr9	-	20879727	20873809	NM_145154	Angptl6	angiopoietin-like 6 [Source:MGI Symbol;Acc:MGI:1917976]
ENSMUSG00000054426	-1.35255	1.68374	7.97628	0.00473943	0.0596455	chr3	-	115888094	115881581	NR_027894	A930005H10Rik	RIKEN cDNA A930005H10 gene [Source:MGI Symbol;Acc:MGI:1915411]
ENSMUSG00000060002	-1.35354	6.21958	22.7554	1.83987e-06	0.00038578	chr10	-	88503970	88472817	NM_144807	Chpt1	choline phosphotransferase 1 [Source:MGI Symbol;Acc:MGI:2384841]
ENSMUSG00000028542	-1.35398	4.3479	12.1845	0.000481884	0.0162879	chr4	+	117835051	117869305	NM_008135	Slc6a9	solute carrier family 6 (neurotransmitter transporter, glycine), member 9 [Source:MGI Symbol;Acc:MGI:95760]
ENSMUSG00000061859	-1.36197	7.92473	21.3299	3.86647e-06	0.000655235	chr4	+	98546734	98719603	NM_007704	Inadl	InaD-like (Drosophila) [Source:MGI Symbol;Acc:MGI:1277960]
ENSMUSG00000001053	-1.36243	5.22085	21.1653	4.21325e-06	0.00069563	chr11	-	51650842	51643063	NM_145974	N4bp3	NEDD4 binding protein 3 [Source:MGI Symbol;Acc:MGI:2442218]
ENSMUSG00000037411	-1.36691	6.22032	7.30749	0.00686678	0.0716476	chr5	-	137072259	137061504	NM_008871	Serpine1	serine (or cysteine) peptidase inhibitor, clade E, member 1 [Source:MGI Symbol;Acc:MGI:97608]
ENSMUSG00000027456	-1.37138	0.291783	6.88533	0.0086906	0.0800006	chr2	+	151572622	151590005	NM_145535	Sdcbp2	syndecan binding protein (syntenin) 2 [Source:MGI Symbol;Acc:MGI:2385156]
ENSMUSG00000030739	-1.37156	0.871297	6.20589	0.0127326	0.0957042	chr7	-	44665501	44605803	NM_028021	Myh14	myosin, heavy polypeptide 14 [Source:MGI Symbol;Acc:MGI:1919210]
ENSMUSG00000030717	-1.37467	4.25617	9.95393	0.00160507	0.0328061	chr7	-	126625676	126623249	NM_019738	Nupr1	nuclear protein transcription regulator 1 [Source:MGI Symbol;Acc:MGI:1891834]
ENSMUSG00000029452	-1.37525	2.40488	14.6714	0.000127974	0.00713139	chr5	+	121463152	121495394	NM_001161627	Tmem116	transmembrane protein 116 [Source:MGI Symbol;Acc:MGI:1924712]
ENSMUSG00000038754	-1.38009	0.270738	7.96413	0.00477134	0.0598032	chr19	+	46131897	46135307	NM_007703	Elovl3	elongation of very long chain fatty acids (FEN1/Elo2, SUR4/Elo3, yeast)-like 3 [Source:MGI Symbol;Acc:MGI:1195976]
ENSMUSG00000013415	-1.38338	1.59379	9.47478	0.00208316	0.0384046	chr11	-	96005940	95957163	NM_009951	Igf2bp1	insulin-like growth factor 2 mRNA binding protein 1 [Source:MGI Symbol;Acc:MGI:1890357]
ENSMUSG00000040435	-1.38404	5.98063	12.2058	0.0004764	0.016206	chr7	-	45526268	45522917	NM_008654	Ppp1r15a	protein phosphatase 1, regulatory (inhibitor) subunit 15A [Source:MGI Symbol;Acc:MGI:1927072]
ENSMUSG00000047963	-1.38453	6.88038	12.0809	0.000509397	0.0169859	chr5	+	92603051	92606579	NM_175096	Stbd1	starch binding domain 1 [Source:MGI Symbol;Acc:MGI:1261768]
ENSMUSG00000047810	-1.38569	0.600678	7.76809	0.00531772	0.0630734	chr19	-	6858211	6844623	NM_001081291	Ccdc88b	coiled-coil domain containing 88B [Source:MGI Symbol;Acc:MGI:1925567]
ENSMUSG00000044017	-1.38756	0.04106	6.4794	0.0109132	0.0893677	chr5	+	129096750	129204599	NM_001081342	Adgrd1	adhesion G protein-coupled receptor D1 [Source:MGI Symbol;Acc:MGI:3041203]
ENSMUSG00000030284	-1.38833	6.5813	28.1446	1.1258e-07	5.80304e-05	chr6	+	113483297	113493338	NM_133930	Creld1	cysteine-rich with EGF-like domains 1 [Source:MGI Symbol;Acc:MGI:2152539]
ENSMUSG00000051029	-1.39427	0.793574	7.48331	0.00622735	0.0683063	chr13	+	33084125	33094380	NM_173052	Serpinb1b	serine (or cysteine) peptidase inhibitor, clade B, member 1b [Source:MGI Symbol;Acc:MGI:2445361]
ENSMUSG00000039865	-1.39455	-0.00368634	6.41033	0.0113458	0.0914641	chr3	-	121532404	121459528	NM_145394	Slc44a3	solute carrier family 44, member 3 [Source:MGI Symbol;Acc:MGI:2384860]
ENSMUSG00000024664	-1.39825	8.59491	27.3279	1.71718e-07	7.37358e-05	chr19	+	10041548	10059671	NM_021890	Fads3	fatty acid desaturase 3 [Source:MGI Symbol;Acc:MGI:1928740]
ENSMUSG00000038517	-1.40564	0.678068	10.2015	0.00140324	0.0306163	chr11	-	97149712	97136173	NM_198100	Tbkbp1	TBK1 binding protein 1 [Source:MGI Symbol;Acc:MGI:1920424]
ENSMUSG00000036067	-1.40715	3.98511	13.8476	0.000198245	0.00943265	chr2	-	27027909	27021363	NM_001177627	Slc2a6	solute carrier family 2 (facilitated glucose transporter), member 6 [Source:MGI Symbol;Acc:MGI:2443286]
ENSMUSG00000033044	-1.41071	5.7417	14.1928	0.000164999	0.0085406	chr11	+	67798271	67815999	NM_001013013	Dhrs7c	dehydrogenase/reductase (SDR family) member 7C [Source:MGI Symbol;Acc:MGI:1915710]
ENSMUSG00000025140	-1.41596	4.26236	19.0319	1.28553e-05	0.00148628	chr11	-	120643670	120635712	NM_144795	Pycr1	pyrroline-5-carboxylate reductase 1 [Source:MGI Symbol;Acc:MGI:2384795]
ENSMUSG00000029752	-1.41681	8.37024	27.3152	1.72851e-07	7.37358e-05	chr6	-	7693254	7675169	NM_012055	Asns	asparagine synthetase [Source:MGI Symbol;Acc:MGI:1350929]
ENSMUSG00000101746	-1.41796	2.62772	12.8041	0.000345862	0.0136506	chr1	-	177642943	177641542	NR_037994	2310043L19Rik	RIKEN cDNA 2310043L19 gene [Source:MGI Symbol;Acc:MGI:1922839]
ENSMUSG00000033644	-1.42307	0.485624	6.26119	0.0123411	0.0949278	chr14	-	70429094	70372480	NM_021308	Piwil2	piwi-like RNA-mediated gene silencing 2 [Source:MGI Symbol;Acc:MGI:1930036]
ENSMUSG00000023883	-1.43608	6.93105	20.4747	6.04261e-06	0.000869222	chr17	-	14961273	14945009	NM_024250	Phf10	PHD finger protein 10 [Source:MGI Symbol;Acc:MGI:1919307]
ENSMUSG00000020620	-1.43693	3.4458	10.2131	0.00139444	0.0305185	chr11	-	109995845	109932190	NM_013851	Abca8b	ATP-binding cassette, sub-family A (ABC1), member 8b [Source:MGI Symbol;Acc:MGI:1351668]
ENSMUSG00000005667	-1.44086	7.28244	30.4537	3.41934e-08	2.22635e-05	chr6	-	83317606	83305691	NM_008638	Mthfd2	methylenetetrahydrofolate dehydrogenase (NAD+ dependent), methenyltetrahydrofolate cyclohydrolase [Source:MGI Symbol;Acc:MGI:1338850]
ENSMUSG00000072966	-1.44484	1.31202	6.20413	0.0127453	0.0957142	chrX	+	135839056	135844726	NM_001163017	Gprasp2	G protein-coupled receptor associated sorting protein 2 [Source:MGI Symbol;Acc:MGI:2442071]
ENSMUSG00000058672	-1.44511	8.05301	23.3576	1.34513e-06	0.000313974	chr13	-	34078008	34074301	NM_009450	Tubb2a	tubulin, beta 2A class IIA [Source:MGI Symbol;Acc:MGI:107861]
ENSMUSG00000010095	-1.44598	7.53056	22.3931	2.22174e-06	0.000443309	chr19	-	8723369	8706882	NM_001161413	Slc3a2	solute carrier family 3 (activators of dibasic and neutral amino acid transport), member 2 [Source:MGI Symbol;Acc:MGI:96955]
ENSMUSG00000030108	-1.44638	-0.0465462	9.35795	0.0022202	0.0398059	chr6	+	121300227	121337733	NM_144512	Slc6a13	solute carrier family 6 (neurotransmitter transporter, GABA), member 13 [Source:MGI Symbol;Acc:MGI:95629]
ENSMUSG00000029381	-1.45714	5.98827	10.3744	0.00127773	0.0287396	chr5	+	92683435	92965314	NM_015756	Shroom3	shroom family member 3 [Source:MGI Symbol;Acc:MGI:1351655]
ENSMUSG00000037206	-1.46451	2.4867	8.86167	0.00291221	0.0467572	chr9	-	58159221	58156265	NM_012043	Islr	immunoglobulin superfamily containing leucine-rich repeat [Source:MGI Symbol;Acc:MGI:1349645]
ENSMUSG00000002012	-1.47471	0.473372	11.3017	0.000774365	0.021772	chrX	-	73659828	73655994	NM_001199351	Pnck	pregnancy upregulated non-ubiquitously expressed CaM kinase [Source:MGI Symbol;Acc:MGI:1347357]
ENSMUSG00000022487	-1.48948	-0.0689261	7.5222	0.00609433	0.0678553	chr15	-	103430470	103402405	NM_028797	Gtsf1	gametocyte specific factor 1 [Source:MGI Symbol;Acc:MGI:1921424]
ENSMUSG00000028597	-1.4895	3.48182	20.7631	5.19759e-06	0.00079382	chr4	-	108406961	108400390	NM_024198	Gpx7	glutathione peroxidase 7 [Source:MGI Symbol;Acc:MGI:1914555]
ENSMUSG00000017969	-1.49316	5.89919	11.5019	0.000695245	0.020333	chr2	-	167240604	167202907	NM_008968	Ptgis	prostaglandin I2 (prostacyclin) synthase [Source:MGI Symbol;Acc:MGI:1097156]
ENSMUSG00000028158	-1.49434	5.34155	20.4893	5.99644e-06	0.000869222	chr3	-	138131377	138089854	NM_008642	Mttp	microsomal triglyceride transfer protein [Source:MGI Symbol;Acc:MGI:106926]
ENSMUSG00000031022	-1.49741	4.10826	10.6914	0.00107634	0.0258552	chr7	-	109723786	109712181	NM_001040700	BC051019	cDNA sequence BC051019 [Source:MGI Symbol;Acc:MGI:1928824]
ENSMUSG00000027313	-1.52088	4.95709	9.4311	0.00213336	0.0386976	chr2	+	119351229	119354381	NM_026929	Chac1	ChaC, cation transport regulator 1 [Source:MGI Symbol;Acc:MGI:1916315]
ENSMUSG00000028369	-1.52845	0.556345	7.13996	0.00753849	0.075148	chr4	-	58206596	58042442	NM_022814	Svep1	sushi, von Willebrand factor type A, EGF and pentraxin domain containing 1 [Source:MGI Symbol;Acc:MGI:1928849]
ENSMUSG00000026532	-1.53706	4.81244	17.0921	3.56099e-05	0.00284182	chr1	+	174172776	174248450	NM_011465	Spta1	spectrin alpha, erythrocytic 1 [Source:MGI Symbol;Acc:MGI:98385]
ENSMUSG00000031298	-1.5393	0.768096	11.4139	0.000728972	0.0208753	chrX	+	160390725	160498070	NM_178712	Adgrg2	adhesion G protein-coupled receptor G2 [Source:MGI Symbol;Acc:MGI:2446854]
ENSMUSG00000040147	-1.54063	0.675613	10.5258	0.00117719	0.0271192	chrX	-	16817366	16709282	NM_172778	Maob	monoamine oxidase B [Source:MGI Symbol;Acc:MGI:96916]
ENSMUSG00000048373	-1.54464	5.86702	18.852	1.41264e-05	0.00156033	chr5	-	43981779	43978858	NM_001271616	Fgfbp1	fibroblast growth factor binding protein 1 [Source:MGI Symbol;Acc:MGI:1096350]
ENSMUSG00000004748	-1.55058	1.88876	12.4242	0.0004238	0.0151347	chr11	-	4095445	4091480	NM_026443	Mtfp1	mitochondrial fission process 1 [Source:MGI Symbol;Acc:MGI:1916686]
ENSMUSG00000092167	-1.56193	0.233659	11.6298	0.000649049	0.0194888	chr14	-	7100621	7083208	NM_001024712	Gm3696	predicted gene 3696 [Source:MGI Symbol;Acc:MGI:3781872]
ENSMUSG00000029204	-1.56299	1.64794	7.16136	0.00744906	0.0745569	chr5	+	65863007	65893443	NM_001081105	Rhoh	ras homolog gene family, member H [Source:MGI Symbol;Acc:MGI:1921984]
ENSMUSG00000057948	-1.56552	3.71539	17.7405	2.53173e-05	0.00222128	chr11	-	116077961	116062096	NM_001009573	Unc13d	unc-13 homolog D (C. elegans) [Source:MGI Symbol;Acc:MGI:1917700]
ENSMUSG00000040569	-1.57114	2.24268	10.9153	0.000953714	0.0245289	chr4	-	14621805	14502430	NM_145947	Slc26a7	solute carrier family 26, member 7 [Source:MGI Symbol;Acc:MGI:2384791]
ENSMUSG00000024640	-1.57235	8.81155	29.9758	4.37466e-08	2.70594e-05	chr19	-	15925059	15904678	NM_177420	Psat1	phosphoserine aminotransferase 1 [Source:MGI Symbol;Acc:MGI:2183441]
ENSMUSG00000039851	-1.57293	-0.00507138	8.91101	0.00283456	0.0460188	chr16	-	91069145	91053935	NM_028905	4932438H23Rik	RIKEN cDNA 4932438H23 gene [Source:MGI Symbol;Acc:MGI:1921637]
ENSMUSG00000030786	-1.57496	0.850807	9.58938	0.00195706	0.0375361	chr7	+	128062640	128118490	NM_008401	Itgam	integrin alpha M [Source:MGI Symbol;Acc:MGI:96607]
ENSMUSG00000004098	-1.57956	3.70228	12.3799	0.000433989	0.0152801	chr9	-	20815067	20770050	NM_016919	Col5a3	collagen, type V, alpha 3 [Source:MGI Symbol;Acc:MGI:1858212]
ENSMUSG00000044562	-1.58435	0.873322	9.22406	0.00238855	0.0417355	chr7	+	45627488	45639093	NM_028544	Rasip1	Ras interacting protein 1 [Source:MGI Symbol;Acc:MGI:1917153]
ENSMUSG00000023047	-1.58486	-0.0787436	9.76559	0.00177808	0.0350991	chr15	+	102445367	102454630	NM_144547	Amhr2	anti-Mullerian hormone type 2 receptor [Source:MGI Symbol;Acc:MGI:105062]
ENSMUSG00000043259	-1.59888	3.21558	13.9995	0.000182861	0.00904871	chr10	+	70440880	70558729	NM_001143776	Fam13c	family with sequence similarity 13, member C [Source:MGI Symbol;Acc:MGI:1918971]
ENSMUSG00000040010	-1.60367	8.44735	24.3034	8.22955e-07	0.000231381	chr8	-	121907694	121881150	NM_011404	Slc7a5	solute carrier family 7 (cationic amino acid transporter, y+ system), member 5 [Source:MGI Symbol;Acc:MGI:1298205]
ENSMUSG00000031098	-1.61495	1.30025	16.3797	5.18375e-05	0.00372838	chr7	+	142434977	142440396	NM_018802	Syt8	synaptotagmin VIII [Source:MGI Symbol;Acc:MGI:1859867]
ENSMUSG00000006154	-1.6281	0.612392	6.70007	0.00964089	0.084581	chr7	+	4464742	4479242	NM_026146	Eps8l1	EPS8-like 1 [Source:MGI Symbol;Acc:MGI:1914675]
ENSMUSG00000078350	-1.62943	2.84128	19.3395	1.09422e-05	0.00134702	chr4	-	154026230	154021456	NM_001163721	Smim1	small integral membrane protein 1 [Source:MGI Symbol;Acc:MGI:1916109]
ENSMUSG00000061576	-1.63346	5.25195	21.1635	4.2173e-06	0.00069563	chr5	+	26817357	27726460	NM_010075	Dpp6	dipeptidylpeptidase 6 [Source:MGI Symbol;Acc:MGI:94921]
ENSMUSG00000030785	-1.63392	5.81762	9.42047	0.00214576	0.0388088	chr7	-	128206366	128205436	NM_009943	Cox6a2	cytochrome c oxidase subunit VIa polypeptide 2 [Source:MGI Symbol;Acc:MGI:104649]
ENSMUSG00000028643	-1.63773	6.95201	27.3799	1.67158e-07	7.37358e-05	chr4	+	119195306	119201298	NM_024462	Ccdc23	coiled-coil domain containing 23 [Source:MGI Symbol;Acc:MGI:1916466]
ENSMUSG00000020303	-1.64762	6.07641	20.5931	5.68018e-06	0.000846621	chr11	-	31370074	31357307	NM_011491	Stc2	stanniocalcin 2 [Source:MGI Symbol;Acc:MGI:1316731]
ENSMUSG00000024924	-1.64776	5.79575	12.6454	0.00037649	0.0142252	chr19	+	27217020	27249862	NM_001161420	Vldlr	very low density lipoprotein receptor [Source:MGI Symbol;Acc:MGI:98935]
ENSMUSG00000022040	-1.64963	1.03954	9.20657	0.00241148	0.0420175	chr14	-	66124500	66084377	NM_001271402	Ephx2	epoxide hydrolase 2, cytoplasmic [Source:MGI Symbol;Acc:MGI:99500]
ENSMUSG00000020805	-1.65301	0.221681	7.54503	0.00601759	0.0672412	chr11	-	72266602	72241994	NM_001004148	Slc13a5	solute carrier family 13 (sodium-dependent citrate transporter), member 5 [Source:MGI Symbol;Acc:MGI:3037150]
ENSMUSG00000019139	-1.66096	6.38985	22.9607	1.65346e-06	0.000375238	chr8	+	70594481	70597288	NM_023627	Isyna1	myo-inositol 1-phosphate synthase A1 [Source:MGI Symbol;Acc:MGI:1919030]
ENSMUSG00000027827	-1.66213	0.446206	12.3261	0.00044667	0.0155655	chr3	+	65109384	65378219	NM_010597	Kcnab1	potassium voltage-gated channel, shaker-related subfamily, beta member 1 [Source:MGI Symbol;Acc:MGI:109155]
ENSMUSG00000045930	-1.66512	1.80079	15.5443	8.05925e-05	0.00506349	chr12	-	58269258	58264720	NM_025809	Clec14a	C-type lectin domain family 14, member a [Source:MGI Symbol;Acc:MGI:1914114]
ENSMUSG00000097587	-1.66632	0.501526	13.6991	0.000214552	0.0097942	chr15	+	98985965	98989281	NR_045991	4930578M01Rik	RIKEN cDNA 4930578M01 gene [Source:MGI Symbol;Acc:MGI:1923201]
ENSMUSG00000039179	-1.68434	3.4686	15.6934	7.44829e-05	0.00490121	chr16	-	10395490	10357948	NM_001291001	Tekt5	tektin 5 [Source:MGI Symbol;Acc:MGI:1917676]
ENSMUSG00000028179	-1.69403	3.12222	13.7914	0.000204268	0.0095597	chr3	-	157925077	157894248	NM_145953	Cth	cystathionase (cystathionine gamma-lyase) [Source:MGI Symbol;Acc:MGI:1339968]
ENSMUSG00000001763	-1.69986	5.22642	21.0355	4.50853e-06	0.000724352	chr6	+	29694222	29718559	NM_146173	Tspan33	tetraspanin 33 [Source:MGI Symbol;Acc:MGI:1919012]
ENSMUSG00000028064	-1.70992	0.0845569	12.6515	0.000375263	0.0142252	chr3	-	88455739	88435959	NM_013658	Sema4a	sema domain, immunoglobulin domain (Ig), transmembrane domain (TM) and short cytoplasmic domain, (semaphorin) 4A [Source:MGI Symbol;Acc:MGI:107560]
ENSMUSG00000007034	-1.72017	1.71097	19.5136	9.98848e-06	0.00128716	chr17	+	34914470	34930356	NM_023557	Slc44a4	solute carrier family 44, member 4 [Source:MGI Symbol;Acc:MGI:1917379]
ENSMUSG00000001827	-1.72645	3.10574	14.1954	0.000164775	0.0085406	chr7	-	101870781	101858331	NM_008034	Folr1	folate receptor 1 (adult) [Source:MGI Symbol;Acc:MGI:95568]
ENSMUSG00000024663	-1.72731	3.79187	22.7827	1.81391e-06	0.00038578	chr19	+	10018193	10035456	NM_144538	Rab3il1	RAB3A interacting protein (rabin3)-like 1 [Source:MGI Symbol;Acc:MGI:1922010]
ENSMUSG00000051590	-1.73032	0.932649	13.2195	0.000277056	0.0119801	chr1	-	127840321	127815271	NM_011737	Map3k19	mitogen-activated protein kinase kinase kinase 19 [Source:MGI Symbol;Acc:MGI:1203481]
ENSMUSG00000053846	-1.73803	1.31155	12.3765	0.000434773	0.0152801	chr18	-	74961263	74939322	NM_010720	Lipg	lipase, endothelial [Source:MGI Symbol;Acc:MGI:1341803]
ENSMUSG00000027524	-1.73873	1.00029	11.1581	0.000836664	0.0228485	chr2	+	174760619	174784042	NM_007903	Edn3	endothelin 3 [Source:MGI Symbol;Acc:MGI:95285]
ENSMUSG00000015090	-1.7425	1.22495	7.66388	0.00563373	0.0649532	chr2	-	25469842	25466709	NM_008963	Ptgds	prostaglandin D2 synthase (brain) [Source:MGI Symbol;Acc:MGI:99261]
ENSMUSG00000078949	-1.74713	5.8053	25.098	5.44887e-07	0.000175379	chr2	+	163492318	163502612	NM_001099331	R3hdml	R3H domain containing-like [Source:MGI Symbol;Acc:MGI:3650937]
ENSMUSG00000045326	-1.74733	2.05393	18.0309	2.17349e-05	0.00203699	chr3	-	108890008	108855323	NM_177091	Fndc7	fibronectin type III domain containing 7 [Source:MGI Symbol;Acc:MGI:2443535]
ENSMUSG00000020872	-1.75	2.17288	6.81027	0.0090635	0.0822053	chr11	+	95261529	95269265	NM_053093	Tac4	tachykinin 4 [Source:MGI Symbol;Acc:MGI:1931130]
ENSMUSG00000050234	-1.76284	0.49362	12.9159	0.00032581	0.0131507	chr4	-	127314039	127311421	NM_008120	Gja4	gap junction protein, alpha 4 [Source:MGI Symbol;Acc:MGI:95715]
ENSMUSG00000003559	-1.76654	2.41934	18.8113	1.4431e-05	0.00157987	chr19	+	46707443	46741095	NM_020577	As3mt	arsenic (+3 oxidation state) methyltransferase [Source:MGI Symbol;Acc:MGI:1929882]
ENSMUSG00000015134	-1.7667	0.957863	7.45472	0.00632703	0.0687197	chr7	-	66427517	66390892	NM_053080	Aldh1a3	aldehyde dehydrogenase family 1, subfamily A3 [Source:MGI Symbol;Acc:MGI:1861722]
ENSMUSG00000020256	-1.77768	5.96832	24.6956	6.71378e-07	0.000197753	chr10	-	83534140	83487450	NM_153543	Aldh1l2	aldehyde dehydrogenase 1 family, member L2 [Source:MGI Symbol;Acc:MGI:2444680]
ENSMUSG00000020990	-1.79061	0.829324	10.6021	0.0011296	0.0264367	chr12	-	69790707	69746848	NM_183294	Cdkl1	cyclin-dependent kinase-like 1 (CDC2-related kinase) [Source:MGI Symbol;Acc:MGI:1918341]
ENSMUSG00000038508	-1.80803	3.11724	10.7397	0.0010486	0.0255863	chr8	-	70632095	70629393	NM_011819	Gdf15	growth differentiation factor 15 [Source:MGI Symbol;Acc:MGI:1346047]
ENSMUSG00000041828	-1.82925	0.346591	11.9676	0.000541327	0.0176695	chr11	-	110095937	110025636	NM_153145	Abca8a	ATP-binding cassette, sub-family A (ABC1), member 8a [Source:MGI Symbol;Acc:MGI:2386846]
ENSMUSG00000075225	-1.83457	4.03282	27.7638	1.3707e-07	6.52192e-05	chr10	-	41606595	41538849	NM_001303469	Ccdc162	coiled-coil domain containing 162 [Source:MGI Symbol;Acc:MGI:1923223]
ENSMUSG00000020689	-1.84165	2.81229	9.27501	0.00232301	0.0411718	chr11	+	104608000	104670476	NM_016780	Itgb3	integrin beta 3 [Source:MGI Symbol;Acc:MGI:96612]
ENSMUSG00000045404	-1.86456	5.35763	19.7406	8.86948e-06	0.00116728	chr12	+	99964499	100062682	NM_146037	Kcnk13	potassium channel, subfamily K, member 13 [Source:MGI Symbol;Acc:MGI:2384976]
ENSMUSG00000044350	-1.86477	4.82602	27.9931	1.21748e-07	6.0246e-05	chr14	-	77036641	77024200	NM_172488	Lacc1	laccase (multicopper oxidoreductase) domain containing 1 [Source:MGI Symbol;Acc:MGI:2445077]
ENSMUSG00000035783	-1.86665	10.0979	17.7198	2.55955e-05	0.00222987	chr19	-	34255336	34241090	NM_007392	Acta2	actin, alpha 2, smooth muscle, aorta [Source:MGI Symbol;Acc:MGI:87909]
ENSMUSG00000070287	-1.86761	0.658921	15.7717	7.14629e-05	0.00472763	chr9	-	100571090	100552188	NM_001101483	Slc35g2	solute carrier family 35, member G2 [Source:MGI Symbol;Acc:MGI:2685365]
ENSMUSG00000046844	-1.8701	1.0064	8.84444	0.00293983	0.0469273	chr8	+	114205630	114374071	NM_173016	Vat1l	vesicle amine transport protein 1 homolog-like (T. californica) [Source:MGI Symbol;Acc:MGI:2142534]
ENSMUSG00000029864	-1.88443	1.27915	19.4323	1.04229e-05	0.00130746	chr6	+	42245935	42250441	NM_029555	Gstk1	glutathione S-transferase kappa 1 [Source:MGI Symbol;Acc:MGI:1923513]
ENSMUSG00000053907	-1.88541	9.06869	12.8307	0.000340979	0.0135635	chr6	-	72439558	72432799	NM_145569	Mat2a	methionine adenosyltransferase II, alpha [Source:MGI Symbol;Acc:MGI:2443731]
ENSMUSG00000079471	-1.8856	6.70341	23.6741	1.14108e-06	0.000271467	chr17	-	45602102	45600967	NM_001177469	Gm7325	predicted gene 7325 [Source:MGI Symbol;Acc:MGI:3649059]
ENSMUSG00000079440	-1.89384	0.336954	12.1976	0.000478517	0.0162185	chr1	-	87101606	87098002	NM_001081082	Alpi	alkaline phosphatase, intestinal [Source:MGI Symbol;Acc:MGI:1924018]
ENSMUSG00000031789	-1.90734	0.241845	8.33075	0.00389796	0.0543649	chr8	-	95306585	95239045	NM_001195413	Cngb1	cyclic nucleotide gated channel beta 1 [Source:MGI Symbol;Acc:MGI:2664102]
ENSMUSG00000041592	-1.90815	1.66677	9.9146	0.00163973	0.0332543	chr11	-	114066218	113776374	NM_172800	Sdk2	sidekick homolog 2 (chicken) [Source:MGI Symbol;Acc:MGI:2443847]
ENSMUSG00000034438	-1.90839	2.45122	14.1509	0.00016872	0.00868685	chr5	-	105139540	105014153	NM_029509	Gbp8	guanylate-binding protein 8 [Source:MGI Symbol;Acc:MGI:1923324]
ENSMUSG00000030693	-1.91211	0.82585	18.1508	2.04087e-05	0.00194213	chr7	+	43781054	43785410	NM_133712	Klk10	kallikrein related-peptidase 10 [Source:MGI Symbol;Acc:MGI:1916790]
ENSMUSG00000037280	-1.93312	3.49393	9.12354	0.00252341	0.0432369	chr15	-	100729376	100691813	NM_172451	Galnt6	UDP-N-acetyl-alpha-D-galactosamine:polypeptide N-acetylgalactosaminyltransferase 6 [Source:MGI Symbol;Acc:MGI:1891640]
ENSMUSG00000009210	-1.9567	-0.055641	11.8256	0.00058422	0.0182339	chr11	+	106374826	106377096	NM_029345	2310007L24Rik	RIKEN cDNA 2310007L24 gene [Source:MGI Symbol;Acc:MGI:1922823]
ENSMUSG00000021226	-1.97678	3.68487	7.8632	0.00504509	0.0613092	chr12	+	83987861	83993873	NM_134188	Acot2	acyl-CoA thioesterase 2 [Source:MGI Symbol;Acc:MGI:2159605]
ENSMUSG00000041567	-2.01056	0.972394	6.4935	0.010827	0.0889968	chr12	-	104044443	104028769	NM_026535	Serpina12	serine (or cysteine) peptidase inhibitor, clade A (alpha-1 antiproteinase, antitrypsin), member 12 [Source:MGI Symbol;Acc:MGI:1915304]
ENSMUSG00000074676	-2.0213	2.0943	7.35562	0.00668536	0.0706273	chr2	-	152933208	152931898	NM_010226	Foxs1	forkhead box S1 [Source:MGI Symbol;Acc:MGI:95546]
ENSMUSG00000027238	-2.02377	0.692794	17.5771	2.75885e-05	0.00235378	chr2	-	121807087	121545529	NM_172673	Frmd5	FERM domain containing 5 [Source:MGI Symbol;Acc:MGI:2442557]
ENSMUSG00000020788	-2.13773	3.34214	21.6146	3.33306e-06	0.000589048	chr11	+	72961169	72993043	NM_001163337	Atp2a3	ATPase, Ca++ transporting, ubiquitous [Source:MGI Symbol;Acc:MGI:1194503]
ENSMUSG00000055301	-2.18074	0.0779007	11.2446	0.000798529	0.0221991	chr3	+	138217760	138233382	NM_009626	Adh7	alcohol dehydrogenase 7 (class IV), mu or sigma polypeptide [Source:MGI Symbol;Acc:MGI:87926]
ENSMUSG00000022053	-2.19141	-0.306916	6.17382	0.0129655	0.0967882	chr14	+	67233292	67429777	NM_010095	Ebf2	early B cell factor 2 [Source:MGI Symbol;Acc:MGI:894332]
ENSMUSG00000057751	-2.22398	4.65	10.1086	0.00147581	0.0311666	chr4	+	154170730	154275713	NM_001162977	Megf6	multiple EGF-like-domains 6 [Source:MGI Symbol;Acc:MGI:1919351]
ENSMUSG00000058728	-2.30166	2.76476	11.1358	0.000846767	0.0229681	chr11	-	114960417	114956268	NM_199225	Cd300c	CD300C antigen [Source:MGI Symbol;Acc:MGI:3032626]
ENSMUSG00000011382	-2.30635	0.526454	9.82049	0.00172578	0.0344322	chr7	-	45488805	45472956	NM_027903	Dhdh	dihydrodiol dehydrogenase (dimeric) [Source:MGI Symbol;Acc:MGI:1919005]
ENSMUSG00000030399	-2.31444	6.71173	17.7972	2.45747e-05	0.00218715	chr7	+	19411094	19421583	NM_007710	Ckm	creatine kinase, muscle [Source:MGI Symbol;Acc:MGI:88413]
ENSMUSG00000026840	-2.34225	-0.112206	14.1219	0.000171335	0.00868685	chr2	+	31887344	31946539	NM_011836	Lamc3	laminin gamma 3 [Source:MGI Symbol;Acc:MGI:1344394]
ENSMUSG00000024395	-2.3466	0.0618262	15.9766	6.41299e-05	0.00433525	chr18	+	31931507	31958619	NM_144862	Lims2	LIM and senescent cell antigen like domains 2 [Source:MGI Symbol;Acc:MGI:2385067]
ENSMUSG00000029661	-2.36348	6.07028	20.3472	6.45862e-06	0.000918386	chr6	+	4505493	4541543	NM_007743	Col1a2	collagen, type I, alpha 2 [Source:MGI Symbol;Acc:MGI:88468]
ENSMUSG00000031220	-2.38272	4.22432	32.8099	1.01628e-08	1.00652e-05	chrX	-	100412587	100402221	NM_177746	Awat2	acyl-CoA wax alcohol acyltransferase 2 [Source:MGI Symbol;Acc:MGI:3045345]
ENSMUSG00000042807	-2.40075	5.27276	32.8708	9.84928e-09	1.00652e-05	chr1	-	54195034	53930813	NM_172655	Hecw2	HECT, C2 and WW domain containing E3 ubiquitin protein ligase 2 [Source:MGI Symbol;Acc:MGI:2685817]
ENSMUSG00000028838	-2.47156	4.19563	23.8743	1.02836e-06	0.000270678	chr4	-	134372558	134356372	NM_019578	Extl1	exostoses (multiple)-like 1 [Source:MGI Symbol;Acc:MGI:1888742]
ENSMUSG00000021186	-2.47793	2.48671	22.9235	1.68582e-06	0.000375238	chr12	-	101819055	101746565	NM_011812	Fbln5	fibulin 5 [Source:MGI Symbol;Acc:MGI:1346091]
ENSMUSG00000096215	-2.4907	-0.150489	18.6809	1.54526e-05	0.0016623	chr16	+	5007288	5008306	NM_001253802	Smim22	small integral membrane protein 22 [Source:MGI Symbol;Acc:MGI:3643379]
ENSMUSG00000038292	-2.49334	0.465107	8.96425	0.00275314	0.0453942	chr7	-	45204892	45183624	NM_201374	Ccdc155	coiled-coil domain containing 155 [Source:MGI Symbol;Acc:MGI:2687329]
ENSMUSG00000044217	-2.49708	1.59242	10.1185	0.00146792	0.0310952	chr15	+	99591028	99594829	NM_009701	Aqp5	aquaporin 5 [Source:MGI Symbol;Acc:MGI:106215]
ENSMUSG00000043251	-2.51712	4.19102	25.8472	3.69535e-07	0.000130615	chr8	-	105296098	105289924	NM_177788	Exoc3l	exocyst complex component 3-like [Source:MGI Symbol;Acc:MGI:3041195]
ENSMUSG00000101799	-2.53827	-0.0237831	18.898	1.37898e-05	0.00154079	chr1	-	51333779	51218386	NR_045151	9330175M20Rik	RIKEN cDNA 9330175M20 gene [Source:MGI Symbol;Acc:MGI:3045285]
ENSMUSG00000026380	-2.55331	0.938469	10.367	0.00128287	0.0288029	chr1	+	118627946	118685168	NM_023755	Tfcp2l1	transcription factor CP2-like 1 [Source:MGI Symbol;Acc:MGI:2444691]
ENSMUSG00000019929	-2.57743	2.07827	11.0132	0.00090466	0.0237719	chr10	+	97479500	97518162	NM_001190451	Dcn	decorin [Source:MGI Symbol;Acc:MGI:94872]
ENSMUSG00000059481	-2.57875	0.259982	14.1232	0.000171217	0.00868685	chr17	+	12378609	12419384	NM_008877	Plg	plasminogen [Source:MGI Symbol;Acc:MGI:97620]
ENSMUSG00000001506	-2.58487	4.47305	8.37478	0.00380464	0.0536073	chr11	+	94936224	94953042	NM_007742	Col1a1	collagen, type I, alpha 1 [Source:MGI Symbol;Acc:MGI:88467]
ENSMUSG00000039257	-2.62273	1.9128	19.8216	8.50144e-06	0.00113087	chr7	+	40899215	40930594	NM_021387	Vstm2b	V-set and transmembrane domain containing 2B [Source:MGI Symbol;Acc:MGI:1914525]
ENSMUSG00000073530	-2.62725	2.78837	21.3632	3.79997e-06	0.000652909	chr1	-	158958367	158711727	NM_001085376	Pappa2	pappalysin 2 [Source:MGI Symbol;Acc:MGI:3051647]
ENSMUSG00000025408	-2.6656	4.37433	11.7527	0.000607535	0.0185118	chr10	+	127290774	127296288	NM_007837	Ddit3	DNA-damage inducible transcript 3 [Source:MGI Symbol;Acc:MGI:109247]
ENSMUSG00000019278	-2.67089	6.15357	35.2817	2.85297e-09	4.41176e-06	chr8	+	123186235	123201810	NM_007876	Dpep1	dipeptidase 1 (renal) [Source:MGI Symbol;Acc:MGI:94917]
ENSMUSG00000025172	-2.68663	5.16345	23.6801	1.13752e-06	0.000271467	chr19	+	42036038	42045110	NM_020033	Ankrd2	ankyrin repeat domain 2 (stretch responsive muscle) [Source:MGI Symbol;Acc:MGI:1861447]
ENSMUSG00000032011	-2.73035	0.6809	23.7966	1.07072e-06	0.000271467	chr9	+	44043384	44048579	NM_009382	Thy1	thymus cell antigen 1, theta [Source:MGI Symbol;Acc:MGI:98747]
ENSMUSG00000028339	-2.73531	3.20106	11.4496	0.00071508	0.0207423	chr4	+	47208161	47313167	NM_009928	Col15a1	collagen, type XV, alpha 1 [Source:MGI Symbol;Acc:MGI:88449]
ENSMUSG00000030336	-2.74435	0.932849	18.3944	1.79585e-05	0.00179165	chr6	-	125237010	125232622	NM_001033126	Cd27	CD27 antigen [Source:MGI Symbol;Acc:MGI:88326]
ENSMUSG00000008461	-2.81996	0.389492	21.4102	3.70787e-06	0.000646057	chr7	+	45617606	45621059	NM_008051	Fut1	fucosyltransferase 1 [Source:MGI Symbol;Acc:MGI:109375]
ENSMUSG00000037664	-2.83823	7.15333	11.3704	0.000746221	0.0213199	chr7	-	143461050	143458350	NM_001161624	Cdkn1c	cyclin-dependent kinase inhibitor 1C (P57) [Source:MGI Symbol;Acc:MGI:104564]
ENSMUSG00000042216	-2.86649	-0.147121	20.8789	4.89247e-06	0.00075656	chr5	-	113310786	113243220	NM_172718	Sgsm1	small G protein signaling modulator 1 [Source:MGI Symbol;Acc:MGI:107320]
ENSMUSG00000078612	-2.89129	0.184318	20.1875	7.02111e-06	0.000965091	chr4	+	104913456	105016863	NM_001162980	1700024P16Rik	RIKEN cDNA 1700024P16 gene [Source:MGI Symbol;Acc:MGI:2685466]
ENSMUSG00000058260	-2.98421	0.959851	25.0699	5.52887e-07	0.000175379	chr12	-	104013652	103994743	NM_027997	Serpina9	serine (or cysteine) peptidase inhibitor, clade A (alpha-1 antiproteinase, antitrypsin), member 9 [Source:MGI Symbol;Acc:MGI:1919157]
ENSMUSG00000031297	-3.05034	3.74362	30.882	2.74198e-08	1.99535e-05	chrX	-	101085352	101079221	NM_007515	Slc7a3	solute carrier family 7 (cationic amino acid transporter, y+ system), member 3 [Source:MGI Symbol;Acc:MGI:1100521]
ENSMUSG00000037418	-3.10563	1.94257	25.5284	4.35924e-07	0.000149801	chr19	-	10001633	9985174	NM_011913	Best1	bestrophin 1 [Source:MGI Symbol;Acc:MGI:1346332]
ENSMUSG00000061740	-3.1076	0.813222	26.2154	3.0537e-07	0.000114581	chr15	-	82380260	82370528	NM_019823	Cyp2d22	cytochrome P450, family 2, subfamily d, polypeptide 22 [Source:MGI Symbol;Acc:MGI:1929474]
ENSMUSG00000024087	-3.32133	1.20433	9.05883	0.0026143	0.0441221	chr17	-	79715041	79706953	NM_009994	Cyp1b1	cytochrome P450, family 1, subfamily b, polypeptide 1 [Source:MGI Symbol;Acc:MGI:88590]
ENSMUSG00000005716	-3.32418	2.10287	15.66	7.58108e-05	0.00493294	chr15	-	78206400	78191117	NM_013645	Pvalb	parvalbumin [Source:MGI Symbol;Acc:MGI:97821]
ENSMUSG00000032715	-3.35636	4.55851	15.3228	9.06151e-05	0.00546478	chr2	-	152344032	152337422	NM_175093	Trib3	tribbles homolog 3 (Drosophila) [Source:MGI Symbol;Acc:MGI:1345675]
ENSMUSG00000045092	-3.43807	3.86056	47.8811	4.52857e-12	2.80114e-08	chr3	-	115715072	115710433	NM_007901	S1pr1	sphingosine-1-phosphate receptor 1 [Source:MGI Symbol;Acc:MGI:1096355]
ENSMUSG00000029032	-3.46161	2.06138	24.1853	8.74972e-07	0.00024054	chr4	-	154300054	154278486	NM_001112744	Arhgef16	Rho guanine nucleotide exchange factor (GEF) 16 [Source:MGI Symbol;Acc:MGI:2446219]
ENSMUSG00000009092	-3.73266	2.5635	32.5387	1.1684e-08	1.03245e-05	chr10	+	75893398	75895941	NM_024440	Derl3	Der1-like domain family, member 3 [Source:MGI Symbol;Acc:MGI:1917627]
ENSMUSG00000020176	-3.75619	7.39166	41.4338	1.21932e-10	5.02805e-07	chr11	-	12037401	11930508	NM_010345	Grb10	growth factor receptor bound protein 10 [Source:MGI Symbol;Acc:MGI:103232]
ENSMUSG00000001281	-3.98327	0.763917	23.7316	1.1075e-06	0.000271467	chr15	-	102231935	102215995	NM_013566	Itgb7	integrin beta 7 [Source:MGI Symbol;Acc:MGI:96616]
ENSMUSG00000030827	-4.57483	7.08455	39.9974	2.54305e-10	7.86502e-07	chr7	-	45615490	45613907	NM_020013	Fgf21	fibroblast growth factor 21 [Source:MGI Symbol;Acc:MGI:1861377]
ENSMUSG00000053101	-4.80586	0.184282	23.7232	1.11233e-06	0.000271467	chr13	-	19824257	19749682	NM_181754	Gpr141	G protein-coupled receptor 141 [Source:MGI Symbol;Acc:MGI:2672983]
ENSMUSG00000081683	-5.18506	1.36412	30.9042	2.71091e-08	1.99535e-05	chr5	+	128600844	128604093	NM_175284	Fzd10	frizzled homolog 10 (Drosophila) [Source:MGI Symbol;Acc:MGI:2136761]
ENSMUSG00000026069	-5.33549	3.59623	16.523	4.8064e-05	0.00349765	chr1	+	40429570	40446723	NM_001294171	Il1rl1	interleukin 1 receptor-like 1 [Source:MGI Symbol;Acc:MGI:98427]
ENSMUSG00000032291	-5.3478	3.20205	23.9069	1.01109e-06	0.000270678	chr9	+	54764748	54773110	NM_013496	Crabp1	cellular retinoic acid binding protein I [Source:MGI Symbol;Acc:MGI:88490]
ENSMUSG00000072591	-6.0954	0.940026	50.2311	1.36665e-12	1.69068e-08	chr5	-	128600687	128579106	NR_015517	5930412G12Rik	RIKEN cDNA 5930412G12 gene [Source:MGI Symbol;Acc:MGI:2442398]

## Sheet: Hfd_IrrVsCtrl
ensembl_gene_id	logFC	logCPM	LR	PValue	FDR	chromosome_name	strand	transcript_start	transcript_end	refseq_mrna	mgi_symbol	description
ENSMUSG00000031285	2.47539	3.61054	22.1577	2.51152e-06	0.0131298	chrX	-	143933311	143855842	NM_001110223	Dcx	doublecortin [Source:MGI Symbol;Acc:MGI:1277171]
ENSMUSG00000045092	-1.64204	3.86056	21.9493	2.79944e-06	0.0131298	chr3	-	115715072	115710433	NM_007901	S1pr1	sphingosine-1-phosphate receptor 1 [Source:MGI Symbol;Acc:MGI:1096355]
ENSMUSG00000022055	2.4203	4.45093	21.7023	3.18402e-06	0.0131298	chr14	+	68083863	68089095	NM_010910	Nefl	neurofilament, light polypeptide [Source:MGI Symbol;Acc:MGI:97313]
ENSMUSG00000067276	2.58016	4.12465	19.9698	7.86738e-06	0.0212407	chrX	-	143827414	143802231	NM_007603	Capn6	calpain 6 [Source:MGI Symbol;Acc:MGI:1100850]
ENSMUSG00000072591	-2.66398	0.940026	19.803	8.58489e-06	0.0212407	chr5	-	128600687	128579106	NR_015517	5930412G12Rik	RIKEN cDNA 5930412G12 gene [Source:MGI Symbol;Acc:MGI:2442398]
ENSMUSG00000031965	2.16109	1.59095	19.3818	1.07024e-05	0.0218787	chr9	-	24774303	24720812	NM_194263	Tbx20	T-box 20 [Source:MGI Symbol;Acc:MGI:1888496]
ENSMUSG00000033196	4.70707	5.49486	19.1038	1.23798e-05	0.0218787	chr11	+	67171027	67197517	NM_001039545	Myh2	myosin, heavy polypeptide 2, skeletal muscle, adult [Source:MGI Symbol;Acc:MGI:1339710]
ENSMUSG00000022054	1.7745	2.74272	17.8124	2.43787e-05	0.0376986	chr14	-	68124846	68119283	NM_008691	Nefm	neurofilament, medium polypeptide [Source:MGI Symbol;Acc:MGI:97314]
ENSMUSG00000049630	3.02382	3.29876	16.5998	4.61571e-05	0.0616845	chr2	-	13011806	13003457	NM_153155	C1ql3	C1q-like 3 [Source:MGI Symbol;Acc:MGI:2387350]
ENSMUSG00000020176	-1.65636	7.39166	16.3371	5.30145e-05	0.0616845	chr11	-	12037401	11930508	NM_010345	Grb10	growth factor receptor bound protein 10 [Source:MGI Symbol;Acc:MGI:103232]
ENSMUSG00000044350	-1.00208	4.82602	16.118	5.95165e-05	0.0616845	chr14	-	77036641	77024200	NM_172488	Lacc1	laccase (multicopper oxidoreductase) domain containing 1 [Source:MGI Symbol;Acc:MGI:2445077]
ENSMUSG00000061601	1.32661	1.23425	16.1079	5.98346e-05	0.0616845	chr5	+	14514918	14795993	NM_001110796	Pclo	piccolo (presynaptic cytomatrix protein) [Source:MGI Symbol;Acc:MGI:1349390]
ENSMUSG00000052854	1.34645	2.49103	15.4223	8.59672e-05	0.0768241	chrX	+	138914430	139009092	NM_013724	Nrk	Nik related kinase [Source:MGI Symbol;Acc:MGI:1351326]
ENSMUSG00000056296	1.41908	0.207448	15.3928	8.73207e-05	0.0768241	chr14	+	13284780	13615459	NM_028052	Synpr	synaptoporin [Source:MGI Symbol;Acc:MGI:1919253]
ENSMUSG00000042807	-1.15602	5.27276	15.2707	9.31502e-05	0.0768241	chr1	-	54195034	53930813	NM_172655	Hecw2	HECT, C2 and WW domain containing E3 ubiquitin protein ligase 2 [Source:MGI Symbol;Acc:MGI:2685817]
ENSMUSG00000054423	2.42191	1.59416	14.5759	0.000134625	0.0956265	chr14	-	12823079	12372565	NM_001042617	Cadps	Ca2+-dependent secretion activator [Source:MGI Symbol;Acc:MGI:1350922]
ENSMUSG00000019278	-1.20845	6.15357	14.53	0.000137943	0.0956265	chr8	+	123186235	123201810	NM_007876	Dpep1	dipeptidase 1 (renal) [Source:MGI Symbol;Acc:MGI:94917]
ENSMUSG00000040856	1.82173	0.538379	14.5138	0.000139138	0.0956265	chr12	+	109453455	109460700	NM_010052	Dlk1	delta-like 1 homolog (Drosophila) [Source:MGI Symbol;Acc:MGI:94900]

## Sheet: Ch_IrrVsCtrl
ensembl_gene_id	logFC	logCPM	LR	PValue	FDR	chromosome_name	strand	transcript_start	transcript_end	refseq_mrna	mgi_symbol	description
ENSMUSG00000072591	-3.43142	0.940026	30.8123	2.84233e-08	0.000312613	chr5	-	128600687	128579106	NR_015517	5930412G12Rik	RIKEN cDNA 5930412G12 gene [Source:MGI Symbol;Acc:MGI:2442398]
ENSMUSG00000030827	-2.84356	7.08455	29.5632	5.41234e-08	0.000312613	chr7	-	45615490	45613907	NM_020013	Fgf21	fibroblast growth factor 21 [Source:MGI Symbol;Acc:MGI:1861377]
ENSMUSG00000032011	-2.19827	0.6809	28.9103	7.58094e-08	0.000312613	chr9	+	44043384	44048579	NM_009382	Thy1	thymus cell antigen 1, theta [Source:MGI Symbol;Acc:MGI:98747]
ENSMUSG00000031297	-2.03845	3.74362	26.6589	2.42731e-07	0.000702509	chrX	-	101085352	101079221	NM_007515	Slc7a3	solute carrier family 7 (cationic amino acid transporter, y+ system), member 3 [Source:MGI Symbol;Acc:MGI:1100521]
ENSMUSG00000029814	0.89047	4.63184	26.1948	3.08645e-07	0.000702509	chr6	-	49214954	49085221	NM_023670	Igf2bp3	insulin-like growth factor 2 mRNA binding protein 3 [Source:MGI Symbol;Acc:MGI:1890359]
ENSMUSG00000045092	-1.79603	3.86056	26.0039	3.4072e-07	0.000702509	chr3	-	115715072	115710433	NM_007901	S1pr1	sphingosine-1-phosphate receptor 1 [Source:MGI Symbol;Acc:MGI:1096355]
ENSMUSG00000020176	-2.09983	7.39166	25.5117	4.39703e-07	0.000707797	chr11	-	12037401	11930508	NM_010345	Grb10	growth factor receptor bound protein 10 [Source:MGI Symbol;Acc:MGI:103232]
ENSMUSG00000008461	-2.23575	0.389492	25.4343	4.57713e-07	0.000707797	chr7	+	45617606	45621059	NM_008051	Fut1	fucosyltransferase 1 [Source:MGI Symbol;Acc:MGI:109375]
ENSMUSG00000005667	-0.922711	7.28244	24.8194	6.29596e-07	0.000865414	chr6	-	83317606	83305691	NM_008638	Mthfd2	methylenetetrahydrofolate dehydrogenase (NAD+ dependent), methenyltetrahydrofolate cyclohydrolase [Source:MGI Symbol;Acc:MGI:1338850]
ENSMUSG00000024640	-0.997239	8.81155	23.943	9.92303e-07	0.00116824	chr19	-	15925059	15904678	NM_177420	Psat1	phosphoserine aminotransferase 1 [Source:MGI Symbol;Acc:MGI:2183441]
ENSMUSG00000061740	-2.1415	0.813222	23.8549	1.03877e-06	0.00116824	chr15	-	82380260	82370528	NM_019823	Cyp2d22	cytochrome P450, family 2, subfamily d, polypeptide 22 [Source:MGI Symbol;Acc:MGI:1929474]
ENSMUSG00000075225	-1.17928	4.03282	22.7198	1.87427e-06	0.00193221	chr10	-	41606595	41538849	NM_001303469	Ccdc162	coiled-coil domain containing 162 [Source:MGI Symbol;Acc:MGI:1923223]
ENSMUSG00000001281	-2.78345	0.763917	22.4299	2.17949e-06	0.00202984	chr15	-	102231935	102215995	NM_013566	Itgb7	integrin beta 7 [Source:MGI Symbol;Acc:MGI:96616]
ENSMUSG00000030284	-0.87687	6.5813	22.329	2.29713e-06	0.00202984	chr6	+	113483297	113493338	NM_133930	Creld1	cysteine-rich with EGF-like domains 1 [Source:MGI Symbol;Acc:MGI:2152539]
ENSMUSG00000027890	-0.917836	2.42887	21.9708	2.76837e-06	0.00220087	chr3	-	108044894	108040408	NM_026764	Gstm4	glutathione S-transferase, mu 4 [Source:MGI Symbol;Acc:MGI:95862]
ENSMUSG00000033377	1.95657	3.7209	21.9173	2.84649e-06	0.00220087	chr3	-	116968987	116918258	NM_023245	Palmd	palmdelphin [Source:MGI Symbol;Acc:MGI:2148896]
ENSMUSG00000019278	-1.46244	6.15357	21.0214	4.5419e-06	0.00330517	chr8	+	123186235	123201810	NM_007876	Dpep1	dipeptidase 1 (renal) [Source:MGI Symbol;Acc:MGI:94917]
ENSMUSG00000029752	-0.865224	8.37024	20.2772	6.6993e-06	0.00460428	chr6	-	7693254	7675169	NM_012055	Asns	asparagine synthetase [Source:MGI Symbol;Acc:MGI:1350929]
ENSMUSG00000037685	0.753515	4.31121	19.847	8.38931e-06	0.00546233	chr5	-	67847370	67618140	NM_009727	Atp8a1	ATPase, aminophospholipid transporter (APLT), class I, type 8A, member 1 [Source:MGI Symbol;Acc:MGI:1330848]
ENSMUSG00000031220	-1.307	4.22432	19.6468	9.31579e-06	0.00576228	chrX	-	100412587	100402221	NM_177746	Awat2	acyl-CoA wax alcohol acyltransferase 2 [Source:MGI Symbol;Acc:MGI:3045345]
ENSMUSG00000009092	-2.05161	2.5635	19.3793	1.07164e-05	0.00631296	chr10	+	75893398	75895941	NM_024440	Derl3	Der1-like domain family, member 3 [Source:MGI Symbol;Acc:MGI:1917627]
ENSMUSG00000039629	0.901187	3.62107	18.5162	1.68465e-05	0.00910992	chr6	+	29917013	29959681	NM_001037740	Strip2	striatin interacting protein 2 [Source:MGI Symbol;Acc:MGI:2444363]
ENSMUSG00000028838	-1.54981	4.19563	18.4554	1.73923e-05	0.00910992	chr4	-	134372558	134356372	NM_019578	Extl1	exostoses (multiple)-like 1 [Source:MGI Symbol;Acc:MGI:1888742]
ENSMUSG00000025608	1.69599	3.2465	18.4249	1.76734e-05	0.00910992	chr6	-	31563981	31519488	NM_013723	Podxl	podocalyxin-like [Source:MGI Symbol;Acc:MGI:1351317]
ENSMUSG00000081683	-2.83095	1.36412	18.0927	2.10405e-05	0.0104117	chr5	+	128600844	128604093	NM_175284	Fzd10	frizzled homolog 10 (Drosophila) [Source:MGI Symbol;Acc:MGI:2136761]
ENSMUSG00000031770	-0.773398	7.38776	17.7074	2.57618e-05	0.0122331	chr8	+	94386438	94395377	NM_022331	Herpud1	homocysteine-inducible, endoplasmic reticulum stress-inducible, ubiquitin-like domain member 1 [Source:MGI Symbol;Acc:MGI:1927406]
ENSMUSG00000042807	-1.24474	5.27276	17.6395	2.6699e-05	0.0122331	chr1	-	54195034	53930813	NM_172655	Hecw2	HECT, C2 and WW domain containing E3 ubiquitin protein ligase 2 [Source:MGI Symbol;Acc:MGI:2685817]
ENSMUSG00000031700	-0.694352	7.61044	17.4988	2.87491e-05	0.012702	chr8	+	85492576	85527560	NM_173866	Gpt2	glutamic pyruvate transaminase (alanine aminotransferase) 2 [Source:MGI Symbol;Acc:MGI:1915391]
ENSMUSG00000005716	-2.55581	2.10287	17.3822	3.05671e-05	0.0130395	chr15	-	78206400	78191117	NM_013645	Pvalb	parvalbumin [Source:MGI Symbol;Acc:MGI:97821]
ENSMUSG00000000889	1.28861	1.03755	17.2248	3.32073e-05	0.013295	chr2	+	27165233	27183200	NM_138942	Dbh	dopamine beta hydroxylase [Source:MGI Symbol;Acc:MGI:94864]
ENSMUSG00000070287	-1.3995	0.658921	17.1741	3.41046e-05	0.013295	chr9	-	100571090	100552188	NM_001101483	Slc35g2	solute carrier family 35, member G2 [Source:MGI Symbol;Acc:MGI:2685365]
ENSMUSG00000031285	2.14169	3.61054	17.116	3.51651e-05	0.013295	chrX	-	143933311	143855842	NM_001110223	Dcx	doublecortin [Source:MGI Symbol;Acc:MGI:1277171]
ENSMUSG00000040856	1.90644	0.538379	17.0999	3.54648e-05	0.013295	chr12	+	109453455	109460700	NM_010052	Dlk1	delta-like 1 homolog (Drosophila) [Source:MGI Symbol;Acc:MGI:94900]
ENSMUSG00000031965	2.0163	1.59095	16.9043	3.93134e-05	0.0138702	chr9	-	24774303	24720812	NM_194263	Tbx20	T-box 20 [Source:MGI Symbol;Acc:MGI:1888496]
ENSMUSG00000028643	-0.907925	6.95201	16.783	4.19074e-05	0.0138702	chr4	+	119195306	119201298	NM_024462	Ccdc23	coiled-coil domain containing 23 [Source:MGI Symbol;Acc:MGI:1916466]
ENSMUSG00000034245	-0.776754	4.85624	16.7754	4.2075e-05	0.0138702	chr6	+	91156665	91174692	NM_144919	Hdac11	histone deacetylase 11 [Source:MGI Symbol;Acc:MGI:2385252]
ENSMUSG00000010803	1.72775	1.10525	16.7585	4.24526e-05	0.0138702	chr11	-	42182930	42130939	NM_010250	Gabra1	gamma-aminobutyric acid (GABA) A receptor, subunit alpha 1 [Source:MGI Symbol;Acc:MGI:95613]
ENSMUSG00000027500	1.71351	2.99149	16.7517	4.26052e-05	0.0138702	chr3	+	8509360	8561606	NM_025285	Stmn2	stathmin-like 2 [Source:MGI Symbol;Acc:MGI:98241]
ENSMUSG00000061601	1.33523	1.23425	16.6293	4.54427e-05	0.0144147	chr5	+	14514918	14795993	NM_001110796	Pclo	piccolo (presynaptic cytomatrix protein) [Source:MGI Symbol;Acc:MGI:1349390]
ENSMUSG00000025172	-1.59415	5.16345	16.4493	4.99678e-05	0.0151755	chr19	+	42036038	42045110	NM_020033	Ankrd2	ankyrin repeat domain 2 (stretch responsive muscle) [Source:MGI Symbol;Acc:MGI:1861447]
ENSMUSG00000019817	1.22394	4.95312	16.3935	5.14609e-05	0.0151755	chr10	+	13090788	13131694	NM_009538	Plagl1	pleiomorphic adenoma gene-like 1 [Source:MGI Symbol;Acc:MGI:1100874]
ENSMUSG00000003559	-1.17393	2.41934	16.3851	5.16911e-05	0.0151755	chr19	+	46707443	46741095	NM_020577	As3mt	arsenic (+3 oxidation state) methyltransferase [Source:MGI Symbol;Acc:MGI:1929882]
ENSMUSG00000058260	-1.71512	0.959851	16.3461	5.27649e-05	0.0151755	chr12	-	104013652	103994743	NM_027997	Serpina9	serine (or cysteine) peptidase inhibitor, clade A (alpha-1 antiproteinase, antitrypsin), member 9 [Source:MGI Symbol;Acc:MGI:1919157]
ENSMUSG00000004633	1.4058	1.19135	16.3031	5.39747e-05	0.0151755	chr6	+	54039573	54300721	NM_001163640	Chn2	chimerin 2 [Source:MGI Symbol;Acc:MGI:1917243]
ENSMUSG00000031871	-3.02944	0.326828	16.174	5.77807e-05	0.0158432	chr8	+	104101625	104144502	NM_009868	Cdh5	cadherin 5 [Source:MGI Symbol;Acc:MGI:105057]
ENSMUSG00000029661	-1.49968	6.07028	16.1321	5.90742e-05	0.0158432	chr6	+	4505493	4541543	NM_007743	Col1a2	collagen, type I, alpha 2 [Source:MGI Symbol;Acc:MGI:88468]
ENSMUSG00000007034	-1.10854	1.71097	16.0966	6.01917e-05	0.0158432	chr17	+	34914470	34930356	NM_023557	Slc44a4	solute carrier family 44, member 4 [Source:MGI Symbol;Acc:MGI:1917379]
ENSMUSG00000060002	-0.804236	6.21958	16.0166	6.27892e-05	0.0161826	chr10	-	88503970	88472817	NM_144807	Chpt1	choline phosphotransferase 1 [Source:MGI Symbol;Acc:MGI:2384841]
ENSMUSG00000001642	-0.756023	8.44541	15.9655	6.45072e-05	0.0162861	chr6	-	34317478	34303934	NM_009658	Akr1b3	aldo-keto reductase family 1, member B3 (aldose reductase) [Source:MGI Symbol;Acc:MGI:1353494]
ENSMUSG00000040010	-0.919249	8.44735	15.9082	6.64912e-05	0.0164513	chr8	-	121907694	121881150	NM_011404	Slc7a5	solute carrier family 7 (cationic amino acid transporter, y+ system), member 5 [Source:MGI Symbol;Acc:MGI:1298205]
ENSMUSG00000020256	-1.00949	5.96832	15.856	6.83511e-05	0.0164631	chr10	-	83534140	83487450	NM_153543	Aldh1l2	aldehyde dehydrogenase 1 family, member L2 [Source:MGI Symbol;Acc:MGI:2444680]
ENSMUSG00000048490	0.479113	6.10959	15.7986	7.04547e-05	0.0164631	chr16	-	76373049	76290862	NM_173440	Nrip1	nuclear receptor interacting protein 1 [Source:MGI Symbol;Acc:MGI:1315213]
ENSMUSG00000044468	0.992631	2.8655	15.7965	7.05316e-05	0.0164631	chr3	-	100489324	100468057	NM_001142952	Fam46c	family with sequence similarity 46, member C [Source:MGI Symbol;Acc:MGI:1921895]
ENSMUSG00000020653	0.552769	4.28851	15.7186	7.34973e-05	0.0168377	chr12	+	24651371	24662774	NM_178357	Klf11	Kruppel-like factor 11 [Source:MGI Symbol;Acc:MGI:2653368]
ENSMUSG00000043251	-1.38837	4.19102	15.615	7.76357e-05	0.0169044	chr8	-	105296098	105289924	NM_177788	Exoc3l	exocyst complex component 3-like [Source:MGI Symbol;Acc:MGI:3041195]
ENSMUSG00000004929	-0.810217	7.94055	15.5831	7.89567e-05	0.0169044	chr10	+	81070035	81082559	NM_022653	Thop1	thimet oligopeptidase 1 [Source:MGI Symbol;Acc:MGI:1354165]
ENSMUSG00000036019	0.824888	2.69775	15.5783	7.91573e-05	0.0169044	chr10	-	105574435	105187663	NM_177368	Tmtc2	transmembrane and tetratricopeptide repeat containing 2 [Source:MGI Symbol;Acc:MGI:1914057]
ENSMUSG00000078949	-0.973951	5.8053	15.5476	8.0455e-05	0.0169044	chr2	+	163492318	163502612	NM_001099331	R3hdml	R3H domain containing-like [Source:MGI Symbol;Acc:MGI:3650937]
ENSMUSG00000035048	-0.758276	4.50711	15.5391	8.08157e-05	0.0169044	chr9	+	102626296	102634425	NM_181394	Anapc13	anaphase promoting complex subunit 13 [Source:MGI Symbol;Acc:MGI:1916260]
ENSMUSG00000021944	1.15665	2.15731	15.4957	8.2692e-05	0.0169044	chr14	-	63245248	63198922	NM_008092	Gata4	GATA binding protein 4 [Source:MGI Symbol;Acc:MGI:95664]
ENSMUSG00000078350	-1.03524	2.84128	15.4712	8.37709e-05	0.0169044	chr4	-	154026230	154021456	NM_001163721	Smim1	small integral membrane protein 1 [Source:MGI Symbol;Acc:MGI:1916109]
ENSMUSG00000027009	1.3546	6.88544	15.4499	8.47202e-05	0.0169044	chr2	+	79255500	79333123	NM_010576	Itga4	integrin alpha 4 [Source:MGI Symbol;Acc:MGI:96603]
ENSMUSG00000039046	0.635392	5.45672	15.4043	8.67918e-05	0.0169795	chr2	+	6322667	6446390	NM_001080548	Usp6nl	USP6 N-terminal like [Source:MGI Symbol;Acc:MGI:2138893]
ENSMUSG00000052516	1.74875	0.205295	15.3531	8.91729e-05	0.0169795	chr16	-	74410989	73892306	NM_175549	Robo2	roundabout homolog 2 (Drosophila) [Source:MGI Symbol;Acc:MGI:1890110]
ENSMUSG00000026253	-0.673676	8.97233	15.3125	9.11132e-05	0.0169795	chr1	+	87205811	87212694	NM_009604	Chrng	cholinergic receptor, nicotinic, gamma polypeptide [Source:MGI Symbol;Acc:MGI:87895]
ENSMUSG00000032291	-3.07363	3.20205	15.3089	9.12847e-05	0.0169795	chr9	+	54764748	54773110	NM_013496	Crabp1	cellular retinoic acid binding protein I [Source:MGI Symbol;Acc:MGI:88490]
ENSMUSG00000049565	-0.854867	2.94244	15.295	9.19594e-05	0.0169795	chr3	+	108739658	108782309	NM_177859	Aknad1	AKNA domain containing 1 [Source:MGI Symbol;Acc:MGI:3584453]
ENSMUSG00000022215	-0.718066	4.848	15.1853	9.74586e-05	0.0176548	chr14	+	55575617	55576952	NM_026808	Fitm1	fat storage-inducing transmembrane protein 1 [Source:MGI Symbol;Acc:MGI:1915930]
ENSMUSG00000024664	-0.736929	8.59491	15.1658	9.84708e-05	0.0176548	chr19	+	10041548	10059671	NM_021890	Fads3	fatty acid desaturase 3 [Source:MGI Symbol;Acc:MGI:1928740]
ENSMUSG00000054423	2.46561	1.59416	15.0852	0.000102765	0.0181615	chr14	-	12823079	12372565	NM_001042617	Cadps	Ca2+-dependent secretion activator [Source:MGI Symbol;Acc:MGI:1350922]
ENSMUSG00000042680	0.690191	2.73253	15.0522	0.000104579	0.0182218	chr18	-	21300138	21127201	NM_001033445	Garem	GRB2 associated, regulator of MAPK1 [Source:MGI Symbol;Acc:MGI:2685790]
ENSMUSG00000018845	-0.78538	7.30518	14.9915	0.000107994	0.0185555	chr11	+	82911253	82943403	NM_178680	Unc45b	unc-45 homolog B (C. elegans) [Source:MGI Symbol;Acc:MGI:2443377]
ENSMUSG00000037418	-1.68555	1.94257	14.9169	0.00011235	0.0190395	chr19	-	10001633	9985174	NM_011913	Best1	bestrophin 1 [Source:MGI Symbol;Acc:MGI:1346332]
ENSMUSG00000030399	-1.50186	6.71173	14.7351	0.000123722	0.0206834	chr7	+	19411094	19421583	NM_007710	Ckm	creatine kinase, muscle [Source:MGI Symbol;Acc:MGI:88413]
ENSMUSG00000033044	-1.01945	5.7417	14.6742	0.000127786	0.021078	chr11	+	67798271	67815999	NM_001013013	Dhrs7c	dehydrogenase/reductase (SDR family) member 7C [Source:MGI Symbol;Acc:MGI:1915710]
ENSMUSG00000058672	-0.808401	8.05301	14.5827	0.000134141	0.0213665	chr13	-	34078008	34074301	NM_009450	Tubb2a	tubulin, beta 2A class IIA [Source:MGI Symbol;Acc:MGI:107861]
ENSMUSG00000096215	-1.5584	-0.150489	14.5702	0.000135031	0.0213665	chr16	+	5007288	5008306	NM_001253802	Smim22	small integral membrane protein 22 [Source:MGI Symbol;Acc:MGI:3643379]
ENSMUSG00000025140	-0.877894	4.26236	14.5608	0.000135709	0.0213665	chr11	-	120643670	120635712	NM_144795	Pycr1	pyrroline-5-carboxylate reductase 1 [Source:MGI Symbol;Acc:MGI:2384795]
ENSMUSG00000079440	-1.48172	0.336954	14.5506	0.000136445	0.0213665	chr1	-	87101606	87098002	NM_001081082	Alpi	alkaline phosphatase, intestinal [Source:MGI Symbol;Acc:MGI:1924018]
ENSMUSG00000003031	-0.502634	5.04802	14.387	0.000148828	0.0230143	chr6	+	134920401	134925513	NM_009875	Cdkn1b	cyclin-dependent kinase inhibitor 1B [Source:MGI Symbol;Acc:MGI:104565]
ENSMUSG00000024855	0.545099	4.78406	14.3406	0.000152536	0.0232965	chr19	-	5273119	5133688	NM_153129	Pacs1	phosphofurin acidic cluster sorting protein 1 [Source:MGI Symbol;Acc:MGI:1277113]
ENSMUSG00000021203	-0.81867	4.92417	14.1791	0.000166202	0.0250742	chr12	+	103388682	103406339	NM_001177841	Otub2	OTU domain, ubiquitin aldehyde binding 2 [Source:MGI Symbol;Acc:MGI:1915399]
ENSMUSG00000001494	2.5867	1.48562	14.0545	0.000177591	0.0256509	chr11	-	101967015	101962458	NM_024449	Sost	sclerostin [Source:MGI Symbol;Acc:MGI:1921749]
ENSMUSG00000010095	-0.810906	7.53056	14.0486	0.000178148	0.0256509	chr19	-	8723369	8706882	NM_001161413	Slc3a2	solute carrier family 3 (activators of dibasic and neutral amino acid transport), member 2 [Source:MGI Symbol;Acc:MGI:96955]
ENSMUSG00000001053	-0.785573	5.22085	14.0405	0.000178918	0.0256509	chr11	-	51650842	51643063	NM_145974	N4bp3	NEDD4 binding protein 3 [Source:MGI Symbol;Acc:MGI:2442218]
ENSMUSG00000039529	-0.882122	1.10925	14.0284	0.000180074	0.0256509	chr18	-	64661000	64528979	NM_001001488	Atp8b1	ATPase, class I, type 8B, member 1 [Source:MGI Symbol;Acc:MGI:1859665]
ENSMUSG00000010755	-0.423962	7.27814	14.0104	0.000181798	0.0256509	chr7	-	143600090	143557230	NM_013742	Cars	cysteinyl-tRNA synthetase [Source:MGI Symbol;Acc:MGI:1351477]
ENSMUSG00000038539	-0.846104	6.63447	14.0036	0.000182465	0.0256509	chr7	-	44815658	44812257	NM_030693	Atf5	activating transcription factor 5 [Source:MGI Symbol;Acc:MGI:2141857]
ENSMUSG00000020788	-1.21945	3.34214	13.9657	0.00018618	0.025879	chr11	+	72961169	72993043	NM_001163337	Atp2a3	ATPase, Ca++ transporting, ubiquitous [Source:MGI Symbol;Acc:MGI:1194503]
ENSMUSG00000030693	-1.18979	0.82585	13.7542	0.000208358	0.0284024	chr7	+	43781054	43785410	NM_133712	Klk10	kallikrein related-peptidase 10 [Source:MGI Symbol;Acc:MGI:1916790]
ENSMUSG00000025485	-0.554826	7.04324	13.7491	0.000208925	0.0284024	chr7	+	140856957	140863730	NM_053194	Ric8	resistance to inhibitors of cholinesterase 8 homolog (C. elegans) [Source:MGI Symbol;Acc:MGI:2141866]
ENSMUSG00000021768	-0.663825	5.54865	13.6893	0.000215681	0.0284545	chr14	-	21742879	21733395	NM_013849	Dusp13	dual specificity phosphatase 13 [Source:MGI Symbol;Acc:MGI:1351599]
ENSMUSG00000053846	-1.29735	1.31155	13.6807	0.000216666	0.0284545	chr18	-	74961263	74939322	NM_010720	Lipg	lipase, endothelial [Source:MGI Symbol;Acc:MGI:1341803]
ENSMUSG00000018339	-0.828619	6.06291	13.6799	0.000216765	0.0284545	chr11	+	54902772	54910377	NM_008161	Gpx3	glutathione peroxidase 3 [Source:MGI Symbol;Acc:MGI:105102]
ENSMUSG00000073530	-1.49314	2.78837	13.6648	0.000218509	0.0284545	chr1	-	158958367	158711727	NM_001085376	Pappa2	pappalysin 2 [Source:MGI Symbol;Acc:MGI:3051647]
ENSMUSG00000067276	2.09162	4.12465	13.6241	0.000223298	0.0287752	chrX	-	143827414	143802231	NM_007603	Capn6	calpain 6 [Source:MGI Symbol;Acc:MGI:1100850]
ENSMUSG00000061758	-0.472853	4.95147	13.59	0.000227399	0.0290015	chr6	+	34384218	34396950	NM_172398	Akr1b10	aldo-keto reductase family 1, member B10 (aldose reductase) [Source:MGI Symbol;Acc:MGI:1915111]
ENSMUSG00000001864	-0.719331	8.4438	13.5135	0.000236853	0.029899	chr2	+	31950139	31973442	NM_145144	Aif1l	allograft inflammatory factor 1-like [Source:MGI Symbol;Acc:MGI:1919598]
ENSMUSG00000038916	1.35347	2.31206	13.4536	0.000244539	0.0304651	chr10	+	29143996	29199630	NM_026138	Soga3	SOGA family member 3 [Source:MGI Symbol;Acc:MGI:1914662]
ENSMUSG00000040605	1.10744	1.77378	13.4404	0.000246262	0.0304651	chr16	+	97356728	97439012	NM_019517	Bace2	beta-site APP-cleaving enzyme 2 [Source:MGI Symbol;Acc:MGI:1860440]
ENSMUSG00000040274	0.767883	6.86509	13.4008	0.000251521	0.0308076	chr5	+	3344312	3522225	NM_009873	Cdk6	cyclin-dependent kinase 6 [Source:MGI Symbol;Acc:MGI:1277162]
ENSMUSG00000032452	1.21256	2.09158	13.3094	0.000264075	0.0320282	chr9	-	98033181	97444395	NM_022319	Clstn2	calsyntenin 2 [Source:MGI Symbol;Acc:MGI:1929897]
ENSMUSG00000024339	-0.679312	3.56754	13.2751	0.000268951	0.0323029	chr17	+	34203527	34216321	NM_011530	Tap2	transporter 2, ATP-binding cassette, sub-family B (MDR/TAP) [Source:MGI Symbol;Acc:MGI:98484]
ENSMUSG00000075706	-0.664569	8.23977	13.2375	0.000274408	0.032501	chr10	+	80047166	80056439	NR_110342	Gpx4	glutathione peroxidase 4 [Source:MGI Symbol;Acc:MGI:104767]
ENSMUSG00000053646	0.740568	5.39613	13.2272	0.000275922	0.032501	chr9	+	109095389	109119917	NM_172775	Plxnb1	plexin B1 [Source:MGI Symbol;Acc:MGI:2154238]
ENSMUSG00000004056	-0.580438	8.6761	13.2098	0.000278483	0.032501	chr7	+	27591552	27640826	NM_001110208	Akt2	thymoma viral proto-oncogene 2 [Source:MGI Symbol;Acc:MGI:104874]
ENSMUSG00000021186	-1.33073	2.48671	13.1595	0.000286059	0.0330732	chr12	-	101819055	101746565	NM_011812	Fbln5	fibulin 5 [Source:MGI Symbol;Acc:MGI:1346091]
ENSMUSG00000023883	-0.814621	6.93105	13.1384	0.000289303	0.0331386	chr17	-	14961273	14945009	NM_024250	Phf10	PHD finger protein 10 [Source:MGI Symbol;Acc:MGI:1919307]
ENSMUSG00000029777	-0.536804	8.76036	13.0486	0.000303512	0.0342486	chr6	+	55038001	55079504	NM_180678	Gars	glycyl-tRNA synthetase [Source:MGI Symbol;Acc:MGI:2449057]
ENSMUSG00000022269	1.15307	1.65336	13.0423	0.00030453	0.0342486	chr15	+	26309064	26409576	NM_177597	March11	membrane-associated ring finger (C3HC4) 11 [Source:MGI Symbol;Acc:MGI:3608327]
ENSMUSG00000101799	-1.50721	-0.0237831	13.0241	0.000307514	0.0342726	chr1	-	51333779	51218386	NR_045151	9330175M20Rik	RIKEN cDNA 9330175M20 gene [Source:MGI Symbol;Acc:MGI:3045285]
ENSMUSG00000021196	-0.488921	5.20374	12.9442	0.000320919	0.035057	chr13	-	6648725	6581182	NM_001291071	Pfkp	phosphofructokinase, platelet [Source:MGI Symbol;Acc:MGI:1891833]
ENSMUSG00000033278	0.827118	3.94257	12.9327	0.000322896	0.035057	chr17	-	67354459	66666848	NM_008984	Ptprm	protein tyrosine phosphatase, receptor type, M [Source:MGI Symbol;Acc:MGI:102694]
ENSMUSG00000031778	1.06686	5.57049	12.9318	0.000323053	0.035057	chr8	+	94772009	94782423	NM_009142	Cx3cl1	chemokine (C-X3-C motif) ligand 1 [Source:MGI Symbol;Acc:MGI:1097153]
ENSMUSG00000043259	-1.09248	3.21558	12.9119	0.0003265	0.0351228	chr10	+	70440880	70558729	NM_001143776	Fam13c	family with sequence similarity 13, member C [Source:MGI Symbol;Acc:MGI:1918971]
ENSMUSG00000039179	-1.07823	3.4686	12.7624	0.000353663	0.0375483	chr16	-	10395490	10357948	NM_001291001	Tekt5	tektin 5 [Source:MGI Symbol;Acc:MGI:1917676]
ENSMUSG00000039835	0.781295	4.19096	12.7409	0.000357738	0.0375483	chr10	+	18407675	18533892	NM_173390	Nhsl1	NHS-like 1 [Source:MGI Symbol;Acc:MGI:106390]
ENSMUSG00000048915	0.94289	2.13281	12.7273	0.000360356	0.0375483	chr17	-	62881317	62604184	NM_207654	Efna5	ephrin A5 [Source:MGI Symbol;Acc:MGI:107444]
ENSMUSG00000034330	0.906477	2.4946	12.723	0.000361187	0.0375483	chr8	+	117498291	117635140	NM_172285	Plcg2	phospholipase C, gamma 2 [Source:MGI Symbol;Acc:MGI:97616]
ENSMUSG00000039202	0.650938	7.4109	12.6506	0.000375452	0.038706	chr7	+	79273201	79365508	NM_018811	Abhd2	abhydrolase domain containing 2 [Source:MGI Symbol;Acc:MGI:1914344]
ENSMUSG00000042331	0.733484	4.91261	12.622	0.000381232	0.0387786	chr11	+	62029253	62221129	NM_001281818	Specc1	sperm antigen with calponin homology and coiled-coil domains 1 [Source:MGI Symbol;Acc:MGI:2442356]
ENSMUSG00000004460	-0.66958	7.53303	12.6022	0.000385294	0.0387786	chr16	+	22857845	22872388	NM_001190804	Dnajb11	DnaJ (Hsp40) homolog, subfamily B, member 11 [Source:MGI Symbol;Acc:MGI:1915088]
ENSMUSG00000034533	-0.946489	2.11952	12.6009	0.000385561	0.0387786	chr9	-	119719032	119608456	NM_001205321	Scn10a	sodium channel, voltage-gated, type X, alpha [Source:MGI Symbol;Acc:MGI:108029]
ENSMUSG00000024663	-0.907353	3.79187	12.5466	0.000396932	0.0396004	chr19	+	10018193	10035456	NM_144538	Rab3il1	RAB3A interacting protein (rabin3)-like 1 [Source:MGI Symbol;Acc:MGI:1922010]
ENSMUSG00000079471	-0.970174	6.70341	12.525	0.000401532	0.0397389	chr17	-	45602102	45600967	NM_001177469	Gm7325	predicted gene 7325 [Source:MGI Symbol;Acc:MGI:3649059]
ENSMUSG00000046814	-0.925416	3.33744	12.4991	0.000407157	0.0399757	chr2	+	119167773	119172390	NM_177157	Gchfr	GTP cyclohydrolase I feedback regulator [Source:MGI Symbol;Acc:MGI:2443977]
ENSMUSG00000053398	-0.530056	9.23389	12.4459	0.000418903	0.0408051	chr3	-	98339990	98313170	NM_016966	Phgdh	3-phosphoglycerate dehydrogenase [Source:MGI Symbol;Acc:MGI:1355330]
ENSMUSG00000029032	-1.74825	2.06138	12.3312	0.000445448	0.0430518	chr4	-	154300054	154278486	NM_001112744	Arhgef16	Rho guanine nucleotide exchange factor (GEF) 16 [Source:MGI Symbol;Acc:MGI:2446219]
ENSMUSG00000024376	1.49896	2.2534	12.3032	0.000452194	0.0431112	chr18	-	34007206	33796327	NM_013512	Epb4.1l4a	erythrocyte protein band 4.1 like 4a [Source:MGI Symbol;Acc:MGI:103007]
ENSMUSG00000078612	-1.61236	0.184318	12.2878	0.000455919	0.0431112	chr4	+	104913456	105016863	NM_001162980	1700024P16Rik	RIKEN cDNA 1700024P16 gene [Source:MGI Symbol;Acc:MGI:2685466]
ENSMUSG00000041028	-0.51903	8.4948	12.2854	0.000456517	0.0431112	chr14	-	37135139	37120444	NM_001199122	Ghitm	growth hormone inducible transmembrane protein [Source:MGI Symbol;Acc:MGI:1913342]
ENSMUSG00000053460	-0.539844	5.25661	12.2609	0.000462538	0.0433489	chr6	+	72414308	72430712	NM_019802	Ggcx	gamma-glutamyl carboxylase [Source:MGI Symbol;Acc:MGI:1927655]
ENSMUSG00000061576	-0.878776	5.25195	12.2239	0.000471818	0.0438014	chr5	+	26817357	27726460	NM_010075	Dpp6	dipeptidylpeptidase 6 [Source:MGI Symbol;Acc:MGI:94921]
ENSMUSG00000070639	0.542105	5.24949	12.2135	0.000474447	0.0438014	chr5	+	105415775	105490074	NM_001033550	Lrrc8b	leucine rich repeat containing 8 family, member B [Source:MGI Symbol;Acc:MGI:2141353]
ENSMUSG00000001143	-0.494763	4.89861	12.1811	0.000482758	0.0439771	chr1	-	36445271	36422065	NM_001013374	Lman2l	lectin, mannose-binding 2-like [Source:MGI Symbol;Acc:MGI:2443010]
ENSMUSG00000057948	-0.919292	3.71539	12.1784	0.00048346	0.0439771	chr11	-	116077961	116062096	NM_001009573	Unc13d	unc-13 homolog D (C. elegans) [Source:MGI Symbol;Acc:MGI:1917700]
ENSMUSG00000027199	-0.744539	7.60868	12.15	0.000490871	0.0440837	chr2	-	122611303	122594467	NM_025961	Gatm	glycine amidinotransferase (L-arginine:glycine amidinotransferase) [Source:MGI Symbol;Acc:MGI:1914342]
ENSMUSG00000023046	-0.630921	4.36285	12.1231	0.000498022	0.0440837	chr15	+	102144362	102149511	NM_008344	Igfbp6	insulin-like growth factor binding protein 6 [Source:MGI Symbol;Acc:MGI:96441]
ENSMUSG00000021583	0.74466	3.47536	12.1217	0.00049838	0.0440837	chr13	+	74639872	74691875	NM_030711	Erap1	endoplasmic reticulum aminopeptidase 1 [Source:MGI Symbol;Acc:MGI:1933403]
ENSMUSG00000051159	1.49293	2.00478	12.1147	0.000500251	0.0440837	chrX	-	102252181	102247381	NM_001276473	Cited1	Cbp/p300-interacting transactivator with Glu/Asp-rich carboxy-terminal domain 1 [Source:MGI Symbol;Acc:MGI:108023]
ENSMUSG00000032135	-0.789477	3.79736	12.0995	0.00050434	0.0440837	chr9	+	44134562	44142727	NM_023061	Mcam	melanoma cell adhesion molecule [Source:MGI Symbol;Acc:MGI:1933966]
ENSMUSG00000050777	-0.894904	5.13715	12.0934	0.000506013	0.0440837	chr1	-	120074074	120067377	NM_019432	Tmem37	transmembrane protein 37 [Source:MGI Symbol;Acc:MGI:2157899]
ENSMUSG00000003865	-0.537676	7.57138	12.0722	0.000511804	0.0442764	chr7	+	45434844	45456619	NM_030678	Gys1	glycogen synthase 1, muscle [Source:MGI Symbol;Acc:MGI:101805]
ENSMUSG00000044350	-0.862691	4.82602	12.017	0.000527162	0.0450092	chr14	-	77036641	77024200	NM_172488	Lacc1	laccase (multicopper oxidoreductase) domain containing 1 [Source:MGI Symbol;Acc:MGI:2445077]
ENSMUSG00000038623	-0.882876	6.91834	12.0157	0.000527551	0.0450092	chr7	+	81859001	81884071	NM_145375	Tm6sf1	transmembrane 6 superfamily member 1 [Source:MGI Symbol;Acc:MGI:1933209]
ENSMUSG00000015217	0.715223	4.94012	12.0009	0.000531751	0.0450568	chrX	+	71555918	71560676	NM_001293625	Hmgb3	high mobility group box 3 [Source:MGI Symbol;Acc:MGI:1098219]
ENSMUSG00000040711	0.650953	6.68329	11.8995	0.000561497	0.0469802	chr11	+	32347820	32428173	NM_177364	Sh3pxd2b	SH3 and PX domains 2B [Source:MGI Symbol;Acc:MGI:2442062]
ENSMUSG00000052852	-0.685804	7.56289	11.8977	0.000562046	0.0469802	chr6	+	71707561	71810710	NM_178608	Reep1	receptor accessory protein 1 [Source:MGI Symbol;Acc:MGI:1098827]
ENSMUSG00000005413	-0.807535	6.63493	11.8647	0.000572076	0.0473805	chr8	+	75093591	75100596	NM_010442	Hmox1	heme oxygenase 1 [Source:MGI Symbol;Acc:MGI:96163]
ENSMUSG00000024647	1.98845	-0.176657	11.8569	0.000574495	0.0473805	chr18	+	86711110	86718283	NM_001302356	Cbln2	cerebellin 2 precursor protein [Source:MGI Symbol;Acc:MGI:88282]
ENSMUSG00000034205	-1.19248	3.68956	11.8393	0.000579933	0.0475123	chr14	+	69609478	69693698	NM_033325	Loxl2	lysyl oxidase-like 2 [Source:MGI Symbol;Acc:MGI:2137913]
ENSMUSG00000041607	1.51904	2.25678	11.7254	0.000616531	0.0497977	chr18	+	82475146	82558703	NM_001025245	Mbp	myelin basic protein [Source:MGI Symbol;Acc:MGI:96925]
ENSMUSG00000039257	-1.43204	1.9128	11.7165	0.000619476	0.0497977	chr7	+	40899215	40930594	NM_021387	Vstm2b	V-set and transmembrane domain containing 2B [Source:MGI Symbol;Acc:MGI:1914525]
ENSMUSG00000020717	-2.2533	0.596471	11.7096	0.000621791	0.0497977	chr11	-	106715265	106654217	NM_001032378	Pecam1	platelet/endothelial cell adhesion molecule 1 [Source:MGI Symbol;Acc:MGI:97537]
ENSMUSG00000056888	-1.08749	1.98582	11.7032	0.00062393	0.0497977	chr10	-	111997264	111985448	NM_028608	Glipr1	GLI pathogenesis-related 1 (glioma) [Source:MGI Symbol;Acc:MGI:1920940]
ENSMUSG00000061461	-0.66811	5.36656	11.6525	0.000641166	0.0508081	chr5	+	53267106	53278539	NM_001145433	Smim20	small integral membrane protein 20 [Source:MGI Symbol;Acc:MGI:1913528]
ENSMUSG00000042918	-0.518108	5.67635	11.634	0.000647567	0.0508081	chr7	+	45639993	45645211	NM_172418	Mamstr	MEF2 activating motif and SAP domain containing transcriptional regulator [Source:MGI Symbol;Acc:MGI:1921740]
ENSMUSG00000022244	-0.473095	5.32461	11.6302	0.000648912	0.0508081	chr15	+	10981756	10996624	NM_008537	Amacr	alpha-methylacyl-CoA racemase [Source:MGI Symbol;Acc:MGI:1098273]
ENSMUSG00000018648	-0.607051	5.78883	11.6127	0.000655015	0.050835	chr11	-	84068357	84048041	NM_019819	Dusp14	dual specificity phosphatase 14 [Source:MGI Symbol;Acc:MGI:1927168]
ENSMUSG00000020181	1.06374	5.49414	11.6023	0.000658704	0.050835	chr10	-	110000219	109682660	NM_001081035	Nav3	neuron navigator 3 [Source:MGI Symbol;Acc:MGI:2183703]
ENSMUSG00000032786	-0.395984	6.04798	11.5833	0.000665466	0.050835	chr9	-	106247730	106233455	NM_001291835	Alas1	aminolevulinic acid synthase 1 [Source:MGI Symbol;Acc:MGI:87989]
ENSMUSG00000051243	-1.16864	0.225177	11.5827	0.000665692	0.050835	chr9	-	58204319	58196298	NM_001161541	Islr2	immunoglobulin superfamily containing leucine-rich repeat 2 [Source:MGI Symbol;Acc:MGI:2444277]
ENSMUSG00000042254	2.13717	1.54701	11.5695	0.000670418	0.0508819	chr9	+	65265180	65280605	NM_173385	Cilp	cartilage intermediate layer protein, nucleotide pyrophosphohydrolase [Source:MGI Symbol;Acc:MGI:2444507]
ENSMUSG00000038508	-1.33915	3.11724	11.5475	0.000678389	0.0511729	chr8	-	70632095	70629393	NM_011819	Gdf15	growth differentiation factor 15 [Source:MGI Symbol;Acc:MGI:1346047]
ENSMUSG00000029864	-1.02503	1.27915	11.5005	0.000695777	0.0521664	chr6	+	42245935	42250441	NM_029555	Gstk1	glutathione S-transferase kappa 1 [Source:MGI Symbol;Acc:MGI:1923513]
ENSMUSG00000024587	-0.42383	8.96374	11.4379	0.000719604	0.0536278	chr18	-	64516557	64499665	NM_027350	Nars	asparaginyl-tRNA synthetase [Source:MGI Symbol;Acc:MGI:1917473]
ENSMUSG00000026840	-1.49498	-0.112206	11.4216	0.000725932	0.0536705	chr2	+	31887344	31946539	NM_011836	Lamc3	laminin gamma 3 [Source:MGI Symbol;Acc:MGI:1344394]
ENSMUSG00000017837	-0.470105	6.12639	11.4073	0.000731573	0.0536705	chr11	+	100622876	100627607	NM_028024	Nkiras2	NFKB inhibitor interacting Ras-like protein 2 [Source:MGI Symbol;Acc:MGI:1919216]
ENSMUSG00000015134	-1.57101	0.957863	11.4032	0.000733192	0.0536705	chr7	-	66427517	66390892	NM_053080	Aldh1a3	aldehyde dehydrogenase family 1, subfamily A3 [Source:MGI Symbol;Acc:MGI:1861722]
ENSMUSG00000026565	0.448112	5.2464	11.3425	0.000757526	0.0549637	chr1	-	166002678	165865154	NM_011137	Pou2f1	POU domain, class 2, transcription factor 1 [Source:MGI Symbol;Acc:MGI:101898]
ENSMUSG00000035168	0.493583	6.74412	11.3322	0.000761734	0.0549637	chr2	+	59612042	59845717	NM_001290659	Tanc1	tetratricopeptide repeat, ankyrin repeat and coiled-coil containing 1 [Source:MGI Symbol;Acc:MGI:1914110]
ENSMUSG00000027858	0.726769	3.08696	11.3263	0.000764187	0.0549637	chr3	+	102734529	102772292	NM_027533	Tspan2	tetraspanin 2 [Source:MGI Symbol;Acc:MGI:1917997]
ENSMUSG00000068748	1.41852	-0.0419365	11.3084	0.000771563	0.0551735	chr6	+	22875502	23052916	NM_001081306	Ptprz1	protein tyrosine phosphatase, receptor type Z, polypeptide 1 [Source:MGI Symbol;Acc:MGI:97816]
ENSMUSG00000035642	-0.625672	6.37977	11.2781	0.00078426	0.0553287	chr7	-	97579496	97550340	NM_001177945	Aamdc	adipogenesis associated Mth938 domain containing [Source:MGI Symbol;Acc:MGI:1913523]
ENSMUSG00000079523	-0.750089	10.5542	11.2767	0.00078488	0.0553287	chr6	-	72958488	72957347	NM_025284	Tmsb10	thymosin, beta 10 [Source:MGI Symbol;Acc:MGI:109146]
ENSMUSG00000031990	-0.521398	7.06565	11.2657	0.000789504	0.0553287	chr9	-	27155421	27097385	NM_023277	Jam3	junction adhesion molecule 3 [Source:MGI Symbol;Acc:MGI:1933825]
ENSMUSG00000048373	-0.844752	5.86702	11.255	0.0007941	0.0553287	chr5	-	43981779	43978858	NM_001271616	Fgfbp1	fibroblast growth factor binding protein 1 [Source:MGI Symbol;Acc:MGI:1096350]
ENSMUSG00000002007	-0.68276	6.14689	11.241	0.00080012	0.0553287	chrX	+	73774405	73778925	NM_019684	Srpk3	serine/arginine-rich protein specific kinase 3 [Source:MGI Symbol;Acc:MGI:1891338]
ENSMUSG00000045136	-0.556289	7.78455	11.2399	0.00080057	0.0553287	chr13	-	34130354	34127008	NM_023716	Tubb2b	tubulin, beta 2B class IIB [Source:MGI Symbol;Acc:MGI:1920960]
ENSMUSG00000046794	-0.605438	3.11616	11.1714	0.000830687	0.0570912	chr8	+	35375741	35388124	NM_177741	Ppp1r3b	protein phosphatase 1, regulatory (inhibitor) subunit 3B [Source:MGI Symbol;Acc:MGI:2177268]
ENSMUSG00000034438	-1.20353	2.45122	11.1438	0.000843122	0.0573493	chr5	-	105139540	105014153	NM_029509	Gbp8	guanylate-binding protein 8 [Source:MGI Symbol;Acc:MGI:1923324]
ENSMUSG00000025492	0.650953	5.51413	11.1403	0.000844737	0.0573493	chr7	-	141010770	141009586	NM_025378	Ifitm3	interferon induced transmembrane protein 3 [Source:MGI Symbol;Acc:MGI:1913391]
ENSMUSG00000027985	1.00012	3.47017	11.1324	0.000848349	0.0573493	chr3	+	131110471	131224356	NM_010703	Lef1	lymphoid enhancer binding factor 1 [Source:MGI Symbol;Acc:MGI:96770]
ENSMUSG00000020182	-0.751703	5.26981	11.1207	0.000853685	0.0573964	chr11	-	11890408	11814103	NM_016672	Ddc	dopa decarboxylase [Source:MGI Symbol;Acc:MGI:94876]
ENSMUSG00000035873	0.948948	1.20129	11.0991	0.00086369	0.0577552	chr10	+	108332189	108414391	NM_054056	Pawr	PRKC, apoptosis, WT1, regulator [Source:MGI Symbol;Acc:MGI:2149961]
ENSMUSG00000041649	0.767528	2.28797	11.0783	0.000873432	0.0580926	chrX	+	153237748	153396132	NM_173780	Klf8	Kruppel-like factor 8 [Source:MGI Symbol;Acc:MGI:2442430]
ENSMUSG00000040363	0.369369	6.19038	11.0665	0.000879007	0.0581508	chrX	-	12080553	12036740	NM_029510	Bcor	BCL6 interacting corepressor [Source:MGI Symbol;Acc:MGI:1918708]
ENSMUSG00000036523	1.25355	0.95466	11.0517	0.000886065	0.0583059	chr12	-	16800684	16670615	NM_015764	Greb1	gene regulated by estrogen in breast cancer protein [Source:MGI Symbol;Acc:MGI:2149712]
ENSMUSG00000032076	0.504624	5.45784	10.999	0.000911634	0.0594445	chr9	+	47530173	47853385	NM_207676	Cadm1	cell adhesion molecule 1 [Source:MGI Symbol;Acc:MGI:1889272]
ENSMUSG00000028214	1.07922	2.63122	10.972	0.000925009	0.0594445	chr4	+	11704457	11714752	NM_010276	Gem	GTP binding protein (gene overexpressed in skeletal muscle) [Source:MGI Symbol;Acc:MGI:99844]
ENSMUSG00000021277	0.448278	6.28859	10.9711	0.000925426	0.0594445	chr12	+	111166370	111267153	NM_001286122	Traf3	TNF receptor-associated factor 3 [Source:MGI Symbol;Acc:MGI:108041]
ENSMUSG00000023018	0.519386	4.0632	10.9613	0.000930364	0.0594445	chr15	+	99702287	99713995	NM_031842	Smarcd1	SWI/SNF related, matrix associated, actin dependent regulator of chromatin, subfamily d, member 1 [Source:MGI Symbol;Acc:MGI:1933623]
ENSMUSG00000040021	0.477221	5.95836	10.9592	0.000931413	0.0594445	chr10	+	7681209	7716458	NM_010690	Lats1	large tumor suppressor [Source:MGI Symbol;Acc:MGI:1333883]
ENSMUSG00000045404	-0.983135	5.35763	10.9576	0.000932199	0.0594445	chr12	+	99964499	100062682	NM_146037	Kcnk13	potassium channel, subfamily K, member 13 [Source:MGI Symbol;Acc:MGI:2384976]
ENSMUSG00000026069	-3.12952	3.59623	10.9432	0.00093946	0.0596003	chr1	+	40429570	40446723	NM_001294171	Il1rl1	interleukin 1 receptor-like 1 [Source:MGI Symbol;Acc:MGI:98427]
ENSMUSG00000027381	0.580775	3.89755	10.8822	0.000970932	0.0612827	chr2	+	128126039	128162547	NM_207680	Bcl2l11	BCL2-like 11 (apoptosis facilitator) [Source:MGI Symbol;Acc:MGI:1197519]
ENSMUSG00000044461	-0.558196	7.77466	10.8644	0.000980297	0.0613188	chr14	+	59625281	59631658	NM_145463	Shisa2	shisa family member 2 [Source:MGI Symbol;Acc:MGI:2444716]
ENSMUSG00000042515	-0.507711	6.87157	10.8588	0.000983278	0.0613188	chrX	+	139210042	139238333	NM_001164630	Mum1l1	melanoma associated antigen (mutated) 1-like 1 [Source:MGI Symbol;Acc:MGI:2445062]
ENSMUSG00000027238	-1.12006	0.692794	10.8447	0.000990772	0.0613188	chr2	-	121807087	121545529	NM_172673	Frmd5	FERM domain containing 5 [Source:MGI Symbol;Acc:MGI:2442557]
ENSMUSG00000052062	0.789173	2.20368	10.8437	0.000991332	0.0613188	chr1	+	61638824	62642284	NM_001081050	Pard3b	par-3 family cell polarity regulator beta [Source:MGI Symbol;Acc:MGI:1919301]
ENSMUSG00000053101	-2.27482	0.184282	10.7918	0.00101952	0.06248	chr13	-	19824257	19749682	NM_181754	Gpr141	G protein-coupled receptor 141 [Source:MGI Symbol;Acc:MGI:2672983]
ENSMUSG00000028132	1.19957	1.28588	10.785	0.00102324	0.06248	chr3	-	121263340	121202008	NM_178936	Tmem56	transmembrane protein 56 [Source:MGI Symbol;Acc:MGI:1923195]
ENSMUSG00000061859	-0.684701	7.92473	10.7814	0.00102526	0.06248	chr4	+	98546734	98719603	NM_007704	Inadl	InaD-like (Drosophila) [Source:MGI Symbol;Acc:MGI:1277960]
ENSMUSG00000034674	0.350153	5.53916	10.7472	0.00104438	0.0631802	chr10	+	82629828	82650324	NM_011561	Tdg	thymine DNA glycosylase [Source:MGI Symbol;Acc:MGI:108247]
ENSMUSG00000027630	-0.508972	7.45985	10.7317	0.00105318	0.0631802	chr3	+	22076727	22212751	NM_030732	Tbl1xr1	transducin (beta)-like 1X-linked receptor 1 [Source:MGI Symbol;Acc:MGI:2441730]
ENSMUSG00000027827	-1.09131	0.446206	10.7282	0.00105517	0.0631802	chr3	+	65109384	65378219	NM_010597	Kcnab1	potassium voltage-gated channel, shaker-related subfamily, beta member 1 [Source:MGI Symbol;Acc:MGI:109155]
ENSMUSG00000028229	-0.720276	2.75183	10.7211	0.0010592	0.0631802	chr4	+	19575207	19606932	NM_025476	Rmdn1	regulator of microtubule dynamics 1 [Source:MGI Symbol;Acc:MGI:1913552]
ENSMUSG00000020303	-0.840552	6.07641	10.7157	0.00106228	0.0631802	chr11	-	31370074	31357307	NM_011491	Stc2	stanniocalcin 2 [Source:MGI Symbol;Acc:MGI:1316731]
ENSMUSG00000056091	-0.675427	5.25862	10.6929	0.00107546	0.0634238	chr6	+	72097592	72154571	NM_001035228	St3gal5	ST3 beta-galactoside alpha-2,3-sialyltransferase 5 [Source:MGI Symbol;Acc:MGI:1339963]
ENSMUSG00000041911	1.00853	2.87685	10.6875	0.00107863	0.0634238	chr2	+	71528113	71533980	NM_010053	Dlx1	distal-less homeobox 1 [Source:MGI Symbol;Acc:MGI:94901]
ENSMUSG00000025417	0.45569	5.11727	10.6821	0.00108176	0.0634238	chr10	-	127211622	127197067	NM_054097	Pip4k2c	phosphatidylinositol-5-phosphate 4-kinase, type II, gamma [Source:MGI Symbol;Acc:MGI:2152214]
ENSMUSG00000004098	-1.04135	3.70228	10.6592	0.00109526	0.0639127	chr9	-	20815067	20770050	NM_016919	Col5a3	collagen, type V, alpha 3 [Source:MGI Symbol;Acc:MGI:1858212]
ENSMUSG00000037032	-0.511933	6.13577	10.6136	0.00112259	0.064664	chr7	-	105581653	105558483	NM_009685	Apbb1	amyloid beta (A4) precursor protein-binding, family B, member 1 [Source:MGI Symbol;Acc:MGI:107765]
ENSMUSG00000020063	0.435976	4.91202	10.6104	0.00112451	0.064664	chr10	-	63339035	63319058	NM_001159589	Sirt1	sirtuin 1 [Source:MGI Symbol;Acc:MGI:2135607]
ENSMUSG00000009894	-0.429156	6.71777	10.6093	0.00112522	0.064664	chr11	-	59449999	59407134	NM_144521	Snap47	synaptosomal-associated protein, 47 [Source:MGI Symbol;Acc:MGI:1915076]
ENSMUSG00000031548	1.10164	0.958213	10.6005	0.00113059	0.064664	chr8	+	23411502	23449632	NM_013834	Sfrp1	secreted frizzled-related protein 1 [Source:MGI Symbol;Acc:MGI:892014]
ENSMUSG00000038909	0.366793	6.11074	10.5945	0.00113427	0.064664	chr11	-	95310201	95274259	NM_177619	Kat7	K(lysine) acetyltransferase 7 [Source:MGI Symbol;Acc:MGI:2182799]
ENSMUSG00000024892	-0.657006	5.1403	10.5559	0.00115817	0.0657235	chr19	+	4510472	4621752	NM_001162946	Pcx	pyruvate carboxylase [Source:MGI Symbol;Acc:MGI:97520]
ENSMUSG00000031709	0.760197	4.04616	10.5429	0.00116637	0.0658868	chr8	+	83165352	83272422	NM_027758	Tbc1d9	TBC1 domain family, member 9 [Source:MGI Symbol;Acc:MGI:1918560]
ENSMUSG00000028158	-0.757408	5.34155	10.5329	0.00117271	0.0659316	chr3	-	138131377	138089854	NM_008642	Mttp	microsomal triglyceride transfer protein [Source:MGI Symbol;Acc:MGI:106926]
ENSMUSG00000019256	0.913757	2.76451	10.5167	0.00118302	0.0659316	chr12	-	35535038	35497974	NM_013464	Ahr	aryl-hydrocarbon receptor [Source:MGI Symbol;Acc:MGI:105043]
ENSMUSG00000048120	-0.940389	1.76852	10.5165	0.00118316	0.0659316	chr19	+	40659770	40741602	NM_001304721	Entpd1	ectonucleoside triphosphate diphosphohydrolase 1 [Source:MGI Symbol;Acc:MGI:102805]
ENSMUSG00000058624	1.46099	1.22277	10.4987	0.00119461	0.0662712	chr19	-	21472672	21391307	NM_010266	Gda	guanine deaminase [Source:MGI Symbol;Acc:MGI:95678]
ENSMUSG00000028217	1.19066	1.35013	10.4826	0.00120505	0.066552	chr4	+	11758147	11817895	NM_019753	Cdh17	cadherin 17 [Source:MGI Symbol;Acc:MGI:1095414]
ENSMUSG00000031872	1.20436	1.66843	10.4564	0.00122225	0.0666199	chr8	+	104170513	104219092	NM_001141922	Bean1	brain expressed, associated with Nedd4, 1 [Source:MGI Symbol;Acc:MGI:1929597]
ENSMUSG00000024661	-0.663151	9.10161	10.4563	0.00122235	0.0666199	chr19	+	9982703	9985092	NM_010239	Fth1	ferritin heavy chain 1 [Source:MGI Symbol;Acc:MGI:95588]
ENSMUSG00000003269	0.361384	6.2139	10.4543	0.00122365	0.0666199	chr7	-	45814311	45806639	NM_001112701	Cyth2	cytohesin 2 [Source:MGI Symbol;Acc:MGI:1334255]
ENSMUSG00000004748	-1.00972	1.88876	10.448	0.00122782	0.0666199	chr11	-	4095445	4091480	NM_026443	Mtfp1	mitochondrial fission process 1 [Source:MGI Symbol;Acc:MGI:1916686]
ENSMUSG00000022193	-0.417091	6.68321	10.4184	0.00124764	0.0674	chr14	-	54617995	54614120	NM_011186	Psmb5	proteasome (prosome, macropain) subunit, beta type 5 [Source:MGI Symbol;Acc:MGI:1194513]
ENSMUSG00000030979	-0.509782	4.96754	10.4091	0.00125394	0.0674458	chr7	-	133709069	133686356	NM_001302087	Uros	uroporphyrinogen III synthase [Source:MGI Symbol;Acc:MGI:98917]
ENSMUSG00000074743	-1.05472	5.85624	10.3867	0.00126927	0.0679745	chr2	-	148408188	148404466	NM_009378	Thbd	thrombomodulin [Source:MGI Symbol;Acc:MGI:98736]
ENSMUSG00000017978	1.06339	1.04351	10.3591	0.00128841	0.0684901	chr6	-	23839420	23262773	NM_001252106	Cadps2	Ca2+-dependent activator protein for secretion 2 [Source:MGI Symbol;Acc:MGI:2443963]
ENSMUSG00000049630	2.31827	3.29876	10.3568	0.00128997	0.0684901	chr2	-	13011806	13003457	NM_153155	C1ql3	C1q-like 3 [Source:MGI Symbol;Acc:MGI:2387350]
ENSMUSG00000050822	0.880724	1.83334	10.3313	0.00130795	0.0687716	chr5	+	142702101	142722490	NM_146257	Slc29a4	solute carrier family 29 (nucleoside transporters), member 4 [Source:MGI Symbol;Acc:MGI:2385330]
ENSMUSG00000033684	-0.426516	6.60958	10.3286	0.00130982	0.0687716	chr1	-	155812889	155778158	NM_001024945	Qsox1	quiescin Q6 sulfhydryl oxidase 1 [Source:MGI Symbol;Acc:MGI:1330818]
ENSMUSG00000038481	0.61038	3.84218	10.3256	0.00131195	0.0687716	chr10	+	40349308	40483818	NM_001291817	Cdk19	cyclin-dependent kinase 19 [Source:MGI Symbol;Acc:MGI:1925584]
ENSMUSG00000024812	0.84017	4.94698	10.3118	0.00132181	0.068871	chr19	-	24225026	24094523	NM_001198985	Tjp2	tight junction protein 2 [Source:MGI Symbol;Acc:MGI:1341872]
ENSMUSG00000024924	-1.05653	5.79575	10.3074	0.00132498	0.068871	chr19	+	27217020	27249862	NM_001161420	Vldlr	very low density lipoprotein receptor [Source:MGI Symbol;Acc:MGI:98935]
ENSMUSG00000001506	-2.07004	4.47305	10.2551	0.00136307	0.0700988	chr11	+	94936224	94953042	NM_007742	Col1a1	collagen, type I, alpha 1 [Source:MGI Symbol;Acc:MGI:88467]
ENSMUSG00000028082	0.709476	4.57403	10.2546	0.00136343	0.0700988	chr3	+	86084434	86130522	NM_001082414	Sh3d19	SH3 domain protein D19 [Source:MGI Symbol;Acc:MGI:1350923]
ENSMUSG00000060477	-0.42605	3.97267	10.2517	0.0013656	0.0700988	chr6	+	113638467	113695009	NM_172161	Irak2	interleukin-1 receptor-associated kinase 2 [Source:MGI Symbol;Acc:MGI:2429603]
ENSMUSG00000024070	0.506766	6.42798	10.2372	0.00137637	0.0702967	chr17	-	79020816	78950549	NM_001171004	Prkd3	protein kinase D3 [Source:MGI Symbol;Acc:MGI:1922542]
ENSMUSG00000001985	1.0157	4.20629	10.2312	0.00138082	0.0702967	chr4	+	125490700	125714173	NM_001081097	Grik3	glutamate receptor, ionotropic, kainate 3 [Source:MGI Symbol;Acc:MGI:95816]
ENSMUSG00000029771	1.03119	0.195394	10.1915	0.00141089	0.0715281	chr6	+	29526625	29537319	NM_012057	Irf5	interferon regulatory factor 5 [Source:MGI Symbol;Acc:MGI:1350924]
ENSMUSG00000045659	-0.794089	4.27092	10.1816	0.00141847	0.0715281	chr7	-	116237776	116123493	NM_001305186	Plekha7	pleckstrin homology domain containing, family A member 7 [Source:MGI Symbol;Acc:MGI:2445094]
ENSMUSG00000056271	-0.671211	4.18315	10.1723	0.00142569	0.0715281	chr9	-	57620774	57607085	NM_199222	Lman1l	lectin, mannose-binding 1 like [Source:MGI Symbol;Acc:MGI:2667537]
ENSMUSG00000031880	1.07702	4.84209	10.1691	0.00142813	0.0715281	chr8	-	104631321	104628066	NM_019662	Rrad	Ras-related associated with diabetes [Source:MGI Symbol;Acc:MGI:1930943]
ENSMUSG00000045326	-0.921975	2.05393	10.1164	0.00146955	0.0729911	chr3	-	108890008	108855323	NM_177091	Fndc7	fibronectin type III domain containing 7 [Source:MGI Symbol;Acc:MGI:2443535]
ENSMUSG00000024087	-2.5607	1.20433	10.1076	0.00147656	0.0729911	chr17	-	79715041	79706953	NM_009994	Cyp1b1	cytochrome P450, family 1, subfamily b, polypeptide 1 [Source:MGI Symbol;Acc:MGI:88590]
ENSMUSG00000078815	-0.705395	6.05577	10.1043	0.0014792	0.0729911	chr7	+	3424195	3435667	NM_133183	Cacng6	calcium channel, voltage-dependent, gamma subunit 6 [Source:MGI Symbol;Acc:MGI:1859168]
ENSMUSG00000027367	-0.387687	7.57359	10.1022	0.00148094	0.0729911	chr2	+	127270229	127298932	NM_139308	Stard7	START domain containing 7 [Source:MGI Symbol;Acc:MGI:2139090]
ENSMUSG00000066842	0.911321	0.445106	10.0763	0.00150188	0.0737294	chr1	-	150993051	150562524	NM_001024720	Hmcn1	hemicentin 1 [Source:MGI Symbol;Acc:MGI:2685047]
ENSMUSG00000028597	-0.730043	3.48182	9.99797	0.00156713	0.0766228	chr4	-	108406961	108400390	NM_024198	Gpx7	glutathione peroxidase 7 [Source:MGI Symbol;Acc:MGI:1914555]
ENSMUSG00000037016	1.38548	6.61785	9.99019	0.00157376	0.0766228	chr3	-	53657355	53513938	NM_172862	Frem2	Fras1 related extracellular matrix protein 2 [Source:MGI Symbol;Acc:MGI:2444465]
ENSMUSG00000031012	0.432973	4.96239	9.9836	0.0015794	0.0766228	chrX	-	13846578	13517080	NM_001284503	Cask	calcium/calmodulin-dependent serine protein kinase (MAGUK family) [Source:MGI Symbol;Acc:MGI:1309489]
ENSMUSG00000023175	-0.493066	8.83504	9.95577	0.00160346	0.0774859	chr10	+	79704491	79711969	NM_001077184	Bsg	basigin [Source:MGI Symbol;Acc:MGI:88208]
ENSMUSG00000040147	-1.06337	0.675613	9.91814	0.00163657	0.0787784	chrX	-	16817366	16709282	NM_172778	Maob	monoamine oxidase B [Source:MGI Symbol;Acc:MGI:96916]
ENSMUSG00000038271	-0.519264	7.39361	9.87998	0.00167087	0.0799456	chr6	+	125145244	125161774	NM_001039669	Iffo1	intermediate filament family orphan 1 [Source:MGI Symbol;Acc:MGI:2444516]
ENSMUSG00000060519	-0.560987	5.93709	9.87681	0.00167375	0.0799456	chr1	-	156674356	156653617	NM_023141	Tor3a	torsin family 3, member A [Source:MGI Symbol;Acc:MGI:1353652]
ENSMUSG00000092083	1.71165	-0.283977	9.85804	0.00169091	0.0804548	chr1	+	15312452	15723750	NM_001098528	Kcnb2	potassium voltage gated channel, Shab-related subfamily, member 2 [Source:MGI Symbol;Acc:MGI:99632]
ENSMUSG00000068739	-0.441781	7.91575	9.83997	0.0017076	0.0809376	chr3	-	108445198	108424865	NM_001204979	Sars	seryl-aminoacyl-tRNA synthetase [Source:MGI Symbol;Acc:MGI:102809]
ENSMUSG00000019139	-0.76642	6.38985	9.79779	0.00174721	0.0824991	chr8	+	70594481	70597288	NM_023627	Isyna1	myo-inositol 1-phosphate synthase A1 [Source:MGI Symbol;Acc:MGI:1919030]
ENSMUSG00000001504	0.74084	3.27189	9.78564	0.0017588	0.0826051	chr13	+	72628820	72634198	NM_010574	Irx2	Iroquois related homeobox 2 (Drosophila) [Source:MGI Symbol;Acc:MGI:1197526]
ENSMUSG00000074884	-0.51191	8.57935	9.78145	0.00176281	0.0826051	chr2	+	121449195	121453420	NM_011354	Serf2	small EDRK-rich factor 2 [Source:MGI Symbol;Acc:MGI:1337041]
ENSMUSG00000024953	-0.413706	6.92765	9.73018	0.00181267	0.0837924	chr19	-	6910106	6906706	NM_012021	Prdx5	peroxiredoxin 5 [Source:MGI Symbol;Acc:MGI:1859821]
ENSMUSG00000001763	-0.816577	5.22642	9.72161	0.00182114	0.0837924	chr6	+	29694222	29718559	NM_146173	Tspan33	tetraspanin 33 [Source:MGI Symbol;Acc:MGI:1919012]
ENSMUSG00000000120	1.30055	0.23753	9.713	0.00182969	0.0837924	chr11	-	95587735	95568818	NM_033217	Ngfr	nerve growth factor receptor (TNFR superfamily, member 16) [Source:MGI Symbol;Acc:MGI:97323]
ENSMUSG00000047139	0.675434	5.74349	9.71288	0.00182981	0.0837924	chr10	+	43579169	43584262	NM_009846	Cd24a	CD24a antigen [Source:MGI Symbol;Acc:MGI:88323]
ENSMUSG00000015981	1.04837	0.347347	9.71064	0.00183204	0.0837924	chr7	-	139188517	139103638	NM_021302	Stk32c	serine/threonine kinase 32C [Source:MGI Symbol;Acc:MGI:2385336]
ENSMUSG00000024395	-1.28534	0.0618262	9.71028	0.0018324	0.0837924	chr18	+	31931507	31958619	NM_144862	Lims2	LIM and senescent cell antigen like domains 2 [Source:MGI Symbol;Acc:MGI:2385067]
ENSMUSG00000035314	1.11839	3.4094	9.69861	0.00184407	0.0837924	chr7	+	99381549	99460983	NM_201352	Gdpd5	glycerophosphodiester phosphodiesterase domain containing 5 [Source:MGI Symbol;Acc:MGI:2686926]
ENSMUSG00000022075	-0.616837	5.2331	9.6866	0.00185616	0.0837924	chr14	-	69805530	69784990	NM_153514	Rhobtb2	Rho-related BTB domain containing 2 [Source:MGI Symbol;Acc:MGI:2180557]
ENSMUSG00000028420	-0.569147	5.60309	9.68401	0.00185878	0.0837924	chr4	+	53826045	53862019	NM_028053	Tmem38b	transmembrane protein 38B [Source:MGI Symbol;Acc:MGI:1098718]
ENSMUSG00000044167	0.448851	4.80133	9.67786	0.00186502	0.0837924	chr3	+	52268336	52353221	NM_019739	Foxo1	forkhead box O1 [Source:MGI Symbol;Acc:MGI:1890077]
ENSMUSG00000046269	0.601318	3.26208	9.67616	0.00186675	0.0837924	chrX	-	7375830	7372591	NM_019461	Usp27x	ubiquitin specific peptidase 27, X chromosome [Source:MGI Symbol;Acc:MGI:1859645]
ENSMUSG00000035615	0.475971	5.62138	9.67352	0.00186943	0.0837924	chr4	+	45184906	45285936	NM_001081172	Frmpd1	FERM and PDZ domain containing 1 [Source:MGI Symbol;Acc:MGI:2446274]
ENSMUSG00000031906	1.09323	0.283986	9.64248	0.00190128	0.0849124	chr8	-	106337988	106252548	NM_021491	Smpd3	sphingomyelin phosphodiesterase 3, neutral [Source:MGI Symbol;Acc:MGI:1927578]
ENSMUSG00000035493	2.11034	1.1241	9.63285	0.00191128	0.0850173	chr13	+	56609603	56639339	NM_009369	Tgfbi	transforming growth factor, beta induced [Source:MGI Symbol;Acc:MGI:99959]
ENSMUSG00000101746	-0.870518	2.62772	9.61547	0.00192945	0.0850173	chr1	-	177642943	177641542	NR_037994	2310043L19Rik	RIKEN cDNA 2310043L19 gene [Source:MGI Symbol;Acc:MGI:1922839]
ENSMUSG00000063450	0.968604	5.09005	9.61473	0.00193023	0.0850173	chr12	+	75818318	76110900	NM_001005510	Syne2	spectrin repeat containing, nuclear envelope 2 [Source:MGI Symbol;Acc:MGI:2449316]
ENSMUSG00000024308	0.525875	4.22633	9.61078	0.00193438	0.0850173	chr17	+	33919332	33929288	NM_001025313	Tapbp	TAP binding protein [Source:MGI Symbol;Acc:MGI:1201689]
ENSMUSG00000028832	0.641942	6.41705	9.60736	0.00193799	0.0850173	chr4	+	134468320	134473843	NM_019641	Stmn1	stathmin 1 [Source:MGI Symbol;Acc:MGI:96739]
ENSMUSG00000022421	0.657654	2.93946	9.56544	0.00198275	0.0866733	chr15	-	79804709	79786352	NM_030689	Nptxr	neuronal pentraxin receptor [Source:MGI Symbol;Acc:MGI:1920590]
ENSMUSG00000045268	-0.551555	3.24044	9.54634	0.00200349	0.0872716	chr4	-	119173856	119169513	NM_183140	Zfp691	zinc finger protein 691 [Source:MGI Symbol;Acc:MGI:3041163]
ENSMUSG00000021215	0.37586	6.86292	9.53578	0.00201504	0.0874669	chr13	-	3918220	3882565	NM_019671	Net1	neuroepithelial cell transforming gene 1 [Source:MGI Symbol;Acc:MGI:1927138]
ENSMUSG00000022508	-0.518545	6.42047	9.52496	0.00202696	0.087543	chr16	-	23988852	23965052	NM_009744	Bcl6	B cell leukemia/lymphoma 6 [Source:MGI Symbol;Acc:MGI:107187]
ENSMUSG00000020722	-0.589782	7.33129	9.52135	0.00203095	0.087543	chr11	-	107716522	107703218	NM_007582	Cacng1	calcium channel, voltage-dependent, gamma subunit 1 [Source:MGI Symbol;Acc:MGI:1206582]
ENSMUSG00000039990	-0.377583	5.14716	9.48152	0.00207551	0.0889928	chr7	+	133637543	133672971	NM_178115	Edrf1	erythroid differentiation regulatory factor 1 [Source:MGI Symbol;Acc:MGI:1919831]
ENSMUSG00000026610	-1.02063	3.58628	9.4764	0.00208132	0.0889928	chr1	+	187609029	188214386	NM_001243792	Esrrg	estrogen-related receptor gamma [Source:MGI Symbol;Acc:MGI:1347056]
ENSMUSG00000055301	-1.41853	0.0779007	9.46919	0.00208952	0.0889928	chr3	+	138217760	138233382	NM_009626	Adh7	alcohol dehydrogenase 7 (class IV), mu or sigma polypeptide [Source:MGI Symbol;Acc:MGI:87926]
ENSMUSG00000005089	1.55711	0.374342	9.46582	0.00209336	0.0889928	chr2	+	102658659	102790784	NM_001077514	Slc1a2	solute carrier family 1 (glial high affinity glutamate transporter), member 2 [Source:MGI Symbol;Acc:MGI:101931]
ENSMUSG00000042216	-1.3483	-0.147121	9.4296	0.0021351	0.0904568	chr5	-	113310786	113243220	NM_172718	Sgsm1	small G protein signaling modulator 1 [Source:MGI Symbol;Acc:MGI:107320]
ENSMUSG00000027944	-0.486272	6.29659	9.41542	0.00215168	0.0905681	chr3	-	89998697	89995446	NM_011826	Hax1	HCLS1 associated X-1 [Source:MGI Symbol;Acc:MGI:1346319]
ENSMUSG00000078566	-0.675915	7.18119	9.41296	0.00215457	0.0905681	chr7	-	138909506	138890836	NM_009760	Bnip3	BCL2/adenovirus E1B interacting protein 3 [Source:MGI Symbol;Acc:MGI:109326]
ENSMUSG00000027419	0.929569	1.51682	9.4075	0.002161	0.0905681	chr2	+	143546156	143816285	NM_008792	Pcsk2	proprotein convertase subtilisin/kexin type 2 [Source:MGI Symbol;Acc:MGI:97512]
ENSMUSG00000016252	-0.49653	6.53311	9.39987	0.00217001	0.0905681	chr2	-	174464105	174461072	NM_025983	Atp5e	ATP synthase, H+ transporting, mitochondrial F1 complex, epsilon subunit [Source:MGI Symbol;Acc:MGI:1855697]
ENSMUSG00000030108	-1.02212	-0.0465462	9.39166	0.00217975	0.0905681	chr6	+	121300227	121337733	NM_144512	Slc6a13	solute carrier family 6 (neurotransmitter transporter, GABA), member 13 [Source:MGI Symbol;Acc:MGI:95629]
ENSMUSG00000045790	1.07001	0.192723	9.39005	0.00218166	0.0905681	chr5	-	52471521	52374651	NM_001256059	Ccdc149	coiled-coil domain containing 149 [Source:MGI Symbol;Acc:MGI:2685293]
ENSMUSG00000027533	0.87963	4.60079	9.38372	0.00218921	0.0905777	chr3	+	10012548	10016607	NM_010634	Fabp5	fatty acid binding protein 5, epidermal [Source:MGI Symbol;Acc:MGI:101790]
ENSMUSG00000029826	0.66849	5.15207	9.3597	0.00221809	0.0914665	chr6	-	38354273	38310587	NM_028421	Zc3hav1	zinc finger CCCH type, antiviral 1 [Source:MGI Symbol;Acc:MGI:1926031]
ENSMUSG00000072945	-0.713778	4.65164	9.34691	0.00223361	0.0917007	chrX	-	139782353	139779549	NM_001037915	Ripply1	ripply1 homolog (zebrafish) [Source:MGI Symbol;Acc:MGI:3614797]
ENSMUSG00000048218	1.07942	4.04982	9.33914	0.00224311	0.0917007	chr15	-	97247287	97244074	NM_001164602	Amigo2	adhesion molecule with Ig like domain 2 [Source:MGI Symbol;Acc:MGI:2145995]
ENSMUSG00000010175	0.488324	3.65639	9.33677	0.002246	0.0917007	chr1	-	190170714	190118035	NM_008937	Prox1	prospero homeobox 1 [Source:MGI Symbol;Acc:MGI:97772]
ENSMUSG00000070934	-0.345949	5.72429	9.30321	0.00228753	0.092828	chr4	+	86575668	86577285	NM_178376	Rraga	Ras-related GTP binding A [Source:MGI Symbol;Acc:MGI:1915691]
ENSMUSG00000040594	0.708299	1.55384	9.30233	0.00228862	0.092828	chr11	-	33513746	33211795	NM_023146	Ranbp17	RAN binding protein 17 [Source:MGI Symbol;Acc:MGI:1929706]
ENSMUSG00000029484	-0.686799	6.85568	9.27491	0.00232314	0.0932999	chr5	+	96793385	96845966	NM_013470	Anxa3	annexin A3 [Source:MGI Symbol;Acc:MGI:1201378]
ENSMUSG00000001334	-0.562552	7.38806	9.27159	0.00232736	0.0932999	chr4	+	129136999	129144593	NM_027402	Fndc5	fibronectin type III domain containing 5 [Source:MGI Symbol;Acc:MGI:1917614]
ENSMUSG00000039745	-0.500833	3.15603	9.27118	0.00232788	0.0932999	chr7	+	49759106	49773999	NM_001146049	Htatip2	HIV-1 tat interactive protein 2, homolog (human) [Source:MGI Symbol;Acc:MGI:1859271]
ENSMUSG00000031962	-0.49879	9.10248	9.26328	0.00233794	0.0932999	chr8	+	122848374	122867397	NM_007662	Cdh15	cadherin 15 [Source:MGI Symbol;Acc:MGI:106672]
ENSMUSG00000031303	0.841581	0.594695	9.26326	0.00233797	0.0932999	chrX	+	159988433	160123351	NM_001163085	Map3k15	mitogen-activated protein kinase kinase kinase 15 [Source:MGI Symbol;Acc:MGI:2448588]
ENSMUSG00000033644	-1.21052	0.485624	9.23323	0.00237662	0.0945374	chr14	-	70429094	70372480	NM_021308	Piwil2	piwi-like RNA-mediated gene silencing 2 [Source:MGI Symbol;Acc:MGI:1930036]
ENSMUSG00000027510	-0.66051	6.16253	9.21656	0.00239836	0.0950965	chr2	+	173021902	173034725	NM_019547	Rbm38	RNA binding motif protein 38 [Source:MGI Symbol;Acc:MGI:1889294]
ENSMUSG00000021745	0.577352	6.00363	9.20502	0.00241353	0.0953921	chr14	+	11553532	12242041	NM_008981	Ptprg	protein tyrosine phosphatase, receptor type, G [Source:MGI Symbol;Acc:MGI:97814]
ENSMUSG00000026987	0.389395	5.49066	9.18661	0.00243792	0.0960303	chr2	-	60125697	59899363	NM_001001182	Baz2b	bromodomain adjacent to zinc finger domain, 2B [Source:MGI Symbol;Acc:MGI:2442782]
ENSMUSG00000072946	-0.444322	6.48438	9.18115	0.0024452	0.0960303	chr12	+	84285232	84315832	NM_029880	Ptgr2	prostaglandin reductase 2 [Source:MGI Symbol;Acc:MGI:1916372]
ENSMUSG00000059493	0.877392	0.849786	9.14961	0.00248771	0.0973907	chrX	-	162159730	161833296	NM_001290526	Nhs	Nance-Horan syndrome (human) [Source:MGI Symbol;Acc:MGI:2684894]
ENSMUSG00000038552	0.569987	3.68552	9.13673	0.00250529	0.0975296	chr5	-	31295936	31292242	NM_022424	Fndc4	fibronectin type III domain containing 4 [Source:MGI Symbol;Acc:MGI:1917195]
ENSMUSG00000027919	1.36736	0.809823	9.13546	0.00250703	0.0975296	chr3	-	92752338	92750148	NM_025413	Lce1g	late cornified envelope 1G [Source:MGI Symbol;Acc:MGI:1913445]
ENSMUSG00000033767	0.387041	5.71696	9.11365	0.00253709	0.0983899	chr3	-	84040175	83897655	NM_172681	D930015E06Rik	RIKEN cDNA D930015E06 gene [Source:MGI Symbol;Acc:MGI:2443399]
ENSMUSG00000079110	-0.707908	6.57957	9.10167	0.00255377	0.098727	chr2	+	120463579	120504913	NM_007601	Capn3	calpain 3 [Source:MGI Symbol;Acc:MGI:107437]
ENSMUSG00000068614	-0.728138	11.6698	9.07293	0.00259421	0.0999781	chr2	-	114052887	114047282	NM_009608	Actc1	actin, alpha, cardiac muscle 1 [Source:MGI Symbol;Acc:MGI:87905]
ENSMUSG00000031111	1.96284	0.436442	9.06711	0.00260248	0.0999854	chrX	-	49797749	49782536	NM_177591	Igsf1	immunoglobulin superfamily, member 1 [Source:MGI Symbol;Acc:MGI:2147913]

## Sheet: Irr_HfdVsCh
ensembl_gene_id	logFC	logCPM	LR	PValue	FDR	chromosome_name	strand	transcript_start	transcript_end	refseq_mrna	mgi_symbol	description
ENSMUSG00000034205	1.6818	3.68956	23.0554	1.57397e-06	0.0194716	chr14	+	69609478	69693698	NM_033325	Loxl2	lysyl oxidase-like 2 [Source:MGI Symbol;Acc:MGI:2137913]
