# Supplementary material for: Ionizing Radiation Potentiates High-Fat Diet–Induced Insulin Resistance and Reprograms Skeletal Muscle and Adipose Progenitor Cells
Source: Oxford University Press journal article supplement (doi:10.2337/db16-0364), 2016-09-20
Supplement: db160364supplementarydata7.xlsx [file db160364supplementarydata7.xlsx]

## Sheet: radiation
	seqnames	start	end	width	strand	median.p_SVF	median.meth.group1_SVF	median.meth.group2_SVF	median.meth.diff_SVF	median.p_satelliteCells	median.meth.group1_satelliteCells	median.meth.group2_satelliteCells	median.meth.diff_satelliteCells	sameDirection	annotation	geneChr	geneStart	geneEnd	geneLength	geneStrand	geneId	transcriptId	distanceToTSS	ENSEMBL	SYMBOL	GENENAME
1	chr1	13373599	13373776	178	*	6.30829e-17	0.384185	0.000182295	0.384003	1.21334e-06	0.000309694	0.00945895	-0.00914926	FALSE	Promoter (<=1kb)	chr1	13139105	13374083	234979	-	17978	uc007aim.2	307	ENSMUSG00000005886	Ncoa2	nuclear receptor coactivator 2
2	chr1	16518988	16518988	1	*	3.43674e-05	5.91556e-05	0.00205565	-0.00201185	0.000129297	0.00307862	8.32356e-05	0.00299538	FALSE	Promoter (<=1kb)	chr1	16228810	16519302	290493	-	29819	uc007ajn.2	314	ENSMUSG00000025920	Stau2	staufen (RNA binding protein) homolog 2 (Drosophila)
3	chr1	16519001	16519107	107	*	3.43674e-05	5.91556e-05	0.00205565	-0.00201185	2.4421e-06	0.00669945	0.326995	-0.320296	TRUE	Promoter (<=1kb)	chr1	16228810	16519302	290493	-	29819	uc007ajn.2	195	ENSMUSG00000025920	Stau2	staufen (RNA binding protein) homolog 2 (Drosophila)
4	chr1	24005481	24005607	127	*	1.1485e-10	0.383342	0.00170058	0.381659	1.40864e-07	0.00427529	0.336305	-0.331784	FALSE	Promoter (<=1kb)	chr1	23995939	24005640	9702	-	68002	uc007amj.2	33	ENSMUSG00000026154	Sdhaf4	succinate dehydrogenase complex assembly factor 4
5	chr1	36308119	36308160	42	*	1.69654e-06	0.00400206	4.23568e-05	0.0039597	3.02949e-07	0.00616829	4.80532e-05	0.00612024	TRUE	Promoter (<=1kb)	chr1	36307733	36324029	16297	+	214855	uc007apu.2	427	ENSMUSG00000037447	Arid5a	AT rich interactive domain 5A (MRF1-like)
6	chr1	39900591	39900651	61	*	3.77708e-11	0.383791	0.00131769	0.382168	4.53202e-07	0.00327677	0.301531	-0.298254	FALSE	Promoter (<=1kb)	chr1	39900913	40026310	125398	+	26921	uc007atr.1	-322	ENSMUSG00000026074	Map4k4	mitogen-activated protein kinase kinase kinase kinase 4
7	chr1	57377598	57377659	62	*	5.57789e-05	0.000602674	3.05205e-05	0.000572154	8.19263e-08	3.4567e-05	0.00204272	-0.00200815	FALSE	Promoter (<=1kb)	chr1	57377620	57385422	7803	+	73467	uc007bay.2	0	ENSMUSG00000038323	1700066M21Rik	RIKEN cDNA 1700066M21 gene
8	chr1	57969896	57969900	5	*	1.12555e-10	0.385348	0.00127862	0.38407	2.18096e-05	0.0196564	0.000185132	0.0194713	TRUE	Promoter (<=1kb)	chr1	57955101	57970084	14984	-	51960	uc007bbf.2	184	ENSMUSG00000054770	Kctd18	potassium channel tetramerisation domain containing 18
9	chr1	57970189	57970245	57	*	8.19125e-05	2.99102e-05	0.000768979	-0.000739068	7.91431e-08	0.00136675	2.36432e-05	0.0013431	FALSE	Promoter (<=1kb)	chr1	57955101	57970084	14984	-	51960	uc007bbf.2	-105	ENSMUSG00000054770	Kctd18	potassium channel tetramerisation domain containing 18
10	chr1	62703099	62703118	20	*	3.97194e-05	0.00129585	3.7326e-05	0.00125853	4.48952e-09	0.0016905	0.319368	-0.317677	FALSE	Promoter (<=1kb)	chr1	62703317	62739932	36616	+	18187	uc007bfi.1	-218	ENSMUSG00000025969	Nrp2	neuropilin 2
11	chr1	64121916	64122016	101	*	6.60493e-05	3.0397e-05	0.000850925	-0.000820528	2.84687e-05	2.3973e-05	0.000596452	-0.000572479	TRUE	Promoter (<=1kb)	chr1	64035671	64121426	85756	-	93691	uc007bgp.2	-490	ENSMUSG00000025959	Klf7	Kruppel-like factor 7 (ubiquitous)
12	chr1	64121916	64122016	101	*	3.44005e-05	0.00171251	4.4555e-05	0.00166796	2.84687e-05	2.3973e-05	0.000596452	-0.000572479	FALSE	Promoter (<=1kb)	chr1	64035671	64121426	85756	-	93691	uc007bgp.2	-490	ENSMUSG00000025959	Klf7	Kruppel-like factor 7 (ubiquitous)
13	chr1	64122133	64122133	1	*	3.44005e-05	0.00171251	4.4555e-05	0.00166796	1.11117e-09	0.00166203	0.34503	-0.343368	FALSE	Promoter (<=1kb)	chr1	64035671	64121426	85756	-	93691	uc007bgp.2	-707	ENSMUSG00000025959	Klf7	Kruppel-like factor 7 (ubiquitous)
14	chr1	64533430	64533473	44	*	0.000144231	3.01157e-05	0.000604761	-0.000574645	4.50567e-09	2.33715e-05	0.00121483	-0.00119146	TRUE	Promoter (<=1kb)	chr1	64532804	64604548	71745	+	12912	uc007bgr.1	669	ENSMUSG00000025958	Creb1	cAMP responsive element binding protein 1
15	chr1	65186817	65186890	74	*	5.77426e-08	3.2108e-05	0.00357012	-0.00353812	1.59632e-06	0.341169	0.00702808	0.334338	FALSE	Promoter (<=1kb)	chr1	65186685	65226117	39433	+	18711	uc007bhq.1	205	ENSMUSG00000025949	Pikfyve	phosphoinositide kinase, FYVE finger containing
16	chr1	74661856	74661923	68	*	7.97131e-13	0.384166	0.000642123	0.383524	8.95324e-07	0.00435308	4.80536e-05	0.00430493	TRUE	Promoter (<=1kb)	chr1	74661754	74697973	36220	+	67534	uc007bmy.1	169	ENSMUSG00000033257	Ttll4	tubulin tyrosine ligase-like family, member 4
17	chr1	75505566	75505632	67	*	3.49689e-54	3.20496e-05	0.011946	-0.0119112	4.82453e-08	0.00347989	0.333827	-0.329674	TRUE	Promoter (<=1kb)	chr1	75485825	75506452	20628	-	98733	uc007bpn.2	820	ENSMUSG00000026211	Obsl1	obscurin-like 1
18	chr1	75546417	75546462	46	*	1.1138e-05	7.37298e-05	0.00729741	-0.00724987	3.13882e-10	0.300293	0.000921599	0.299371	FALSE	Promoter (<=1kb)	chr1	75546266	75559431	13166	+	20536	uc007bpv.2	196	ENSMUSG00000006576	Slc4a3	solute carrier family 4 (anion exchanger), member 3
19	chr1	75546572	75546603	32	*	1.1138e-05	7.37298e-05	0.00729741	-0.00724987	0.00090188	0.000127339	0.00241542	-0.00228809	TRUE	Promoter (<=1kb)	chr1	75546644	75559431	12788	+	20536	uc007bpw.2	-72	ENSMUSG00000006576	Slc4a3	solute carrier family 4 (anion exchanger), member 3
20	chr1	82291722	82291850	129	*	7.21897e-08	0.380699	0.00508087	0.375618	2.60949e-08	3.42487e-05	0.00425335	-0.0042191	FALSE	Promoter (<=1kb)	chr1	82233105	82291439	58335	-	16367	uc007brp.2	-283	ENSMUSG00000055980	Irs1	insulin receptor substrate 1
21	chr1	82291851	82291878	28	*	7.21897e-08	0.380699	0.00508087	0.375618	5.02628e-07	0.337053	0.00419905	0.332854	TRUE	Promoter (<=1kb)	chr1	82233105	82291439	58335	-	16367	uc007brp.2	-412	ENSMUSG00000055980	Irs1	insulin receptor substrate 1
22	chr1	86581993	86582031	39	*	0.000119797	0.00938344	0.000163026	0.00922041	0.00114575	0.0137246	0.000312222	0.0134123	TRUE	Promoter (<=1kb)	chr1	86543015	86582501	39487	-	18582	uc007bvq.1	470	ENSMUSG00000026239	Pde6d	phosphodiesterase 6D, cGMP-specific, rod, delta
23	chr1	86582391	86582401	11	*	1.48398e-08	0.00189628	3.29674e-05	0.00186332	0.00105791	0.301206	0.022108	0.279098	TRUE	Promoter (<=1kb)	chr1	86543015	86582501	39487	-	18582	uc007bvq.1	100	ENSMUSG00000026239	Pde6d	phosphodiesterase 6D, cGMP-specific, rod, delta
24	chr1	88008401	88008463	63	*	1.85381e-05	3.07802e-05	0.00151357	-0.00147857	6.71725e-10	0.0017205	0.337061	-0.335341	TRUE	Promoter (<=1kb)	chr1	87945121	88008551	63431	-	227334	uc007bxw.1	88	ENSMUSG00000005501	Usp40	ubiquitin specific peptidase 40
25	chr1	89454675	89454822	148	*	3.79948e-06	3.06844e-05	0.00137665	-0.00134597	2.31836e-08	0.00205459	2.39049e-05	0.00203097	FALSE	Promoter (<=1kb)	chr1	89454811	89895282	440472	+	347722	uc007byw.1	0	ENSMUSG00000055013	Agap1	ArfGAP with GTPase domain, ankyrin repeat and PH domain 1
26	chr1	93686205	93686301	97	*	2.5696e-05	0.00402153	8.03093e-05	0.00392723	2.51205e-10	0.00138125	0.337962	-0.336531	FALSE	Promoter (<=1kb)	chr1	93685694	93695762	10069	+	51800	uc007cee.1	607	ENSMUSG00000026278	Bok	BCL2-related ovarian killer
27	chr1	105664306	105664308	3	*	6.89638e-06	0.00302344	4.49032e-05	0.00297854	3.8611e-06	2.32864e-05	0.000846104	-0.000822818	FALSE	Promoter (<=1kb)	chr1	105663861	105665150	1290	+	227446	uc007cgi.2	447	ENSMUSG00000026319	2310035C23Rik	RIKEN cDNA 2310035C23 gene
28	chr1	105993908	105993990	83	*	2.58455e-11	0.383134	0.00137892	0.381774	1.02388e-05	0.00561911	7.21055e-05	0.005547	TRUE	Intron (uc007cgq.3/227449, intron 1 of 12)	chr1	105990406	106034079	43674	+	227449	uc007cgq.3	3584	ENSMUSG00000038866	Zcchc2	zinc finger, CCHC domain containing 2
29	chr1	105993991	105993996	6	*	2.58455e-11	0.383134	0.00137892	0.381774	4.76747e-09	0.00177913	0.334383	-0.332604	FALSE	Intron (uc007cgq.3/227449, intron 1 of 12)	chr1	105990406	106034079	43674	+	227449	uc007cgq.3	3590	ENSMUSG00000038866	Zcchc2	zinc finger, CCHC domain containing 2
30	chr1	105993997	105994034	38	*	2.58455e-11	0.383134	0.00137892	0.381774	2.64786e-05	0.000909483	2.70943e-05	0.000882389	TRUE	Intron (uc007cgq.3/227449, intron 1 of 12)	chr1	105990406	106034079	43674	+	227449	uc007cgq.3	3628	ENSMUSG00000038866	Zcchc2	zinc finger, CCHC domain containing 2
31	chr1	106714368	106714368	1	*	1.30079e-06	0.00162977	3.41835e-05	0.00159482	0.000937303	0.000499813	0.0144226	-0.0139228	FALSE	Promoter (<=1kb)	chr1	106538178	106714290	176113	-	12043	uc007cgw.2	-78	ENSMUSG00000057329	Bcl2	B cell leukemia/lymphoma 2
32	chr1	119648466	119648543	78	*	4.67953e-11	0.00309383	3.37064e-05	0.00306106	2.83845e-10	3.36928e-05	0.00979705	-0.00967713	FALSE	Promoter (<=1kb)	chr1	119594824	119648617	53794	-	226352	uc007cix.2	74	ENSMUSG00000026383	Epb41l5	erythrocyte membrane protein band 4.1 like 5
33	chr1	119837203	119837250	48	*	2.98141e-09	0.3373	0.00162986	0.335618	3.57614e-08	0.334818	0.00252315	0.332295	TRUE	Promoter (<=1kb)	chr1	119658093	119837071	178979	-	19258	uc007ciz.1	-132	ENSMUSG00000026384	Ptpn4	protein tyrosine phosphatase, non-receptor type 4
34	chr1	121327494	121327569	76	*	3.80012e-06	0.00313899	4.18199e-05	0.00309717	2.08996e-10	0.00507143	2.65104e-05	0.00504492	TRUE	Promoter (<=1kb)	chr1	121304353	121327678	23326	-	72999	uc007cjo.1	109	ENSMUSG00000003721	Insig2	insulin induced gene 2
35	chr1	133045852	133045907	56	*	0.000122645	4.24652e-05	0.00133661	-0.00129415	2.55402e-07	4.22329e-05	0.00394881	-0.00390658	TRUE	Promoter (<=1kb)	chr1	133046012	133068033	22022	+	240752	uc007cpq.1	-160	ENSMUSG00000026447	Pik3c2b	phosphoinositide-3-kinase, class 2, beta polypeptide
36	chr1	134361918	134362027	110	*	4.7877e-05	0.000587906	3.10153e-05	0.000556891	0.00180329	0.0290369	0.000920471	0.0278086	TRUE	Promoter (<=1kb)	chr1	134346097	134361999	15903	-	57439	uc007crq.1	0	ENSMUSG00000042305	Tmem183a	transmembrane protein 183A
37	chr1	135147086	135147123	38	*	1.20302e-05	0.00190001	3.93398e-05	0.00186068	5.59154e-05	2.30507e-05	0.00050337	-0.000480326	FALSE	Promoter (<=1kb)	chr1	135146834	135156268	9435	+	68724	uc007csu.1	289	ENSMUSG00000026426	Arl8a	ADP-ribosylation factor-like 8A
38	chr1	135147473	135147473	1	*	2.28814e-08	0.378393	0.00528323	0.372474	0.00246041	0.00011896	2.29949e-05	9.59649e-05	TRUE	Promoter (<=1kb)	chr1	135146834	135156268	9435	+	68724	uc007csu.1	639	ENSMUSG00000026426	Arl8a	ADP-ribosylation factor-like 8A
39	chr1	135430223	135430250	28	*	0.00265499	3.65833e-05	0.000353703	-0.00031712	7.39417e-07	0.00312853	0.299021	-0.295893	TRUE	Promoter (<=1kb)	chr1	135382315	135430491	48177	-	226432	uc007cte.1	241	ENSMUSG00000041879	Ipo9	importin 9
40	chr1	139422356	139422401	46	*	0.000112796	2.98595e-05	0.000649387	-0.000619527	0.000709481	0.00900853	0.000313296	0.00873812	FALSE	Promoter (<=1kb)	chr1	139422383	139453007	30625	+	226470	uc007cwg.2	0	ENSMUSG00000033964	Zbtb41	zinc finger and BTB domain containing 41 homolog
41	chr1	152386649	152386685	37	*	0.000260569	3.00237e-05	0.000537339	-0.000507147	0.000393519	0.319931	0.0214173	0.298514	FALSE	Promoter (<=1kb)	chr1	152370736	152386682	15947	-	66637	uc007czf.2	0	ENSMUSG00000014980	Tsen15	tRNA splicing endonuclease 15 homolog (S. cerevisiae)
42	chr1	152902874	152902950	77	*	6.54101e-05	0.000697133	3.19965e-05	0.000665137	2.73533e-11	0.00105756	0.346331	-0.345275	FALSE	Promoter (<=1kb)	chr1	152836995	152902646	65652	-	226517	uc007czo.2	-228	ENSMUSG00000042772	Smg7	Smg-7 homolog, nonsense mediated mRNA decay factor (C. elegans)
43	chr1	153487356	153487427	72	*	5.56934e-11	0.00317283	3.76783e-05	0.00313587	1.26313e-12	0.00310626	2.47211e-05	0.00308169	TRUE	Promoter (<=1kb)	chr1	153455758	153487660	31903	-	13211	uc007czy.1	233	ENSMUSG00000042699	Dhx9	DEAH (Asp-Glu-Ala-His) box polypeptide 9
44	chr1	156939257	156939381	125	*	1.84539e-08	0.00243193	3.57566e-05	0.00239617	3.58214e-10	0.00361574	2.62608e-05	0.00358948	TRUE	Promoter (<=1kb)	chr1	156804166	156939387	135222	-	78255	uc011wui.1	6	ENSMUSG00000026594	Ralgps2	Ral GEF with PH domain and SH3 binding motif 2
45	chr1	157412202	157412274	73	*	7.54005e-07	3.13864e-05	0.00121098	-0.00118003	6.39962e-10	0.342394	0.00177128	0.340623	FALSE	Promoter (<=1kb)	chr1	157412352	157420236	7885	+	69953	uc007ddi.1	-150	ENSMUSG00000049881	2810025M15Rik	RIKEN cDNA 2810025M15 gene
46	chr1	164249351	164249404	54	*	1.80581e-06	0.00174466	3.7398e-05	0.00170791	3.35397e-12	0.345108	0.000776221	0.344276	TRUE	Promoter (<=1kb)	chr1	164249046	164265385	16340	+	116914	uc007did.2	358	ENSMUSG00000040918	Slc19a2	solute carrier family 19 (thiamine transporter), member 2
47	chr1	165281816	165281854	39	*	6.39589e-05	0.00350907	0.222065	-0.218556	1.29908e-05	0.000297838	0.0278111	-0.0275133	TRUE	Distal Intergenic	chr1	165295766	165321851	26086	+	240888	uc007dja.1	-13950	ENSMUSG00000040836	Gpr161	G protein-coupled receptor 161
48	chr1	165281879	165281931	53	*	6.39589e-05	0.00350907	0.222065	-0.218556	8.78116e-05	0.326578	0.0135091	0.313069	FALSE	Distal Intergenic	chr1	165295766	165321851	26086	+	240888	uc007dja.1	-13887	ENSMUSG00000040836	Gpr161	G protein-coupled receptor 161
49	chr1	165281879	165281931	53	*	7.15924e-05	0.000718728	3.26022e-05	0.000686125	8.78116e-05	0.326578	0.0135091	0.313069	TRUE	Distal Intergenic	chr1	165295766	165321851	26086	+	240888	uc007dja.1	-13887	ENSMUSG00000040836	Gpr161	G protein-coupled receptor 161
50	chr1	171294471	171294484	14	*	0.00254081	2.96985e-05	0.000220905	-0.000191207	4.32489e-07	3.35238e-05	0.00460189	-0.00456837	TRUE	Promoter (<=1kb)	chr1	171288564	171294982	6419	-	66155	uc007dnw.1	498	ENSMUSG00000062963	Ufc1	ubiquitin-fold modifier conjugating enzyme 1
51	chr1	171294921	171295010	90	*	1.93577e-09	0.368755	0.00175005	0.367005	0.000768068	0.0203327	0.000710239	0.0196941	TRUE	Promoter (<=1kb)	chr1	171288564	171294982	6419	-	66155	uc007dnw.1	0	ENSMUSG00000062963	Ufc1	ubiquitin-fold modifier conjugating enzyme 1
52	chr1	171294921	171295010	90	*	0.000453239	0.00014041	0.00558729	-0.00544688	0.000768068	0.0203327	0.000710239	0.0196941	FALSE	Promoter (<=1kb)	chr1	171288564	171294982	6419	-	66155	uc007dnw.1	0	ENSMUSG00000062963	Ufc1	ubiquitin-fold modifier conjugating enzyme 1
53	chr1	172376601	172376819	219	*	1.66029e-06	3.83382e-05	0.00301486	-0.00297441	1.14269e-06	0.00559347	0.336966	-0.33243	TRUE	Promoter (<=1kb)	chr1	172376531	172384099	7569	+	67556	uc007dqk.2	288	ENSMUSG00000050229	Pigm	phosphatidylinositol glycan anchor biosynthesis, class M
54	chr1	172376601	172376819	219	*	1.51421e-06	0.00266179	4.31755e-05	0.00261862	1.14269e-06	0.00559347	0.336966	-0.33243	FALSE	Promoter (<=1kb)	chr1	172376531	172384099	7569	+	67556	uc007dqk.2	288	ENSMUSG00000050229	Pigm	phosphatidylinositol glycan anchor biosynthesis, class M
55	chr1	175692158	175692200	43	*	6.79072e-05	0.350821	0.0113156	0.339506	7.80037e-06	0.344299	0.00590007	0.338398	TRUE	Promoter (<=1kb)	chr1	175662421	175692632	30212	-	13603	uc007dtq.2	432	ENSMUSG00000026525	Opn3	opsin 3
56	chr1	179546794	179546833	40	*	1.34818e-05	0.000566121	2.99922e-05	0.000536177	1.69329e-15	0.000241791	0.344984	-0.344728	FALSE	Promoter (<=1kb)	chr1	179546529	179582936	36408	+	226744	uc007dvm.1	304	ENSMUSG00000038949	Cnst	consortin, connexin sorting protein
57	chr1	182124962	182125064	103	*	4.59954e-05	3.39798e-05	0.00130088	-0.0012666	1.85961e-08	3.78752e-05	0.00328747	-0.00325031	TRUE	Promoter (<=1kb)	chr1	182124737	182132415	7679	+	27058	uc007dxu.2	327	ENSMUSG00000026511	Srp9	signal recognition particle 9
58	chr1	182124962	182125064	103	*	4.63997e-09	0.375597	0.000860195	0.373311	1.85961e-08	3.78752e-05	0.00328747	-0.00325031	FALSE	Promoter (<=1kb)	chr1	182124737	182132415	7679	+	27058	uc007dxu.2	327	ENSMUSG00000026511	Srp9	signal recognition particle 9
59	chr1	183369253	183369301	49	*	1.15047e-09	0.383763	0.00196175	0.381802	3.80535e-14	0.346809	0.000361072	0.346448	TRUE	Promoter (<=1kb)	chr1	183326236	183369565	43330	-	338366	uc008icw.1	264	#N/A	Mia3	melanoma inhibitory activity 3
60	chr1	183369388	183369516	129	*	5.05559e-08	0.375094	0.00316918	0.371925	2.40627e-06	0.00706494	0.335692	-0.32924	FALSE	Promoter (<=1kb)	chr1	183326236	183369565	43330	-	338366	uc008icw.1	49	#N/A	Mia3	melanoma inhibitory activity 3
61	chr1	185329016	185329055	40	*	0.00496795	0.00914943	0.178409	-0.169259	1.38029e-06	0.00205625	0.288956	-0.284518	TRUE	Promoter (<=1kb)	chr1	185286662	185329401	42740	-	381314	uc007dyz.1	346	ENSMUSG00000026618	Iars2	isoleucine-tRNA synthetase 2, mitochondrial
62	chr1	185332109	185332207	99	*	3.91879e-14	0.384934	0.000434267	0.384481	1.77758e-06	0.0235869	0.00028139	0.0233055	TRUE	Promoter (<=1kb)	chr1	185332159	185357769	25611	+	23827	uc007dzc.1	0	ENSMUSG00000026617	Bpnt1	bisphosphate 3'-nucleotidase 1
63	chr1	191063043	191063076	34	*	2.49134e-07	6.67042e-05	0.0157818	-0.0157151	1.40668e-05	0.0105894	0.320242	-0.309653	TRUE	Promoter (<=1kb)	chr1	191063021	191076939	13919	+	381318	uc007eca.2	55	ENSMUSG00000062510	Nsl1	NSL1, MIND kinetochore complex component, homolog (S. cerevisiae)
64	chr1	191326147	191326198	52	*	5.94336e-05	0.000232228	0.0104069	-0.0101747	1.17028e-10	0.00140256	0.344225	-0.342885	TRUE	Promoter (<=1kb)	chr1	191325965	191352925	26961	+	66950	uc007ech.1	233	ENSMUSG00000026627	Tmem206	transmembrane protein 206
65	chr10	13964702	13964771	70	*	1.76629e-06	3.30298e-05	0.00119918	-0.00116615	2.5557e-08	0.00353874	0.343224	-0.339683	TRUE	Promoter (1-2kb)	chr10	13966077	14151378	185302	+	15273	uc007elg.1	-1375	ENSMUSG00000015501	Hivep2	human immunodeficiency virus type I enhancer binding protein 2
66	chr10	13965181	13965257	77	*	0.000677423	0.0491853	0.00111601	0.0480693	0.000183669	0.0483325	0.000608016	0.0477245	TRUE	Promoter (<=1kb)	chr10	13966077	14151378	185302	+	15273	uc007elg.1	-896	ENSMUSG00000015501	Hivep2	human immunodeficiency virus type I enhancer binding protein 2
67	chr10	13966109	13966122	14	*	0.000379223	6.65e-05	0.00289184	-0.00282534	0.000174995	0.0157531	0.000304865	0.0154482	FALSE	Promoter (<=1kb)	chr10	13966077	14151378	185302	+	15273	uc007elg.1	45	ENSMUSG00000015501	Hivep2	human immunodeficiency virus type I enhancer binding protein 2
68	chr10	14705282	14705365	84	*	3.11294e-07	3.11958e-05	0.00167201	-0.00164082	1.71504e-06	0.340754	0.00898747	0.332488	FALSE	Promoter (<=1kb)	chr10	14655333	14705489	50157	-	66201	uc007ell.1	124	ENSMUSG00000019868	Vta1	Vps20-associated 1 homolog (S. cerevisiae)
69	chr10	18056059	18056248	190	*	1.24282e-05	0.00258536	5.76027e-05	0.00252776	1.37049e-05	0.30265	0.00136903	0.293459	TRUE	Promoter (<=1kb)	chr10	18055940	18125155	69216	+	19707	uc007ema.2	308	ENSMUSG00000019854	Reps1	RalBP1 associated Eps domain containing protein
70	chr10	18056059	18056248	190	*	4.91991e-05	3.65704e-05	0.00152027	-0.0014837	1.37049e-05	0.30265	0.00136903	0.293459	FALSE	Promoter (<=1kb)	chr10	18055940	18125155	69216	+	19707	uc007ema.2	308	ENSMUSG00000019854	Reps1	RalBP1 associated Eps domain containing protein
71	chr10	18056059	18056248	190	*	1.324e-12	0.384986	0.000688046	0.384298	1.37049e-05	0.30265	0.00136903	0.293459	TRUE	Promoter (<=1kb)	chr10	18055940	18125155	69216	+	19707	uc007ema.2	308	ENSMUSG00000019854	Reps1	RalBP1 associated Eps domain containing protein
72	chr10	20312302	20312395	94	*	4.84812e-05	0.00100157	3.8266e-05	0.000963307	2.46784e-05	0.0127305	0.326878	-0.314148	FALSE	Promoter (<=1kb)	chr10	20312469	20342501	30033	+	72567	uc007ent.1	-167	ENSMUSG00000037608	Bclaf1	BCL2-associated transcription factor 1
73	chr10	30802638	30802665	28	*	1.8446e-08	0.37179	0.00251776	0.369291	1.5069e-09	0.33595	0.00149642	0.334454	TRUE	Promoter (<=1kb)	chr10	30645582	30803107	157526	-	211329	uc007etl.2	442	ENSMUSG00000039697	Ncoa7	nuclear receptor coactivator 7
74	chr10	30802739	30802821	83	*	1.8446e-08	0.37179	0.00251776	0.369291	1.62447e-10	0.00103688	0.330415	-0.329378	FALSE	Promoter (<=1kb)	chr10	30645582	30803107	157526	-	211329	uc007etl.2	286	ENSMUSG00000039697	Ncoa7	nuclear receptor coactivator 7
75	chr10	30843039	30843039	1	*	2.28879e-06	0.00766785	7.02936e-05	0.00759755	9.82122e-06	0.0060805	0.290302	-0.284221	FALSE	Promoter (<=1kb)	chr10	30832359	30842783	10425	-	15214	uc007etp.1	-256	ENSMUSG00000019789	Hey2	hairy/enhancer-of-split related with YRPW motif 2
76	chr10	30843042	30843045	4	*	2.28879e-06	0.00766785	7.02936e-05	0.00759755	4.63566e-06	0.00606225	8.19364e-05	0.00598032	TRUE	Promoter (<=1kb)	chr10	30832359	30842783	10425	-	15214	uc007etp.1	-259	ENSMUSG00000019789	Hey2	hairy/enhancer-of-split related with YRPW motif 2
77	chr10	30843051	30843055	5	*	2.28879e-06	0.00766785	7.02936e-05	0.00759755	8.95418e-06	0.00615314	0.294465	-0.288311	FALSE	Promoter (<=1kb)	chr10	30832359	30842783	10425	-	15214	uc007etp.1	-268	ENSMUSG00000019789	Hey2	hairy/enhancer-of-split related with YRPW motif 2
78	chr10	30843061	30843061	1	*	2.28879e-06	0.00766785	7.02936e-05	0.00759755	2.09863e-06	0.0057568	6.85843e-05	0.00568822	TRUE	Promoter (<=1kb)	chr10	30832359	30842783	10425	-	15214	uc007etp.1	-278	ENSMUSG00000019789	Hey2	hairy/enhancer-of-split related with YRPW motif 2
79	chr10	30843063	30843069	7	*	2.28879e-06	0.00766785	7.02936e-05	0.00759755	3.62551e-06	0.00548987	0.304294	-0.298805	FALSE	Promoter (<=1kb)	chr10	30832359	30842783	10425	-	15214	uc007etp.1	-280	ENSMUSG00000019789	Hey2	hairy/enhancer-of-split related with YRPW motif 2
80	chr10	30843078	30843082	5	*	2.28879e-06	0.00766785	7.02936e-05	0.00759755	7.671e-07	0.00481911	5.2007e-05	0.00476711	TRUE	Promoter (<=1kb)	chr10	30832359	30842783	10425	-	15214	uc007etp.1	-295	ENSMUSG00000019789	Hey2	hairy/enhancer-of-split related with YRPW motif 2
81	chr10	42277438	42277508	71	*	7.29769e-05	3.55682e-05	0.00132207	-0.00128651	4.70673e-06	2.79378e-05	0.00143557	-0.0014076	TRUE	Promoter (<=1kb)	chr10	42185786	42276742	90957	-	56484	uc007eyl.1	-696	ENSMUSG00000048756	Foxo3	forkhead box O3
82	chr10	43901628	43901628	1	*	0.00380814	3.157e-05	0.000228718	-0.000197148	1.35934e-12	0.34666	0.000598466	0.346061	FALSE	Promoter (<=1kb)	chr10	43874190	43901736	27547	-	76563	uc007ezn.1	108	ENSMUSG00000019863	Qrsl1	glutaminyl-tRNA synthase (glutamine-hydrolyzing)-like 1
83	chr10	53597774	53597785	12	*	0.000158301	2.97703e-05	0.000587343	-0.000557757	2.44841e-08	0.00298136	2.66236e-05	0.00295473	FALSE	Promoter (<=1kb)	chr10	53537324	53597648	60325	-	71567	uc011xdv.1	-126	ENSMUSG00000058298	Mcm9	minichromosome maintenance complex component 9
84	chr10	59952293	59952339	47	*	7.88716e-07	0.379873	0.00552827	0.374344	3.7417e-09	0.0014508	0.311563	-0.310112	FALSE	Promoter (<=1kb)	chr10	59949675	59951770	2096	-	74747	uc007fee.1	-523	ENSMUSG00000020108	Ddit4	DNA-damage-inducible transcript 4
85	chr10	60277892	60277921	30	*	2.03094e-09	0.383531	0.00193701	0.381116	4.43168e-07	3.32616e-05	0.00470993	-0.00467667	FALSE	Promoter (<=1kb)	chr10	60277628	60302600	24973	+	19156	uc007feo.2	293	ENSMUSG00000004207	Psap	prosaposin
86	chr10	61649076	61649076	1	*	0.000202014	0.0197646	0.000398228	0.0193664	4.22468e-06	0.0071079	0.31929	-0.312182	FALSE	Promoter (<=1kb)	chr10	61648621	61674165	25545	+	67895	uc007fge.1	455	ENSMUSG00000020089	Ppa1	pyrophosphatase (inorganic) 1
87	chr10	61649081	61649081	1	*	0.000202014	0.0197646	0.000398228	0.0193664	1.26057e-08	0.00705168	4.809e-05	0.00700359	TRUE	Promoter (<=1kb)	chr10	61648621	61674165	25545	+	67895	uc007fge.1	460	ENSMUSG00000020089	Ppa1	pyrophosphatase (inorganic) 1
88	chr10	61649082	61649082	1	*	0.000202014	0.0197646	0.000398228	0.0193664	4.40863e-06	0.00706049	0.31712	-0.31006	FALSE	Promoter (<=1kb)	chr10	61648621	61674165	25545	+	67895	uc007fge.1	461	ENSMUSG00000020089	Ppa1	pyrophosphatase (inorganic) 1
89	chr10	61680529	61680544	16	*	5.11251e-11	0.383656	0.00116005	0.382601	0.00100669	0.269074	0.0172448	0.251829	TRUE	Promoter (<=1kb)	chr10	61680321	61693297	12977	+	20224	uc007fgg.1	223	ENSMUSG00000020088	Sar1a	SAR1 gene homolog A (S. cerevisiae)
90	chr10	61783146	61783146	1	*	6.11134e-05	3.09724e-05	0.000946664	-0.000915727	2.36487e-05	0.296828	0.00893459	0.287894	FALSE	Promoter (<=1kb)	chr10	61738647	61783864	45218	-	404634	uc007fgm.1	718	ENSMUSG00000020086	H2afy2	H2A histone family, member Y2
91	chr10	61783354	61783489	136	*	9.46559e-05	0.00176364	5.46103e-05	0.00170903	3.0008e-08	0.00233973	0.337813	-0.335259	FALSE	Promoter (<=1kb)	chr10	61738647	61783864	45218	-	404634	uc007fgm.1	375	ENSMUSG00000020086	H2afy2	H2A histone family, member Y2
92	chr10	62449672	62449700	29	*	1.03484e-05	0.0024904	4.48135e-05	0.00244004	1.78222e-08	0.337976	0.00299888	0.334978	TRUE	Promoter (<=1kb)	chr10	62429378	62449693	20316	-	338359	uc007fhd.1	0	ENSMUSG00000020079	Supv3l1	suppressor of var1, 3-like 1 (S. cerevisiae)
93	chr10	62449710	62449710	1	*	1.03484e-05	0.0024904	4.48135e-05	0.00244004	2.36419e-08	3.29215e-05	0.00335409	-0.00332116	FALSE	Promoter (<=1kb)	chr10	62429378	62449693	20316	-	338359	uc007fhd.1	-17	ENSMUSG00000020079	Supv3l1	suppressor of var1, 3-like 1 (S. cerevisiae)
94	chr10	62449752	62449766	15	*	1.03484e-05	0.0024904	4.48135e-05	0.00244004	3.61718e-06	0.33377	0.00628795	0.327482	TRUE	Promoter (<=1kb)	chr10	62429378	62449693	20316	-	338359	uc007fhd.1	-59	ENSMUSG00000020079	Supv3l1	suppressor of var1, 3-like 1 (S. cerevisiae)
95	chr10	63023159	63023172	14	*	2.55343e-06	3.71151e-05	0.0054438	-0.00540668	1.7039e-06	0.00264201	3.70164e-05	0.002605	FALSE	Promoter (<=1kb)	chr10	63014664	63023748	9085	-	432467	uc011xfk.1	576	ENSMUSG00000020069	Hnrnph3	heterogeneous nuclear ribonucleoprotein H3
96	chr10	63023178	63023204	27	*	2.55343e-06	3.71151e-05	0.0054438	-0.00540668	2.26088e-10	0.00121914	0.343933	-0.342713	TRUE	Promoter (<=1kb)	chr10	63014664	63023748	9085	-	432467	uc011xfk.1	544	ENSMUSG00000020069	Hnrnph3	heterogeneous nuclear ribonucleoprotein H3
97	chr10	63023206	63023206	1	*	2.55343e-06	3.71151e-05	0.0054438	-0.00540668	6.56663e-06	0.000883306	2.39189e-05	0.000859387	FALSE	Promoter (<=1kb)	chr10	63014664	63023748	9085	-	432467	uc011xfk.1	542	ENSMUSG00000020069	Hnrnph3	heterogeneous nuclear ribonucleoprotein H3
98	chr10	67536973	67537051	79	*	4.07289e-11	0.383433	0.00111879	0.382315	2.24869e-10	0.00123112	0.344192	-0.342961	FALSE	Promoter (<=1kb)	chr10	67537869	67542188	4320	+	13654	uc007flx.1	-896	ENSMUSG00000037868	Egr2	early growth response 2
99	chr10	71238022	71238130	109	*	0.000750362	0.310351	0.0173	0.292847	7.97577e-08	0.0026574	2.71696e-05	0.00263023	TRUE	Promoter (<=1kb)	chr10	71225477	71238044	12568	-	21780	uc007fom.1	0	ENSMUSG00000003923	Tfam	transcription factor A, mitochondrial
100	chr10	75061101	75061118	18	*	4.75998e-06	3.43535e-05	0.00319922	-0.00316487	3.17739e-08	0.0102668	3.39997e-05	0.0102328	FALSE	Promoter (<=1kb)	chr10	75060896	75184923	124028	+	110279	uc007fqb.2	222	ENSMUSG00000009681	Bcr	breakpoint cluster region
101	chr10	75667732	75667749	18	*	2.76911e-08	0.00247135	3.87033e-05	0.00243475	1.83482e-05	0.000102022	0.00426882	-0.0041668	FALSE	Promoter (<=1kb)	chr10	75646110	75667918	21809	-	104248	uc007fqu.1	169	ENSMUSG00000020196	Cabin1	calcineurin binding protein 1
102	chr10	75667910	75667910	1	*	2.76911e-08	0.00247135	3.87033e-05	0.00243475	0.00110436	0.0163383	0.265637	-0.249299	FALSE	Promoter (<=1kb)	chr10	75646110	75667918	21809	-	104248	uc007fqu.1	8	ENSMUSG00000020196	Cabin1	calcineurin binding protein 1
103	chr10	76032784	76032853	70	*	2.09445e-06	0.00349359	4.0232e-05	0.00345336	0.00029984	0.00945359	0.000120753	0.00933284	TRUE	Promoter (<=1kb)	chr10	76032612	76042969	10358	+	64453	uc007ftw.2	241	ENSMUSG00000049764	Zfp280b	zinc finger protein 280B
104	chr10	77259236	77259360	125	*	0.000182834	3.39884e-05	0.000765695	-0.000731371	2.22423e-10	0.00594842	2.8735e-05	0.00591968	FALSE	Promoter (<=1kb)	chr10	77259300	77269586	10287	+	80294	uc007fvj.1	0	ENSMUSG00000020260	Pofut2	protein O-fucosyltransferase 2
105	chr10	78009359	78009464	106	*	2.56082e-07	0.00370396	4.78237e-05	0.0036509	1.67336e-10	0.339858	0.00105379	0.338804	TRUE	Promoter (<=1kb)	chr10	77986949	78009796	22848	-	18641	uc007fwo.2	332	ENSMUSG00000020277	Pfkl	phosphofructokinase, liver, B-type
106	chr10	78352315	78352435	121	*	0.00133913	0.000270208	0.00465779	-0.00438759	7.54095e-10	0.32667	0.00162379	0.325139	FALSE	Promoter (<=1kb)	chr10	78274072	78352442	78371	-	28169	uc007fxr.1	7	ENSMUSG00000001211	Agpat3	1-acylglycerol-3-phosphate O-acyltransferase 3
107	chr10	80148827	80148849	23	*	2.59624e-05	3.07901e-05	0.00133759	-0.0013068	0.000461871	7.15036e-05	0.00182681	-0.00175531	TRUE	Promoter (<=1kb)	chr10	80148272	80158368	10097	+	59090	uc007gca.2	577	ENSMUSG00000035621	Midn	midnolin
108	chr10	80399101	80399443	343	*	0.000525991	7.52558e-05	0.00215326	-0.002078	1.72085e-08	0.333782	0.00346804	0.326255	FALSE	Promoter (<=1kb)	chr10	80392541	80399366	6826	-	17192	uc007gda.1	0	ENSMUSG00000035478	Mbd3	methyl-CpG binding domain protein 3
109	chr10	80399101	80399443	343	*	0.000118287	0.000970906	4.00194e-05	0.000930887	1.72085e-08	0.333782	0.00346804	0.326255	TRUE	Promoter (<=1kb)	chr10	80392541	80399366	6826	-	17192	uc007gda.1	0	ENSMUSG00000035478	Mbd3	methyl-CpG binding domain protein 3
110	chr10	80656289	80656312	24	*	0.00039866	0.000319225	3.01719e-05	0.000289053	2.20925e-05	0.103738	0.00106672	0.102671	TRUE	Promoter (<=1kb)	chr10	80642617	80657071	14455	-	208198	uc011xit.1	759	ENSMUSG00000003344	Btbd2	BTB (POZ) domain containing 2
111	chr10	80799019	80799069	51	*	1.01135e-07	0.383058	0.00403116	0.379027	2.11318e-12	0.345684	0.000602485	0.345082	TRUE	Promoter (<=1kb)	chr10	80798735	80804922	6188	+	20222	uc011xiv.1	334	ENSMUSG00000020211	Sf3a2	splicing factor 3a, subunit 2
112	chr10	80917888	80917953	66	*	1.16753e-07	3.5514e-05	0.00352941	-0.00349389	4.47978e-06	0.00393188	0.28587	-0.280871	TRUE	Promoter (<=1kb)	chr10	80901363	80918245	16883	-	16907	uc007gfk.1	292	ENSMUSG00000062075	Lmnb2	lamin B2
113	chr10	80917888	80917953	66	*	9.17963e-08	0.377446	0.00461431	0.372832	4.47978e-06	0.00393188	0.28587	-0.280871	FALSE	Promoter (<=1kb)	chr10	80901363	80918245	16883	-	16907	uc007gfk.1	292	ENSMUSG00000062075	Lmnb2	lamin B2
114	chr10	81070038	81070075	38	*	1.1191e-06	0.00284631	4.2161e-05	0.00280415	2.17245e-06	0.00623649	6.83455e-05	0.00616814	TRUE	Promoter (<=1kb)	chr10	81070083	81082360	12278	+	50492	uc007gfv.2	-45	ENSMUSG00000004929	Thop1	thimet oligopeptidase 1
115	chr10	81167624	81167706	83	*	7.63648e-05	0.000173792	0.00834851	-0.00814139	6.81591e-09	0.00212007	0.338621	-0.336501	TRUE	Promoter (<=1kb)	chr10	81153966	81167720	13755	-	59004	uc007ggc.3	14	ENSMUSG00000004934	Pias4	protein inhibitor of activated STAT 4
116	chr10	81266735	81266794	60	*	6.35754e-06	0.00353566	4.827e-05	0.00348739	0.000150543	0.0828296	0.00150506	0.0813245	TRUE	Promoter (<=1kb)	chr10	81264722	81266926	2205	-	66047	uc007ggy.1	132	ENSMUSG00000034932	Mrpl54	mitochondrial ribosomal protein L54
117	chr10	81320630	81320644	15	*	3.99513e-44	4.3066e-05	0.0306049	-0.0305535	2.62377e-08	0.00958797	6.78597e-05	0.00952011	FALSE	Promoter (<=1kb)	chr10	81321103	81326251	5149	+	70312	uc007ghf.2	-473	ENSMUSG00000034889	Cactin	cactin, spliceosome C complex subunit
118	chr10	81350013	81350045	33	*	1.92566e-06	0.00335231	3.91416e-05	0.00331317	8.82119e-05	0.0496651	0.000638727	0.0490263	TRUE	Promoter (<=1kb)	chr10	81346046	81350369	4324	-	15353	uc007ghj.2	324	ENSMUSG00000020232	Hmg20b	high mobility group 20B
119	chr10	81350235	81350235	1	*	0.000102296	4.74172e-05	0.00184215	-0.00179083	7.61418e-08	2.41497e-05	0.0020309	-0.00200675	TRUE	Promoter (<=1kb)	chr10	81346046	81350369	4324	-	15353	uc007ghj.2	134	ENSMUSG00000020232	Hmg20b	high mobility group 20B
120	chr10	81350236	81350319	84	*	0.000102296	4.74172e-05	0.00184215	-0.00179083	9.37339e-09	0.342394	0.00222542	0.340168	FALSE	Promoter (<=1kb)	chr10	81346046	81350369	4324	-	15353	uc007ghj.2	50	ENSMUSG00000020232	Hmg20b	high mobility group 20B
121	chr10	81350320	81350322	3	*	0.000102296	4.74172e-05	0.00184215	-0.00179083	1.07088e-08	3.1228e-05	0.00656663	-0.00653542	TRUE	Promoter (<=1kb)	chr10	81346046	81350369	4324	-	15353	uc007ghj.2	47	ENSMUSG00000020232	Hmg20b	high mobility group 20B
122	chr10	81350335	81350335	1	*	0.000102296	4.74172e-05	0.00184215	-0.00179083	7.39174e-06	0.336363	0.00819094	0.328172	FALSE	Promoter (<=1kb)	chr10	81346046	81350369	4324	-	15353	uc007ghj.2	34	ENSMUSG00000020232	Hmg20b	high mobility group 20B
123	chr10	81350341	81350348	8	*	0.000102296	4.74172e-05	0.00184215	-0.00179083	1.97077e-09	3.0373e-05	0.00980116	-0.00977079	TRUE	Promoter (<=1kb)	chr10	81346046	81350369	4324	-	15353	uc007ghj.2	21	ENSMUSG00000020232	Hmg20b	high mobility group 20B
124	chr10	81544703	81544718	16	*	0.000103125	3.0814e-05	0.000827544	-0.00079673	3.05874e-08	0.00362556	0.341741	-0.338099	TRUE	Promoter (<=1kb)	chr10	81528732	81545046	16315	-	14672	uc007gil.1	328	ENSMUSG00000034781	Gna11	guanine nucleotide binding protein, alpha 11
125	chr10	81559392	81559401	10	*	7.24341e-06	0.000630226	3.0551e-05	0.000600161	0.00237416	0.0923824	0.00436468	0.0879374	TRUE	Promoter (<=1kb)	chr10	81559444	81566371	6928	+	14797	uc007gim.2	-52	ENSMUSG00000054452	Aes	amino-terminal enhancer of split
126	chr10	81570860	81570887	28	*	0.000126196	3.58131e-05	0.00159333	-0.00155833	2.54339e-06	0.00413002	6.07807e-05	0.00406941	FALSE	Distal Intergenic	chr10	81575287	81590473	15187	+	21886	uc007gio.2	-4427	ENSMUSG00000034771	Tle2	transducin-like enhancer of split 2, homolog of Drosophila E(spl)
127	chr10	81570921	81571021	101	*	0.000126196	3.58131e-05	0.00159333	-0.00155833	1.35947e-07	0.00406499	0.316223	-0.312158	TRUE	Distal Intergenic	chr10	81575287	81590473	15187	+	21886	uc007gio.2	-4366	ENSMUSG00000034771	Tle2	transducin-like enhancer of split 2, homolog of Drosophila E(spl)
128	chr10	82699001	82699067	67	*	7.01212e-05	0.00408747	9.5896e-05	0.00399158	3.08578e-05	2.61554e-05	0.000988281	-0.000962097	FALSE	Promoter (<=1kb)	chr10	82699007	82741392	42386	+	67933	uc007gjt.1	0	ENSMUSG00000020246	Hcfc2	host cell factor C2
129	chr10	82699315	82699340	26	*	1.39453e-05	3.06689e-05	0.000944387	-0.000913718	2.02552e-08	0.334405	0.00370556	0.330805	FALSE	Promoter (<=1kb)	chr10	82699007	82741392	42386	+	67933	uc007gjt.1	333	ENSMUSG00000020246	Hcfc2	host cell factor C2
130	chr10	82763473	82763584	112	*	9.08331e-05	3.12764e-05	0.000840969	-0.000809693	2.29234e-05	0.00583793	0.270176	-0.264488	TRUE	Promoter (<=1kb)	chr10	82748700	82764141	15442	-	18045	uc007gjv.1	557	ENSMUSG00000020248	Nfyb	nuclear transcription factor-Y beta
131	chr10	82763936	82763976	41	*	4.26983e-07	0.00294348	3.95997e-05	0.0029043	3.02982e-13	0.346332	0.000478976	0.345857	TRUE	Promoter (<=1kb)	chr10	82748700	82764141	15442	-	18045	uc007gjv.1	165	ENSMUSG00000020248	Nfyb	nuclear transcription factor-Y beta
132	chr10	91170729	91170764	36	*	0.00177328	0.00189439	7.97271e-05	0.0017914	3.7099e-12	0.000633853	0.344786	-0.344152	FALSE	Promoter (<=1kb)	chr10	91147571	91170550	22980	-	21917	uc007gtp.2	-179	ENSMUSG00000019961	Tmpo	thymopoietin
133	chr10	91170766	91170786	21	*	0.00177328	0.00189439	7.97271e-05	0.0017914	1.76523e-05	0.000635603	2.3552e-05	0.000612017	TRUE	Promoter (<=1kb)	chr10	91147571	91170550	22980	-	21917	uc007gtp.2	-216	ENSMUSG00000019961	Tmpo	thymopoietin
134	chr10	91170787	91170787	1	*	0.00177328	0.00189439	7.97271e-05	0.0017914	4.80919e-13	0.000505303	0.347069	-0.346564	FALSE	Promoter (<=1kb)	chr10	91147571	91170550	22980	-	21917	uc007gtp.2	-237	ENSMUSG00000019961	Tmpo	thymopoietin
135	chr10	91170800	91170800	1	*	0.00177328	0.00189439	7.97271e-05	0.0017914	4.02786e-05	0.000417727	2.29805e-05	0.000394747	TRUE	Promoter (<=1kb)	chr10	91147571	91170550	22980	-	21917	uc007gtp.2	-250	ENSMUSG00000019961	Tmpo	thymopoietin
136	chr10	91170801	91170805	5	*	0.00177328	0.00189439	7.97271e-05	0.0017914	7.32281e-14	0.000400334	0.347423	-0.347023	FALSE	Promoter (<=1kb)	chr10	91147571	91170550	22980	-	21917	uc007gtp.2	-251	ENSMUSG00000019961	Tmpo	thymopoietin
137	chr10	91170806	91170806	1	*	0.00177328	0.00189439	7.97271e-05	0.0017914	4.54562e-05	0.000383967	2.29248e-05	0.000361042	TRUE	Promoter (<=1kb)	chr10	91147571	91170550	22980	-	21917	uc007gtp.2	-256	ENSMUSG00000019961	Tmpo	thymopoietin
138	chr10	91170814	91170814	1	*	0.00177328	0.00189439	7.97271e-05	0.0017914	1.40851e-14	0.00034375	0.347595	-0.347251	FALSE	Promoter (<=1kb)	chr10	91147571	91170550	22980	-	21917	uc007gtp.2	-264	ENSMUSG00000019961	Tmpo	thymopoietin
139	chr10	91170815	91170816	2	*	0.00177328	0.00189439	7.97271e-05	0.0017914	4.6615e-05	0.00033719	2.28796e-05	0.000314311	TRUE	Promoter (<=1kb)	chr10	91147571	91170550	22980	-	21917	uc007gtp.2	-265	ENSMUSG00000019961	Tmpo	thymopoietin
140	chr10	91171309	91171309	1	*	1.16983e-06	5.11558e-05	0.00513073	-0.00507828	0.000400001	0.00896217	0.000226767	0.0087354	FALSE	Promoter (<=1kb)	chr10	91147571	91171619	24049	-	21917	uc007gtq.2	310	ENSMUSG00000019961	Tmpo	thymopoietin
141	chr10	93160645	93160723	79	*	0.000228661	0.00134771	5.55255e-05	0.00129106	8.90565e-12	0.000696149	0.338862	-0.338166	FALSE	Promoter (<=1kb)	chr10	93160876	93225368	64493	+	237459	uc007guk.2	-231	ENSMUSG00000020015	Cdk17	cyclin-dependent kinase 17
142	chr10	93310329	93310341	13	*	0.00010641	0.0010772	4.40168e-05	0.00104481	0.00017826	0.00220278	0.12047	-0.118268	FALSE	Promoter (<=1kb)	chr10	93247416	93311159	63744	-	13713	uc011xlt.1	818	ENSMUSG00000008398	Elk3	ELK3, member of ETS oncogene family
143	chr10	93310415	93310416	2	*	0.00010641	0.0010772	4.40168e-05	0.00104481	0.000991805	0.0024375	0.000105122	0.00233238	TRUE	Promoter (<=1kb)	chr10	93247416	93311159	63744	-	13713	uc011xlt.1	743	ENSMUSG00000008398	Elk3	ELK3, member of ETS oncogene family
144	chr10	94148155	94148179	25	*	1.28788e-07	3.53199e-05	0.0030463	-0.00301084	0.000343074	0.251701	0.00734195	0.244359	FALSE	Promoter (<=1kb)	chr10	94147931	94197214	49284	+	22025	uc007gvo.2	248	ENSMUSG00000005897	Nr2c1	nuclear receptor subfamily 2, group C, member 1
145	chr10	95416677	95416682	6	*	3.48444e-08	0.00304278	3.79737e-05	0.0030048	8.12196e-07	0.342786	0.0062764	0.336526	TRUE	Promoter (<=1kb)	chr10	95411490	95416857	5368	-	216233	uc007gwg.2	175	ENSMUSG00000020027	Socs2	suppressor of cytokine signaling 2
146	chr10	96617343	96617377	35	*	1.19204e-07	3.03833e-05	0.00221215	-0.00218176	1.07851e-09	0.00796712	3.66725e-05	0.00793045	FALSE	Promoter (<=1kb)	chr10	96617001	96622811	5811	+	12226	uc007gww.2	376	ENSMUSG00000036478	Btg1	B cell translocation gene 1, anti-proliferative
147	chr10	96617343	96617377	35	*	1.01887e-11	0.385344	0.00124367	0.3841	1.07851e-09	0.00796712	3.66725e-05	0.00793045	TRUE	Promoter (<=1kb)	chr10	96617001	96622811	5811	+	12226	uc007gww.2	376	ENSMUSG00000036478	Btg1	B cell translocation gene 1, anti-proliferative
148	chr10	98914089	98914099	11	*	3.5811e-08	0.194035	0.000131044	0.193678	7.9398e-05	2.30941e-05	0.000362195	-0.000339101	FALSE	Promoter (1-2kb)	chr10	98915152	99026143	110992	+	67972	uc007gxf.2	-1063	ENSMUSG00000019943	Atp2b1	ATPase, Ca++ transporting, plasma membrane 1
149	chr10	98914456	98914479	24	*	2.7364e-07	2.9706e-05	0.00134229	-0.00131259	2.52469e-05	0.00048941	2.31916e-05	0.000466218	FALSE	Promoter (<=1kb)	chr10	98915152	99026143	110992	+	67972	uc007gxf.2	-696	ENSMUSG00000019943	Atp2b1	ATPase, Ca++ transporting, plasma membrane 1
150	chr10	98914482	98914482	1	*	2.7364e-07	2.9706e-05	0.00134229	-0.00131259	5.60556e-11	0.00101456	0.344368	-0.343353	TRUE	Promoter (<=1kb)	chr10	98915152	99026143	110992	+	67972	uc007gxf.2	-670	ENSMUSG00000019943	Atp2b1	ATPase, Ca++ transporting, plasma membrane 1
151	chr10	98915469	98915521	53	*	1.37882e-13	0.385165	0.000506846	0.384659	1.0549e-09	0.00299917	2.37686e-05	0.00297567	TRUE	Promoter (<=1kb)	chr10	98915152	99026143	110992	+	67972	uc007gxf.2	369	ENSMUSG00000019943	Atp2b1	ATPase, Ca++ transporting, plasma membrane 1
152	chr10	99261549	99261575	27	*	3.56818e-07	3.06413e-05	0.00159789	-0.00156705	0.000382453	0.000115215	0.00427252	-0.0041573	TRUE	Promoter (1-2kb)	chr10	99263231	99267489	4259	+	67603	uc007gxk.2	-1682	ENSMUSG00000019960	Dusp6	dual specificity phosphatase 6
153	chr10	99261665	99261773	109	*	3.56818e-07	3.06413e-05	0.00159789	-0.00156705	1.44736e-08	0.0246634	5.91637e-05	0.0246117	FALSE	Promoter (1-2kb)	chr10	99263231	99267489	4259	+	67603	uc007gxk.2	-1566	ENSMUSG00000019960	Dusp6	dual specificity phosphatase 6
154	chr10	99262771	99262782	12	*	1.21559e-07	0.375993	0.00351197	0.372481	2.25479e-05	0.0171913	0.00032876	0.0168625	TRUE	Promoter (<=1kb)	chr10	99263231	99267489	4259	+	67603	uc007gxk.2	-460	ENSMUSG00000019960	Dusp6	dual specificity phosphatase 6
155	chr10	105574004	105574077	74	*	7.71682e-09	3.93917e-05	0.00370963	-0.00367058	2.59496e-08	0.003564	0.341805	-0.338241	TRUE	Promoter (<=1kb)	chr10	105187664	105574479	386816	-	278279	uc007gym.1	402	ENSMUSG00000036019	Tmtc2	transmembrane and tetratricopeptide repeat containing 2
156	chr10	108162721	108162773	53	*	5.2393e-15	0.384847	0.000342739	0.384504	1.51363e-10	0.336645	0.00103893	0.335606	TRUE	Promoter (<=1kb)	chr10	108162400	108277575	115176	+	17931	uc007gzc.1	373	ENSMUSG00000019907	Ppp1r12a	protein phosphatase 1, regulatory (inhibitor) subunit 12A
157	chr10	111506645	111506750	106	*	1.1295e-05	0.000849036	3.27607e-05	0.00081808	6.1651e-05	0.000389405	2.31435e-05	0.000366262	TRUE	Promoter (<=1kb)	chr10	111506286	111508649	2364	+	21664	uc007haf.2	464	ENSMUSG00000020205	Phlda1	pleckstrin homology-like domain, family A, member 1
158	chr10	118868182	118868295	114	*	1.88614e-05	0.00208868	5.29123e-05	0.00203577	1.47555e-12	0.000630094	0.344733	-0.344149	FALSE	Promoter (<=1kb)	chr10	118859349	118868903	9555	-	69181	uc007hea.1	608	ENSMUSG00000028630	Dyrk2	dual-specificity tyrosine-(Y)-phosphorylation regulated kinase 2
159	chr10	119239445	119239495	51	*	0.00171475	0.00516494	0.173214	-0.168049	0.000872455	0.2505	0.011503	0.238072	FALSE	Promoter (<=1kb)	chr10	119198812	119240055	41244	-	71902	uc007hec.2	560	ENSMUSG00000020114	Cand1	cullin associated and neddylation disassociated 1
160	chr10	119239700	119239715	16	*	7.47889e-12	3.73537e-05	0.00997853	-0.009942	3.67916e-06	0.00139155	3.5234e-05	0.00135632	FALSE	Promoter (<=1kb)	chr10	119198812	119240055	41244	-	71902	uc007hec.2	340	ENSMUSG00000020114	Cand1	cullin associated and neddylation disassociated 1
161	chr10	121625940	121625991	52	*	7.85455e-09	0.00732997	4.69403e-05	0.00728303	1.21309e-05	0.00572077	0.000106079	0.00561469	TRUE	Promoter (<=1kb)	chr10	121587380	121626316	38937	-	73192	uc007hfv.1	325	ENSMUSG00000034667	Xpot	exportin, tRNA (nuclear export receptor for tRNAs)
162	chr10	121626198	121626198	1	*	0.000336504	5.87322e-05	0.0019419	-0.00188317	0.00732631	0.00275863	0.0489124	-0.0461538	TRUE	Promoter (<=1kb)	chr10	121587380	121626316	38937	-	73192	uc007hfv.1	118	ENSMUSG00000034667	Xpot	exportin, tRNA (nuclear export receptor for tRNAs)
163	chr10	126978606	126978827	222	*	0.000446056	0.00469685	0.176007	-0.17131	3.07524e-07	0.00302066	0.320316	-0.315222	TRUE	Promoter (<=1kb)	chr10	126978717	126999975	21259	+	52468	uc007hhj.2	0	ENSMUSG00000078429	Ctdsp2	CTD (carboxy-terminal domain, RNA polymerase II, polypeptide A) small phosphatase 2
164	chr10	126978606	126978827	222	*	9.6792e-08	0.00183205	3.50017e-05	0.00179705	3.07524e-07	0.00302066	0.320316	-0.315222	FALSE	Promoter (<=1kb)	chr10	126978717	126999975	21259	+	52468	uc007hhj.2	0	ENSMUSG00000078429	Ctdsp2	CTD (carboxy-terminal domain, RNA polymerase II, polypeptide A) small phosphatase 2
165	chr10	126979178	126979219	42	*	7.97344e-07	0.00135039	3.13608e-05	0.00131903	2.78984e-07	0.00469273	0.342927	-0.338234	FALSE	Promoter (<=1kb)	chr10	126978717	126999975	21259	+	52468	uc007hhj.2	502	ENSMUSG00000078429	Ctdsp2	CTD (carboxy-terminal domain, RNA polymerase II, polypeptide A) small phosphatase 2
166	chr10	126979333	126979408	76	*	1.11713e-08	0.376025	0.00320491	0.372821	6.61222e-06	0.310648	0.00610318	0.304409	TRUE	Promoter (<=1kb)	chr10	126978717	126999975	21259	+	52468	uc007hhj.2	691	ENSMUSG00000078429	Ctdsp2	CTD (carboxy-terminal domain, RNA polymerase II, polypeptide A) small phosphatase 2
167	chr10	127739362	127739402	41	*	6.35784e-05	0.000550725	0.0570633	-0.0565126	7.95644e-05	3.60368e-05	0.000992986	-0.000956124	TRUE	Promoter (<=1kb)	chr10	127739538	127747339	7802	+	320080	uc007hkl.1	-176	ENSMUSG00000044617	Zbtb39	zinc finger and BTB domain containing 39
168	chr10	128058765	128058767	3	*	2.38204e-10	0.0111945	4.19426e-05	0.0111355	1.4793e-11	0.345883	0.00083239	0.345051	TRUE	Promoter (<=1kb)	chr10	128058982	128077254	18273	+	56351	uc007hld.1	-217	ENSMUSG00000071072	Ptges3	prostaglandin E synthase 3 (cytosolic)
169	chr10	128059278	128059398	121	*	7.73957e-15	0.385098	0.000371705	0.384726	6.29003e-12	0.342505	0.000780858	0.34189	TRUE	Promoter (<=1kb)	chr10	128058982	128077254	18273	+	56351	uc007hld.1	416	ENSMUSG00000071072	Ptges3	prostaglandin E synthase 3 (cytosolic)
170	chr10	128232187	128232307	121	*	2.94196e-12	3.79442e-05	0.0100751	-0.0100426	3.70948e-09	0.0138267	5.56799e-05	0.0137711	FALSE	Promoter (<=1kb)	chr10	128232063	128244829	12767	+	21853	uc007hlt.2	244	ENSMUSG00000039994	Timeless	timeless circadian clock 1
171	chr10	128891476	128891516	41	*	1.74617e-06	0.00180114	3.9311e-05	0.00176183	0.000542943	0.00900373	0.209578	-0.200374	FALSE	Promoter (<=1kb)	chr10	128884546	128891718	7173	-	14561	uc007hot.1	202	ENSMUSG00000025352	Gdf11	growth differentiation factor 11
172	chr11	3202637	3202637	1	*	0.000142059	0.000957029	4.14553e-05	0.000915573	3.78221e-06	0.00642777	0.31304	-0.306612	FALSE	Promoter (<=1kb)	chr11	3202583	3220678	18096	+	74203	uc007hsd.2	54	ENSMUSG00000020454	Eif4enif1	eukaryotic translation initiation factor 4E nuclear import factor 1
173	chr11	3202644	3202653	10	*	0.000142059	0.000957029	4.14553e-05	0.000915573	5.13217e-09	0.00489636	3.52763e-05	0.00486108	TRUE	Promoter (<=1kb)	chr11	3202583	3220678	18096	+	74203	uc007hsd.2	70	ENSMUSG00000020454	Eif4enif1	eukaryotic translation initiation factor 4E nuclear import factor 1
174	chr11	3202672	3202676	5	*	0.000142059	0.000957029	4.14553e-05	0.000915573	5.95558e-08	0.00395399	0.342106	-0.338152	FALSE	Promoter (<=1kb)	chr11	3202583	3220678	18096	+	74203	uc007hsd.2	93	ENSMUSG00000020454	Eif4enif1	eukaryotic translation initiation factor 4E nuclear import factor 1
175	chr11	3202677	3202677	1	*	0.000142059	0.000957029	4.14553e-05	0.000915573	2.5928e-10	0.00385737	2.61004e-05	0.00383127	TRUE	Promoter (<=1kb)	chr11	3202583	3220678	18096	+	74203	uc007hsd.2	94	ENSMUSG00000020454	Eif4enif1	eukaryotic translation initiation factor 4E nuclear import factor 1
176	chr11	3202696	3202702	7	*	0.000142059	0.000957029	4.14553e-05	0.000915573	4.22326e-09	0.00266184	0.346172	-0.34351	FALSE	Promoter (<=1kb)	chr11	3202583	3220678	18096	+	74203	uc007hsd.2	119	ENSMUSG00000020454	Eif4enif1	eukaryotic translation initiation factor 4E nuclear import factor 1
177	chr11	3266195	3266286	92	*	7.43013e-08	0.365756	0.00309691	0.362659	3.7017e-12	0.345113	0.00070199	0.344411	TRUE	Promoter (<=1kb)	chr11	3249922	3266386	16465	-	13494	uc007hsh.1	100	ENSMUSG00000020457	Drg1	developmentally regulated GTP binding protein 1
178	chr11	3266195	3266286	92	*	0.000557243	3.03918e-05	0.000464761	-0.00043437	3.7017e-12	0.345113	0.00070199	0.344411	FALSE	Promoter (<=1kb)	chr11	3249922	3266386	16465	-	13494	uc007hsh.1	100	ENSMUSG00000020457	Drg1	developmentally regulated GTP binding protein 1
179	chr11	3408778	3408889	112	*	3.27101e-05	3.31608e-05	0.00120161	-0.00116801	5.60049e-07	4.35201e-05	0.00271125	-0.00267003	TRUE	Promoter (<=1kb)	chr11	3343297	3409238	65942	-	16886	uc007hsu.2	349	ENSMUSG00000020451	Limk2	LIM motif-containing protein kinase 2
180	chr11	4160438	4160510	73	*	9.8918e-11	0.0058934	4.04663e-05	0.00585164	9.49879e-06	4.44248e-05	0.00136663	-0.00132221	FALSE	Promoter (<=1kb)	chr11	4160354	4171913	11560	+	67465	uc007huo.2	156	ENSMUSG00000002129	Sf3a1	splicing factor 3a, subunit 1
181	chr11	4594402	4594439	38	*	0.000530158	3.63416e-05	0.000663117	-0.000626327	2.2481e-07	0.000939965	2.3054e-05	0.000916911	FALSE	Promoter (<=1kb)	chr11	4480868	4594815	113948	-	74302	uc007hux.1	376	ENSMUSG00000034354	Mtmr3	myotubularin related protein 3
182	chr11	5520542	5520542	1	*	2.87961e-05	0.000843461	3.38539e-05	0.000809607	1.00351e-07	0.00193969	3.93252e-05	0.00190037	TRUE	Promoter (<=1kb)	chr11	5520641	5525993	5353	+	22433	uc007hwm.2	-99	ENSMUSG00000020484	Xbp1	X-box binding protein 1
183	chr11	5520923	5520944	22	*	2.44583e-10	0.37814	0.00142657	0.376713	4.13717e-07	2.36177e-05	0.0018919	-0.00186829	FALSE	Promoter (<=1kb)	chr11	5520641	5525993	5353	+	22433	uc007hwm.2	303	ENSMUSG00000020484	Xbp1	X-box binding protein 1
184	chr11	20332829	20332928	100	*	0.000745855	0.000439624	0.0149842	-0.0145446	8.69306e-06	0.275839	0.00604606	0.269607	FALSE	Promoter (<=1kb)	chr11	20302180	20332713	30534	-	55963	uc007idb.2	-116	ENSMUSG00000020142	Slc1a4	solute carrier family 1 (glutamate/neutral amino acid transporter), member 4
185	chr11	20741070	20741200	131	*	4.07243e-12	0.383961	0.000527538	0.383186	1.34825e-07	0.31843	0.00360468	0.314825	TRUE	Promoter (<=1kb)	chr11	20685085	20741556	56472	-	216549	uc007idh.3	356	ENSMUSG00000049659	Aftph	aftiphilin
186	chr11	21091687	21091983	297	*	5.67608e-05	0.00052493	2.96813e-05	0.000495354	5.24752e-09	0.342557	0.00261388	0.340144	TRUE	Promoter (<=1kb)	chr11	21092118	21149402	57285	+	67245	uc007idm.1	-431	ENSMUSG00000020134	Peli1	pellino 1
187	chr11	21091687	21091983	297	*	2.94635e-05	2.99261e-05	0.00109008	-0.00106015	5.24752e-09	0.342557	0.00261388	0.340144	FALSE	Promoter (<=1kb)	chr11	21092118	21149402	57285	+	67245	uc007idm.1	-431	ENSMUSG00000020134	Peli1	pellino 1
188	chr11	23067808	23067849	42	*	2.64604e-12	0.383911	0.000767718	0.383201	8.522e-13	0.341502	0.000596001	0.340906	TRUE	Distal Intergenic	chr11	23020000	23030788	10789	+	73873	uc007ies.1	47849	ENSMUSG00000049811	Fam161a	family with sequence similarity 161, member A
189	chr11	23665591	23665761	171	*	3.61418e-05	3.07451e-05	0.000884144	-0.000853374	3.83017e-07	0.322749	0.00330003	0.320524	FALSE	Promoter (<=1kb)	chr11	23665674	23732876	67203	+	74467	uc007ifk.1	0	ENSMUSG00000020280	Pus10	pseudouridylate synthase 10
190	chr11	29526390	29526462	73	*	7.45317e-09	0.377258	0.00249217	0.374921	3.93623e-09	0.33348	0.00176604	0.331714	TRUE	Promoter (<=1kb)	chr11	29526397	29545447	19051	+	76784	uc007ihc.2	0	ENSMUSG00000020459	Mtif2	mitochondrial translational initiation factor 2
191	chr11	30267669	30267669	1	*	0.0001378	0.0013496	5.06179e-05	0.00129899	4.46402e-08	2.47267e-05	0.00215569	-0.00213097	FALSE	Intron (uc007ihu.1/uc007ihu.1, intron 1 of 1)	chr11	30099395	30219772	120378	-	20742	uc007ihs.1	-47897	ENSMUSG00000020315	Sptbn1	spectrin beta, non-erythrocytic 1
192	chr11	30267677	30267718	42	*	0.0001378	0.0013496	5.06179e-05	0.00129899	4.43261e-08	0.340887	0.0032438	0.337643	TRUE	Intron (uc007ihu.1/uc007ihu.1, intron 1 of 1)	chr11	30099395	30219772	120378	-	20742	uc007ihs.1	-47905	ENSMUSG00000020315	Sptbn1	spectrin beta, non-erythrocytic 1
193	chr11	30267728	30267729	2	*	0.0001378	0.0013496	5.06179e-05	0.00129899	4.25149e-08	3.2015e-05	0.00452309	-0.00449107	FALSE	Intron (uc007ihu.1/uc007ihu.1, intron 1 of 1)	chr11	30099395	30219772	120378	-	20742	uc007ihs.1	-47956	ENSMUSG00000020315	Sptbn1	spectrin beta, non-erythrocytic 1
194	chr11	30267733	30267757	25	*	0.0001378	0.0013496	5.06179e-05	0.00129899	3.50632e-07	0.335913	0.00448597	0.33143	TRUE	Intron (uc007ihu.1/uc007ihu.1, intron 1 of 1)	chr11	30099395	30219772	120378	-	20742	uc007ihs.1	-47961	ENSMUSG00000020315	Sptbn1	spectrin beta, non-erythrocytic 1
195	chr11	30267758	30267758	1	*	0.0001378	0.0013496	5.06179e-05	0.00129899	2.97557e-08	3.05307e-05	0.0044826	-0.00445207	FALSE	Intron (uc007ihu.1/uc007ihu.1, intron 1 of 1)	chr11	30099395	30219772	120378	-	20742	uc007ihs.1	-47986	ENSMUSG00000020315	Sptbn1	spectrin beta, non-erythrocytic 1
196	chr11	30267763	30267768	6	*	0.0001378	0.0013496	5.06179e-05	0.00129899	2.44927e-07	0.338228	0.0042993	0.333929	TRUE	Intron (uc007ihu.1/uc007ihu.1, intron 1 of 1)	chr11	30099395	30219772	120378	-	20742	uc007ihs.1	-47991	ENSMUSG00000020315	Sptbn1	spectrin beta, non-erythrocytic 1
197	chr11	31671826	31671869	44	*	4.44626e-05	0.000592294	2.98581e-05	0.000562387	2.91914e-05	0.00316047	7.64675e-05	0.003084	TRUE	Promoter (<=1kb)	chr11	31665150	31671862	6713	-	69556	uc007iim.1	0	ENSMUSG00000044502	Bod1	biorientation of chromosomes in cell division 1
198	chr11	40734100	40734118	19	*	1.07081e-05	3.77461e-05	0.00300279	-0.00296507	0.000274128	0.19247	0.00657085	0.185899	FALSE	Promoter (<=1kb)	chr11	40733661	40740046	6386	+	52653	uc007ily.3	457	ENSMUSG00000020328	Nudcd2	NudC domain containing 2
199	chr11	45944708	45944874	167	*	7.96535e-05	3.11174e-05	0.000884948	-0.000853831	9.20718e-08	0.302091	0.00294872	0.299143	FALSE	Promoter (<=1kb)	chr11	45928269	45944935	16667	-	72290	uc007ins.1	61	ENSMUSG00000044847	Lsm11	U7 snRNP-specific Sm-like protein LSM11
200	chr11	49244140	49244230	91	*	1.53668e-05	0.00356569	5.64169e-05	0.00350927	4.09797e-05	0.00102218	2.96931e-05	0.000992485	TRUE	Promoter (<=1kb)	chr11	49244191	49263024	18834	+	17308	uc007iqb.2	0	ENSMUSG00000020346	Mgat1	mannoside acetylglucosaminyltransferase 1
201	chr11	51605956	51606006	51	*	1.21907e-05	0.00121205	3.87711e-05	0.00117328	0.000319431	0.00644085	0.197664	-0.191224	FALSE	Promoter (<=1kb)	chr11	51600100	51606881	6782	-	15384	uc007itz.1	875	ENSMUSG00000020358	Hnrnpab	heterogeneous nuclear ribonucleoprotein A/B
202	chr11	54955895	54956044	150	*	7.65193e-08	0.3853	0.00524433	0.380056	6.63852e-09	0.338916	0.00204394	0.336799	TRUE	Promoter (<=1kb)	chr11	54916796	54956178	39383	-	57783	uc007iyq.3	134	ENSMUSG00000020400	Tnip1	TNFAIP3 interacting protein 1
203	chr11	54955895	54956044	150	*	2.21146e-05	3.45155e-05	0.00215441	-0.00211768	6.63852e-09	0.338916	0.00204394	0.336799	FALSE	Promoter (<=1kb)	chr11	54916796	54956178	39383	-	57783	uc007iyq.3	134	ENSMUSG00000020400	Tnip1	TNFAIP3 interacting protein 1
204	chr11	55098023	55098071	49	*	2.86603e-08	0.382845	0.00538735	0.377458	0.000503517	0.000324099	2.80207e-05	0.000296078	TRUE	Promoter (<=1kb)	chr11	55097985	55113028	15044	+	14667	uc007iyw.2	86	ENSMUSG00000000594	Gm2a	GM2 ganglioside activator protein
205	chr11	58104092	58104183	92	*	0.000115284	3.28717e-05	0.000825881	-0.000793152	1.88194e-07	0.317926	0.00393489	0.313991	FALSE	Promoter (<=1kb)	chr11	58104153	58118594	14442	+	69125	uc007jaj.1	0	ENSMUSG00000020515	Cnot8	CCR4-NOT transcription complex, subunit 8
206	chr11	58960056	58960084	29	*	1.94651e-05	3.25296e-05	0.00161763	-0.00158595	9.55784e-05	0.000621466	0.0199446	-0.0193231	TRUE	Intron (uc007jcu.1/56631, intron 1 of 6)	chr11	58963781	58971729	7949	+	56631	uc007jcv.1	-3725	ENSMUSG00000036964	Trim17	tripartite motif-containing 17
207	chr11	59163684	59163769	86	*	1.61044e-06	3.07576e-05	0.000954698	-0.000923941	9.64986e-11	0.00105584	0.341475	-0.340419	TRUE	Promoter (<=1kb)	chr11	59155369	59163745	8377	-	216792	uc007jdd.2	0	ENSMUSG00000049287	Iba57	IBA57, iron-sulfur cluster assembly homolog (S. cerevisiae)
208	chr11	59506264	59506418	155	*	0.000159059	0.00101113	4.11854e-05	0.000969949	1.98997e-10	0.340458	0.0012664	0.339301	TRUE	Promoter (<=1kb)	chr11	59485521	59506640	21120	-	268417	uc007jea.2	222	ENSMUSG00000020472	Zkscan17	zinc finger with KRAB and SCAN domains 17
209	chr11	59506446	59506525	80	*	0.000431238	4.8646e-05	0.00118594	-0.00113729	2.37959e-08	2.43494e-05	0.00264982	-0.00262547	TRUE	Promoter (<=1kb)	chr11	59485521	59506640	21120	-	268417	uc007jea.2	115	ENSMUSG00000020472	Zkscan17	zinc finger with KRAB and SCAN domains 17
210	chr11	62457524	62457676	153	*	7.44777e-07	0.328939	0.00463448	0.324305	6.01905e-06	2.52295e-05	0.000985883	-0.000960653	FALSE	Promoter (<=1kb)	chr11	62384783	62457806	73024	-	20185	uc007jjb.1	130	ENSMUSG00000018501	Ncor1	nuclear receptor co-repressor 1
211	chr11	63132603	63132681	79	*	1.63445e-05	0.00170176	3.96999e-05	0.00166206	2.75631e-05	3.12647e-05	0.000979097	-0.000947832	FALSE	Promoter (<=1kb)	chr11	63132569	63159547	26979	+	18858	uc056ylm.1	112	ENSMUSG00000018217	Pmp22	peripheral myelin protein 22
212	chr11	65788050	65788127	78	*	3.13342e-05	0.00112189	3.38389e-05	0.00108805	2.44432e-07	0.00461048	0.387877	-0.383266	FALSE	Promoter (<=1kb)	chr11	65688244	65788297	100054	-	26398	uc007jlb.1	170	ENSMUSG00000033352	Map2k4	mitogen-activated protein kinase kinase 4
213	chr11	68853042	68853114	73	*	7.55852e-13	0.382669	0.00066714	0.382059	2.04209e-06	0.319383	0.00603841	0.313346	TRUE	Promoter (<=1kb)	chr11	68821446	68853131	31686	-	83431	uc007joc.3	17	ENSMUSG00000018736	Ndel1	nuclear distribution gene E-like homolog 1 (A. nidulans)
214	chr11	69579033	69579045	13	*	1.69345e-05	3.76345e-05	0.00246712	-0.0024295	3.7419e-05	0.000652897	2.65298e-05	0.000626367	FALSE	Promoter (<=1kb)	chr11	69561754	69579324	17571	-	216853	uc007jqj.1	279	ENSMUSG00000041346	Wrap53	WD repeat containing, antisense to Trp53
215	chr11	69579070	69579071	2	*	1.69345e-05	3.76345e-05	0.00246712	-0.0024295	4.07738e-07	0.00308196	0.299437	-0.296355	TRUE	Promoter (<=1kb)	chr11	69561754	69579324	17571	-	216853	uc007jqj.1	253	ENSMUSG00000041346	Wrap53	WD repeat containing, antisense to Trp53
216	chr11	69671623	69671623	1	*	3.91456e-07	0.380896	0.00583981	0.375056	0.0043509	0.236718	0.0184768	0.218241	TRUE	Promoter (<=1kb)	chr11	69666936	69672423	5488	-	13681	uc007jqz.2	800	ENSMUSG00000059796	Eif4a1	eukaryotic translation initiation factor 4A1
217	chr11	69671665	69671758	94	*	0.00516766	0.00735113	0.142426	-0.135075	6.17313e-05	0.00281468	0.146386	-0.143572	TRUE	Promoter (<=1kb)	chr11	69666936	69672423	5488	-	13681	uc007jqz.2	665	ENSMUSG00000059796	Eif4a1	eukaryotic translation initiation factor 4A1
218	chr11	69881012	69881165	154	*	0.000150023	0.000935857	2.99231e-05	0.000905934	6.4042e-06	2.34478e-05	0.000748087	-0.000724726	FALSE	Promoter (<=1kb)	chr11	69878264	69880985	2722	-	216858	uc007jsd.2	-27	ENSMUSG00000046731	Kctd11	potassium channel tetramerisation domain containing 11
219	chr11	69980871	69980942	72	*	3.24025e-05	0.285289	0.00599448	0.279294	0.000122263	0.00790732	0.25928	-0.251373	FALSE	Promoter (<=1kb)	chr11	69981168	69990600	9433	+	67181	uc007jtf.1	-297	ENSMUSG00000018559	Ctdnep1	CTD nuclear envelope phosphatase 1
220	chr11	69997320	69997499	180	*	1.25914e-07	0.378636	0.00481517	0.373821	1.41852e-06	0.00415654	3.90119e-05	0.00411769	TRUE	Promoter (<=1kb)	chr11	69997462	70000011	2550	+	78246	uc007jtk.2	0	ENSMUSG00000018572	Phf23	PHD finger protein 23
221	chr11	72608269	72608317	49	*	2.35706e-07	0.00252277	3.36403e-05	0.00248938	2.26381e-09	0.00178564	0.340607	-0.338822	FALSE	Promoter (1-2kb)	chr11	72607261	72680140	72880	+	67128	uc007jzc.1	1056	ENSMUSG00000020794	Ube2g1	ubiquitin-conjugating enzyme E2G 1
222	chr11	72690120	72690322	203	*	9.31707e-07	5.88912e-05	0.0165955	-0.0165366	1.93679e-07	0.00499043	0.34208	-0.337425	TRUE	Promoter (<=1kb)	chr11	72690002	72725180	35179	+	11736	uc007jzg.1	320	ENSMUSG00000020790	Ankfy1	ankyrin repeat and FYVE domain containing 1
223	chr11	75462485	75462571	87	*	0.000109448	9.48614e-05	0.0045255	-0.00443064	1.68005e-06	0.00212345	3.79642e-05	0.00208549	FALSE	Promoter (1-2kb)	chr11	75461539	75466690	5152	+	100042498	uc007kdv.1	1032	ENSMUSG00000085148	Mir22hg	Mir22 host gene (non-protein coding)
224	chr11	76623454	76623569	116	*	5.55212e-05	3.15455e-05	0.00112052	-0.00108884	1.58787e-09	0.00139794	0.345465	-0.344067	TRUE	Distal Intergenic	chr11	76416732	76577739	161008	-	109934	uc007kfu.2	-45715	ENSMUSG00000017631	Abr	active BCR-related gene
225	chr11	79146478	79146478	1	*	8.65515e-09	0.383458	0.00259157	0.380867	2.29355e-07	0.343623	0.00411829	0.339505	TRUE	Promoter (<=1kb)	chr11	79014801	79146354	131554	-	16706	uc033fyo.1	-124	ENSMUSG00000018334	Ksr1	kinase suppressor of ras 1
226	chr11	79146481	79146481	1	*	8.65515e-09	0.383458	0.00259157	0.380867	8.52541e-08	2.56718e-05	0.00421856	-0.00419289	FALSE	Promoter (<=1kb)	chr11	79014801	79146354	131554	-	16706	uc033fyo.1	-127	ENSMUSG00000018334	Ksr1	kinase suppressor of ras 1
227	chr11	79146507	79146520	14	*	8.65515e-09	0.383458	0.00259157	0.380867	8.2998e-07	0.338967	0.00491091	0.334056	TRUE	Promoter (<=1kb)	chr11	79014801	79146354	131554	-	16706	uc033fyo.1	-153	ENSMUSG00000018334	Ksr1	kinase suppressor of ras 1
228	chr11	80477303	80477330	28	*	1.689e-07	0.372329	0.00489373	0.367435	5.96846e-07	0.00336678	0.358887	-0.3545	FALSE	Promoter (<=1kb)	chr11	80477046	80481179	4134	+	12569	uc011yat.1	284	ENSMUSG00000048895	Cdk5r1	cyclin-dependent kinase 5, regulatory subunit 1 (p35)
229	chr11	80477303	80477330	28	*	0.000703975	0.00187328	0.131369	-0.128267	5.96846e-07	0.00336678	0.358887	-0.3545	TRUE	Promoter (<=1kb)	chr11	80477046	80481179	4134	+	12569	uc011yat.1	284	ENSMUSG00000048895	Cdk5r1	cyclin-dependent kinase 5, regulatory subunit 1 (p35)
230	chr11	82870470	82870471	2	*	1.03963e-09	0.378338	0.00227802	0.37606	0.00122258	8.60582e-05	0.00147806	-0.00139201	FALSE	Promoter (<=1kb)	chr11	82803819	82870744	66926	-	67338	uc007kni.2	273	ENSMUSG00000020696	Rffl	ring finger and FYVE like domain containing protein
231	chr11	83473344	83473524	181	*	1.91757e-07	3.53197e-05	0.00439464	-0.00436109	7.72184e-07	0.00398475	3.40674e-05	0.00395439	FALSE	Promoter (<=1kb)	chr11	83473108	83489213	16106	+	70439	uc007kpe.1	416	ENSMUSG00000020680	Taf15	TAF15 RNA polymerase II, TATA box binding protein (TBP)-associated factor
232	chr11	83753767	83753890	124	*	5.36716e-08	0.00208196	3.6126e-05	0.00204584	2.838e-11	0.332645	0.000596454	0.33162	TRUE	Promoter (<=1kb)	chr11	83753712	83783754	30043	+	217026	uc007kpv.1	178	ENSMUSG00000000976	Heatr6	HEAT repeat containing 6
233	chr11	84869787	84869888	102	*	6.49981e-06	0.344755	0.00623384	0.338353	2.30385e-05	0.00536571	0.293556	-0.288146	FALSE	Promoter (<=1kb)	chr11	84870005	84871631	1627	+	102635561	uc033fyy.2	-218	#N/A	Ggnbp2os	gametogenetin binding protein 2, opposite strand
234	chr11	84870685	84870745	61	*	4.61783e-05	0.0023636	5.75911e-05	0.00229944	6.50202e-11	0.001028	0.338121	-0.337161	FALSE	Promoter (<=1kb)	chr11	84832361	84870738	38378	-	217039	uc007kqv.1	0	ENSMUSG00000020530	Ggnbp2	gametogenetin binding protein 2
235	chr11	84870949	84870966	18	*	4.61783e-05	0.0023636	5.75911e-05	0.00229944	5.15947e-08	0.00451425	3.49732e-05	0.00447928	TRUE	Promoter (<=1kb)	chr11	84870923	84871631	709	+	102635561	uc056yno.1	43	#N/A	Ggnbp2os	gametogenetin binding protein 2, opposite strand
236	chr11	84880338	84880393	56	*	0.000301433	3.05612e-05	0.000643051	-0.00061249	1.67077e-08	0.301567	0.00195122	0.299616	FALSE	Promoter (<=1kb)	chr11	84876313	84880285	3973	-	70325	uc007kqz.1	-53	ENSMUSG00000045140	Pigw	phosphatidylinositol glycan anchor biosynthesis, class W
237	chr11	84880397	84880397	1	*	0.000301433	3.05612e-05	0.000643051	-0.00061249	0.000844444	0.000153327	0.0029071	-0.00275377	TRUE	Promoter (<=1kb)	chr11	84876313	84880285	3973	-	70325	uc007kqz.1	-112	ENSMUSG00000045140	Pigw	phosphatidylinositol glycan anchor biosynthesis, class W
238	chr11	85832961	85832963	3	*	7.29318e-07	0.00359114	5.60342e-05	0.00353511	1.76142e-08	0.343317	0.00253476	0.340782	TRUE	Promoter (<=1kb)	chr11	85832615	85841948	9334	+	21385	uc007ksb.1	348	ENSMUSG00000000093	Tbx2	T-box 2
239	chr11	85832968	85832968	1	*	7.29318e-07	0.00359114	5.60342e-05	0.00353511	3.01668e-07	2.53338e-05	0.00275858	-0.00273325	FALSE	Promoter (<=1kb)	chr11	85832615	85841948	9334	+	21385	uc007ksb.1	353	ENSMUSG00000000093	Tbx2	T-box 2
240	chr11	85832976	85832976	1	*	7.29318e-07	0.00359114	5.60342e-05	0.00353511	3.05102e-08	0.344906	0.00290656	0.341999	TRUE	Promoter (<=1kb)	chr11	85832615	85841948	9334	+	21385	uc007ksb.1	361	ENSMUSG00000000093	Tbx2	T-box 2
241	chr11	88718641	88718707	67	*	1.49622e-08	0.377686	0.00280555	0.374881	7.49563e-05	0.01009	0.000189178	0.00990083	TRUE	Promoter (<=1kb)	chr11	88718643	88722600	3958	+	193280	uc007kvs.2	0	#N/A	C030037D09Rik	RIKEN cDNA C030037D09 gene
242	chr11	88718787	88718865	79	*	0.000126592	2.9645e-05	0.000597844	-0.000568199	4.9922e-10	0.00183394	0.338175	-0.336341	TRUE	Promoter (<=1kb)	chr11	88718643	88722600	3958	+	193280	uc007kvs.2	222	#N/A	C030037D09Rik	RIKEN cDNA C030037D09 gene
243	chr11	94549051	94549183	133	*	4.61567e-09	0.376966	0.00234731	0.374619	9.23972e-07	2.74344e-05	0.00107878	-0.00105135	FALSE	Promoter (<=1kb)	chr11	94539798	94549207	9410	-	237926	uc007kza.2	24	ENSMUSG00000039096	Rsad1	radical S-adenosyl methionine domain containing 1
244	chr11	94549193	94549195	3	*	4.61567e-09	0.376966	0.00234731	0.374619	1.59218e-08	0.316443	0.00255088	0.313892	TRUE	Promoter (<=1kb)	chr11	94539798	94549207	9410	-	237926	uc007kza.2	12	ENSMUSG00000039096	Rsad1	radical S-adenosyl methionine domain containing 1
245	chr11	94549210	94549229	20	*	4.61567e-09	0.376966	0.00234731	0.374619	1.04134e-06	6.98719e-05	0.00440033	-0.00433046	FALSE	Promoter (<=1kb)	chr11	94539798	94549207	9410	-	237926	uc007kza.2	-3	ENSMUSG00000039096	Rsad1	radical S-adenosyl methionine domain containing 1
246	chr11	94549237	94549251	15	*	4.61567e-09	0.376966	0.00234731	0.374619	4.27599e-05	0.265747	0.00721539	0.258532	TRUE	Promoter (<=1kb)	chr11	94539798	94549207	9410	-	237926	uc007kza.2	-30	ENSMUSG00000039096	Rsad1	radical S-adenosyl methionine domain containing 1
247	chr11	94991064	94991229	166	*	0.00273864	0.0017156	0.127087	-0.125371	8.90849e-07	0.219096	0.00225729	0.217012	FALSE	Promoter (<=1kb)	chr11	94991212	95006898	15687	+	217124	uc007kzr.2	0	ENSMUSG00000038976	Ppp1r9b	protein phosphatase 1, regulatory subunit 9B
248	chr11	94991064	94991229	166	*	3.64412e-05	0.00403174	7.16763e-05	0.00396006	8.90849e-07	0.219096	0.00225729	0.217012	TRUE	Promoter (<=1kb)	chr11	94991212	95006898	15687	+	217124	uc007kzr.2	0	ENSMUSG00000038976	Ppp1r9b	protein phosphatase 1, regulatory subunit 9B
249	chr11	95309669	95309692	24	*	1.99401e-12	0.384884	0.000745819	0.384139	2.59641e-05	0.000111227	0.00659721	-0.00648601	FALSE	Promoter (<=1kb)	chr11	95271853	95310246	38394	-	217127	uc007lad.2	554	ENSMUSG00000038909	Kat7	K(lysine) acetyltransferase 7
250	chr11	97041735	97041780	46	*	2.87541e-06	0.00260982	3.2998e-05	0.00257179	3.6207e-07	0.0162622	0.000142692	0.0161195	TRUE	Promoter (<=1kb)	chr11	97041586	97049213	7628	+	107732	uc007ldm.1	194	ENSMUSG00000001445	Mrpl10	mitochondrial ribosomal protein L10
251	chr11	97663203	97663311	109	*	7.16898e-06	0.00123967	3.09536e-05	0.00120871	1.46464e-07	0.00383806	0.338041	-0.334203	FALSE	Promoter (<=1kb)	chr11	97663412	97685458	22047	+	246198	uc007lei.1	-209	ENSMUSG00000038437	Mllt6	myeloid/lymphoid or mixed-lineage leukemia (trithorax homolog, Drosophila); translocated to, 6
252	chr11	97781964	97782045	82	*	0.000115267	0.00455249	0.000102185	0.0044503	9.57591e-08	0.00297558	3.00632e-05	0.00293688	TRUE	Promoter (<=1kb)	chr11	97781639	97781766	128	-	100302498	uc011ydw.1	-198	#N/A	Snora21	small nucleolar RNA, H/ACA box 21
253	chr11	98682783	98682858	76	*	0.000136775	0.000206714	0.018295	-0.0180312	1.12226e-05	0.00648435	0.29947	-0.292986	TRUE	Promoter (<=1kb)	chr11	98682554	98692517	9964	+	22123	uc007lgw.1	304	ENSMUSG00000017221	Psmd3	proteasome (prosome, macropain) 26S subunit, non-ATPase, 3
254	chr11	98741831	98741865	35	*	0.000470124	3.11146e-05	0.000479497	-0.000448383	1.0006e-06	2.56529e-05	0.00196554	-0.00193988	TRUE	Promoter (<=1kb)	chr11	98741873	98757695	15823	+	21833	uc007lhd.1	-42	ENSMUSG00000058756	Thra	thyroid hormone receptor alpha
255	chr11	98795114	98795257	144	*	0.00098287	0.0091753	0.00201363	0.00716167	7.43394e-05	0.00659995	0.23728	-0.23068	FALSE	Promoter (<=1kb)	chr11	98795769	98801038	5270	+	74026	uc007lhi.2	-655	ENSMUSG00000052915	Msl1	male-specific lethal 1 homolog (Drosophila)
256	chr11	98795638	98795698	61	*	7.89486e-12	0.385011	0.000937315	0.384055	3.18985e-11	0.332247	0.000794664	0.331427	TRUE	Promoter (<=1kb)	chr11	98795769	98801038	5270	+	74026	uc007lhi.2	-131	ENSMUSG00000052915	Msl1	male-specific lethal 1 homolog (Drosophila)
257	chr11	98796100	98796100	1	*	7.68441e-08	3.44568e-05	0.00512333	-0.00509128	0.000687456	0.00408028	0.000210473	0.00386981	FALSE	Promoter (<=1kb)	chr11	98795769	98801038	5270	+	74026	uc007lhi.2	331	ENSMUSG00000052915	Msl1	male-specific lethal 1 homolog (Drosophila)
258	chr11	98810102	98810127	26	*	4.97512e-05	3.50558e-05	0.00138553	-0.00135047	9.82129e-12	0.000650358	0.341338	-0.340688	TRUE	Promoter (<=1kb)	chr11	98798309	98810089	11781	-	100037262	uc007lhl.1	-13	ENSMUSG00000075576	Gm12359	predicted gene 12359
259	chr11	99385962	99386089	128	*	4.18238e-09	0.376603	0.00158088	0.374598	1.87718e-05	0.00720091	0.317167	-0.311039	FALSE	Exon (uc007lir.2/16661, exon 7 of 8)	chr11	99385256	99389364	4109	-	16661	uc007lir.2	3275	ENSMUSG00000019761	Krt10	keratin 10
260	chr11	101582186	101582223	38	*	1.13149e-06	0.00896609	6.06549e-05	0.00890543	0.00029863	0.239703	0.00602606	0.233677	TRUE	Promoter (<=1kb)	chr11	101582242	101591785	9544	+	217203	uc007lpl.1	-56	ENSMUSG00000034947	Tmem106a	transmembrane protein 106A
261	chr11	102185259	102185304	46	*	1.11179e-09	0.00534257	3.52255e-05	0.00530734	4.96318e-05	0.0003918	2.3002e-05	0.000368798	TRUE	Promoter (<=1kb)	chr11	102163489	102185256	21768	-	268490	uc007lqs.1	-3	ENSMUSG00000020922	Lsm12	LSM12 homolog (S. cerevisiae)
262	chr11	102248939	102249065	127	*	3.04433e-07	0.00393812	4.32262e-05	0.00389689	5.33095e-05	0.000498369	0.0202651	-0.0197032	FALSE	Promoter (<=1kb)	chr11	102248882	102265183	16302	+	217216	uc007lqz.1	183	ENSMUSG00000034773	BC030867	cDNA sequence BC030867
263	chr11	102249172	102249194	23	*	3.04433e-07	0.00393812	4.32262e-05	0.00389689	2.43178e-10	0.00126947	0.343531	-0.342262	FALSE	Promoter (<=1kb)	chr11	102248882	102265183	16302	+	217216	uc007lqz.1	312	ENSMUSG00000034773	BC030867	cDNA sequence BC030867
264	chr11	102318235	102318295	61	*	4.15918e-11	0.00172585	3.02054e-05	0.00169564	4.30796e-10	0.344313	0.00189356	0.34242	TRUE	Promoter (<=1kb)	chr11	102308894	102317654	8761	-	21429	uc007lrn.1	-581	ENSMUSG00000020923	Ubtf	upstream binding transcription factor, RNA polymerase I
265	chr11	102318304	102318328	25	*	4.15918e-11	0.00172585	3.02054e-05	0.00169564	0.000486466	0.000134184	0.00316081	-0.00302662	FALSE	Promoter (<=1kb)	chr11	102308894	102317654	8761	-	21429	uc007lrn.1	-650	ENSMUSG00000020923	Ubtf	upstream binding transcription factor, RNA polymerase I
266	chr11	102467171	102467277	107	*	2.29946e-08	0.0052501	6.07136e-05	0.00518938	5.69136e-09	0.3318	0.00197618	0.329824	TRUE	Promoter (<=1kb)	chr11	102456472	102467199	10728	-	16399	uc007lsa.1	0	ENSMUSG00000034664	Itga2b	integrin alpha 2b
267	chr11	105589531	105589605	75	*	1.3824e-06	4.08583e-05	0.00825246	-0.00821252	1.48495e-06	0.00138897	2.39876e-05	0.00136434	FALSE	Promoter (<=1kb)	chr11	105589986	105929303	339318	+	77097	uc007lxm.1	-455	ENSMUSG00000053580	Tanc2	tetratricopeptide repeat, ankyrin repeat and coiled-coil containing 2
268	chr11	105589660	105589662	3	*	5.64691e-05	0.00135132	4.58589e-05	0.00130546	1.54192e-06	2.3992e-05	0.00140249	-0.0013785	FALSE	Promoter (<=1kb)	chr11	105589986	105929303	339318	+	77097	uc007lxm.1	-326	ENSMUSG00000053580	Tanc2	tetratricopeptide repeat, ankyrin repeat and coiled-coil containing 2
269	chr11	105589670	105589687	18	*	5.64691e-05	0.00135132	4.58589e-05	0.00130546	2.2339e-09	0.344387	0.00179514	0.342592	TRUE	Promoter (<=1kb)	chr11	105589986	105929303	339318	+	77097	uc007lxm.1	-316	ENSMUSG00000053580	Tanc2	tetratricopeptide repeat, ankyrin repeat and coiled-coil containing 2
270	chr11	105589689	105589693	5	*	5.64691e-05	0.00135132	4.58589e-05	0.00130546	8.56521e-07	2.71546e-05	0.00242435	-0.0023972	FALSE	Promoter (<=1kb)	chr11	105589986	105929303	339318	+	77097	uc007lxm.1	-297	ENSMUSG00000053580	Tanc2	tetratricopeptide repeat, ankyrin repeat and coiled-coil containing 2
271	chr11	105589695	105589710	16	*	5.64691e-05	0.00135132	4.58589e-05	0.00130546	5.17623e-07	0.361755	0.00343607	0.358319	TRUE	Promoter (<=1kb)	chr11	105589986	105929303	339318	+	77097	uc007lxm.1	-291	ENSMUSG00000053580	Tanc2	tetratricopeptide repeat, ankyrin repeat and coiled-coil containing 2
272	chr11	106487726	106487808	83	*	3.10204e-15	0.384619	0.00032598	0.384235	1.06579e-06	0.0067778	0.33962	-0.332962	FALSE	Promoter (<=1kb)	chr11	106397620	106487796	90177	-	78943	uc007lyy.1	0	ENSMUSG00000020715	Ern1	endoplasmic reticulum (ER) to nucleus signalling 1
273	chr11	106920095	106920134	40	*	1.64499e-07	4.02371e-05	0.00494177	-0.0049015	5.30846e-06	0.00790952	7.2263e-05	0.00783684	FALSE	Promoter (<=1kb)	chr11	106820064	106920715	100652	-	66313	uc007lzx.2	581	ENSMUSG00000018363	Smurf2	SMAD specific E3 ubiquitin protein ligase 2
274	chr11	108921694	108921816	123	*	1.11292e-07	5.27772e-05	0.00834083	-0.00828805	3.83845e-07	0.00239512	3.29265e-05	0.00236219	FALSE	Promoter (1-2kb)	chr11	108920349	108950781	30433	+	12006	uc007mbu.2	1467	ENSMUSG00000000142	Axin2	axin2
275	chr11	108922080	108922080	1	*	5.60564e-07	0.399008	0.00793729	0.391071	0.00154452	0.00698544	0.164009	-0.157023	FALSE	Promoter (1-2kb)	chr11	108920349	108950781	30433	+	12006	uc007mbu.2	1731	ENSMUSG00000000142	Axin2	axin2
276	chr11	109440084	109440133	50	*	4.43381e-05	3.10746e-05	0.00122374	-0.00119267	5.61537e-07	0.309445	0.0058015	0.303644	FALSE	Promoter (<=1kb)	chr11	109440078	109453359	13282	+	100503496	uc007mck.2	55	#N/A	LOC100503496	uncharacterized LOC100503496
277	chr11	109611371	109611380	10	*	6.54867e-05	2.97575e-05	0.000624616	-0.000594969	4.5576e-13	0.00999476	3.60295e-05	0.00995873	FALSE	Promoter (<=1kb)	chr11	109573521	109611389	37869	-	52639	uc007mcq.1	9	ENSMUSG00000041895	Wipi1	WD repeat domain, phosphoinositide interacting 1
278	chr11	113751740	113751815	76	*	2.62164e-07	0.00286497	3.63474e-05	0.00282689	9.98705e-14	0.000362436	0.343031	-0.342668	FALSE	Promoter (<=1kb)	chr11	113726850	113751815	24966	-	56699	uc007mfc.2	0	ENSMUSG00000041598	Cdc42ep4	CDC42 effector protein (Rho GTPase binding) 4
279	chr11	115491768	115491797	30	*	1.05691e-05	3.20185e-05	0.00155219	-0.00152062	5.62046e-05	2.34025e-05	0.000431345	-0.000407942	TRUE	Promoter (<=1kb)	chr11	115490426	115491814	1389	-	50773	uc007mhu.1	17	ENSMUSG00000020736	Nt5c	5',3'-nucleotidase, cytosolic
280	chr11	116199035	116199102	68	*	4.36922e-07	3.785e-05	0.00223384	-0.00219586	1.06359e-08	0.0031615	2.41013e-05	0.00313557	FALSE	Promoter (<=1kb)	chr11	116171883	116199045	27163	-	11430	uc007mkl.2	0	ENSMUSG00000020777	Acox1	acyl-Coenzyme A oxidase 1, palmitoyl
281	chr11	116306645	116306686	42	*	2.88579e-13	0.383987	0.000565754	0.383488	6.16456e-05	0.00925977	0.284448	-0.275188	FALSE	Promoter (<=1kb)	chr11	116287998	116306738	18741	-	53413	uc007mkt.2	52	ENSMUSG00000020792	Exoc7	exocyst complex component 7
282	chr11	119300084	119300107	24	*	6.87295e-05	0.00243689	5.73171e-05	0.00233713	1.00369e-09	0.00163899	0.34357	-0.341931	FALSE	Promoter (<=1kb)	chr11	119288363	119300043	11681	-	192170	uc007mqj.1	-41	ENSMUSG00000025580	Eif4a3	eukaryotic translation initiation factor 4A3
283	chr11	120151222	120151326	105	*	8.09796e-08	0.377543	0.00380192	0.373867	0.000303833	0.233567	0.00997616	0.223528	TRUE	Promoter (<=1kb)	chr11	120103951	120151351	47401	-	72055	uc007mrv.2	25	ENSMUSG00000061306	Slc38a10	solute carrier family 38, member 10
284	chr11	120230405	120230528	124	*	0.00680543	0.0647877	0.007696	0.0570917	1.74782e-12	0.00753925	3.50539e-05	0.00747382	TRUE	Promoter (2-3kb)	chr11	120232947	120292297	59351	+	268515	uc007msd.2	-2542	ENSMUSG00000039741	Bahcc1	BAH domain and coiled-coil containing 1
285	chr11	120230983	120231027	45	*	2.85988e-11	0.00475922	3.48051e-05	0.00472442	2.77093e-10	0.00140867	0.336442	-0.335033	FALSE	Promoter (1-2kb)	chr11	120232947	120292297	59351	+	268515	uc007msd.2	-1964	ENSMUSG00000039741	Bahcc1	BAH domain and coiled-coil containing 1
286	chr11	120231029	120231029	1	*	2.85988e-11	0.00475922	3.48051e-05	0.00472442	0.000526118	0.000211188	2.37924e-05	0.000187395	TRUE	Promoter (1-2kb)	chr11	120232947	120292297	59351	+	268515	uc007msd.2	-1918	ENSMUSG00000039741	Bahcc1	BAH domain and coiled-coil containing 1
287	chr11	120231030	120231200	171	*	2.85988e-11	0.00475922	3.48051e-05	0.00472442	1.31569e-05	2.45933e-05	0.000726745	-0.000702151	FALSE	Promoter (1-2kb)	chr11	120232947	120292297	59351	+	268515	uc007msd.2	-1917	ENSMUSG00000039741	Bahcc1	BAH domain and coiled-coil containing 1
288	chr11	120231030	120231200	171	*	2.7571e-05	3.11196e-05	0.00139313	-0.00136196	1.31569e-05	2.45933e-05	0.000726745	-0.000702151	TRUE	Promoter (1-2kb)	chr11	120232947	120292297	59351	+	268515	uc007msd.2	-1917	ENSMUSG00000039741	Bahcc1	BAH domain and coiled-coil containing 1
289	chr11	120231205	120231243	39	*	2.7571e-05	3.11196e-05	0.00139313	-0.00136196	7.22161e-06	0.00306461	3.40378e-05	0.00303057	FALSE	Promoter (1-2kb)	chr11	120232947	120292297	59351	+	268515	uc007msd.2	-1742	ENSMUSG00000039741	Bahcc1	BAH domain and coiled-coil containing 1
290	chr11	120231244	120231255	12	*	2.7571e-05	3.11196e-05	0.00139313	-0.00136196	1.77692e-06	0.00566292	0.327864	-0.322201	TRUE	Promoter (1-2kb)	chr11	120232947	120292297	59351	+	268515	uc007msd.2	-1703	ENSMUSG00000039741	Bahcc1	BAH domain and coiled-coil containing 1
291	chr11	120231256	120231256	1	*	2.7571e-05	3.11196e-05	0.00139313	-0.00136196	0.00102513	0.0145714	0.000452584	0.0141188	FALSE	Promoter (1-2kb)	chr11	120232947	120292297	59351	+	268515	uc007msd.2	-1691	ENSMUSG00000039741	Bahcc1	BAH domain and coiled-coil containing 1
292	chr11	120231257	120231268	12	*	2.7571e-05	3.11196e-05	0.00139313	-0.00136196	1.81743e-06	0.00626775	0.336964	-0.330696	TRUE	Promoter (1-2kb)	chr11	120232947	120292297	59351	+	268515	uc007msd.2	-1690	ENSMUSG00000039741	Bahcc1	BAH domain and coiled-coil containing 1
293	chr11	120231353	120231353	1	*	2.7571e-05	3.11196e-05	0.00139313	-0.00136196	4.56879e-09	0.302009	0.00179599	0.300213	FALSE	Promoter (1-2kb)	chr11	120232947	120292297	59351	+	268515	uc007msd.2	-1594	ENSMUSG00000039741	Bahcc1	BAH domain and coiled-coil containing 1
294	chr11	120721587	120721624	38	*	1.80884e-05	7.74858e-05	0.00976968	-0.0096922	8.0978e-13	0.343893	0.000502713	0.34339	FALSE	Promoter (<=1kb)	chr11	120721468	120723969	2502	+	170758	uc007mug.1	156	ENSMUSG00000018012	Rac3	RAS-related C3 botulinum substrate 3
295	chr11	121388107	121388234	128	*	7.05649e-06	0.0020422	4.73484e-05	0.00199582	2.67944e-11	0.000901874	0.334645	-0.33356	FALSE	Promoter (<=1kb)	chr11	121356121	121388251	32131	-	217371	uc007mvu.2	17	ENSMUSG00000025170	Rab40b	Rab40B, member RAS oncogene family
296	chr11	121421614	121421676	63	*	1.09929e-05	0.00313589	4.20413e-05	0.00309818	3.13562e-08	0.00233213	0.318563	-0.316329	FALSE	Promoter (<=1kb)	chr11	121421373	121430768	9396	+	238024	uc007mvv.2	303	ENSMUSG00000039253	Fn3krp	fructosamine 3 kinase related protein
297	chr11	121421702	121421702	1	*	1.09929e-05	0.00313589	4.20413e-05	0.00309818	7.10081e-08	0.00383597	3.05817e-05	0.00380538	TRUE	Promoter (<=1kb)	chr11	121421373	121430768	9396	+	238024	uc007mvv.2	329	ENSMUSG00000039253	Fn3krp	fructosamine 3 kinase related protein
298	chr11	121421714	121421714	1	*	1.09929e-05	0.00313589	4.20413e-05	0.00309818	2.29945e-07	0.00390464	0.330445	-0.32654	FALSE	Promoter (<=1kb)	chr11	121421373	121430768	9396	+	238024	uc007mvv.2	341	ENSMUSG00000039253	Fn3krp	fructosamine 3 kinase related protein
299	chr11	121421715	121421715	1	*	1.09929e-05	0.00313589	4.20413e-05	0.00309818	2.03612e-07	0.00392105	3.65714e-05	0.00388448	TRUE	Promoter (<=1kb)	chr11	121421373	121430768	9396	+	238024	uc007mvv.2	342	ENSMUSG00000039253	Fn3krp	fructosamine 3 kinase related protein
300	chr11	121421735	121421736	2	*	1.09929e-05	0.00313589	4.20413e-05	0.00309818	1.01671e-06	0.00441458	0.311812	-0.307398	FALSE	Promoter (<=1kb)	chr11	121421373	121430768	9396	+	238024	uc007mvv.2	363	ENSMUSG00000039253	Fn3krp	fructosamine 3 kinase related protein
301	chr11	121421749	121421749	1	*	1.09929e-05	0.00313589	4.20413e-05	0.00309818	2.00583e-05	0.00508377	8.72055e-05	0.00499657	TRUE	Promoter (<=1kb)	chr11	121421373	121430768	9396	+	238024	uc007mvv.2	376	ENSMUSG00000039253	Fn3krp	fructosamine 3 kinase related protein
302	chr11	121421750	121421750	1	*	1.09929e-05	0.00313589	4.20413e-05	0.00309818	6.44454e-06	0.00513433	0.286703	-0.281568	FALSE	Promoter (<=1kb)	chr11	121421373	121430768	9396	+	238024	uc007mvv.2	377	ENSMUSG00000039253	Fn3krp	fructosamine 3 kinase related protein
303	chr11	121421764	121421764	1	*	1.09929e-05	0.00313589	4.20413e-05	0.00309818	0.00291189	0.0076762	0.000342242	0.00733396	TRUE	Promoter (<=1kb)	chr11	121421373	121430768	9396	+	238024	uc007mvv.2	391	ENSMUSG00000039253	Fn3krp	fructosamine 3 kinase related protein
304	chr11	121672866	121673020	155	*	1.18119e-05	0.000827181	3.47135e-05	0.000792468	1.11726e-08	0.00887623	8.97948e-05	0.00878643	TRUE	Promoter (<=1kb)	chr11	121616208	121673151	56944	-	210004	uc007mwb.2	131	ENSMUSG00000046605	B3gntl1	UDP-GlcNAc:betaGal beta-1,3-N-acetylglucosaminyltransferase-like 1
305	chr12	3572305	3572432	128	*	0.000256649	2.97158e-05	0.000503608	-0.000473848	6.47058e-06	0.000984366	2.42366e-05	0.000960129	FALSE	Promoter (<=1kb)	chr12	3572391	3646786	74396	+	13528	uc007mwu.2	0	ENSMUSG00000071454	Dtnb	dystrobrevin, beta
306	chr12	3572698	3572722	25	*	8.62005e-12	0.384001	0.00113421	0.382867	0.000194874	0.31196	0.0139681	0.297992	TRUE	Promoter (<=1kb)	chr12	3572391	3646786	74396	+	13528	uc007mwu.2	331	ENSMUSG00000071454	Dtnb	dystrobrevin, beta
307	chr12	3806613	3806638	26	*	8.45704e-06	0.00515219	0.000115937	0.00504528	1.6119e-08	0.00213186	0.326867	-0.324693	FALSE	Promoter (<=1kb)	chr12	3806523	3867484	60962	+	13435	uc007mxa.2	115	ENSMUSG00000020661	Dnmt3a	DNA methyltransferase 3A
308	chr12	3806873	3807023	151	*	1.24879e-06	4.12968e-05	0.00319974	-0.00316254	2.81032e-13	0.344362	0.000457945	0.343904	FALSE	Promoter (<=1kb)	chr12	3806980	3914443	107464	+	13435	uc007mxb.1	0	ENSMUSG00000020661	Dnmt3a	DNA methyltransferase 3A
309	chr12	3807270	3807318	49	*	0.000170254	0.000586898	3.15367e-05	0.000555362	8.76034e-10	0.00154419	0.337156	-0.335612	FALSE	Promoter (<=1kb)	chr12	3807160	3914443	107284	+	13435	uc007mxc.1	158	ENSMUSG00000020661	Dnmt3a	DNA methyltransferase 3A
310	chr12	4476615	4476809	195	*	9.55408e-06	0.308537	0.00378812	0.304748	7.08019e-08	2.45673e-05	0.00181101	-0.00178693	FALSE	Promoter (<=1kb)	chr12	4247362	4477182	229821	-	17977	uc007mxs.2	373	ENSMUSG00000020647	Ncoa1	nuclear receptor coactivator 1
311	chr12	8499594	8499687	94	*	5.73543e-11	3.85154e-05	0.00494908	-0.00490997	1.01394e-06	0.331224	0.00569625	0.325528	FALSE	Promoter (<=1kb)	chr12	8497759	8499985	2227	-	11852	uc007mzp.1	298	ENSMUSG00000054364	Rhob	ras homolog gene family, member B
312	chr12	10390831	10390907	77	*	7.19658e-10	0.383967	0.00118895	0.382158	6.5798e-07	0.3433	0.00523033	0.338275	TRUE	Promoter (<=1kb)	chr12	10390780	10395562	4783	+	105014	uc007nar.2	127	ENSMUSG00000020621	Rdh14	retinol dehydrogenase 14 (all-trans and 9-cis)
313	chr12	10390909	10390909	1	*	7.19658e-10	0.383967	0.00118895	0.382158	5.64391e-08	3.05372e-05	0.00675461	-0.00672407	FALSE	Promoter (<=1kb)	chr12	10390780	10395562	4783	+	105014	uc007nar.2	129	ENSMUSG00000020621	Rdh14	retinol dehydrogenase 14 (all-trans and 9-cis)
314	chr12	17690756	17690774	19	*	0.00355672	0.0151592	0.00069156	0.0144677	0.00149382	0.0132428	0.239858	-0.226197	FALSE	Promoter (<=1kb)	chr12	17690814	17786548	95735	+	53602	uc007ncw.1	-58	ENSMUSG00000071379	Hpcal1	hippocalcin-like 1
315	chr12	17691331	17691382	52	*	4.88828e-11	0.383991	0.0014412	0.382407	1.2735e-05	0.314682	0.00908271	0.305599	TRUE	Promoter (<=1kb)	chr12	17690814	17786548	95735	+	53602	uc007ncw.1	568	ENSMUSG00000071379	Hpcal1	hippocalcin-like 1
316	chr12	24651131	24651148	18	*	2.41518e-07	3.07938e-05	0.00199721	-0.0019665	0.000236786	0.0169648	0.316718	-0.299753	TRUE	Promoter (<=1kb)	chr12	24651371	24662782	11412	+	194655	uc007neo.2	-240	ENSMUSG00000020653	Klf11	Kruppel-like factor 11
317	chr12	24651632	24651747	116	*	4.65939e-08	0.383271	0.00374075	0.37953	3.65506e-05	0.289247	0.00913203	0.280277	TRUE	Promoter (<=1kb)	chr12	24651371	24662782	11412	+	194655	uc007neo.2	376	ENSMUSG00000020653	Klf11	Kruppel-like factor 11
318	chr12	24651752	24651752	1	*	4.65939e-08	0.383271	0.00374075	0.37953	4.13108e-06	6.20348e-05	0.00408498	-0.00402295	FALSE	Promoter (<=1kb)	chr12	24651371	24662782	11412	+	194655	uc007neo.2	381	ENSMUSG00000020653	Klf11	Kruppel-like factor 11
319	chr12	24651758	24651758	1	*	4.65939e-08	0.383271	0.00374075	0.37953	3.93305e-07	0.307284	0.00362704	0.303657	TRUE	Promoter (<=1kb)	chr12	24651371	24662782	11412	+	194655	uc007neo.2	387	ENSMUSG00000020653	Klf11	Kruppel-like factor 11
320	chr12	24651762	24651762	1	*	4.65939e-08	0.383271	0.00374075	0.37953	5.98207e-06	5.8631e-05	0.00333548	-0.00327685	FALSE	Promoter (<=1kb)	chr12	24651371	24662782	11412	+	194655	uc007neo.2	391	ENSMUSG00000020653	Klf11	Kruppel-like factor 11
321	chr12	24708321	24708339	19	*	0.00135208	0.0542687	0.00166259	0.0526061	0.000522997	0.0022436	0.0378489	-0.0356678	FALSE	Promoter (<=1kb)	chr12	24708254	24714146	5893	+	20135	uc007ner.2	85	ENSMUSG00000020649	Rrm2	ribonucleotide reductase M2
322	chr12	32378796	32378872	77	*	1.43029e-05	0.00313356	4.40606e-05	0.00308923	7.58683e-09	0.00231132	0.344926	-0.342627	FALSE	Promoter (<=1kb)	chr12	32378789	32382943	4155	+	72123	uc007nie.2	83	ENSMUSG00000090946	Ccdc71l	coiled-coil domain containing 71 like
323	chr12	32954477	32954554	78	*	1.10088e-12	0.384385	0.000656089	0.383729	2.49491e-09	2.82665e-05	0.00250049	-0.00247223	FALSE	Promoter (<=1kb)	chr12	32954186	32979502	25317	+	19027	uc007nii.2	368	ENSMUSG00000020570	Sypl	synaptophysin-like protein
324	chr12	35046965	35047040	76	*	8.0375e-05	3.19435e-05	0.00151851	-0.00148656	3.84465e-10	0.34073	0.00119093	0.339534	FALSE	Promoter (<=1kb)	chr12	35047189	35091966	44778	+	217463	uc007njf.2	-224	ENSMUSG00000020590	Snx13	sorting nexin 13
325	chr12	36042073	36042138	66	*	2.28652e-06	0.00297901	5.50081e-05	0.00292309	1.31021e-08	0.00197297	0.307305	-0.305332	FALSE	Promoter (<=1kb)	chr12	36014555	36042478	27924	-	66109	uc007njn.1	340	ENSMUSG00000020577	Tspan13	tetraspanin 13
326	chr12	36156357	36156357	1	*	4.28004e-06	0.00183299	3.34673e-05	0.00179952	0.000424766	2.4071e-05	0.000235748	-0.000211677	FALSE	Promoter (<=1kb)	chr12	36091835	36156825	64991	-	66912	uc007njp.2	468	ENSMUSG00000020547	Bzw2	basic leucine zipper and W2 domains 2
327	chr12	36156362	36156472	111	*	4.28004e-06	0.00183299	3.34673e-05	0.00179952	1.09776e-12	0.344138	0.000581851	0.343369	TRUE	Promoter (<=1kb)	chr12	36091835	36156825	64991	-	66912	uc007njp.2	353	ENSMUSG00000020547	Bzw2	basic leucine zipper and W2 domains 2
328	chr12	40037448	40037477	30	*	8.54512e-11	4.01439e-05	0.0140185	-0.0139749	2.41301e-07	0.00363918	0.321267	-0.317628	TRUE	Promoter (<=1kb)	chr12	40005447	40037376	31930	-	11861	uc007nkr.1	-72	ENSMUSG00000047446	Arl4a	ADP-ribosylation factor-like 4A
329	chr12	40445909	40446039	131	*	8.11554e-05	0.000504142	3.15914e-05	0.000472815	5.72614e-08	0.00343065	0.336617	-0.333186	FALSE	Promoter (<=1kb)	chr12	40315046	40445790	130745	-	246196	uc007nla.2	-119	ENSMUSG00000055917	Zfp277	zinc finger protein 277
330	chr12	40446047	40446047	1	*	8.11554e-05	0.000504142	3.15914e-05	0.000472815	3.75135e-09	0.00164262	2.42086e-05	0.00161841	TRUE	Promoter (<=1kb)	chr12	40446053	40637690	191638	+	238130	uc007nlc.1	-6	ENSMUSG00000035954	Dock4	dedicator of cytokinesis 4
331	chr12	40446051	40446053	3	*	8.11554e-05	0.000504142	3.15914e-05	0.000472815	2.14669e-10	0.00156098	0.345319	-0.343758	FALSE	Promoter (<=1kb)	chr12	40446053	40637690	191638	+	238130	uc007nlc.1	0	ENSMUSG00000035954	Dock4	dedicator of cytokinesis 4
332	chr12	40446062	40446062	1	*	8.11554e-05	0.000504142	3.15914e-05	0.000472815	1.56138e-08	0.00141483	2.46666e-05	0.00139016	TRUE	Promoter (<=1kb)	chr12	40446053	40637690	191638	+	238130	uc007nlc.1	9	ENSMUSG00000035954	Dock4	dedicator of cytokinesis 4
333	chr12	54985265	54985323	59	*	1.29515e-12	0.385385	0.000723972	0.384661	5.12252e-07	0.00519028	4.69218e-05	0.00514335	TRUE	Promoter (1-2kb)	chr12	54892989	54986336	93348	-	217578	uc007nnz.2	1013	ENSMUSG00000035021	Baz1a	bromodomain adjacent to zinc finger domain 1A
334	chr12	69371843	69371923	81	*	2.06717e-05	3.21866e-05	0.00144742	-0.00141551	1.61645e-07	0.00568507	0.345198	-0.339513	TRUE	Promoter (<=1kb)	chr12	69372150	69375980	3831	+	11845	uc007nsj.1	-307	ENSMUSG00000044147	Arf6	ADP-ribosylation factor 6
335	chr12	70111910	70112039	130	*	6.03961e-05	3.04839e-05	0.00095123	-0.000920836	5.70699e-10	0.00142994	0.341636	-0.340206	TRUE	Promoter (<=1kb)	chr12	70018740	70112035	93296	-	18080	uc007ntg.2	0	ENSMUSG00000021068	Nin	ninein
336	chr12	70825505	70825546	42	*	0.000104389	3.47235e-05	0.00304236	-0.003009	3.70551e-09	2.83633e-05	0.00271587	-0.00268751	TRUE	Promoter (<=1kb)	chr12	70825514	70902234	76721	+	319710	uc007ntv.1	0	ENSMUSG00000048285	Frmd6	FERM domain containing 6
337	chr12	70938048	70938048	1	*	1.23918e-05	0.00237973	4.53994e-05	0.00233433	7.04515e-09	0.328012	0.00211835	0.325893	TRUE	Promoter (<=1kb)	chr12	70937857	70964717	26861	+	56444	uc007nty.2	191	ENSMUSG00000021076	Actr10	ARP10 actin-related protein 10
338	chr12	70938060	70938067	8	*	1.23918e-05	0.00237973	4.53994e-05	0.00233433	2.05959e-06	4.203e-05	0.00236979	-0.00232776	FALSE	Promoter (<=1kb)	chr12	70937857	70964717	26861	+	56444	uc007nty.2	210	ENSMUSG00000021076	Actr10	ARP10 actin-related protein 10
339	chr12	70938072	70938072	1	*	1.23918e-05	0.00237973	4.53994e-05	0.00233433	3.03941e-08	0.319971	0.00255433	0.317416	TRUE	Promoter (<=1kb)	chr12	70937857	70964717	26861	+	56444	uc007nty.2	215	ENSMUSG00000021076	Actr10	ARP10 actin-related protein 10
340	chr12	71016896	71017187	292	*	1.80667e-07	3.11015e-05	0.00208498	-0.00205389	1.05094e-09	0.00138047	0.331813	-0.33038	TRUE	Promoter (<=1kb)	chr12	71016708	71047360	30653	+	238247	uc007nue.1	479	ENSMUSG00000048118	Arid4a	AT rich interactive domain 4A (RBP1-like)
341	chr12	71016896	71017187	292	*	1.04032e-09	0.383336	0.00182315	0.381513	1.05094e-09	0.00138047	0.331813	-0.33038	FALSE	Promoter (<=1kb)	chr12	71016708	71047360	30653	+	238247	uc007nue.1	479	ENSMUSG00000048118	Arid4a	AT rich interactive domain 4A (RBP1-like)
342	chr12	71016896	71017187	292	*	2.50951e-06	0.000296256	0.0229733	-0.0226771	1.05094e-09	0.00138047	0.331813	-0.33038	TRUE	Promoter (<=1kb)	chr12	71016708	71047360	30653	+	238247	uc007nue.1	479	ENSMUSG00000048118	Arid4a	AT rich interactive domain 4A (RBP1-like)
343	chr12	71310029	71310078	50	*	1.50288e-05	4.32283e-05	0.00351331	-0.00347008	2.93738e-07	0.000322978	0.0570887	-0.0567657	TRUE	Promoter (<=1kb)	chr12	71309884	71320107	10224	+	59036	uc007nup.2	194	ENSMUSG00000044548	Dact1	dapper homolog 1, antagonist of beta-catenin (xenopus)
344	chr12	73907799	73907893	95	*	6.60807e-06	3.09002e-05	0.00198312	-0.00195222	4.01502e-11	0.00107067	0.346024	-0.344953	TRUE	Promoter (<=1kb)	chr12	73907867	73933076	25210	+	15251	uc007nwp.2	0	ENSMUSG00000021109	Hif1a	hypoxia inducible factor 1, alpha subunit
345	chr12	75595857	75595917	61	*	2.25821e-07	0.00384703	3.95474e-05	0.00380748	1.48997e-07	0.00356456	0.332183	-0.328618	FALSE	Promoter (<=1kb)	chr12	75450881	75596200	145320	-	26932	uc007nxe.1	283	ENSMUSG00000021051	Ppp2r5e	protein phosphatase 2, regulatory subunit B', epsilon
346	chr12	76369238	76369302	65	*	9.84451e-07	0.00138049	3.1819e-05	0.00134843	0.00193847	0.0199699	0.000716033	0.0191814	TRUE	Promoter (<=1kb)	chr12	76348900	76369464	20565	-	109929	uc007nyc.2	162	ENSMUSG00000056459	Zbtb25	zinc finger and BTB domain containing 25
347	chr12	80435612	80435715	104	*	6.39935e-06	0.0106796	0.000116457	0.0105757	8.73408e-05	0.000510754	2.64592e-05	0.000485193	TRUE	Promoter (<=1kb)	chr12	80335847	80436601	100755	-	320808	uc007oar.2	886	ENSMUSG00000049106	Dcaf5	DDB1 and CUL4 associated factor 5
348	chr12	80790587	80790587	1	*	6.40876e-07	0.00298457	3.73184e-05	0.00294397	0.00070691	2.46558e-05	0.000234638	-0.000209982	FALSE	Promoter (<=1kb)	chr12	80790532	80880833	90302	+	217684	uc007obi.2	55	ENSMUSG00000021133	Susd6	sushi domain containing 6
349	chr12	80790593	80790596	4	*	6.40876e-07	0.00298457	3.73184e-05	0.00294397	6.79581e-10	0.327147	0.00115281	0.325994	TRUE	Promoter (<=1kb)	chr12	80790532	80880833	90302	+	217684	uc007obi.2	64	ENSMUSG00000021133	Susd6	sushi domain containing 6
350	chr12	80790599	80790601	3	*	6.40876e-07	0.00298457	3.73184e-05	0.00294397	8.86631e-05	4.42962e-05	0.00147985	-0.00143556	FALSE	Promoter (<=1kb)	chr12	80790532	80880833	90302	+	217684	uc007obi.2	69	ENSMUSG00000021133	Susd6	sushi domain containing 6
351	chr12	80790619	80790619	1	*	6.40876e-07	0.00298457	3.73184e-05	0.00294397	7.141e-09	0.324222	0.00177663	0.322446	TRUE	Promoter (<=1kb)	chr12	80790532	80880833	90302	+	217684	uc007obi.2	87	ENSMUSG00000021133	Susd6	sushi domain containing 6
352	chr12	80790666	80790670	5	*	6.40876e-07	0.00298457	3.73184e-05	0.00294397	0.000343062	5.89497e-05	0.00184544	-0.00178649	FALSE	Promoter (<=1kb)	chr12	80790532	80880833	90302	+	217684	uc007obi.2	138	ENSMUSG00000021133	Susd6	sushi domain containing 6
353	chr12	80945894	80945894	1	*	1.96302e-09	0.37556	0.00179083	0.373769	4.63068e-10	0.341973	0.00131304	0.34066	TRUE	Promoter (<=1kb)	chr12	80945504	80946848	1345	+	20384	uc007obm.1	390	ENSMUSG00000021134	Srsf5	serine/arginine-rich splicing factor 5
354	chr12	80945896	80945909	14	*	1.96302e-09	0.37556	0.00179083	0.373769	8.08588e-06	2.6848e-05	0.00120726	-0.00118041	FALSE	Promoter (<=1kb)	chr12	80945504	80946848	1345	+	20384	uc007obm.1	405	ENSMUSG00000021134	Srsf5	serine/arginine-rich splicing factor 5
355	chr12	80945928	80946057	130	*	1.96302e-09	0.37556	0.00179083	0.373769	3.91394e-11	0.00397748	2.46407e-05	0.00395354	TRUE	Promoter (<=1kb)	chr12	80945504	80946848	1345	+	20384	uc007obm.1	553	ENSMUSG00000021134	Srsf5	serine/arginine-rich splicing factor 5
356	chr12	83921422	83921541	120	*	0.000102423	0.00198275	5.86038e-05	0.00192415	1.34445e-10	0.334137	0.00125778	0.33288	TRUE	Promoter (<=1kb)	chr12	83794034	83921934	127901	-	18222	uc007odx.2	393	ENSMUSG00000021224	Numb	numb gene homolog (Drosophila)
357	chr12	83921543	83921543	1	*	0.000102423	0.00198275	5.86038e-05	0.00192415	9.48127e-06	2.53183e-05	0.000880226	-0.000854908	FALSE	Promoter (<=1kb)	chr12	83794034	83921934	127901	-	18222	uc007odx.2	391	ENSMUSG00000021224	Numb	numb gene homolog (Drosophila)
358	chr12	83921552	83921552	1	*	0.000102423	0.00198275	5.86038e-05	0.00192415	1.15712e-10	0.342758	0.00110697	0.341651	TRUE	Promoter (<=1kb)	chr12	83794034	83921934	127901	-	18222	uc007odx.2	382	ENSMUSG00000021224	Numb	numb gene homolog (Drosophila)
359	chr12	83950569	83950569	1	*	2.92155e-05	0.00476627	7.57794e-05	0.00469049	0.000352468	0.0119194	0.000340221	0.0115791	TRUE	Promoter (<=1kb)	chr12	83950608	83952953	2346	+	71952	uc007odz.2	-39	ENSMUSG00000046791	2410016O06Rik	RIKEN cDNA 2410016O06 gene
360	chr12	83950807	83950933	127	*	4.1779e-08	0.00754353	5.83316e-05	0.00748096	3.35218e-11	0.339576	0.0011521	0.338424	TRUE	Promoter (<=1kb)	chr12	83950608	83952953	2346	+	71952	uc007odz.2	325	ENSMUSG00000046791	2410016O06Rik	RIKEN cDNA 2410016O06 gene
361	chr12	84193968	84194159	192	*	9.88366e-05	3.75455e-05	0.00124178	-0.00120433	2.49699e-06	0.00179984	4.05955e-05	0.00175924	FALSE	Promoter (<=1kb)	chr12	84149174	84194015	44842	-	238317	uc011you.2	0	ENSMUSG00000042507	Elmsan1	ELM2 and Myb/SANT-like domain containing 1
362	chr12	85599587	85599669	83	*	2.81651e-05	0.00136048	3.45416e-05	0.00131923	5.9733e-07	2.47972e-05	0.0010674	-0.00104119	FALSE	Promoter (<=1kb)	chr12	85599416	85639878	40463	+	81703	uc007ohc.1	253	ENSMUSG00000034271	Jdp2	Jun dimerization protein 2
363	chr12	95694242	95694377	136	*	8.66784e-08	0.00298112	4.76507e-05	0.00293569	1.7357e-09	0.00260028	0.333581	-0.332178	FALSE	Promoter (2-3kb)	chr12	95692226	95785213	92988	+	399558	uc007olc.2	2151	ENSMUSG00000047414	Flrt2	fibronectin leucine rich transmembrane protein 2
364	chr12	95695834	95695875	42	*	9.61815e-05	0.000574428	3.15487e-05	0.00054288	2.40753e-06	0.0112209	0.000109385	0.0111115	TRUE	Intron (uc007olc.2/399558, intron 1 of 1)	chr12	95692226	95785213	92988	+	399558	uc007olc.2	3649	ENSMUSG00000047414	Flrt2	fibronectin leucine rich transmembrane protein 2
365	chr12	102877936	102877937	2	*	2.22703e-06	0.0021915	3.34022e-05	0.0021581	4.60922e-11	0.340571	0.000849562	0.339721	TRUE	Promoter (<=1kb)	chr12	102784648	102878406	93759	-	238386	uc007ouq.1	469	ENSMUSG00000041702	Btbd7	BTB (POZ) domain containing 7
366	chr12	102877946	102877946	1	*	2.22703e-06	0.0021915	3.34022e-05	0.0021581	0.000123479	2.51684e-05	0.000527158	-0.000501989	FALSE	Promoter (<=1kb)	chr12	102784648	102878406	93759	-	238386	uc007ouq.1	460	ENSMUSG00000041702	Btbd7	BTB (POZ) domain containing 7
367	chr12	102877949	102877951	3	*	2.22703e-06	0.0021915	3.34022e-05	0.0021581	6.52583e-13	0.345166	0.000410472	0.344755	TRUE	Promoter (<=1kb)	chr12	102784648	102878406	93759	-	238386	uc007ouq.1	455	ENSMUSG00000041702	Btbd7	BTB (POZ) domain containing 7
368	chr12	105032920	105033014	95	*	0.00115666	0.000129028	0.00392821	-0.00378954	3.74596e-12	0.342822	0.000693713	0.342185	FALSE	Promoter (<=1kb)	chr12	105032689	105040910	8222	+	73046	uc007oxu.1	325	ENSMUSG00000021102	Glrx5	glutaredoxin 5 homolog (S. cerevisiae)
369	chr12	110447219	110447364	146	*	0.00126897	0.00175075	0.0863888	-0.0846381	1.92441e-05	2.62545e-05	0.000858517	-0.000832154	TRUE	Promoter (<=1kb)	chr12	110447179	110450997	3819	+	26931	uc007pbj.2	185	ENSMUSG00000017843	Ppp2r5c	protein phosphatase 2, regulatory subunit B', gamma
370	chr12	110447219	110447364	146	*	2.03955e-05	0.00110431	3.30709e-05	0.00107124	1.92441e-05	2.62545e-05	0.000858517	-0.000832154	FALSE	Promoter (<=1kb)	chr12	110447179	110450997	3819	+	26931	uc007pbj.2	185	ENSMUSG00000017843	Ppp2r5c	protein phosphatase 2, regulatory subunit B', gamma
371	chr12	110447399	110447459	61	*	2.03955e-05	0.00110431	3.30709e-05	0.00107124	4.91042e-06	0.00143443	3.10292e-05	0.00140378	TRUE	Promoter (<=1kb)	chr12	110447179	110450997	3819	+	26931	uc007pbj.2	280	ENSMUSG00000017843	Ppp2r5c	protein phosphatase 2, regulatory subunit B', gamma
372	chr12	110840635	110840792	158	*	0.00329394	0.0203054	0.000902811	0.0194026	3.35917e-07	0.319647	0.00187293	0.314392	TRUE	Promoter (<=1kb)	chr12	110807798	110840939	33142	-	26448	uc007pbv.1	147	ENSMUSG00000056458	Mok	MOK protein kinase
373	chr12	110840866	110840964	99	*	4.65302e-05	0.00329869	5.4905e-05	0.00324379	3.48964e-06	0.0012337	0.266545	-0.262918	FALSE	Promoter (<=1kb)	chr12	110807798	110840939	33142	-	26448	uc007pbv.1	0	ENSMUSG00000056458	Mok	MOK protein kinase
374	chr12	112722348	112722468	121	*	3.78267e-06	0.00185069	4.40685e-05	0.00180662	2.13388e-09	2.70004e-05	0.00208737	-0.00205948	FALSE	Promoter (<=1kb)	chr12	112722174	112746591	24418	+	217882	uc007pfb.1	294	ENSMUSG00000072825	Cep170b	centrosomal protein 170B
375	chr12	112722348	112722468	121	*	1.91365e-07	4.86453e-05	0.00481913	-0.00477049	2.13388e-09	2.70004e-05	0.00208737	-0.00205948	TRUE	Promoter (<=1kb)	chr12	112722174	112746591	24418	+	217882	uc007pfb.1	294	ENSMUSG00000072825	Cep170b	centrosomal protein 170B
376	chr13	9094716	9094724	9	*	0.000215429	3.10928e-05	0.000942637	-0.000912488	1.70972e-06	0.00405762	0.300173	-0.296115	TRUE	Promoter (<=1kb)	chr13	9093905	9173090	79186	+	217980	uc007pkr.1	819	ENSMUSG00000033499	Larp4b	La ribonucleoprotein domain family, member 4B
377	chr13	14063788	14063812	25	*	1.36201e-06	0.00110752	3.1834e-05	0.00107599	7.79129e-06	0.00171533	3.92935e-05	0.00167604	TRUE	Promoter (<=1kb)	chr13	14063784	14165682	101899	+	94246	uc007pmy.2	28	ENSMUSG00000039219	Arid4b	AT rich interactive domain 4B (RBP1-like)
378	chr13	17803553	17803751	199	*	0.00016902	0.0114514	0.000230441	0.011221	1.93278e-05	7.44536e-05	0.00562302	-0.00555618	FALSE	Promoter (1-2kb)	chr13	17715962	17805097	89136	-	69562	uc007poc.2	1346	ENSMUSG00000041297	Cdk13	cyclin-dependent kinase 13
379	chr13	17805391	17805431	41	*	1.05289e-10	0.00748889	4.19954e-05	0.00744689	9.31371e-12	2.83004e-05	0.00349809	-0.00346979	FALSE	Promoter (<=1kb)	chr13	17715962	17805097	89136	-	69562	uc007poc.2	-294	ENSMUSG00000041297	Cdk13	cyclin-dependent kinase 13
380	chr13	21945239	21945284	46	*	5.95054e-07	3.05163e-05	0.00136786	-0.00133729	9.52206e-05	0.000766851	0.0423528	-0.0415859	TRUE	Promoter (<=1kb)	chr13	21945094	21960485	15392	+	193452	uc007pry.1	190	ENSMUSG00000006720	Zfp184	zinc finger protein 184 (Kruppel-like)
381	chr13	24802233	24802283	51	*	0.000235522	0.00235427	7.59817e-05	0.00227829	5.69656e-11	0.0115954	2.86964e-05	0.0115667	TRUE	Promoter (<=1kb)	chr13	24801657	24812899	11243	+	79555	uc007pwi.1	626	ENSMUSG00000019132	BC005537	cDNA sequence BC005537
382	chr13	34163062	34163108	47	*	5.33199e-05	0.0189517	0.000254451	0.0186973	3.93324e-05	0.00965396	0.284163	-0.274509	FALSE	Promoter (<=1kb)	chr13	34162964	34178172	15209	+	69666	uc007qbe.3	144	ENSMUSG00000071451	Psmg4	proteasome (prosome, macropain) assembly chaperone 4
383	chr13	35740996	35741003	8	*	1.09787e-11	0.00383866	3.99899e-05	0.0038073	5.19334e-15	0.000266283	0.346431	-0.346164	FALSE	Promoter (<=1kb)	chr13	35741402	35874064	132663	+	12593	uc007qcg.2	-406	ENSMUSG00000059288	Cdyl	chromodomain protein, Y chromosome-like
384	chr13	35741197	35741213	17	*	1.32308e-08	0.382889	0.00661595	0.376264	7.42724e-12	0.000686566	0.345474	-0.344787	FALSE	Promoter (<=1kb)	chr13	35741402	35874064	132663	+	12593	uc007qcg.2	-205	ENSMUSG00000059288	Cdyl	chromodomain protein, Y chromosome-like
385	chr13	35741821	35741905	85	*	2.46602e-07	3.01671e-05	0.00151843	-0.00148826	1.31937e-06	2.56478e-05	0.00143374	-0.0014081	TRUE	Promoter (<=1kb)	chr13	35741402	35874064	132663	+	12593	uc007qcg.2	503	ENSMUSG00000059288	Cdyl	chromodomain protein, Y chromosome-like
386	chr13	35742249	35742299	51	*	0.00103276	0.100887	0.00619434	0.0946924	5.21439e-12	0.346193	0.000723671	0.345469	TRUE	Promoter (<=1kb)	chr13	35741402	35874064	132663	+	12593	uc007qcg.2	897	ENSMUSG00000059288	Cdyl	chromodomain protein, Y chromosome-like
387	chr13	41249635	41249700	66	*	0.000183647	0.000242591	0.0193059	-0.0190633	0.000116634	0.000157066	0.00609615	-0.00593909	TRUE	Promoter (<=1kb)	chr13	41249844	41276577	26734	+	108934	uc007qfc.2	-209	ENSMUSG00000091264	Smim13	small integral membrane protein 13
388	chr13	41249635	41249700	66	*	1.42008e-05	0.367206	0.00866261	0.358543	0.000116634	0.000157066	0.00609615	-0.00593909	FALSE	Promoter (<=1kb)	chr13	41249844	41276577	26734	+	108934	uc007qfc.2	-209	ENSMUSG00000091264	Smim13	small integral membrane protein 13
389	chr13	43559974	43559991	18	*	7.3266e-08	0.00291386	3.19929e-05	0.00288392	1.7455e-13	0.343087	0.000407897	0.342679	TRUE	Promoter (<=1kb)	chr13	43538406	43560191	21786	-	76137	uc007qgf.2	200	ENSMUSG00000021371	Mcur1	mitochondrial calcium uniporter regulator 1
390	chr13	45964019	45964020	2	*	3.99438e-13	0.384861	0.000610076	0.384251	0.00335855	0.000421202	0.00850931	-0.00808811	FALSE	Promoter (<=1kb)	chr13	45549756	45964991	415236	-	20238	uc011yyv.2	971	ENSMUSG00000046876	Atxn1	ataxin 1
391	chr13	46727922	46728017	96	*	3.50626e-13	0.384755	0.000598011	0.384167	5.44805e-06	3.35997e-05	0.00167878	-0.00164518	FALSE	Promoter (<=1kb)	chr13	46679902	46727849	47948	-	218210	uc007qhj.2	-73	ENSMUSG00000021374	Nup153	nucleoporin 153
392	chr13	54621793	54621834	42	*	5.22704e-06	4.67192e-05	0.00499245	-0.00494573	1.02043e-10	0.00125556	0.344321	-0.34307	TRUE	Promoter (<=1kb)	chr13	54621784	54644609	22826	+	76577	uc007qop.2	50	ENSMUSG00000025873	Faf2	Fas associated factor family member 2
393	chr13	55362796	55362796	1	*	1.3524e-05	4.71581e-05	0.00411378	-0.00406656	0.000740184	0.000444664	0.0132315	-0.0127868	TRUE	Promoter (<=1kb)	chr13	55343833	55362783	18951	-	66890	uc007qqo.1	-13	ENSMUSG00000021484	Lman2	lectin, mannose-binding 2
394	chr13	58402550	58402552	3	*	4.15868e-06	0.00480846	6.89917e-05	0.00473946	0.000148578	0.00469015	0.000102463	0.00458769	TRUE	Promoter (<=1kb)	chr13	58391132	58402512	11381	-	15387	uc007qts.3	-38	ENSMUSG00000021546	Hnrnpk	heterogeneous nuclear ribonucleoprotein K
395	chr13	58402774	58402779	6	*	6.08978e-12	0.38501	0.00111044	0.3839	6.52338e-05	0.000527355	2.51563e-05	0.000502198	TRUE	Promoter (<=1kb)	chr13	58402597	58411149	8553	+	74386	uc007qub.2	182	ENSMUSG00000035367	Rmi1	RMI1, RecQ mediated genome instability 1
396	chr13	58402793	58402793	1	*	6.08978e-12	0.38501	0.00111044	0.3839	8.837e-12	0.000695164	0.342273	-0.341578	FALSE	Promoter (<=1kb)	chr13	58402597	58411149	8553	+	74386	uc007qub.2	196	ENSMUSG00000035367	Rmi1	RMI1, RecQ mediated genome instability 1
397	chr13	58402797	58402797	1	*	6.08978e-12	0.38501	0.00111044	0.3839	3.65406e-05	0.000747358	2.69185e-05	0.000720439	TRUE	Promoter (<=1kb)	chr13	58402597	58411149	8553	+	74386	uc007qub.2	200	ENSMUSG00000035367	Rmi1	RMI1, RecQ mediated genome instability 1
398	chr13	58402805	58402805	1	*	2.58118e-07	3.14234e-05	0.00201329	-0.00198187	4.99652e-11	0.000882912	0.33964	-0.338757	TRUE	Promoter (<=1kb)	chr13	58402597	58411149	8553	+	74386	uc007qub.2	208	ENSMUSG00000035367	Rmi1	RMI1, RecQ mediated genome instability 1
399	chr13	58402809	58402809	1	*	2.50804e-08	0.38261	0.00376936	0.378841	3.09285e-05	0.000973723	2.96093e-05	0.000944114	TRUE	Promoter (<=1kb)	chr13	58402597	58411149	8553	+	74386	uc007qub.2	212	ENSMUSG00000035367	Rmi1	RMI1, RecQ mediated genome instability 1
400	chr13	58402816	58402816	1	*	2.50804e-08	0.38261	0.00376936	0.378841	1.34733e-10	0.00101479	0.337874	-0.336859	FALSE	Promoter (<=1kb)	chr13	58402597	58411149	8553	+	74386	uc007qub.2	219	ENSMUSG00000035367	Rmi1	RMI1, RecQ mediated genome instability 1
401	chr13	58402826	58402826	1	*	2.50804e-08	0.38261	0.00376936	0.378841	2.45608e-05	0.00110042	3.03277e-05	0.00107009	TRUE	Promoter (<=1kb)	chr13	58402597	58411149	8553	+	74386	uc007qub.2	229	ENSMUSG00000035367	Rmi1	RMI1, RecQ mediated genome instability 1
402	chr13	58402832	58402832	1	*	2.50804e-08	0.38261	0.00376936	0.378841	3.66458e-10	0.00117825	0.336548	-0.33537	FALSE	Promoter (<=1kb)	chr13	58402597	58411149	8553	+	74386	uc007qub.2	235	ENSMUSG00000035367	Rmi1	RMI1, RecQ mediated genome instability 1
403	chr13	58402834	58402834	1	*	2.50804e-08	0.38261	0.00376936	0.378841	2.14542e-05	0.0012114	3.11316e-05	0.00118027	TRUE	Promoter (<=1kb)	chr13	58402597	58411149	8553	+	74386	uc007qub.2	237	ENSMUSG00000035367	Rmi1	RMI1, RecQ mediated genome instability 1
404	chr13	58402839	58402843	5	*	2.50804e-08	0.38261	0.00376936	0.378841	1.02699e-09	0.00136605	0.33464	-0.333274	FALSE	Promoter (<=1kb)	chr13	58402597	58411149	8553	+	74386	uc007qub.2	246	ENSMUSG00000035367	Rmi1	RMI1, RecQ mediated genome instability 1
405	chr13	58402858	58402858	1	*	2.98962e-06	6.89392e-05	0.00523493	-0.00516599	1.92946e-05	0.00188633	3.85678e-05	0.00184777	FALSE	Promoter (<=1kb)	chr13	58402597	58411149	8553	+	74386	uc007qub.2	261	ENSMUSG00000035367	Rmi1	RMI1, RecQ mediated genome instability 1
406	chr13	59769577	59769611	35	*	5.67596e-07	4.05656e-05	0.0097159	-0.00967559	1.34327e-11	0.33995	0.000736971	0.339213	FALSE	Promoter (<=1kb)	chr13	59755415	59769789	14375	-	69046	uc007qvd.1	178	ENSMUSG00000044792	Isca1	iron-sulfur cluster assembly 1 homolog (S. cerevisiae)
407	chr13	64153428	64153482	55	*	3.13766e-12	0.385245	0.000815808	0.384429	4.57498e-07	0.300387	0.00290173	0.29722	TRUE	Promoter (<=1kb)	chr13	64133057	64153199	20143	-	238673	uc007qyj.1	-229	ENSMUSG00000044934	Zfp367	zinc finger protein 367
408	chr13	73603874	73603895	22	*	0.00263378	0.0189371	0.305427	-0.28649	2.96903e-06	0.00563813	0.326282	-0.320732	TRUE	Promoter (<=1kb)	chr13	73604002	73620639	16638	+	218335	uc007rdo.2	-128	ENSMUSG00000021610	Clptm1l	CLPTM1-like
409	chr13	73763632	73763713	82	*	1.49588e-06	3.44261e-05	0.00169169	-0.00165727	1.12385e-07	3.55948e-05	0.00418405	-0.00414845	TRUE	Promoter (<=1kb)	chr13	73763697	73812358	48662	+	20499	uc007reb.1	0	ENSMUSG00000017756	Slc12a7	solute carrier family 12, member 7
410	chr13	92610937	92611053	117	*	7.76791e-08	0.403115	0.00374686	0.39898	8.41579e-10	0.343135	0.00149585	0.341632	TRUE	Promoter (<=1kb)	chr13	92611138	92686193	75056	+	218442	uc007rks.1	-201	ENSMUSG00000021703	Serinc5	serine incorporator 5
411	chr13	96670977	96670984	8	*	0.000163175	0.00211015	6.6077e-05	0.00204407	0.000324371	0.000192597	0.0079881	-0.0077955	FALSE	Promoter (<=1kb)	chr13	96648962	96670936	21975	-	15357	uc007rnm.3	-41	ENSMUSG00000021670	Hmgcr	3-hydroxy-3-methylglutaryl-Coenzyme A reductase
412	chr13	98815098	98815218	121	*	3.70499e-05	0.000816864	3.26503e-05	0.000784372	3.50088e-06	0.00132459	3.50781e-05	0.00128952	TRUE	Promoter (<=1kb)	chr13	98723406	98815449	92044	-	218503	uc033gnc.1	231	ENSMUSG00000041685	Fcho2	FCH domain only 2
413	chr13	98815348	98815355	8	*	1.46732e-08	0.00235793	3.35866e-05	0.00232435	0.0011946	0.0222774	0.000850118	0.0213972	TRUE	Promoter (<=1kb)	chr13	98723406	98815449	92044	-	218503	uc033gnc.1	94	ENSMUSG00000041685	Fcho2	FCH domain only 2
414	chr13	98890340	98890413	74	*	8.12929e-07	0.00153554	3.26344e-05	0.00150124	1.2112e-08	0.342409	0.00317437	0.339514	TRUE	Promoter (<=1kb)	chr13	98842081	98890998	48918	-	238799	uc007rpd.1	585	ENSMUSG00000009470	Tnpo1	transportin 1
415	chr13	98890523	98890685	163	*	8.12929e-07	0.00153554	3.26344e-05	0.00150124	5.91265e-06	0.000778684	2.3341e-05	0.000755517	TRUE	Promoter (<=1kb)	chr13	98842081	98890998	48918	-	238799	uc007rpd.1	313	ENSMUSG00000009470	Tnpo1	transportin 1
416	chr13	103921573	103921604	32	*	3.40079e-05	0.00111787	3.67625e-05	0.00108177	1.32476e-07	0.328974	0.00431872	0.324656	TRUE	Promoter (<=1kb)	chr13	103818786	103920586	101801	-	59079	uc007rsk.3	-987	ENSMUSG00000021709	Erbb2ip	Erbb2 interacting protein
417	chr13	118387226	118387296	71	*	3.26049e-10	0.376844	0.00142077	0.375423	3.61253e-06	0.000183304	0.0123214	-0.0121381	FALSE	Promoter (<=1kb)	chr13	118380110	118387252	7143	-	59054	uc007ryr.1	0	ENSMUSG00000021731	Mrps30	mitochondrial ribosomal protein S30
418	chr13	119791027	119791027	1	*	0.000658979	0.000287288	3.04957e-05	0.000256792	0.00233917	0.00927237	0.183135	-0.173863	FALSE	Promoter (<=1kb)	chr13	119765186	119791122	25937	-	72465	uc007rzn.2	95	ENSMUSG00000094870	Zfp131	zinc finger protein 131
419	chr13	119791143	119791264	122	*	1.76423e-08	0.385216	0.00363863	0.381577	2.55932e-05	0.0160835	0.000221831	0.0160331	TRUE	Promoter (<=1kb)	chr13	119765186	119791122	25937	-	72465	uc007rzn.2	-21	ENSMUSG00000094870	Zfp131	zinc finger protein 131
420	chr13	119791143	119791264	122	*	8.9143e-08	3.04238e-05	0.00427369	-0.00424326	2.55932e-05	0.0160835	0.000221831	0.0160331	FALSE	Promoter (<=1kb)	chr13	119765186	119791122	25937	-	72465	uc007rzn.2	-21	ENSMUSG00000094870	Zfp131	zinc finger protein 131
421	chr13	119791143	119791264	122	*	5.4908e-08	0.381582	0.00397995	0.37731	2.55932e-05	0.0160835	0.000221831	0.0160331	TRUE	Promoter (<=1kb)	chr13	119765186	119791122	25937	-	72465	uc007rzn.2	-21	ENSMUSG00000094870	Zfp131	zinc finger protein 131
422	chr13	119962030	119962079	50	*	3.61005e-06	0.00438313	4.94801e-05	0.00433365	1.57331e-08	2.39555e-05	0.0026943	-0.0026705	FALSE	Distal Intergenic	chr13	119949357	119950806	1450	-	333467	uc029sdq.1	-11224	ENSMUSG00000078537	B020031M17Rik	RIKEN cDNA B020031M17 gene
423	chr14	7488472	7488521	50	*	1.01458e-05	3.99529e-05	0.00362548	-0.00358553	3.99065e-06	0.000121303	0.0134915	-0.0133702	TRUE	Intron (uc007seb.1/uc007seb.1, intron 3 of 3)	chr14	7471005	7551894	80890	-	100041874	uc007seg.2	63373	ENSMUSG00000079364	Gm3558	predicted gene 3558
424	chr14	7817951	7818005	55	*	7.40944e-11	0.00451014	3.73656e-05	0.00447277	5.22634e-09	0.00238254	0.334534	-0.332151	FALSE	Promoter (<=1kb)	chr14	7817957	7882418	64462	+	286940	uc007sej.1	0	ENSMUSG00000025278	Flnb	filamin, beta
425	chr14	20694957	20695075	119	*	3.6583e-05	4.09993e-05	0.00189135	-0.00185035	1.57435e-06	0.00106232	2.9621e-05	0.00103083	FALSE	Promoter (<=1kb)	chr14	20694968	20700197	5230	+	73068	uc007skk.1	0	ENSMUSG00000039357	Fut11	fucosyltransferase 11
426	chr14	21052539	21052560	22	*	4.10004e-05	0.00156848	4.25887e-05	0.00152579	0.00108126	0.0215169	0.000950871	0.020566	TRUE	Promoter (<=1kb)	chr14	21052574	21053921	1348	+	11534	uc007slb.2	-35	ENSMUSG00000039197	Adk	adenosine kinase
427	chr14	21831682	21831692	11	*	1.37594e-05	0.320071	0.00656777	0.313504	2.68045e-08	0.0064726	4.97128e-05	0.00642288	TRUE	Promoter (<=1kb)	chr14	21831561	21845879	14319	+	22334	uc007sls.1	131	ENSMUSG00000021771	Vdac2	voltage-dependent anion channel 2
428	chr14	21987395	21987443	49	*	2.02931e-09	0.0141661	4.80958e-05	0.014118	2.29827e-09	0.000123632	0.0219182	-0.0217963	FALSE	Promoter (2-3kb)	chr14	21983962	21989601	5640	-	218820	uc007slv.1	2158	ENSMUSG00000039081	Zfp503	zinc finger protein 503
429	chr14	24490956	24491042	87	*	0.000106529	0.000479805	3.03556e-05	0.000449449	3.141e-06	0.000794497	2.93112e-05	0.000767018	TRUE	Promoter (<=1kb)	chr14	24490681	24495858	5178	+	20088	uc007sra.1	361	ENSMUSG00000025290	Rps24	ribosomal protein S24
430	chr14	30626124	30626297	174	*	2.56468e-06	0.004425	5.64729e-05	0.00436853	6.32214e-09	0.341007	0.0019488	0.33866	TRUE	Promoter (<=1kb)	chr14	30595354	30626208	30855	-	18753	uc007svh.2	0	ENSMUSG00000021948	Prkcd	protein kinase C, delta
431	chr14	31251375	31251424	50	*	8.40485e-12	0.384694	0.000929998	0.38368	4.40146e-06	0.0059755	0.31585	-0.309874	FALSE	Promoter (<=1kb)	chr14	31251489	31259929	8441	+	104416	uc007sxh.1	-114	ENSMUSG00000021901	Bap1	Brca1 associated protein 1
432	chr14	31494991	31495062	72	*	4.59515e-05	0.00126475	4.15799e-05	0.00122	8.11414e-08	0.00353845	0.333034	-0.329625	FALSE	Promoter (<=1kb)	chr14	31478798	31494977	16180	-	67011	uc007sxq.1	-14	ENSMUSG00000021891	Mettl6	methyltransferase like 6
433	chr14	32165631	32165755	125	*	1.61702e-11	0.385068	0.00100635	0.384062	2.28863e-05	0.257677	0.00580647	0.251557	TRUE	Promoter (<=1kb)	chr14	32165789	32179855	14067	+	27057	uc007sym.2	-158	ENSMUSG00000056234	Ncoa4	nuclear receptor coactivator 4
434	chr14	32165631	32165755	125	*	2.05815e-06	4.06185e-05	0.00698206	-0.00693797	2.28863e-05	0.257677	0.00580647	0.251557	FALSE	Promoter (<=1kb)	chr14	32165789	32179855	14067	+	27057	uc007sym.2	-158	ENSMUSG00000056234	Ncoa4	nuclear receptor coactivator 4
435	chr14	32201990	32202008	19	*	0.00171544	0.000105012	0.00366722	-0.00356221	4.66439e-08	0.340858	0.00339915	0.337458	FALSE	Promoter (<=1kb)	chr14	32201971	32209674	7704	+	26430	uc007syo.3	37	ENSMUSG00000021911	Parg	poly (ADP-ribose) glycohydrolase
436	chr14	32202146	32202253	108	*	2.1515e-12	0.384028	0.000992721	0.383035	0.000374981	0.010733	0.000610333	0.0101112	TRUE	Promoter (<=1kb)	chr14	32201971	32209674	7704	+	26430	uc007syo.3	282	ENSMUSG00000021911	Parg	poly (ADP-ribose) glycohydrolase
437	chr14	46883477	46883561	85	*	4.34488e-07	0.00887396	6.3124e-05	0.00881083	3.68017e-10	0.0176959	8.23684e-05	0.0176286	TRUE	Promoter (<=1kb)	chr14	46882965	47105817	222853	+	74480	uc007thn.2	596	ENSMUSG00000021838	Samd4	sterile alpha motif domain containing 4
438	chr14	52014389	52014389	1	*	7.88057e-05	3.9258e-05	0.00180188	-0.00176135	1.52263e-05	4.14666e-05	0.00203135	-0.00198988	TRUE	Promoter (<=1kb)	chr14	52006075	52014558	8484	-	69890	uc007tnv.3	169	ENSMUSG00000049295	Zfp219	zinc finger protein 219
439	chr14	52014395	52014403	9	*	7.88057e-05	3.9258e-05	0.00180188	-0.00176135	2.33869e-10	0.339792	0.00119587	0.338596	FALSE	Promoter (<=1kb)	chr14	52006075	52014558	8484	-	69890	uc007tnv.3	155	ENSMUSG00000049295	Zfp219	zinc finger protein 219
440	chr14	52014413	52014419	7	*	7.88057e-05	3.9258e-05	0.00180188	-0.00176135	6.85504e-05	2.32294e-05	0.000371475	-0.000348246	TRUE	Promoter (<=1kb)	chr14	52006075	52014558	8484	-	69890	uc007tnv.3	139	ENSMUSG00000049295	Zfp219	zinc finger protein 219
441	chr14	52019911	52020041	131	*	1.11577e-07	0.00406577	3.75411e-05	0.00402823	2.78846e-11	0.338299	0.000664535	0.335445	TRUE	Promoter (<=1kb)	chr14	52006075	52019713	13639	-	69890	uc007tnw.3	-198	ENSMUSG00000049295	Zfp219	zinc finger protein 219
442	chr14	52020114	52020261	148	*	1.11577e-07	0.00406577	3.75411e-05	0.00402823	8.18646e-05	6.37239e-05	0.00318115	-0.00310829	FALSE	Promoter (<=1kb)	chr14	52006075	52019713	13639	-	69890	uc007tnw.3	-401	ENSMUSG00000049295	Zfp219	zinc finger protein 219
443	chr14	54576721	54576851	131	*	0.00121781	0.0196648	0.000952763	0.018712	2.86555e-12	0.00063115	0.342596	-0.341982	FALSE	Promoter (<=1kb)	chr14	54567469	54577661	10193	-	16475	uc007twj.2	810	ENSMUSG00000022178	Ajuba	ajuba LIM protein
444	chr14	54577421	54577649	229	*	2.49155e-05	3.3216e-05	0.00158131	-0.00154809	4.44096e-07	0.00452724	0.337891	-0.332931	TRUE	Promoter (<=1kb)	chr14	54567469	54577661	10193	-	16475	uc007twj.2	12	ENSMUSG00000022178	Ajuba	ajuba LIM protein
445	chr14	54577421	54577649	229	*	4.4751e-08	0.381328	0.00335427	0.377989	4.44096e-07	0.00452724	0.337891	-0.332931	FALSE	Promoter (<=1kb)	chr14	54567469	54577661	10193	-	16475	uc007twj.2	12	ENSMUSG00000022178	Ajuba	ajuba LIM protein
446	chr14	54577421	54577649	229	*	3.78695e-06	3.81698e-05	0.00408237	-0.0040442	4.44096e-07	0.00452724	0.337891	-0.332931	TRUE	Promoter (<=1kb)	chr14	54567469	54577661	10193	-	16475	uc007twj.2	12	ENSMUSG00000022178	Ajuba	ajuba LIM protein
447	chr14	54577421	54577649	229	*	6.11226e-08	0.381299	0.00362566	0.377674	4.44096e-07	0.00452724	0.337891	-0.332931	FALSE	Promoter (<=1kb)	chr14	54567469	54577661	10193	-	16475	uc007twj.2	12	ENSMUSG00000022178	Ajuba	ajuba LIM protein
448	chr14	55491101	55491166	66	*	2.13e-05	0.00109364	3.82592e-05	0.00105523	0.000739387	0.00360616	0.000113533	0.00349263	TRUE	Promoter (<=1kb)	chr14	55491093	55508264	17172	+	268747	uc007tyo.1	73	ENSMUSG00000022211	Lrrc16b	leucine rich repeat containing 16B
449	chr14	55491180	55491180	1	*	2.13e-05	0.00109364	3.82592e-05	0.00105523	0.000358931	0.00491954	0.168314	-0.163395	FALSE	Promoter (<=1kb)	chr14	55491093	55508264	17172	+	268747	uc007tyo.1	87	ENSMUSG00000022211	Lrrc16b	leucine rich repeat containing 16B
450	chr14	55491183	55491183	1	*	2.13e-05	0.00109364	3.82592e-05	0.00105523	1.68652e-06	0.00226436	2.88296e-05	0.00223553	TRUE	Promoter (<=1kb)	chr14	55491093	55508264	17172	+	268747	uc007tyo.1	90	ENSMUSG00000022211	Lrrc16b	leucine rich repeat containing 16B
451	chr14	55491186	55491192	7	*	2.13e-05	0.00109364	3.82592e-05	0.00105523	1.04273e-08	0.00217844	0.339713	-0.337534	FALSE	Promoter (<=1kb)	chr14	55491093	55508264	17172	+	268747	uc007tyo.1	99	ENSMUSG00000022211	Lrrc16b	leucine rich repeat containing 16B
452	chr14	55643255	55643278	24	*	1.29576e-07	4.03483e-05	0.0072887	-0.00724816	2.7064e-08	0.340968	0.00304694	0.337921	FALSE	Promoter (<=1kb)	chr14	55638488	55643251	4764	-	74140	uc007tzu.1	-4	ENSMUSG00000002320	Tm9sf1	transmembrane 9 superfamily member 1
453	chr14	55643555	55643586	32	*	0.000176637	0.00427446	0.148422	-0.144147	0.000403487	0.19791	0.00603344	0.191877	FALSE	Promoter (<=1kb)	chr14	55635966	55643371	7406	-	74140	uc007tzs.1	-184	ENSMUSG00000002320	Tm9sf1	transmembrane 9 superfamily member 1
454	chr14	55643555	55643586	32	*	2.25319e-07	0.378545	0.0044352	0.374109	0.000403487	0.19791	0.00603344	0.191877	TRUE	Promoter (<=1kb)	chr14	55635966	55643371	7406	-	74140	uc007tzs.1	-184	ENSMUSG00000002320	Tm9sf1	transmembrane 9 superfamily member 1
455	chr14	55643903	55643903	1	*	3.7824e-10	0.381131	0.00153328	0.379598	9.22265e-13	0.00816879	3.39023e-05	0.00813488	TRUE	Promoter (<=1kb)	chr14	55635966	55643806	7841	-	74140	uc007tzt.1	-97	ENSMUSG00000002320	Tm9sf1	transmembrane 9 superfamily member 1
456	chr14	55643921	55643921	1	*	3.7824e-10	0.381131	0.00153328	0.379598	2.75067e-07	0.00625752	0.341438	-0.33518	FALSE	Promoter (<=1kb)	chr14	55635966	55643806	7841	-	74140	uc007tzt.1	-115	ENSMUSG00000002320	Tm9sf1	transmembrane 9 superfamily member 1
457	chr14	55643925	55643949	25	*	3.7824e-10	0.381131	0.00153328	0.379598	6.93692e-14	0.00559685	2.67319e-05	0.00557023	TRUE	Promoter (<=1kb)	chr14	55635966	55643806	7841	-	74140	uc007tzt.1	-119	ENSMUSG00000002320	Tm9sf1	transmembrane 9 superfamily member 1
458	chr14	55721774	55721789	16	*	2.84987e-05	0.2082	0.00393818	0.204262	2.82009e-08	0.324191	0.00266971	0.321522	TRUE	Promoter (<=1kb)	chr14	55715877	55722176	6300	-	56187	uc007uai.1	387	ENSMUSG00000040472	Rabggta	Rab geranylgeranyl transferase, a subunit
459	chr14	56886533	56886555	23	*	3.83159e-06	0.0010766	3.42145e-05	0.00104238	1.96467e-09	0.341676	0.00248324	0.339193	TRUE	Promoter (<=1kb)	chr14	56886653	56903868	17216	+	76007	uc007ucr.1	-120	ENSMUSG00000021945	Zmym2	zinc finger, MYM-type 2
460	chr14	58072235	58072315	81	*	1.77608e-10	0.384159	0.00262098	0.381546	1.29957e-09	2.66391e-05	0.00324395	-0.00321731	FALSE	Promoter (<=1kb)	chr14	58072686	58112720	40035	+	14180	uc007udx.2	-451	ENSMUSG00000021974	Fgf9	fibroblast growth factor 9
461	chr14	59440912	59440936	25	*	0.0025578	3.90998e-05	0.000388654	-0.000349554	0.000197252	0.00361387	0.000126999	0.00348687	FALSE	Promoter (<=1kb)	chr14	59355140	59440877	85738	-	239122	uc011zmm.1	-35	ENSMUSG00000071350	Setdb2	SET domain, bifurcated 2
462	chr14	70153360	70153409	50	*	4.4526e-08	0.383287	0.00331075	0.37952	0.000260963	0.229964	0.00531151	0.224652	TRUE	Promoter (<=1kb)	chr14	70138169	70153791	15623	-	219158	uc007unf.1	382	ENSMUSG00000033712	Ccar2	cell cycle activator and apoptosis regulator 2
463	chr14	70153417	70153417	1	*	4.4526e-08	0.383287	0.00331075	0.37952	0.000918516	2.44483e-05	0.000202216	-0.000177767	FALSE	Promoter (<=1kb)	chr14	70138169	70153791	15623	-	219158	uc007unf.1	374	ENSMUSG00000033712	Ccar2	cell cycle activator and apoptosis regulator 2
464	chr14	70351392	70351452	61	*	1.59449e-06	0.00526707	7.39906e-05	0.00519308	8.36198e-10	0.00157088	0.329834	-0.328263	FALSE	Promoter (<=1kb)	chr14	70303467	70351424	47958	-	213053	uc007unt.1	0	ENSMUSG00000022094	Slc39a14	solute carrier family 39 (zinc transporter), member 14
465	chr14	75844843	75845007	165	*	1.19676e-10	0.381997	0.00112962	0.380867	1.11934e-07	0.321243	0.00513766	0.316127	TRUE	Promoter (<=1kb)	chr14	75842918	75844964	2047	-	100043189	uc029sly.1	0	#N/A	Gm4285	predicted gene 4285
466	chr14	75845724	75845802	79	*	5.20255e-07	0.00247216	4.90297e-05	0.00242337	2.00278e-07	2.34785e-05	0.0011278	-0.00110445	FALSE	Promoter (<=1kb)	chr14	75845256	75848303	3048	+	22070	uc007uqz.2	546	ENSMUSG00000060126	Tpt1	tumor protein, translationally-controlled 1
467	chr14	75846008	75846097	90	*	8.439e-05	0.00110969	3.99697e-05	0.00106972	1.05562e-06	0.000100278	0.0104884	-0.0103889	FALSE	Promoter (<=1kb)	chr14	75845256	75848303	3048	+	22070	uc007uqz.2	841	ENSMUSG00000060126	Tpt1	tumor protein, translationally-controlled 1
468	chr14	76556333	76556492	160	*	8.11158e-12	0.385077	0.000914127	0.384163	1.2246e-08	0.00180622	0.316974	-0.315161	FALSE	Promoter (<=1kb)	chr14	76532812	76556687	23876	-	72661	uc011zor.1	195	ENSMUSG00000052584	Serp2	stress-associated endoplasmic reticulum protein family member 2
469	chr14	76556333	76556492	160	*	4.85027e-06	3.08038e-05	0.00236223	-0.00233142	1.2246e-08	0.00180622	0.316974	-0.315161	TRUE	Promoter (<=1kb)	chr14	76532812	76556687	23876	-	72661	uc011zor.1	195	ENSMUSG00000052584	Serp2	stress-associated endoplasmic reticulum protein family member 2
470	chr14	76556333	76556492	160	*	1.66177e-08	0.384473	0.00310406	0.381315	1.2246e-08	0.00180622	0.316974	-0.315161	FALSE	Promoter (<=1kb)	chr14	76532812	76556687	23876	-	72661	uc011zor.1	195	ENSMUSG00000052584	Serp2	stress-associated endoplasmic reticulum protein family member 2
471	chr14	87417332	87417336	5	*	2.4466e-07	0.00341241	3.87389e-05	0.00337368	2.91471e-08	0.00356119	0.342644	-0.339083	FALSE	Promoter (<=1kb)	chr14	87416583	87515192	98610	+	219249	uc007uuf.3	753	ENSMUSG00000022019	Tdrd3	tudor domain containing 3
472	chr14	103346128	103346128	1	*	3.59733e-05	0.00192673	4.42231e-05	0.0018825	0.000132774	0.000168969	2.29163e-05	0.000146052	TRUE	Promoter (<=1kb)	chr14	103113411	103346800	233390	-	105689	uc007uwl.1	672	ENSMUSG00000033004	Mycbp2	MYC binding protein 2
473	chr14	103346138	103346138	1	*	3.59733e-05	0.00192673	4.42231e-05	0.0018825	2.15071e-13	0.000500206	0.347023	-0.346523	FALSE	Promoter (<=1kb)	chr14	103113411	103346800	233390	-	105689	uc007uwl.1	662	ENSMUSG00000033004	Mycbp2	MYC binding protein 2
474	chr14	103346142	103346156	15	*	3.59733e-05	0.00192673	4.42231e-05	0.0018825	1.287e-06	0.000767422	2.36055e-05	0.000743816	TRUE	Promoter (<=1kb)	chr14	103113411	103346800	233390	-	105689	uc007uwl.1	644	ENSMUSG00000033004	Mycbp2	MYC binding protein 2
475	chr14	103346157	103346157	1	*	3.59733e-05	0.00192673	4.42231e-05	0.0018825	1.85272e-11	0.000950926	0.345889	-0.344938	FALSE	Promoter (<=1kb)	chr14	103113411	103346800	233390	-	105689	uc007uwl.1	643	ENSMUSG00000033004	Mycbp2	MYC binding protein 2
476	chr14	103346176	103346269	94	*	3.59733e-05	0.00192673	4.42231e-05	0.0018825	2.91494e-07	0.00248854	3.10851e-05	0.00245745	TRUE	Promoter (<=1kb)	chr14	103113411	103346800	233390	-	105689	uc007uwl.1	531	ENSMUSG00000033004	Mycbp2	MYC binding protein 2
477	chr14	105258682	105258744	63	*	6.56989e-05	2.99055e-05	0.000872227	-0.000842321	6.2494e-10	0.00365988	2.82661e-05	0.00363283	FALSE	Promoter (<=1kb)	chr14	105258673	105294944	36272	+	76273	uc007uxp.2	71	ENSMUSG00000053253	Ndfip2	Nedd4 family interacting protein 2
478	chr14	115041589	115041663	75	*	1.53611e-05	0.000933509	3.06859e-05	0.00090282	2.44435e-07	2.31287e-05	0.00108387	-0.00106076	FALSE	Promoter (2-3kb)	chr14	115043671	115043754	84	+	723905	uc011zpt.1	-2082	ENSMUSG00000065508	Mir17	microRNA 17
479	chr14	115041877	115041908	32	*	0.00183494	0.000145413	0.00303935	-0.0029005	1.39221e-08	0.341327	0.00278305	0.338544	FALSE	Promoter (1-2kb)	chr14	115043671	115043754	84	+	723905	uc011zpt.1	-1794	ENSMUSG00000065508	Mir17	microRNA 17
480	chr14	115041967	115041981	15	*	0.00183494	0.000145413	0.00303935	-0.0029005	4.36494e-10	0.00144542	0.340114	-0.338668	TRUE	Promoter (1-2kb)	chr14	115043671	115043754	84	+	723905	uc011zpt.1	-1704	ENSMUSG00000065508	Mir17	microRNA 17
481	chr15	4375683	4375751	69	*	9.717e-09	0.384035	0.00231232	0.381642	1.66388e-06	0.000145066	0.0148447	-0.0146996	FALSE	Promoter (<=1kb)	chr15	4375491	4520414	144924	+	239318	uc007vcm.1	260	ENSMUSG00000049148	Plcxd3	phosphatidylinositol-specific phospholipase C, X domain containing 3
482	chr15	5143765	5143872	108	*	6.13708e-05	2.98408e-05	0.000790592	-0.000760845	1.53391e-05	0.000603267	2.32147e-05	0.000580035	FALSE	Promoter (<=1kb)	chr15	5143861	5181899	38039	+	105787	uc007vct.1	0	ENSMUSG00000050697	Prkaa1	protein kinase, AMP-activated, alpha 1 catalytic subunit
483	chr15	6707761	6707789	29	*	1.33163e-07	0.00130874	3.27334e-05	0.00127587	1.83443e-05	0.000280038	0.0203994	-0.0201194	FALSE	Promoter (<=1kb)	chr15	6708381	6758615	50235	+	78757	uc007vdn.2	-620	ENSMUSG00000050310	Rictor	RPTOR independent companion of MTOR, complex 2
484	chr15	12117994	12118068	75	*	0.00024934	3.00772e-05	0.000881628	-0.000851551	1.67807e-05	2.60553e-05	0.000891479	-0.000865424	TRUE	Promoter (<=1kb)	chr15	12117851	12185449	67599	+	22763	uc007vhk.3	217	ENSMUSG00000022201	Zfr	zinc finger RNA binding protein
485	chr15	12118634	12118710	77	*	0.00040376	3.20212e-05	0.000520669	-0.000488648	2.40679e-06	0.00582657	0.304718	-0.298623	TRUE	Promoter (<=1kb)	chr15	12117851	12185449	67599	+	22763	uc007vhk.3	859	ENSMUSG00000022201	Zfr	zinc finger RNA binding protein
486	chr15	12118634	12118710	77	*	0.00078591	0.106558	0.00298928	0.103568	2.40679e-06	0.00582657	0.304718	-0.298623	FALSE	Promoter (<=1kb)	chr15	12117851	12185449	67599	+	22763	uc007vhk.3	859	ENSMUSG00000022201	Zfr	zinc finger RNA binding protein
487	chr15	12205048	12205068	21	*	4.59784e-06	0.00119189	3.07241e-05	0.00116117	1.47651e-05	0.00352399	7.12432e-05	0.00345275	TRUE	Promoter (<=1kb)	chr15	12205094	12272240	67147	+	268783	uc007vhl.1	-46	ENSMUSG00000039458	Mtmr12	myotubularin related protein 12
488	chr15	12205264	12205293	30	*	0.000110096	0.00402746	0.000104314	0.00392315	7.41207e-12	0.00078162	0.347071	-0.346381	FALSE	Promoter (<=1kb)	chr15	12205094	12272240	67147	+	268783	uc007vhl.1	199	ENSMUSG00000039458	Mtmr12	myotubularin related protein 12
489	chr15	12205435	12205544	110	*	6.89915e-05	0.000186533	0.0172381	-0.0170516	6.89683e-08	3.67652e-05	0.00518264	-0.00514803	TRUE	Promoter (<=1kb)	chr15	12205094	12272240	67147	+	268783	uc007vhl.1	450	ENSMUSG00000039458	Mtmr12	myotubularin related protein 12
490	chr15	12205435	12205544	110	*	1.23003e-08	0.378065	0.00249732	0.375568	6.89683e-08	3.67652e-05	0.00518264	-0.00514803	FALSE	Promoter (<=1kb)	chr15	12205094	12272240	67147	+	268783	uc007vhl.1	450	ENSMUSG00000039458	Mtmr12	myotubularin related protein 12
491	chr15	12205435	12205544	110	*	0.000109018	4.34058e-05	0.00174782	-0.00170441	6.89683e-08	3.67652e-05	0.00518264	-0.00514803	TRUE	Promoter (<=1kb)	chr15	12205094	12272240	67147	+	268783	uc007vhl.1	450	ENSMUSG00000039458	Mtmr12	myotubularin related protein 12
492	chr15	12205435	12205544	110	*	8.3056e-11	0.380222	0.00110406	0.379118	6.89683e-08	3.67652e-05	0.00518264	-0.00514803	FALSE	Promoter (<=1kb)	chr15	12205094	12272240	67147	+	268783	uc007vhl.1	450	ENSMUSG00000039458	Mtmr12	myotubularin related protein 12
493	chr15	12321470	12321479	10	*	4.13743e-09	2.96739e-05	0.00463689	-0.00460722	2.56496e-10	0.000840489	0.312459	-0.311619	TRUE	Promoter (<=1kb)	chr15	12321496	12343309	21814	+	66629	uc007vhn.1	-26	ENSMUSG00000022200	Golph3	golgi phosphoprotein 3
494	chr15	31224412	31224461	50	*	6.21643e-05	0.13096	0.00440326	0.123437	6.08717e-11	0.34536	0.00118744	0.344158	TRUE	Promoter (<=1kb)	chr15	31224385	31274338	49954	+	223453	uc007vkc.2	76	ENSMUSG00000039168	Dap	death-associated protein
495	chr15	38473852	38473902	51	*	5.51808e-07	4.62227e-05	0.00459896	-0.00455274	2.55787e-07	0.391855	0.00382171	0.388033	FALSE	Distal Intergenic	chr15	38490473	38490547	75	-	102465574	uc033gto.1	16645	#N/A	Mir6951	microRNA 6951
496	chr15	53346338	53346479	142	*	8.93327e-12	0.383102	0.000615985	0.382177	4.29184e-07	2.57322e-05	0.00264087	-0.00261514	FALSE	Promoter (<=1kb)	chr15	53068261	53346183	277923	-	14042	uc007vrh.2	-155	ENSMUSG00000061731	Ext1	exostoses (multiple) 1
497	chr15	58134500	58134605	106	*	8.98617e-05	0.00731002	0.000135036	0.00717498	0.000166899	0.0102278	0.282559	-0.270055	FALSE	Promoter (<=1kb)	chr15	58094047	58135082	41036	-	70472	uc007vtf.1	477	ENSMUSG00000022360	Atad2	ATPase family, AAA domain containing 2
498	chr15	73512690	73512736	47	*	1.39379e-06	0.379407	0.00628684	0.372809	1.63969e-10	0.00108134	0.320747	-0.319666	FALSE	Promoter (<=1kb)	chr15	73512560	73572242	59683	+	105841	uc007wce.1	176	ENSMUSG00000036661	Dennd3	DENN/MADD domain containing 3
499	chr15	75909628	75909634	7	*	2.65223e-11	0.384523	0.00142073	0.383214	3.09929e-10	0.00181876	0.345339	-0.34352	FALSE	Promoter (<=1kb)	chr15	75894796	75909556	14761	-	66656	uc033gum.1	-72	ENSMUSG00000055762	Eef1d	eukaryotic translation elongation factor 1 delta (guanine nucleotide exchange protein)
500	chr15	75909644	75909667	24	*	2.65223e-11	0.384523	0.00142073	0.383214	9.81697e-09	0.34464	0.00324075	0.3414	TRUE	Promoter (<=1kb)	chr15	75894796	75909556	14761	-	66656	uc033gum.1	-88	ENSMUSG00000055762	Eef1d	eukaryotic translation elongation factor 1 delta (guanine nucleotide exchange protein)
501	chr15	75909879	75909880	2	*	8.58092e-06	0.00177445	3.60832e-05	0.00173836	0.00299886	0.00531414	0.101171	-0.0958573	FALSE	Promoter (<=1kb)	chr15	75909735	75914535	4801	+	105734	uc007whp.1	145	ENSMUSG00000103906	Tigd5	tigger transposable element derived 5
502	chr15	75909883	75909977	95	*	8.58092e-06	0.00177445	3.60832e-05	0.00173836	0.00121392	0.138357	0.00244451	0.135913	TRUE	Promoter (<=1kb)	chr15	75909735	75914535	4801	+	105734	uc007whp.1	242	ENSMUSG00000103906	Tigd5	tigger transposable element derived 5
503	chr15	75941095	75941158	64	*	1.74272e-09	0.382443	0.00335328	0.379088	6.84145e-07	0.00477316	4.10251e-05	0.00473214	TRUE	Promoter (<=1kb)	chr15	75940952	75949400	8449	+	78834	uc007whu.1	206	ENSMUSG00000050846	Zfp623	zinc finger protein 623
504	chr15	76080964	76081008	45	*	8.8725e-09	0.00287254	3.55058e-05	0.00283704	0.000137668	2.4442e-05	0.000382249	-0.000357807	FALSE	Promoter (<=1kb)	chr15	76070182	76080946	10765	-	67959	uc007wij.2	-18	ENSMUSG00000002524	Puf60	poly-U binding splicing factor 60
505	chr15	76657067	76657141	75	*	2.63575e-05	0.315133	0.00811778	0.307016	1.12313e-08	0.0166644	0.000112435	0.016552	TRUE	Promoter (<=1kb)	chr15	76646927	76656901	9975	-	54151	uc007wlh.2	-166	ENSMUSG00000053929	Cyhr1	cysteine and histidine rich 1
506	chr15	78899711	78899781	71	*	1.08009e-07	3.24931e-05	0.00370071	-0.00366822	2.23383e-08	0.345212	0.00317763	0.342061	FALSE	Promoter (<=1kb)	chr15	78899786	78912052	12267	+	20401	uc007wro.1	-75	ENSMUSG00000022436	Sh3bp1	SH3-domain binding protein 1
507	chr15	78935245	78935328	84	*	1.57222e-11	0.384639	0.000999025	0.38364	3.2154e-08	0.00482499	3.57925e-05	0.00478976	TRUE	Promoter (<=1kb)	chr15	78934933	78941910	6978	+	97961	uc007wrw.1	395	ENSMUSG00000033099	Nol12	nucleolar protein 12
508	chr15	78982862	78983019	158	*	8.82185e-12	0.383202	0.000930647	0.382199	7.05317e-05	0.00788983	0.269208	-0.259613	FALSE	Promoter (<=1kb)	chr15	78983056	79005869	22814	+	110253	uc007wsa.1	-194	ENSMUSG00000033088	Triobp	TRIO and F-actin binding protein
509	chr15	79108893	79109094	202	*	1.74495e-05	0.000176532	0.0100072	-0.00983065	1.50607e-05	2.33945e-05	0.000845548	-0.000822323	TRUE	Promoter (<=1kb)	chr15	79108983	79116284	7302	+	27008	uc007wsm.2	0	ENSMUSG00000033039	Micall1	microtubule associated monooxygenase, calponin and LIM domain containing -like 1
510	chr15	79108893	79109094	202	*	8.5878e-07	0.357395	0.00652351	0.350872	1.50607e-05	2.33945e-05	0.000845548	-0.000822323	FALSE	Promoter (<=1kb)	chr15	79108983	79116284	7302	+	27008	uc007wsm.2	0	ENSMUSG00000033039	Micall1	microtubule associated monooxygenase, calponin and LIM domain containing -like 1
511	chr15	79108893	79109094	202	*	7.60826e-07	7.17084e-05	0.00532606	-0.00525435	1.50607e-05	2.33945e-05	0.000845548	-0.000822323	TRUE	Promoter (<=1kb)	chr15	79108983	79116284	7302	+	27008	uc007wsm.2	0	ENSMUSG00000033039	Micall1	microtubule associated monooxygenase, calponin and LIM domain containing -like 1
512	chr15	79108893	79109094	202	*	1.34886e-08	0.373192	0.00368423	0.369508	1.50607e-05	2.33945e-05	0.000845548	-0.000822323	FALSE	Promoter (<=1kb)	chr15	79108983	79116284	7302	+	27008	uc007wsm.2	0	ENSMUSG00000033039	Micall1	microtubule associated monooxygenase, calponin and LIM domain containing -like 1
513	chr15	79108893	79109094	202	*	6.99313e-07	5.881e-05	0.00374519	-0.00368638	1.50607e-05	2.33945e-05	0.000845548	-0.000822323	TRUE	Promoter (<=1kb)	chr15	79108983	79116284	7302	+	27008	uc007wsm.2	0	ENSMUSG00000033039	Micall1	microtubule associated monooxygenase, calponin and LIM domain containing -like 1
514	chr15	79108893	79109094	202	*	1.18798e-09	0.37603	0.00220081	0.373829	1.50607e-05	2.33945e-05	0.000845548	-0.000822323	FALSE	Promoter (<=1kb)	chr15	79108983	79116284	7302	+	27008	uc007wsm.2	0	ENSMUSG00000033039	Micall1	microtubule associated monooxygenase, calponin and LIM domain containing -like 1
515	chr15	79455586	79455632	47	*	4.00594e-05	0.000728377	3.31367e-05	0.000695417	5.03786e-05	0.0262045	0.00104657	0.0251579	TRUE	Distal Intergenic	chr15	79417852	79442057	24206	-	27373	uc007wtl.2	-13529	ENSMUSG00000022433	Csnk1e	casein kinase 1, epsilon
516	chr15	79671063	79671156	94	*	1.02064e-10	4.29362e-05	0.0063007	-0.00625401	1.23909e-10	0.343784	0.00152853	0.342256	FALSE	Promoter (<=1kb)	chr15	79670868	79672862	1995	+	223696	uc007wud.1	288	ENSMUSG00000022427	Tomm22	translocase of outer mitochondrial membrane 22 homolog (yeast)
517	chr15	80256010	80256075	66	*	3.55604e-06	0.000109485	0.0128065	-0.012697	0.00118567	0.00516683	0.00022473	0.0049421	FALSE	Promoter (<=1kb)	chr15	80255184	80257545	2362	+	11911	uc007wvl.2	891	ENSMUSG00000042406	Atf4	activating transcription factor 4
518	chr15	80711622	80711638	17	*	1.76349e-11	0.383416	0.00103503	0.382381	0.0015379	0.0226881	0.000830222	0.0218492	TRUE	Promoter (<=1kb)	chr15	80711313	80941086	229774	+	213988	uc007wvt.1	325	ENSMUSG00000047888	Tnrc6b	trinucleotide repeat containing 6b
519	chr15	80711748	80711826	79	*	0.00125252	0.00400942	0.000161413	0.003848	2.66327e-11	0.000743939	0.344443	-0.343617	FALSE	Promoter (<=1kb)	chr15	80711313	80941086	229774	+	213988	uc007wvt.1	513	ENSMUSG00000047888	Tnrc6b	trinucleotide repeat containing 6b
520	chr15	81811599	81811617	19	*	4.68047e-05	0.0018523	4.00316e-05	0.00181226	0.000194046	0.271948	0.00994933	0.261999	TRUE	Promoter (<=1kb)	chr15	81811414	81826863	15450	+	21685	uc007wxk.2	203	ENSMUSG00000022389	Tef	thyrotroph embryonic factor
521	chr15	83350049	83350075	27	*	4.2813e-12	0.384936	0.000815402	0.384116	1.24771e-07	0.336421	0.00398531	0.332447	TRUE	Promoter (<=1kb)	chr15	83299740	83350247	50508	-	66251	uc007xag.1	172	ENSMUSG00000054277	Arfgap3	ADP-ribosylation factor GTPase activating protein 3
522	chr15	85670651	85670660	10	*	5.41302e-06	0.00150748	3.2066e-05	0.00147541	3.28996e-07	0.345251	0.00646803	0.338783	TRUE	Distal Intergenic	chr15	85703773	85707524	3752	+	102800312	uc056yzv.1	-33122	#N/A	Lincppara	long intergenic noncoding RNA near Ppara
523	chr15	88863331	88863361	31	*	5.45495e-05	0.000905412	3.59939e-05	0.000869418	8.73914e-05	0.00857664	0.258804	-0.250227	FALSE	Promoter (1-2kb)	chr15	88862194	88865726	3533	+	223775	uc007xeq.1	1167	ENSMUSG00000035828	Pim3	proviral integration site 3
524	chr15	89075897	89075941	45	*	2.34829e-06	3.22917e-05	0.0009773	-0.000945008	3.56189e-08	0.311343	0.00240258	0.308941	FALSE	Promoter (<=1kb)	chr15	89071198	89075854	4657	-	69120	uc007xfb.1	-43	ENSMUSG00000087331	1810021B22Rik	RIKEN cDNA 1810021B22 gene
525	chr15	89499624	89499727	104	*	3.13788e-05	0.362724	0.0140394	0.342989	6.26155e-11	0.000972389	0.342766	-0.341753	FALSE	Promoter (<=1kb)	chr15	89499857	89560260	60404	+	58234	uc007xha.2	-233	ENSMUSG00000022623	Shank3	SH3/ankyrin domain gene 3
526	chr15	89499918	89499977	60	*	2.75725e-05	4.47557e-05	0.00204888	-0.00200816	9.5475e-07	0.00733903	0.336211	-0.328872	TRUE	Promoter (<=1kb)	chr15	89499857	89560260	60404	+	58234	uc007xha.2	120	ENSMUSG00000022623	Shank3	SH3/ankyrin domain gene 3
527	chr15	91673103	91673184	82	*	1.93772e-07	3.35144e-05	0.00249742	-0.00246391	5.69103e-08	0.00361139	0.328506	-0.324895	TRUE	Promoter (<=1kb)	chr15	91673224	91816124	142901	+	66725	uc007xhz.1	-121	ENSMUSG00000036273	Lrrk2	leucine-rich repeat kinase 2
528	chr15	93519406	93519432	27	*	1.64148e-07	4.39692e-05	0.00674674	-0.00670277	4.30784e-11	0.00060507	0.302077	-0.301472	TRUE	Promoter (<=1kb)	chr15	93499114	93519436	20323	-	106042	uc007xja.1	4	ENSMUSG00000036158	Prickle1	prickle homolog 1 (Drosophila)
529	chr15	96285193	96285512	320	*	1.06179e-06	3.12289e-05	0.00129587	-0.00126464	7.38667e-10	0.340761	0.00135636	0.339223	FALSE	Promoter (1-2kb)	chr15	96134819	96283608	148790	-	70040	uc007xjz.1	-1585	#N/A	2610037D02Rik	RIKEN cDNA 2610037D02 gene
530	chr15	96285193	96285512	320	*	8.315e-08	0.00410356	3.69628e-05	0.00405899	7.38667e-10	0.340761	0.00135636	0.339223	TRUE	Promoter (1-2kb)	chr15	96134819	96283608	148790	-	70040	uc007xjz.1	-1585	#N/A	2610037D02Rik	RIKEN cDNA 2610037D02 gene
531	chr15	96285567	96285567	1	*	0.000113242	3.77565e-05	0.00146571	-0.00143348	0.000375283	7.69321e-05	0.00197067	-0.00189374	TRUE	Promoter (1-2kb)	chr15	96287522	96405463	117942	+	77044	uc007xkd.2	-1955	ENSMUSG00000033237	Arid2	AT rich interactive domain 2 (ARID, RFX-like)
532	chr15	96285568	96285568	1	*	0.000113242	3.77565e-05	0.00146571	-0.00143348	4.37413e-08	0.295711	0.00195933	0.293752	FALSE	Promoter (1-2kb)	chr15	96287522	96405463	117942	+	77044	uc007xkd.2	-1954	ENSMUSG00000033237	Arid2	AT rich interactive domain 2 (ARID, RFX-like)
533	chr15	96285570	96285570	1	*	0.000113242	3.77565e-05	0.00146571	-0.00143348	0.000302588	6.98289e-05	0.00183775	-0.00176792	TRUE	Promoter (1-2kb)	chr15	96287522	96405463	117942	+	77044	uc007xkd.2	-1952	ENSMUSG00000033237	Arid2	AT rich interactive domain 2 (ARID, RFX-like)
534	chr15	96285576	96285582	7	*	0.000113242	3.77565e-05	0.00146571	-0.00143348	3.60803e-09	0.313736	0.0014162	0.31232	FALSE	Promoter (1-2kb)	chr15	96287522	96405463	117942	+	77044	uc007xkd.2	-1946	ENSMUSG00000033237	Arid2	AT rich interactive domain 2 (ARID, RFX-like)
535	chr15	96285583	96285610	28	*	0.000113242	3.77565e-05	0.00146571	-0.00143348	0.000131183	3.60075e-05	0.00089916	-0.000863153	TRUE	Promoter (1-2kb)	chr15	96287522	96405463	117942	+	77044	uc007xkd.2	-1939	ENSMUSG00000033237	Arid2	AT rich interactive domain 2 (ARID, RFX-like)
536	chr15	96285621	96285621	1	*	0.000113242	3.77565e-05	0.00146571	-0.00143348	1.3311e-12	0.340766	0.000510674	0.340255	FALSE	Promoter (1-2kb)	chr15	96287522	96405463	117942	+	77044	uc007xkd.2	-1901	ENSMUSG00000033237	Arid2	AT rich interactive domain 2 (ARID, RFX-like)
537	chr15	96285630	96285630	1	*	0.000113242	3.77565e-05	0.00146571	-0.00143348	0.000207468	2.55244e-05	0.000380502	-0.000354978	TRUE	Promoter (1-2kb)	chr15	96287522	96405463	117942	+	77044	uc007xkd.2	-1892	ENSMUSG00000033237	Arid2	AT rich interactive domain 2 (ARID, RFX-like)
538	chr15	96285638	96285647	10	*	0.000113242	3.77565e-05	0.00146571	-0.00143348	3.95627e-17	0.346834	0.000131272	0.346702	FALSE	Promoter (1-2kb)	chr15	96287522	96405463	117942	+	77044	uc007xkd.2	-1884	ENSMUSG00000033237	Arid2	AT rich interactive domain 2 (ARID, RFX-like)
539	chr15	96288172	96288268	97	*	8.14873e-12	0.384641	0.000797558	0.383843	5.87315e-07	0.0015363	2.32486e-05	0.00151305	TRUE	Promoter (<=1kb)	chr15	96287522	96405463	117942	+	77044	uc007xkd.2	746	ENSMUSG00000033237	Arid2	AT rich interactive domain 2 (ARID, RFX-like)
540	chr15	96460936	96461011	76	*	4.26995e-07	0.00740446	7.90507e-05	0.00732541	9.29027e-13	0.000559049	0.346073	-0.345615	FALSE	Promoter (<=1kb)	chr15	96411698	96460843	49146	-	72193	uc007xkf.1	-93	ENSMUSG00000033228	Scaf11	SR-related CTD-associated factor 11
541	chr15	98871625	98871766	142	*	1.5426e-08	0.00618609	4.52498e-05	0.00613885	1.66293e-10	0.343966	0.0013586	0.342263	TRUE	Promoter (<=1kb)	chr15	98831669	98871205	39537	-	381022	uc029suy.1	-420	ENSMUSG00000048154	Kmt2d	lysine (K)-specific methyltransferase 2D
542	chr15	98871976	98871977	2	*	1.85908e-07	3.41741e-05	0.00295531	-0.00292114	1.46631e-14	0.000299812	0.343245	-0.342945	TRUE	Promoter (<=1kb)	chr15	98831669	98871205	39537	-	381022	uc029suy.1	-771	ENSMUSG00000048154	Kmt2d	lysine (K)-specific methyltransferase 2D
543	chr15	98918179	98918212	34	*	2.98114e-07	0.0026594	3.52893e-05	0.00262411	1.83521e-09	0.00431048	3.37568e-05	0.00427673	TRUE	Promoter (<=1kb)	chr15	98903921	98918098	14178	-	74775	uc007xoi.1	-81	ENSMUSG00000022999	Lmbr1l	limb region 1 like
544	chr15	98934595	98934618	24	*	5.98952e-06	0.00126192	3.06849e-05	0.00123124	4.33549e-13	0.343824	0.000525694	0.343298	TRUE	Promoter (<=1kb)	chr15	98931431	98934390	2960	-	22143	uc007xoj.1	-205	ENSMUSG00000023004	Tuba1b	tubulin, alpha 1B
545	chr15	99294958	99295076	119	*	1.92334e-05	0.00156469	3.998e-05	0.00152466	3.10819e-12	0.000787715	0.3448	-0.344012	FALSE	Promoter (<=1kb)	chr15	99295239	99317007	21769	+	54614	uc007xpg.1	-281	ENSMUSG00000023007	Prpf40b	PRP40 pre-mRNA processing factor 40 homolog B (yeast)
546	chr15	99702530	99702552	23	*	2.97248e-05	3.10452e-05	0.00132871	-0.00129765	1.60438e-07	0.00328911	0.314711	-0.311422	TRUE	Promoter (<=1kb)	chr15	99702287	99713995	11709	+	83797	uc007xqb.1	265	ENSMUSG00000023018	Smarcd1	SWI/SNF related, matrix associated, actin dependent regulator of chromatin, subfamily d, member 1
547	chr15	99702530	99702552	23	*	2.37213e-11	0.384858	0.00105312	0.383805	1.60438e-07	0.00328911	0.314711	-0.311422	FALSE	Promoter (<=1kb)	chr15	99702287	99713995	11709	+	83797	uc007xqb.1	265	ENSMUSG00000023018	Smarcd1	SWI/SNF related, matrix associated, actin dependent regulator of chromatin, subfamily d, member 1
548	chr15	99972995	99973095	101	*	7.84293e-05	0.157607	0.00151607	0.156091	1.4722e-05	2.379e-05	0.000427484	-0.000404204	FALSE	Promoter (<=1kb)	chr15	99972167	99973287	1121	-	70281	uc011zzi.1	192	ENSMUSG00000100084	2310068J16Rik	RIKEN cDNA 2310068J16 gene
549	chr15	99972995	99973095	101	*	0.000313963	3.09869e-05	0.000573455	-0.000542461	1.4722e-05	2.379e-05	0.000427484	-0.000404204	TRUE	Promoter (<=1kb)	chr15	99972167	99973287	1121	-	70281	uc011zzi.1	192	ENSMUSG00000100084	2310068J16Rik	RIKEN cDNA 2310068J16 gene
550	chr15	102518296	102518372	77	*	3.50604e-09	8.09257e-05	0.00784697	-0.00777996	3.87633e-11	0.0009523	0.335233	-0.334281	TRUE	Promoter (<=1kb)	chr15	102518192	102523674	5483	+	21357	uc056zai.1	180	ENSMUSG00000023051	Tarbp2	TAR (HIV) RNA binding protein 2
551	chr15	103323260	103323344	85	*	3.96903e-07	0.21731	0.00185289	0.21538	0.000155715	0.0104806	0.285961	-0.275206	FALSE	Intron (uc007xxz.1/29813, intron 6 of 7)	chr15	103313895	103334327	20433	-	29813	uc007xxz.1	10983	ENSMUSG00000000552	Zfp385a	zinc finger protein 385A
552	chr15	103323396	103323426	31	*	3.96903e-07	0.21731	0.00185289	0.21538	3.88025e-10	0.0194185	8.17816e-05	0.0193367	TRUE	Intron (uc007xxz.1/29813, intron 6 of 7)	chr15	103313895	103334327	20433	-	29813	uc007xxz.1	10901	ENSMUSG00000000552	Zfp385a	zinc finger protein 385A
553	chr15	103323617	103323617	1	*	6.09381e-05	0.000127969	0.012003	-0.0118769	0.000303629	0.00676349	0.218467	-0.211704	TRUE	Intron (uc007xxz.1/29813, intron 6 of 7)	chr15	103313895	103334327	20433	-	29813	uc007xxz.1	10710	ENSMUSG00000000552	Zfp385a	zinc finger protein 385A
554	chr16	4559520	4559625	106	*	8.95059e-06	0.00836446	0.00010903	0.00824399	3.06182e-06	0.331613	0.00649506	0.32429	TRUE	Promoter (<=1kb)	chr16	4544661	4559720	15060	-	83383	uc007xzv.1	95	ENSMUSG00000005718	Tfap4	transcription factor AP4
555	chr16	5203342	5203381	40	*	0.00776924	0.0150728	0.202121	-0.187048	0.000436588	0.000262396	0.00674658	-0.00648418	TRUE	Promoter (<=1kb)	chr16	5195280	5204012	8733	-	27426	uc007ybv.2	631	ENSMUSG00000023143	Nagpa	N-acetylglucosamine-1-phosphodiester alpha-N-acetylglucosaminidase
556	chr16	5203634	5203757	124	*	1.39333e-05	0.0025259	6.16706e-05	0.00247298	5.83268e-06	2.35785e-05	0.000873244	-0.000849655	FALSE	Promoter (<=1kb)	chr16	5195280	5204012	8733	-	27426	uc007ybv.2	255	ENSMUSG00000023143	Nagpa	N-acetylglucosamine-1-phosphodiester alpha-N-acetylglucosaminidase
557	chr16	5233747	5233747	1	*	1.63025e-11	0.435059	0.000719343	0.434339	0.00109718	0.00609964	0.0002131	0.00588654	TRUE	Promoter (<=1kb)	chr16	5233621	5244907	11287	+	208211	uc007yby.2	126	ENSMUSG00000039427	Alg1	asparagine-linked glycosylation 1 (beta-1,4-mannosyltransferase)
558	chr16	8829312	8829371	60	*	4.25295e-06	0.00242222	4.78042e-05	0.00237441	5.21374e-08	0.00340976	3.14904e-05	0.00337827	TRUE	Promoter (<=1kb)	chr16	8830100	8858924	28825	+	69053	uc007yda.2	-788	ENSMUSG00000022507	1810013L24Rik	RIKEN cDNA 1810013L24 gene
559	chr16	13447834	13447840	7	*	9.07182e-08	0.369561	0.00347248	0.366089	4.86056e-06	0.00119321	2.56607e-05	0.00116754	TRUE	Promoter (1-2kb)	chr16	13449523	13449601	79	+	100124432	uc012abh.1	-1689	ENSMUSG00000076972	Mir193b	microRNA 193b
560	chr16	18288935	18289005	71	*	3.13724e-13	0.385012	0.000591251	0.384421	3.97901e-06	0.00229616	4.34033e-05	0.00225276	TRUE	Promoter (<=1kb)	chr16	18253965	18289168	35204	-	94223	uc007ynf.1	163	ENSMUSG00000022718	Dgcr8	DiGeorge syndrome critical region gene 8
561	chr16	18288935	18289005	71	*	8.5977e-05	3.16255e-05	0.000846234	-0.000814609	3.97901e-06	0.00229616	4.34033e-05	0.00225276	FALSE	Promoter (<=1kb)	chr16	18253965	18289168	35204	-	94223	uc007ynf.1	163	ENSMUSG00000022718	Dgcr8	DiGeorge syndrome critical region gene 8
562	chr16	18288935	18289005	71	*	9.36506e-12	0.383644	0.000929392	0.382715	3.97901e-06	0.00229616	4.34033e-05	0.00225276	TRUE	Promoter (<=1kb)	chr16	18253965	18289168	35204	-	94223	uc007ynf.1	163	ENSMUSG00000022718	Dgcr8	DiGeorge syndrome critical region gene 8
563	chr16	20302134	20302199	66	*	3.11889e-07	0.00355533	3.86449e-05	0.00351668	4.2714e-09	0.333127	0.00179222	0.331335	TRUE	Promoter (<=1kb)	chr16	20279821	20302362	22542	-	381038	uc007ypm.1	163	ENSMUSG00000033918	Parl	presenilin associated, rhomboid-like
564	chr16	20716209	20716285	77	*	7.51611e-11	0.382512	0.00110481	0.381174	1.45556e-08	0.00916955	5.18654e-05	0.00911768	TRUE	Promoter (<=1kb)	chr16	20702966	20716977	14012	-	12724	uc012ada.1	692	ENSMUSG00000022843	Clcn2	chloride channel 2
565	chr16	20716294	20716305	12	*	7.51611e-11	0.382512	0.00110481	0.381174	1.10065e-05	0.00859839	0.321659	-0.313049	FALSE	Promoter (<=1kb)	chr16	20702966	20716977	14012	-	12724	uc012ada.1	672	ENSMUSG00000022843	Clcn2	chloride channel 2
566	chr16	20716306	20716327	22	*	7.51611e-11	0.382512	0.00110481	0.381174	1.3076e-09	0.00764726	3.92203e-05	0.00760803	TRUE	Promoter (<=1kb)	chr16	20702966	20716977	14012	-	12724	uc012ada.1	650	ENSMUSG00000022843	Clcn2	chloride channel 2
567	chr16	20716335	20716368	34	*	7.51611e-11	0.382512	0.00110481	0.381174	9.7185e-07	0.00515626	0.333615	-0.328459	FALSE	Promoter (<=1kb)	chr16	20702966	20716977	14012	-	12724	uc012ada.1	609	ENSMUSG00000022843	Clcn2	chloride channel 2
568	chr16	20716372	20716378	7	*	7.51611e-11	0.382512	0.00110481	0.381174	2.11204e-08	0.00292213	2.79857e-05	0.00289415	TRUE	Promoter (<=1kb)	chr16	20702966	20716977	14012	-	12724	uc012ada.1	599	ENSMUSG00000022843	Clcn2	chloride channel 2
569	chr16	20716392	20716403	12	*	7.51611e-11	0.382512	0.00110481	0.381174	4.87418e-10	0.00160287	0.344942	-0.343339	FALSE	Promoter (<=1kb)	chr16	20702966	20716977	14012	-	12724	uc012ada.1	574	ENSMUSG00000022843	Clcn2	chloride channel 2
570	chr16	20716413	20716415	3	*	7.51611e-11	0.382512	0.00110481	0.381174	2.06971e-06	0.000914984	2.36248e-05	0.000891359	TRUE	Promoter (<=1kb)	chr16	20702966	20716977	14012	-	12724	uc012ada.1	562	ENSMUSG00000022843	Clcn2	chloride channel 2
571	chr16	22439262	22439264	3	*	0.00141624	0.00309265	0.153534	-0.150442	0.00275743	0.00769168	0.171908	-0.164216	TRUE	Promoter (<=1kb)	chr16	22381313	22439570	58258	-	104156	uc007yse.1	306	ENSMUSG00000013089	Etv5	ets variant 5
572	chr16	22439276	22439428	153	*	8.57766e-05	0.00149566	4.86755e-05	0.00144698	6.06717e-09	0.0075848	3.80306e-05	0.00752277	TRUE	Promoter (<=1kb)	chr16	22381313	22439570	58258	-	104156	uc007yse.1	142	ENSMUSG00000013089	Etv5	ets variant 5
573	chr16	22439591	22439591	1	*	0.00031718	0.00033678	3.03473e-05	0.000306433	0.00503319	0.00305913	0.0711526	-0.0680935	FALSE	Promoter (<=1kb)	chr16	22381313	22439570	58258	-	104156	uc007yse.1	-21	ENSMUSG00000013089	Etv5	ets variant 5
574	chr16	30388353	30388353	1	*	0.000449067	0.00193791	7.61263e-05	0.00186178	5.57033e-06	0.000895875	2.32503e-05	0.000872625	TRUE	Promoter (<=1kb)	chr16	30312424	30388530	76107	-	224088	uc012aee.1	177	ENSMUSG00000022533	Atp13a3	ATPase type 13A3
575	chr16	30388355	30388355	1	*	0.000449067	0.00193791	7.61263e-05	0.00186178	3.03138e-11	0.000912403	0.346822	-0.345909	FALSE	Promoter (<=1kb)	chr16	30312424	30388530	76107	-	224088	uc012aee.1	175	ENSMUSG00000022533	Atp13a3	ATPase type 13A3
576	chr16	30388358	30388366	9	*	0.000449067	0.00193791	7.61263e-05	0.00186178	4.98505e-06	0.000974629	2.34253e-05	0.000951204	TRUE	Promoter (<=1kb)	chr16	30312424	30388530	76107	-	224088	uc012aee.1	164	ENSMUSG00000022533	Atp13a3	ATPase type 13A3
577	chr16	30388375	30388375	1	*	0.000449067	0.00193791	7.61263e-05	0.00186178	1.82114e-10	0.00117076	0.345966	-0.344796	FALSE	Promoter (<=1kb)	chr16	30312424	30388530	76107	-	224088	uc012aee.1	155	ENSMUSG00000022533	Atp13a3	ATPase type 13A3
578	chr16	30388377	30388442	66	*	0.000449067	0.00193791	7.61263e-05	0.00186178	5.78493e-06	0.00114742	2.45995e-05	0.0011227	TRUE	Promoter (<=1kb)	chr16	30312424	30388530	76107	-	224088	uc012aee.1	88	ENSMUSG00000022533	Atp13a3	ATPase type 13A3
579	chr16	32277447	32277517	71	*	0.000307063	3.25488e-05	0.000761029	-0.000729334	3.77898e-09	0.00292707	0.338074	-0.335184	TRUE	Promoter (<=1kb)	chr16	32277461	32301439	23979	+	70238	uc007yyo.2	0	ENSMUSG00000014074	Rnf168	ring finger protein 168
580	chr16	32277682	32277687	6	*	0.000310244	0.2053	0.005109	0.200191	3.69873e-10	0.345528	0.00156622	0.344058	TRUE	Promoter (<=1kb)	chr16	32277461	32301439	23979	+	70238	uc007yyo.2	226	ENSMUSG00000014074	Rnf168	ring finger protein 168
581	chr16	32914150	32914180	31	*	0.00846961	0.000258481	0.0049215	-0.00466302	1.85308e-08	0.344785	0.00287853	0.34204	FALSE	Promoter (<=1kb)	chr16	32914100	32989046	74947	+	70144	uc007yzr.1	80	ENSMUSG00000022801	Lrch3	leucine-rich repeats and calponin homology (CH) domain containing 3
582	chr16	33829744	33829790	47	*	1.18951e-06	0.372396	0.00919606	0.3632	4.02856e-07	0.000102898	0.0117342	-0.0116572	FALSE	Promoter (<=1kb)	chr16	33829665	33949338	119674	+	16419	uc007zan.2	125	ENSMUSG00000022817	Itgb5	integrin beta 5
583	chr16	35871034	35871083	50	*	2.37982e-05	9.04219e-05	0.00422898	-0.00413769	1.57044e-08	0.0020679	0.328926	-0.32683	TRUE	Promoter (<=1kb)	chr16	35832878	35871382	38505	-	547253	uc007zbs.2	299	ENSMUSG00000034422	Parp14	poly (ADP-ribose) polymerase family, member 14
584	chr16	36875188	36875321	134	*	1.06106e-15	0.385158	0.000288533	0.384868	1.95747e-10	0.00158481	0.333838	-0.332254	FALSE	Promoter (<=1kb)	chr16	36875202	36887706	12505	+	224139	uc007zdd.1	0	ENSMUSG00000034243	Golgb1	golgi autoantigen, golgin subfamily b, macrogolgin 1
585	chr16	36875188	36875321	134	*	0.000190074	6.09269e-05	0.00224872	-0.00218779	1.95747e-10	0.00158481	0.333838	-0.332254	TRUE	Promoter (<=1kb)	chr16	36875202	36887706	12505	+	224139	uc007zdd.1	0	ENSMUSG00000034243	Golgb1	golgi autoantigen, golgin subfamily b, macrogolgin 1
586	chr16	37868414	37868513	100	*	1.19153e-05	3.39267e-05	0.00202822	-0.00199266	6.9925e-05	0.0210304	0.000214206	0.0208486	FALSE	Promoter (<=1kb)	chr16	37868400	37888857	20458	+	320184	uc007zek.1	113	ENSMUSG00000034158	Lrrc58	leucine rich repeat containing 58
587	chr16	38089915	38089941	27	*	3.98025e-09	0.00236672	3.10703e-05	0.00233565	4.83699e-07	2.45131e-05	0.00100935	-0.000984833	FALSE	Promoter (<=1kb)	chr16	38085064	38089260	4197	-	414072	uc007zem.2	-655	#N/A	BC031361	cDNA sequence BC031361
588	chr16	38089947	38089957	11	*	3.98025e-09	0.00236672	3.10703e-05	0.00233565	3.24285e-10	0.343412	0.00144494	0.341967	TRUE	Promoter (<=1kb)	chr16	38085064	38089260	4197	-	414072	uc007zem.2	-687	#N/A	BC031361	cDNA sequence BC031361
589	chr16	58408231	58408231	1	*	7.13313e-05	2.98888e-05	0.00081571	-0.000785825	2.05351e-06	0.00712843	0.315898	-0.308769	TRUE	Promoter (<=1kb)	chr16	58408535	58469745	61211	+	73379	uc007zno.1	-304	ENSMUSG00000035107	Dcbld2	discoidin, CUB and LCCL domain containing 2
590	chr16	58408236	58408236	1	*	7.13313e-05	2.98888e-05	0.00081571	-0.000785825	1.00055e-06	0.00989834	0.000159981	0.00973836	FALSE	Promoter (<=1kb)	chr16	58408535	58469745	61211	+	73379	uc007zno.1	-299	ENSMUSG00000035107	Dcbld2	discoidin, CUB and LCCL domain containing 2
591	chr16	58408243	58408271	29	*	7.13313e-05	2.98888e-05	0.00081571	-0.000785825	1.75095e-05	0.00932825	0.296289	-0.286961	TRUE	Promoter (<=1kb)	chr16	58408535	58469745	61211	+	73379	uc007zno.1	-292	ENSMUSG00000035107	Dcbld2	discoidin, CUB and LCCL domain containing 2
592	chr16	58408276	58408276	1	*	7.13313e-05	2.98888e-05	0.00081571	-0.000785825	3.63741e-08	0.0104672	0.000106674	0.0103606	FALSE	Promoter (<=1kb)	chr16	58408535	58469745	61211	+	73379	uc007zno.1	-259	ENSMUSG00000035107	Dcbld2	discoidin, CUB and LCCL domain containing 2
593	chr16	58408285	58408285	1	*	7.13313e-05	2.98888e-05	0.00081571	-0.000785825	3.55725e-05	0.00980847	0.2831	-0.273291	TRUE	Promoter (<=1kb)	chr16	58408535	58469745	61211	+	73379	uc007zno.1	-250	ENSMUSG00000035107	Dcbld2	discoidin, CUB and LCCL domain containing 2
594	chr16	58408294	58408294	1	*	7.13313e-05	2.98888e-05	0.00081571	-0.000785825	2.05787e-08	0.00923799	9.35713e-05	0.00914442	FALSE	Promoter (<=1kb)	chr16	58408535	58469745	61211	+	73379	uc007zno.1	-241	ENSMUSG00000035107	Dcbld2	discoidin, CUB and LCCL domain containing 2
595	chr16	58408313	58408313	1	*	7.13313e-05	2.98888e-05	0.00081571	-0.000785825	1.52815e-05	0.00848339	0.287606	-0.279123	TRUE	Promoter (<=1kb)	chr16	58408535	58469745	61211	+	73379	uc007zno.1	-222	ENSMUSG00000035107	Dcbld2	discoidin, CUB and LCCL domain containing 2
596	chr16	58670343	58670456	114	*	3.18886e-07	9.20533e-05	0.0166128	-0.0165368	5.76106e-07	6.6223e-05	0.00537659	-0.00531037	TRUE	Promoter (<=1kb)	chr16	58670208	58677215	7008	+	12892	uc007znz.2	248	ENSMUSG00000022742	Cpox	coproporphyrinogen oxidase
597	chr16	78576750	78576911	162	*	5.31638e-07	3.43271e-05	0.0018909	-0.00185657	5.10308e-11	0.000726943	0.339045	-0.338107	TRUE	Promoter (<=1kb)	chr16	78540336	78576688	36353	-	67102	uc007zsr.3	-62	ENSMUSG00000022864	D16Ertd472e	DNA segment, Chr 16, ERATO Doi 472, expressed
598	chr16	87440454	87440721	268	*	5.72892e-12	0.382917	0.000874138	0.382068	3.18132e-05	0.00163979	0.256014	-0.245931	FALSE	Promoter (<=1kb)	chr16	87433331	87440592	7262	-	53858	uc007zui.1	0	ENSMUSG00000041079	Rwdd2b	RWD domain containing 2B
599	chr16	87440454	87440721	268	*	9.43032e-06	0.00122255	3.22256e-05	0.00119032	3.18132e-05	0.00163979	0.256014	-0.245931	FALSE	Promoter (<=1kb)	chr16	87433331	87440592	7262	-	53858	uc007zui.1	0	ENSMUSG00000041079	Rwdd2b	RWD domain containing 2B
600	chr16	90810240	90810248	9	*	1.03572e-09	0.00462511	4.91602e-05	0.00457595	1.3476e-06	0.299653	0.0044279	0.295225	TRUE	Promoter (<=1kb)	chr16	90751527	90810413	58887	-	207932	uc007zwm.2	165	ENSMUSG00000039929	Urb1	URB1 ribosome biogenesis 1 homolog (S. cerevisiae)
601	chr16	96192286	96192326	41	*	0.000221203	0.00965716	0.000220339	0.00943682	7.11347e-05	0.0170816	0.000276489	0.0168051	TRUE	Promoter (<=1kb)	chr16	96158406	96192257	33852	-	385668	uc008acr.1	-29	ENSMUSG00000045275	Lca5l	Leber congenital amaurosis 5-like
602	chr17	3115205	3115276	72	*	8.73998e-05	0.000161726	0.00842745	-0.00826572	2.65711e-06	6.52238e-05	0.00963537	-0.00956899	TRUE	Promoter (<=1kb)	chr17	3114972	3190280	75309	+	106583	uc008aei.2	304	ENSMUSG00000046201	Scaf8	SR-related CTD-associated factor 8
603	chr17	3115341	3115435	95	*	1.12524e-06	4.82639e-05	0.00387836	-0.0038301	1.34661e-06	0.294026	0.00408429	0.289941	FALSE	Promoter (<=1kb)	chr17	3114972	3190280	75309	+	106583	uc008aei.2	463	ENSMUSG00000046201	Scaf8	SR-related CTD-associated factor 8
604	chr17	4995037	4995050	14	*	2.09957e-07	0.00378228	3.84421e-05	0.00374383	1.04286e-15	0.000220151	0.347538	-0.347318	FALSE	Promoter (<=1kb)	chr17	4995074	5098186	103113	+	239985	uc008aex.1	-37	ENSMUSG00000069729	Arid1b	AT rich interactive domain 1B (SWI-like)
605	chr17	4995053	4995053	1	*	2.09957e-07	0.00378228	3.84421e-05	0.00374383	0.000214705	0.000243827	2.29084e-05	0.000220918	TRUE	Promoter (<=1kb)	chr17	4995074	5098186	103113	+	239985	uc008aex.1	-21	ENSMUSG00000069729	Arid1b	AT rich interactive domain 1B (SWI-like)
606	chr17	4995056	4995056	1	*	2.09957e-07	0.00378228	3.84421e-05	0.00374383	2.69866e-15	0.000253218	0.347505	-0.347251	FALSE	Promoter (<=1kb)	chr17	4995074	5098186	103113	+	239985	uc008aex.1	-18	ENSMUSG00000069729	Arid1b	AT rich interactive domain 1B (SWI-like)
607	chr17	4995059	4995059	1	*	2.09957e-07	0.00378228	3.84421e-05	0.00374383	0.000168277	0.000264354	2.29176e-05	0.000241436	TRUE	Promoter (<=1kb)	chr17	4995074	5098186	103113	+	239985	uc008aex.1	-15	ENSMUSG00000069729	Arid1b	AT rich interactive domain 1B (SWI-like)
608	chr17	5841327	5841352	26	*	3.99816e-05	0.000823551	3.32988e-05	0.000790252	0.00126314	0.00296014	0.0999827	-0.0969933	FALSE	Promoter (<=1kb)	chr17	5841380	5930711	89332	+	66616	uc008afj.1	-53	ENSMUSG00000002365	Snx9	sorting nexin 9
609	chr17	5841424	5841582	159	*	8.32841e-06	3.12888e-05	0.00187184	-0.00184103	2.70673e-06	0.00145556	2.79946e-05	0.00142757	FALSE	Promoter (<=1kb)	chr17	5841380	5930711	89332	+	66616	uc008afj.1	202	ENSMUSG00000002365	Snx9	sorting nexin 9
610	chr17	8525013	8525056	44	*	2.31452e-07	3.28835e-05	0.00227856	-0.00224607	6.88743e-09	0.00305467	2.38666e-05	0.00303083	FALSE	Promoter (1-2kb)	chr17	8526801	8986648	459848	+	23984	uc008ajr.1	-1788	ENSMUSG00000023868	Pde10a	phosphodiesterase 10A
611	chr17	8801181	8801302	122	*	5.83383e-11	0.382723	0.00101938	0.381703	4.82595e-09	0.325924	0.00169635	0.324178	TRUE	Promoter (<=1kb)	chr17	8801745	8899189	97445	+	23984	uc012ajt.1	-564	ENSMUSG00000023868	Pde10a	phosphodiesterase 10A
612	chr17	8802000	8802033	34	*	4.06947e-12	3.66486e-05	0.00704865	-0.00701183	7.50817e-08	0.0036513	0.327431	-0.32378	TRUE	Promoter (<=1kb)	chr17	8801745	8899189	97445	+	23984	uc012ajt.1	288	ENSMUSG00000023868	Pde10a	phosphodiesterase 10A
613	chr17	10318625	10318702	78	*	4.819e-11	0.38388	0.00146922	0.382434	4.31337e-09	0.00356072	3.04868e-05	0.00353023	TRUE	Promoter (<=1kb)	chr17	10206471	10319361	112891	-	19317	uc008akb.2	659	ENSMUSG00000062078	Qk	quaking
614	chr17	15564275	15564367	93	*	4.52001e-05	3.91624e-05	0.00210837	-0.00206773	6.15625e-07	0.308466	0.003684	0.304782	FALSE	Promoter (<=1kb)	chr17	15553235	15564340	11106	-	213389	uc008aos.1	0	ENSMUSG00000051977	Prdm9	PR domain containing 9
615	chr17	15705005	15705008	4	*	0.00013295	0.258811	0.00279858	0.256012	0.00208048	0.00328035	0.0783042	-0.0750238	FALSE	Promoter (<=1kb)	chr17	15704967	15728387	23421	+	12648	uc012akw.1	41	ENSMUSG00000023852	Chd1	chromodomain helicase DNA binding protein 1
616	chr17	15705144	15705245	102	*	0.000429205	0.0010995	5.91555e-05	0.00104034	3.7211e-09	0.34159	0.0020891	0.339501	TRUE	Promoter (<=1kb)	chr17	15704967	15728387	23421	+	12648	uc012akw.1	278	ENSMUSG00000023852	Chd1	chromodomain helicase DNA binding protein 1
617	chr17	15705866	15705921	56	*	3.15746e-05	0.0040775	9.53634e-05	0.00398214	6.7956e-09	3.93852e-05	0.00504275	-0.00500348	FALSE	Promoter (<=1kb)	chr17	15704967	15728387	23421	+	12648	uc012akw.1	954	ENSMUSG00000023852	Chd1	chromodomain helicase DNA binding protein 1
618	chr17	24455104	24455152	49	*	7.74414e-11	0.38178	0.00120394	0.380576	0.000162196	2.77685e-05	0.000441397	-0.000413629	FALSE	Promoter (<=1kb)	chr17	24443778	24455392	11615	-	13560	uc008avy.2	240	ENSMUSG00000024137	E4f1	E4F transcription factor 1
619	chr17	24455172	24455172	1	*	7.74414e-11	0.38178	0.00120394	0.380576	3.53368e-10	0.333179	0.00121607	0.331963	TRUE	Promoter (<=1kb)	chr17	24443778	24455392	11615	-	13560	uc008avy.2	220	ENSMUSG00000024137	E4f1	E4F transcription factor 1
620	chr17	24455175	24455175	1	*	7.74414e-11	0.38178	0.00120394	0.380576	1.7848e-05	3.42594e-05	0.00132317	-0.00128891	FALSE	Promoter (<=1kb)	chr17	24443778	24455392	11615	-	13560	uc008avy.2	217	ENSMUSG00000024137	E4f1	E4F transcription factor 1
621	chr17	24455188	24455194	7	*	7.74414e-11	0.38178	0.00120394	0.380576	1.66467e-09	0.333854	0.00147628	0.332377	TRUE	Promoter (<=1kb)	chr17	24443778	24455392	11615	-	13560	uc008avy.2	198	ENSMUSG00000024137	E4f1	E4F transcription factor 1
622	chr17	24455197	24455215	19	*	7.74414e-11	0.38178	0.00120394	0.380576	6.75967e-06	2.93597e-05	0.00152782	-0.00149748	FALSE	Promoter (<=1kb)	chr17	24443778	24455392	11615	-	13560	uc008avy.2	177	ENSMUSG00000024137	E4f1	E4F transcription factor 1
623	chr17	24455222	24455222	1	*	7.74414e-11	0.38178	0.00120394	0.380576	5.57705e-10	0.344587	0.00142244	0.343165	TRUE	Promoter (<=1kb)	chr17	24443778	24455392	11615	-	13560	uc008avy.2	170	ENSMUSG00000024137	E4f1	E4F transcription factor 1
624	chr17	24455226	24455226	1	*	7.74414e-11	0.38178	0.00120394	0.380576	1.78717e-06	2.39173e-05	0.00132526	-0.00130134	FALSE	Promoter (<=1kb)	chr17	24443778	24455392	11615	-	13560	uc008avy.2	166	ENSMUSG00000024137	E4f1	E4F transcription factor 1
625	chr17	25273201	25273250	50	*	8.56061e-05	3.11732e-05	0.000924789	-0.000893615	2.64903e-09	0.311948	0.00152556	0.310423	FALSE	Promoter (<=1kb)	chr17	25260511	25273914	13404	-	22196	uc008bai.2	664	ENSMUSG00000015120	Ube2i	ubiquitin-conjugating enzyme E2I
626	chr17	25861694	25861769	76	*	5.44705e-07	0.00388843	4.1147e-05	0.00384938	6.60542e-09	0.344769	0.00249814	0.342271	TRUE	Promoter (<=1kb)	chr17	25844734	25861515	16782	-	106618	uc008bcj.2	-179	ENSMUSG00000073434	Wdr90	WD repeat domain 90
627	chr17	26414922	26414984	63	*	0.00022075	3.09386e-05	0.000611885	-0.000580946	8.29494e-14	0.346737	0.000400984	0.346337	FALSE	Promoter (<=1kb)	chr17	26414965	26446342	31378	+	240055	uc008bed.2	0	ENSMUSG00000034413	Neurl1b	neuralized E3 ubiquitin protein ligase 1B
628	chr17	26973353	26973356	4	*	6.02211e-06	0.247231	0.00274664	0.244485	0.00400331	0.00227516	0.0513885	-0.0491134	FALSE	Promoter (<=1kb)	chr17	26973179	26976395	3217	+	474156	uc008bfb.1	177	ENSMUSG00000079605	Zbtb9	zinc finger and BTB domain containing 9
629	chr17	27820652	27820676	25	*	3.25985e-13	3.07216e-05	0.00288673	-0.00285601	1.47396e-06	2.58306e-05	0.000721117	-0.000695308	TRUE	Promoter (<=1kb)	chr17	27751232	27820542	69311	-	224647	uc008bpp.2	-110	ENSMUSG00000056692	D17Wsu92e	DNA segment, Chr 17, Wayne State University 92, expressed
630	chr17	27909596	27909629	34	*	3.15542e-06	0.00338705	5.86426e-05	0.00332286	4.24582e-08	0.330403	0.00299365	0.327409	TRUE	Promoter (<=1kb)	chr17	27909306	28062779	153474	+	224650	uc008bpv.2	323	ENSMUSG00000024219	Anks1	ankyrin repeat and SAM domain containing 1
631	chr17	28080587	28080625	39	*	4.97133e-08	0.357793	0.0034578	0.354301	6.59202e-12	0.000757538	0.338694	-0.338005	FALSE	Promoter (<=1kb)	chr17	28066747	28080584	13838	-	21463	uc008bqa.1	-3	ENSMUSG00000062859	Tcp11	t-complex protein 11
632	chr17	28801449	28801597	149	*	1.53633e-09	0.376037	0.00173881	0.374331	2.36009e-11	0.345655	0.000940441	0.344721	TRUE	Promoter (<=1kb)	chr17	28801126	28838789	37664	+	268936	uc008brp.1	471	ENSMUSG00000063952	Brpf3	bromodomain and PHD finger containing, 3
633	chr17	28801449	28801597	149	*	2.12343e-05	3.19769e-05	0.00148374	-0.00145176	2.36009e-11	0.345655	0.000940441	0.344721	FALSE	Promoter (<=1kb)	chr17	28801126	28838789	37664	+	268936	uc008brp.1	471	ENSMUSG00000063952	Brpf3	bromodomain and PHD finger containing, 3
634	chr17	28952296	28952405	110	*	1.60963e-05	0.00137585	3.50846e-05	0.00134067	1.99102e-13	0.000500493	0.344366	-0.343196	FALSE	Promoter (<=1kb)	chr17	28952466	28967937	15472	+	66989	uc008brw.1	-170	ENSMUSG00000005936	Kctd20	potassium channel tetramerisation domain containing 20
635	chr17	28952513	28952513	1	*	1.60963e-05	0.00137585	3.50846e-05	0.00134067	6.89965e-06	0.315627	0.00903503	0.306592	TRUE	Promoter (<=1kb)	chr17	28952466	28967937	15472	+	66989	uc008brw.1	47	ENSMUSG00000005936	Kctd20	potassium channel tetramerisation domain containing 20
636	chr17	29549767	29549902	136	*	1.94452e-07	0.00650427	6.13354e-05	0.00644798	3.69518e-06	5.69012e-05	0.00349524	-0.0034485	FALSE	Promoter (<=1kb)	chr17	29549802	29606808	57007	+	381085	uc008btd.1	0	ENSMUSG00000042203	Tbc1d22b	TBC1 domain family, member 22B
637	chr17	30005088	30005331	244	*	1.4674e-08	0.00561585	5.29581e-05	0.00557011	5.95192e-08	0.0219707	0.000222087	0.0217672	TRUE	Promoter (<=1kb)	chr17	30005087	30210020	204934	+	21769	uc008btp.1	244	ENSMUSG00000044477	Zfand3	zinc finger, AN1-type domain 3
638	chr17	31565399	31565540	142	*	9.01198e-06	0.00157611	3.44663e-05	0.00154164	0.000275628	0.032532	0.00227473	0.0302572	TRUE	Promoter (<=1kb)	chr17	31564773	31607693	42921	+	18771	uc008bvh.2	767	ENSMUSG00000006705	Pknox1	Pbx/knotted 1 homeobox
639	chr17	33358945	33358950	6	*	4.28819e-06	0.00263956	4.16003e-05	0.00259796	0.000158521	0.008049	0.251768	-0.243719	FALSE	Promoter (<=1kb)	chr17	33333728	33358878	25151	-	224694	uc008byi.1	-67	ENSMUSG00000003929	Zfp81	zinc finger protein 81
640	chr17	33890726	33890802	77	*	1.84406e-05	0.000958465	3.10649e-05	0.0009274	7.69893e-10	0.00240189	2.40599e-05	0.00237783	TRUE	Promoter (<=1kb)	chr17	33875666	33890633	14968	-	100502766	uc008bzw.2	-93	ENSMUSG00000079553	Kifc1	kinesin family member C1
641	chr17	33955298	33955318	21	*	3.77969e-05	0.00117139	3.79351e-05	0.00113345	4.94396e-09	2.59187e-05	0.00433368	-0.00430776	FALSE	Promoter (<=1kb)	chr17	33951999	33955641	3643	-	20084	uc008cal.1	323	ENSMUSG00000008668	Rps18	ribosomal protein S18
642	chr17	34032270	34032382	113	*	7.93783e-05	3.20464e-05	0.00102916	-0.000997109	1.85532e-05	0.000607309	2.39356e-05	0.000583373	FALSE	Promoter (<=1kb)	chr17	34032350	34038403	6054	+	20182	uc008caz.2	0	ENSMUSG00000039656	Rxrb	retinoid X receptor beta
643	chr17	34032457	34032457	1	*	1.24022e-08	0.0162766	3.87149e-05	0.0162379	2.86411e-18	9.55526e-05	0.346361	-0.346265	FALSE	Promoter (<=1kb)	chr17	34032350	34038403	6054	+	20182	uc008caz.2	107	ENSMUSG00000039656	Rxrb	retinoid X receptor beta
644	chr17	43017077	43017123	47	*	4.78101e-07	0.373121	0.00587913	0.367242	2.4363e-05	0.0081397	0.000103376	0.00803632	TRUE	Promoter (<=1kb)	chr17	43016555	43038728	22174	+	94185	uc008cou.1	568	ENSMUSG00000023915	Tnfrsf21	tumor necrosis factor receptor superfamily, member 21
645	chr17	46248191	46248218	28	*	0.000104812	2.99262e-05	0.000714413	-0.000684487	2.53794e-10	0.334426	0.00118897	0.333237	FALSE	Promoter (<=1kb)	chr17	46248080	46252537	4458	+	28064	uc008csd.2	138	ENSMUSG00000071074	Yipf3	Yip1 domain family, member 3
646	chr17	46646214	46646273	60	*	2.94433e-09	0.381144	0.00277342	0.378371	6.4996e-12	0.000767465	0.346548	-0.345781	FALSE	Promoter (<=1kb)	chr17	46646248	46650132	3885	+	27398	uc008ctm.1	0	ENSMUSG00000002767	Mrpl2	mitochondrial ribosomal protein L2
647	chr17	46646279	46646279	1	*	2.94433e-09	0.381144	0.00277342	0.378371	0.000194854	0.00310887	7.95623e-05	0.00302931	TRUE	Promoter (<=1kb)	chr17	46646248	46650132	3885	+	27398	uc008ctm.1	31	ENSMUSG00000002767	Mrpl2	mitochondrial ribosomal protein L2
648	chr17	46646282	46646282	1	*	2.94433e-09	0.381144	0.00277342	0.378371	1.92204e-10	0.00123274	0.345853	-0.34462	FALSE	Promoter (<=1kb)	chr17	46646248	46650132	3885	+	27398	uc008ctm.1	34	ENSMUSG00000002767	Mrpl2	mitochondrial ribosomal protein L2
649	chr17	46646284	46646284	1	*	2.94433e-09	0.381144	0.00277342	0.378371	2.36603e-06	0.00121917	2.39114e-05	0.00119526	TRUE	Promoter (<=1kb)	chr17	46646248	46650132	3885	+	27398	uc008ctm.1	36	ENSMUSG00000002767	Mrpl2	mitochondrial ribosomal protein L2
650	chr17	46650657	46650704	48	*	1.5652e-07	4.63656e-05	0.00755958	-0.00751321	1.76749e-09	3.52973e-05	0.00550348	-0.00546818	TRUE	Promoter (<=1kb)	chr17	46650572	46657221	6650	+	66515	uc008ctq.1	132	ENSMUSG00000038545	Cul7	cullin 7
651	chr17	46857802	46857980	179	*	7.3346e-06	0.00402346	5.83253e-05	0.00395656	1.35683e-10	0.00117106	0.344463	-0.343345	FALSE	Distal Intergenic	chr17	46798116	46832314	34199	-	210982	uc008cul.2	-25488	ENSMUSG00000036568	Gltscr1l	GLTSCR1-like
652	chr17	46890517	46890548	32	*	2.84878e-07	0.00792816	7.60531e-05	0.00785211	0.000495599	0.00831284	0.000303251	0.00800988	TRUE	Promoter (<=1kb)	chr17	46890621	46892463	1843	+	72726	uc008cum.1	-104	ENSMUSG00000036430	Tbcc	tubulin-specific chaperone C
653	chr17	47139718	47139853	136	*	0.00438265	0.00346346	0.103014	-0.0995505	1.70766e-05	0.00501916	0.223789	-0.219911	TRUE	Promoter (1-2kb)	chr17	47140942	47329536	188595	+	224829	uc008cur.1	-1224	#N/A	Trerf1	transcriptional regulating factor 1
654	chr17	47139886	47139896	11	*	6.58734e-07	3.71467e-05	0.00255783	-0.00252069	1.51879e-08	0.00199444	0.313475	-0.311481	TRUE	Promoter (1-2kb)	chr17	47140942	47329536	188595	+	224829	uc008cur.1	-1056	#N/A	Trerf1	transcriptional regulating factor 1
655	chr17	47139927	47139951	25	*	6.58734e-07	3.71467e-05	0.00255783	-0.00252069	7.03243e-06	0.000898062	2.57819e-05	0.00087228	FALSE	Promoter (1-2kb)	chr17	47140942	47329536	188595	+	224829	uc008cur.1	-1015	#N/A	Trerf1	transcriptional regulating factor 1
656	chr17	47139955	47139958	4	*	6.58734e-07	3.71467e-05	0.00255783	-0.00252069	2.21832e-13	0.000474719	0.346797	-0.346322	TRUE	Promoter (<=1kb)	chr17	47140942	47329536	188595	+	224829	uc008cur.1	-987	#N/A	Trerf1	transcriptional regulating factor 1
657	chr17	47139965	47139965	1	*	6.58734e-07	3.71467e-05	0.00255783	-0.00252069	8.25154e-05	0.00031261	2.30131e-05	0.000289597	FALSE	Promoter (<=1kb)	chr17	47140942	47329536	188595	+	224829	uc008cur.1	-977	#N/A	Trerf1	transcriptional regulating factor 1
658	chr17	47139969	47139969	1	*	6.58734e-07	3.71467e-05	0.00255783	-0.00252069	8.07217e-16	0.00022504	0.347531	-0.347306	TRUE	Promoter (<=1kb)	chr17	47140942	47329536	188595	+	224829	uc008cur.1	-973	#N/A	Trerf1	transcriptional regulating factor 1
659	chr17	50509624	50509624	1	*	0.00706227	0.0416768	0.0029414	0.0387354	4.5514e-05	0.000803632	3.53075e-05	0.000768324	TRUE	Promoter (<=1kb)	chr17	50509547	50688494	178948	+	224860	uc012avf.1	77	ENSMUSG00000038910	Plcl2	phospholipase C-like 2
660	chr17	50509794	50509815	22	*	2.23285e-05	3.1605e-05	0.00169302	-0.00166041	4.32588e-12	0.000807548	0.346528	-0.34572	TRUE	Promoter (<=1kb)	chr17	50509547	50688494	178948	+	224860	uc012avf.1	268	ENSMUSG00000038910	Plcl2	phospholipase C-like 2
661	chr17	50509920	50509985	66	*	2.96094e-08	0.375558	0.00326332	0.368612	5.86778e-07	0.0119635	8.00066e-05	0.0118835	TRUE	Promoter (<=1kb)	chr17	50509547	50688494	178948	+	224860	uc012avf.1	438	ENSMUSG00000038910	Plcl2	phospholipase C-like 2
662	chr17	51178575	51179006	432	*	1.16486e-13	0.384207	0.000519835	0.383687	1.20003e-08	0.330161	0.00270486	0.324946	TRUE	Promoter (<=1kb)	chr17	50733127	51179352	446226	-	72238	uc008cyy.3	346	ENSMUSG00000023923	Tbc1d5	TBC1 domain family, member 5
663	chr17	51178575	51179006	432	*	3.96469e-07	3.00571e-05	0.00143116	-0.00140121	1.20003e-08	0.330161	0.00270486	0.324946	FALSE	Promoter (<=1kb)	chr17	50733127	51179352	446226	-	72238	uc008cyy.3	346	ENSMUSG00000023923	Tbc1d5	TBC1 domain family, member 5
664	chr17	51832858	51832925	68	*	1.07969e-05	4.13594e-05	0.00275521	-0.00271385	4.22091e-11	2.30546e-05	0.0012433	-0.00122025	TRUE	Promoter (<=1kb)	chr17	51736187	51832647	96461	-	20230	uc008czf.2	-211	ENSMUSG00000023927	Satb1	special AT-rich sequence binding protein 1
665	chr17	56140357	56140407	51	*	7.28283e-10	6.12373e-05	0.0087742	-0.00870721	3.81779e-05	0.272448	0.00694553	0.265502	FALSE	Promoter (<=1kb)	chr17	56123085	56140343	17259	-	20359	uc008dbe.1	-14	ENSMUSG00000001227	Sema6b	sema domain, transmembrane domain (TM), and cytoplasmic domain, (semaphorin) 6B
666	chr17	56183622	56183622	1	*	0.00304874	0.0765992	0.00877237	0.0678268	0.00450728	0.0131565	0.135463	-0.122306	FALSE	Promoter (<=1kb)	chr17	56176541	56183920	7380	-	28106	uc008dbg.1	298	ENSMUSG00000019579	Mydgf	myeloid derived growth factor
667	chr17	63499285	63499482	198	*	9.27497e-10	0.383904	0.00150585	0.382398	8.6581e-12	0.000689172	0.33116	-0.330722	FALSE	Promoter (1-2kb)	chr17	63045952	63500580	454629	-	50758	uc008dfl.2	1098	ENSMUSG00000023965	Fbxl17	F-box and leucine-rich repeat protein 17
668	chr17	66519597	66519613	17	*	0.000191946	0.000740606	3.20489e-05	0.000708557	0.000359659	0.00259797	0.000102552	0.00249542	TRUE	Promoter (<=1kb)	chr17	66494512	66519670	25159	-	19328	uc008djy.1	57	ENSMUSG00000023460	Rab12	RAB12, member RAS oncogene family
669	chr17	71475926	71475973	48	*	0.000148681	3.01633e-05	0.000670071	-0.000639907	4.08393e-09	0.340756	0.00233075	0.338359	FALSE	Promoter (<=1kb)	chr17	71344493	71475343	130851	-	74355	uc008dmh.2	-583	ENSMUSG00000024054	Smchd1	SMC hinge domain containing 1
670	chr17	73107863	73107888	26	*	1.84297e-07	0.00321517	3.62188e-05	0.00317925	1.14382e-10	0.00713277	4.74947e-05	0.00708528	TRUE	Promoter (<=1kb)	chr17	73107985	73243366	135382	+	225010	uc008dnh.2	-122	ENSMUSG00000054469	Lclat1	lysocardiolipin acyltransferase 1
671	chr17	73107891	73107891	1	*	1.84297e-07	0.00321517	3.62188e-05	0.00317925	2.134e-06	0.00769322	0.323593	-0.3159	FALSE	Promoter (<=1kb)	chr17	73107985	73243366	135382	+	225010	uc008dnh.2	-94	ENSMUSG00000054469	Lclat1	lysocardiolipin acyltransferase 1
672	chr17	73107895	73108024	130	*	1.84297e-07	0.00321517	3.62188e-05	0.00317925	1.11154e-07	0.342007	0.00464585	0.337692	TRUE	Promoter (<=1kb)	chr17	73107985	73243366	135382	+	225010	uc008dnh.2	0	ENSMUSG00000054469	Lclat1	lysocardiolipin acyltransferase 1
673	chr17	83706096	83706141	46	*	0.000461998	0.00015169	0.00625039	-0.0060987	6.14379e-06	6.61528e-05	0.00635763	-0.00629148	TRUE	Promoter (<=1kb)	chr17	83706163	83792877	86715	+	116871	uc008dsf.2	-67	ENSMUSG00000055817	Mta3	metastasis associated 3
674	chr17	83706096	83706141	46	*	1.02959e-07	0.36963	0.00326836	0.366362	6.14379e-06	6.61528e-05	0.00635763	-0.00629148	FALSE	Promoter (<=1kb)	chr17	83706163	83792877	86715	+	116871	uc008dsf.2	-67	ENSMUSG00000055817	Mta3	metastasis associated 3
675	chr17	83706096	83706141	46	*	3.00985e-05	4.65249e-05	0.00283249	-0.00278596	6.14379e-06	6.61528e-05	0.00635763	-0.00629148	TRUE	Promoter (<=1kb)	chr17	83706163	83792877	86715	+	116871	uc008dsf.2	-67	ENSMUSG00000055817	Mta3	metastasis associated 3
676	chr17	83861634	83861710	77	*	1.71556e-12	0.435895	0.000689722	0.435206	3.73852e-09	3.22456e-05	0.0040338	-0.00399746	FALSE	Distal Intergenic	chr17	83831354	83846790	15437	-	107766	uc008dsk.1	-14844	ENSMUSG00000000673	Haao	3-hydroxyanthranilate 3,4-dioxygenase
677	chr17	84188266	84188466	201	*	3.96359e-05	0.00391957	9.84621e-05	0.00382111	8.87393e-08	5.07691e-05	0.00782335	-0.00776946	FALSE	Promoter (<=1kb)	chr17	84183928	84187947	4020	-	12193	uc008dsq.2	-319	ENSMUSG00000045817	Zfp36l2	zinc finger protein 36, C3H type-like 2
678	chr17	84188481	84188485	5	*	3.96359e-05	0.00391957	9.84621e-05	0.00382111	4.55286e-07	0.00623632	7.45288e-05	0.00616179	TRUE	Promoter (<=1kb)	chr17	84183928	84187947	4020	-	12193	uc008dsq.2	-534	ENSMUSG00000045817	Zfp36l2	zinc finger protein 36, C3H type-like 2
679	chr17	84188493	84188524	32	*	3.96359e-05	0.00391957	9.84621e-05	0.00382111	6.45492e-06	0.00637723	0.293309	-0.286931	FALSE	Promoter (<=1kb)	chr17	84183928	84187947	4020	-	12193	uc008dsq.2	-546	ENSMUSG00000045817	Zfp36l2	zinc finger protein 36, C3H type-like 2
680	chr17	86963482	86963490	9	*	3.89176e-10	0.384748	0.00194918	0.382719	6.41498e-09	0.3417	0.00234721	0.339353	TRUE	Promoter (<=1kb)	chr17	86963111	87000069	36959	+	104215	uc008dum.1	379	ENSMUSG00000024143	Rhoq	ras homolog gene family, member Q
681	chr17	86963501	86963504	4	*	3.89176e-10	0.384748	0.00194918	0.382719	9.92883e-08	2.47881e-05	0.00156176	-0.00153697	FALSE	Promoter (<=1kb)	chr17	86963111	87000069	36959	+	104215	uc008dum.1	393	ENSMUSG00000024143	Rhoq	ras homolog gene family, member Q
682	chr17	86963505	86963505	1	*	3.89176e-10	0.384748	0.00194918	0.382719	2.35163e-10	0.344921	0.00146214	0.343459	TRUE	Promoter (<=1kb)	chr17	86963111	87000069	36959	+	104215	uc008dum.1	394	ENSMUSG00000024143	Rhoq	ras homolog gene family, member Q
683	chr17	86963508	86963661	154	*	3.89176e-10	0.384748	0.00194918	0.382719	1.3922e-07	2.44021e-05	0.0013499	-0.0013255	FALSE	Promoter (<=1kb)	chr17	86963111	87000069	36959	+	104215	uc008dum.1	550	ENSMUSG00000024143	Rhoq	ras homolog gene family, member Q
684	chr17	86963744	86963785	42	*	3.89176e-10	0.384748	0.00194918	0.382719	4.84772e-08	0.317739	0.00329894	0.31444	TRUE	Promoter (<=1kb)	chr17	86963111	87000069	36959	+	104215	uc008dum.1	674	ENSMUSG00000024143	Rhoq	ras homolog gene family, member Q
685	chr17	88597806	88597855	50	*	1.82548e-11	0.382633	0.000993612	0.381639	5.40475e-08	0.00407253	0.34339	-0.339318	FALSE	Distal Intergenic	chr17	88578730	88588367	9638	+	73825	uc008dvp.2	19125	ENSMUSG00000034709	Ppp1r21	protein phosphatase 1, regulatory subunit 21
686	chr18	10609942	10610043	102	*	2.31674e-13	0.384521	0.000642873	0.383775	4.61596e-08	2.82568e-05	0.00134081	-0.00131255	FALSE	Promoter (<=1kb)	chr18	10566512	10610352	43841	-	77805	uc008eau.2	309	ENSMUSG00000024293	Esco1	establishment of cohesion 1 homolog 1 (S. cerevisiae)
687	chr18	14683052	14683102	51	*	0.000203905	0.00325669	0.17866	-0.175403	2.89669e-07	5.70751e-05	0.00412375	-0.00406667	TRUE	Promoter (<=1kb)	chr18	14625629	14682914	57286	-	268996	uc008ede.1	-138	ENSMUSG00000037013	Ss18	synovial sarcoma translocation, Chromosome 18
688	chr18	14683052	14683102	51	*	3.4958e-05	0.00072144	3.05624e-05	0.000690878	2.89669e-07	5.70751e-05	0.00412375	-0.00406667	FALSE	Promoter (<=1kb)	chr18	14625629	14682914	57286	-	268996	uc008ede.1	-138	ENSMUSG00000037013	Ss18	synovial sarcoma translocation, Chromosome 18
689	chr18	24529508	24529508	1	*	6.09517e-10	0.380354	0.0016371	0.378673	3.72149e-05	3.17693e-05	0.00106212	-0.00103035	FALSE	Promoter (<=1kb)	chr18	24484962	24530204	45243	-	225283	uc008egu.1	696	ENSMUSG00000040446	Rprd1a	regulation of nuclear pre-mRNA domain containing 1A
690	chr18	24529515	24529516	2	*	6.09517e-10	0.380354	0.0016371	0.378673	2.45736e-10	0.337177	0.00111075	0.336066	TRUE	Promoter (<=1kb)	chr18	24484962	24530204	45243	-	225283	uc008egu.1	688	ENSMUSG00000040446	Rprd1a	regulation of nuclear pre-mRNA domain containing 1A
691	chr18	24529529	24529533	5	*	6.09517e-10	0.380354	0.0016371	0.378673	1.17178e-05	2.91572e-05	0.00127435	-0.00124519	FALSE	Promoter (<=1kb)	chr18	24484962	24530204	45243	-	225283	uc008egu.1	671	ENSMUSG00000040446	Rprd1a	regulation of nuclear pre-mRNA domain containing 1A
692	chr18	24529534	24529657	124	*	6.09517e-10	0.380354	0.0016371	0.378673	1.96292e-07	0.333282	0.00416122	0.32912	TRUE	Promoter (<=1kb)	chr18	24484962	24530204	45243	-	225283	uc008egu.1	547	ENSMUSG00000040446	Rprd1a	regulation of nuclear pre-mRNA domain containing 1A
693	chr18	24530025	24530073	49	*	5.51497e-07	0.00144215	3.08313e-05	0.00141132	6.23018e-09	0.00217032	0.335096	-0.332926	FALSE	Promoter (<=1kb)	chr18	24484962	24530204	45243	-	225283	uc008egu.1	131	ENSMUSG00000040446	Rprd1a	regulation of nuclear pre-mRNA domain containing 1A
694	chr18	24530170	24530203	34	*	6.65912e-05	0.00404735	8.47001e-05	0.00396265	0.00152358	0.269817	0.0163264	0.253491	TRUE	Promoter (<=1kb)	chr18	24484962	24530204	45243	-	225283	uc008egu.1	1	ENSMUSG00000040446	Rprd1a	regulation of nuclear pre-mRNA domain containing 1A
695	chr18	31634816	31635018	203	*	9.89693e-10	0.376251	0.00169566	0.374555	2.00652e-05	0.28385	0.00635571	0.276816	TRUE	Promoter (<=1kb)	chr18	31634383	31713014	78632	+	269003	uc008eib.1	635	ENSMUSG00000024260	Sap130	Sin3A associated protein
696	chr18	32068153	32068203	51	*	0.0003245	0.00269084	9.28961e-05	0.00259246	1.24549e-06	0.0221282	0.000179587	0.0219401	TRUE	Promoter (<=1kb)	chr18	32067734	32104331	36598	+	73473	uc008eiy.2	469	ENSMUSG00000024384	Iws1	IWS1 homolog (S. cerevisiae)
697	chr18	34006266	34006484	219	*	4.13869e-08	0.00491288	4.43031e-05	0.00486858	5.93338e-10	0.000166534	0.0110607	-0.0109303	FALSE	Promoter (<=1kb)	chr18	33796327	34006422	210096	-	13824	uc008ejx.1	0	ENSMUSG00000024376	Epb41l4a	erythrocyte membrane protein band 4.1 like 4a
698	chr18	34006266	34006484	219	*	3.72782e-06	0.311976	0.00919813	0.298684	5.93338e-10	0.000166534	0.0110607	-0.0109303	FALSE	Promoter (<=1kb)	chr18	33796327	34006422	210096	-	13824	uc008ejx.1	0	ENSMUSG00000024376	Epb41l4a	erythrocyte membrane protein band 4.1 like 4a
699	chr18	34931853	34931953	101	*	2.28142e-05	0.000311136	0.0233956	-0.0230845	2.44315e-12	0.341617	0.000687731	0.340941	FALSE	Promoter (<=1kb)	chr18	34902785	34932003	29219	-	225363	uc008elu.1	50	ENSMUSG00000024360	Etf1	eukaryotic translation termination factor 1
700	chr18	35553403	35553449	47	*	0.000113862	3.09994e-05	0.000769283	-0.000738284	5.46215e-07	0.00223843	2.64767e-05	0.00221195	FALSE	Promoter (<=1kb)	chr18	35553410	35557230	3821	+	100503380	uc008eme.1	0	ENSMUSG00000097769	Snhg4	small nucleolar RNA host gene 4
701	chr18	38419501	38419536	36	*	1.90334e-05	0.00350129	6.40232e-05	0.00343727	8.72215e-08	0.340626	0.00374617	0.33688	TRUE	Promoter (<=1kb)	chr18	38418975	38464406	45432	+	65113	uc008esj.1	561	ENSMUSG00000024425	Ndfip1	Nedd4 family interacting protein 1
702	chr18	38601454	38601553	100	*	1.02244e-06	0.376766	0.00573264	0.37098	1.48856e-12	0.000586644	0.344754	-0.34402	FALSE	Promoter (<=1kb)	chr18	38586265	38601268	15004	-	24066	uc008esl.1	-186	ENSMUSG00000024427	Spry4	sprouty homolog 4 (Drosophila)
703	chr18	60848905	60848951	47	*	2.55305e-05	3.58781e-05	0.00202204	-0.00198616	5.60291e-09	0.00219269	0.338095	-0.335903	TRUE	Promoter (<=1kb)	chr18	60813756	60848964	35209	-	21453	uc008fbb.2	13	ENSMUSG00000024613	Tcof1	Treacher Collins Franceschetti syndrome 1, homolog
704	chr18	61555149	61555149	1	*	3.92241e-09	0.384595	0.00238212	0.382213	4.75848e-10	0.00105381	0.315782	-0.314728	FALSE	Promoter (<=1kb)	chr18	61555582	61558238	2657	+	93687	uc008fcb.1	-433	ENSMUSG00000024576	Csnk1a1	casein kinase 1, alpha 1
705	chr18	61555150	61555150	1	*	3.92241e-09	0.384595	0.00238212	0.382213	0.000394728	0.00111414	5.25271e-05	0.00106161	TRUE	Promoter (<=1kb)	chr18	61555582	61558238	2657	+	93687	uc008fcb.1	-432	ENSMUSG00000024576	Csnk1a1	casein kinase 1, alpha 1
706	chr18	61555151	61555158	8	*	3.92241e-09	0.384595	0.00238212	0.382213	6.39174e-09	0.00138806	0.303163	-0.301775	FALSE	Promoter (<=1kb)	chr18	61555582	61558238	2657	+	93687	uc008fcb.1	-431	ENSMUSG00000024576	Csnk1a1	casein kinase 1, alpha 1
707	chr18	61555151	61555158	8	*	8.13605e-06	3.12898e-05	0.00218202	-0.00215054	6.39174e-09	0.00138806	0.303163	-0.301775	TRUE	Promoter (<=1kb)	chr18	61555582	61558238	2657	+	93687	uc008fcb.1	-431	ENSMUSG00000024576	Csnk1a1	casein kinase 1, alpha 1
708	chr18	61555167	61555168	2	*	8.13605e-06	3.12898e-05	0.00218202	-0.00215054	0.00128835	0.00214715	0.000109149	0.002038	FALSE	Promoter (<=1kb)	chr18	61555582	61558238	2657	+	93687	uc008fcb.1	-415	ENSMUSG00000024576	Csnk1a1	casein kinase 1, alpha 1
709	chr18	63692307	63692347	41	*	0.000298008	0.00112907	5.08096e-05	0.00107826	7.50334e-06	0.292133	0.00621516	0.285917	TRUE	Promoter (<=1kb)	chr18	63662801	63692359	29559	-	53382	uc008fdx.1	12	ENSMUSG00000024583	Txnl1	thioredoxin-like 1
710	chr18	65873432	65873476	45	*	5.76626e-06	0.00266537	4.11279e-05	0.00262424	0.000319383	0.000302454	0.0110887	-0.0107689	FALSE	Promoter (<=1kb)	chr18	65873479	65886596	13118	+	225642	uc008ffk.2	-47	ENSMUSG00000024517	Grp	gastrin releasing peptide
711	chr18	67391451	67391451	1	*	0.00279875	0.017604	0.281442	-0.263838	3.7458e-08	2.47946e-05	0.00187179	-0.001847	TRUE	Promoter (<=1kb)	chr18	67390731	67402749	12019	+	67951	uc008fmd.1	720	ENSMUSG00000001473	Tubb6	tubulin, beta 6 class V
712	chr18	67610405	67610451	47	*	6.42294e-11	0.384877	0.00122417	0.383598	9.14494e-09	0.00835592	4.68921e-05	0.00830902	TRUE	Promoter (<=1kb)	chr18	67519291	67610790	91500	-	68166	uc008fmp.1	339	ENSMUSG00000024533	Spire1	spire homolog 1 (Drosophila)
713	chr18	69346225	69346270	46	*	0.000201132	0.00611667	0.247409	-0.241292	1.97965e-10	0.00386686	2.33931e-05	0.00384347	FALSE	Promoter (<=1kb)	chr18	69346252	69687967	341716	+	21413	uc008fnt.1	0	ENSMUSG00000053477	Tcf4	transcription factor 4
714	chr18	69346351	69346549	199	*	5.05905e-05	0.00107873	3.6797e-05	0.00104279	7.16936e-06	0.00666548	0.327501	-0.320825	FALSE	Promoter (<=1kb)	chr18	69346252	69687967	341716	+	21413	uc008fnt.1	297	ENSMUSG00000053477	Tcf4	transcription factor 4
715	chr18	69346351	69346549	199	*	4.10058e-06	4.00681e-05	0.00272241	-0.00268234	7.16936e-06	0.00666548	0.327501	-0.320825	TRUE	Promoter (<=1kb)	chr18	69346252	69687967	341716	+	21413	uc008fnt.1	297	ENSMUSG00000053477	Tcf4	transcription factor 4
716	chr18	73815318	73815417	100	*	0.000591119	0.00228586	9.98779e-05	0.00218598	1.77294e-05	0.00442443	0.255828	-0.251404	FALSE	Promoter (<=1kb)	chr18	73770040	73815392	45353	-	107029	uc008fox.1	0	ENSMUSG00000024556	Me2	malic enzyme 2, NAD(+)-dependent, mitochondrial
717	chr18	74442301	74442304	4	*	9.68641e-10	0.380379	0.00150498	0.378874	0.00208115	0.000228706	0.00314252	-0.00291381	FALSE	Promoter (<=1kb)	chr18	74442619	74659060	216442	+	17919	uc008fpo.1	-318	ENSMUSG00000025885	Myo5b	myosin VB
718	chr18	75000809	75000809	1	*	7.66944e-09	0.383038	0.00331666	0.379868	0.000669675	0.000115799	0.00422302	-0.00410722	FALSE	Promoter (<=1kb)	chr18	75001068	75001122	55	+	100217457	uc012bez.1	-259	ENSMUSG00000064871	Snord58b	small nucleolar RNA, C/D box 58B
719	chr18	75000813	75000887	75	*	7.66944e-09	0.383038	0.00331666	0.379868	1.05616e-05	0.000751155	2.36115e-05	0.000727446	TRUE	Promoter (<=1kb)	chr18	75001068	75001122	55	+	100217457	uc012bez.1	-255	ENSMUSG00000064871	Snord58b	small nucleolar RNA, C/D box 58B
720	chr18	76944406	76944406	1	*	2.81128e-11	0.384882	0.00138793	0.383494	1.8279e-07	4.53651e-05	0.00602547	-0.00598011	FALSE	Promoter (<=1kb)	chr18	76944418	76972171	27754	+	76987	uc008fqu.1	-12	ENSMUSG00000025421	Hdhd2	haloacid dehalogenase-like hydrolase domain containing 2
721	chr18	80150886	80150968	83	*	4.91089e-05	3.05448e-05	0.00105222	-0.00102168	8.12308e-06	0.00494691	9.0637e-05	0.00485578	FALSE	Promoter (<=1kb)	chr18	80127135	80151482	24348	-	240442	uc008fsk.1	514	ENSMUSG00000053950	Adnp2	ADNP homeobox 2
722	chr18	82911235	82911309	75	*	8.84964e-05	0.0030804	0.000100928	0.00297947	2.08758e-06	0.00202683	2.79176e-05	0.00199843	TRUE	Promoter (<=1kb)	chr18	82910879	83005314	94436	+	329003	uc008fuf.2	430	ENSMUSG00000058881	Zfp516	zinc finger protein 516
723	chr18	84085734	84085840	107	*	3.62604e-05	0.00180638	5.24276e-05	0.00175395	2.16316e-07	3.14086e-05	0.00249045	-0.00245939	FALSE	Promoter (<=1kb)	chr18	84011627	84086390	74764	-	110796	uc008ful.1	550	ENSMUSG00000046982	Tshz1	teashirt zinc finger family member 1
724	chr18	84088066	84088104	39	*	7.41119e-05	0.000583652	3.182e-05	0.000552297	4.67837e-08	2.6149e-05	0.0020977	-0.00207155	FALSE	Promoter (<=1kb)	chr18	84088158	84097514	9357	+	225791	uc008fun.1	-92	ENSMUSG00000049090	Zadh2	zinc binding alcohol dehydrogenase, domain containing 2
725	chr19	3283026	3283026	1	*	2.1012e-08	0.383434	0.00374427	0.37969	0.00307982	0.00120401	0.0299007	-0.0286967	FALSE	Promoter (<=1kb)	chr19	3259076	3283010	23935	-	20589	uc008fwa.1	-16	ENSMUSG00000024831	Ighmbp2	immunoglobulin mu binding protein 2
726	chr19	3283089	3283118	30	*	2.1012e-08	0.383434	0.00374427	0.37969	1.90858e-05	0.271263	0.00654516	0.26467	TRUE	Promoter (<=1kb)	chr19	3283047	3291197	8151	+	353242	uc008fwd.1	71	ENSMUSG00000024829	Mrpl21	mitochondrial ribosomal protein L21
727	chr19	3325474	3325569	96	*	4.65687e-05	0.00208624	4.38956e-05	0.00204234	3.69357e-05	0.0011564	3.69564e-05	0.00111596	TRUE	Promoter (2-3kb)	chr19	3323301	3385733	62433	+	12894	uc008fwf.2	2268	ENSMUSG00000024900	Cpt1a	carnitine palmitoyltransferase 1a, liver
728	chr19	3768183	3768203	21	*	4.22759e-05	3.10446e-05	0.00115535	-0.00112431	3.59816e-11	0.00089029	0.340895	-0.340005	TRUE	Promoter (<=1kb)	chr19	3767421	3806324	38904	+	225888	uc008fww.2	782	ENSMUSG00000045098	Suv420h1	suppressor of variegation 4-20 homolog 1 (Drosophila)
729	chr19	3768835	3768916	82	*	7.86321e-05	0.000658588	3.23427e-05	0.000626245	8.02045e-06	0.000213159	0.00504295	-0.00482979	FALSE	Promoter (1-2kb)	chr19	3767421	3806324	38904	+	225888	uc008fww.2	1495	ENSMUSG00000045098	Suv420h1	suppressor of variegation 4-20 homolog 1 (Drosophila)
730	chr19	4305933	4305938	6	*	0.000387646	0.00880256	0.000274185	0.00852838	4.0458e-13	0.000498065	0.344961	-0.344463	FALSE	Promoter (<=1kb)	chr19	4285999	4306222	20224	-	110355	uc008fzu.2	284	ENSMUSG00000024858	Adrbk1	adrenergic receptor kinase, beta 1
731	chr19	4305940	4305943	4	*	0.000387646	0.00880256	0.000274185	0.00852838	2.79297e-05	0.000555407	2.47749e-05	0.000530632	TRUE	Promoter (<=1kb)	chr19	4285999	4306222	20224	-	110355	uc008fzu.2	279	ENSMUSG00000024858	Adrbk1	adrenergic receptor kinase, beta 1
732	chr19	4305944	4305944	1	*	0.000387646	0.00880256	0.000274185	0.00852838	1.1644e-12	0.00058067	0.344571	-0.34399	FALSE	Promoter (<=1kb)	chr19	4285999	4306222	20224	-	110355	uc008fzu.2	278	ENSMUSG00000024858	Adrbk1	adrenergic receptor kinase, beta 1
733	chr19	4305946	4305946	1	*	0.000387646	0.00880256	0.000274185	0.00852838	2.13761e-05	0.000605855	2.4876e-05	0.000580979	TRUE	Promoter (<=1kb)	chr19	4285999	4306222	20224	-	110355	uc008fzu.2	276	ENSMUSG00000024858	Adrbk1	adrenergic receptor kinase, beta 1
734	chr19	4305987	4306060	74	*	0.000387646	0.00880256	0.000274185	0.00852838	5.37075e-16	0.000195478	0.34684	-0.346645	FALSE	Promoter (<=1kb)	chr19	4285999	4306222	20224	-	110355	uc008fzu.2	162	ENSMUSG00000024858	Adrbk1	adrenergic receptor kinase, beta 1
735	chr19	5388267	5388361	95	*	1.20897e-07	3.7964e-05	0.00408055	-0.00404457	5.96407e-11	0.00795998	2.9692e-05	0.00792718	FALSE	Promoter (<=1kb)	chr19	5388336	5390069	1734	+	414115	uc008gcv.2	0	#N/A	D330050I16Rik	RIKEN cDNA D330050I16 gene
736	chr19	5425304	5425333	30	*	5.42445e-05	0.00233719	7.17863e-05	0.00226541	1.68672e-08	0.00238405	0.335523	-0.333139	FALSE	Promoter (<=1kb)	chr19	5425144	5427316	2173	+	107242	uc008gda.2	189	ENSMUSG00000047423	AI837181	expressed sequence AI837181
737	chr19	5803649	5803732	84	*	1.54253e-06	0.457581	0.00355419	0.453838	0.000423437	0.152638	0.00440086	0.148237	TRUE	Promoter (<=1kb)	chr19	5795690	5802671	6982	-	72289	uc008gfj.2	-978	ENSMUSG00000092341	Malat1	metastasis associated lung adenocarcinoma transcript 1 (non-coding RNA)
738	chr19	6085688	6085715	28	*	0.000658675	0.272099	0.0130006	0.259098	5.99808e-05	0.230448	0.00634206	0.224106	TRUE	Promoter (<=1kb)	chr19	6085751	6091773	6023	+	67849	uc008ghi.1	-63	ENSMUSG00000024791	Cdca5	cell division cycle associated 5
739	chr19	6941495	6941552	58	*	3.82702e-05	3.03681e-05	0.000429538	-0.00039917	4.41437e-07	0.00113135	2.45653e-05	0.00110677	FALSE	Promoter (<=1kb)	chr19	6938070	6941507	3438	-	107173	uc008gjl.1	0	ENSMUSG00000024958	Gpr137	G protein-coupled receptor 137
740	chr19	6979593	6979672	80	*	0.000893048	0.00158371	8.12884e-05	0.00150242	0.000120362	0.00013419	0.00541386	-0.00527967	FALSE	Promoter (<=1kb)	chr19	6977739	6980461	2723	-	14227	uc008gjt.2	789	ENSMUSG00000056629	Fkbp2	FK506 binding protein 2
741	chr19	7241033	7241160	128	*	5.89135e-06	3.03802e-05	0.000591771	-0.000561502	2.95467e-07	3.15405e-05	0.00160953	-0.00158133	TRUE	Promoter (<=1kb)	chr19	7225668	7241222	15555	-	70999	uc008gkl.2	62	ENSMUSG00000024764	Naa40	N(alpha)-acetyltransferase 40, NatD catalytic subunit, homolog (S. cerevisiae)
742	chr19	7417683	7417748	66	*	4.72266e-07	0.00417765	4.46633e-05	0.00413299	2.39221e-07	2.89493e-05	0.00195394	-0.00192509	FALSE	Promoter (<=1kb)	chr19	7417625	7425904	8280	+	108899	uc008gkz.2	123	ENSMUSG00000053080	2700081O15Rik	RIKEN cDNA 2700081O15 gene
743	chr19	7418094	7418156	63	*	1.82791e-05	0.00115369	3.39948e-05	0.00111969	8.3083e-05	5.23066e-05	0.00198182	-0.00192951	FALSE	Promoter (<=1kb)	chr19	7417625	7425904	8280	+	108899	uc008gkz.2	531	ENSMUSG00000053080	2700081O15Rik	RIKEN cDNA 2700081O15 gene
744	chr19	7494772	7495032	261	*	1.64963e-06	3.15489e-05	0.00222348	-0.0021936	3.26968e-10	0.343304	0.00142535	0.342215	FALSE	Promoter (<=1kb)	chr19	7494438	7538609	44172	+	109168	uc008glg.2	594	ENSMUSG00000024759	Atl3	atlastin GTPase 3
745	chr19	8837494	8837583	90	*	2.11861e-05	0.00164797	4.06565e-05	0.00160731	4.1996e-10	0.00144542	0.339177	-0.33763	FALSE	Promoter (<=1kb)	chr19	8837467	8848683	11217	+	14705	uc008gni.2	116	ENSMUSG00000071657	Bscl2	Berardinelli-Seip congenital lipodystrophy 2 homolog (seipin)
746	chr19	11818692	11818767	76	*	2.58827e-05	3.65872e-05	0.00191686	-0.00188027	7.43394e-06	0.00672732	0.314053	-0.307326	TRUE	Promoter (<=1kb)	chr19	11775118	11819403	44286	-	20908	uc008gsy.1	636	ENSMUSG00000041488	Stx3	syntaxin 3
747	chr19	11818692	11818767	76	*	0.000994577	0.00128117	7.05965e-05	0.00121058	7.43394e-06	0.00672732	0.314053	-0.307326	FALSE	Promoter (<=1kb)	chr19	11775118	11819403	44286	-	20908	uc008gsy.1	636	ENSMUSG00000041488	Stx3	syntaxin 3
748	chr19	14598455	14598523	69	*	1.76786e-10	0.00268857	3.69079e-05	0.00265166	1.65831e-06	0.00532326	0.289281	-0.283958	FALSE	Promoter (<=1kb)	chr19	14448072	14598183	150112	-	21888	uc008gwk.2	-272	ENSMUSG00000024642	Tle4	transducin-like enhancer of split 4, homolog of Drosophila E(spl)
749	chr19	18671121	18671161	41	*	1.26981e-07	0.00707916	4.83027e-05	0.00703086	2.20203e-13	0.347274	0.00047244	0.346801	TRUE	Promoter (<=1kb)	chr19	18671329	18677883	6555	+	67383	uc008gxx.1	-208	ENSMUSG00000024726	Carnmt1	carnosine N-methyltransferase 1
750	chr19	21273056	21273128	73	*	1.33743e-05	0.00146802	4.70989e-05	0.00143034	9.05559e-07	0.321529	0.00682243	0.314653	TRUE	Promoter (<=1kb)	chr19	21272278	21286840	14563	+	22682	uc008gyw.2	850	ENSMUSG00000024750	Zfand5	zinc finger, AN1-type domain 5
751	chr19	23142456	23142486	31	*	0.000217615	0.00952459	0.350244	-0.34136	3.11772e-05	0.00396994	6.73889e-05	0.00390255	FALSE	Promoter (1-2kb)	chr19	23141226	23166911	25686	+	16601	uc008gzz.1	1260	ENSMUSG00000033863	Klf9	Kruppel-like factor 9
752	chr19	24030683	24030707	25	*	1.62202e-07	0.337681	0.00309709	0.334584	0.00237853	0.0232334	0.33939	-0.316156	FALSE	Promoter (<=1kb)	chr19	23972750	24031019	58270	-	381217	uc008hak.2	312	ENSMUSG00000071604	Fam189a2	family with sequence similarity 189, member A2
753	chr19	24030804	24030848	45	*	3.96094e-05	5.76486e-05	0.00415155	-0.0040939	0.00172672	0.000526075	4.80881e-05	0.000477987	FALSE	Promoter (<=1kb)	chr19	23972750	24031019	58270	-	381217	uc008hak.2	171	ENSMUSG00000071604	Fam189a2	family with sequence similarity 189, member A2
754	chr19	24030948	24031025	78	*	1.91128e-05	0.00124925	3.62896e-05	0.00121376	4.03144e-07	6.78227e-05	0.00381439	-0.00375461	FALSE	Promoter (<=1kb)	chr19	23972750	24031019	58270	-	381217	uc008hak.2	0	ENSMUSG00000071604	Fam189a2	family with sequence similarity 189, member A2
755	chr19	28010767	28010837	71	*	1.46142e-06	0.00137656	3.40788e-05	0.00134248	0.000106116	0.000331116	2.30942e-05	0.000308022	TRUE	Promoter (<=1kb)	chr19	27761721	28011166	249446	-	19726	uc008hcb.2	329	ENSMUSG00000040929	Rfx3	regulatory factor X, 3 (influences HLA class II expression)
756	chr19	28011371	28011453	83	*	1.16535e-06	0.0154428	5.69447e-05	0.0153406	3.88844e-06	0.00499155	9.45839e-05	0.00489697	TRUE	Promoter (<=1kb)	chr19	27761721	28011166	249446	-	19726	uc008hcb.2	-205	ENSMUSG00000040929	Rfx3	regulatory factor X, 3 (influences HLA class II expression)
757	chr19	28990692	28990795	104	*	0.000487055	0.000429358	0.0131588	-0.0127294	3.7315e-10	2.44964e-05	0.00482983	-0.00480533	TRUE	Promoter (<=1kb)	chr19	28990352	29008667	18316	+	67072	uc008hcs.2	443	ENSMUSG00000024780	Cdc37l1	cell division cycle 37-like 1
758	chr19	28990692	28990795	104	*	0.000214535	0.000863193	4.05633e-05	0.00082263	3.7315e-10	2.44964e-05	0.00482983	-0.00480533	FALSE	Promoter (<=1kb)	chr19	28990352	29008667	18316	+	67072	uc008hcs.2	443	ENSMUSG00000024780	Cdc37l1	cell division cycle 37-like 1
759	chr19	30030899	30030981	83	*	4.83783e-06	0.00339879	7.21864e-05	0.00328356	6.74338e-15	0.345113	0.000251727	0.344123	TRUE	Promoter (<=1kb)	chr19	30030513	30057396	26884	+	109113	uc008hef.1	468	ENSMUSG00000024817	Uhrf2	ubiquitin-like, containing PHD and RING finger domains 2
760	chr19	32756288	32756341	54	*	7.35531e-07	0.00877529	5.94603e-05	0.00873134	7.53233e-10	0.00157225	0.339799	-0.338227	FALSE	Promoter (1-2kb)	chr19	32757577	32802843	45267	+	19211	uc008hfq.1	-1289	ENSMUSG00000013663	Pten	phosphatase and tensin homolog
761	chr19	36554458	36554507	50	*	1.67939e-06	0.00176729	3.65722e-05	0.00173087	0.0010745	0.00158301	0.0605723	-0.0589611	FALSE	Promoter (<=1kb)	chr19	36554639	36591147	36509	+	226098	uc008hhm.2	-181	ENSMUSG00000041180	Hectd2	HECT domain containing 2
762	chr19	36554612	36554642	31	*	0.0109965	0.000935699	0.0187923	-0.0178566	6.83958e-07	0.00102918	2.3447e-05	0.00100573	FALSE	Promoter (<=1kb)	chr19	36554639	36591147	36509	+	226098	uc008hhm.2	0	ENSMUSG00000041180	Hectd2	HECT domain containing 2
763	chr19	44107445	44107604	160	*	4.11032e-08	0.00330105	4.23224e-05	0.00325873	6.37661e-10	0.342631	0.00154149	0.341303	TRUE	Promoter (<=1kb)	chr19	44073334	44107477	34144	-	12675	uc008hpg.2	0	ENSMUSG00000025199	Chuk	conserved helix-loop-helix ubiquitous kinase
764	chr19	44930921	44930956	36	*	1.67787e-07	0.374241	0.00356229	0.36822	2.37861e-08	0.00147353	0.412341	-0.410867	FALSE	Promoter (<=1kb)	chr19	44931119	44983787	52669	+	226151	uc008hqb.1	-198	ENSMUSG00000036097	Fam178a	family with sequence similarity 178, member A
765	chr19	45659754	45659860	107	*	7.27114e-12	0.00626957	3.71315e-05	0.00623128	9.76872e-06	0.000613917	2.33158e-05	0.000590601	TRUE	Promoter (<=1kb)	chr19	45578257	45660193	81937	-	30838	uc008hrf.1	333	ENSMUSG00000040913	Fbxw4	F-box and WD-40 domain protein 4
766	chr19	46044871	46045013	143	*	4.55652e-06	0.00208171	3.54618e-05	0.00204634	2.34284e-05	0.0377839	0.000485975	0.0374036	TRUE	Promoter (<=1kb)	chr19	46032601	46045211	12611	-	16825	uc012bmr.1	198	ENSMUSG00000025223	Ldb1	LIM domain binding 1
767	chr19	46045334	46045392	59	*	1.11438e-07	0.00319192	3.41647e-05	0.00315776	2.95991e-08	2.39576e-05	0.00214631	-0.00212236	FALSE	Promoter (<=1kb)	chr19	46032601	46045211	12611	-	16825	uc012bmr.1	-123	ENSMUSG00000025223	Ldb1	LIM domain binding 1
768	chr19	46500289	46500299	11	*	7.04684e-08	0.378568	0.00386721	0.374318	1.81663e-12	0.000613038	0.344111	-0.343498	FALSE	Promoter (1-2kb)	chr19	46501648	46516455	14808	+	93679	uc008hts.1	-1359	ENSMUSG00000025034	Trim8	tripartite motif-containing 8
769	chr19	47050577	47050748	172	*	0.000358981	3.1395e-05	0.000515047	-0.000483652	6.98329e-09	0.00550083	0.000139985	0.00536085	FALSE	Promoter (<=1kb)	chr19	47033619	47050845	17227	-	71041	uc008hul.1	97	ENSMUSG00000025050	Pcgf6	polycomb group ring finger 6
770	chr19	57360971	57361154	184	*	2.67338e-05	0.00289695	0.223371	-0.220474	2.38014e-07	2.44527e-05	0.00107849	-0.00105404	TRUE	Promoter (<=1kb)	chr19	57361009	57389594	28586	+	226252	uc008iac.2	0	ENSMUSG00000033478	Fam160b1	family with sequence similarity 160, member B1
771	chr19	57360971	57361154	184	*	6.03637e-14	0.38511	0.00048401	0.384649	2.38014e-07	2.44527e-05	0.00107849	-0.00105404	FALSE	Promoter (<=1kb)	chr19	57361009	57389594	28586	+	226252	uc008iac.2	0	ENSMUSG00000033478	Fam160b1	family with sequence similarity 160, member B1
772	chr19	57361260	57361422	163	*	5.74327e-08	0.379544	0.00324921	0.374649	4.39908e-10	0.000851953	0.305474	-0.304455	FALSE	Promoter (<=1kb)	chr19	57361009	57389594	28586	+	226252	uc008iac.2	413	ENSMUSG00000033478	Fam160b1	family with sequence similarity 160, member B1
773	chr19	60790434	60790477	44	*	0.000334011	0.000496357	3.44197e-05	0.000461937	0.000752135	4.48239e-05	0.000747744	-0.00070292	FALSE	Promoter (<=1kb)	chr19	60761116	60790693	29578	-	13669	uc008ibx.1	216	ENSMUSG00000024991	Eif3a	eukaryotic translation initiation factor 3, subunit A
774	chr2	5895073	5895119	47	*	7.50797e-05	0.0130285	0.000210874	0.0128177	9.41386e-12	0.328382	0.000608528	0.327774	TRUE	Promoter (<=1kb)	chr2	5881808	5895334	13527	-	57743	uc008ify.1	215	ENSMUSG00000025816	Sec61a2	Sec61, alpha subunit 2 (S. cerevisiae)
775	chr2	6323337	6323352	16	*	0.000205059	0.000476965	3.27546e-05	0.000444211	1.36432e-08	0.282003	0.00104507	0.280958	TRUE	Promoter (<=1kb)	chr2	6322757	6443820	121064	+	98910	uc008igk.1	595	ENSMUSG00000039046	Usp6nl	USP6 N-terminal like
776	chr2	6323504	6323504	1	*	0.00171841	3.47964e-05	0.00110178	-0.00106698	2.70702e-15	0.000237604	0.343928	-0.34369	TRUE	Promoter (<=1kb)	chr2	6322757	6443820	121064	+	98910	uc008igk.1	747	ENSMUSG00000039046	Usp6nl	USP6 N-terminal like
777	chr2	6872137	6872232	96	*	0.00104698	0.00117658	0.169166	-0.16799	4.3136e-06	0.329888	0.0110868	0.31865	FALSE	Intron (uc008igo.2/14007, intron 11 of 11)	chr2	6539699	6884996	345298	-	14007	uc008igo.2	12764	ENSMUSG00000002107	Celf2	CUGBP, Elav-like family member 2
778	chr2	10048118	10048193	76	*	1.21039e-09	0.383773	0.00188728	0.381892	0.0018609	0.000338443	0.00675114	-0.0064127	FALSE	Promoter (<=1kb)	chr2	9914552	10048609	134058	-	209361	uc008ihl.2	416	ENSMUSG00000025782	Taf3	TAF3 RNA polymerase II, TATA box binding protein (TBP)-associated factor
779	chr2	11777348	11777395	48	*	2.97318e-13	0.385286	0.000602232	0.384684	1.36477e-06	2.95241e-05	0.00220993	-0.0021804	FALSE	Promoter (<=1kb)	chr2	11747850	11777507	29658	-	50755	uc008ije.1	112	ENSMUSG00000058594	Fbxo18	F-box protein 18
780	chr2	11777348	11777395	48	*	4.51781e-05	3.17224e-05	0.00105277	-0.00102105	1.36477e-06	2.95241e-05	0.00220993	-0.0021804	TRUE	Promoter (<=1kb)	chr2	11747850	11777507	29658	-	50755	uc008ije.1	112	ENSMUSG00000058594	Fbxo18	F-box protein 18
781	chr2	11777503	11777503	1	*	4.68134e-05	0.00203917	5.40833e-05	0.00198508	0.000653156	0.000773667	0.0355336	-0.03476	FALSE	Promoter (<=1kb)	chr2	11747850	11777507	29658	-	50755	uc008ije.1	4	ENSMUSG00000058594	Fbxo18	F-box protein 18
782	chr2	18056840	18056848	9	*	5.03805e-06	0.00177648	3.57588e-05	0.00173097	1.79809e-10	0.344093	0.00129426	0.342799	TRUE	Promoter (1-2kb)	chr2	18057846	18057903	58	+	102466840	uc033hln.1	-1006	ENSMUSG00000099050	Mir7655	microRNA 7655
783	chr2	18064407	18064456	50	*	0.000159995	0.000681257	3.57952e-05	0.000643842	2.91886e-09	0.342924	0.00209909	0.340835	TRUE	Promoter (<=1kb)	chr2	18064585	18126229	61645	+	17354	uc008ilo.2	-178	ENSMUSG00000026743	Mllt10	myeloid/lymphoid or mixed-lineage leukemia (trithorax homolog, Drosophila); translocated to, 10
784	chr2	18064516	18064563	48	*	0.000159995	0.000681257	3.57952e-05	0.000643842	8.95821e-08	3.78089e-05	0.00805705	-0.00801925	FALSE	Promoter (<=1kb)	chr2	18064585	18126229	61645	+	17354	uc008ilo.2	-69	ENSMUSG00000026743	Mllt10	myeloid/lymphoid or mixed-lineage leukemia (trithorax homolog, Drosophila); translocated to, 10
785	chr2	18676548	18676548	1	*	0.00478115	0.0130587	0.226977	-0.213918	1.91287e-08	0.345752	0.00316903	0.342583	FALSE	Promoter (<=1kb)	chr2	18677018	18686629	9612	+	12151	uc008ily.1	-470	ENSMUSG00000026739	Bmi1	Bmi1 polycomb ring finger oncogene
786	chr2	26122555	26122602	48	*	1.2381e-05	3.03799e-05	0.0016323	-0.00160182	3.76559e-08	0.00286234	0.332407	-0.329682	TRUE	Promoter (<=1kb)	chr2	26055536	26122811	67276	-	67991	uc008iuc.1	209	ENSMUSG00000026932	Nacc2	nucleus accumbens associated 2, BEN and BTB (POZ) domain containing
787	chr2	26933494	26933496	3	*	2.30254e-05	0.00187217	3.63508e-05	0.00183582	4.75492e-10	0.329853	0.00119886	0.328654	TRUE	Promoter (<=1kb)	chr2	26920041	26933511	13471	-	20932	uc008iwl.2	15	ENSMUSG00000014867	Surf4	surfeit gene 4
788	chr2	26933504	26933520	17	*	2.30254e-05	0.00187217	3.63508e-05	0.00183582	0.000471083	7.67714e-05	0.0018428	-0.00176603	FALSE	Promoter (<=1kb)	chr2	26920041	26933511	13471	-	20932	uc008iwl.2	0	ENSMUSG00000014867	Surf4	surfeit gene 4
789	chr2	26933529	26933584	56	*	2.30254e-05	0.00187217	3.63508e-05	0.00183582	4.48761e-05	0.213415	0.00405228	0.209363	TRUE	Promoter (<=1kb)	chr2	26920041	26933511	13471	-	20932	uc008iwl.2	-18	ENSMUSG00000014867	Surf4	surfeit gene 4
790	chr2	27475394	27475610	217	*	1.26498e-05	0.000969199	3.15115e-05	0.000937688	1.07279e-09	0.332818	0.00169321	0.331293	TRUE	Promoter (<=1kb)	chr2	27445581	27475398	29818	-	67382	uc008ixm.2	0	ENSMUSG00000026918	Brd3	bromodomain containing 3
791	chr2	27475689	27475910	222	*	0.00171331	0.00522717	0.160876	-0.155648	4.99081e-08	2.97876e-05	0.0032622	-0.0032323	TRUE	Promoter (<=1kb)	chr2	27445581	27475673	30093	-	67382	uc008ixl.2	-16	ENSMUSG00000026918	Brd3	bromodomain containing 3
792	chr2	27475689	27475910	222	*	1.49986e-05	0.00121216	3.62497e-05	0.00117497	4.99081e-08	2.97876e-05	0.0032622	-0.0032323	FALSE	Promoter (<=1kb)	chr2	27445581	27475673	30093	-	67382	uc008ixl.2	-16	ENSMUSG00000026918	Brd3	bromodomain containing 3
793	chr2	27676933	27676936	4	*	3.5204e-05	3.06107e-05	0.00110774	-0.00107713	8.18582e-14	0.000431813	0.346923	-0.346491	TRUE	Promoter (<=1kb)	chr2	27677201	27763319	86119	+	20181	uc008ixs.1	-268	ENSMUSG00000015846	Rxra	retinoid X receptor alpha
794	chr2	27676994	27677005	12	*	0.000129879	0.000455139	3.04575e-05	0.000424542	0.000689682	0.0195712	0.000699108	0.0188721	TRUE	Promoter (<=1kb)	chr2	27677201	27763319	86119	+	20181	uc008ixs.1	-207	ENSMUSG00000015846	Rxra	retinoid X receptor alpha
795	chr2	28205588	28205736	149	*	2.30522e-05	4.40654e-05	0.00281879	-0.00277207	1.45244e-11	0.344879	0.000858015	0.344175	FALSE	Promoter (<=1kb)	chr2	28205689	28214431	8743	+	56177	uc008iyc.1	0	ENSMUSG00000026833	Olfm1	olfactomedin 1
796	chr2	29802705	29802857	153	*	1.30452e-06	3.5748e-05	0.00495534	-0.00491959	4.50643e-05	0.00271859	7.54075e-05	0.00264318	FALSE	Promoter (<=1kb)	chr2	29802680	29817522	14843	+	26569	uc008jaf.1	177	ENSMUSG00000059316	Slc27a4	solute carrier family 27 (fatty acid transporter), member 4
797	chr2	30416157	30416235	79	*	2.37251e-06	0.377207	0.00667336	0.371656	3.76589e-10	0.340255	0.0013377	0.339371	TRUE	Promoter (<=1kb)	chr2	30416050	30447807	31758	+	110854	uc008jcn.2	185	ENSMUSG00000039515	Ppp2r4	protein phosphatase 2A activator, regulatory subunit B
798	chr2	30711913	30712050	138	*	0.000849725	0.00121119	6.62182e-05	0.00114498	2.28181e-05	0.000574214	2.39461e-05	0.000550268	TRUE	Distal Intergenic	chr2	30721210	30721293	84	+	100526499	uc012btn.1	-9297	ENSMUSG00000093091	Mir3089	microRNA 3089
799	chr2	30712196	30712263	68	*	0.000183221	3.11078e-05	0.000674305	-0.000642711	0.000181923	2.32554e-05	0.000281259	-0.000258003	TRUE	Distal Intergenic	chr2	30721210	30721293	84	+	100526499	uc012btn.1	-9014	ENSMUSG00000093091	Mir3089	microRNA 3089
800	chr2	30982157	30982266	110	*	7.3546e-05	3.25166e-05	0.000970177	-0.000937155	1.50543e-05	0.0038663	6.05937e-05	0.00380571	FALSE	Promoter (<=1kb)	chr2	30982279	31022655	40377	+	74270	uc008jde.2	-122	ENSMUSG00000026854	Usp20	ubiquitin specific peptidase 20
801	chr2	31470198	31470228	31	*	9.33014e-09	0.00731225	4.49109e-05	0.00726709	3.19894e-08	2.85748e-05	0.00450578	-0.00447722	FALSE	Promoter (<=1kb)	chr2	31470270	31520670	50401	+	11898	uc008jdu.1	-72	ENSMUSG00000076441	Ass1	argininosuccinate synthetase 1
802	chr2	32451461	32451500	40	*	3.16599e-13	0.38525	0.00059368	0.384657	5.99539e-09	0.00446292	2.65261e-05	0.00443732	TRUE	Promoter (<=1kb)	chr2	32414487	32451470	36984	-	227731	uc008jfp.2	0	ENSMUSG00000026819	Slc25a25	solute carrier family 25 (mitochondrial carrier, phosphate carrier), member 25
803	chr2	32535779	32535784	6	*	3.44031e-10	0.381351	0.0014495	0.379742	0.000320929	0.00200566	8.83213e-05	0.00191734	TRUE	Promoter (<=1kb)	chr2	32535359	32569750	34392	+	98952	uc008jfs.1	425	ENSMUSG00000039157	Fam102a	family with sequence similarity 102, member A
804	chr2	32535785	32535789	5	*	3.44031e-10	0.381351	0.0014495	0.379742	2.96015e-11	0.000918409	0.344624	-0.343706	FALSE	Promoter (<=1kb)	chr2	32535359	32569750	34392	+	98952	uc008jfs.1	430	ENSMUSG00000039157	Fam102a	family with sequence similarity 102, member A
805	chr2	32535790	32535815	26	*	3.44031e-10	0.381351	0.0014495	0.379742	4.73625e-06	0.000883375	2.4703e-05	0.000858672	TRUE	Promoter (<=1kb)	chr2	32535359	32569750	34392	+	98952	uc008jfs.1	456	ENSMUSG00000039157	Fam102a	family with sequence similarity 102, member A
806	chr2	32712500	32712566	67	*	0.00014945	3.01883e-05	0.000676521	-0.000646333	7.58477e-09	0.00178609	0.326216	-0.324348	TRUE	Promoter (<=1kb)	chr2	32705782	32712784	7003	-	107951	uc008jgo.2	218	ENSMUSG00000009555	Cdk9	cyclin-dependent kinase 9 (CDC2-related kinase)
807	chr2	33468198	33468230	33	*	1.68254e-11	0.383861	0.00134074	0.382464	4.46598e-09	0.00208733	0.341759	-0.339672	FALSE	Promoter (<=1kb)	chr2	33450288	33468532	18245	-	71834	uc008jhv.1	302	ENSMUSG00000026788	Zbtb43	zinc finger and BTB domain containing 43
808	chr2	34372663	34372676	14	*	0.000833402	4.95232e-05	0.00221978	-0.00218913	1.1472e-06	3.22789e-05	0.00324821	-0.00321593	TRUE	Promoter (<=1kb)	chr2	34171457	34372045	200589	-	18516	uc008jih.2	-618	ENSMUSG00000038718	Pbx3	pre B cell leukemia homeobox 3
809	chr2	34372680	34372729	50	*	0.000833402	4.95232e-05	0.00221978	-0.00218913	1.79639e-06	0.336794	0.00599364	0.329955	FALSE	Promoter (<=1kb)	chr2	34171457	34372045	200589	-	18516	uc008jih.2	-635	ENSMUSG00000038718	Pbx3	pre B cell leukemia homeobox 3
810	chr2	34406975	34406990	16	*	7.45374e-05	0.00609352	0.000122006	0.00597151	1.43094e-06	5.70387e-05	0.00674151	-0.00668447	FALSE	Promoter (<=1kb)	chr2	34406851	34624958	218108	+	227743	uc008jim.2	139	ENSMUSG00000038696	Mapkap1	mitogen-activated protein kinase associated protein 1
811	chr2	35200379	35200438	60	*	2.87392e-09	0.380569	0.00191634	0.378364	0.000178043	0.0302277	0.00190766	0.0283061	TRUE	Promoter (<=1kb)	chr2	35180205	35201120	20916	-	68365	uc008jjz.1	682	ENSMUSG00000026878	Rab14	RAB14, member RAS oncogene family
812	chr2	35200494	35200540	47	*	2.87392e-09	0.380569	0.00191634	0.378364	2.62154e-11	0.000843711	0.342965	-0.342121	FALSE	Promoter (<=1kb)	chr2	35180205	35201120	20916	-	68365	uc008jjz.1	580	ENSMUSG00000026878	Rab14	RAB14, member RAS oncogene family
813	chr2	35200892	35200989	98	*	3.63165e-11	0.384528	0.00148236	0.383045	6.25078e-11	0.00215903	3.1816e-05	0.00212841	TRUE	Promoter (<=1kb)	chr2	35180205	35201120	20916	-	68365	uc008jjz.1	131	ENSMUSG00000026878	Rab14	RAB14, member RAS oncogene family
814	chr2	35256669	35256679	11	*	9.20204e-06	3.96721e-05	0.00347971	-0.00344004	0.000708112	0.00279731	0.0350356	-0.0322383	TRUE	Promoter (<=1kb)	chr2	35256359	35307902	51544	+	227753	uc008jkc.2	320	ENSMUSG00000026879	Gsn	gelsolin
815	chr2	38643922	38643992	71	*	2.51391e-06	0.00364394	3.63691e-05	0.00360757	3.51444e-08	0.00255696	0.333998	-0.33009	FALSE	Promoter (<=1kb)	chr2	38588046	38643906	55861	-	19177	uc008jnp.1	-16	ENSMUSG00000026750	Psmb7	proteasome (prosome, macropain) subunit, beta type 7
816	chr2	39225864	39225910	47	*	5.93897e-05	0.000990496	3.70316e-05	0.00095354	1.3599e-05	0.258609	0.00452908	0.25408	TRUE	Promoter (<=1kb)	chr2	39196798	39226338	29541	-	67857	uc008joi.1	428	ENSMUSG00000026753	Ppp6c	protein phosphatase 6, catalytic subunit
817	chr2	57115963	57115978	16	*	0.000113096	9.6443e-05	0.00531204	-0.00521542	0.000330981	0.00461224	0.000176925	0.00443531	FALSE	Promoter (<=1kb)	chr2	57107226	57115038	7813	-	18227	uc008jrw.2	-925	ENSMUSG00000026826	Nr4a2	nuclear receptor subfamily 4, group A, member 2
818	chr2	58566770	58566773	4	*	5.60524e-08	0.373019	0.00273561	0.370284	1.29995e-05	0.00725836	0.324707	-0.317448	FALSE	Promoter (<=1kb)	chr2	58446438	58566828	120391	-	11477	uc008jss.1	55	ENSMUSG00000026836	Acvr1	activin A receptor, type 1
819	chr2	58566798	58566798	1	*	5.60524e-08	0.373019	0.00273561	0.370284	0.00384662	0.0353415	0.0013273	0.0340142	TRUE	Promoter (<=1kb)	chr2	58446438	58566828	120391	-	11477	uc008jss.1	30	ENSMUSG00000026836	Acvr1	activin A receptor, type 1
820	chr2	58566888	58566968	81	*	1.71113e-05	0.00471801	0.309052	-0.304334	6.9581e-06	2.35304e-05	0.000832845	-0.000809315	TRUE	Promoter (<=1kb)	chr2	58446438	58566828	120391	-	11477	uc008jss.1	-60	ENSMUSG00000026836	Acvr1	activin A receptor, type 1
821	chr2	60209429	60209429	1	*	4.87801e-07	0.00361043	4.5258e-05	0.00356517	0.00527897	0.000947519	0.0158399	-0.0148924	FALSE	Promoter (<=1kb)	chr2	60209936	60248385	38450	+	57438	uc008jtx.1	-507	ENSMUSG00000026977	March7	membrane-associated ring finger (C3HC4) 7
822	chr2	60209631	60209713	83	*	1.09322e-05	3.00419e-05	0.000515695	-0.000485653	2.98877e-05	2.31771e-05	0.00047159	-0.000448413	TRUE	Promoter (<=1kb)	chr2	60209936	60248385	38450	+	57438	uc008jtx.1	-305	ENSMUSG00000026977	March7	membrane-associated ring finger (C3HC4) 7
823	chr2	60210106	60210233	128	*	6.72557e-05	3.68173e-05	0.00221924	-0.00218242	1.6765e-05	0.00464947	9.52792e-05	0.00455075	FALSE	Promoter (<=1kb)	chr2	60209936	60248385	38450	+	57438	uc008jtx.1	297	ENSMUSG00000026977	March7	membrane-associated ring finger (C3HC4) 7
824	chr2	60210106	60210233	128	*	0.00144633	0.00110876	5.25558e-05	0.00104539	1.6765e-05	0.00464947	9.52792e-05	0.00455075	TRUE	Promoter (<=1kb)	chr2	60209936	60248385	38450	+	57438	uc008jtx.1	297	ENSMUSG00000026977	March7	membrane-associated ring finger (C3HC4) 7
825	chr2	60210262	60210336	75	*	0.00144633	0.00110876	5.25558e-05	0.00104539	1.17564e-12	0.000540509	0.342531	-0.34199	FALSE	Promoter (<=1kb)	chr2	60209936	60248385	38450	+	57438	uc008jtx.1	400	ENSMUSG00000026977	March7	membrane-associated ring finger (C3HC4) 7
826	chr2	61711905	61711942	38	*	1.96299e-06	0.00195493	4.30541e-05	0.00191165	3.73153e-11	0.00744279	4.6798e-05	0.00739599	TRUE	Promoter (<=1kb)	chr2	61711694	61800376	88683	+	59029	uc008jvc.1	248	ENSMUSG00000026914	Psmd14	proteasome (prosome, macropain) 26S subunit, non-ATPase, 14
827	chr2	66124418	66124441	24	*	1.05606e-06	4.45124e-05	0.00295643	-0.00291192	0.00104315	0.00234722	0.000132104	0.00221512	FALSE	Promoter (<=1kb)	chr2	66082766	66124793	42028	-	14425	uc008jwu.2	352	ENSMUSG00000026994	Galnt3	UDP-N-acetyl-alpha-D-galactosamine:polypeptide N-acetylgalactosaminyltransferase 3
828	chr2	68470980	68470985	6	*	0.00130424	6.54245e-05	0.00327434	-0.00320892	0.000252111	0.0085955	0.239395	-0.230799	TRUE	Promoter (<=1kb)	chr2	68210447	68471981	261535	-	53416	uc008jxo.1	996	ENSMUSG00000027030	Stk39	serine/threonine kinase 39
829	chr2	69205719	69205792	74	*	2.94557e-06	0.00882264	8.89419e-05	0.0087337	7.62421e-05	0.00787893	0.273516	-0.265638	FALSE	Promoter (<=1kb)	chr2	69193895	69206213	12319	-	66442	uc008jxu.3	421	ENSMUSG00000005233	Spc25	SPC25, NDC80 kinetochore complex component, homolog (S. cerevisiae)
830	chr2	72980100	72980100	1	*	9.62419e-11	0.026991	6.62813e-05	0.0269242	1.75381e-10	0.00134554	0.342328	-0.340982	FALSE	Promoter (<=1kb)	chr2	72936432	72980446	44015	-	20687	uc008kcc.2	346	ENSMUSG00000027109	Sp3	trans-acting transcription factor 3
831	chr2	72980341	72980373	33	*	7.85768e-05	0.000885832	3.73613e-05	0.00084847	5.87859e-07	6.55706e-05	0.00375046	-0.00355374	FALSE	Promoter (<=1kb)	chr2	72936432	72980446	44015	-	20687	uc008kcc.2	73	ENSMUSG00000027109	Sp3	trans-acting transcription factor 3
832	chr2	72980586	72980611	26	*	9.29478e-07	0.00345818	4.66844e-05	0.00341149	0.000345153	0.0164854	0.322476	-0.305991	FALSE	Promoter (<=1kb)	chr2	72936432	72980446	44015	-	20687	uc008kcc.2	-140	ENSMUSG00000027109	Sp3	trans-acting transcription factor 3
833	chr2	72980652	72980662	11	*	0.000132398	0.00247435	0.161151	-0.158677	0.000661319	0.019273	0.325979	-0.306713	TRUE	Promoter (<=1kb)	chr2	72936432	72980446	44015	-	20687	uc008kcc.2	-206	ENSMUSG00000027109	Sp3	trans-acting transcription factor 3
834	chr2	73214391	73214431	41	*	3.06579e-05	0.0160985	0.000224823	0.015878	1.65311e-05	0.364342	0.00452068	0.359821	TRUE	Promoter (<=1kb)	chr2	73092801	73214447	121647	-	67059	uc008kcg.1	16	ENSMUSG00000027108	Ola1	Obg-like ATPase 1
835	chr2	77280534	77280571	38	*	1.72448e-05	3.06471e-05	0.00137609	-0.00134544	1.32624e-08	0.00219824	0.314768	-0.312569	TRUE	Promoter (<=1kb)	chr2	77180340	77280592	100253	-	228071	uc008kfx.3	21	ENSMUSG00000042272	Sestd1	SEC14 and spectrin domains 1
836	chr2	78869016	78869155	140	*	2.86773e-07	0.380426	0.00480012	0.374964	2.16395e-12	0.00072353	0.346193	-0.345351	FALSE	Promoter (<=1kb)	chr2	78869047	78914551	45505	+	22193	uc008kgm.1	0	ENSMUSG00000027011	Ube2e3	ubiquitin-conjugating enzyme E2E 3
837	chr2	78869208	78869208	1	*	2.86773e-07	0.380426	0.00480012	0.374964	9.61784e-08	0.00159657	2.36759e-05	0.0015729	TRUE	Promoter (<=1kb)	chr2	78869047	78914551	45505	+	22193	uc008kgm.1	161	ENSMUSG00000027011	Ube2e3	ubiquitin-conjugating enzyme E2E 3
838	chr2	80315691	80315733	43	*	6.24806e-06	0.00144118	3.19577e-05	0.00140943	4.95746e-08	0.343104	0.00355718	0.339511	TRUE	Promoter (<=1kb)	chr2	80315466	80324788	9323	+	66861	uc008khi.1	267	ENSMUSG00000027006	Dnajc10	DnaJ (Hsp40) homolog, subfamily C, member 10
839	chr2	83644377	83644382	6	*	3.07933e-05	3.44558e-05	0.00179583	-0.00176142	2.90196e-05	0.00197578	0.145318	-0.143342	TRUE	Promoter (<=1kb)	chr2	83644578	83658302	13725	+	69082	uc008khx.1	-201	ENSMUSG00000027091	Zc3h15	zinc finger CCCH-type containing 15
840	chr2	83644696	83644696	1	*	0.00177888	0.000874913	5.90095e-05	0.000815904	4.61011e-06	0.00537387	0.299742	-0.294368	FALSE	Promoter (<=1kb)	chr2	83644578	83658302	13725	+	69082	uc008khx.1	118	ENSMUSG00000027091	Zc3h15	zinc finger CCCH-type containing 15
841	chr2	83644724	83644724	1	*	0.00177888	0.000874913	5.90095e-05	0.000815904	2.15451e-07	0.00270234	3.01459e-05	0.00267219	TRUE	Promoter (<=1kb)	chr2	83644578	83658302	13725	+	69082	uc008khx.1	146	ENSMUSG00000027091	Zc3h15	zinc finger CCCH-type containing 15
842	chr2	83644725	83644732	8	*	0.00177888	0.000874913	5.90095e-05	0.000815904	1.22112e-08	0.00246343	0.339456	-0.336992	FALSE	Promoter (<=1kb)	chr2	83644578	83658302	13725	+	69082	uc008khx.1	154	ENSMUSG00000027091	Zc3h15	zinc finger CCCH-type containing 15
843	chr2	83644749	83644915	167	*	0.00177888	0.000874913	5.90095e-05	0.000815904	7.81139e-07	0.00179737	2.46151e-05	0.00177275	TRUE	Promoter (<=1kb)	chr2	83644578	83658302	13725	+	69082	uc008khx.1	337	ENSMUSG00000027091	Zc3h15	zinc finger CCCH-type containing 15
844	chr2	84743895	84743930	36	*	1.19185e-05	4.25249e-05	0.00368239	-0.00363986	2.19993e-07	0.00386513	4.27861e-05	0.00382278	FALSE	Promoter (2-3kb)	chr2	84741115	84741178	64	-	387149	uc012bym.1	-2717	ENSMUSG00000065484	Mir130a	microRNA 130a
845	chr2	91070128	91070198	71	*	5.81701e-05	3.09559e-05	0.000964376	-0.00093342	2.6892e-05	2.62492e-05	0.000799421	-0.000772649	TRUE	Promoter (<=1kb)	chr2	91061781	91070315	8535	-	68427	uc008kug.2	117	ENSMUSG00000002105	Slc39a13	solute carrier family 39 (metal ion transporter), member 13
846	chr2	91256770	91256770	1	*	0.000136508	2.98892e-05	0.000616823	-0.000586934	0.00485246	9.54511e-05	2.29752e-05	7.24759e-05	FALSE	Promoter (<=1kb)	chr2	91256813	91264680	7868	+	80708	uc008kvn.3	-43	ENSMUSG00000027257	Pacsin3	protein kinase C and casein kinase substrate in neurons 3
847	chr2	103073592	103073613	22	*	1.03458e-05	0.00238611	5.39121e-05	0.0023322	4.62302e-10	0.330292	0.00146293	0.328829	TRUE	Promoter (<=1kb)	chr2	103021057	103073513	52457	-	27402	uc008lil.3	-79	ENSMUSG00000010914	Pdhx	pyruvate dehydrogenase complex, component X
848	chr2	104493891	104493898	8	*	3.24348e-13	3.06861e-05	0.00627608	-0.00624539	0.000155748	0.273742	0.0110028	0.262739	FALSE	Promoter (<=1kb)	chr2	104426482	104494489	68008	-	15259	uc008lju.2	591	ENSMUSG00000027177	Hipk3	homeodomain interacting protein kinase 3
849	chr2	104493906	104493908	3	*	3.24348e-13	3.06861e-05	0.00627608	-0.00624539	0.00503149	0.00119018	0.0194027	-0.0182125	TRUE	Promoter (<=1kb)	chr2	104426482	104494489	68008	-	15259	uc008lju.2	581	ENSMUSG00000027177	Hipk3	homeodomain interacting protein kinase 3
850	chr2	104493914	104493986	73	*	3.24348e-13	3.06861e-05	0.00627608	-0.00624539	6.38342e-07	0.330475	0.00542933	0.325046	FALSE	Promoter (<=1kb)	chr2	104426482	104494489	68008	-	15259	uc008lju.2	503	ENSMUSG00000027177	Hipk3	homeodomain interacting protein kinase 3
851	chr2	104711679	104711679	1	*	2.45643e-05	8.44723e-05	0.00774453	-0.00766006	1.54428e-13	0.348345	0.000513615	0.347832	FALSE	Promoter (<=1kb)	chr2	104679980	104712162	32183	-	320554	uc008lkb.1	483	ENSMUSG00000027175	Tcp11l1	t-complex 11 like 1
852	chr2	104711969	104712016	48	*	6.41006e-08	0.00296705	3.18845e-05	0.00293516	8.19605e-06	0.0269443	0.000235447	0.0267089	TRUE	Promoter (<=1kb)	chr2	104679980	104712162	32183	-	320554	uc008lkb.1	146	ENSMUSG00000027175	Tcp11l1	t-complex 11 like 1
853	chr2	104712324	104712330	7	*	0.000128089	0.00255548	7.11976e-05	0.00248428	2.23449e-09	0.00159534	0.336955	-0.335359	FALSE	Promoter (<=1kb)	chr2	104679980	104712162	32183	-	320554	uc008lkb.1	-162	ENSMUSG00000027175	Tcp11l1	t-complex 11 like 1
854	chr2	117249726	117249763	38	*	2.62784e-05	4.88255e-05	0.00401116	-0.00395755	1.4453e-05	0.00408608	8.6508e-05	0.00399957	FALSE	Promoter (<=1kb)	chr2	117249739	117271540	21802	+	68215	uc008lrk.1	0	ENSMUSG00000027349	Fam98b	family with sequence similarity 98, member B
855	chr2	118926474	118926476	3	*	4.68852e-12	0.383527	0.000859747	0.382668	0.000354627	0.0289426	0.00060263	0.02834	TRUE	Promoter (<=1kb)	chr2	118926497	118928583	2087	+	72136	uc012cbn.1	-23	ENSMUSG00000074916	Chst14	carbohydrate (N-acetylgalactosamine 4-0) sulfotransferase 14
856	chr2	120352785	120352825	41	*	6.79229e-07	0.00773944	6.28794e-05	0.00767656	2.88878e-08	0.318837	0.00254729	0.31629	TRUE	Promoter (<=1kb)	chr2	120316461	120353133	36673	-	269338	uc008lvj.2	308	ENSMUSG00000027291	Vps39	vacuolar protein sorting 39 (yeast)
857	chr2	122118068	122118068	1	*	5.14999e-08	0.368215	0.00311153	0.365103	0.00495075	0.0175852	0.224055	-0.20647	FALSE	Promoter (<=1kb)	chr2	122053526	122118386	64861	-	214585	uc008mac.2	318	ENSMUSG00000033396	Spg11	spastic paraplegia 11
858	chr2	122118402	122118507	106	*	1.79025e-13	0.385257	0.000544066	0.384711	6.24685e-08	0.000207507	0.0473662	-0.0472226	FALSE	Promoter (<=1kb)	chr2	122053526	122118386	64861	-	214585	uc008mac.2	-16	ENSMUSG00000033396	Spg11	spastic paraplegia 11
859	chr2	122118402	122118507	106	*	4.03278e-06	2.95875e-05	0.00161492	-0.00158533	6.24685e-08	0.000207507	0.0473662	-0.0472226	TRUE	Promoter (<=1kb)	chr2	122053526	122118386	64861	-	214585	uc008mac.2	-16	ENSMUSG00000033396	Spg11	spastic paraplegia 11
860	chr2	122348874	122348962	89	*	1.56272e-06	4.75189e-05	0.00361458	-0.00356692	2.27291e-09	0.328302	0.00156287	0.32674	FALSE	3' UTR	chr2	122348892	122354131	5240	-	435684	uc056zoy.1	5169	ENSMUSG00000033256	Shf	Src homology 2 domain containing F
861	chr2	125505565	125505678	114	*	2.25035e-05	0.00156541	4.03738e-05	0.00152565	4.97233e-09	0.342196	0.00263783	0.339563	TRUE	Promoter (<=1kb)	chr2	125300594	125506438	205845	-	14118	uc008mco.1	760	ENSMUSG00000027204	Fbn1	fibrillin 1
862	chr2	125506233	125506233	1	*	9.48505e-08	3.92837e-05	0.00514904	-0.00510976	8.44957e-06	0.000144732	0.0132923	-0.0131476	TRUE	Promoter (<=1kb)	chr2	125300594	125506438	205845	-	14118	uc008mco.1	205	ENSMUSG00000027204	Fbn1	fibrillin 1
863	chr2	126707418	126707462	45	*	6.11858e-08	3.21276e-05	0.00399039	-0.00395826	8.3699e-06	0.00484721	0.250062	-0.245215	TRUE	Promoter (<=1kb)	chr2	126707328	126733334	26007	+	84092	uc008mea.2	134	ENSMUSG00000027363	Usp8	ubiquitin specific peptidase 8
864	chr2	129199201	129199236	36	*	4.28202e-06	0.00233409	3.70626e-05	0.00229703	4.3613e-06	6.4689e-05	0.0044097	-0.00434501	FALSE	Promoter (<=1kb)	chr2	129199310	129211612	12303	+	20515	uc008mhm.2	-109	ENSMUSG00000027397	Slc20a1	solute carrier family 20, member 1
865	chr2	129800678	129800752	75	*	3.46143e-08	0.00358899	2.9656e-05	0.00355933	2.41779e-06	7.45303e-05	0.00415197	-0.00407744	FALSE	Promoter (<=1kb)	chr2	129800517	129832285	31769	+	67333	uc008mie.2	235	ENSMUSG00000037885	Stk35	serine/threonine kinase 35
866	chr2	129801555	129801569	15	*	6.91428e-10	0.381927	0.00213756	0.379778	0.000766851	0.000192178	0.0048169	-0.00462472	FALSE	Promoter (<=1kb)	chr2	129798369	129801459	3091	-	654409	uc012cdx.1	-96	#N/A	4932416H05Rik	RIKEN cDNA 4932416H05 gene
867	chr2	130697722	130697767	46	*	5.06235e-11	0.38424	0.00116369	0.383077	2.65521e-11	0.000771824	0.330879	-0.330107	FALSE	Promoter (<=1kb)	chr2	130684108	130697519	13412	-	269356	uc008mjv.1	-203	ENSMUSG00000074796	Slc4a11	solute carrier family 4, sodium bicarbonate transporter-like, member 11
868	chr2	131179761	131179790	30	*	0.00113774	4.00615e-05	0.000797937	-0.000757876	4.65754e-05	0.225663	0.00525454	0.220408	FALSE	Promoter (<=1kb)	chr2	131177289	131180012	2724	-	12616	uc008mkx.1	222	ENSMUSG00000068267	Cenpb	centromere protein B
869	chr2	131180084	131180084	1	*	0.000755995	2.98111e-05	0.000352959	-0.000323148	7.98678e-08	0.00131165	2.39755e-05	0.00128768	FALSE	Promoter (<=1kb)	chr2	131177289	131180012	2724	-	12616	uc008mkx.1	-72	ENSMUSG00000068267	Cenpb	centromere protein B
870	chr2	131180086	131180090	5	*	0.000755995	2.98111e-05	0.000352959	-0.000323148	1.23837e-10	0.00138985	0.345598	-0.344208	TRUE	Promoter (<=1kb)	chr2	131177289	131180012	2724	-	12616	uc008mkx.1	-74	ENSMUSG00000068267	Cenpb	centromere protein B
871	chr2	131180098	131180098	1	*	0.000755995	2.98111e-05	0.000352959	-0.000323148	5.43655e-08	0.00164525	2.48607e-05	0.00162039	FALSE	Promoter (<=1kb)	chr2	131177289	131180012	2724	-	12616	uc008mkx.1	-86	ENSMUSG00000068267	Cenpb	centromere protein B
872	chr2	131186785	131186795	11	*	1.31081e-05	3.39841e-05	0.00222886	-0.00219488	3.08068e-07	0.00454534	4.46779e-05	0.00450066	FALSE	Promoter (<=1kb)	chr2	131186948	131198511	11564	+	12531	uc008mky.3	-163	ENSMUSG00000027330	Cdc25b	cell division cycle 25B
873	chr2	131352668	131352685	18	*	6.40187e-10	0.00474107	3.33379e-05	0.0047088	1.88887e-12	0.347583	0.000732853	0.34685	TRUE	Promoter (<=1kb)	chr2	131298488	131352892	54405	-	51902	uc008mll.2	207	ENSMUSG00000048911	Rnf24	ring finger protein 24
874	chr2	131352700	131352708	9	*	6.40187e-10	0.00474107	3.33379e-05	0.0047088	2.75054e-06	0.00576235	0.326646	-0.320889	FALSE	Promoter (<=1kb)	chr2	131298488	131352892	54405	-	51902	uc008mll.2	184	ENSMUSG00000048911	Rnf24	ring finger protein 24
875	chr2	131352857	131352863	7	*	6.40187e-10	0.00474107	3.33379e-05	0.0047088	0.000283261	0.276861	0.0165924	0.260268	TRUE	Promoter (<=1kb)	chr2	131298488	131352892	54405	-	51902	uc008mll.2	29	ENSMUSG00000048911	Rnf24	ring finger protein 24
876	chr2	132263394	132263558	165	*	0.0003446	2.97262e-05	0.000413535	-0.000383808	0.000109512	0.0115944	0.000375579	0.0112188	FALSE	Promoter (<=1kb)	chr2	132263148	132296190	33043	+	110911	uc008mmn.2	410	ENSMUSG00000058793	Cds2	CDP-diacylglycerol synthase (phosphatidate cytidylyltransferase) 2
877	chr2	132263394	132263558	165	*	1.56835e-05	0.00345436	6.76821e-05	0.00338668	0.000109512	0.0115944	0.000375579	0.0112188	TRUE	Promoter (<=1kb)	chr2	132263148	132296190	33043	+	110911	uc008mmn.2	410	ENSMUSG00000058793	Cds2	CDP-diacylglycerol synthase (phosphatidate cytidylyltransferase) 2
878	chr2	132263394	132263558	165	*	0.00132417	0.00400857	0.161706	-0.157698	0.000109512	0.0115944	0.000375579	0.0112188	FALSE	Promoter (<=1kb)	chr2	132263148	132296190	33043	+	110911	uc008mmn.2	410	ENSMUSG00000058793	Cds2	CDP-diacylglycerol synthase (phosphatidate cytidylyltransferase) 2
879	chr2	132846839	132846841	3	*	3.53939e-05	0.000878395	3.22365e-05	0.00084594	0.000990754	0.000171023	0.00597074	-0.00579972	FALSE	Promoter (<=1kb)	chr2	132846666	132866768	20103	+	66586	uc008mnk.1	175	ENSMUSG00000027357	Crls1	cardiolipin synthase 1
880	chr2	132846900	132846975	76	*	3.53939e-05	0.000878395	3.22365e-05	0.00084594	3.52721e-08	0.345209	0.0033965	0.342305	TRUE	Promoter (<=1kb)	chr2	132846666	132866768	20103	+	66586	uc008mnk.1	309	ENSMUSG00000027357	Crls1	cardiolipin synthase 1
881	chr2	151494277	151494320	44	*	1.5087e-05	3.91045e-05	0.00292392	-0.00288482	1.38179e-08	0.00333816	2.50994e-05	0.00331306	FALSE	Promoter (<=1kb)	chr2	151494182	151511310	17129	+	386649	uc033hqq.2	138	ENSMUSG00000027455	Nsfl1c	NSFL1 (p97) cofactor (p47)
882	chr2	151494277	151494320	44	*	6.40502e-10	0.38377	0.00168466	0.382085	1.38179e-08	0.00333816	2.50994e-05	0.00331306	TRUE	Promoter (<=1kb)	chr2	151494182	151511310	17129	+	386649	uc033hqq.2	138	ENSMUSG00000027455	Nsfl1c	NSFL1 (p97) cofactor (p47)
883	chr2	151494277	151494320	44	*	2.23665e-05	3.13681e-05	0.00152082	-0.00148945	1.38179e-08	0.00333816	2.50994e-05	0.00331306	FALSE	Promoter (<=1kb)	chr2	151494182	151511310	17129	+	386649	uc033hqq.2	138	ENSMUSG00000027455	Nsfl1c	NSFL1 (p97) cofactor (p47)
884	chr2	152105750	152105812	63	*	5.93466e-07	3.72261e-05	0.00291871	-0.00287993	1.77963e-10	0.00105836	0.327471	-0.326413	TRUE	Promoter (<=1kb)	chr2	152105524	152111376	5853	+	76650	uc008new.2	288	ENSMUSG00000032802	Srxn1	sulfiredoxin 1 homolog (S. cerevisiae)
885	chr2	152105851	152105876	26	*	5.93466e-07	3.72261e-05	0.00291871	-0.00287993	0.000963394	0.000690196	4.88544e-05	0.000641342	FALSE	Promoter (<=1kb)	chr2	152105524	152111376	5853	+	76650	uc008new.2	352	ENSMUSG00000032802	Srxn1	sulfiredoxin 1 homolog (S. cerevisiae)
886	chr2	152397371	152397393	23	*	0.000851054	0.00427087	0.000149528	0.0040565	5.92404e-05	0.000160403	0.00799164	-0.00783124	FALSE	Promoter (<=1kb)	chr2	152393612	152398046	4435	-	20667	uc008nfi.1	653	ENSMUSG00000051817	Sox12	SRY (sex determining region Y)-box 12
887	chr2	153015166	153015224	59	*	4.79287e-12	0.383967	0.00079383	0.383174	1.37957e-09	0.00183468	0.340357	-0.338522	FALSE	Promoter (<=1kb)	chr2	153008890	153015383	6494	-	68559	uc008ngz.1	159	ENSMUSG00000027472	Pdrg1	p53 and DNA damage regulated 1
888	chr2	153530035	153530035	1	*	1.59974e-07	3.09527e-05	0.00207102	-0.00203508	1.76887e-09	0.33769	0.00186271	0.335827	FALSE	Promoter (<=1kb)	chr2	153407461	153529971	122511	-	329540	uc008nhv.2	-64	ENSMUSG00000061411	Nol4l	nucleolar protein 4-like
889	chr2	153530118	153530144	27	*	1.59974e-07	3.09527e-05	0.00207102	-0.00203508	2.28642e-10	4.66739e-05	0.00920446	-0.00915778	TRUE	Promoter (<=1kb)	chr2	153407461	153529971	122511	-	329540	uc008nhv.2	-147	ENSMUSG00000061411	Nol4l	nucleolar protein 4-like
890	chr2	153530357	153530367	11	*	2.12244e-10	0.433533	0.00113467	0.432452	3.5779e-08	0.0128557	3.77079e-05	0.0128179	TRUE	Promoter (<=1kb)	chr2	153407461	153529971	122511	-	329540	uc008nhv.2	-386	ENSMUSG00000061411	Nol4l	nucleolar protein 4-like
891	chr2	153741265	153741536	272	*	7.37438e-07	0.00219043	3.61013e-05	0.00215435	8.06579e-10	0.0168744	2.50379e-05	0.0168511	TRUE	Promoter (<=1kb)	chr2	153741287	153773314	32028	+	13589	uc008nik.1	0	ENSMUSG00000027479	Mapre1	microtubule-associated protein, RP/EB family, member 1
892	chr2	153741265	153741536	272	*	5.48024e-07	0.00145755	3.08208e-05	0.0014268	8.06579e-10	0.0168744	2.50379e-05	0.0168511	TRUE	Promoter (<=1kb)	chr2	153741287	153773314	32028	+	13589	uc008nik.1	0	ENSMUSG00000027479	Mapre1	microtubule-associated protein, RP/EB family, member 1
893	chr2	154436895	154436994	100	*	8.97499e-08	3.40099e-05	0.00389331	-0.0038593	5.50769e-09	0.338976	0.00200719	0.336969	FALSE	Promoter (<=1kb)	chr2	154436484	154539356	102873	+	12396	uc008njf.2	510	ENSMUSG00000038533	Cbfa2t2	core-binding factor, runt domain, alpha subunit 2, translocated to, 2 (human)
894	chr2	154657451	154657515	65	*	8.98007e-05	0.00344996	8.10394e-05	0.00336892	2.73111e-09	0.000167773	0.0662295	-0.0660618	FALSE	Promoter (<=1kb)	chr2	154657026	154694783	37758	+	75608	uc008njq.1	489	ENSMUSG00000038467	Chmp4b	charged multivesicular body protein 4B
895	chr2	154791155	154791230	76	*	1.03078e-06	0.0020308	3.81318e-05	0.00199267	1.0078e-05	0.316843	0.007324	0.309519	TRUE	Promoter (<=1kb)	chr2	154791110	154867261	76152	+	19383	uc008njr.2	120	ENSMUSG00000027593	Raly	hnRNP-associated with lethal yellow
896	chr2	154892919	154892955	37	*	8.78362e-06	0.00134152	3.2945e-05	0.00130858	1.50302e-12	0.347064	0.000623606	0.34644	TRUE	Promoter (<=1kb)	chr2	154871410	154892906	21497	-	67204	uc008njw.1	-13	ENSMUSG00000074656	Eif2s2	eukaryotic translation initiation factor 2, subunit 2 (beta)
897	chr2	156179652	156179869	218	*	1.46546e-07	3.07964e-05	0.00188979	-0.0018597	3.16196e-11	0.343894	0.00104359	0.342549	FALSE	Promoter (<=1kb)	chr2	156147241	156179580	32340	-	170791	uc008nmq.3	-72	ENSMUSG00000027620	Rbm39	RNA binding motif protein 39
898	chr2	156179652	156179869	218	*	1.36615e-10	0.384762	0.00242508	0.382337	3.16196e-11	0.343894	0.00104359	0.342549	TRUE	Promoter (<=1kb)	chr2	156147241	156179580	32340	-	170791	uc008nmq.3	-72	ENSMUSG00000027620	Rbm39	RNA binding motif protein 39
899	chr2	156179652	156179869	218	*	5.35701e-07	3.22377e-05	0.00162468	-0.00159245	3.16196e-11	0.343894	0.00104359	0.342549	FALSE	Promoter (<=1kb)	chr2	156147241	156179580	32340	-	170791	uc008nmq.3	-72	ENSMUSG00000027620	Rbm39	RNA binding motif protein 39
900	chr2	156179652	156179869	218	*	5.39313e-11	0.38354	0.00147798	0.382062	3.16196e-11	0.343894	0.00104359	0.342549	TRUE	Promoter (<=1kb)	chr2	156147241	156179580	32340	-	170791	uc008nmq.3	-72	ENSMUSG00000027620	Rbm39	RNA binding motif protein 39
901	chr2	156475558	156475633	76	*	1.25163e-07	3.12589e-05	0.00255652	-0.00252488	1.40425e-08	0.00326688	2.50368e-05	0.00324181	FALSE	Promoter (<=1kb)	chr2	156475534	156543214	67681	+	13821	uc008nno.2	99	ENSMUSG00000027624	Epb41l1	erythrocyte membrane protein band 4.1 like 1
902	chr2	156475746	156475837	92	*	1.66733e-06	0.00132436	3.38629e-05	0.00129037	2.9279e-08	2.64688e-05	0.00307739	-0.00305129	FALSE	Promoter (<=1kb)	chr2	156475534	156543214	67681	+	13821	uc008nno.2	303	ENSMUSG00000027624	Epb41l1	erythrocyte membrane protein band 4.1 like 1
903	chr2	156840768	156840923	156	*	6.91998e-10	0.383247	0.00217018	0.381076	4.18401e-06	0.341645	0.00770803	0.333744	TRUE	Promoter (<=1kb)	chr2	156840007	156855569	15563	+	228839	uc008nnx.2	916	ENSMUSG00000062175	Tgif2	TGFB-induced factor homeobox 2
904	chr2	160872767	160872784	18	*	9.6825e-06	0.00209947	3.9433e-05	0.00206003	9.05693e-08	0.325392	0.00321097	0.322181	TRUE	Promoter (<=1kb)	chr2	160770447	160872572	102126	-	320799	uc008nre.1	-195	ENSMUSG00000035877	Zhx3	zinc fingers and homeoboxes 3
905	chr2	160872895	160872907	13	*	4.87295e-07	0.00195565	3.66961e-05	0.00191896	0.00013221	0.000437574	0.0178389	-0.0174013	FALSE	Promoter (<=1kb)	chr2	160770447	160872990	102544	-	320799	uc008nrf.1	83	ENSMUSG00000035877	Zhx3	zinc fingers and homeoboxes 3
906	chr2	162932104	162932139	36	*	1.87674e-08	0.384044	0.00857781	0.375466	1.27573e-12	0.344259	0.000604104	0.343655	TRUE	Promoter (<=1kb)	chr2	162931508	162937120	5613	+	67996	uc008nsc.2	631	ENSMUSG00000016921	Srsf6	serine/arginine-rich splicing factor 6
907	chr2	164911242	164911359	118	*	1.23864e-08	3.18371e-05	0.0105117	-0.0104798	4.49195e-09	2.533e-05	0.00179134	-0.0017653	TRUE	Promoter (<=1kb)	chr2	164891892	164911750	19859	-	329559	uc008nwr.1	391	ENSMUSG00000039834	Zfp335	zinc finger protein 335
908	chr2	164911242	164911359	118	*	1.00377e-06	0.383842	0.00721513	0.376615	4.49195e-09	2.533e-05	0.00179134	-0.0017653	FALSE	Promoter (<=1kb)	chr2	164891892	164911750	19859	-	329559	uc008nwr.1	391	ENSMUSG00000039834	Zfp335	zinc finger protein 335
909	chr2	164911242	164911359	118	*	2.18864e-08	3.28531e-05	0.00774093	-0.00770808	4.49195e-09	2.533e-05	0.00179134	-0.0017653	TRUE	Promoter (<=1kb)	chr2	164891892	164911750	19859	-	329559	uc008nwr.1	391	ENSMUSG00000039834	Zfp335	zinc finger protein 335
910	chr2	164911242	164911359	118	*	5.69525e-07	0.383804	0.00653449	0.37727	4.49195e-09	2.533e-05	0.00179134	-0.0017653	FALSE	Promoter (<=1kb)	chr2	164891892	164911750	19859	-	329559	uc008nwr.1	391	ENSMUSG00000039834	Zfp335	zinc finger protein 335
911	chr2	166154508	166154565	58	*	0.00240278	0.000296918	0.0148202	-0.0146687	1.67314e-06	0.00373535	0.293176	-0.289441	TRUE	Promoter (<=1kb)	chr2	166073899	166155285	81387	-	72043	uc008nyk.2	720	ENSMUSG00000006800	Sulf2	sulfatase 2
912	chr2	166995805	166995934	130	*	2.69506e-08	3.34408e-05	0.00787905	-0.00784605	1.03047e-07	3.50552e-05	0.00332956	-0.00329653	TRUE	Promoter (<=1kb)	chr2	166947549	166996299	48751	-	20853	uc008nyv.3	365	ENSMUSG00000039536	Stau1	staufen (RNA binding protein) homolog 1 (Drosophila)
913	chr2	166995967	166995984	18	*	2.69506e-08	3.34408e-05	0.00787905	-0.00784605	1.30153e-05	0.000654267	2.37304e-05	0.000630537	FALSE	Promoter (<=1kb)	chr2	166947549	166996299	48751	-	20853	uc008nyv.3	315	ENSMUSG00000039536	Stau1	staufen (RNA binding protein) homolog 1 (Drosophila)
914	chr2	166996205	166996220	16	*	2.69506e-08	3.34408e-05	0.00787905	-0.00784605	0.000154431	0.00465182	0.000116227	0.00453559	FALSE	Promoter (<=1kb)	chr2	166947549	166996299	48751	-	20853	uc008nyv.3	79	ENSMUSG00000039536	Stau1	staufen (RNA binding protein) homolog 1 (Drosophila)
915	chr2	167421953	167421975	23	*	4.16502e-05	0.000133771	0.010174	-0.0100402	5.75443e-14	0.345875	0.000384924	0.345496	FALSE	Promoter (<=1kb)	chr2	167421710	167436049	14340	+	77031	uc008nzn.2	265	ENSMUSG00000039463	Slc9a8	solute carrier family 9 (sodium/hydrogen exchanger), member 8
916	chr2	167421953	167421975	23	*	5.29087e-06	0.356888	0.00730608	0.349581	5.75443e-14	0.345875	0.000384924	0.345496	TRUE	Promoter (<=1kb)	chr2	167421710	167436049	14340	+	77031	uc008nzn.2	265	ENSMUSG00000039463	Slc9a8	solute carrier family 9 (sodium/hydrogen exchanger), member 8
917	chr2	167421953	167421975	23	*	2.79592e-05	0.000120404	0.0100652	-0.00994484	5.75443e-14	0.345875	0.000384924	0.345496	FALSE	Promoter (<=1kb)	chr2	167421710	167436049	14340	+	77031	uc008nzn.2	265	ENSMUSG00000039463	Slc9a8	solute carrier family 9 (sodium/hydrogen exchanger), member 8
918	chr2	167421953	167421975	23	*	3.77813e-06	0.364184	0.00715399	0.35703	5.75443e-14	0.345875	0.000384924	0.345496	TRUE	Promoter (<=1kb)	chr2	167421710	167436049	14340	+	77031	uc008nzn.2	265	ENSMUSG00000039463	Slc9a8	solute carrier family 9 (sodium/hydrogen exchanger), member 8
919	chr2	167492493	167492604	112	*	0.000302949	0.331696	0.0146544	0.317041	1.74933e-07	0.00456646	0.329602	-0.325036	FALSE	Promoter (<=1kb)	chr2	167492645	167516166	23522	+	81018	uc008nzv.1	-152	ENSMUSG00000006418	Rnf114	ring finger protein 114
920	chr2	167661508	167661668	161	*	2.23555e-13	0.38503	0.000552998	0.384415	4.97607e-07	5.64197e-05	0.00467818	-0.00460725	FALSE	Promoter (<=1kb)	chr2	167643225	167661544	18320	-	407243	uc008oad.1	0	ENSMUSG00000090213	Tmem189	transmembrane protein 189
921	chr2	173276189	173276331	143	*	0.00235452	3.50251e-05	0.000353263	-0.000318238	2.48017e-08	0.312921	0.000344519	0.310386	FALSE	Promoter (<=1kb)	chr2	173224465	173276533	52069	-	65112	uc008odq.1	202	ENSMUSG00000038400	Pmepa1	prostate transmembrane protein, androgen induced 1
922	chr2	174076371	174076418	48	*	2.44445e-06	0.0033587	5.2458e-05	0.00330106	3.2138e-05	0.00388437	0.202695	-0.198853	FALSE	Promoter (<=1kb)	chr2	174076321	174099771	23451	+	228960	uc008oej.1	97	ENSMUSG00000027522	Stx16	syntaxin 16
923	chr2	180042116	180042152	37	*	2.8334e-05	3.06925e-05	0.0012188	-0.00118811	5.73131e-15	0.346039	0.00027685	0.345762	FALSE	Promoter (<=1kb)	chr2	180036367	180042464	6098	-	26444	uc008oib.2	312	ENSMUSG00000027566	Psma7	proteasome (prosome, macropain) subunit, alpha type 7
924	chr2	180043117	180043132	16	*	0.00208369	0.000208875	3.0127e-05	0.000178748	0.00131525	0.0096161	0.186605	-0.176989	FALSE	Promoter (<=1kb)	chr2	180042483	180070201	27719	+	269397	uc008oic.2	649	ENSMUSG00000039086	Ss18l1	synovial sarcoma translocation gene on chromosome 18-like 1
925	chr2	180589259	180589299	41	*	1.95898e-07	0.367655	0.00491072	0.362744	9.70343e-06	0.000157846	0.00765452	-0.00751794	FALSE	Promoter (<=1kb)	chr2	180589407	180595831	6425	+	72075	uc008ojk.2	-148	ENSMUSG00000049401	Ogfr	opioid growth factor receptor
926	chr2	181287648	181287648	1	*	9.92883e-07	3.54717e-05	0.00162199	-0.00158652	4.92501e-13	0.000527151	0.34734	-0.346813	TRUE	Promoter (<=1kb)	chr2	181251451	181287966	36516	-	229004	uc008olr.1	318	ENSMUSG00000038705	Gmeb2	glucocorticoid modulatory element binding protein 2
927	chr2	181287654	181287665	12	*	9.92883e-07	3.54717e-05	0.00162199	-0.00158652	9.25548e-06	0.00044162	2.29241e-05	0.000418671	FALSE	Promoter (<=1kb)	chr2	181251451	181287966	36516	-	229004	uc008olr.1	301	ENSMUSG00000038705	Gmeb2	glucocorticoid modulatory element binding protein 2
928	chr2	181287667	181287667	1	*	9.92883e-07	3.54717e-05	0.00162199	-0.00158652	1.19158e-13	0.000554508	0.347572	-0.347017	TRUE	Promoter (<=1kb)	chr2	181251451	181287966	36516	-	229004	uc008olr.1	299	ENSMUSG00000038705	Gmeb2	glucocorticoid modulatory element binding protein 2
929	chr3	9609470	9609520	51	*	5.87605e-05	0.00104471	3.84474e-05	0.00100627	2.66148e-11	0.339948	0.00102029	0.338927	TRUE	Promoter (<=1kb)	chr3	9427010	9610085	183076	-	170753	uc012cnh.1	565	ENSMUSG00000040209	Zfp704	zinc finger protein 704
930	chr3	9609910	9609952	43	*	2.0759e-05	3.34795e-05	0.00169542	-0.00166194	0.000217736	2.85374e-05	0.000487451	-0.000458887	TRUE	Promoter (<=1kb)	chr3	9427010	9610085	183076	-	170753	uc012cnh.1	133	ENSMUSG00000040209	Zfp704	zinc finger protein 704
931	chr3	9609910	9609952	43	*	2.39342e-09	0.383068	0.00214307	0.380925	0.000217736	2.85374e-05	0.000487451	-0.000458887	FALSE	Promoter (<=1kb)	chr3	9427010	9610085	183076	-	170753	uc012cnh.1	133	ENSMUSG00000040209	Zfp704	zinc finger protein 704
932	chr3	9609957	9609967	11	*	2.39342e-09	0.383068	0.00214307	0.380925	1.72282e-13	0.338892	0.000371971	0.338524	TRUE	Promoter (<=1kb)	chr3	9427010	9610085	183076	-	170753	uc012cnh.1	118	ENSMUSG00000040209	Zfp704	zinc finger protein 704
933	chr3	19188052	19188088	37	*	0.000146243	3.33397e-05	0.000912799	-0.000879459	4.99969e-09	0.340539	0.00199495	0.338462	FALSE	Promoter (<=1kb)	chr3	19188221	19220817	32597	+	67472	uc008orr.2	-169	ENSMUSG00000027601	Mtfr1	mitochondrial fission regulator 1
934	chr3	19628436	19628540	105	*	3.48294e-05	0.338141	0.0104975	0.326176	1.51849e-07	0.00183193	0.251987	-0.250155	FALSE	Exon (uc033hsh.1/uc033hsh.1, exon 1 of 1)	chr3	19644460	19691599	47140	+	381485	uc008orw.1	-16024	ENSMUSG00000060913	Trim55	tripartite motif-containing 55
935	chr3	27710027	27710036	10	*	2.50015e-11	0.382917	0.000911069	0.382005	0.000109239	0.000312345	0.0179372	-0.0176249	FALSE	Promoter (<=1kb)	chr3	27416162	27710398	294237	-	72007	uc008otq.2	362	ENSMUSG00000039286	Fndc3b	fibronectin type III domain containing 3B
936	chr3	30602705	30602973	269	*	0.000115364	0.00692889	0.280744	-0.273815	3.28525e-09	0.23547	0.000711867	0.226215	FALSE	Promoter (<=1kb)	chr3	30602087	30619873	17787	+	80732	uc008oux.2	886	ENSMUSG00000037730	Mynn	myoneurin
937	chr3	30602705	30602973	269	*	1.8443e-05	0.00452481	7.07575e-05	0.00445405	3.28525e-09	0.23547	0.000711867	0.226215	TRUE	Promoter (<=1kb)	chr3	30602087	30619873	17787	+	80732	uc008oux.2	886	ENSMUSG00000037730	Mynn	myoneurin
938	chr3	30793047	30793047	1	*	0.000776016	0.263353	0.00738101	0.255972	1.06286e-07	0.25725	0.00158911	0.255661	TRUE	Promoter (<=1kb)	chr3	30792876	30821263	28388	+	69276	uc008ovh.1	171	ENSMUSG00000027706	Sec62	SEC62 homolog (S. cerevisiae)
939	chr3	30793413	30793423	11	*	1.55142e-06	0.00353886	4.05858e-05	0.00347007	6.64184e-07	0.338445	0.00470876	0.333548	TRUE	Promoter (<=1kb)	chr3	30792876	30821263	28388	+	69276	uc008ovh.1	547	ENSMUSG00000027706	Sec62	SEC62 homolog (S. cerevisiae)
940	chr3	30793503	30793605	103	*	1.55142e-06	0.00353886	4.05858e-05	0.00347007	4.13327e-06	0.000381677	0.0289001	-0.0285184	FALSE	Promoter (<=1kb)	chr3	30792876	30821263	28388	+	69276	uc008ovh.1	729	ENSMUSG00000027706	Sec62	SEC62 homolog (S. cerevisiae)
941	chr3	30793611	30793617	7	*	1.55142e-06	0.00353886	4.05858e-05	0.00347007	0.000259992	0.00370068	8.65306e-05	0.00361415	TRUE	Promoter (<=1kb)	chr3	30792876	30821263	28388	+	69276	uc008ovh.1	741	ENSMUSG00000027706	Sec62	SEC62 homolog (S. cerevisiae)
942	chr3	30793619	30793619	1	*	1.55142e-06	0.00353886	4.05858e-05	0.00347007	3.2014e-09	0.00193856	0.344906	-0.342967	FALSE	Promoter (<=1kb)	chr3	30792876	30821263	28388	+	69276	uc008ovh.1	743	ENSMUSG00000027706	Sec62	SEC62 homolog (S. cerevisiae)
943	chr3	30793627	30793631	5	*	1.55142e-06	0.00353886	4.05858e-05	0.00347007	8.54063e-07	0.00179068	2.44313e-05	0.00176625	TRUE	Promoter (<=1kb)	chr3	30792876	30821263	28388	+	69276	uc008ovh.1	755	ENSMUSG00000027706	Sec62	SEC62 homolog (S. cerevisiae)
944	chr3	30793639	30793639	1	*	1.55142e-06	0.00353886	4.05858e-05	0.00347007	1.21713e-09	0.00164048	0.344954	-0.343314	FALSE	Promoter (<=1kb)	chr3	30792876	30821263	28388	+	69276	uc008ovh.1	763	ENSMUSG00000027706	Sec62	SEC62 homolog (S. cerevisiae)
945	chr3	30793640	30793640	1	*	1.55142e-06	0.00353886	4.05858e-05	0.00347007	1.23857e-06	0.00162715	2.45364e-05	0.00160261	TRUE	Promoter (<=1kb)	chr3	30792876	30821263	28388	+	69276	uc008ovh.1	764	ENSMUSG00000027706	Sec62	SEC62 homolog (S. cerevisiae)
946	chr3	30793647	30793647	1	*	1.55142e-06	0.00353886	4.05858e-05	0.00347007	2.16746e-08	0.00178508	0.348223	-0.346438	FALSE	Promoter (<=1kb)	chr3	30792876	30821263	28388	+	69276	uc008ovh.1	771	ENSMUSG00000027706	Sec62	SEC62 homolog (S. cerevisiae)
947	chr3	30793648	30793648	1	*	1.55142e-06	0.00353886	4.05858e-05	0.00347007	1.85705e-06	0.00176442	2.52304e-05	0.00173919	TRUE	Promoter (<=1kb)	chr3	30792876	30821263	28388	+	69276	uc008ovh.1	772	ENSMUSG00000027706	Sec62	SEC62 homolog (S. cerevisiae)
948	chr3	30793649	30793657	9	*	1.55142e-06	0.00353886	4.05858e-05	0.00347007	1.85324e-08	0.00172824	0.348192	-0.346463	FALSE	Promoter (<=1kb)	chr3	30792876	30821263	28388	+	69276	uc008ovh.1	781	ENSMUSG00000027706	Sec62	SEC62 homolog (S. cerevisiae)
949	chr3	30793659	30793659	1	*	1.55142e-06	0.00353886	4.05858e-05	0.00347007	2.85254e-06	0.00157165	2.53987e-05	0.00154625	TRUE	Promoter (<=1kb)	chr3	30792876	30821263	28388	+	69276	uc008ovh.1	783	ENSMUSG00000027706	Sec62	SEC62 homolog (S. cerevisiae)
950	chr3	30793663	30793663	1	*	1.55142e-06	0.00353886	4.05858e-05	0.00347007	9.34512e-09	0.001497	0.347877	-0.34638	FALSE	Promoter (<=1kb)	chr3	30792876	30821263	28388	+	69276	uc008ovh.1	787	ENSMUSG00000027706	Sec62	SEC62 homolog (S. cerevisiae)
951	chr3	32397379	32397448	70	*	2.04329e-07	2.99209e-05	0.00117837	-0.00114771	8.69654e-05	2.69612e-05	0.000710568	-0.000683607	TRUE	Distal Intergenic	chr3	32334794	32365665	30872	-	22401	uc008owc.1	-31714	ENSMUSG00000027663	Zmat3	zinc finger matrin type 3
952	chr3	32737008	32737086	79	*	0.000182551	8.64648e-05	0.00433025	-0.00424378	2.44144e-05	3.4898e-05	0.00195587	-0.00191433	TRUE	Promoter (<=1kb)	chr3	32737063	32751559	14497	+	66046	uc008owq.1	0	ENSMUSG00000027673	Ndufb5	NADH dehydrogenase (ubiquinone) 1 beta subcomplex, 5
953	chr3	34020650	34020749	100	*	4.54915e-06	0.00216069	3.34491e-05	0.00212517	5.29066e-06	0.338466	0.00797352	0.330682	TRUE	Promoter (<=1kb)	chr3	34020079	34069344	49266	+	14359	uc008oxk.2	670	ENSMUSG00000027680	Fxr1	fragile X mental retardation gene 1, autosomal homolog
954	chr3	35754124	35754215	92	*	3.48788e-08	3.21953e-05	0.00520626	-0.00517407	8.22211e-08	0.315618	0.00240079	0.312833	FALSE	Promoter (<=1kb)	chr3	35754138	35829688	75551	+	76295	uc008oys.1	0	ENSMUSG00000037400	Atp11b	ATPase, class VI, type 11B
955	chr3	35754253	35754399	147	*	1.4563e-07	0.381379	0.00506963	0.376276	1.06408e-06	3.48789e-05	0.00388273	-0.00384786	FALSE	Promoter (<=1kb)	chr3	35754138	35829688	75551	+	76295	uc008oys.1	261	ENSMUSG00000037400	Atp11b	ATPase, class VI, type 11B
956	chr3	40800662	40800705	44	*	4.72901e-06	0.0040776	4.95499e-05	0.00402805	3.91999e-10	2.76487e-05	0.00434808	-0.00432043	FALSE	Promoter (<=1kb)	chr3	40799951	40806065	6115	+	20873	uc008pbm.1	754	ENSMUSG00000025758	Plk4	polo-like kinase 4
957	chr3	51276822	51276822	1	*	7.39467e-09	0.380146	0.00250202	0.377644	1.25543e-07	0.00361723	2.61709e-05	0.00359106	TRUE	Promoter (<=1kb)	chr3	51276761	51278407	1647	+	67746	uc008pdu.2	61	ENSMUSG00000087440	4930577N17Rik	RIKEN cDNA 4930577N17 gene
958	chr3	51276823	51276831	9	*	7.39467e-09	0.380146	0.00250202	0.377644	4.74562e-08	0.00289532	0.342168	-0.339272	FALSE	Promoter (<=1kb)	chr3	51276761	51278407	1647	+	67746	uc008pdu.2	70	ENSMUSG00000087440	4930577N17Rik	RIKEN cDNA 4930577N17 gene
959	chr3	51276832	51276849	18	*	7.39467e-09	0.380146	0.00250202	0.377644	9.49271e-07	0.00197551	2.66407e-05	0.00194887	TRUE	Promoter (<=1kb)	chr3	51276761	51278407	1647	+	67746	uc008pdu.2	88	ENSMUSG00000087440	4930577N17Rik	RIKEN cDNA 4930577N17 gene
960	chr3	51276850	51276904	55	*	7.39467e-09	0.380146	0.00250202	0.377644	1.78693e-07	2.31177e-05	0.00100191	-0.00097879	FALSE	Promoter (<=1kb)	chr3	51276761	51278407	1647	+	67746	uc008pdu.2	143	ENSMUSG00000087440	4930577N17Rik	RIKEN cDNA 4930577N17 gene
961	chr3	51277081	51277085	5	*	2.17465e-05	3.14265e-05	0.00154431	-0.00151288	0.00394535	0.00138301	0.0248137	-0.0234307	TRUE	Promoter (<=1kb)	chr3	51276761	51278407	1647	+	67746	uc008pdu.2	324	ENSMUSG00000087440	4930577N17Rik	RIKEN cDNA 4930577N17 gene
962	chr3	51277312	51277334	23	*	3.27488e-07	0.00454691	4.10471e-05	0.00450455	4.04441e-12	0.000684597	0.345155	-0.344471	FALSE	Promoter (<=1kb)	chr3	51252720	51277514	24795	-	69257	uc008pdo.2	180	ENSMUSG00000037174	Elf2	E74-like factor 2
963	chr3	52102535	52102636	102	*	0.000144057	3.38118e-05	0.00118508	-0.00114149	4.51518e-05	0.0016652	4.16657e-05	0.00162354	FALSE	Promoter (2-3kb)	chr3	51687613	52105006	417394	-	433586	uc008pef.2	2370	ENSMUSG00000061143	Maml3	mastermind like 3 (Drosophila)
964	chr3	53041507	53041523	17	*	7.04377e-05	6.11898e-05	0.00389579	-0.0038346	2.10899e-05	0.000134292	0.00893231	-0.00879802	TRUE	Promoter (<=1kb)	chr3	53041547	53261679	220133	+	108927	uc008pep.1	-40	ENSMUSG00000048332	Lhfp	lipoma HMGIC fusion partner
965	chr3	53041507	53041523	17	*	6.76056e-10	0.384602	0.00211822	0.382494	2.10899e-05	0.000134292	0.00893231	-0.00879802	FALSE	Promoter (<=1kb)	chr3	53041547	53261679	220133	+	108927	uc008pep.1	-40	ENSMUSG00000048332	Lhfp	lipoma HMGIC fusion partner
966	chr3	58416490	58416697	208	*	4.1235e-05	0.00127656	4.08321e-05	0.00123572	3.66279e-07	0.00290517	5.48681e-05	0.0028503	TRUE	Promoter (1-2kb)	chr3	58415689	58466787	51099	+	72033	uc008php.1	1008	ENSMUSG00000027806	Tsc22d2	TSC22 domain family, member 2
967	chr3	58525961	58525967	7	*	4.11918e-06	6.86357e-05	0.00467172	-0.00460728	4.60856e-10	0.344189	0.00142349	0.342766	FALSE	Promoter (<=1kb)	chr3	58521971	58525884	3914	-	28146	uc008phs.2	-77	ENSMUSG00000027808	Serp1	stress-associated endoplasmic reticulum protein 1
968	chr3	58692006	58692070	65	*	0.000581687	0.00829566	0.259956	-0.25166	3.81763e-06	0.00504458	0.303052	-0.298024	TRUE	Promoter (<=1kb)	chr3	58674949	58692388	17440	-	20439	uc008pia.1	318	ENSMUSG00000036432	Siah2	seven in absentia 2
969	chr3	58692410	58692480	71	*	8.95293e-08	0.00134232	3.74802e-05	0.00129094	1.32704e-07	4.39981e-05	0.00456147	-0.00451748	FALSE	Promoter (<=1kb)	chr3	58674949	58692388	17440	-	20439	uc008pia.1	-22	ENSMUSG00000036432	Siah2	seven in absentia 2
970	chr3	61365624	61365664	41	*	1.21346e-10	0.38306	0.00132382	0.381737	0.000373105	5.31708e-05	0.00109251	-0.00103934	FALSE	Promoter (1-2kb)	chr3	61364507	61368703	4197	+	74012	uc008pjl.1	1157	ENSMUSG00000036894	Rap2b	RAP2B, member of RAS oncogene family
971	chr3	65529100	65529253	154	*	0.000788767	0.00127138	6.83178e-05	0.00120306	1.25861e-05	3.37575e-05	0.00167313	-0.00163662	FALSE	Promoter (<=1kb)	chr3	65515315	65529414	14100	-	71004	uc008pkq.2	161	ENSMUSG00000074580	4931440P22Rik	RIKEN cDNA 4931440P22 gene
972	chr3	69044434	69044539	106	*	1.3101e-14	0.384738	0.000380376	0.384357	4.5316e-06	2.30148e-05	0.000772724	-0.000749709	FALSE	Promoter (<=1kb)	chr3	69035294	69044742	9449	-	66949	uc008pmd.2	203	ENSMUSG00000034317	Trim59	tripartite motif-containing 59
973	chr3	69044922	69044951	30	*	1.27344e-08	0.00349813	3.78126e-05	0.00346032	6.3338e-07	0.338992	0.00538396	0.333608	TRUE	Promoter (<=1kb)	chr3	69035294	69044742	9449	-	66949	uc008pmd.2	-180	ENSMUSG00000034317	Trim59	tripartite motif-containing 59
974	chr3	69044959	69044959	1	*	1.27344e-08	0.00349813	3.78126e-05	0.00346032	1.32625e-08	3.43867e-05	0.00641775	-0.00638336	FALSE	Promoter (<=1kb)	chr3	69035294	69044742	9449	-	66949	uc008pmd.2	-217	ENSMUSG00000034317	Trim59	tripartite motif-containing 59
975	chr3	69044960	69044962	3	*	1.27344e-08	0.00349813	3.78126e-05	0.00346032	2.2163e-06	0.33206	0.00640195	0.325658	TRUE	Promoter (<=1kb)	chr3	69035294	69044742	9449	-	66949	uc008pmd.2	-218	ENSMUSG00000034317	Trim59	tripartite motif-containing 59
976	chr3	69126886	69127051	166	*	2.46894e-05	0.00205097	5.25909e-05	0.00199838	9.35127e-10	0.340477	0.00205726	0.33842	TRUE	Promoter (<=1kb)	chr3	69072221	69127092	54872	-	16649	uc008pme.1	41	ENSMUSG00000027782	Kpna4	karyopherin (importin) alpha 4
977	chr3	84814676	84814701	26	*	1.89685e-05	0.00227864	4.57131e-05	0.00223293	9.2076e-09	0.00222247	0.342236	-0.340018	FALSE	Promoter (<=1kb)	chr3	84815577	84979198	163622	+	50754	uc008pqk.2	-901	ENSMUSG00000028086	Fbxw7	F-box and WD-40 domain protein 7
978	chr3	84814713	84814713	1	*	1.89685e-05	0.00227864	4.57131e-05	0.00223293	9.91678e-07	0.00219863	2.65915e-05	0.00217204	TRUE	Promoter (<=1kb)	chr3	84815577	84979198	163622	+	50754	uc008pqk.2	-864	ENSMUSG00000028086	Fbxw7	F-box and WD-40 domain protein 7
979	chr3	84814721	84814721	1	*	1.89685e-05	0.00227864	4.57131e-05	0.00223293	9.91538e-09	0.00222264	0.341706	-0.339483	FALSE	Promoter (<=1kb)	chr3	84815577	84979198	163622	+	50754	uc008pqk.2	-856	ENSMUSG00000028086	Fbxw7	F-box and WD-40 domain protein 7
980	chr3	88510081	88510118	38	*	5.23471e-07	0.00236355	3.66833e-05	0.00232694	1.18538e-06	0.00492246	0.321532	-0.31661	FALSE	Distal Intergenic	chr3	88481148	88503352	22205	-	16905	uc008pvj.3	-6729	ENSMUSG00000028063	Lmna	lamin A
981	chr3	88686087	88686196	110	*	2.7485e-05	0.000199381	0.0192787	-0.0190793	1.92539e-05	2.42742e-05	0.000606287	-0.000582832	TRUE	Promoter (<=1kb)	chr3	88685794	88688062	2269	+	74200	uc008pwe.2	402	ENSMUSG00000028060	2810403A07Rik	RIKEN cDNA 2810403A07 gene
982	chr3	89321314	89321363	50	*	4.96203e-13	0.384229	0.000427972	0.383801	2.46551e-05	0.220758	0.00427984	0.216479	TRUE	Promoter (1-2kb)	chr3	89314951	89322879	7929	-	13638	uc008pyq.1	1516	ENSMUSG00000028039	Efna3	ephrin A3
983	chr3	89321314	89321363	50	*	3.76421e-05	3.79775e-05	0.00199374	-0.00195576	2.46551e-05	0.220758	0.00427984	0.216479	FALSE	Promoter (1-2kb)	chr3	89314951	89322879	7929	-	13638	uc008pyq.1	1516	ENSMUSG00000028039	Efna3	ephrin A3
984	chr3	89321381	89321381	1	*	3.76421e-05	3.79775e-05	0.00199374	-0.00195576	0.000404967	0.000142068	0.00356699	-0.00342492	TRUE	Promoter (1-2kb)	chr3	89314951	89322879	7929	-	13638	uc008pyq.1	1498	ENSMUSG00000028039	Efna3	ephrin A3
985	chr3	89520217	89520283	67	*	0.000160276	0.00591896	0.000125644	0.00579332	1.46837e-06	0.0053341	0.333262	-0.328465	FALSE	Promoter (<=1kb)	chr3	89520164	89672494	152331	+	140493	uc012cso.1	119	ENSMUSG00000000794	Kcnn3	potassium intermediate/small conductance calcium-activated channel, subfamily N, member 3
986	chr3	90051930	90051953	24	*	1.33116e-05	5.69235e-05	0.00808142	-0.0080245	7.84188e-05	0.00170875	4.69743e-05	0.00166177	FALSE	Promoter (<=1kb)	chr3	90051636	90063341	11706	+	99650	uc008qbd.3	317	ENSMUSG00000027942	4933434E20Rik	RIKEN cDNA 4933434E20 gene
987	chr3	90247996	90248026	31	*	6.88068e-07	0.00368207	4.4672e-05	0.0036374	5.17616e-07	0.00496734	4.81029e-05	0.00491924	TRUE	Promoter (<=1kb)	chr3	90248192	90253612	5421	+	30791	uc012csu.1	-196	ENSMUSG00000052310	Slc39a1	solute carrier family 39 (zinc transporter), member 1
988	chr3	94838173	94838281	109	*	6.01507e-06	2.98384e-05	0.00084795	-0.000818111	2.51179e-10	2.40188e-05	0.00467397	-0.00464989	TRUE	Promoter (<=1kb)	chr3	94837567	94865722	28156	+	229584	uc008qhb.2	714	ENSMUSG00000038902	Pogz	pogo transposable element with ZNF domain
989	chr3	95106843	95106909	67	*	7.68218e-12	4.44145e-05	0.00866208	-0.0086179	1.16181e-08	3.09305e-05	0.005959	-0.00592807	TRUE	Promoter (<=1kb)	chr3	95058530	95106930	48401	-	18720	uc008qhx.3	21	ENSMUSG00000028126	Pip5k1a	phosphatidylinositol-4-phosphate 5-kinase, type 1 alpha
990	chr3	95229079	95229127	49	*	1.59452e-05	0.00467778	6.67073e-05	0.00461107	8.12201e-05	0.00207126	6.90175e-05	0.00200224	TRUE	Promoter (<=1kb)	chr3	95228943	95236424	7482	+	57912	uc008qiv.2	184	ENSMUSG00000046722	Cdc42se1	CDC42 small effector 1
991	chr3	95855900	95855976	77	*	0.000151386	3.00827e-05	0.000651483	-0.000621405	6.14348e-10	2.42793e-05	0.00202308	-0.00199889	TRUE	Promoter (<=1kb)	chr3	95830622	95855815	25194	-	70767	uc008qlg.1	-85	ENSMUSG00000015748	Prpf3	PRP3 pre-mRNA processing factor 3 homolog (yeast)
992	chr3	101377396	101377477	82	*	2.01903e-06	0.00320568	4.95992e-05	0.00315512	3.25836e-06	2.57109e-05	0.00111063	-0.00108478	FALSE	Promoter (<=1kb)	chr3	101377125	101463060	85936	+	78908	uc008qrg.2	352	ENSMUSG00000042035	Igsf3	immunoglobulin superfamily, member 3
993	chr3	101604706	101604743	38	*	6.23263e-14	0.385029	0.000480645	0.384548	7.77387e-06	0.000721783	2.34833e-05	0.0006983	TRUE	Promoter (<=1kb)	chr3	101576219	101604707	28489	-	11928	uc008qrj.2	0	ENSMUSG00000033161	Atp1a1	ATPase, Na+/K+ transporting, alpha 1 polypeptide
994	chr3	105800996	105801034	39	*	9.82626e-05	0.000506795	3.04526e-05	0.000476343	2.19185e-13	0.000539094	0.346186	-0.345647	FALSE	Promoter (<=1kb)	chr3	105727260	105801381	74122	-	109905	uc008qve.2	347	ENSMUSG00000068798	Rap1a	RAS-related protein-1a
995	chr3	108210117	108210197	81	*	1.64178e-05	3.1219e-05	0.00164358	-0.00161236	4.7888e-09	0.00108076	0.275847	-0.274556	TRUE	Promoter (<=1kb)	chr3	108202228	108210527	8300	-	72522	uc008qyl.2	330	ENSMUSG00000048997	Atxn7l2	ataxin 7-like 2
996	chr3	108654097	108654168	72	*	2.3587e-06	3.35878e-05	0.00346159	-0.00342824	1.52989e-05	0.00848834	0.299287	-0.290799	TRUE	Promoter (<=1kb)	chr3	108653990	108678011	24022	+	229725	uc008qzn.2	178	ENSMUSG00000027884	Clcc1	chloride channel CLIC-like 1
997	chr3	109340608	109340647	40	*	3.58249e-11	0.383153	0.0011319	0.382021	1.35582e-10	0.343626	0.00119268	0.34245	TRUE	Promoter (<=1kb)	chr3	109340683	109563541	222859	+	57257	uc008raf.1	-75	ENSMUSG00000033721	Vav3	vav 3 oncogene
998	chr3	116424103	116424177	75	*	5.41443e-09	0.381092	0.00303184	0.377944	2.21156e-07	0.313018	0.0039434	0.308621	TRUE	Promoter (<=1kb)	chr3	116272553	116424032	151480	-	229776	uc008rca.1	-71	ENSMUSG00000033502	Cdc14a	CDC14 cell division cycle 14A
999	chr3	116595110	116595110	1	*	9.04892e-06	3.78799e-05	0.00300882	-0.00297094	0.00348652	0.00127656	0.0233226	-0.022046	TRUE	Promoter (<=1kb)	chr3	116594958	116621602	26645	+	72776	uc008rcm.2	152	ENSMUSG00000027959	Sass6	spindle assembly 6 homolog (C. elegans)
1000	chr3	116595273	116595350	78	*	1.53065e-05	0.00169359	3.95847e-05	0.001654	5.90402e-10	0.326349	0.00116157	0.325188	TRUE	Promoter (<=1kb)	chr3	116581336	116595593	14258	-	229780	uc008rcj.1	243	ENSMUSG00000033439	Trmt13	tRNA methyltransferase 13
1001	chr3	116808277	116808287	11	*	0.000231018	6.28562e-05	0.00241428	-0.00235142	1.42426e-05	0.00571255	0.284863	-0.27915	TRUE	Promoter (<=1kb)	chr3	116739999	116808166	68168	-	77559	uc008rcq.1	-111	ENSMUSG00000033400	Agl	amylo-1,6-glucosidase, 4-alpha-glucanotransferase
1002	chr3	116808293	116808293	1	*	0.000231018	6.28562e-05	0.00241428	-0.00235142	6.24589e-06	0.00474993	5.88102e-05	0.00469111	FALSE	Promoter (<=1kb)	chr3	116739999	116808166	68168	-	77559	uc008rcq.1	-127	ENSMUSG00000033400	Agl	amylo-1,6-glucosidase, 4-alpha-glucanotransferase
1003	chr3	122274289	122274364	76	*	4.12117e-13	0.385002	0.000612502	0.38439	1.47802e-11	0.343812	0.00101547	0.342797	TRUE	Promoter (<=1kb)	chr3	122274414	122285271	10858	+	99480	uc008rep.1	-125	ENSMUSG00000039756	Dnttip2	deoxynucleotidyltransferase, terminal, interacting protein 2
1004	chr3	122619273	122619319	47	*	4.269e-06	0.00152645	4.04231e-05	0.00148603	5.38364e-06	0.0220481	0.000207333	0.0218408	TRUE	Promoter (<=1kb)	chr3	122538719	122619714	80996	-	214459	uc008rer.3	395	ENSMUSG00000039735	Fnbp1l	formin binding protein 1-like
1005	chr3	122619459	122619509	51	*	1.04532e-08	0.378629	0.00199561	0.374874	1.7214e-13	0.000427412	0.343823	-0.343529	FALSE	Promoter (<=1kb)	chr3	122538719	122619714	80996	-	214459	uc008rer.3	205	ENSMUSG00000039735	Fnbp1l	formin binding protein 1-like
1006	chr3	122619557	122619557	1	*	1.04532e-08	0.378629	0.00199561	0.374874	1.52405e-07	0.343799	0.00415106	0.339648	TRUE	Promoter (<=1kb)	chr3	122538719	122619714	80996	-	214459	uc008rer.3	157	ENSMUSG00000039735	Fnbp1l	formin binding protein 1-like
1007	chr3	122619569	122619569	1	*	1.04532e-08	0.378629	0.00199561	0.374874	2.73006e-07	2.76495e-05	0.00360577	-0.00357812	FALSE	Promoter (<=1kb)	chr3	122538719	122619714	80996	-	214459	uc008rer.3	145	ENSMUSG00000039735	Fnbp1l	formin binding protein 1-like
1008	chr3	122619576	122619576	1	*	1.04532e-08	0.378629	0.00199561	0.374874	1.82609e-07	0.337504	0.00358966	0.333914	TRUE	Promoter (<=1kb)	chr3	122538719	122619714	80996	-	214459	uc008rer.3	138	ENSMUSG00000039735	Fnbp1l	formin binding protein 1-like
1009	chr3	122619579	122619638	60	*	1.04532e-08	0.378629	0.00199561	0.374874	5.13895e-06	6.73029e-05	0.00410225	-0.00406064	FALSE	Promoter (<=1kb)	chr3	122538719	122619714	80996	-	214459	uc008rer.3	76	ENSMUSG00000039735	Fnbp1l	formin binding protein 1-like
1010	chr3	126596625	126596653	29	*	3.27926e-07	0.381266	0.00494291	0.376445	0.000356836	0.00110467	0.0384493	-0.0372752	FALSE	Promoter (<=1kb)	chr3	126596951	126685392	88442	+	108058	uc008rge.2	-326	ENSMUSG00000053819	Camk2d	calcium/calmodulin-dependent protein kinase II, delta
1011	chr3	127896272	127896354	83	*	4.08352e-07	5.54059e-05	0.00630828	-0.00625287	2.55463e-08	0.00395805	0.339081	-0.335123	TRUE	Promoter (<=1kb)	chr3	127869688	127896323	26636	-	70617	uc008rhr.2	0	ENSMUSG00000050549	5730508B09Rik	RIKEN cDNA 5730508B09 gene
1012	chr3	130060374	130060527	154	*	1.34243e-08	0.0132445	5.86369e-05	0.0131859	1.59587e-05	0.323135	0.0113539	0.311763	TRUE	Promoter (<=1kb)	chr3	129983185	130060907	77723	-	99683	uc008rit.1	380	ENSMUSG00000001052	Sec24b	Sec24 related gene family, member B (S. cerevisiae)
1013	chr3	130060374	130060527	154	*	1.52226e-05	0.00122201	3.12106e-05	0.00118171	1.59587e-05	0.323135	0.0113539	0.311763	TRUE	Promoter (<=1kb)	chr3	129983185	130060907	77723	-	99683	uc008rit.1	380	ENSMUSG00000001052	Sec24b	Sec24 related gene family, member B (S. cerevisiae)
1014	chr3	133310814	133310855	42	*	6.35373e-09	0.373605	0.00221083	0.371394	0.000107951	0.0038969	8.62591e-05	0.00381064	TRUE	Promoter (<=1kb)	chr3	133310110	133378235	68126	+	74776	uc008rkm.2	745	ENSMUSG00000028013	Ppa2	pyrophosphatase (inorganic) 2
1015	chr3	133310814	133310855	42	*	0.00013242	7.10841e-05	0.00332708	-0.003256	0.000107951	0.0038969	8.62591e-05	0.00381064	FALSE	Promoter (<=1kb)	chr3	133310110	133378235	68126	+	74776	uc008rkm.2	745	ENSMUSG00000028013	Ppa2	pyrophosphatase (inorganic) 2
1016	chr3	133310814	133310855	42	*	1.62436e-05	0.335521	0.00731575	0.328205	0.000107951	0.0038969	8.62591e-05	0.00381064	TRUE	Promoter (<=1kb)	chr3	133310110	133378235	68126	+	74776	uc008rkm.2	745	ENSMUSG00000028013	Ppa2	pyrophosphatase (inorganic) 2
1017	chr3	135826068	135826144	77	*	0.000232833	0.00399068	0.000103954	0.00388672	2.69916e-06	0.00687598	0.335185	-0.330544	FALSE	Promoter (<=1kb)	chr3	135826090	135888572	62483	+	67547	uc008rmb.2	0	ENSMUSG00000053897	Slc39a8	solute carrier family 39 (metal ion transporter), member 8
1018	chr3	138527474	138527534	61	*	4.39148e-06	0.0016605	4.19882e-05	0.00162609	1.30431e-07	2.53572e-05	0.00177092	-0.00174133	FALSE	Promoter (1-2kb)	chr3	138526421	138526485	65	+	100316706	uc012cym.1	1113	ENSMUSG00000088373	Mir1956	microRNA 1956
1019	chr3	138527658	138527666	9	*	4.39148e-06	0.0016605	4.19882e-05	0.00162609	4.9519e-09	0.345939	0.00394131	0.341998	TRUE	Promoter (1-2kb)	chr3	138526421	138526485	65	+	100316706	uc012cym.1	1245	ENSMUSG00000088373	Mir1956	microRNA 1956
1020	chr3	142881095	142881120	26	*	8.52668e-05	0.0055274	0.000129112	0.00539829	9.91131e-06	0.284313	0.00485455	0.279459	TRUE	Promoter (<=1kb)	chr3	142790902	142882004	91103	-	109333	uc008rpe.2	884	ENSMUSG00000004591	Pkn2	protein kinase N2
1021	chr3	146812755	146812814	60	*	0.000290056	0.000354316	3.01339e-05	0.000323597	6.03665e-07	0.0553555	0.000447237	0.0549808	TRUE	Promoter (<=1kb)	chr3	146729579	146812946	83368	-	18749	uc008rrv.2	132	ENSMUSG00000005034	Prkacb	protein kinase, cAMP dependent, catalytic, beta
1022	chr3	152667348	152667397	50	*	0.000100259	0.00040469	0.0145721	-0.0141674	0.000215224	0.0090679	0.230593	-0.221627	TRUE	Promoter (<=1kb)	chr3	152666913	152681432	14520	+	99542	uc029upf.1	484	ENSMUSG00000097745	AI115009	expressed sequence AI115009
1023	chr4	3938711	3938756	46	*	0.000229676	0.00274689	9.56596e-05	0.0026506	3.59025e-08	0.339646	0.00377921	0.335867	TRUE	Promoter (<=1kb)	chr4	3938888	3943525	4638	+	66433	uc008rwq.2	-177	ENSMUSG00000042198	Chchd7	coiled-coil-helix-coiled-coil-helix domain containing 7
1024	chr4	8647159	8647169	11	*	4.36182e-14	0.385151	0.00040176	0.384797	3.71402e-12	0.300017	0.000410206	0.299607	TRUE	Distal Intergenic	chr4	8690406	8755906	65501	+	320790	uc008rxy.1	-43247	ENSMUSG00000041235	Chd7	chromodomain helicase DNA binding protein 7
1025	chr4	8647177	8647178	2	*	4.36182e-14	0.385151	0.00040176	0.384797	9.57249e-05	2.43678e-05	0.000426887	-0.000402519	FALSE	Distal Intergenic	chr4	8690406	8755906	65501	+	320790	uc008rxy.1	-43229	ENSMUSG00000041235	Chd7	chromodomain helicase DNA binding protein 7
1026	chr4	8647180	8647219	40	*	4.36182e-14	0.385151	0.00040176	0.384797	3.11572e-12	0.345068	0.000619971	0.344592	TRUE	Distal Intergenic	chr4	8690406	8755906	65501	+	320790	uc008rxy.1	-43226	ENSMUSG00000041235	Chd7	chromodomain helicase DNA binding protein 7
1027	chr4	19569790	19569840	51	*	0.000215386	0.00121655	4.92132e-05	0.00116733	2.72268e-08	0.327445	0.0030416	0.326396	TRUE	Promoter (<=1kb)	chr4	19519252	19570104	50853	-	70568	uc008sby.1	264	ENSMUSG00000028228	Cpne3	copine III
1028	chr4	19575098	19575186	89	*	6.98658e-05	0.00176873	5.33745e-05	0.00171535	5.47493e-08	2.77268e-05	0.00290207	-0.00287434	FALSE	Promoter (<=1kb)	chr4	19575066	19606932	31867	+	66302	uc008sca.3	120	ENSMUSG00000028229	Rmdn1	regulator of microtubule dynamics 1
1029	chr4	20008267	20008420	154	*	1.89578e-08	0.00639875	4.92401e-05	0.00634951	8.78811e-09	0.343144	0.0026961	0.340624	TRUE	Promoter (<=1kb)	chr4	20008428	20030785	22358	+	50500	uc008scj.1	-161	ENSMUSG00000073988	Ttpa	tocopherol (alpha) transfer protein
1030	chr4	21776276	21776314	39	*	2.69457e-11	0.38316	0.00104971	0.382085	0.000346657	0.000568875	0.0182004	-0.0176371	FALSE	Promoter (<=1kb)	chr4	21776270	21784840	8571	+	77593	uc008scy.1	44	ENSMUSG00000040455	Usp45	ubiquitin specific petidase 45
1031	chr4	21880058	21880127	70	*	1.38245e-05	3.3932e-05	0.00220612	-0.00217219	9.19851e-08	0.000268776	0.0276624	-0.0273936	TRUE	Promoter (<=1kb)	chr4	21879675	21912126	32452	+	230027	uc008sdj.1	452	ENSMUSG00000028247	Coq3	coenzyme Q3 homolog, methyltransferase (yeast)
1032	chr4	24966602	24966605	4	*	0.000102815	3.27263e-05	0.00118251	-0.0011446	0.000221347	0.0112317	0.000197124	0.0110345	FALSE	Distal Intergenic	chr4	24973419	25009233	35815	+	81006	uc008see.1	-6817	ENSMUSG00000040372	Gpr63	G protein-coupled receptor 63
1033	chr4	24966607	24966610	4	*	0.000102815	3.27263e-05	0.00118251	-0.0011446	9.37231e-07	0.00675836	0.34539	-0.338631	TRUE	Distal Intergenic	chr4	24973419	25009233	35815	+	81006	uc008see.1	-6812	ENSMUSG00000040372	Gpr63	G protein-coupled receptor 63
1034	chr4	32950809	32950839	31	*	5.41181e-05	4.99933e-05	0.00241297	-0.00236505	3.89367e-13	0.000341023	0.395469	-0.394969	TRUE	Promoter (<=1kb)	chr4	32804035	32950826	146792	-	140577	uc008sfj.1	0	ENSMUSG00000040183	Ankrd6	ankyrin repeat domain 6
1035	chr4	35157107	35157146	40	*	4.98745e-06	0.00201703	4.41988e-05	0.00197283	1.84191e-05	0.0142376	0.000299349	0.0139383	TRUE	Promoter (<=1kb)	chr4	34949074	35157484	208411	-	214944	uc008sgs.2	338	ENSMUSG00000073910	Mob3b	MOB kinase activator 3B
1036	chr4	40853554	40853567	14	*	9.80333e-07	0.357309	0.00626397	0.351431	1.67648e-05	0.0256538	0.000396537	0.0252572	TRUE	Promoter (<=1kb)	chr4	40804582	40854537	49956	-	14595	uc008shw.2	970	ENSMUSG00000028413	B4galt1	UDP-Gal:betaGlcNAc beta 1,4- galactosyltransferase, polypeptide 1
1037	chr4	42917128	42917219	92	*	5.48681e-11	0.38453	0.0015953	0.38288	3.11823e-17	0.346248	7.49717e-05	0.346116	TRUE	Promoter (<=1kb)	chr4	42917251	42941607	24357	+	230085	uc008soj.1	-123	ENSMUSG00000036062	Phf24	PHD finger protein 24
1038	chr4	42949837	42949837	1	*	1.2147e-05	0.00375957	7.14809e-05	0.00368809	0.00116452	0.0816811	0.00374752	0.0779336	TRUE	Promoter (<=1kb)	chr4	42949867	42958732	8866	+	56323	uc008som.1	-30	ENSMUSG00000036052	Dnajb5	DnaJ (Hsp40) homolog, subfamily B, member 5
1039	chr4	44167578	44167672	95	*	1.32079e-05	0.000429641	2.96839e-05	0.000399957	2.08334e-09	0.335775	0.00255279	0.333222	TRUE	Promoter (<=1kb)	chr4	44126212	44167648	41437	-	73469	uc008srr.2	0	ENSMUSG00000035696	Rnf38	ring finger protein 38
1040	chr4	46138709	46138831	123	*	3.45891e-12	0.384794	0.000873127	0.38397	5.23725e-13	0.342887	0.000558089	0.342329	TRUE	Promoter (<=1kb)	chr4	46138511	46160099	21589	+	433702	uc008stj.1	320	ENSMUSG00000028330	Ncbp1	nuclear cap binding protein subunit 1
1041	chr4	46138899	46138899	1	*	1.18502e-05	0.00237246	3.99897e-05	0.00233247	0.00763915	0.00268731	0.0536301	-0.0509428	FALSE	Promoter (<=1kb)	chr4	46138511	46160099	21589	+	433702	uc008stj.1	388	ENSMUSG00000028330	Ncbp1	nuclear cap binding protein subunit 1
1042	chr4	46389789	46389789	1	*	2.43898e-09	0.368139	0.00181954	0.366319	0.00122949	0.00154359	8.58273e-05	0.00145776	TRUE	Promoter (<=1kb)	chr4	46376975	46389423	12449	-	74753	uc008stp.1	-366	ENSMUSG00000028331	5830415F09Rik	RIKEN cDNA 5830415F09 gene
1043	chr4	46389791	46389823	33	*	2.43898e-09	0.368139	0.00181954	0.366319	1.53139e-08	0.00175784	0.305754	-0.303996	FALSE	Promoter (<=1kb)	chr4	46376975	46389423	12449	-	74753	uc008stp.1	-368	ENSMUSG00000028331	5830415F09Rik	RIKEN cDNA 5830415F09 gene
1044	chr4	46389828	46389828	1	*	2.43898e-09	0.368139	0.00181954	0.366319	0.00011321	0.00162074	5.23647e-05	0.00156838	TRUE	Promoter (<=1kb)	chr4	46376975	46389423	12449	-	74753	uc008stp.1	-405	ENSMUSG00000028331	5830415F09Rik	RIKEN cDNA 5830415F09 gene
1045	chr4	46389844	46389845	2	*	2.43898e-09	0.368139	0.00181954	0.366319	7.25886e-10	0.00129467	0.329909	-0.328614	FALSE	Promoter (<=1kb)	chr4	46376975	46389423	12449	-	74753	uc008stp.1	-421	ENSMUSG00000028331	5830415F09Rik	RIKEN cDNA 5830415F09 gene
1046	chr4	46389846	46389847	2	*	2.43898e-09	0.368139	0.00181954	0.366319	2.92528e-05	0.001271	3.54266e-05	0.00123557	TRUE	Promoter (<=1kb)	chr4	46376975	46389423	12449	-	74753	uc008stp.1	-423	ENSMUSG00000028331	5830415F09Rik	RIKEN cDNA 5830415F09 gene
1047	chr4	46389872	46389882	11	*	2.43898e-09	0.368139	0.00181954	0.366319	8.76923e-11	0.00101298	0.342963	-0.34195	FALSE	Promoter (<=1kb)	chr4	46376975	46389423	12449	-	74753	uc008stp.1	-449	ENSMUSG00000028331	5830415F09Rik	RIKEN cDNA 5830415F09 gene
1048	chr4	46452254	46452479	226	*	4.20141e-10	0.380934	0.0019775	0.378959	4.98649e-05	0.00107004	3.35763e-05	0.00103564	TRUE	Promoter (1-2kb)	chr4	46451117	46472523	21407	+	67628	uc008stt.1	1362	ENSMUSG00000028333	Anp32b	acidic (leucine-rich) nuclear phosphoprotein 32 family, member B
1049	chr4	47353202	47353305	104	*	0.000250695	0.00214586	8.40118e-05	0.00206184	4.7692e-07	4.24306e-05	0.00354554	-0.0035035	FALSE	Promoter (<=1kb)	chr4	47353305	47414924	61620	+	21812	uc008sun.1	0	ENSMUSG00000007613	Tgfbr1	transforming growth factor, beta receptor I
1050	chr4	47353202	47353305	104	*	0.000130431	2.99678e-05	0.00064417	-0.00061457	4.7692e-07	4.24306e-05	0.00354554	-0.0035035	TRUE	Promoter (<=1kb)	chr4	47353305	47414924	61620	+	21812	uc008sun.1	0	ENSMUSG00000007613	Tgfbr1	transforming growth factor, beta receptor I
1051	chr4	47353368	47353386	19	*	0.000130431	2.99678e-05	0.00064417	-0.00061457	3.84734e-08	0.331202	0.00260556	0.328597	FALSE	Promoter (<=1kb)	chr4	47353305	47414924	61620	+	21812	uc008sun.1	81	ENSMUSG00000007613	Tgfbr1	transforming growth factor, beta receptor I
1052	chr4	54948223	54948223	1	*	2.21621e-05	0.000224367	0.0145897	-0.0143653	6.33558e-08	0.000257883	0.0177858	-0.0175279	TRUE	Promoter (<=1kb)	chr4	54947945	55083563	135619	+	242466	uc008sxi.1	278	ENSMUSG00000060206	Zfp462	zinc finger protein 462
1053	chr4	59189056	59189083	28	*	0.000298585	3.04743e-05	0.000464607	-0.000434133	2.80803e-09	0.00210378	0.335716	-0.333612	TRUE	Promoter (<=1kb)	chr4	59189550	59218910	29361	+	22234	uc008szr.1	-494	ENSMUSG00000028381	Ugcg	UDP-glucose ceramide glucosyltransferase
1054	chr4	59805740	59805762	23	*	2.69719e-07	6.05389e-05	0.00659508	-0.00652949	3.86405e-05	2.29967e-05	0.000417925	-0.000394928	TRUE	Promoter (<=1kb)	chr4	59805650	59904740	99091	+	209131	uc008tae.1	112	ENSMUSG00000028385	Snx30	sorting nexin family member 30
1055	chr4	72200958	72201007	50	*	6.44738e-08	0.384014	0.00378465	0.380229	4.52732e-06	0.000829949	2.31482e-05	0.0008068	TRUE	Promoter (<=1kb)	chr4	72109945	72200893	90949	-	21885	uc008tif.3	-65	ENSMUSG00000008305	Tle1	transducin-like enhancer of split 1, homolog of Drosophila E(spl)
1056	chr4	80911278	80911312	35	*	4.58268e-05	5.84843e-05	0.00314379	-0.00308531	2.97102e-05	8.55629e-05	0.00516223	-0.00507491	TRUE	Promoter (<=1kb)	chr4	80910686	80954301	43616	+	52829	uc008tjv.1	626	ENSMUSG00000048706	Lurap1l	leucine rich adaptor protein 1-like
1057	chr4	84885002	84885013	12	*	2.25746e-05	0.00547591	8.92031e-05	0.0053867	0.000594542	0.0540847	0.00145095	0.0526338	TRUE	Promoter (<=1kb)	chr4	84884309	84958603	74295	+	338349	uc008tlk.2	704	ENSMUSG00000038070	Cntln	centlein, centrosomal protein
1058	chr4	86748982	86748984	3	*	9.59745e-09	0.431863	0.00176602	0.42969	6.94519e-05	0.000221693	0.0208821	-0.0206604	FALSE	Promoter (<=1kb)	chr4	86748555	86826080	77526	+	329877	uc033idc.1	429	ENSMUSG00000038024	Dennd4c	DENN/MADD domain containing 4C
1059	chr4	86856835	86856841	7	*	2.4381e-06	0.400795	0.00458133	0.396214	0.000683541	0.300483	0.0191574	0.281325	TRUE	Promoter (<=1kb)	chr4	86854099	86857367	3269	-	20104	uc008tme.1	526	ENSMUSG00000028495	Rps6	ribosomal protein S6
1060	chr4	86857085	86857159	75	*	4.51041e-06	0.00192008	3.38119e-05	0.00188736	6.16267e-07	2.77384e-05	0.00130036	-0.00127262	FALSE	Promoter (<=1kb)	chr4	86854099	86857367	3269	-	20104	uc008tme.1	208	ENSMUSG00000028495	Rps6	ribosomal protein S6
1061	chr4	94556433	94556563	131	*	1.58337e-05	0.00177341	3.97096e-05	0.0017337	0.000198663	0.000823759	0.246129	-0.226403	FALSE	Promoter (<=1kb)	chr4	94500079	94556796	56718	-	67770	uc008tsa.2	233	ENSMUSG00000028578	Caap1	caspase activity and apoptosis inhibitor 1
1062	chr4	94556729	94556777	49	*	2.41353e-11	0.384521	0.0010996	0.38317	1.04965e-09	0.00177631	0.338768	-0.336991	FALSE	Promoter (<=1kb)	chr4	94500079	94556796	56718	-	67770	uc008tsa.2	19	ENSMUSG00000028578	Caap1	caspase activity and apoptosis inhibitor 1
1063	chr4	95052446	95052716	271	*	7.17181e-07	0.00306479	4.33579e-05	0.00302415	1.37413e-08	0.00307834	2.67142e-05	0.00305355	TRUE	Promoter (<=1kb)	chr4	95049036	95052222	3187	-	16476	uc008tsq.2	-224	ENSMUSG00000052684	Jun	jun proto-oncogene
1064	chr4	100776557	100776798	242	*	1.6218e-07	3.72396e-05	0.00352165	-0.00348441	6.02347e-11	0.0194666	5.74422e-05	0.0194091	FALSE	Promoter (<=1kb)	chr4	100776679	100984296	207618	+	320508	uc008tvg.1	0	ENSMUSG00000028532	Cachd1	cache domain containing 1
1065	chr4	103119404	103119450	47	*	9.02927e-13	0.385305	0.000707985	0.384597	3.11838e-06	0.00395579	4.25229e-05	0.0039136	TRUE	Promoter (<=1kb)	chr4	103119390	103142573	23184	+	71148	uc008txg.1	60	ENSMUSG00000028522	Mier1	mesoderm induction early response 1 homolog (Xenopus laevis
1066	chr4	105109556	105109693	138	*	1.97482e-06	0.00313653	4.701e-05	0.00308975	4.51386e-05	0.000964012	2.97155e-05	0.000934296	TRUE	Promoter (<=1kb)	chr4	105029650	105109898	80249	-	108079	uc008tyd.2	205	ENSMUSG00000028518	Prkaa2	protein kinase, AMP-activated, alpha 2 catalytic subunit
1067	chr4	108459340	108459358	19	*	0.000246417	3.01421e-05	0.000731174	-0.000701032	5.12493e-10	0.341351	0.001435	0.339916	FALSE	Promoter (<=1kb)	chr4	108459426	108559415	99990	+	230594	uc008ubd.1	-86	ENSMUSG00000034610	Zcchc11	zinc finger, CCHC domain containing 11
1068	chr4	108459362	108459362	1	*	0.000246417	3.01421e-05	0.000731174	-0.000701032	5.61576e-05	6.22431e-05	0.00186293	-0.00180068	TRUE	Promoter (<=1kb)	chr4	108459426	108559415	99990	+	230594	uc008ubd.1	-64	ENSMUSG00000034610	Zcchc11	zinc finger, CCHC domain containing 11
1069	chr4	108459638	108459648	11	*	8.53229e-05	3.04999e-05	0.000860835	-0.000830335	5.38061e-07	0.00178666	2.9294e-05	0.00175737	FALSE	Promoter (<=1kb)	chr4	108459426	108559415	99990	+	230594	uc008ubd.1	222	ENSMUSG00000034610	Zcchc11	zinc finger, CCHC domain containing 11
1070	chr4	108459650	108459650	1	*	8.53229e-05	3.04999e-05	0.000860835	-0.000830335	1.27818e-09	0.00170631	0.339084	-0.337378	TRUE	Promoter (<=1kb)	chr4	108459426	108559415	99990	+	230594	uc008ubd.1	224	ENSMUSG00000034610	Zcchc11	zinc finger, CCHC domain containing 11
1071	chr4	108459653	108459755	103	*	8.53229e-05	3.04999e-05	0.000860835	-0.000830335	2.57375e-06	0.00115223	2.38005e-05	0.00112843	FALSE	Promoter (<=1kb)	chr4	108459426	108559415	99990	+	230594	uc008ubd.1	329	ENSMUSG00000034610	Zcchc11	zinc finger, CCHC domain containing 11
1072	chr4	108619780	108619868	89	*	6.31676e-05	2.96175e-05	0.000250943	-0.000221325	5.8895e-14	0.000149398	0.0340323	-0.0333928	TRUE	Promoter (<=1kb)	chr4	108619956	108634122	14167	+	319965	uc008ubl.1	-176	ENSMUSG00000028582	Cc2d1b	coiled-coil and C2 domain containing 1B
1073	chr4	108619780	108619868	89	*	2.72227e-09	0.379087	0.00167025	0.376439	5.8895e-14	0.000149398	0.0340323	-0.0333928	FALSE	Promoter (<=1kb)	chr4	108619956	108634122	14167	+	319965	uc008ubl.1	-176	ENSMUSG00000028582	Cc2d1b	coiled-coil and C2 domain containing 1B
1074	chr4	108620083	108620083	1	*	0.00145088	0.00101934	7.30518e-05	0.00094629	0.00119818	0.0283747	0.000864523	0.0275102	TRUE	Promoter (<=1kb)	chr4	108619956	108634122	14167	+	319965	uc008ubl.1	127	ENSMUSG00000028582	Cc2d1b	coiled-coil and C2 domain containing 1B
1075	chr4	109665941	109666012	72	*	1.40473e-05	4.03221e-05	0.00310999	-0.00306967	6.77224e-11	0.339038	0.000948362	0.33807	FALSE	Promoter (<=1kb)	chr4	109660876	109665372	4497	-	12580	uc008ucr.1	-569	ENSMUSG00000028551	Cdkn2c	cyclin-dependent kinase inhibitor 2C (p18, inhibits CDK4)
1076	chr4	109666452	109666489	38	*	3.43768e-06	4.14301e-05	0.002414	-0.00237257	1.65743e-06	5.37224e-05	0.00719915	-0.00714543	TRUE	Promoter (<=1kb)	chr4	109660876	109666756	5881	-	12580	uc008ucs.2	267	ENSMUSG00000028551	Cdkn2c	cyclin-dependent kinase inhibitor 2C (p18, inhibits CDK4)
1077	chr4	114986752	114986846	95	*	1.28166e-06	0.00201192	3.82553e-05	0.00197367	1.10863e-12	0.345921	0.000665838	0.345198	TRUE	Promoter (<=1kb)	chr4	114960613	114987228	26616	-	66588	uc008ueg.2	382	ENSMUSG00000028719	Cmpk1	cytidine monophosphate (UMP-CMP) kinase 1
1078	chr4	114987229	114987270	42	*	2.45314e-05	0.00179399	4.32931e-05	0.00175758	5.47261e-06	0.00140857	3.00604e-05	0.00137863	TRUE	Promoter (<=1kb)	chr4	114960613	114987228	26616	-	66588	uc008ueg.2	-1	ENSMUSG00000028719	Cmpk1	cytidine monophosphate (UMP-CMP) kinase 1
1079	chr4	116150156	116150205	50	*	0.00361835	0.00898187	0.000436544	0.00854533	1.35641e-07	0.00289588	3.2654e-05	0.00286323	TRUE	Promoter (<=1kb)	chr4	116150518	116159844	9327	+	68273	uc008ugh.2	-362	ENSMUSG00000028700	Pomgnt1	protein O-linked mannose beta 1,2-N-acetylglucosaminyltransferase
1080	chr4	116150682	116150682	1	*	2.59696e-06	0.000790202	3.04398e-05	0.000760235	0.00898154	0.00754303	0.106089	-0.0985464	FALSE	Promoter (<=1kb)	chr4	116150518	116159844	9327	+	68273	uc008ugh.2	164	ENSMUSG00000028700	Pomgnt1	protein O-linked mannose beta 1,2-N-acetylglucosaminyltransferase
1081	chr4	116220921	116221039	119	*	6.26729e-07	4.85564e-05	0.00392516	-0.0038766	2.55095e-07	3.22719e-05	0.00590956	-0.00587467	TRUE	Promoter (<=1kb)	chr4	116221914	116303056	81143	+	18710	uc008ugm.1	-993	ENSMUSG00000028698	Pik3r3	phosphatidylinositol 3 kinase, regulatory subunit, polypeptide 3 (p55)
1082	chr4	116626973	116627022	50	*	3.34904e-07	5.16295e-05	0.00674408	-0.00669245	2.28825e-08	0.00199568	0.295775	-0.293779	TRUE	Promoter (<=1kb)	chr4	116601052	116627497	26446	-	50927	uc008ugx.1	475	ENSMUSG00000028693	Nasp	nuclear autoantigenic sperm protein (histone-binding)
1083	chr4	116995360	116995498	139	*	1.27551e-12	0.383857	0.000702791	0.383215	2.44563e-08	3.34371e-05	0.00303394	-0.0030005	FALSE	Promoter (<=1kb)	chr4	116995348	117005277	9930	+	76608	uc008uht.1	150	ENSMUSG00000046861	Hectd3	HECT domain containing 3
1084	chr4	117155937	117156066	130	*	4.80093e-06	0.00216215	4.75186e-05	0.0021156	2.00023e-07	0.344388	0.00453658	0.339497	TRUE	Promoter (<=1kb)	chr4	117153836	117156132	2297	-	20116	uc008uic.1	66	ENSMUSG00000047675	Rps8	ribosomal protein S8
1085	chr4	118134588	118134765	178	*	0.0016909	0.250523	0.0042712	0.246252	9.4362e-13	2.87159e-05	0.00533361	-0.00530489	FALSE	Promoter (<=1kb)	chr4	117932153	118134946	202794	-	20441	uc008ujk.3	181	ENSMUSG00000028538	St3gal3	ST3 beta-galactoside alpha-2,3-sialyltransferase 3
1086	chr4	118134588	118134765	178	*	0.000195129	0.00882339	0.305554	-0.29673	9.4362e-13	2.87159e-05	0.00533361	-0.00530489	TRUE	Promoter (<=1kb)	chr4	117932153	118134946	202794	-	20441	uc008ujk.3	181	ENSMUSG00000028538	St3gal3	ST3 beta-galactoside alpha-2,3-sialyltransferase 3
1087	chr4	119539593	119539602	10	*	6.52599e-05	0.00091632	3.78759e-05	0.00087469	1.03331e-12	0.000568311	0.34265	-0.342082	FALSE	Promoter (<=1kb)	chr4	119539661	119588547	48887	+	230700	uc008umq.2	-68	ENSMUSG00000032998	Foxj3	forkhead box J3
1088	chr4	119539828	119539927	100	*	7.22112e-08	0.000418555	0.013576	-0.0130833	7.3741e-11	2.63206e-05	0.0031917	-0.00316538	TRUE	Promoter (<=1kb)	chr4	119539661	119588547	48887	+	230700	uc008umq.2	266	ENSMUSG00000032998	Foxj3	forkhead box J3
1089	chr4	119540107	119540162	56	*	8.19511e-07	0.261566	0.000793485	0.260773	9.37065e-13	0.345546	0.000640714	0.344966	TRUE	Promoter (<=1kb)	chr4	119539661	119588547	48887	+	230700	uc008umq.2	501	ENSMUSG00000032998	Foxj3	forkhead box J3
1090	chr4	120825565	120825573	9	*	1.98811e-13	0.384422	0.000530687	0.383893	4.2489e-06	0.288457	0.00483452	0.283622	TRUE	Promoter (<=1kb)	chr4	120757435	120825741	68307	-	18046	uc008unn.2	168	ENSMUSG00000032897	Nfyc	nuclear transcription factor-Y gamma
1091	chr4	120825574	120825574	1	*	1.98811e-13	0.384422	0.000530687	0.383893	2.84342e-05	9.49291e-05	0.00505903	-0.0049641	FALSE	Promoter (<=1kb)	chr4	120757435	120825741	68307	-	18046	uc008unn.2	167	ENSMUSG00000032897	Nfyc	nuclear transcription factor-Y gamma
1092	chr4	120825581	120825581	1	*	1.98811e-13	0.384422	0.000530687	0.383893	1.5741e-05	0.275761	0.00573893	0.270022	TRUE	Promoter (<=1kb)	chr4	120757435	120825741	68307	-	18046	uc008unn.2	160	ENSMUSG00000032897	Nfyc	nuclear transcription factor-Y gamma
1093	chr4	120825582	120825582	1	*	1.98811e-13	0.384422	0.000530687	0.383893	5.62827e-05	0.000119435	0.00585857	-0.00573914	FALSE	Promoter (<=1kb)	chr4	120757435	120825741	68307	-	18046	uc008unn.2	159	ENSMUSG00000032897	Nfyc	nuclear transcription factor-Y gamma
1094	chr4	120825584	120825605	22	*	1.98811e-13	0.384422	0.000530687	0.383893	3.01313e-05	0.26922	0.0062756	0.262944	TRUE	Promoter (<=1kb)	chr4	120757435	120825741	68307	-	18046	uc008unn.2	136	ENSMUSG00000032897	Nfyc	nuclear transcription factor-Y gamma
1095	chr4	121214932	121215010	79	*	1.82099e-05	5.82065e-05	0.00541047	-0.00535306	1.03475e-05	2.47204e-05	0.000804194	-0.000779474	TRUE	Promoter (<=1kb)	chr4	121145373	121215076	69704	-	109263	uc008uoc.1	66	ENSMUSG00000049878	Rlf	rearranged L-myc fusion sequence
1096	chr4	123201323	123201381	59	*	5.74128e-05	3.02116e-05	0.000930064	-0.000899853	1.44804e-07	2.84674e-05	0.00214388	-0.00211541	TRUE	Promoter (<=1kb)	chr4	123201553	123216207	14655	+	230718	uc008uoy.1	-230	ENSMUSG00000054958	Nt5c1a	5'-nucleotidase, cytosolic IA
1097	chr4	124850541	124850767	227	*	4.30395e-05	0.000577735	2.96946e-05	0.000548	5.39143e-12	0.343985	0.000702972	0.343282	TRUE	Promoter (<=1kb)	chr4	124850759	124855242	4484	+	230734	uc008urf.2	0	ENSMUSG00000028889	Yrdc	yrdC domain containing (E.coli)
1098	chr4	124851014	124851064	51	*	0.000111557	3.11041e-05	0.000739388	-0.000708284	6.2187e-05	2.45544e-05	0.000476137	-0.000451583	TRUE	Promoter (<=1kb)	chr4	124850759	124855242	4484	+	230734	uc008urf.2	305	ENSMUSG00000028889	Yrdc	yrdC domain containing (E.coli)
1099	chr4	125066502	125066587	86	*	0.000411969	0.00654442	0.000498253	0.00604617	9.39716e-07	7.79288e-05	0.00990413	-0.0098309	FALSE	Promoter (<=1kb)	chr4	125066693	125074043	7351	+	76793	uc008urq.2	-191	ENSMUSG00000050213	Snip1	Smad nuclear interacting protein 1
1100	chr4	125066761	125066874	114	*	2.4324e-05	0.000891381	3.19019e-05	0.000859479	4.62113e-06	0.17779	0.00153824	0.172926	TRUE	Promoter (<=1kb)	chr4	125066693	125074043	7351	+	76793	uc008urq.2	181	ENSMUSG00000050213	Snip1	Smad nuclear interacting protein 1
1101	chr4	126202490	126202560	71	*	1.83205e-05	7.87939e-05	0.00845114	-0.00821945	6.76383e-06	0.000132586	0.0178272	-0.0176946	TRUE	Promoter (<=1kb)	chr4	126164083	126202710	38628	-	230753	uc008usv.1	150	ENSMUSG00000043962	Thrap3	thyroid hormone receptor associated protein 3
1102	chr4	126533267	126533326	60	*	1.64177e-10	0.380153	0.00105993	0.378925	8.08096e-07	0.00174017	3.0587e-05	0.00170958	TRUE	Promoter (<=1kb)	chr4	126489543	126533458	43916	-	76850	uc008utk.2	132	ENSMUSG00000042500	Ago4	argonaute RISC catalytic subunit 4
1103	chr4	127021884	127021884	1	*	1.61839e-07	0.00512714	4.29645e-05	0.00508418	2.00112e-07	0.337526	0.00365399	0.333872	TRUE	Promoter (<=1kb)	chr4	127021301	127031236	9936	+	71514	uc008utz.2	583	ENSMUSG00000028820	Sfpq	splicing factor proline/glutamine rich (polypyrimidine tract binding protein associated)
1104	chr4	127021889	127021889	1	*	1.61839e-07	0.00512714	4.29645e-05	0.00508418	7.20159e-07	3.01878e-05	0.00326321	-0.00323302	FALSE	Promoter (<=1kb)	chr4	127021301	127031236	9936	+	71514	uc008utz.2	588	ENSMUSG00000028820	Sfpq	splicing factor proline/glutamine rich (polypyrimidine tract binding protein associated)
1105	chr4	127021901	127021901	1	*	1.61839e-07	0.00512714	4.29645e-05	0.00508418	3.05871e-08	0.337492	0.00257138	0.33492	TRUE	Promoter (<=1kb)	chr4	127021301	127031236	9936	+	71514	uc008utz.2	600	ENSMUSG00000028820	Sfpq	splicing factor proline/glutamine rich (polypyrimidine tract binding protein associated)
1106	chr4	127021902	127021902	1	*	1.61839e-07	0.00512714	4.29645e-05	0.00508418	1.61108e-06	3.01115e-05	0.00252674	-0.00249663	FALSE	Promoter (<=1kb)	chr4	127021301	127031236	9936	+	71514	uc008utz.2	601	ENSMUSG00000028820	Sfpq	splicing factor proline/glutamine rich (polypyrimidine tract binding protein associated)
1107	chr4	127021904	127021905	2	*	1.61839e-07	0.00512714	4.29645e-05	0.00508418	2.21826e-08	0.337446	0.00242378	0.335022	TRUE	Promoter (<=1kb)	chr4	127021301	127031236	9936	+	71514	uc008utz.2	604	ENSMUSG00000028820	Sfpq	splicing factor proline/glutamine rich (polypyrimidine tract binding protein associated)
1108	chr4	127021907	127021923	17	*	1.61839e-07	0.00512714	4.29645e-05	0.00508418	3.39536e-06	3.11464e-05	0.00215273	-0.00212158	FALSE	Promoter (<=1kb)	chr4	127021301	127031236	9936	+	71514	uc008utz.2	622	ENSMUSG00000028820	Sfpq	splicing factor proline/glutamine rich (polypyrimidine tract binding protein associated)
1109	chr4	127021942	127021942	1	*	1.61839e-07	0.00512714	4.29645e-05	0.00508418	3.85705e-09	0.328123	0.00161124	0.326512	TRUE	Promoter (<=1kb)	chr4	127021301	127031236	9936	+	71514	uc008utz.2	641	ENSMUSG00000028820	Sfpq	splicing factor proline/glutamine rich (polypyrimidine tract binding protein associated)
1110	chr4	127061170	127061205	36	*	1.45756e-14	0.383302	0.000402487	0.382826	3.67925e-08	0.325356	0.00303435	0.322322	TRUE	Promoter (<=1kb)	chr4	127047094	127061132	14039	-	68310	uc008uue.1	-38	ENSMUSG00000043872	Zmym1	zinc finger, MYM domain containing 1
1111	chr4	127244200	127244211	12	*	0.000248551	7.35919e-05	0.00243917	-0.00234996	6.45664e-13	0.000406603	0.344027	-0.343621	TRUE	Promoter (<=1kb)	chr4	127243784	127247809	4026	+	80284	uc008uuq.1	427	ENSMUSG00000042380	Smim12	small integral membrane protein 12
1112	chr4	129377393	129377428	36	*	1.49832e-06	3.22252e-05	0.00124344	-0.00121159	1.10792e-08	0.337411	0.00267926	0.334832	FALSE	Promoter (<=1kb)	chr4	129353632	129378028	24397	-	73680	uc008uww.1	600	ENSMUSG00000028807	Zbtb8a	zinc finger and BTB domain containing 8a
1113	chr4	129820197	129820209	13	*	7.15289e-16	0.384356	0.000240728	0.384079	4.21422e-05	0.286957	0.00685561	0.280102	TRUE	Promoter (<=1kb)	chr4	129820221	129850003	29783	+	19244	uc008uyf.2	-24	ENSMUSG00000028788	Ptp4a2	protein tyrosine phosphatase 4a2
1114	chr4	129820567	129820763	197	*	2.78559e-06	0.00274179	4.75961e-05	0.00269419	6.1068e-08	0.278632	0.00218757	0.273453	TRUE	Promoter (<=1kb)	chr4	129820708	129850003	29296	+	19244	uc008uyh.2	0	ENSMUSG00000028788	Ptp4a2	protein tyrosine phosphatase 4a2
1115	chr4	129820567	129820763	197	*	3.55885e-05	0.000973845	3.50594e-05	0.000938786	6.1068e-08	0.278632	0.00218757	0.273453	TRUE	Promoter (<=1kb)	chr4	129820708	129850003	29296	+	19244	uc008uyh.2	0	ENSMUSG00000028788	Ptp4a2	protein tyrosine phosphatase 4a2
1116	chr4	131873431	131873431	1	*	9.62817e-05	3.18691e-05	0.000894876	-0.000863067	7.37208e-10	0.00136013	0.326924	-0.325564	TRUE	Promoter (<=1kb)	chr4	131873639	131901725	28087	+	57317	uc008vaf.2	-208	ENSMUSG00000028911	Srsf4	serine/arginine-rich splicing factor 4
1117	chr4	131873673	131873916	244	*	0.00172332	0.00248478	0.000145813	0.00233897	1.35252e-10	0.297219	0.000740056	0.296692	TRUE	Promoter (<=1kb)	chr4	131873639	131901725	28087	+	57317	uc008vaf.2	277	ENSMUSG00000028911	Srsf4	serine/arginine-rich splicing factor 4
1118	chr4	131873673	131873916	244	*	0.00334142	0.0047787	0.130481	-0.125702	1.35252e-10	0.297219	0.000740056	0.296692	FALSE	Promoter (<=1kb)	chr4	131873639	131901725	28087	+	57317	uc008vaf.2	277	ENSMUSG00000028911	Srsf4	serine/arginine-rich splicing factor 4
1119	chr4	131873934	131873973	40	*	1.95685e-06	0.00310269	4.75143e-05	0.00306288	2.64953e-05	2.70169e-05	0.000486049	-0.000459032	FALSE	Promoter (<=1kb)	chr4	131873639	131901725	28087	+	57317	uc008vaf.2	334	ENSMUSG00000028911	Srsf4	serine/arginine-rich splicing factor 4
1120	chr4	132074677	132074693	17	*	1.65023e-07	0.374237	0.0048376	0.3694	0.000343491	0.00860117	0.223758	-0.215157	FALSE	Promoter (<=1kb)	chr4	131923427	132075313	151887	-	269587	uc008van.3	620	ENSMUSG00000028906	Epb41	erythrocyte membrane protein band 4.1
1121	chr4	132732513	132732513	1	*	2.55348e-05	4.01268e-05	0.00187073	-0.00182384	0.00312565	0.00296048	0.0001816	0.00277888	FALSE	Promoter (<=1kb)	chr4	132724904	132732546	7643	-	381560	uc008vbr.1	33	ENSMUSG00000037752	Xkr8	X Kell blood group precursor related family member 8 homolog
1122	chr4	133012911	133012919	9	*	1.0954e-05	3.39868e-05	0.00272389	-0.00268991	8.68637e-05	0.0143116	0.000245843	0.0140658	FALSE	Promoter (1-2kb)	chr4	133011506	133066277	54772	+	230793	uc008vcc.1	1413	ENSMUSG00000037692	Ahdc1	AT hook, DNA binding motif, containing 1
1123	chr4	133212489	133212608	120	*	7.21606e-05	3.14089e-05	0.000946835	-0.000915173	2.65097e-08	0.0041986	2.76188e-05	0.00417172	FALSE	Promoter (<=1kb)	chr4	133209340	133212536	3197	-	14748	uc008vci.1	0	ENSMUSG00000049649	Gpr3	G-protein coupled receptor 3
1124	chr4	133546032	133546032	1	*	1.92896e-12	0.38507	0.000773343	0.384369	5.84898e-05	4.49918e-05	0.00140476	-0.00135976	FALSE	Promoter (<=1kb)	chr4	133532542	133546027	13486	-	18221	uc012dmm.1	-5	ENSMUSG00000028851	Nudc	nuclear distribution gene C homolog (Aspergillus)
1125	chr4	133546044	133546044	1	*	1.92896e-12	0.38507	0.000773343	0.384369	1.3911e-07	0.300052	0.00252899	0.297523	TRUE	Promoter (<=1kb)	chr4	133532542	133546027	13486	-	18221	uc012dmm.1	-17	ENSMUSG00000028851	Nudc	nuclear distribution gene C homolog (Aspergillus)
1126	chr4	133546045	133546052	8	*	1.92896e-12	0.38507	0.000773343	0.384369	0.00014636	8.7175e-05	0.00319479	-0.00310761	FALSE	Promoter (<=1kb)	chr4	133532542	133546027	13486	-	18221	uc012dmm.1	-18	ENSMUSG00000028851	Nudc	nuclear distribution gene C homolog (Aspergillus)
1127	chr4	133546053	133546078	26	*	1.92896e-12	0.38507	0.000773343	0.384369	5.01754e-05	0.278362	0.0057486	0.274429	TRUE	Promoter (<=1kb)	chr4	133532542	133546027	13486	-	18221	uc012dmm.1	-26	ENSMUSG00000028851	Nudc	nuclear distribution gene C homolog (Aspergillus)
1128	chr4	135856075	135856075	1	*	4.08668e-08	0.00484214	3.55577e-05	0.00481043	1.79721e-05	0.277968	0.00717158	0.270796	TRUE	Promoter (<=1kb)	chr4	135856071	135858978	2908	+	14105	uc008vha.2	4	ENSMUSG00000028676	Srsf10	serine/arginine-rich splicing factor 10
1129	chr4	136602369	136602469	101	*	5.88942e-06	0.00380084	5.19359e-05	0.00374891	2.07137e-07	5.15836e-05	0.00394132	-0.00389192	FALSE	Promoter (<=1kb)	chr4	136550533	136602723	52191	-	99982	uc008vig.2	254	ENSMUSG00000036940	Kdm1a	lysine (K)-specific demethylase 1A
1130	chr4	137357391	137357584	194	*	2.68778e-07	0.00510338	4.59759e-05	0.00505741	1.37376e-05	0.00155046	2.70736e-05	0.00151737	TRUE	Promoter (<=1kb)	chr4	137319696	137357759	38064	-	12540	uc008viw.3	175	ENSMUSG00000006699	Cdc42	cell division cycle 42
1131	chr4	137357600	137357616	17	*	2.81139e-11	0.384708	0.00106736	0.38364	0.000977901	0.020817	0.315159	-0.294342	FALSE	Promoter (<=1kb)	chr4	137319696	137357759	38064	-	12540	uc008viw.3	143	ENSMUSG00000006699	Cdc42	cell division cycle 42
1132	chr4	140702026	140702026	1	*	0.00416774	0.00864204	0.180534	-0.171892	0.00427019	0.000745577	0.0170696	-0.016324	TRUE	Promoter (<=1kb)	chr4	140701473	140723220	21748	+	108911	uc008vna.2	553	ENSMUSG00000040945	Rcc2	regulator of chromosome condensation 2
1133	chr4	140702028	140702033	6	*	0.00416774	0.00864204	0.180534	-0.171892	7.70386e-07	0.335391	0.0053689	0.329822	FALSE	Promoter (<=1kb)	chr4	140701473	140723220	21748	+	108911	uc008vna.2	560	ENSMUSG00000040945	Rcc2	regulator of chromosome condensation 2
1134	chr4	140702304	140702321	18	*	2.77639e-06	0.00160013	3.35867e-05	0.00156358	2.62185e-09	0.325117	0.00197693	0.32314	TRUE	Promoter (<=1kb)	chr4	140701473	140723220	21748	+	108911	uc008vna.2	848	ENSMUSG00000040945	Rcc2	regulator of chromosome condensation 2
1135	chr4	140702387	140702482	96	*	2.77639e-06	0.00160013	3.35867e-05	0.00156358	4.72324e-05	0.000387777	0.0113579	-0.0110304	FALSE	Promoter (1-2kb)	chr4	140701473	140723220	21748	+	108911	uc008vna.2	1009	ENSMUSG00000040945	Rcc2	regulator of chromosome condensation 2
1136	chr4	141139411	141139492	82	*	2.31056e-09	2.97547e-05	0.00572852	-0.00569877	1.74446e-07	0.00344832	0.328799	-0.325493	TRUE	Promoter (<=1kb)	chr4	141112978	141139796	26819	-	213491	uc008vnw.2	304	ENSMUSG00000040842	Szrd1	SUZ RNA binding domain containing 1
1137	chr4	141139493	141139518	26	*	0.000110837	0.00212715	5.89862e-05	0.00206816	6.09611e-07	0.00325042	3.06541e-05	0.00321977	TRUE	Promoter (<=1kb)	chr4	141112978	141139796	26819	-	213491	uc008vnw.2	278	ENSMUSG00000040842	Szrd1	SUZ RNA binding domain containing 1
1138	chr4	141139519	141139519	1	*	0.000110837	0.00212715	5.89862e-05	0.00206816	5.38353e-08	0.0030294	0.341809	-0.338779	FALSE	Promoter (<=1kb)	chr4	141112978	141139796	26819	-	213491	uc008vnw.2	277	ENSMUSG00000040842	Szrd1	SUZ RNA binding domain containing 1
1139	chr4	141139520	141139551	32	*	0.000110837	0.00212715	5.89862e-05	0.00206816	1.01742e-07	0.00439314	2.65241e-05	0.00436662	TRUE	Promoter (<=1kb)	chr4	141112978	141139796	26819	-	213491	uc008vnw.2	245	ENSMUSG00000040842	Szrd1	SUZ RNA binding domain containing 1
1140	chr4	141664109	141664174	66	*	0.000186777	3.47133e-05	0.00121029	-0.00117563	1.31415e-05	2.37722e-05	0.00111214	-0.00108838	TRUE	Promoter (<=1kb)	chr4	141625734	141664127	38394	-	69582	uc008vpa.2	0	ENSMUSG00000028917	Plekhm2	pleckstrin homology domain containing, family M (with RUN domain) member 2
1141	chr4	141790347	141790350	4	*	1.93353e-07	3.56997e-05	0.0027106	-0.0026749	0.00195898	0.000425231	0.00839538	-0.00797015	TRUE	Promoter (<=1kb)	chr4	141761998	141790644	28647	-	214063	uc008vpf.1	294	ENSMUSG00000040697	Dnajc16	DnaJ (Hsp40) homolog, subfamily C, member 16
1142	chr4	141790501	141790577	77	*	0.000499915	0.0111071	0.284107	-0.273	6.64741e-06	0.334815	0.0100359	0.32471	FALSE	Promoter (<=1kb)	chr4	141761998	141790644	28647	-	214063	uc008vpf.1	67	ENSMUSG00000040697	Dnajc16	DnaJ (Hsp40) homolog, subfamily C, member 16
1143	chr4	148151838	148151893	56	*	8.93372e-06	3.24369e-05	0.00222194	-0.00219007	6.75381e-05	0.000390822	2.32643e-05	0.000367558	FALSE	Promoter (<=1kb)	chr4	148145716	148151925	6210	-	50762	uc008vud.2	32	ENSMUSG00000055401	Fbxo6	F-box protein 6
1144	chr4	149426315	149426381	67	*	1.45869e-10	0.38245	0.00108636	0.381154	2.09636e-10	0.00152477	0.343183	-0.341658	FALSE	Promoter (<=1kb)	chr4	149328416	149426631	98216	-	63958	uc012dpr.1	250	ENSMUSG00000028960	Ube4b	ubiquitination factor E4B
1145	chr4	150008848	150009001	154	*	2.375e-05	0.000939728	3.19142e-05	0.000907814	2.00597e-08	2.67157e-05	0.00214679	-0.00212008	FALSE	Promoter (<=1kb)	chr4	149979474	150009023	29550	-	100198	uc008vxi.2	22	ENSMUSG00000028980	H6pd	hexose-6-phosphate dehydrogenase (glucose 1-dehydrogenase)
1146	chr4	150281556	150281589	34	*	1.91646e-08	2.96121e-05	0.00169873	-0.00166911	1.89254e-10	2.3261e-05	0.00220523	-0.00218197	TRUE	Promoter (<=1kb)	chr4	150281916	150621966	340051	+	68703	uc008vxr.1	-360	ENSMUSG00000039852	Rere	arginine glutamic acid dipeptide (RE) repeats
1147	chr4	151057644	151057669	26	*	4.84831e-07	3.05007e-05	0.00167873	-0.00164823	4.62565e-15	0.000254842	0.346642	-0.346387	TRUE	Promoter (<=1kb)	chr4	151047305	151057953	10649	-	22319	uc008vyj.1	284	ENSMUSG00000028955	Vamp3	vesicle-associated membrane protein 3
1148	chr4	151058053	151058112	60	*	0.000108737	0.00148398	5.50291e-05	0.0014332	2.52959e-05	0.0106838	0.322576	-0.311893	FALSE	Promoter (<=1kb)	chr4	151047305	151057953	10649	-	22319	uc008vyj.1	-100	ENSMUSG00000028955	Vamp3	vesicle-associated membrane protein 3
1149	chr4	151995157	151995158	2	*	9.50448e-06	0.00122429	3.15975e-05	0.00119269	0.000839902	0.00016879	0.00475601	-0.00458722	FALSE	Promoter (1-2kb)	chr4	151989631	151996179	6549	-	230936	uc008vyx.2	1021	ENSMUSG00000047777	Phf13	PHD finger protein 13
1150	chr4	151995164	151995175	12	*	9.50448e-06	0.00122429	3.15975e-05	0.00119269	9.47366e-10	0.340781	0.0015294	0.339251	TRUE	Promoter (1-2kb)	chr4	151989631	151996179	6549	-	230936	uc008vyx.2	1004	ENSMUSG00000047777	Phf13	PHD finger protein 13
1151	chr4	151995176	151995176	1	*	9.50448e-06	0.00122429	3.15975e-05	0.00119269	4.40225e-06	2.7928e-05	0.00139564	-0.00136771	FALSE	Promoter (1-2kb)	chr4	151989631	151996179	6549	-	230936	uc008vyx.2	1003	ENSMUSG00000047777	Phf13	PHD finger protein 13
1152	chr4	151995178	151995179	2	*	9.50448e-06	0.00122429	3.15975e-05	0.00119269	4.67657e-10	0.34011	0.00134505	0.338765	TRUE	Promoter (<=1kb)	chr4	151989631	151996179	6549	-	230936	uc008vyx.2	1000	ENSMUSG00000047777	Phf13	PHD finger protein 13
1153	chr4	151995180	151995180	1	*	9.50448e-06	0.00122429	3.15975e-05	0.00119269	5.73891e-06	2.81972e-05	0.00131781	-0.00128961	FALSE	Promoter (<=1kb)	chr4	151989631	151996179	6549	-	230936	uc008vyx.2	999	ENSMUSG00000047777	Phf13	PHD finger protein 13
1154	chr4	151995181	151995195	15	*	9.50448e-06	0.00122429	3.15975e-05	0.00119269	3.38289e-10	0.339506	0.00126444	0.338242	TRUE	Promoter (<=1kb)	chr4	151989631	151996179	6549	-	230936	uc008vyx.2	984	ENSMUSG00000047777	Phf13	PHD finger protein 13
1155	chr4	151995196	151995196	1	*	9.50448e-06	0.00122429	3.15975e-05	0.00119269	1.65208e-05	2.94429e-05	0.00105442	-0.00102498	FALSE	Promoter (<=1kb)	chr4	151989631	151996179	6549	-	230936	uc008vyx.2	983	ENSMUSG00000047777	Phf13	PHD finger protein 13
1156	chr4	151995207	151995349	143	*	9.50448e-06	0.00122429	3.15975e-05	0.00119269	7.34965e-11	0.344449	0.00112816	0.343305	TRUE	Promoter (<=1kb)	chr4	151989631	151996179	6549	-	230936	uc008vyx.2	830	ENSMUSG00000047777	Phf13	PHD finger protein 13
1157	chr4	151995392	151995437	46	*	3.36076e-06	0.00283125	5.03267e-05	0.00278093	2.98103e-08	2.95522e-05	0.00437435	-0.0043448	FALSE	Promoter (<=1kb)	chr4	151989631	151996179	6549	-	230936	uc008vyx.2	742	ENSMUSG00000047777	Phf13	PHD finger protein 13
1158	chr4	152177716	152177829	114	*	2.06858e-06	0.00153424	3.806e-05	0.00149618	7.21367e-07	2.3929e-05	0.0010636	-0.00103829	FALSE	Promoter (<=1kb)	chr4	152178100	152271855	93756	+	70025	uc008vzx.2	-384	ENSMUSG00000028937	Acot7	acyl-CoA thioesterase 7
1159	chr4	152177716	152177829	114	*	1.36267e-05	3.2274e-05	0.00181929	-0.00178702	7.21367e-07	2.3929e-05	0.0010636	-0.00103829	TRUE	Promoter (<=1kb)	chr4	152178100	152271855	93756	+	70025	uc008vzx.2	-384	ENSMUSG00000028937	Acot7	acyl-CoA thioesterase 7
1160	chr4	155250112	155250163	52	*	4.56506e-10	0.377133	0.00145102	0.375682	0.00035728	0.0209002	0.317464	-0.29628	FALSE	Promoter (<=1kb)	chr4	155249966	155256687	6722	+	67513	uc008wda.2	197	ENSMUSG00000073684	Faap20	Fanconi anemia core complex associated protein 20
1161	chr4	155624647	155624667	21	*	0.000220904	3.00975e-05	0.000528314	-0.000498177	3.96753e-06	0.00937137	0.345747	-0.336376	TRUE	Promoter (<=1kb)	chr4	155608297	155624755	16459	-	100502734	uc008wdy.2	88	ENSMUSG00000086682	Gm16023	predicted gene 16023
1162	chr4	155625031	155625105	75	*	5.21988e-08	0.380846	0.00416364	0.376682	4.68192e-08	0.00490065	3.38379e-05	0.00486681	TRUE	Promoter (<=1kb)	chr4	155624883	155649932	25050	+	12537	uc008wec.1	222	ENSMUSG00000029062	Cdk11b	cyclin-dependent kinase 11B
1163	chr4	155625031	155625105	75	*	3.69429e-08	4.61899e-05	0.00870502	-0.00865883	4.68192e-08	0.00490065	3.38379e-05	0.00486681	FALSE	Promoter (<=1kb)	chr4	155624883	155649932	25050	+	12537	uc008wec.1	222	ENSMUSG00000029062	Cdk11b	cyclin-dependent kinase 11B
1164	chr4	155625031	155625105	75	*	5.32636e-06	0.373094	0.0100409	0.365714	4.68192e-08	0.00490065	3.38379e-05	0.00486681	TRUE	Promoter (<=1kb)	chr4	155624883	155649932	25050	+	12537	uc008wec.1	222	ENSMUSG00000029062	Cdk11b	cyclin-dependent kinase 11B
1165	chr4	155812354	155812520	167	*	0.000241248	0.000174052	0.0125374	-0.0123634	2.72921e-07	0.0026237	0.305799	-0.302344	TRUE	Promoter (<=1kb)	chr4	155812489	155815858	3370	+	56036	uc008wev.1	0	ENSMUSG00000029068	Ccnl2	cyclin L2
1166	chr4	155812354	155812520	167	*	1.04213e-07	0.383936	0.00412631	0.37981	2.72921e-07	0.0026237	0.305799	-0.302344	FALSE	Promoter (<=1kb)	chr4	155812489	155815858	3370	+	56036	uc008wev.1	0	ENSMUSG00000029068	Ccnl2	cyclin L2
1167	chr4	155812354	155812520	167	*	7.96888e-07	3.25764e-05	0.00534233	-0.00530976	2.72921e-07	0.0026237	0.305799	-0.302344	TRUE	Promoter (<=1kb)	chr4	155812489	155815858	3370	+	56036	uc008wev.1	0	ENSMUSG00000029068	Ccnl2	cyclin L2
1168	chr4	155812354	155812520	167	*	4.42066e-07	0.383875	0.00540198	0.378463	2.72921e-07	0.0026237	0.305799	-0.302344	FALSE	Promoter (<=1kb)	chr4	155812489	155815858	3370	+	56036	uc008wev.1	0	ENSMUSG00000029068	Ccnl2	cyclin L2
1169	chr4	155831950	155832040	91	*	4.08786e-05	0.00357143	6.77619e-05	0.00350367	2.25488e-06	2.84926e-05	0.00193726	-0.00190877	FALSE	Promoter (<=1kb)	chr4	155831269	155833098	1830	+	66077	uc008wey.2	771	ENSMUSG00000065990	Aurkaip1	aurora kinase A interacting protein 1
1170	chr4	156197270	156197286	17	*	1.12569e-07	0.380019	0.00340826	0.376944	1.13648e-08	0.331013	0.00182664	0.329186	TRUE	Promoter (<=1kb)	chr4	156165290	156197488	32199	-	11603	uc008wgf.2	202	ENSMUSG00000041936	Agrn	agrin
1171	chr4	156197287	156197287	1	*	1.12569e-07	0.380019	0.00340826	0.376944	4.03375e-05	3.68533e-05	0.00184111	-0.00180426	FALSE	Promoter (<=1kb)	chr4	156165290	156197488	32199	-	11603	uc008wgf.2	201	ENSMUSG00000041936	Agrn	agrin
1172	chr4	156197297	156197299	3	*	1.12569e-07	0.380019	0.00340826	0.376944	5.01238e-09	0.329549	0.00155938	0.328003	TRUE	Promoter (<=1kb)	chr4	156165290	156197488	32199	-	11603	uc008wgf.2	189	ENSMUSG00000041936	Agrn	agrin
1173	chr4	156197300	156197300	1	*	1.12569e-07	0.380019	0.00340826	0.376944	6.91181e-05	3.6775e-05	0.00152156	-0.00148479	FALSE	Promoter (<=1kb)	chr4	156165290	156197488	32199	-	11603	uc008wgf.2	188	ENSMUSG00000041936	Agrn	agrin
1174	chr4	156197302	156197315	14	*	1.12569e-07	0.380019	0.00340826	0.376944	2.82133e-09	0.326396	0.00137012	0.325026	TRUE	Promoter (<=1kb)	chr4	156165290	156197488	32199	-	11603	uc008wgf.2	173	ENSMUSG00000041936	Agrn	agrin
1175	chr4	156197320	156197320	1	*	1.12569e-07	0.380019	0.00340826	0.376944	0.0002276	4.34744e-05	0.00133669	-0.00129321	FALSE	Promoter (<=1kb)	chr4	156165290	156197488	32199	-	11603	uc008wgf.2	168	ENSMUSG00000041936	Agrn	agrin
1176	chr4	156197824	156197985	162	*	3.25531e-05	0.00109323	3.18543e-05	0.00106138	5.87846e-10	2.95766e-05	0.00501584	-0.00498447	FALSE	Promoter (<=1kb)	chr4	156165290	156197488	32199	-	11603	uc008wgf.2	-336	ENSMUSG00000041936	Agrn	agrin
1177	chr5	4104391	4104453	63	*	1.20277e-11	3.69082e-05	0.00561848	-0.00558095	4.12035e-05	3.72709e-05	0.00151623	-0.00147896	TRUE	Promoter (<=1kb)	chr5	4080674	4104697	24024	-	13121	uc008wie.1	244	ENSMUSG00000001467	Cyp51	cytochrome P450, family 51
1178	chr5	8422692	8422772	81	*	3.15268e-08	8.67412e-05	0.00990627	-0.00981214	5.49358e-11	0.328669	0.00109819	0.32753	FALSE	Promoter (<=1kb)	chr5	8396969	8422716	25748	-	27214	uc008wkc.2	0	ENSMUSG00000002297	Dbf4	DBF4 homolog (S. cerevisiae)
1179	chr5	21186444	21186491	48	*	3.0311e-05	0.000753483	3.05709e-05	0.000722912	7.68938e-12	0.342686	0.000709804	0.342177	TRUE	Promoter (<=1kb)	chr5	21186267	21259766	73500	+	212167	uc008woi.1	224	ENSMUSG00000039934	Gsap	gamma-secretase activating protein
1180	chr5	21737145	21737220	76	*	2.01621e-13	0.384744	0.000528032	0.384216	4.20564e-07	0.00175978	2.79993e-05	0.00173178	TRUE	Promoter (<=1kb)	chr5	21737160	21757152	19993	+	73078	uc008wox.1	0	ENSMUSG00000029017	Pmpcb	peptidase (mitochondrial processing) beta
1181	chr5	23433870	23433971	102	*	1.79117e-10	0.00571941	4.64159e-05	0.005673	6.13893e-07	0.00597992	0.339448	-0.333468	FALSE	Promoter (<=1kb)	chr5	23431808	23434353	2546	-	269630	uc008wpy.2	382	ENSMUSG00000073147	5031425E22Rik	RIKEN cDNA 5031425E22 gene
1182	chr5	23434858	23434918	61	*	2.0891e-09	0.0193763	9.24237e-05	0.0192836	8.31635e-07	0.00560165	0.339181	-0.333579	FALSE	Promoter (<=1kb)	chr5	23434429	23486400	51972	+	69188	uc008wpz.2	489	ENSMUSG00000029004	Kmt2e	lysine (K)-specific methyltransferase 2E
1183	chr5	23783264	23783365	102	*	4.85221e-10	0.43536	0.00141265	0.433948	8.06402e-09	0.000298325	0.0202815	-0.0199832	FALSE	Promoter (<=1kb)	chr5	23740165	23783711	43547	-	78697	uc008wqo.2	346	ENSMUSG00000057541	Pus7	pseudouridylate synthase 7 homolog (S. cerevisiae)
1184	chr5	24451881	24451993	113	*	1.00239e-07	3.00375e-05	0.00205265	-0.00202261	3.59316e-07	0.320934	0.00366302	0.317196	FALSE	Promoter (<=1kb)	chr5	24452177	24483184	31008	+	213990	uc008wru.2	-296	ENSMUSG00000023353	Agap3	ArfGAP with GTPase domain, ankyrin repeat and PH domain 3
1185	chr5	24602258	24602295	38	*	9.32204e-08	0.37819	0.00651139	0.371679	1.43281e-07	0.0031957	0.305892	-0.302696	FALSE	Promoter (<=1kb)	chr5	24592622	24602002	9381	-	66993	uc008wsd.1	-256	ENSMUSG00000028949	Smarcd3	SWI/SNF related, matrix associated, actin dependent regulator of chromatin, subfamily d, member 3
1186	chr5	25530101	25530131	31	*	0.000192205	0.113599	0.00221642	0.111383	5.25811e-07	0.336899	0.00659929	0.3303	TRUE	Promoter (<=1kb)	chr5	25530018	25531466	1449	+	73571	uc012dtm.1	113	ENSMUSG00000101856	1700096K18Rik	RIKEN cDNA 1700096K18 gene
1187	chr5	25530101	25530131	31	*	0.00019253	3.05279e-05	0.000616456	-0.000585928	5.25811e-07	0.336899	0.00659929	0.3303	FALSE	Promoter (<=1kb)	chr5	25530018	25531466	1449	+	73571	uc012dtm.1	113	ENSMUSG00000101856	1700096K18Rik	RIKEN cDNA 1700096K18 gene
1188	chr5	25530101	25530131	31	*	1.17599e-13	0.385042	0.000503574	0.384538	5.25811e-07	0.336899	0.00659929	0.3303	TRUE	Promoter (<=1kb)	chr5	25530018	25531466	1449	+	73571	uc012dtm.1	113	ENSMUSG00000101856	1700096K18Rik	RIKEN cDNA 1700096K18 gene
1189	chr5	29434858	29435073	216	*	9.32141e-08	0.00527612	5.59001e-05	0.00516279	1.54008e-05	0.01173	0.312307	-0.300109	FALSE	Promoter (<=1kb)	chr5	29434667	29452169	17503	+	433864	uc008wuj.1	406	ENSMUSG00000001569	Nom1	nucleolar protein with MIF4G domain 1
1190	chr5	29434858	29435073	216	*	0.000635106	0.00247584	0.185401	-0.182926	1.54008e-05	0.01173	0.312307	-0.300109	TRUE	Promoter (<=1kb)	chr5	29434667	29452169	17503	+	433864	uc008wuj.1	406	ENSMUSG00000001569	Nom1	nucleolar protein with MIF4G domain 1
1191	chr5	30950052	30950098	47	*	1.6297e-08	0.382963	0.00258369	0.380379	2.32705e-07	0.305602	0.0021302	0.303472	TRUE	Promoter (<=1kb)	chr5	30950066	30955095	5030	+	57742	uc008wwp.1	0	ENSMUSG00000006638	Abhd1	abhydrolase domain containing 1
1192	chr5	31241134	31241190	57	*	8.10279e-11	0.382425	0.00120349	0.381281	2.853e-05	0.00056292	2.33303e-05	0.000539182	TRUE	Promoter (<=1kb)	chr5	31240918	31244559	3642	+	192292	uc008wxs.1	272	ENSMUSG00000029148	Nrbp1	nuclear receptor binding protein 1
1193	chr5	33658084	33658156	73	*	0.000111357	0.0144101	0.000362224	0.0140478	2.18002e-07	0.00019226	0.0191216	-0.0189293	FALSE	Promoter (<=1kb)	chr5	33658147	33664611	6465	+	21335	uc008xba.1	0	ENSMUSG00000037313	Tacc3	transforming, acidic coiled-coil containing protein 3
1194	chr5	33821441	33821508	68	*	4.34769e-07	3.14221e-05	0.00171335	-0.00168193	2.19311e-08	0.323154	0.00309109	0.320063	FALSE	Promoter (<=1kb)	chr5	33821659	33870536	48878	+	107823	uc012duu.1	-218	ENSMUSG00000057406	Whsc1	Wolf-Hirschhorn syndrome candidate 1 (human)
1195	chr5	43781768	43781922	155	*	2.57846e-08	0.383418	0.00377534	0.379431	6.93701e-07	2.97355e-05	0.00176929	-0.00173956	FALSE	Promoter (<=1kb)	chr5	43744618	43782149	37532	-	242960	uc008xhu.2	227	ENSMUSG00000039753	Fbxl5	F-box and leucine-rich repeat protein 5
1196	chr5	45450310	45450310	1	*	5.3786e-07	0.00369386	4.26884e-05	0.00365117	0.000748835	0.000203453	0.00434576	-0.00414231	FALSE	Promoter (<=1kb)	chr5	45434032	45450229	16198	-	110391	uc008xix.2	-81	ENSMUSG00000015806	Qdpr	quinoid dihydropteridine reductase
1197	chr5	52190137	52190214	78	*	4.47817e-13	0.38493	0.000596636	0.384334	2.30683e-07	2.35197e-05	0.00109171	-0.00106819	FALSE	Promoter (<=1kb)	chr5	52150203	52190546	40344	-	13204	uc008xkf.2	332	ENSMUSG00000029169	Dhx15	DEAH (Asp-Glu-Ala-His) box polypeptide 15
1198	chr5	52190511	52190561	51	*	1.80962e-05	0.000915343	3.0897e-05	0.000884371	5.72964e-07	0.00461659	0.339859	-0.335237	FALSE	Promoter (<=1kb)	chr5	52150203	52190546	40344	-	13204	uc008xkf.2	0	ENSMUSG00000029169	Dhx15	DEAH (Asp-Glu-Ala-His) box polypeptide 15
1199	chr5	53213436	53213542	107	*	1.14635e-12	0.384785	0.000710049	0.384066	1.38356e-08	0.342647	0.00277672	0.339782	TRUE	Promoter (<=1kb)	chr5	53107083	53213452	106370	-	231238	uc008xlc.1	0	ENSMUSG00000029189	Sel1l3	sel-1 suppressor of lin-12-like 3 (C. elegans)
1200	chr5	53213610	53213657	48	*	2.22875e-05	0.00145519	4.50768e-05	0.00141012	4.22561e-05	2.38e-05	0.000499911	-0.000476111	FALSE	Promoter (<=1kb)	chr5	53107083	53213452	106370	-	231238	uc008xlc.1	-158	ENSMUSG00000029189	Sel1l3	sel-1 suppressor of lin-12-like 3 (C. elegans)
1201	chr5	65763558	65763681	124	*	1.44165e-05	4.11997e-05	0.00251542	-0.00247137	0.000188616	4.55316e-05	0.00104253	-0.00099976	TRUE	Promoter (<=1kb)	chr5	65763521	65826784	63264	+	333789	uc008xoa.1	160	ENSMUSG00000037795	N4bp2	NEDD4 binding protein 2
1202	chr5	71701092	71701191	100	*	8.61883e-05	4.79439e-05	0.00221424	-0.00217238	8.77612e-08	0.00256759	0.252195	-0.250812	TRUE	Promoter (1-2kb)	chr5	71700016	72137244	437229	+	14400	uc008xrb.1	1175	ENSMUSG00000029212	Gabrb1	gamma-aminobutyric acid (GABA) A receptor, subunit beta 1
1203	chr5	76304815	76304857	43	*	0.000125652	0.000755256	3.43485e-05	0.000720908	0.000323993	0.00012215	0.00449455	-0.00436972	FALSE	Promoter (<=1kb)	chr5	76209868	76304792	94925	-	12753	uc008xus.2	-23	ENSMUSG00000029238	Clock	circadian locomotor output cycles kaput
1204	chr5	88721477	88721590	114	*	1.32192e-06	0.360016	0.00475375	0.346339	7.04123e-06	0.00231547	3.57285e-05	0.00228132	TRUE	Promoter (<=1kb)	chr5	88720871	88747350	26480	+	68473	uc008yad.1	719	ENSMUSG00000006262	Mob1b	MOB kinase activator 1B
1205	chr5	90223760	90223820	61	*	5.13643e-06	3.56451e-05	0.00187263	-0.00183904	1.04154e-08	3.11939e-05	0.0125524	-0.0125212	TRUE	Promoter (<=1kb)	chr5	90214725	90223996	9272	-	231430	uc008yar.2	176	ENSMUSG00000035505	Cox18	cytochrome c oxidase assembly protein 18
1206	chr5	90365906	90366197	292	*	1.06678e-05	0.000932482	3.0309e-05	0.000902047	6.64925e-12	0.344683	0.000850951	0.343873	TRUE	Promoter (<=1kb)	chr5	90227166	90366185	139020	-	81702	uc029vje.1	0	ENSMUSG00000055204	Ankrd17	ankyrin repeat domain 17
1207	chr5	92083089	92083155	67	*	1.0172e-12	0.385054	0.000709031	0.384345	6.67483e-10	0.00149978	0.340701	-0.339201	FALSE	Promoter (<=1kb)	chr5	92052145	92082917	30773	-	23881	uc008ycg.2	-172	ENSMUSG00000029405	G3bp2	GTPase activating protein (SH3 domain) binding protein 2
1208	chr5	92083089	92083155	67	*	2.67749e-05	3.13865e-05	0.00102152	-0.000990133	6.67483e-10	0.00149978	0.340701	-0.339201	TRUE	Promoter (<=1kb)	chr5	92052145	92082917	30773	-	23881	uc008ycg.2	-172	ENSMUSG00000029405	G3bp2	GTPase activating protein (SH3 domain) binding protein 2
1209	chr5	98031105	98031137	33	*	2.13074e-07	0.00253377	3.36452e-05	0.00250012	3.37988e-05	0.00431042	0.220068	-0.215758	FALSE	Promoter (<=1kb)	chr5	97884688	98030962	146275	-	71914	uc008yga.1	-143	ENSMUSG00000029338	Antxr2	anthrax toxin receptor 2
1210	chr5	98031354	98031400	47	*	0.000188249	0.00555138	0.000124637	0.00542675	3.23582e-07	0.00373909	0.313976	-0.310237	FALSE	Promoter (<=1kb)	chr5	97884688	98030962	146275	-	71914	uc008yga.1	-392	ENSMUSG00000029338	Antxr2	anthrax toxin receptor 2
1211	chr5	100798307	100798307	1	*	4.64495e-06	3.26004e-05	0.00288836	-0.00285576	1.65528e-15	0.000217721	0.34691	-0.346692	TRUE	Promoter (<=1kb)	chr5	100762148	100798600	36453	-	191578	uc008yhz.1	293	ENSMUSG00000035266	Helq	helicase, POLQ-like
1212	chr5	100798479	100798592	114	*	0.000503294	0.00082678	0.0535598	-0.052733	2.94107e-06	0.317852	0.00681125	0.311077	FALSE	Promoter (<=1kb)	chr5	100762148	100798600	36453	-	191578	uc008yhz.1	8	ENSMUSG00000035266	Helq	helicase, POLQ-like
1213	chr5	108268764	108268884	121	*	4.8713e-06	0.000977387	3.45167e-05	0.00094287	1.04705e-09	0.339952	0.00210316	0.337461	TRUE	Promoter (<=1kb)	chr5	108268897	108280521	11625	+	13486	uc008ynt.1	-133	ENSMUSG00000029265	Dr1	down-regulator of transcription 1
1214	chr5	109559021	109559065	45	*	1.5057e-12	0.384494	0.000659338	0.383835	7.33034e-12	0.344211	0.000706191	0.343504	TRUE	Promoter (<=1kb)	chr5	109554709	109558993	4285	-	57914	uc008ypg.2	-28	ENSMUSG00000033467	Crlf2	cytokine receptor-like factor 2
1215	chr5	113993935	113994022	88	*	0.000124481	0.00111743	4.67529e-05	0.00107258	3.35012e-11	0.00110227	0.341551	-0.340449	FALSE	Promoter (<=1kb)	chr5	113942219	113993757	51539	-	231637	uc008yyy.1	-178	ENSMUSG00000042121	Ssh1	slingshot homolog 1 (Drosophila)
1216	chr5	114130917	114130985	69	*	2.4093e-12	0.38454	0.000764525	0.383775	1.19301e-08	0.336629	0.00249361	0.334136	TRUE	Promoter (<=1kb)	chr5	114131156	114139321	8166	+	22256	uc008yzg.1	-239	ENSMUSG00000029591	Ung	uracil DNA glycosylase
1217	chr5	114380774	114381014	241	*	2.73123e-05	0.00262301	6.51089e-05	0.00256357	7.38357e-06	0.0036573	0.266636	-0.26152	FALSE	Promoter (<=1kb)	chr5	114380607	114421166	40560	+	117146	uc008yzn.1	407	ENSMUSG00000029577	Ube3b	ubiquitin protein ligase E3B
1218	chr5	114942326	114942330	5	*	2.31421e-06	0.00265323	3.67157e-05	0.00261758	1.44433e-12	0.344131	0.000621615	0.343509	TRUE	Promoter (<=1kb)	chr5	114942202	114948540	6339	+	72357	uc008zcy.1	128	ENSMUSG00000029559	2210016L21Rik	RIKEN cDNA 2210016L21 gene
1219	chr5	115280101	115280112	12	*	1.07281e-10	0.382834	0.0016573	0.381177	5.45369e-19	2.78046e-05	0.00389454	-0.00386674	FALSE	Promoter (<=1kb)	chr5	115279702	115296972	17271	+	52064	uc008zdo.1	410	ENSMUSG00000041733	Coq5	coenzyme Q5 homolog, methyltransferase (yeast)
1220	chr5	115559889	115559907	19	*	0.000139299	0.00165959	5.5663e-05	0.00160393	4.98011e-08	0.0028198	0.321881	-0.319061	FALSE	Promoter (<=1kb)	chr5	115559467	115563729	4263	+	11837	uc008zed.2	440	ENSMUSG00000067274	Rplp0	ribosomal protein, large, P0
1221	chr5	115565203	115565353	151	*	1.11622e-05	3.28363e-05	0.00174754	-0.0017134	1.25182e-09	0.00150604	0.339986	-0.338748	TRUE	Promoter (<=1kb)	chr5	115565263	115584238	18976	+	231659	uc008zee.1	0	ENSMUSG00000041638	Gcn1l1	GCN1 general control of amino-acid synthesis 1-like 1 (yeast)
1222	chr5	121837298	121837298	1	*	4.65199e-05	4.07109e-05	0.00209198	-0.00205127	7.63183e-08	0.000353714	0.108282	-0.107929	TRUE	Promoter (<=1kb)	chr5	121817215	121836801	19587	-	16923	uc008zkg.1	-497	ENSMUSG00000042594	Sh2b3	SH2B adaptor protein 3
1223	chr5	122614534	122614540	7	*	2.54321e-09	0.382354	0.00203055	0.380323	2.2578e-05	0.005998	0.285258	-0.27926	FALSE	Promoter (<=1kb)	chr5	122550204	122614518	64315	-	12589	uc008zlm.2	-16	ENSMUSG00000029469	Ift81	intraflagellar transport 81
1224	chr5	122820797	122820932	136	*	0.000199441	4.82104e-05	0.00160277	-0.00155456	9.52569e-09	0.335332	0.00223606	0.332644	FALSE	Promoter (<=1kb)	chr5	122787461	122821342	33882	-	59008	uc008zmf.2	410	ENSMUSG00000029472	Anapc5	anaphase-promoting complex subunit 5
1225	chr5	123572733	123572891	159	*	5.43451e-07	0.375195	0.00624658	0.368949	1.27847e-05	5.37611e-05	0.00265549	-0.00259228	FALSE	Promoter (<=1kb)	chr5	123528760	123573015	44256	-	77573	uc008znz.2	124	ENSMUSG00000029434	Vps33a	vacuolar protein sorting 33A (yeast)
1226	chr5	123907223	123907330	108	*	0.000204184	0.00066879	0.0373312	-0.0361456	5.25329e-08	2.31595e-05	0.00146866	-0.00144571	TRUE	Promoter (<=1kb)	chr5	123907275	123928832	21558	+	68184	uc008zor.1	0	ENSMUSG00000023106	Denr	density-regulated protein
1227	chr5	124445851	124445906	56	*	0.000167072	0.000840397	4.0888e-05	0.000799509	8.2845e-13	0.344036	0.000571562	0.343465	TRUE	Promoter (<=1kb)	chr5	124445499	124462307	16809	+	67956	uc008zpw.1	407	ENSMUSG00000049327	Setd8	SET domain containing (lysine methyltransferase) 8
1228	chr5	124446024	124446062	39	*	0.000195551	0.00363992	0.189806	-0.186166	0.000855995	0.000530339	0.00887649	-0.00834615	TRUE	Promoter (<=1kb)	chr5	124445499	124462307	16809	+	67956	uc008zpw.1	563	ENSMUSG00000049327	Setd8	SET domain containing (lysine methyltransferase) 8
1229	chr5	124541018	124541399	382	*	6.41693e-05	3.27193e-05	0.00120594	-0.00117322	4.44501e-08	0.334737	0.00287534	0.333445	FALSE	Promoter (<=1kb)	chr5	124540791	124550503	9713	+	56334	uc008zqa.1	608	ENSMUSG00000029390	Tmed2	transmembrane emp24 domain trafficking protein 2
1230	chr5	124541018	124541399	382	*	6.37768e-14	0.384445	0.000466595	0.383978	4.44501e-08	0.334737	0.00287534	0.333445	TRUE	Promoter (<=1kb)	chr5	124540791	124550503	9713	+	56334	uc008zqa.1	608	ENSMUSG00000029390	Tmed2	transmembrane emp24 domain trafficking protein 2
1231	chr5	124541018	124541399	382	*	0.000504436	5.64678e-05	0.00191546	-0.00185899	4.44501e-08	0.334737	0.00287534	0.333445	FALSE	Promoter (<=1kb)	chr5	124540791	124550503	9713	+	56334	uc008zqa.1	608	ENSMUSG00000029390	Tmed2	transmembrane emp24 domain trafficking protein 2
1232	chr5	125441384	125441606	223	*	6.4756e-07	3.08315e-05	0.00129999	-0.00126916	4.78527e-06	0.0016025	2.85936e-05	0.00157436	FALSE	Promoter (<=1kb)	chr5	125441568	125460885	19318	+	76809	uc008zrr.1	0	ENSMUSG00000037905	Bri3bp	Bri3 binding protein
1233	chr5	125441384	125441606	223	*	2.69644e-11	0.384467	0.00138219	0.383085	4.78527e-06	0.0016025	2.85936e-05	0.00157436	TRUE	Promoter (<=1kb)	chr5	125441568	125460885	19318	+	76809	uc008zrr.1	0	ENSMUSG00000037905	Bri3bp	Bri3 binding protein
1234	chr5	125441384	125441606	223	*	4.47382e-07	3.22087e-05	0.00171582	-0.00168361	4.78527e-06	0.0016025	2.85936e-05	0.00157436	FALSE	Promoter (<=1kb)	chr5	125441568	125460885	19318	+	76809	uc008zrr.1	0	ENSMUSG00000037905	Bri3bp	Bri3 binding protein
1235	chr5	125441384	125441606	223	*	2.59297e-05	0.186401	0.00347353	0.182928	4.78527e-06	0.0016025	2.85936e-05	0.00157436	TRUE	Promoter (<=1kb)	chr5	125441568	125460885	19318	+	76809	uc008zrr.1	0	ENSMUSG00000037905	Bri3bp	Bri3 binding protein
1236	chr5	125441384	125441606	223	*	3.84478e-07	3.2071e-05	0.00174401	-0.00171194	4.78527e-06	0.0016025	2.85936e-05	0.00157436	FALSE	Promoter (<=1kb)	chr5	125441568	125460885	19318	+	76809	uc008zrr.1	0	ENSMUSG00000037905	Bri3bp	Bri3 binding protein
1237	chr5	125442007	125442139	133	*	0.000657879	0.000252812	3.00481e-05	0.000222764	9.91238e-09	0.335322	0.00247351	0.332011	TRUE	Promoter (<=1kb)	chr5	125441568	125460885	19318	+	76809	uc008zrr.1	571	ENSMUSG00000037905	Bri3bp	Bri3 binding protein
1238	chr5	130079480	130079529	50	*	7.72995e-05	0.00079714	3.50704e-05	0.00076207	6.47168e-10	0.00174752	0.337656	-0.33589	FALSE	Promoter (<=1kb)	chr5	130079370	130135733	56364	+	22021	uc008zud.3	159	ENSMUSG00000034118	Tpst1	protein-tyrosine sulfotransferase 1
1239	chr5	134184230	134184402	173	*	1.3922e-05	3.03446e-05	0.00129603	-0.00126634	1.4587e-10	0.0068902	3.08405e-05	0.00685622	FALSE	Promoter (<=1kb)	chr5	134184038	134197488	13451	+	114674	uc008zvd.1	364	ENSMUSG00000015942	Gtf2ird2	GTF2I repeat domain containing 2
1240	chr5	134314396	134314622	227	*	1.92031e-05	0.000876078	3.0662e-05	0.000845416	1.30252e-08	0.00313096	0.334935	-0.331828	FALSE	Promoter (<=1kb)	chr5	134237832	134314693	76862	-	14886	uc008zvj.3	71	ENSMUSG00000060261	Gtf2i	general transcription factor II I
1241	chr5	135168629	135168652	24	*	3.17225e-09	0.377592	0.0027067	0.374885	0.00181679	0.0198051	0.259207	-0.239402	FALSE	Promoter (<=1kb)	chr5	135168372	135173440	5069	+	12054	uc008zxv.2	280	ENSMUSG00000029681	Bcl7b	B cell CLL/lymphoma 7B
1242	chr5	135689109	135689145	37	*	7.36748e-07	0.00237026	3.49316e-05	0.00233533	4.19047e-07	0.000926438	2.38318e-05	0.000902606	TRUE	Promoter (<=1kb)	chr5	135689214	135735325	46112	+	18984	uc008zyt.1	-105	ENSMUSG00000005514	Por	P450 (cytochrome) oxidoreductase
1243	chr5	135689288	135689421	134	*	0.00181477	3.57565e-05	0.000407655	-0.000371899	9.42667e-06	9.53807e-05	0.00832777	-0.00822022	TRUE	Promoter (<=1kb)	chr5	135689214	135735325	46112	+	18984	uc008zyt.1	207	ENSMUSG00000005514	Por	P450 (cytochrome) oxidoreductase
1244	chr5	135689288	135689421	134	*	0.00388154	0.000148959	2.99675e-05	0.000118992	9.42667e-06	9.53807e-05	0.00832777	-0.00822022	FALSE	Promoter (<=1kb)	chr5	135689214	135735325	46112	+	18984	uc008zyt.1	207	ENSMUSG00000005514	Por	P450 (cytochrome) oxidoreductase
1245	chr5	136567120	136567165	46	*	1.76519e-06	0.00227836	4.04103e-05	0.00223795	6.33281e-07	5.38347e-05	0.00485862	-0.00480479	FALSE	Promoter (<=1kb)	chr5	136248135	136567490	319356	-	13047	uc009aal.2	325	ENSMUSG00000029705	Cux1	cut-like homeobox 1
1246	chr5	137786225	137786271	47	*	2.80604e-06	3.66015e-05	0.00456716	-0.00453056	7.77957e-08	2.96347e-05	0.00333256	-0.00330293	TRUE	Promoter (<=1kb)	chr5	137781906	137786701	4796	-	231803	uc009ady.1	430	ENSMUSG00000029726	Mepce	methylphosphate capping enzyme
1247	chr5	140321362	140321376	15	*	4.80277e-08	0.380269	0.000567194	0.375702	0.00126697	0.261505	0.00968727	0.251817	TRUE	Promoter (<=1kb)	chr5	140008689	140321552	312864	-	17120	uc009ahj.1	176	ENSMUSG00000029554	Mad1l1	MAD1 mitotic arrest deficient 1-like 1
1248	chr5	140321405	140321496	92	*	4.80277e-08	0.380269	0.000567194	0.375702	5.77778e-14	0.000328056	0.345347	-0.345055	FALSE	Promoter (<=1kb)	chr5	140008689	140321552	312864	-	17120	uc009ahj.1	56	ENSMUSG00000029554	Mad1l1	MAD1 mitotic arrest deficient 1-like 1
1249	chr5	143731460	143731593	134	*	7.94766e-11	3.55709e-05	0.00323821	-0.00320264	2.20178e-09	0.00180859	0.314271	-0.312278	TRUE	Promoter (<=1kb)	chr5	143710326	143732280	21955	-	76800	uc009akp.1	687	ENSMUSG00000051306	Usp42	ubiquitin specific peptidase 42
1250	chr5	144255166	144255194	29	*	1.87659e-05	0.00143379	3.73181e-05	0.00139647	0.000418508	0.00518509	0.000133706	0.00505138	TRUE	Promoter (<=1kb)	chr5	144255225	144264573	9349	+	55950	uc009alo.2	-59	ENSMUSG00000047843	Bri3	brain protein I3
1251	chr5	147860643	147860652	10	*	3.35153e-06	0.00240017	3.42558e-05	0.00236389	5.47348e-11	0.344937	0.00128734	0.343817	TRUE	Promoter (<=1kb)	chr5	147860628	147873063	12436	+	66537	uc009aoj.1	24	ENSMUSG00000029649	Pomp	proteasome maturation protein
1252	chr5	149635805	149635999	195	*	1.16645e-08	0.381525	0.00353032	0.375417	3.71548e-06	0.20751	0.000825187	0.191862	TRUE	Promoter (<=1kb)	chr5	149616845	149636315	19471	-	15505	uc009apy.1	316	ENSMUSG00000029657	Hsph1	heat shock 105kDa/110kDa protein 1
1253	chr5	150673584	150673717	134	*	1.18319e-07	0.00360387	3.68576e-05	0.00356705	2.4866e-09	0.331612	0.00163391	0.327495	TRUE	Promoter (<=1kb)	chr5	150673827	150810669	136843	+	100710	uc009auh.2	-243	ENSMUSG00000034021	Pds5b	PDS5, regulator of cohesion maintenance, homolog B (S. cerevisiae)
1254	chr6	4601273	4601273	1	*	9.48293e-06	0.0028048	4.39737e-05	0.00276083	2.59256e-08	0.345002	0.00321678	0.341785	TRUE	Promoter (<=1kb)	chr6	4601066	4643381	42316	+	213819	uc009avo.1	207	ENSMUSG00000015189	Casd1	CAS1 domain containing 1
1255	chr6	4601457	4601515	59	*	9.48293e-06	0.0028048	4.39737e-05	0.00276083	5.02176e-07	0.00430412	0.32153	-0.317253	FALSE	Promoter (<=1kb)	chr6	4601066	4643381	42316	+	213819	uc009avo.1	449	ENSMUSG00000015189	Casd1	CAS1 domain containing 1
1256	chr6	11926169	11926247	79	*	4.68792e-07	5.74686e-05	0.00539043	-0.0053338	1.45146e-10	0.00343741	2.42169e-05	0.00341412	FALSE	Promoter (<=1kb)	chr6	11925881	12008081	82201	+	75725	uc009ayf.1	366	ENSMUSG00000029629	Phf14	PHD finger protein 14
1257	chr6	15721280	15721301	22	*	5.69741e-15	0.385228	0.000338091	0.38489	3.22598e-10	0.340332	0.000959191	0.339373	TRUE	Promoter (<=1kb)	chr6	15721173	15802169	80997	+	16543	uc009azd.2	128	ENSMUSG00000041390	Mdfic	MyoD family inhibitor domain containing
1258	chr6	15721280	15721301	22	*	0.000230867	3.94668e-05	0.00106849	-0.00102928	3.22598e-10	0.340332	0.000959191	0.339373	FALSE	Promoter (<=1kb)	chr6	15721173	15802169	80997	+	16543	uc009azd.2	128	ENSMUSG00000041390	Mdfic	MyoD family inhibitor domain containing
1259	chr6	22875399	22875487	89	*	1.36616e-06	3.11074e-05	0.00118405	-0.00115294	1.24257e-12	0.34285	0.000587424	0.342324	FALSE	Promoter (<=1kb)	chr6	22875502	23004677	129176	+	19283	uc009bba.1	-103	ENSMUSG00000068748	Ptprz1	protein tyrosine phosphatase, receptor type Z, polypeptide 1
1260	chr6	22875399	22875487	89	*	4.51977e-09	0.383039	0.00290473	0.380135	1.24257e-12	0.34285	0.000587424	0.342324	TRUE	Promoter (<=1kb)	chr6	22875502	23004677	129176	+	19283	uc009bba.1	-103	ENSMUSG00000068748	Ptprz1	protein tyrosine phosphatase, receptor type Z, polypeptide 1
1261	chr6	31217660	31217739	80	*	0.000556638	6.63495e-05	0.00193571	-0.00186936	1.722e-05	0.00739856	0.285951	-0.279522	TRUE	Promoter (<=1kb)	chr6	31093563	31218474	124912	-	232685	uc033ioo.1	735	ENSMUSG00000044471	Lincpint	long intergenic non-protein coding RNA, Trp53 induced transcript
1262	chr6	37441824	37441886	63	*	4.65295e-08	0.0015612	3.2617e-05	0.00152868	6.9631e-13	0.000593506	0.341814	-0.341217	FALSE	Promoter (<=1kb)	chr6	37331021	37442148	111128	-	208647	uc009bjf.2	262	ENSMUSG00000038648	Creb3l2	cAMP responsive element binding protein 3-like 2
1263	chr6	37870917	37870971	55	*	1.02182e-05	0.00112638	3.11469e-05	0.00109523	1.50747e-08	0.00177177	0.298612	-0.297232	FALSE	Promoter (<=1kb)	chr6	37870811	37946799	75989	+	21848	uc009bji.1	160	ENSMUSG00000029833	Trim24	tripartite motif-containing 24
1264	chr6	38875933	38876036	104	*	0.000102218	0.000963589	4.03483e-05	0.000922617	3.67485e-07	3.40732e-05	0.00462727	-0.00459393	FALSE	Promoter (<=1kb)	chr6	38697840	38876190	178351	-	15258	uc009bkx.2	154	ENSMUSG00000061436	Hipk2	homeodomain interacting protein kinase 2
1265	chr6	47953772	47953836	65	*	0.000367486	4.08553e-05	0.000786241	-0.000745386	7.7317e-12	0.0250561	0.000145224	0.0248808	FALSE	Promoter (<=1kb)	chr6	47953390	47965299	11910	+	101197	uc009btr.2	446	ENSMUSG00000045466	Zfp956	zinc finger protein 956
1266	chr6	48047965	48048060	96	*	7.47662e-10	0.00534683	3.43112e-05	0.00531409	1.68112e-07	0.00445471	0.341828	-0.335349	FALSE	Promoter (<=1kb)	chr6	48024188	48048114	23927	-	72306	uc009btt.1	54	ENSMUSG00000071477	Zfp777	zinc finger protein 777
1267	chr6	48048062	48048062	1	*	7.47662e-10	0.00534683	3.43112e-05	0.00531409	0.00156103	0.0104313	0.000331629	0.0100996	TRUE	Promoter (<=1kb)	chr6	48024188	48048114	23927	-	72306	uc009btt.1	52	ENSMUSG00000071477	Zfp777	zinc finger protein 777
1268	chr6	48048064	48048260	197	*	7.47662e-10	0.00534683	3.43112e-05	0.00531409	8.78944e-12	0.000800686	0.346499	-0.345698	FALSE	Promoter (<=1kb)	chr6	48024188	48048114	23927	-	72306	uc009btt.1	0	ENSMUSG00000071477	Zfp777	zinc finger protein 777
1269	chr6	49319488	49319530	43	*	0.000234654	0.00452157	0.000139877	0.0043817	8.74593e-08	0.00224179	2.64783e-05	0.00221531	TRUE	Promoter (<=1kb)	chr6	49319353	49341581	22229	+	57895	uc009bwp.1	177	ENSMUSG00000050786	Ccdc126	coiled-coil domain containing 126
1270	chr6	50566508	50566556	49	*	4.90107e-10	0.384718	0.00217945	0.382539	1.04015e-05	0.000665614	2.32472e-05	0.000642367	TRUE	Promoter (<=1kb)	chr6	50562563	50566474	3912	-	13063	uc009bxc.1	-34	ENSMUSG00000063694	Cycs	cytochrome c, somatic
1271	chr6	51469552	51469628	77	*	3.54189e-06	0.00345202	6.11508e-05	0.00338644	1.30305e-06	0.0142984	0.000209073	0.0140893	TRUE	Promoter (<=1kb)	chr6	51460435	51469894	9460	-	53379	uc009bxo.2	266	ENSMUSG00000004980	Hnrnpa2b1	heterogeneous nuclear ribonucleoprotein A2/B1
1272	chr6	54817218	54817266	49	*	1.62914e-08	5.1884e-05	0.0243535	-0.0243016	4.05799e-11	0.000950174	0.337825	-0.336875	TRUE	Promoter (<=1kb)	chr6	54816916	54890224	73309	+	387524	uc009cae.2	350	ENSMUSG00000058446	Znrf2	zinc and ring finger 2
1273	chr6	56923620	56923620	1	*	0.000112049	2.99984e-05	0.000716353	-0.000686371	2.18841e-05	2.51314e-05	0.000672229	-0.000647098	TRUE	Promoter (<=1kb)	chr6	56882402	56923932	41531	-	107569	uc009cbr.3	312	ENSMUSG00000029780	Nt5c3	5'-nucleotidase, cytosolic III
1274	chr6	56923627	56923654	28	*	0.000112049	2.99984e-05	0.000716353	-0.000686371	1.14642e-13	0.345793	0.00039992	0.345393	FALSE	Promoter (<=1kb)	chr6	56882402	56923932	41531	-	107569	uc009cbr.3	278	ENSMUSG00000029780	Nt5c3	5'-nucleotidase, cytosolic III
1275	chr6	56923663	56923663	1	*	0.000112049	2.99984e-05	0.000716353	-0.000686371	0.000150271	2.39175e-05	0.000331177	-0.000307259	TRUE	Promoter (<=1kb)	chr6	56882402	56923932	41531	-	107569	uc009cbr.3	269	ENSMUSG00000029780	Nt5c3	5'-nucleotidase, cytosolic III
1276	chr6	67037116	67037185	70	*	4.16082e-08	0.00464865	4.93262e-05	0.00459933	2.92422e-07	0.0040909	2.82168e-05	0.00406269	TRUE	Promoter (<=1kb)	chr6	67035096	67037407	2312	-	13197	uc009cfc.1	222	ENSMUSG00000036390	Gadd45a	growth arrest and DNA-damage-inducible 45 alpha
1277	chr6	70844706	70844706	1	*	0.000143823	0.00130829	5.09848e-05	0.00125617	4.1613e-07	0.0023585	3.33559e-05	0.00232514	TRUE	Promoter (<=1kb)	chr6	70844527	70864825	20299	+	13666	uc009cga.1	179	ENSMUSG00000031668	Eif2ak3	eukaryotic translation initiation factor 2 alpha kinase 3
1278	chr6	70844708	70844710	3	*	0.000143823	0.00130829	5.09848e-05	0.00125617	1.08409e-08	0.0023782	0.332875	-0.330497	FALSE	Promoter (<=1kb)	chr6	70844527	70864825	20299	+	13666	uc009cga.1	183	ENSMUSG00000031668	Eif2ak3	eukaryotic translation initiation factor 2 alpha kinase 3
1279	chr6	70844717	70844735	19	*	0.000143823	0.00130829	5.09848e-05	0.00125617	1.126e-06	0.00240815	3.81484e-05	0.00237052	TRUE	Promoter (<=1kb)	chr6	70844527	70864825	20299	+	13666	uc009cga.1	208	ENSMUSG00000031668	Eif2ak3	eukaryotic translation initiation factor 2 alpha kinase 3
1280	chr6	70844742	70844751	10	*	0.000143823	0.00130829	5.09848e-05	0.00125617	1.35187e-08	0.00227954	0.324777	-0.322497	FALSE	Promoter (<=1kb)	chr6	70844527	70864825	20299	+	13666	uc009cga.1	224	ENSMUSG00000031668	Eif2ak3	eukaryotic translation initiation factor 2 alpha kinase 3
1281	chr6	70844753	70844755	3	*	0.000143823	0.00130829	5.09848e-05	0.00125617	2.5751e-06	0.00198981	3.87573e-05	0.00195105	TRUE	Promoter (<=1kb)	chr6	70844527	70864825	20299	+	13666	uc009cga.1	228	ENSMUSG00000031668	Eif2ak3	eukaryotic translation initiation factor 2 alpha kinase 3
1282	chr6	70844757	70844796	40	*	0.000143823	0.00130829	5.09848e-05	0.00125617	2.81856e-10	0.00127752	0.333769	-0.332491	FALSE	Promoter (<=1kb)	chr6	70844527	70864825	20299	+	13666	uc009cga.1	269	ENSMUSG00000031668	Eif2ak3	eukaryotic translation initiation factor 2 alpha kinase 3
1283	chr6	71271778	71271919	142	*	2.15399e-06	0.00564044	5.57181e-05	0.00557163	1.51417e-07	3.53269e-05	0.00453343	-0.00449698	FALSE	Promoter (<=1kb)	chr6	71271688	71285319	13632	+	57896	uc009cgm.1	231	ENSMUSG00000053012	Krcc1	lysine-rich coiled-coil 1
1284	chr6	71544185	71544267	83	*	1.24832e-09	0.382327	0.00181007	0.380517	1.34184e-10	0.000849485	0.311391	-0.310541	FALSE	Promoter (<=1kb)	chr6	71543854	71581574	37721	+	66700	uc009cgw.1	413	ENSMUSG00000053119	Chmp3	charged multivesicular body protein 3
1285	chr6	71544185	71544267	83	*	2.25747e-05	3.15083e-05	0.00153694	-0.00150543	1.34184e-10	0.000849485	0.311391	-0.310541	TRUE	Promoter (<=1kb)	chr6	71543854	71581574	37721	+	66700	uc009cgw.1	413	ENSMUSG00000053119	Chmp3	charged multivesicular body protein 3
1286	chr6	71544185	71544267	83	*	6.66294e-12	0.38516	0.000886525	0.384274	1.34184e-10	0.000849485	0.311391	-0.310541	FALSE	Promoter (<=1kb)	chr6	71543854	71581574	37721	+	66700	uc009cgw.1	413	ENSMUSG00000053119	Chmp3	charged multivesicular body protein 3
1287	chr6	72414192	72414253	62	*	0.000124511	3.16884e-05	0.000690655	-0.000658967	1.15476e-12	0.34262	0.000562874	0.341978	FALSE	Promoter (<=1kb)	chr6	72414308	72431106	16799	+	56316	uc009cio.2	-116	ENSMUSG00000053460	Ggcx	gamma-glutamyl carboxylase
1288	chr6	72438885	72438885	1	*	0.00101374	0.00997404	0.000310538	0.00966351	0.0035958	0.29135	0.0255082	0.265842	TRUE	Promoter (<=1kb)	chr6	72438683	72440615	1933	+	78108	uc029vwe.2	202	#N/A	Particl	promoter of Mat2a antisense radiation induced circulating long non-coding RNA
1289	chr6	72439121	72439312	192	*	9.60528e-08	0.384161	0.00485364	0.379538	2.50973e-09	0.34176	0.00211074	0.338894	TRUE	Promoter (<=1kb)	chr6	72432799	72439558	6760	-	232087	uc009cip.1	246	ENSMUSG00000053907	Mat2a	methionine adenosyltransferase II, alpha
1290	chr6	72899742	72899837	96	*	0.00225843	0.00243944	0.0821312	-0.0796918	5.17142e-09	0.00124248	2.46244e-05	0.00121769	FALSE	Promoter (<=1kb)	chr6	72841114	72899979	58866	-	74287	uc009cjd.1	142	ENSMUSG00000055239	Kcmf1	potassium channel modulatory factor 1
1291	chr6	72899742	72899837	96	*	0.00033981	0.00233795	8.14622e-05	0.00225649	5.17142e-09	0.00124248	2.46244e-05	0.00121769	TRUE	Promoter (<=1kb)	chr6	72841114	72899979	58866	-	74287	uc009cjd.1	142	ENSMUSG00000055239	Kcmf1	potassium channel modulatory factor 1
1292	chr6	83101954	83102013	60	*	6.07282e-05	0.00376423	0.237692	-0.233928	4.88853e-06	0.000247963	0.00834382	-0.00809586	TRUE	Promoter (<=1kb)	chr6	83101516	83109203	7688	+	243510	uc009cmj.1	497	ENSMUSG00000079511	Ccdc142	coiled-coil domain containing 142
1293	chr6	83102411	83102490	80	*	2.0137e-05	0.00242031	4.95223e-05	0.00237079	1.76875e-05	0.00969663	0.321627	-0.311367	FALSE	Promoter (<=1kb)	chr6	83101516	83109203	7688	+	243510	uc009cmj.1	974	ENSMUSG00000079511	Ccdc142	coiled-coil domain containing 142
1294	chr6	83914727	83914767	41	*	1.38885e-12	0.385142	0.000719391	0.384396	2.24729e-10	0.00145779	0.345809	-0.344351	FALSE	Promoter (<=1kb)	chr6	83914353	83931843	17491	+	18139	uc009coo.2	414	ENSMUSG00000030016	Zfp638	zinc finger protein 638
1295	chr6	85069491	85069536	46	*	2.77817e-05	0.000894892	3.18847e-05	0.000863007	2.92041e-05	0.000737785	2.54853e-05	0.0007123	TRUE	Promoter (<=1kb)	chr6	84618486	85069513	451028	-	75914	uc009cpa.2	0	ENSMUSG00000033769	Exoc6b	exocyst complex component 6B
1296	chr6	85431964	85432009	46	*	2.5149e-06	0.374365	0.0094505	0.363703	1.66639e-06	0.00637284	0.327008	-0.320676	FALSE	Promoter (<=1kb)	chr6	85431976	85446429	14454	+	232187	uc009cpq.1	0	ENSMUSG00000033706	Smyd5	SET and MYND domain containing 5
1297	chr6	86366005	86366028	24	*	8.63911e-08	0.380024	0.00613159	0.373661	3.64155e-07	3.09833e-05	0.00409075	-0.00405977	FALSE	Promoter (<=1kb)	chr6	86365683	86370058	4376	+	66488	uc009crl.1	345	ENSMUSG00000057497	Fam136a	family with sequence similarity 136, member A
1298	chr6	87914567	87914617	51	*	4.16724e-05	3.63706e-05	0.0017218	-0.00168543	1.21134e-08	0.00222924	0.337524	-0.335294	TRUE	Promoter (<=1kb)	chr6	87914306	87925810	11505	+	232210	uc009cui.1	311	ENSMUSG00000030060	Hmces	5-hydroxymethylcytosine (hmC) binding, ES cell specific
1299	chr6	88518771	88518895	125	*	2.24768e-10	0.00847137	3.49101e-05	0.00843646	1.96423e-05	0.019359	0.000415821	0.0189311	TRUE	Promoter (<=1kb)	chr6	88503607	88518800	15194	-	53421	uc009cvi.1	0	ENSMUSG00000030082	Sec61a1	Sec61 alpha 1 subunit (S. cerevisiae)
1300	chr6	89644115	89644171	57	*	2.64508e-07	3.03858e-05	0.0015629	-0.00153255	5.26581e-06	2.41647e-05	0.00089318	-0.000868995	TRUE	Promoter (<=1kb)	chr6	89643988	89675529	31542	+	232223	uc009cwj.1	183	ENSMUSG00000000811	Txnrd3	thioredoxin reductase 3
1301	chr6	91116839	91117009	171	*	4.27857e-06	0.00233744	3.5063e-05	0.00230238	1.98445e-07	0.328624	0.00412811	0.32388	TRUE	Promoter (<=1kb)	chr6	91013067	91116826	103760	-	54563	uc009cxu.2	-13	ENSMUSG00000030091	Nup210	nucleoporin 210
1302	chr6	92183969	92184018	50	*	1.11419e-05	0.352961	0.00919219	0.343768	2.62086e-06	2.57192e-05	0.00146722	-0.0014415	FALSE	Promoter (<=1kb)	chr6	92169523	92184023	14501	-	64658	uc009cyu.1	5	ENSMUSG00000014551	Mrps25	mitochondrial ribosomal protein S25
1303	chr6	99028358	99028371	14	*	1.42251e-07	3.37536e-05	0.00335922	-0.00332546	9.52334e-13	0.345097	0.000704725	0.344392	FALSE	Promoter (<=1kb)	chr6	98925342	99028298	102957	-	108655	uc009dbg.2	-60	ENSMUSG00000030067	Foxp1	forkhead box P1
1304	chr6	99028592	99028592	1	*	5.00378e-05	0.00315539	7.72988e-05	0.00307809	2.23115e-10	0.00117198	0.339044	-0.337872	FALSE	Promoter (<=1kb)	chr6	98954321	99028694	74374	-	108655	uc009dbo.1	102	ENSMUSG00000030067	Foxp1	forkhead box P1
1305	chr6	113076585	113076600	16	*	2.83622e-07	0.00823411	4.00505e-05	0.00820257	2.82898e-12	0.000382729	0.338115	-0.337733	FALSE	Promoter (<=1kb)	chr6	113067429	113077244	9816	-	14910	uc009dem.2	644	ENSMUSG00000086429	Gt(ROSA)26Sor	gene trap ROSA 26, Philippe Soriano
1306	chr6	115037945	115037956	12	*	5.77857e-08	3.94706e-05	0.00651581	-0.00647634	0.000240004	0.199653	0.000732159	0.19892	FALSE	Promoter (<=1kb)	chr6	115004381	115037874	33494	-	68971	uc009dij.1	-71	ENSMUSG00000030316	Tamm41	TAM41, mitochondrial translocator assembly and maintenance protein, homolog (S. cerevisiae)
1307	chr6	115808258	115808415	158	*	1.86413e-08	0.00690641	4.26775e-05	0.00686373	4.36263e-06	0.00204157	4.37761e-05	0.00199779	TRUE	Promoter (<=1kb)	chr6	115807975	115808103	129	-	100217451	uc012eqp.1	-155	ENSMUSG00000064563	Snora7a	small nucleolar RNA, H/ACA box 7A
1308	chr6	115808494	115808494	1	*	1.86413e-08	0.00690641	4.26775e-05	0.00686373	0.0033782	0.000779965	0.0205776	-0.0197976	FALSE	Promoter (<=1kb)	chr6	115805514	115808743	3230	-	19951	uc009djc.1	249	ENSMUSG00000057841	Rpl32	ribosomal protein L32
1309	chr6	119175571	119175664	94	*	1.18796e-05	0.00171501	3.83886e-05	0.00167752	4.70023e-09	0.00164987	0.335005	-0.333355	FALSE	Promoter (<=1kb)	chr6	119175253	119221614	46362	+	319618	uc009dlx.2	411	ENSMUSG00000041477	Dcp1b	DCP1 decapping enzyme homolog B (S. cerevisiae)
1310	chr6	119902857	119902924	68	*	1.19654e-11	0.381749	0.000925177	0.381081	1.26873e-09	0.338683	0.00167226	0.336989	TRUE	Promoter (<=1kb)	chr6	119902698	119921308	18611	+	19365	uc009dmo.2	226	ENSMUSG00000030166	Rad52	RAD52 homolog (S. cerevisiae)
1311	chr6	122339938	122340021	84	*	0.000361125	3.01505e-05	0.000385066	-0.000354916	3.48196e-13	0.344377	0.000539253	0.343834	FALSE	Promoter (<=1kb)	chr6	122317731	122340227	22497	-	13619	uc009dpb.2	206	ENSMUSG00000040669	Phc1	polyhomeotic-like 1 (Drosophila)
1312	chr6	122819853	122819916	64	*	1.30835e-12	0.381981	0.000572973	0.381277	1.15599e-09	2.66188e-05	0.00248189	-0.00245527	FALSE	Promoter (<=1kb)	chr6	122820184	122845366	25183	+	60611	uc012esh.1	-331	ENSMUSG00000003154	Foxj2	forkhead box J2
1313	chr6	124857236	124857451	216	*	0.000119548	0.000481294	0.0092547	-0.0087734	1.52326e-08	0.00354409	0.334979	-0.331314	TRUE	Promoter (<=1kb)	chr6	124841095	124857687	16593	-	14789	uc009dsf.1	236	ENSMUSG00000023191	P3h3	prolyl 3-hydroxylase 3
1314	chr6	127561273	127561316	44	*	5.88038e-07	3.28496e-05	0.00589854	-0.00586584	1.47518e-06	0.00438465	0.339862	-0.335426	TRUE	Distal Intergenic	chr6	127577975	127629938	51964	+	381812	uc009dwa.1	-16702	ENSMUSG00000061414	Cracr2a	calcium release activated channel regulator 2A
1315	chr6	128143281	128143341	61	*	3.0828e-07	0.00597727	6.87738e-05	0.00590849	2.53624e-09	0.00334233	2.57399e-05	0.00331659	TRUE	Promoter (<=1kb)	chr6	127961400	128143578	182179	-	109246	uc009ecp.1	237	ENSMUSG00000030352	Tspan9	tetraspanin 9
1316	chr6	128143703	128143760	58	*	7.2078e-05	4.10186e-05	0.00184904	-0.00180891	7.76536e-11	0.328626	0.000967323	0.327659	FALSE	Promoter (<=1kb)	chr6	127961400	128143578	182179	-	109246	uc009ecp.1	-125	ENSMUSG00000030352	Tspan9	tetraspanin 9
1317	chr6	128143703	128143760	58	*	1.06633e-09	0.377566	0.00164513	0.375921	7.76536e-11	0.328626	0.000967323	0.327659	TRUE	Promoter (<=1kb)	chr6	127961400	128143578	182179	-	109246	uc009ecp.1	-125	ENSMUSG00000030352	Tspan9	tetraspanin 9
1318	chr6	128362574	128362659	86	*	0.000450742	2.99663e-05	0.000443349	-0.000413383	7.79222e-11	0.00100262	0.333574	-0.332564	TRUE	Promoter (<=1kb)	chr6	128357000	128362822	5823	-	72440	uc009edj.2	163	ENSMUSG00000048668	Rhno1	RAD9-HUS1-RAD1 interacting nuclear orphan 1
1319	chr6	128362574	128362659	86	*	2.76254e-12	0.385025	0.000770525	0.384254	7.79222e-11	0.00100262	0.333574	-0.332564	FALSE	Promoter (<=1kb)	chr6	128357000	128362822	5823	-	72440	uc009edj.2	163	ENSMUSG00000048668	Rhno1	RAD9-HUS1-RAD1 interacting nuclear orphan 1
1320	chr6	134035783	134035940	158	*	1.9228e-06	0.00179553	3.08313e-05	0.0017647	3.37305e-08	0.338814	0.00170737	0.337106	TRUE	Promoter (<=1kb)	chr6	134035700	134270147	234448	+	14011	uc009eke.2	240	ENSMUSG00000030199	Etv6	ets variant 6
1321	chr6	134566814	134567021	208	*	0.002952	0.00907067	0.211936	-0.202866	3.18964e-06	0.00339504	0.287934	-0.283805	TRUE	Promoter (<=1kb)	chr6	134446478	134566913	120436	-	16974	uc009ekl.2	0	ENSMUSG00000030201	Lrp6	low density lipoprotein receptor-related protein 6
1322	chr6	134566814	134567021	208	*	9.18038e-06	0.00074412	2.9883e-05	0.000714254	3.18964e-06	0.00339504	0.287934	-0.283805	FALSE	Promoter (<=1kb)	chr6	134446478	134566913	120436	-	16974	uc009ekl.2	0	ENSMUSG00000030201	Lrp6	low density lipoprotein receptor-related protein 6
1323	chr6	136827910	136828037	128	*	2.9577e-09	0.383026	0.00235142	0.38045	2.15963e-08	4.16007e-05	0.0035783	-0.0035367	FALSE	Promoter (<=1kb)	chr6	136813654	136828216	14563	-	60321	uc009emf.2	179	ENSMUSG00000030216	Wbp11	WW domain binding protein 11
1324	chr6	146502225	146502259	35	*	5.67679e-06	3.24732e-05	0.00170993	-0.00167673	5.82034e-14	0.34491	0.000364275	0.344546	FALSE	Promoter (<=1kb)	chr6	146108299	146502223	393925	-	16439	uc009erw.2	-2	ENSMUSG00000030287	Itpr2	inositol 1,4,5-triphosphate receptor 2
1325	chr6	148946644	148946680	37	*	4.73088e-10	0.382232	0.002079	0.380153	8.93436e-09	0.00390706	3.64692e-05	0.0038706	TRUE	Promoter (<=1kb)	chr6	148921059	148946432	25374	-	56306	uc009etr.1	-212	ENSMUSG00000039985	Fam60a	family with sequence similarity 60, member A
1326	chr7	5015388	5015639	252	*	1.18006e-10	0.383177	0.00170539	0.381471	9.63404e-08	2.81127e-05	0.00219904	-0.00217093	FALSE	Promoter (<=1kb)	chr7	5015508	5018488	2981	+	66056	uc009ezj.1	0	ENSMUSG00000051184	Zfp524	zinc finger protein 524
1327	chr7	6155589	6155658	70	*	8.69107e-07	3.04221e-05	0.00114574	-0.00111532	1.23564e-14	0.000281779	0.344821	-0.34454	TRUE	Promoter (<=1kb)	chr7	6131489	6155971	24483	-	67109	uc009fap.1	313	ENSMUSG00000046792	Zfp787	zinc finger protein 787
1328	chr7	6155833	6155988	156	*	8.30347e-10	0.380896	0.00166117	0.379235	1.80282e-05	0.339402	0.0112211	0.326641	TRUE	Promoter (<=1kb)	chr7	6131489	6155971	24483	-	67109	uc009fap.1	0	ENSMUSG00000046792	Zfp787	zinc finger protein 787
1329	chr7	13024706	13024738	33	*	4.30019e-06	0.000385677	0.0603425	-0.059658	7.04708e-12	0.000763594	0.346407	-0.345643	TRUE	Promoter (<=1kb)	chr7	13024152	13031032	6881	+	21849	uc009ffb.2	586	ENSMUSG00000005566	Trim28	tripartite motif-containing 28
1330	chr7	13037585	13037675	91	*	2.71561e-05	0.0117455	0.00012555	0.01162	0.000595472	0.243139	0.0093116	0.232877	TRUE	Promoter (<=1kb)	chr7	13035120	13037627	2508	-	22192	uc029wdr.1	0	ENSMUSG00000005575	Ube2m	ubiquitin-conjugating enzyme E2M
1331	chr7	15948530	15948576	47	*	1.03143e-08	0.00986021	7.1248e-05	0.00978896	1.71737e-11	0.345561	0.000773049	0.344788	TRUE	Promoter (2-3kb)	chr7	15937836	15946108	8273	-	68077	uc009fgr.2	-2422	ENSMUSG00000041560	Gltscr2	glioma tumor suppressor candidate region gene 2
1332	chr7	16295071	16295118	48	*	1.6955e-07	3.00897e-05	0.00204522	-0.0020152	5.44333e-08	0.317147	0.0030165	0.31413	FALSE	Distal Intergenic	chr7	16274042	16286795	12754	-	243846	uc009fhm.2	-8276	ENSMUSG00000041375	Ccdc9	coiled-coil domain containing 9
1333	chr7	16738355	16738424	70	*	1.14794e-10	0.380192	0.00137037	0.378821	9.71572e-07	0.00465697	0.337937	-0.33328	FALSE	Promoter (<=1kb)	chr7	16738444	16749290	10847	+	232910	uc012faj.1	-89	ENSMUSG00000008036	Ap2s1	adaptor-related protein complex 2, sigma 1 subunit
1334	chr7	16738436	16738506	71	*	1.14794e-10	0.380192	0.00137037	0.378821	1.60493e-05	0.000733758	2.43724e-05	0.000709385	TRUE	Promoter (<=1kb)	chr7	16738444	16749290	10847	+	232910	uc012faj.1	0	ENSMUSG00000008036	Ap2s1	adaptor-related protein complex 2, sigma 1 subunit
1335	chr7	16843794	16843795	2	*	5.63715e-05	0.000147149	0.00704102	-0.00685078	0.000474665	0.00170213	7.25701e-05	0.00162956	FALSE	Promoter (<=1kb)	chr7	16843065	16870461	27397	+	101540	uc009fih.1	730	ENSMUSG00000041187	Prkd2	protein kinase D2
1336	chr7	16843805	16843806	2	*	5.63715e-05	0.000147149	0.00704102	-0.00685078	5.63105e-10	0.00109856	0.317123	-0.316025	TRUE	Promoter (<=1kb)	chr7	16843065	16870461	27397	+	101540	uc009fih.1	741	ENSMUSG00000041187	Prkd2	protein kinase D2
1337	chr7	16923473	16923473	1	*	1.65335e-06	6.78397e-05	0.00846999	-0.00839713	3.40287e-05	0.289857	0.00923443	0.280622	FALSE	Promoter (<=1kb)	chr7	16915379	16924032	8654	-	12315	uc009fin.1	559	ENSMUSG00000019370	Calm3	calmodulin 3
1338	chr7	16923633	16923633	1	*	5.18683e-06	0.00266941	4.08722e-05	0.00262995	6.41989e-06	0.00120064	2.75107e-05	0.00117313	TRUE	Promoter (<=1kb)	chr7	16915379	16924032	8654	-	12315	uc009fin.1	399	ENSMUSG00000019370	Calm3	calmodulin 3
1339	chr7	17027684	17027808	125	*	2.9191e-07	0.379965	0.00566202	0.374303	7.25158e-06	3.74479e-05	0.00341813	-0.00334899	FALSE	Promoter (<=1kb)	chr7	17004641	17027914	23274	-	19060	uc009fiq.2	106	ENSMUSG00000003099	Ppp5c	protein phosphatase 5, catalytic subunit
1340	chr7	19076674	19076769	96	*	0.000579758	0.00211285	0.000105774	0.00200402	4.94923e-07	0.32611	0.00502586	0.321085	TRUE	Promoter (<=1kb)	chr7	19076200	19082775	6576	+	13401	uc012fax.1	569	ENSMUSG00000030410	Dmwd	dystrophia myotonica-containing WD repeat motif
1341	chr7	19715015	19715100	86	*	0.00010072	0.000495712	3.02139e-05	0.000465499	6.64048e-10	0.340959	0.00147611	0.339483	TRUE	Promoter (<=1kb)	chr7	19701313	19715259	13947	-	53333	uc012fbi.1	159	ENSMUSG00000002984	Tomm40	translocase of outer mitochondrial membrane 40 homolog (yeast)
1342	chr7	24299589	24299668	80	*	5.87114e-08	0.354332	0.00380663	0.350525	2.05189e-10	0.00122692	0.339283	-0.338056	FALSE	Promoter (<=1kb)	chr7	24291046	24299549	8504	-	22719	uc009fpf.1	-40	ENSMUSG00000050605	Zfp61	zinc finger protein 61
1343	chr7	24902883	24902958	76	*	0.000202787	0.00549226	0.235184	-0.229692	6.418e-10	0.00165451	0.344559	-0.342905	TRUE	Promoter (<=1kb)	chr7	24902986	24909960	6975	+	16801	uc029wdx.1	-103	ENSMUSG00000040940	Arhgef1	Rho guanine nucleotide exchange factor (GEF) 1
1344	chr7	25179639	25179736	98	*	3.31716e-10	0.382105	0.00153409	0.380571	5.08152e-09	4.19976e-05	0.00658151	-0.00653951	FALSE	Distal Intergenic	chr7	25155069	25156630	1562	+	434147	uc029wdy.1	24667	ENSMUSG00000074274	D930028M14Rik	RIKEN cDNA D930028M14 gene
1345	chr7	25279659	25279701	43	*	1.54666e-07	0.37098	0.00390044	0.36708	3.84204e-05	3.11738e-05	0.00112561	-0.00109443	FALSE	Promoter (2-3kb)	chr7	25282179	25291342	9164	+	71722	uc057agj.1	-2520	ENSMUSG00000005442	Cic	capicua homolog (Drosophila)
1346	chr7	27674045	27674176	132	*	2.95099e-05	0.00275745	5.45749e-05	0.00270287	2.31279e-06	0.330559	0.00707438	0.323485	TRUE	Promoter (<=1kb)	chr7	27656375	27674581	18207	-	269881	uc009fwv.2	405	ENSMUSG00000040390	Map3k10	mitogen-activated protein kinase kinase kinase 10
1347	chr7	27674406	27674554	149	*	2.02818e-05	0.00209893	4.34241e-05	0.0020625	6.45251e-05	0.000380865	2.31389e-05	0.000357766	TRUE	Promoter (<=1kb)	chr7	27656375	27674581	18207	-	269881	uc009fwv.2	27	ENSMUSG00000040390	Map3k10	mitogen-activated protein kinase kinase kinase 10
1348	chr7	28435872	28435992	121	*	1.92892e-09	0.376352	0.00207538	0.374277	2.64516e-06	0.000324559	0.336078	-0.331008	FALSE	Promoter (<=1kb)	chr7	28399522	28436191	36670	-	233033	uc009fyw.2	199	ENSMUSG00000030602	Samd4b	sterile alpha motif domain containing 4B
1349	chr7	28435872	28435992	121	*	0.000139072	3.08929e-05	0.000764686	-0.000733793	2.64516e-06	0.000324559	0.336078	-0.331008	TRUE	Promoter (<=1kb)	chr7	28399522	28436191	36670	-	233033	uc009fyw.2	199	ENSMUSG00000030602	Samd4b	sterile alpha motif domain containing 4B
1350	chr7	30121845	30121917	73	*	4.33782e-05	0.00376911	8.48281e-05	0.00368429	7.10439e-10	0.344561	0.00171338	0.342585	TRUE	Promoter (<=1kb)	chr7	30121948	30135032	13085	+	233060	uc009gdf.1	-103	ENSMUSG00000074220	Zfp382	zinc finger protein 382
1351	chr7	34655346	34655454	109	*	5.13008e-06	0.00304988	3.60024e-05	0.00301496	1.35672e-08	0.319289	0.00190751	0.31762	TRUE	Promoter (<=1kb)	chr7	34639016	34655509	16494	-	233107	uc009gjg.2	55	ENSMUSG00000030499	Kctd15	potassium channel tetramerisation domain containing 15
1352	chr7	38107530	38107639	110	*	7.65797e-07	0.00237905	3.78785e-05	0.00234053	4.23213e-07	0.00436804	0.33008	-0.324762	FALSE	Promoter (<=1kb)	chr7	38097984	38107490	9507	-	12447	uc009gkr.1	-40	ENSMUSG00000002068	Ccne1	cyclin E1
1353	chr7	38107655	38107735	81	*	7.65797e-07	0.00237905	3.78785e-05	0.00234053	8.48805e-09	0.00346006	2.83178e-05	0.0034325	TRUE	Promoter (<=1kb)	chr7	38097984	38107490	9507	-	12447	uc009gkr.1	-165	ENSMUSG00000002068	Ccne1	cyclin E1
1354	chr7	38107982	38108027	46	*	3.06241e-12	0.00874708	3.63576e-05	0.00871303	5.16737e-08	0.00355062	0.335265	-0.331714	FALSE	Promoter (<=1kb)	chr7	38097984	38107490	9507	-	12447	uc009gkr.1	-492	ENSMUSG00000002068	Ccne1	cyclin E1
1355	chr7	41500150	41500150	1	*	1.92944e-05	5.92468e-05	0.00566166	-0.00559986	0.000164325	0.000577125	0.0265176	-0.0259404	TRUE	Promoter (<=1kb)	chr7	41478874	41499890	21017	-	101835	uc009glq.1	-260	ENSMUSG00000074166	AW146154	expressed sequence AW146154
1356	chr7	43443579	43443600	22	*	6.99214e-08	5.32467e-05	0.0114523	-0.0113991	9.6144e-05	0.00537431	0.212076	-0.206702	TRUE	Promoter (<=1kb)	chr7	43444072	43457800	13729	+	110826	uc009gmt.2	-493	ENSMUSG00000004610	Etfb	electron transferring flavoprotein, beta polypeptide
1357	chr7	44360171	44360171	1	*	1.35492e-05	0.00303859	6.88333e-05	0.00296975	2.83488e-06	0.00506375	0.29694	-0.291876	FALSE	3' UTR	chr7	44351557	44356327	4771	+	243961	uc009gpe.2	8614	ENSMUSG00000038738	Shank1	SH3/ankyrin domain gene 1
1358	chr7	44360177	44360184	8	*	1.35492e-05	0.00303859	6.88333e-05	0.00296975	3.31133e-06	0.00443682	6.65324e-05	0.00437029	TRUE	3' UTR	chr7	44351557	44356327	4771	+	243961	uc009gpe.2	8627	ENSMUSG00000038738	Shank1	SH3/ankyrin domain gene 1
1359	chr7	44929444	44929556	113	*	1.37663e-09	0.378699	0.00247541	0.376225	8.86061e-08	0.334379	0.00514197	0.329237	TRUE	Promoter (<=1kb)	chr7	44900373	44929490	29118	-	11771	uc009grv.1	0	ENSMUSG00000060279	Ap2a1	adaptor-related protein complex 2, alpha 1 subunit
1360	chr7	46845428	46845441	14	*	3.99953e-11	0.370765	0.000907442	0.369858	3.49665e-07	0.00191665	0.238632	-0.236715	FALSE	Promoter (<=1kb)	chr7	46845804	46855627	9824	+	16828	uc009gzm.2	-376	ENSMUSG00000063229	Ldha	lactate dehydrogenase A
1361	chr7	46845662	46845776	115	*	8.8153e-07	0.00817614	9.70986e-05	0.00807905	1.93363e-09	0.00398861	3.45907e-05	0.00395428	TRUE	Promoter (<=1kb)	chr7	46845804	46855627	9824	+	16828	uc009gzm.2	-142	ENSMUSG00000063229	Ldha	lactate dehydrogenase A
1362	chr7	46846186	46846232	47	*	5.16058e-11	0.384283	0.00122625	0.383117	0.000149849	0.00652043	0.000156944	0.00643022	TRUE	Promoter (<=1kb)	chr7	46845804	46855627	9824	+	16828	uc009gzm.2	428	ENSMUSG00000063229	Ldha	lactate dehydrogenase A
1363	chr7	49778566	49778683	118	*	1.0246e-06	0.00546803	4.11974e-05	0.00541318	1.49019e-11	0.0113735	4.29677e-05	0.0113149	TRUE	Promoter (<=1kb)	chr7	49778358	49784615	6258	+	71974	uc009hbs.1	325	ENSMUSG00000030505	Prmt3	protein arginine N-methyltransferase 3
1364	chr7	49778822	49778822	1	*	3.31776e-06	9.7298e-05	0.00765884	-0.00756508	3.22984e-05	7.59073e-05	0.00482697	-0.00475107	TRUE	Promoter (<=1kb)	chr7	49778358	49784615	6258	+	71974	uc009hbs.1	464	ENSMUSG00000030505	Prmt3	protein arginine N-methyltransferase 3
1365	chr7	55794351	55794388	38	*	3.06447e-11	0.382064	0.00131036	0.380754	4.35514e-12	0.334432	0.000660546	0.333822	TRUE	Promoter (<=1kb)	chr7	55794148	55827099	32952	+	233276	uc009hdd.1	240	ENSMUSG00000033790	Tubgcp5	tubulin, gamma complex associated protein 5
1366	chr7	66689927	66690009	83	*	2.37843e-08	3.2293e-05	0.00448361	-0.00445131	5.08034e-07	8.2708e-05	0.00709752	-0.00701481	TRUE	Promoter (<=1kb)	chr7	66689889	66709902	20014	+	72635	uc009hhp.2	120	ENSMUSG00000053091	Lins1	lines homolog (Drosophila) 1
1367	chr7	78782865	78782924	60	*	0.000159798	3.19019e-05	0.000755025	-0.000723048	4.3131e-05	0.0202727	0.000351222	0.0199215	FALSE	Promoter (<=1kb)	chr7	78775341	78783089	7749	-	67308	uc009hxl.1	165	ENSMUSG00000030612	Mrpl46	mitochondrial ribosomal protein L46
1368	chr7	78847144	78847161	18	*	9.9616e-05	0.194045	0.00113806	0.192907	3.32402e-20	5.72887e-05	0.346861	-0.346804	FALSE	Promoter (<=1kb)	chr7	78827474	78847211	19738	-	76375	uc009hxo.1	50	ENSMUSG00000030610	Det1	de-etiolated homolog 1 (Arabidopsis)
1369	chr7	79392138	79392213	76	*	9.86011e-06	0.374646	0.00757826	0.367068	7.06444e-05	0.00172218	3.98575e-05	0.00168232	TRUE	Promoter (<=1kb)	chr7	79392338	79409582	17245	+	208836	uc009hyg.1	-200	ENSMUSG00000039187	Fanci	Fanconi anemia, complementation group I
1370	chr7	80688749	80688772	24	*	6.00198e-08	3.62724e-05	0.00610236	-0.00607108	1.14558e-08	0.00467152	4.2561e-05	0.00462896	FALSE	Promoter (<=1kb)	chr7	80586632	80688877	102246	-	70461	uc009iaz.1	105	ENSMUSG00000030527	Crtc3	CREB regulated transcription coactivator 3
1371	chr7	80688805	80688851	47	*	6.00198e-08	3.62724e-05	0.00610236	-0.00607108	4.32523e-07	0.00334692	0.323691	-0.320344	TRUE	Promoter (<=1kb)	chr7	80586632	80688877	102246	-	70461	uc009iaz.1	26	ENSMUSG00000030527	Crtc3	CREB regulated transcription coactivator 3
1372	chr7	80993276	80993293	18	*	0.000124569	5.44736e-05	0.00473326	-0.00468328	0.000337911	0.319567	0.0155247	0.304022	FALSE	Promoter (<=1kb)	chr7	80993684	81045162	51479	+	233410	uc009ibp.2	-408	ENSMUSG00000005621	Zfp592	zinc finger protein 592
1373	chr7	80993294	80993319	26	*	0.000124569	5.44736e-05	0.00473326	-0.00468328	5.22709e-07	5.74578e-05	0.0118374	-0.0117799	TRUE	Promoter (<=1kb)	chr7	80993684	81045162	51479	+	233410	uc009ibp.2	-390	ENSMUSG00000005621	Zfp592	zinc finger protein 592
1374	chr7	80993328	80993328	1	*	0.000124569	5.44736e-05	0.00473326	-0.00468328	4.60489e-05	0.309566	0.0087362	0.30083	FALSE	Promoter (<=1kb)	chr7	80993684	81045162	51479	+	233410	uc009ibp.2	-356	ENSMUSG00000005621	Zfp592	zinc finger protein 592
1375	chr7	80993341	80993342	2	*	0.000124569	5.44736e-05	0.00473326	-0.00468328	2.65413e-06	5.31638e-05	0.00618889	-0.00613573	TRUE	Promoter (<=1kb)	chr7	80993684	81045162	51479	+	233410	uc009ibp.2	-343	ENSMUSG00000005621	Zfp592	zinc finger protein 592
1376	chr7	80993351	80993351	1	*	0.000124569	5.44736e-05	0.00473326	-0.00468328	9.59405e-07	0.324867	0.00450618	0.320361	FALSE	Promoter (<=1kb)	chr7	80993684	81045162	51479	+	233410	uc009ibp.2	-333	ENSMUSG00000005621	Zfp592	zinc finger protein 592
1377	chr7	80993352	80993352	1	*	0.000124569	5.44736e-05	0.00473326	-0.00468328	1.17156e-06	4.01837e-05	0.00435311	-0.00431293	TRUE	Promoter (<=1kb)	chr7	80993684	81045162	51479	+	233410	uc009ibp.2	-332	ENSMUSG00000005621	Zfp592	zinc finger protein 592
1378	chr7	80993353	80993363	11	*	0.000124569	5.44736e-05	0.00473326	-0.00468328	2.89428e-07	0.330111	0.00353245	0.326578	FALSE	Promoter (<=1kb)	chr7	80993684	81045162	51479	+	233410	uc009ibp.2	-331	ENSMUSG00000005621	Zfp592	zinc finger protein 592
1379	chr7	80993365	80993365	1	*	0.000124569	5.44736e-05	0.00473326	-0.00468328	1.42824e-06	3.2261e-05	0.00264413	-0.00261186	TRUE	Promoter (<=1kb)	chr7	80993684	81045162	51479	+	233410	uc009ibp.2	-319	ENSMUSG00000005621	Zfp592	zinc finger protein 592
1380	chr7	80993366	80993383	18	*	0.000124569	5.44736e-05	0.00473326	-0.00468328	6.94853e-11	0.343359	0.001032	0.342327	FALSE	Promoter (<=1kb)	chr7	80993684	81045162	51479	+	233410	uc009ibp.2	-318	ENSMUSG00000005621	Zfp592	zinc finger protein 592
1381	chr7	80993390	80993391	2	*	0.000124569	5.44736e-05	0.00473326	-0.00468328	7.48064e-05	2.3634e-05	0.000395348	-0.000371714	TRUE	Promoter (<=1kb)	chr7	80993684	81045162	51479	+	233410	uc009ibp.2	-294	ENSMUSG00000005621	Zfp592	zinc finger protein 592
1382	chr7	81344718	81344817	100	*	1.68938e-05	0.00286739	4.80995e-05	0.00281929	3.7498e-05	0.00565284	8.89314e-05	0.00552328	TRUE	Promoter (<=1kb)	chr7	81342733	81345106	2374	-	20068	uc009ibu.1	289	ENSMUSG00000061787	Rps17	ribosomal protein S17
1383	chr7	82865882	82865882	1	*	6.61848e-05	6.2582e-05	0.00155149	-0.00148891	6.46158e-08	0.00213242	3.44912e-05	0.00209793	FALSE	Promoter (1-2kb)	chr7	82867333	82871576	4244	+	108797	uc009idj.2	-1451	ENSMUSG00000057706	Mex3b	mex3 homolog B (C. elegans)
1384	chr7	84689637	84689690	54	*	3.50444e-06	0.00196	4.0226e-05	0.0019057	3.27043e-10	0.00975012	3.42781e-05	0.00971584	TRUE	Promoter (<=1kb)	chr7	84689640	84776549	86910	+	72495	uc009ieo.1	0	#N/A	2610206C17Rik	RIKEN cDNA 2610206C17 gene
1385	chr7	84689794	84689869	76	*	3.50444e-06	0.00196	4.0226e-05	0.0019057	2.56235e-07	3.57828e-05	0.00465491	-0.00461928	FALSE	Promoter (<=1kb)	chr7	84615054	84689853	74800	-	65098	uc009iem.1	0	ENSMUSG00000030629	Zfand6	zinc finger, AN1-type domain 6
1386	chr7	90476290	90476389	100	*	3.83604e-06	0.00396023	6.11754e-05	0.00389905	1.0907e-05	0.00321468	6.48735e-05	0.00314981	TRUE	Promoter (<=1kb)	chr7	90468829	90475995	7167	-	68472	uc009ihp.1	-295	ENSMUSG00000030614	Tmem126b	transmembrane protein 126B
1387	chr7	101821911	101821956	46	*	0.000179342	0.000123981	0.00658955	-0.00646557	2.81092e-06	0.0059599	0.312524	-0.306564	TRUE	Exon (uc009ipe.2/11859, exon 3 of 3)	chr7	101818313	101822726	4414	+	11859	uc009ipe.2	3643	ENSMUSG00000007946	Phox2a	paired-like homeobox 2a
1388	chr7	110018597	110018687	91	*	2.18857e-05	3.24949e-05	0.00152681	-0.00149431	1.0153e-07	3.0484e-05	0.00337062	-0.00334013	TRUE	Promoter (<=1kb)	chr7	110018425	110046251	27827	+	233726	uc009jet.1	262	ENSMUSG00000066232	Ipo7	importin 7
1389	chr7	111028894	111028943	50	*	4.07383e-07	3.02186e-05	0.00147912	-0.00144866	3.16233e-09	0.00768079	3.93076e-05	0.00763906	FALSE	Promoter (<=1kb)	chr7	111028951	111047647	18697	+	22083	uc009jfw.1	-57	ENSMUSG00000005609	Ctr9	Ctr9, Paf1/RNA polymerase II complex component, homolog (S. cerevisiae)
1390	chr7	113207665	113207780	116	*	4.93395e-11	0.00220486	3.42675e-05	0.00217059	7.41945e-15	0.343373	0.000288161	0.343084	TRUE	Promoter (<=1kb)	chr7	113207465	113295593	88129	+	11865	uc012fsi.1	315	ENSMUSG00000055116	Arntl	aryl hydrocarbon receptor nuclear translocator-like
1391	chr7	114117418	114117458	41	*	3.60723e-09	0.00315022	3.55152e-05	0.0031147	2.43031e-06	3.75012e-05	0.00331942	-0.00328192	FALSE	Promoter (<=1kb)	chr7	114046782	114117781	71000	-	66922	uc009jhw.2	323	ENSMUSG00000055723	Rras2	related RAS viral (r-ras) oncogene homolog 2
1392	chr7	120982626	120982626	1	*	3.04716e-05	0.00171855	3.82556e-05	0.00165999	0.00137675	0.0446267	0.00157258	0.0430542	TRUE	Promoter (<=1kb)	chr7	120982509	121014787	32279	+	74466	uc009jnj.1	117	ENSMUSG00000030877	4933427G17Rik	RIKEN cDNA 4933427G17 gene
1393	chr7	121034685	121034715	31	*	6.39017e-05	3.11055e-05	0.00100594	-0.000974836	2.11159e-07	2.86697e-05	0.00369612	-0.00366765	TRUE	Promoter (<=1kb)	chr7	121034445	121076835	42391	+	59052	uc009jnk.1	270	ENSMUSG00000030876	Mettl9	methyltransferase like 9
1394	chr7	121034824	121034824	1	*	6.39017e-05	3.11055e-05	0.00100594	-0.000974836	0.0016516	2.29513e-05	0.0001332	-0.000110249	TRUE	Promoter (<=1kb)	chr7	121034445	121076835	42391	+	59052	uc009jnk.1	379	ENSMUSG00000030876	Mettl9	methyltransferase like 9
1395	chr7	122067386	122067387	2	*	1.77288e-05	0.00344714	3.68573e-05	0.00330555	1.30984e-07	0.337825	0.00338349	0.334442	TRUE	Promoter (<=1kb)	chr7	122067198	122071406	4209	+	28018	uc009jof.1	189	ENSMUSG00000030870	Ubfd1	ubiquitin family domain containing 1
1396	chr7	122067400	122067400	1	*	1.77288e-05	0.00344714	3.68573e-05	0.00330555	1.1196e-07	3.19811e-05	0.00405866	-0.00402668	FALSE	Promoter (<=1kb)	chr7	122067198	122071406	4209	+	28018	uc009jof.1	202	ENSMUSG00000030870	Ubfd1	ubiquitin family domain containing 1
1397	chr7	122067401	122067409	9	*	1.77288e-05	0.00344714	3.68573e-05	0.00330555	1.85409e-06	0.326982	0.00515768	0.321824	TRUE	Promoter (<=1kb)	chr7	122067198	122071406	4209	+	28018	uc009jof.1	211	ENSMUSG00000030870	Ubfd1	ubiquitin family domain containing 1
1398	chr7	122067479	122067541	63	*	1.77288e-05	0.00344714	3.68573e-05	0.00330555	1.80801e-06	2.80056e-05	0.00217898	-0.00215098	FALSE	Promoter (<=1kb)	chr7	122067198	122071406	4209	+	28018	uc009jof.1	343	ENSMUSG00000030870	Ubfd1	ubiquitin family domain containing 1
1399	chr7	126566158	126566188	31	*	4.61852e-05	0.00128036	3.6284e-05	0.00124408	3.68837e-09	0.33318	0.00163273	0.331547	TRUE	Promoter (<=1kb)	chr7	126546911	126566366	19456	-	56347	uc009jrw.1	178	ENSMUSG00000030738	Eif3c	eukaryotic translation initiation factor 3, subunit C
1400	chr7	126649253	126649327	75	*	0.000416047	4.02705e-05	0.000873048	-0.000832778	2.40647e-07	0.0106417	9.31092e-05	0.0105486	FALSE	Promoter (<=1kb)	chr7	126649309	126672779	23471	+	75565	uc009jse.2	0	ENSMUSG00000030714	Ccdc101	coiled-coil domain containing 101
1401	chr7	126759756	126759834	79	*	8.54588e-12	0.384263	0.000917484	0.383346	7.27149e-06	0.000642791	2.42461e-05	0.000618545	TRUE	Promoter (<=1kb)	chr7	126759626	126765816	6191	+	26417	uc009jsm.1	208	ENSMUSG00000063065	Mapk3	mitogen-activated protein kinase 3
1402	chr7	127195948	127195948	1	*	1.302e-06	9.68364e-05	0.0102443	-0.0101475	5.99977e-06	2.45964e-05	0.000916164	-0.000891568	TRUE	Promoter (<=1kb)	chr7	127191660	127196077	4418	-	70233	uc009juj.2	129	ENSMUSG00000042502	Cd2bp2	CD2 antigen (cytoplasmic tail) binding protein 2
1403	chr7	127208178	127208214	37	*	2.5315e-10	0.381973	0.00180042	0.380173	2.03167e-09	0.0010973	0.28986	-0.288763	FALSE	Promoter (<=1kb)	chr7	127197459	127208468	11010	-	68449	uc009juo.3	254	ENSMUSG00000042492	Tbc1d10b	TBC1 domain family, member 10b
1404	chr7	133637648	133637693	46	*	6.97096e-09	0.00235476	3.18403e-05	0.00232288	9.58726e-08	2.42378e-05	0.0014197	-0.00139609	FALSE	Promoter (<=1kb)	chr7	133637675	133654407	16733	+	214764	uc009kdb.2	0	ENSMUSG00000039990	Edrf1	erythroid differentiation regulatory factor 1
1405	chr7	133709419	133709427	9	*	0.00011962	3.43675e-05	0.000989046	-0.000954678	0.000250304	0.0279945	0.000844607	0.0273096	FALSE	Promoter (<=1kb)	chr7	133709333	133721145	11813	+	66165	uc009kdi.1	94	ENSMUSG00000030983	Bccip	BRCA2 and CDKN1A interacting protein
1406	chr7	139248688	139248816	129	*	0.000210402	0.000937792	4.45794e-05	0.000893213	1.72194e-10	0.343551	0.00120671	0.342344	TRUE	Promoter (<=1kb)	chr7	139248482	139267253	18772	+	101631	uc009kfo.1	334	ENSMUSG00000060260	Pwwp2b	PWWP domain containing 2B
1407	chr7	143069081	143069153	73	*	3.60662e-05	0.0227491	0.00040507	0.0223441	2.83604e-05	0.000636517	2.44448e-05	0.000611941	TRUE	Promoter (<=1kb)	chr7	143069368	143071087	1720	+	56844	uc009kov.1	-287	ENSMUSG00000045752	Tssc4	tumor-suppressing subchromosomal transferable fragment 4
1408	chr7	143069081	143069153	73	*	0.000920415	0.0097395	0.268669	-0.25893	2.83604e-05	0.000636517	2.44448e-05	0.000611941	FALSE	Promoter (<=1kb)	chr7	143069368	143071087	1720	+	56844	uc009kov.1	-287	ENSMUSG00000045752	Tssc4	tumor-suppressing subchromosomal transferable fragment 4
1409	chr7	143069172	143069367	196	*	0.010614	0.00919761	0.137413	-0.128216	1.22797e-09	0.00123745	0.331577	-0.329797	TRUE	Promoter (<=1kb)	chr7	143069368	143071087	1720	+	56844	uc009kov.1	-196	ENSMUSG00000045752	Tssc4	tumor-suppressing subchromosomal transferable fragment 4
1410	chr7	143069172	143069367	196	*	9.65312e-07	0.00136746	3.26046e-05	0.00133486	1.22797e-09	0.00123745	0.331577	-0.329797	FALSE	Promoter (<=1kb)	chr7	143069368	143071087	1720	+	56844	uc009kov.1	-196	ENSMUSG00000045752	Tssc4	tumor-suppressing subchromosomal transferable fragment 4
1411	chr7	145031039	145031047	9	*	5.1059e-10	0.366069	0.00150874	0.364553	2.73467e-06	0.000109697	0.00609348	-0.00598324	FALSE	Distal Intergenic	chr7	144929931	144939925	9995	-	12443	uc009kqt.1	-91114	ENSMUSG00000070348	Ccnd1	cyclin D1
1412	chr7	145031082	145031084	3	*	5.1059e-10	0.366069	0.00150874	0.364553	2.39418e-07	0.312902	0.00414103	0.308761	TRUE	Distal Intergenic	chr7	144929931	144939925	9995	-	12443	uc009kqt.1	-91157	ENSMUSG00000070348	Ccnd1	cyclin D1
1413	chr8	4253032	4253079	48	*	1.80214e-10	0.383692	0.0013673	0.382325	2.41171e-05	0.00134695	3.26791e-05	0.00131427	TRUE	Promoter (<=1kb)	chr8	4253102	4256220	3119	+	102209	uc009kto.1	-70	ENSMUSG00000011837	Snapc2	small nuclear RNA activating complex, polypeptide 2
1414	chr8	4253032	4253079	48	*	4.76079e-05	3.10983e-05	0.00113937	-0.00110828	2.41171e-05	0.00134695	3.26791e-05	0.00131427	FALSE	Promoter (<=1kb)	chr8	4253102	4256220	3119	+	102209	uc009kto.1	-70	ENSMUSG00000011837	Snapc2	small nuclear RNA activating complex, polypeptide 2
1415	chr8	4253032	4253079	48	*	2.08728e-12	0.385075	0.000730038	0.384345	2.41171e-05	0.00134695	3.26791e-05	0.00131427	TRUE	Promoter (<=1kb)	chr8	4253102	4256220	3119	+	102209	uc009kto.1	-70	ENSMUSG00000011837	Snapc2	small nuclear RNA activating complex, polypeptide 2
1416	chr8	4275901	4275947	47	*	0.000195465	3.02093e-05	0.000811253	-0.000781078	3.76349e-07	0.00170993	0.232562	-0.230852	TRUE	Promoter (<=1kb)	chr8	4259731	4275905	16175	-	21856	uc009ktq.2	0	ENSMUSG00000002949	Timm44	translocase of inner mitochondrial membrane 44
1417	chr8	11558420	11558466	47	*	9.73712e-12	0.381082	0.000972883	0.380109	2.24334e-05	2.31497e-05	0.000551064	-0.000527915	FALSE	Promoter (<=1kb)	chr8	11558410	11563251	4842	+	26356	uc009kvn.2	56	ENSMUSG00000045969	Ing1	inhibitor of growth family, member 1
1418	chr8	13287492	13287617	126	*	0.000112754	3.30034e-05	0.000927663	-0.000894659	2.69272e-06	0.337971	0.0089238	0.330702	FALSE	Promoter (<=1kb)	chr8	13288013	13297617	9605	+	234076	uc009kxm.1	-521	ENSMUSG00000038497	Tmco3	transmembrane and coiled-coil domains 3
1419	chr8	13494476	13494495	20	*	4.19161e-05	4.36365e-05	0.00231788	-0.00227458	4.83794e-05	0.00474472	0.237794	-0.233049	TRUE	Promoter (<=1kb)	chr8	13465374	13494535	29162	-	14456	uc009kya.1	40	ENSMUSG00000031451	Gas6	growth arrest specific 6
1420	chr8	13677278	13677596	319	*	6.92039e-08	0.0468577	9.81433e-05	0.0467595	5.79107e-05	2.38194e-05	0.000477041	-0.000453221	FALSE	Promoter (<=1kb)	chr8	13567218	13677587	110370	-	19414	uc009kye.1	0	ENSMUSG00000031453	Rasa3	RAS p21 protein activator 3
1421	chr8	13677278	13677596	319	*	2.53176e-05	0.00242294	4.95554e-05	0.00237339	5.79107e-05	2.38194e-05	0.000477041	-0.000453221	FALSE	Promoter (<=1kb)	chr8	13567218	13677587	110370	-	19414	uc009kye.1	0	ENSMUSG00000031453	Rasa3	RAS p21 protein activator 3
1422	chr8	22192991	22193038	48	*	6.59533e-09	0.380284	0.00232882	0.377955	1.87752e-12	0.343931	0.000559434	0.343371	TRUE	Promoter (<=1kb)	chr8	22192860	22218597	25738	+	70160	uc009lct.1	178	ENSMUSG00000031479	Vps36	vacuolar protein sorting 36 (yeast)
1423	chr8	25993941	25993941	1	*	0.000244185	0.00570055	0.242443	-0.236743	0.000829057	0.233215	0.0120594	0.221156	FALSE	Promoter (<=1kb)	chr8	25980604	25994121	13518	-	74653	uc009lhh.1	180	ENSMUSG00000037251	Pomk	protein-O-mannose kinase
1424	chr8	32009745	32009775	31	*	9.69993e-06	0.00185173	3.50708e-05	0.00181666	1.31074e-08	0.00755301	3.41833e-05	0.00751883	TRUE	Promoter (<=1kb)	chr8	31818028	32009491	191464	-	211323	uc009ljp.1	-254	ENSMUSG00000062991	Nrg1	neuregulin 1
1425	chr8	34965555	34965680	126	*	0.000260375	3.04465e-05	0.0005156	-0.000485153	1.24113e-09	0.343291	0.00173237	0.340785	FALSE	Promoter (<=1kb)	chr8	34829179	34965690	136512	-	21951	uc009lkv.1	10	ENSMUSG00000031529	Tnks	tankyrase, TRF1-interacting ankyrin-related ADP-ribose polymerase
1426	chr8	34965555	34965680	126	*	5.25716e-07	0.002762	3.11446e-05	0.00273085	1.24113e-09	0.343291	0.00173237	0.340785	TRUE	Promoter (<=1kb)	chr8	34829179	34965690	136512	-	21951	uc009lkv.1	10	ENSMUSG00000031529	Tnks	tankyrase, TRF1-interacting ankyrin-related ADP-ribose polymerase
1427	chr8	36248146	36248159	14	*	3.71152e-08	0.381183	0.00321025	0.378017	0.000353971	0.000598621	4.21381e-05	0.000556483	TRUE	Promoter (1-2kb)	chr8	36216064	36249516	33453	-	244421	uc009llj.1	1357	ENSMUSG00000039633	Lonrf1	LON peptidase N-terminal domain and ring finger 1
1428	chr8	36248965	36249000	36	*	1.71423e-08	0.382903	0.0036192	0.379284	1.61575e-05	0.000630961	2.55516e-05	0.000605409	TRUE	Promoter (<=1kb)	chr8	36216064	36249516	33453	-	244421	uc009llj.1	516	ENSMUSG00000039633	Lonrf1	LON peptidase N-terminal domain and ring finger 1
1429	chr8	36248965	36249000	36	*	1.52548e-07	3.1781e-05	0.00262662	-0.00259484	1.61575e-05	0.000630961	2.55516e-05	0.000605409	FALSE	Promoter (<=1kb)	chr8	36216064	36249516	33453	-	244421	uc009llj.1	516	ENSMUSG00000039633	Lonrf1	LON peptidase N-terminal domain and ring finger 1
1430	chr8	36249005	36249009	5	*	1.52548e-07	3.1781e-05	0.00262662	-0.00259484	1.01613e-12	0.000597727	0.344108	-0.34351	TRUE	Promoter (<=1kb)	chr8	36216064	36249516	33453	-	244421	uc009llj.1	507	ENSMUSG00000039633	Lonrf1	LON peptidase N-terminal domain and ring finger 1
1431	chr8	36249018	36249019	2	*	1.52548e-07	3.1781e-05	0.00262662	-0.00259484	1.86192e-05	0.000575964	2.49699e-05	0.000550994	FALSE	Promoter (<=1kb)	chr8	36216064	36249516	33453	-	244421	uc009llj.1	497	ENSMUSG00000039633	Lonrf1	LON peptidase N-terminal domain and ring finger 1
1432	chr8	36249026	36249026	1	*	8.90389e-11	0.384989	0.00166384	0.383325	2.54306e-13	0.000494127	0.345358	-0.344864	FALSE	Promoter (<=1kb)	chr8	36216064	36249516	33453	-	244421	uc009llj.1	490	ENSMUSG00000039633	Lonrf1	LON peptidase N-terminal domain and ring finger 1
1433	chr8	36249028	36249044	17	*	8.90389e-11	0.384989	0.00166384	0.383325	3.74287e-05	0.000424745	2.38768e-05	0.000400868	TRUE	Promoter (<=1kb)	chr8	36216064	36249516	33453	-	244421	uc009llj.1	472	ENSMUSG00000039633	Lonrf1	LON peptidase N-terminal domain and ring finger 1
1434	chr8	36249048	36249048	1	*	8.90389e-11	0.384989	0.00166384	0.383325	3.28017e-14	0.000372954	0.346489	-0.346116	FALSE	Promoter (<=1kb)	chr8	36216064	36249516	33453	-	244421	uc009llj.1	468	ENSMUSG00000039633	Lonrf1	LON peptidase N-terminal domain and ring finger 1
1435	chr8	36249057	36249057	1	*	8.90389e-11	0.384989	0.00166384	0.383325	1.22948e-05	0.000385031	2.34338e-05	0.000361597	TRUE	Promoter (<=1kb)	chr8	36216064	36249516	33453	-	244421	uc009llj.1	459	ENSMUSG00000039633	Lonrf1	LON peptidase N-terminal domain and ring finger 1
1436	chr8	41239576	41239576	1	*	4.76286e-08	0.380781	0.00343314	0.377348	1.7488e-09	0.00348331	2.73979e-05	0.00345592	TRUE	Promoter (<=1kb)	chr8	41239759	41275094	35336	+	18536	uc009lnq.2	-183	ENSMUSG00000031592	Pcm1	pericentriolar material 1
1437	chr8	41239585	41239585	1	*	4.76286e-08	0.380781	0.00343314	0.377348	9.38162e-08	0.00383002	0.333562	-0.329732	FALSE	Promoter (<=1kb)	chr8	41239759	41275094	35336	+	18536	uc009lnq.2	-174	ENSMUSG00000031592	Pcm1	pericentriolar material 1
1438	chr8	41239589	41239589	1	*	4.76286e-08	0.380781	0.00343314	0.377348	1.88683e-08	0.00399938	3.71904e-05	0.00396219	TRUE	Promoter (<=1kb)	chr8	41239759	41275094	35336	+	18536	uc009lnq.2	-170	ENSMUSG00000031592	Pcm1	pericentriolar material 1
1439	chr8	41239594	41239609	16	*	4.76286e-08	0.380781	0.00343314	0.377348	2.23428e-06	0.00481937	0.304156	-0.299337	FALSE	Promoter (<=1kb)	chr8	41239759	41275094	35336	+	18536	uc009lnq.2	-165	ENSMUSG00000031592	Pcm1	pericentriolar material 1
1440	chr8	41239613	41239617	5	*	4.76286e-08	0.380781	0.00343314	0.377348	2.95013e-05	0.00586683	0.000132556	0.00573428	TRUE	Promoter (<=1kb)	chr8	41239759	41275094	35336	+	18536	uc009lnq.2	-146	ENSMUSG00000031592	Pcm1	pericentriolar material 1
1441	chr8	41239613	41239617	5	*	1.35709e-05	6.60959e-05	0.00664529	-0.0065792	2.95013e-05	0.00586683	0.000132556	0.00573428	FALSE	Promoter (<=1kb)	chr8	41239759	41275094	35336	+	18536	uc009lnq.2	-146	ENSMUSG00000031592	Pcm1	pericentriolar material 1
1442	chr8	47674787	47674931	145	*	8.73896e-07	0.00256355	3.92078e-05	0.00252434	2.58869e-10	0.00142482	0.342019	-0.340594	FALSE	Promoter (<=1kb)	chr8	47667178	47675159	7982	-	69260	uc009lrf.2	228	ENSMUSG00000063049	Ing2	inhibitor of growth family, member 2
1443	chr8	47674937	47674973	37	*	8.73896e-07	0.00256355	3.92078e-05	0.00252434	4.30399e-05	0.000973306	2.43737e-05	0.000948932	TRUE	Promoter (<=1kb)	chr8	47667178	47675159	7982	-	69260	uc009lrf.2	186	ENSMUSG00000063049	Ing2	inhibitor of growth family, member 2
1444	chr8	47674996	47675111	116	*	2.66684e-10	0.384835	0.00150431	0.38333	5.98009e-07	0.00662984	5.01672e-05	0.00658346	TRUE	Promoter (<=1kb)	chr8	47667178	47675159	7982	-	69260	uc009lrf.2	48	ENSMUSG00000063049	Ing2	inhibitor of growth family, member 2
1445	chr8	57511644	57511689	46	*	0.000184812	3.00952e-05	0.000577807	-0.000547712	5.15704e-13	0.339036	0.000472386	0.33865	FALSE	Promoter (<=1kb)	chr8	57511843	57515999	4157	+	97165	uc009lsx.2	-199	ENSMUSG00000054717	Hmgb2	high mobility group box 2
1446	chr8	61224577	61224625	49	*	8.32996e-06	3.53047e-05	0.0017139	-0.00168417	7.81563e-05	0.00993634	0.276389	-0.266334	TRUE	Promoter (<=1kb)	chr8	61224171	61386641	162471	+	59009	uc009ltw.1	454	ENSMUSG00000031642	Sh3rf1	SH3 domain containing ring finger 1
1447	chr8	66860363	66860421	59	*	2.83948e-06	3.98083e-05	0.00163883	-0.00159902	1.23002e-07	0.00599064	6.51473e-05	0.00592552	FALSE	Promoter (<=1kb)	chr8	66860217	66890564	30348	+	234344	uc009lvu.2	204	ENSMUSG00000014907	Naf1	nuclear assembly factor 1 homolog (S. cerevisiae)
1448	chr8	68062189	68062260	72	*	3.66353e-08	0.00451283	3.58247e-05	0.00447932	4.63611e-07	0.00350396	5.0507e-05	0.00345038	TRUE	Promoter (<=1kb)	chr8	67790470	68062286	271817	-	234353	uc009lwc.1	26	ENSMUSG00000030465	Psd3	pleckstrin and Sec7 domain containing 3
1449	chr8	68062268	68062307	40	*	3.66353e-08	0.00451283	3.58247e-05	0.00447932	1.31463e-07	0.00290715	0.363859	-0.360966	FALSE	Promoter (<=1kb)	chr8	67790470	68062286	271817	-	234353	uc009lwc.1	0	ENSMUSG00000030465	Psd3	pleckstrin and Sec7 domain containing 3
1450	chr8	69791285	69791381	97	*	1.34062e-05	4.03227e-05	0.00252105	-0.00248072	0.000262384	0.00181308	2.45496e-05	0.00178853	FALSE	Promoter (<=1kb)	chr8	69791163	69807748	16586	+	170759	uc009lxr.2	218	ENSMUSG00000031862	Atp13a1	ATPase type 13A1
1451	chr8	69791285	69791381	97	*	4.39707e-08	0.377478	0.00396983	0.373508	0.000262384	0.00181308	2.45496e-05	0.00178853	TRUE	Promoter (<=1kb)	chr8	69791163	69807748	16586	+	170759	uc009lxr.2	218	ENSMUSG00000031862	Atp13a1	ATPase type 13A1
1452	chr8	69791485	69791497	13	*	4.39707e-08	0.377478	0.00396983	0.373508	3.26771e-06	0.00672067	0.328418	-0.321707	FALSE	Promoter (<=1kb)	chr8	69791163	69807748	16586	+	170759	uc009lxr.2	334	ENSMUSG00000031862	Atp13a1	ATPase type 13A1
1453	chr8	70042868	70042904	37	*	0.000113081	9.76843e-05	0.00642035	-0.00632769	3.09805e-05	0.00493459	7.76923e-05	0.00486179	FALSE	Promoter (<=1kb)	chr8	70042813	70058317	15505	+	70616	uc009lym.1	91	ENSMUSG00000011306	Sugp1	SURP and G patch domain containing 1
1454	chr8	70043068	70043110	43	*	9.70919e-05	0.0015203	5.04907e-05	0.00147911	1.41291e-06	0.00574679	6.96199e-05	0.00567717	TRUE	Promoter (<=1kb)	chr8	70042813	70058317	15505	+	70616	uc009lym.1	297	ENSMUSG00000011306	Sugp1	SURP and G patch domain containing 1
1455	chr8	70506647	70506647	1	*	1.75717e-05	0.351585	0.00997333	0.341507	0.00147391	0.0106103	0.000493256	0.010117	TRUE	Promoter (<=1kb)	chr8	70504296	70506739	2444	-	66462	uc009mal.1	92	ENSMUSG00000058833	2810428I15Rik	RIKEN cDNA 2810428I15 gene
1456	chr8	70698422	70698457	36	*	9.28952e-13	0.384135	0.000688989	0.383446	3.18606e-05	0.000163396	0.00856634	-0.00840294	FALSE	Promoter (<=1kb)	chr8	70697739	70700616	2878	+	16478	uc009mbe.2	718	ENSMUSG00000071076	Jund	jun D proto-oncogene
1457	chr8	71592454	71592458	5	*	8.73635e-09	0.00290522	3.40762e-05	0.00287259	4.60194e-05	2.36252e-05	0.000451511	-0.000427886	FALSE	Promoter (<=1kb)	chr8	71592184	71596267	4084	+	66171	uc009meb.1	274	ENSMUSG00000031807	Pgls	6-phosphogluconolactonase
1458	chr8	71592463	71592463	1	*	8.73635e-09	0.00290522	3.40762e-05	0.00287259	0.00019992	0.0628496	0.00101586	0.0618338	TRUE	Promoter (<=1kb)	chr8	71592184	71596267	4084	+	66171	uc009meb.1	279	ENSMUSG00000031807	Pgls	6-phosphogluconolactonase
1459	chr8	71592472	71592549	78	*	8.73635e-09	0.00290522	3.40762e-05	0.00287259	9.54143e-07	3.26791e-05	0.00154705	-0.00151437	FALSE	Promoter (<=1kb)	chr8	71592184	71596267	4084	+	66171	uc009meb.1	365	ENSMUSG00000031807	Pgls	6-phosphogluconolactonase
1460	chr8	71592683	71592718	36	*	7.07734e-06	4.89167e-05	0.00438885	-0.0043406	4.21916e-09	0.341445	0.00194674	0.339488	FALSE	Promoter (<=1kb)	chr8	71592184	71596267	4084	+	66171	uc009meb.1	534	ENSMUSG00000031807	Pgls	6-phosphogluconolactonase
1461	chr8	72443762	72443831	70	*	1.28401e-11	0.382884	0.000935252	0.381972	5.63134e-08	0.00199899	2.56047e-05	0.00197339	TRUE	Promoter (<=1kb)	chr8	72424183	72443778	19596	-	73316	uc009mfx.1	0	ENSMUSG00000019732	Calr3	calreticulin 3
1462	chr8	72570606	72570643	38	*	2.54507e-08	0.366286	0.00291462	0.363279	8.54649e-08	0.339365	0.00317706	0.336188	TRUE	Promoter (<=1kb)	chr8	72565198	72571048	5851	-	66818	uc009mgh.1	405	ENSMUSG00000044600	Smim7	small integral membrane protein 7
1463	chr8	72570653	72570653	1	*	2.54507e-08	0.366286	0.00291462	0.363279	8.21914e-07	2.40671e-05	0.00170882	-0.00168475	FALSE	Promoter (<=1kb)	chr8	72565198	72571048	5851	-	66818	uc009mgh.1	395	ENSMUSG00000044600	Smim7	small integral membrane protein 7
1464	chr8	84799702	84799777	76	*	5.59091e-07	3.08753e-05	0.00134596	-0.00131507	8.208e-09	0.340103	0.00273719	0.337348	FALSE	Promoter (<=1kb)	chr8	84704712	84800338	95627	-	18032	uc009mne.2	561	ENSMUSG00000001911	Nfix	nuclear factor I/X
1465	chr8	84800344	84800473	130	*	6.81595e-08	3.21011e-05	0.00293033	-0.00289889	8.85703e-09	0.337375	0.00336665	0.333867	FALSE	Promoter (<=1kb)	chr8	84704712	84800338	95627	-	18032	uc009mne.2	-6	ENSMUSG00000001911	Nfix	nuclear factor I/X
1466	chr8	84800344	84800473	130	*	0.000913473	0.00674232	0.0002365	0.00650582	8.85703e-09	0.337375	0.00336665	0.333867	TRUE	Promoter (<=1kb)	chr8	84704712	84800338	95627	-	18032	uc009mne.2	-6	ENSMUSG00000001911	Nfix	nuclear factor I/X
1467	chr8	84840403	84840431	29	*	4.06413e-23	3.05348e-05	0.00686919	-0.00678338	3.25047e-09	0.00208192	0.332203	-0.330121	TRUE	Promoter (<=1kb)	chr8	84834652	84840665	6014	-	19358	uc009mnk.2	234	ENSMUSG00000003813	Rad23a	RAD23a homolog (S. cerevisiae)
1468	chr8	84856948	84856998	51	*	5.64903e-09	0.38184	0.00295186	0.378888	9.64785e-06	0.014515	0.000163995	0.014351	TRUE	Promoter (<=1kb)	chr8	84856986	84867026	10041	+	66590	uc009mnr.2	0	ENSMUSG00000003808	Farsa	phenylalanyl-tRNA synthetase, alpha subunit
1469	chr8	84857001	84857001	1	*	5.64903e-09	0.38184	0.00295186	0.378888	9.70683e-06	0.00577139	0.286786	-0.281015	FALSE	Promoter (<=1kb)	chr8	84856986	84867026	10041	+	66590	uc009mnr.2	15	ENSMUSG00000003808	Farsa	phenylalanyl-tRNA synthetase, alpha subunit
1470	chr8	84857012	84857039	28	*	5.64903e-09	0.38184	0.00295186	0.378888	6.30519e-06	0.00360291	5.94248e-05	0.00354348	TRUE	Promoter (<=1kb)	chr8	84856986	84867026	10041	+	66590	uc009mnr.2	53	ENSMUSG00000003808	Farsa	phenylalanyl-tRNA synthetase, alpha subunit
1471	chr8	84908636	84908745	110	*	4.48896e-07	3.737e-05	0.00259532	-0.00255795	1.52487e-08	0.00319242	0.341132	-0.337939	TRUE	Promoter (<=1kb)	chr8	84908624	84911461	2838	+	13423	uc009moa.1	121	ENSMUSG00000003812	Dnase2a	deoxyribonuclease II alpha
1472	chr8	94172676	94172764	89	*	1.6335e-14	0.383569	0.000430292	0.383138	3.39535e-07	0.314725	0.00382848	0.311113	TRUE	Promoter (<=1kb)	chr8	94172618	94173567	950	+	17750	uc009mvv.1	146	ENSMUSG00000031762	Mt2	metallothionein 2
1473	chr8	105636753	105636787	35	*	3.00164e-05	0.000774006	3.08034e-05	0.000743203	8.2274e-13	0.000514007	0.344341	-0.343827	FALSE	Promoter (<=1kb)	chr8	105636538	105682922	46385	+	13018	uc009ndm.2	249	ENSMUSG00000005698	Ctcf	CCCTC-binding factor
1474	chr8	105636753	105636787	35	*	8.88378e-05	3.28075e-05	0.00143999	-0.00140719	8.2274e-13	0.000514007	0.344341	-0.343827	TRUE	Promoter (<=1kb)	chr8	105636538	105682922	46385	+	13018	uc009ndm.2	249	ENSMUSG00000005698	Ctcf	CCCTC-binding factor
1475	chr8	105636753	105636787	35	*	4.52807e-09	0.380933	0.00200455	0.378928	8.2274e-13	0.000514007	0.344341	-0.343827	FALSE	Promoter (<=1kb)	chr8	105636538	105682922	46385	+	13018	uc009ndm.2	249	ENSMUSG00000005698	Ctcf	CCCTC-binding factor
1476	chr8	105637265	105637270	6	*	3.05877e-05	5.21513e-05	0.0026347	-0.00258255	6.00217e-05	0.0554489	0.000683217	0.0547657	FALSE	Promoter (<=1kb)	chr8	105566695	105637474	70780	-	11604	uc009ndi.2	204	ENSMUSG00000005705	Agrp	agouti related neuropeptide
1477	chr8	106059556	106059758	203	*	9.07442e-11	0.383547	0.00134038	0.382207	2.86997e-12	0.000483354	0.344805	-0.344238	FALSE	Promoter (<=1kb)	chr8	106059603	106092579	32977	+	18021	uc009nfc.2	0	ENSMUSG00000031902	Nfatc3	nuclear factor of activated T cells, cytoplasmic, calcineurin dependent 3
1478	chr8	106059556	106059758	203	*	0.000127973	0.000452532	3.05427e-05	0.000421886	2.86997e-12	0.000483354	0.344805	-0.344238	FALSE	Promoter (<=1kb)	chr8	106059603	106092579	32977	+	18021	uc009nfc.2	0	ENSMUSG00000031902	Nfatc3	nuclear factor of activated T cells, cytoplasmic, calcineurin dependent 3
1479	chr8	106059759	106059765	7	*	0.000127973	0.000452532	3.05427e-05	0.000421886	8.20894e-09	0.345545	0.00226574	0.34328	TRUE	Promoter (<=1kb)	chr8	106059603	106092579	32977	+	18021	uc009nfc.2	162	ENSMUSG00000031902	Nfatc3	nuclear factor of activated T cells, cytoplasmic, calcineurin dependent 3
1480	chr8	106059767	106059767	1	*	0.000127973	0.000452532	3.05427e-05	0.000421886	2.46075e-07	2.46256e-05	0.00266828	-0.00264365	FALSE	Promoter (<=1kb)	chr8	106059603	106092579	32977	+	18021	uc009nfc.2	164	ENSMUSG00000031902	Nfatc3	nuclear factor of activated T cells, cytoplasmic, calcineurin dependent 3
1481	chr8	107293619	107293665	47	*	4.20092e-09	0.00699402	3.23601e-05	0.00696319	2.33189e-07	0.317736	0.00343728	0.31422	TRUE	Promoter (<=1kb)	chr8	107293470	107329307	35838	+	54446	uc012gkc.1	195	ENSMUSG00000003847	Nfat5	nuclear factor of activated T cells 5
1482	chr8	107436477	107436526	50	*	8.04876e-07	0.00317477	4.40471e-05	0.00313072	6.83152e-09	0.00215874	0.342147	-0.339988	FALSE	Promoter (<=1kb)	chr8	107436398	107518111	81714	+	66894	uc009nht.1	128	ENSMUSG00000031930	Wwp2	WW domain containing E3 ubiquitin protein ligase 2
1483	chr8	109778918	109779032	115	*	4.85937e-07	0.0040488	4.28301e-05	0.00399803	6.43707e-09	0.00394185	4.02122e-05	0.00390164	TRUE	Promoter (<=1kb)	chr8	109778583	109864209	85627	+	11765	uc012gkl.3	449	ENSMUSG00000031731	Ap1g1	adaptor protein complex AP-1, gamma 1 subunit
1484	chr8	109779213	109779213	1	*	4.85937e-07	0.0040488	4.28301e-05	0.00399803	2.23305e-09	0.334481	0.00178843	0.332693	TRUE	Promoter (<=1kb)	chr8	109778583	109864209	85627	+	11765	uc012gkl.3	630	ENSMUSG00000031731	Ap1g1	adaptor protein complex AP-1, gamma 1 subunit
1485	chr8	111056951	111057167	217	*	1.1901e-05	0.00421348	7.02644e-05	0.00414247	1.04802e-05	0.304984	0.00725701	0.296762	TRUE	Promoter (<=1kb)	chr8	111056339	111057664	1326	+	72544	uc009nlp.2	828	#N/A	Exosc6	exosome component 6
1486	chr8	111056951	111057167	217	*	5.50704e-08	3.892e-05	0.00568728	-0.00564831	1.04802e-05	0.304984	0.00725701	0.296762	FALSE	Promoter (<=1kb)	chr8	111056339	111057664	1326	+	72544	uc009nlp.2	828	#N/A	Exosc6	exosome component 6
1487	chr8	111299985	111300045	61	*	2.97409e-05	5.00589e-05	0.00248592	-0.00243586	1.98552e-07	0.00478712	0.341264	-0.336306	TRUE	Promoter (<=1kb)	chr8	111270944	111300222	29279	-	234736	uc009nmb.1	177	ENSMUSG00000033596	Rfwd3	ring finger and WD repeat domain 3
1488	chr8	111732060	111732132	73	*	0.000684188	4.11526e-05	0.000936158	-0.000895006	3.78391e-09	0.00222619	0.343267	-0.34104	TRUE	Promoter (<=1kb)	chr8	111710475	111732136	21662	-	12927	uc009nmt.2	4	ENSMUSG00000031955	Bcar1	breast cancer anti-estrogen resistance 1
1489	chr8	116733132	116733234	103	*	5.20407e-06	0.00101859	2.97976e-05	0.000988764	1.12805e-05	2.29517e-05	0.000568314	-0.000545396	FALSE	Promoter (<=1kb)	chr8	116568724	116732991	164268	-	75796	uc009noi.2	-141	ENSMUSG00000031758	Cdyl2	chromodomain protein, Y chromosome-like 2
1490	chr8	116733132	116733234	103	*	2.38914e-05	0.00145647	0.168977	-0.167521	1.12805e-05	2.29517e-05	0.000568314	-0.000545396	TRUE	Promoter (<=1kb)	chr8	116568724	116732991	164268	-	75796	uc009noi.2	-141	ENSMUSG00000031758	Cdyl2	chromodomain protein, Y chromosome-like 2
1491	chr8	119558802	119558832	31	*	3.2716e-06	0.00140995	3.83909e-05	0.00137155	2.38064e-12	0.000716017	0.341294	-0.340578	FALSE	Promoter (<=1kb)	chr8	119508152	119558761	50610	-	56453	uc009nps.2	-41	ENSMUSG00000031835	Mbtps1	membrane-bound transcription factor peptidase, site 1
1492	chr8	120101243	120101286	44	*	0.0001933	0.00968566	0.000303536	0.00935061	1.82574e-20	0.00630272	3.13866e-05	0.00627144	TRUE	Promoter (<=1kb)	chr8	120081095	120101472	20378	-	102193	uc009nqr.1	186	ENSMUSG00000031823	Zdhhc7	zinc finger, DHHC domain containing 7
1493	chr8	120487581	120487589	9	*	3.31154e-05	0.00117055	3.6522e-05	0.00113403	4.87299e-11	0.00102095	0.345067	-0.344046	FALSE	Promoter (1-2kb)	chr8	120488866	120581383	92518	+	382034	uc009nqz.2	-1285	ENSMUSG00000031822	Gse1	genetic suppressor element 1
1494	chr8	121907601	121907688	88	*	1.9335e-07	0.00354417	3.57347e-05	0.00350704	1.77287e-05	0.219539	0.00267285	0.215978	TRUE	Promoter (<=1kb)	chr8	121881146	121907686	26541	-	20539	uc009nsc.2	0	ENSMUSG00000040010	Slc7a5	solute carrier family 7 (cationic amino acid transporter, y+ system), member 5
1495	chr8	122551303	122551342	40	*	3.31586e-07	0.002049	3.28878e-05	0.00201611	1.38934e-06	2.47931e-05	0.00121077	-0.00118598	FALSE	Promoter (<=1kb)	chr8	122481698	122551329	69632	-	234839	uc012gme.1	0	ENSMUSG00000014444	Piezo1	piezo-type mechanosensitive ion channel component 1
1496	chr8	126593420	126593470	51	*	6.03435e-07	0.00196439	3.60443e-05	0.00192764	5.66969e-07	2.34271e-05	0.000842379	-0.000818952	FALSE	Promoter (<=1kb)	chr8	126588296	126593436	5141	-	270110	uc009nyw.2	0	ENSMUSG00000051495	Irf2bp2	interferon regulatory factor 2 binding protein 2
1497	chr9	7764449	7764491	43	*	0.000103504	0.000164524	0.0124821	-0.0123176	1.23704e-05	0.287343	0.00561823	0.281725	FALSE	Promoter (<=1kb)	chr9	7764077	7791108	27032	+	71929	uc009ocw.2	414	ENSMUSG00000050912	Tmem123	transmembrane protein 123
1498	chr9	8004510	8004543	34	*	2.24339e-13	0.383762	0.000524164	0.383227	3.98754e-12	0.000718664	0.347234	-0.346516	FALSE	Promoter (<=1kb)	chr9	7932001	8004596	72596	-	22601	uc009ode.2	53	ENSMUSG00000053110	Yap1	yes-associated protein 1
1499	chr9	8004544	8004547	4	*	2.24339e-13	0.383762	0.000524164	0.383227	1.76432e-06	0.0011405	2.3263e-05	0.00111724	TRUE	Promoter (<=1kb)	chr9	7932001	8004596	72596	-	22601	uc009ode.2	49	ENSMUSG00000053110	Yap1	yes-associated protein 1
1500	chr9	8004549	8004549	1	*	2.24339e-13	0.383762	0.000524164	0.383227	8.28e-11	0.00113597	0.346927	-0.345791	FALSE	Promoter (<=1kb)	chr9	7932001	8004596	72596	-	22601	uc009ode.2	47	ENSMUSG00000053110	Yap1	yes-associated protein 1
1501	chr9	8004552	8004552	1	*	2.24339e-13	0.383762	0.000524164	0.383227	1.71352e-06	0.00113737	2.32322e-05	0.00111414	TRUE	Promoter (<=1kb)	chr9	7932001	8004596	72596	-	22601	uc009ode.2	44	ENSMUSG00000053110	Yap1	yes-associated protein 1
1502	chr9	8004555	8004555	1	*	2.24339e-13	0.383762	0.000524164	0.383227	8.48621e-11	0.00114307	0.346949	-0.345806	FALSE	Promoter (<=1kb)	chr9	7932001	8004596	72596	-	22601	uc009ode.2	41	ENSMUSG00000053110	Yap1	yes-associated protein 1
1503	chr9	8004588	8004727	140	*	2.24339e-13	0.383762	0.000524164	0.383227	8.45946e-06	0.000742208	2.37552e-05	0.000718459	TRUE	Promoter (<=1kb)	chr9	7932001	8004596	72596	-	22601	uc009ode.2	0	ENSMUSG00000053110	Yap1	yes-associated protein 1
1504	chr9	13827859	13827880	22	*	5.94455e-09	0.0106586	9.81709e-05	0.0105604	3.29268e-08	0.00262881	0.341307	-0.338678	FALSE	Promoter (<=1kb)	chr9	13827727	13846522	18796	+	72826	uc009oef.1	153	ENSMUSG00000037808	Fam76b	family with sequence similarity 76, member B
1505	chr9	20643022	20643040	19	*	4.17485e-07	2.97791e-05	0.00134546	-0.00131568	0.000319478	2.39173e-05	0.000364655	-0.000340737	TRUE	Promoter (<=1kb)	chr9	20643318	20646789	3472	+	66177	uc009ojc.1	-296	ENSMUSG00000084786	Ubl5	ubiquitin-like 5
1506	chr9	20888475	20888519	45	*	7.40925e-11	0.384469	0.00131564	0.383153	6.1091e-09	0.00229206	0.344756	-0.342512	FALSE	Promoter (<=1kb)	chr9	20888271	20892179	3909	+	235036	uc009ojl.2	248	ENSMUSG00000004100	Ppan	peter pan homolog (Drosophila)
1507	chr9	20952206	20952245	40	*	2.09825e-09	0.379448	0.00200154	0.377446	4.26373e-10	0.0013333	0.342041	-0.340708	FALSE	Promoter (<=1kb)	chr9	20907206	20952623	45418	-	13433	uc009ojo.2	378	ENSMUSG00000004099	Dnmt1	DNA methyltransferase (cytosine-5) 1
1508	chr9	20975825	20975919	95	*	0.000201844	9.96144e-05	0.00474066	-0.00455584	2.78396e-07	0.298738	0.00296431	0.295774	FALSE	Promoter (<=1kb)	chr9	20965952	20976793	10842	-	14739	uc009ojt.2	874	ENSMUSG00000043895	S1pr2	sphingosine-1-phosphate receptor 2
1509	chr9	21032134	21032168	35	*	0.000218395	0.205583	0.00211699	0.203538	2.93373e-10	0.336132	0.00193704	0.334569	TRUE	Promoter (<=1kb)	chr9	21032038	21039036	6999	+	15898	uc009oka.2	130	ENSMUSG00000032174	Icam5	intercellular adhesion molecule 5, telencephalin
1510	chr9	21238764	21238934	171	*	1.46034e-08	0.379037	0.00231248	0.376552	4.76486e-10	0.00175212	0.329365	-0.327707	FALSE	Promoter (<=1kb)	chr9	21229730	21239332	9603	-	50868	uc009oko.2	398	ENSMUSG00000003308	Keap1	kelch-like ECH-associated protein 1
1511	chr9	21546863	21546875	13	*	4.82866e-07	5.63987e-05	0.00187431	-0.00181791	1.4912e-07	2.31608e-05	0.00208436	-0.0020612	TRUE	Promoter (<=1kb)	chr9	21546894	21589465	42572	+	59035	uc009olu.2	-31	ENSMUSG00000032185	Carm1	coactivator-associated arginine methyltransferase 1
1512	chr9	22388674	22388706	33	*	2.29565e-06	0.382347	0.00850125	0.373846	1.54461e-10	0.00116875	0.34223	-0.340945	FALSE	Promoter (<=1kb)	chr9	22331214	22389206	57993	-	68743	uc009ook.2	500	ENSMUSG00000036777	Anln	anillin, actin binding protein
1513	chr9	27029595	27029750	156	*	6.27714e-07	0.379726	0.00550146	0.373452	7.11379e-06	0.00638899	0.309865	-0.303476	FALSE	Promoter (<=1kb)	chr9	27004502	27030094	25593	-	69091	uc009oqd.2	344	ENSMUSG00000031988	Vps26b	vacuolar protein sorting 26 homolog B (yeast)
1514	chr9	27299558	27299598	41	*	1.0981e-05	0.409245	0.00741149	0.401833	9.30728e-06	0.222377	0.00342473	0.218952	TRUE	Promoter (<=1kb)	chr9	27299228	27330135	30908	+	235086	uc009oql.1	370	ENSMUSG00000034275	Igsf9b	immunoglobulin superfamily, member 9B
1515	chr9	37489860	37489881	22	*	0.000994562	0.00929823	0.00028209	0.00901614	2.57866e-06	0.305029	0.00219715	0.302832	TRUE	Promoter (<=1kb)	chr9	37489321	37518787	29467	+	235184	uc009oux.1	560	ENSMUSG00000042138	Msantd2	Myb/SANT-like DNA-binding domain containing 2
1516	chr9	44113201	44113265	65	*	6.28005e-06	0.00107787	3.00048e-05	0.00104787	2.60143e-06	0.314921	0.00561179	0.309629	TRUE	Promoter (<=1kb)	chr9	44110781	44113051	2271	-	213211	uc009pbu.2	-150	ENSMUSG00000053128	Rnf26	ring finger protein 26
1517	chr9	44113316	44113343	28	*	1.59773e-05	3.21974e-05	0.00217495	-0.0021429	4.0307e-15	0.000256517	0.346489	-0.346233	TRUE	Promoter (<=1kb)	chr9	44110781	44113051	2271	-	213211	uc009pbu.2	-265	ENSMUSG00000053128	Rnf26	ring finger protein 26
1518	chr9	44361521	44361648	128	*	5.83661e-12	0.380616	0.000853352	0.37977	2.33829e-07	0.327964	0.00387814	0.323569	TRUE	Promoter (<=1kb)	chr9	44355336	44361637	6302	-	71732	uc009pdd.1	0	ENSMUSG00000032127	Vps11	vacuolar protein sorting 11 (yeast)
1519	chr9	44418111	44418205	95	*	1.65778e-06	0.00372613	5.34771e-05	0.00367265	0.000293711	0.000190161	0.0039516	-0.00376144	FALSE	Promoter (<=1kb)	chr9	44410164	44418007	7844	-	382073	uc009pdo.1	-104	ENSMUSG00000043923	Ccdc84	coiled-coil domain containing 84
1520	chr9	44605041	44605181	141	*	4.26099e-05	5.05655e-05	0.00283851	-0.00278794	7.12848e-05	0.254425	0.00844527	0.242647	FALSE	Promoter (<=1kb)	chr9	44604892	44633416	28525	+	13209	uc009pdy.2	289	ENSMUSG00000032097	Ddx6	DEAD (Asp-Glu-Ala-Asp) box polypeptide 6
1521	chr9	44882698	44882754	57	*	0.000132936	3.54917e-05	0.000886751	-0.00085126	3.89658e-05	0.00565497	0.266855	-0.259445	TRUE	Promoter (1-2kb)	chr9	44803355	44881274	77920	-	214162	uc009pep.1	-1424	ENSMUSG00000002028	Kmt2a	lysine (K)-specific methyltransferase 2A
1522	chr9	46012654	46012735	82	*	6.40067e-05	2.97662e-05	0.00075583	-0.000726064	2.05523e-05	0.000493499	2.34452e-05	0.000470014	FALSE	Promoter (<=1kb)	chr9	46012820	46224194	211375	+	70661	uc009pgz.2	-166	ENSMUSG00000034135	Sik3	SIK family kinase 3
1523	chr9	46013015	46013214	200	*	2.45432e-05	0.000860994	3.18122e-05	0.000829182	1.42027e-06	0.327982	0.00955163	0.31843	TRUE	Promoter (<=1kb)	chr9	46012820	46224194	211375	+	70661	uc009pgz.2	394	ENSMUSG00000034135	Sik3	SIK family kinase 3
1524	chr9	46283243	46283263	21	*	1.84818e-08	0.00479546	4.33267e-05	0.00475214	6.59901e-13	0.341627	0.000491729	0.341135	TRUE	Promoter (<=1kb)	chr9	46283012	46294099	11088	+	215051	uc009phi.1	251	ENSMUSG00000032077	Bud13	BUD13 homolog (yeast)
1525	chr9	48836265	48836311	47	*	3.64837e-06	0.193518	0.000420072	0.193098	3.91399e-06	0.00401691	6.35407e-05	0.00395337	TRUE	Promoter (<=1kb)	chr9	48654297	48836222	181926	-	235320	uc009pim.1	-43	ENSMUSG00000066687	Zbtb16	zinc finger and BTB domain containing 16
1526	chr9	48836397	48836464	68	*	6.85137e-05	3.09447e-05	0.000987722	-0.000956778	1.17455e-06	3.77935e-05	0.00248691	-0.00244912	TRUE	Promoter (<=1kb)	chr9	48654297	48836222	181926	-	235320	uc009pim.1	-175	ENSMUSG00000066687	Zbtb16	zinc finger and BTB domain containing 16
1527	chr9	48836397	48836464	68	*	5.38831e-11	0.384876	0.00121523	0.383754	1.17455e-06	3.77935e-05	0.00248691	-0.00244912	FALSE	Promoter (<=1kb)	chr9	48654297	48836222	181926	-	235320	uc009pim.1	-175	ENSMUSG00000066687	Zbtb16	zinc finger and BTB domain containing 16
1528	chr9	53384173	53384175	3	*	2.92403e-10	0.0039936	4.18024e-05	0.00395179	1.26329e-05	7.20749e-05	0.00418496	-0.00411289	FALSE	Promoter (<=1kb)	chr9	53384023	53401867	17845	+	68304	uc009pmb.1	152	ENSMUSG00000034487	Kdelc2	KDEL (Lys-Asp-Glu-Leu) containing 2
[truncated: 157 more rows]

## Sheet: Dir true
	seqnames	start	end	width	strand	median.p_SVF	median.meth.group1_SVF	median.meth.group2_SVF	median.meth.diff_SVF	median.p_satelliteCells	median.meth.group1_satelliteCells	median.meth.group2_satelliteCells	median.meth.diff_satelliteCells	sameDirection	annotation	geneChr	geneStart	geneEnd	geneLength	geneStrand	geneId	transcriptId	distanceToTSS	ENSEMBL	SYMBOL	GENENAME
[truncated: 870 more rows]
