# Supplementary material for: Ionizing Radiation Potentiates High-Fat Diet–Induced Insulin Resistance and Reprograms Skeletal Muscle and Adipose Progenitor Cells
Source: Oxford University Press journal article supplement (doi:10.2337/db16-0364), 2016-09-20
Supplement: db160364supplementarydata8.xlsx [file db160364supplementarydata8.xlsx]

## Sheet: MethylCapture SC
MBD			averageReadCoverage
Sample	#reads	% aligned	CpGislands	CpGshores	RefSeqExons	Promoters
1	35220885	98.86	22.8436	15.029	20.3355	10.002
2	9409541	94.81	20.4436	6.20481	11.0832	3.65136
3	9334843	95.73	31.7464	8.92263	15.0367	5.23781
4	12019094	95.5	13.9106	7.9209	11.7342	5.21185
5	12773257	96.76	17.3508	8.48011	12.7655	5.38482
6	26056262	97.79	17.2353	10.6864	14.9779	7.1048
7	26486615	98.05	16.7431	11.6788	16.0481	7.8599
8	14782405	98.97	11.3322	5.1392	8.44192	3.22162
9	33723166	98.99	30.3223	10.6367	17.2058	6.33723
10	28164793	97.88	19.6831	9.8707	13.893	6.31742
11	14064848	98.4	14.4838	5.64464	9.68017	3.61801
12	27021038	97.84	16.955	11.7906	15.5014	8.10484
13	45362469	98.19	30.0144	17.9723	25.0513	11.7685
14	7798254	92.05	11.4793	5.60768	8.27499	3.69403
15	4645098	90.65	3.17227	3.3396	3.89519	2.48187
16	4786256	91.75	5.06212	3.67864	4.77742	2.59534
17	10809127	93.25	10.4661	9.33849	11.0843	6.5948
18	55817756	98.6	47.3538	19.2383	28.658	12.1399
19	3718623	98.24	3.05762	1.81715	2.47542	1.21598
20	12500927	98.18	9.21068	4.34611	6.95084	2.85902
21	11529323	97.81	9.34904	4.9087	6.91032	3.26143
22	10874972	97.77	5.60564	6.5832	7.2577	4.67064
23	35820102	98.56	26.8643	14.0767	20.8579	9.08194
24	14168704	97.64	10.8905	6.12506	9.06429	4.10415

## Sheet: RRBS SC
RRBS
Satellite cells
Sample	Reads	%aligned	averageReadCoverage
1	18036940	65.8	14.6601
2	19846445	66.4	15.3561
3	19570794	66.1	15.0104
4	11076862	62.4	9.10987
5	16565743	67.2	13.643
6	13066105	67.2	10.9178
7	11742362	66.8	10.2384
8	15263657	67.8	12.8627
9	9885176	68.1	8.69488
10	22639148	66.8	18.0364
11	9326102	63.6	8.14783
12	12468592	67.8	11.2229
13	22212696	66.1	16.3977
14	19509518	67.4	15.4738
15	7909200	56.1	6.27584
16	6675540	55.6	5.2893
17	8593941	65.1	7.55053
18	10749298	68.4	9.88406
19	10217798	68.6	9.31063
20	15635475	69.3	13.369
21	17322009	68.7	14.2432
22	17678293	65.8	14.5853
23	9925681	66.3	8.96281
24	11459449	68.1	10.7566
# CpGs	1110557
	Background		hfd	irr	interaction
# clusters	77042		9622	9830	1057
# Clusters in promoter	34649		8810	8963	891
# Clusters in gene body	21980		351	406	87
# Clusters in enhancers	2435		261	247	32
# Clusters in distal intergenic	16538		461	461	79
# genes covered by >= 1 cluster	16065

## Sheet: RNA seq SC
RNA Seq
Sample	Raw.Reads	Trimmed.Reads	Mapped.Reads	Assigned.Reads	Avg.Read.Coverage
1	38032095	37999173	37016435	29638190	2276.85
2	31106064	31045629	30452772	24687972	1896.67
3	30455751	30426419	29977641	23809364	1829.52
4	31420344	31379829	30838457	24971338	1918.63
5	30545724	30511099	30072121	23655163	1817.24
6	29318587	29289081	28860648	23320189	1791.64
7	30962233	30933227	30446175	24756803	1902.05
8	30652564	30617820	30155669	24465982	1879.59
10	39478784	39456141	38868320	30306976	1677.98
11	32431675	32411437	31551563	24537350	2327.63
12	32213010	32176187	31655392	25337220	1884.47
13	28962224	28808213	28037816	22451828	1946.28
14	28862346	28836571	28386693	22233498	1724.65
15	38185142	38143440	37512921	30301677	1707.89
16	32650167	32627081	31970141	26304244	2327.91
9	28526061	28510111	27934204	21837886	2020.84
17	32401068	32323264	28133944	18659341	1433.6
18	31398993	31377319	30841657	24764784	1902.78
19	37413789	37386243	35314239	26735233	2053.88
20	33299285	33276356	32808404	26767512	2056.26
21	32025250	31908073	31342408	25499365	1958.91
22	30755875	30738320	30324995	24721594	1899.27
23	29759920	29739902	29031197	22602840	1736.17
24	15912552	15901306	15300324	12080574	928.3
Diff.expr (FDR < 0.1)	827
Upregulated (lofFC > 0)	377
Downregulated (logFC < 0)	450

## Sheet: RRBS SVF
RRBS
SVF
Sample	Reads	%aligned	averageReadCoverage
1	11295781	64.9	9.35028
2	14549780	66.8	12.2661
3	6349906	50.6	4.53792
4	7045757	59	5.32048
5	8853353	65.4	7.91108
6	13026177	66.9	11.1797
7	12409075	67.1	11.4116
8	10179473	67.7	9.51187
9	11788920	69.2	10.6308
10	15148880	66.2	12.7046
11	15524127	66.6	13.2857
12	19638806	68.1	13.8859
13	8108622	66.8	7.96012
14	8292947	65.8	8.48682
15	15994499	66.1	13.7613
16	4178148	53.8	3.55644
17	7383966	67.5	7.7729
18	11809028	68.4	11.9292
19	9564283	68.7	10.2685
20	10120620	69.1	10.754
21	8786794	69	9.87688
22	10410481	67.4	10.792
23	11321133	64.9	11.2511
24	9738629	67.4	10.4902
# CpGs	1113785
	Background		hfd	irr	interaction
# clusters	70955		8008	5501	1208
# Clusters in promoter	32433		6727	4957	1028
# Clusters in gene body	21980		684	235	90
# Clusters in enhancers	2435		225	135	30
# Clusters in distal intergenic	16538		597	309	90
# genes covered by >= 1 cluster	15874
